# Supplementary material for: Transcriptome analysis during 4-vinylcyclohexene diepoxide exposure-induced premature ovarian insufficiency in mice
Source: PeerJ. 2024 Apr 18;12:e17251. doi: 10.7717/peerj.17251 (PMC11032656; doi:10.7717/peerj.17251)
Supplement: Table S2 [file peerj-12-17251-s004.xlsx]

## Sheet: Summary of data quality
Summary of data quality
sample: Sample Name; library：Sample library number; raw_reads：Number of reads in the raw data; raw_bases：Number of bases in the raw data; clean_reads：Number of reads after raw data filtering; clean_bases：Number of bases filtered from raw data; error_rate：Overall sequencing error rate of data; Q20：Percentage of total bases with Phred values greater than 20; Q30：Percentage of total bases with Phred…
sample	library	raw_reads	raw_bases	clean_reads	clean_bases	error_rate	Q20	Q30	GC_pct
CON_1	FRAS23H001827-2r	42728230	6.41G	42087618	6.31G	0.03	97.6	93.47	48.07
CON_2	FRAS23H001828-2r	39929112	5.99G	38995582	5.85G	0.03	97.77	93.86	47.59
CON_3	FRAS23H001829-2r	42757654	6.41G	41508602	6.23G	0.03	97.81	93.92	46.42
CON_4	FRAS23H001830-2r	41282860	6.19G	40412906	6.06G	0.03	97.63	93.52	46.92
CON_5	FRAS23H001831-2r	45152506	6.77G	44249456	6.64G	0.03	97.86	94.03	47.48
V15_1	FRAS23H001817-3r	42089570	6.31G	41294982	6.19G	0.03	97.73	93.76	47.06
V15_2	FRAS23H001818-2r	42581108	6.39G	41740532	6.26G	0.03	97.87	94.07	47.63
V15_3	FRAS23H001819-2r	44596072	6.69G	43727918	6.56G	0.03	97.75	93.78	46.96
V15_4	FRAS23H001820-2r	39748234	5.96G	38422060	5.76G	0.03	97.86	94.06	47.09
V15_5	FRAS23H001821-2r	41669374	6.25G	40788926	6.12G	0.03	97.65	93.63	48.44
V30_1	FRAS23H001822-2r	39357000	5.9G	38590774	5.79G	0.03	97.44	93.19	48.15
V30_2	FRAS23H001823-2r	43448688	6.52G	42593848	6.39G	0.02	97.95	94.27	48.98
V30_3	FRAS23H001824-2r	44859138	6.73G	44007526	6.6G	0.02	98.01	94.45	48.76
V30_4	FRAS23H001825-2r	43817470	6.57G	42986952	6.45G	0.02	98.06	94.5	48.63
V30_5	FRAS23H001826-2r	44742756	6.71G	43896862	6.58G	0.03	97.85	94.06	48.38

## Sheet: Sample contrast ratio
Sample matching rate statistics
total_reads: Number of clean reads of sequencing data after quality control; total_map: Number of reads matched to the genome and their percentages; unique_map: Number and percentage of reads matched to a unique position in the reference genome; multi_map: Number and percentage of reads matched to multiple locations in the reference genome; read1_map: Number and percentage of read1 matched to the…
sample	total_reads	total_map	unique_map	multi_map	read1_map	read2_map	positive_map	negative_map	splice_map	unsplice_map	proper_map
CON_1	42087618	40864129(97.09%)	37756175(89.71%)	3107954(7.38%)	18935272(44.99%)	18820903(44.72%)	18869563(44.83%)	18886612(44.87%)	14697897(34.92%)	23058278(54.79%)	36487802(86.69%)
CON_2	38995582	37945287(97.31%)	35709579(91.57%)	2235708(5.73%)	17886682(45.87%)	17822897(45.7%)	17841982(45.75%)	17867597(45.82%)	12987303(33.3%)	22722276(58.27%)	34349538(88.09%)
CON_3	41508602	40271216(97.02%)	36733182(88.5%)	3538034(8.52%)	18386839(44.3%)	18346343(44.2%)	18356351(44.22%)	18376831(44.27%)	12076619(29.09%)	24656563(59.4%)	34972210(84.25%)
CON_4	40412906	39320858(97.3%)	36596116(90.56%)	2724742(6.74%)	18349369(45.4%)	18246747(45.15%)	18288934(45.26%)	18307182(45.3%)	12280478(30.39%)	24315638(60.17%)	35166050(87.02%)
CON_5	44249456	43168971(97.56%)	40173770(90.79%)	2995201(6.77%)	20102012(45.43%)	20071758(45.36%)	20077544(45.37%)	20096226(45.42%)	15564820(35.18%)	24608950(55.61%)	38776106(87.63%)
V15_1	41294982	39968735(96.79%)	36299213(87.9%)	3669522(8.89%)	18180195(44.03%)	18119018(43.88%)	18145116(43.94%)	18154097(43.96%)	12403624(30.04%)	23895589(57.87%)	35075290(84.94%)
V15_2	41740532	40697413(97.5%)	38066807(91.2%)	2630606(6.3%)	19063450(45.67%)	19003357(45.53%)	19023473(45.58%)	19043334(45.62%)	14255194(34.15%)	23811613(57.05%)	36678988(87.87%)
V15_3	43727918	42548370(97.3%)	38816267(88.77%)	3732103(8.53%)	19448791(44.48%)	19367476(44.29%)	19398423(44.36%)	19417844(44.41%)	13685987(31.3%)	25130280(57.47%)	37393554(85.51%)
V15_4	38422060	37482759(97.56%)	34735346(90.4%)	2747413(7.15%)	17374664(45.22%)	17360682(45.18%)	17358363(45.18%)	17376983(45.23%)	12706915(33.07%)	22028431(57.33%)	33542068(87.3%)
V15_5	40788926	39604946(97.1%)	37312244(91.48%)	2292702(5.62%)	18697586(45.84%)	18614658(45.64%)	18645661(45.71%)	18666583(45.76%)	13322779(32.66%)	23989465(58.81%)	36228294(88.82%)
V30_1	38590774	37388006(96.88%)	34717133(89.96%)	2670873(6.92%)	17422569(45.15%)	17294564(44.82%)	17350015(44.96%)	17367118(45.0%)	11357659(29.43%)	23359474(60.53%)	33584888(87.03%)
V30_2	42593848	41515366(97.47%)	39444724(92.61%)	2070642(4.86%)	19740722(46.35%)	19704002(46.26%)	19712074(46.28%)	19732650(46.33%)	15563635(36.54%)	23881089(56.07%)	38283622(89.88%)
V30_3	44007526	42917612(97.52%)	40662212(92.4%)	2255400(5.13%)	20346857(46.23%)	20315355(46.16%)	20323584(46.18%)	20338628(46.22%)	15942154(36.23%)	24720058(56.17%)	39413048(89.56%)
V30_4	42986952	42004590(97.71%)	39676800(92.3%)	2327790(5.42%)	19843076(46.16%)	19833724(46.14%)	19831308(46.13%)	19845492(46.17%)	15516743(36.1%)	24160057(56.2%)	38417608(89.37%)
V30_5	43896862	42789033(97.48%)	40399478(92.03%)	2389555(5.44%)	20235789(46.1%)	20163689(45.93%)	20189002(45.99%)	20210476(46.04%)	15479697(35.26%)	24919781(56.77%)	39046894(88.95%)

## Sheet: Sample comparison area
Sample comparison regional statistics
sample: Sample Name; exon: Number and percentage of reads with samples matched to exonic regions of the genome; intron: Number and percentage of reads with samples aligned to genomic intronic regions; intergenic: Number and percentage of reads with samples matched to intergenomic regions;
sample	exon	intron	intergenic
CON_1	5720226326(93.4804%)	248224112(4.0565%)	150725664(2.4632%)
CON_2	5209969335(91.7130%)	324125733(5.7057%)	146638279(2.5813%)
CON_3	5572628103(92.4659%)	285540867(4.7379%)	168518576(2.7962%)
CON_4	5330434359(90.5377%)	386002053(6.5563%)	171097160(2.9061%)
CON_5	6067108679(93.8596%)	247880043(3.8348%)	149033565(2.3056%)
V15_1	5432753112(90.7741%)	349325178(5.8368%)	202839101(3.3892%)
V15_2	5663731021(92.9394%)	255793982(4.1975%)	174482579(2.8632%)
V15_3	5923092929(92.9723%)	290712849(4.5632%)	157006910(2.4645%)
V15_4	5265397993(93.8251%)	208367520(3.7129%)	138163495(2.4620%)
V15_5	5441368140(91.7592%)	331483416(5.5899%)	157202690(2.6509%)
V30_1	5110318090(91.2965%)	329323679(5.8834%)	157849822(2.8200%)
V30_2	5784619390(93.0550%)	264294444(4.2516%)	167430249(2.6934%)
V30_3	5996969379(93.3180%)	258712804(4.0258%)	170701396(2.6563%)
V30_4	5856456401(93.1076%)	274279237(4.3606%)	159248642(2.5318%)
V30_5	5954095898(92.9280%)	279852347(4.3678%)	173264594(2.7042%)

## Sheet: gene_count
Gene readcount expression matrix the samples
gene_id: Gene number; sample: Raw readcount values for each sample; gene_name: Gene name; gene_chr: Name of the chromosome where the gene is located; gene_start: Starting position of the chromosome where the gene is located; gene_end: Termination position of the chromosome where the gene is located; gene_strand: Information about the positive and negative strands of the chromosome on which the ge…
gene_id	V15_1	V15_2	V15_3	V15_4	V15_5	V30_1	V30_2	V30_3	V30_4	V30_5	CON_1	CON_2	CON_3	CON_4	CON_5	gene_name	gene_chr	gene_start	gene_end	gene_strand	gene_length	gene_biotype	gene_description	Subfamily	Family
ENSMUSG00000064351	665969	366737	669746	385244	304682	382734	266280	288585	316592	314862	511935	293139	527451	396616	410200	mt-Co1	MT	5328	6872	+	1545	protein_coding	mitochondrially encoded cytochrome c oxidase I [Source:MGI Symbol;Acc:MGI:102504]	-	-
ENSMUSG00000064370	267775	164030	271664	168985	136781	207090	117799	128975	139432	143974	198843	124041	258030	179948	178943	mt-Cytb	MT	14145	15288	+	1144	protein_coding	mitochondrially encoded cytochrome b [Source:MGI Symbol;Acc:MGI:102501]	-	-
ENSMUSG00000037742	143127	140981	157361	136155	108933	80200	117203	113008	119252	112253	167614	130213	132439	124781	167512	Eef1a1	9	78478449	78489151	-	2493	protein_coding	eukaryotic translation elongation factor 1 alpha 1 [Source:MGI Symbol;Acc:MGI:1096881]	-	-
ENSMUSG00000064341	268058	111996	207652	130002	94185	140720	71995	85159	87753	95968	156872	88229	151315	129676	128105	mt-Nd1	MT	2751	3707	+	957	protein_coding	mitochondrially encoded NADH dehydrogenase 1 [Source:MGI Symbol;Acc:MGI:101787]	-	-
ENSMUSG00000027871	74073	144234	130793	133940	115494	143944	139788	160149	149532	165319	66316	116458	71935	131341	116847	Hsd3b1	3	98852194	98859794	-	1855	protein_coding	hydroxy-delta-5-steroid dehydrogenase, 3 beta- and steroid delta-isomerase 1 [Source:MGI Symbol;Acc:MGI:96233]	-	-
ENSMUSG00000064367	249888	92911	196568	107964	82828	120472	66108	82745	90784	82735	169916	90772	172135	116734	109424	mt-Nd5	MT	11742	13565	+	1824	protein_coding	mitochondrially encoded NADH dehydrogenase 5 [Source:MGI Symbol;Acc:MGI:102496]	-	-
ENSMUSG00000032323	58971	131040	99241	105267	94003	140099	184625	197773	197772	202564	59301	78578	55788	78526	83292	Cyp11a1	9	58006411	58027023	+	4804	protein_coding	cytochrome P450, family 11, subfamily a, polypeptide 1 [Source:MGI Symbol;Acc:MGI:88582]	-	-
ENSMUSG00000064345	186426	92913	147104	99402	68160	140744	67843	81988	82625	95531	88002	63502	121656	101096	85273	mt-Nd2	MT	3914	4951	+	1038	protein_coding	mitochondrially encoded NADH dehydrogenase 2 [Source:MGI Symbol;Acc:MGI:102500]	-	-
ENSMUSG00000064363	196162	83643	153283	86032	74918	126845	60524	69412	77578	79662	119254	60616	132252	95732	86596	mt-Nd4	MT	10167	11544	+	1378	protein_coding	mitochondrially encoded NADH dehydrogenase 4 [Source:MGI Symbol;Acc:MGI:102498]	-	-
ENSMUSG00000053279	65988	49494	72192	42391	60576	80260	93462	133287	97026	131896	23842	39943	47766	31829	60790	Aldh1a1	19	20492715	20643462	+	4934	protein_coding	aldehyde dehydrogenase family 1, subfamily A1 [Source:MGI Symbol;Acc:MGI:1353450]	-	-
ENSMUSG00000018339	11698	19093	25329	17256	25610	178935	135731	129534	140214	139918	13013	14899	22047	21869	20166	Gpx3	11	54902453	54910377	+	1813	protein_coding	glutathione peroxidase 3 [Source:MGI Symbol;Acc:MGI:105102]	-	-
ENSMUSG00000025955	39098	46373	59366	49320	57481	62226	52328	64142	57972	67732	29110	53021	49681	49381	62413	Akr1cl	1	65012689	65032759	-	4209	protein_coding	aldo-keto reductase family 1, member C-like [Source:MGI Symbol;Acc:MGI:1918111]	-	-
ENSMUSG00000034994	64450	47310	60149	42755	46975	34033	56750	53574	56726	51555	89299	47617	42732	39284	57300	Eef2	10	81176631	81182498	+	3324	protein_coding	eukaryotic translation elongation factor 2 [Source:MGI Symbol;Acc:MGI:95288]	-	-
ENSMUSG00000060126	41183	41522	49709	41997	44700	41873	34372	34386	34080	35462	37163	37299	57788	47772	59763	Tpt1	14	75845093	75848525	+	2380	protein_coding	tumor protein, translationally-controlled 1 [Source:MGI Symbol;Acc:MGI:104890]	-	-
ENSMUSG00000032418	71987	67724	36829	36283	18028	28302	52149	51720	58883	54062	26382	21658	16795	40690	34410	Me1	9	86581371	86695953	-	3848	protein_coding	malic enzyme 1, NADP(+)-dependent, cytosolic [Source:MGI Symbol;Acc:MGI:97043]	-	-
ENSMUSG00000064368	74361	29337	56713	38061	24649	40262	18478	23598	25275	25253	44788	27664	58644	37959	35460	mt-Nd6	MT	13552	14070	-	519	protein_coding	mitochondrially encoded NADH dehydrogenase 6 [Source:MGI Symbol;Acc:MGI:102495]	-	-
ENSMUSG00000023944	35558	44233	38004	39362	30329	25204	27665	29976	32738	30235	41971	36004	31648	35586	43593	Hsp90ab1	17	45567775	45573271	-	2999	protein_coding	heat shock protein 90 alpha (cytosolic), class B member 1 [Source:MGI Symbol;Acc:MGI:96247]	-	-
ENSMUSG00000017707	25557	27019	23405	18723	19039	31590	56870	57497	48446	61716	18009	21488	20571	22812	29606	Serinc3	2	163623272	163645131	-	3840	protein_coding	serine incorporator 3 [Source:MGI Symbol;Acc:MGI:1349457]	-	-
ENSMUSG00000025203	19950	32528	38627	47818	28900	18562	27271	37298	28102	36572	43154	31238	21539	27709	24929	Scd2	19	44293676	44306864	+	5453	protein_coding	stearoyl-Coenzyme A desaturase 2 [Source:MGI Symbol;Acc:MGI:98240]	-	-
ENSMUSG00000015656	35193	46497	36112	37102	23949	21254	19277	18958	25231	24765	29084	28716	28879	38283	40754	Hspa8	9	40800984	40810087	+	4301	protein_coding	heat shock protein 8 [Source:MGI Symbol;Acc:MGI:105384]	-	-
ENSMUSG00000022010	36072	32782	31478	28596	35310	31444	27478	33875	26966	36432	14651	24287	27516	30094	33834	Tsc22d1	14	76414961	76507765	+	8994	protein_coding	TSC22 domain family, member 1 [Source:MGI Symbol;Acc:MGI:109127]	-	-
ENSMUSG00000031451	9371	13105	21467	15478	37766	46646	31827	60711	39485	58737	12344	21958	26073	14118	28357	Gas6	8	13465374	13494490	-	2548	protein_coding	growth arrest specific 6 [Source:MGI Symbol;Acc:MGI:95660]	-	-
ENSMUSG00000032281	23787	20670	23499	18069	29461	38182	39857	57904	37864	56671	11773	19839	15051	18542	24143	Acsbg1	9	54604877	54661870	-	3604	protein_coding	acyl-CoA synthetase bubblegum family member 1 [Source:MGI Symbol;Acc:MGI:2385656]	-	-
ENSMUSG00000004207	15644	28309	23290	21134	25860	25106	43526	39771	48312	37194	20220	23433	21914	25573	29548	Psap	10	60277627	60302597	+	2744	protein_coding	prosaposin [Source:MGI Symbol;Acc:MGI:97783]	-	-
ENSMUSG00000018593	26384	36410	28170	25971	25358	27043	29177	25226	31676	29445	18446	22685	22674	29845	28723	Sparc	11	55394500	55423183	-	3788	protein_coding	secreted acidic cysteine rich glycoprotein [Source:MGI Symbol;Acc:MGI:98373]	-	-
ENSMUSG00000032968	14985	14027	21817	23010	61264	25882	20561	48778	22754	35725	11659	25013	16774	21994	38350	Inha	1	75507077	75510366	+	1475	protein_coding	inhibin alpha [Source:MGI Symbol;Acc:MGI:96569]	-	-
ENSMUSG00000032216	26667	28061	24717	25202	23127	13881	30712	30531	31143	29405	31829	26182	22256	20788	31893	Nedd4	9	72662346	72749852	+	10973	protein_coding	neural precursor cell expressed, developmentally down-regulated 4 [Source:MGI Symbol;Acc:MGI:97297]	-	-
ENSMUSG00000025950	18835	31421	31055	35392	20114	22751	27539	26180	35547	28014	21227	24120	15556	28439	19389	Idh1	1	65158616	65186500	-	2771	protein_coding	isocitrate dehydrogenase 1 (NADP+), soluble [Source:MGI Symbol;Acc:MGI:96413]	-	-
ENSMUSG00000022037	15307	20380	34956	25086	40115	25247	23485	34538	28526	32345	14785	18672	29975	15404	22988	Clu	14	65968483	65981547	+	3437	protein_coding	clusterin [Source:MGI Symbol;Acc:MGI:88423]	-	-
ENSMUSG00000050953	15610	19383	27467	31166	48617	11624	16378	28090	17124	24798	14790	34465	23065	24752	44214	Gja1	10	56377330	56402513	+	10257	protein_coding	gap junction protein, alpha 1 [Source:MGI Symbol;Acc:MGI:95713]	-	-
ENSMUSG00000029580	35760	26747	31816	23223	28541	20396	18888	19559	19203	18992	29603	25102	28638	25198	29732	Actb	5	142903115	142906754	-	2679	protein_coding	actin, beta [Source:MGI Symbol;Acc:MGI:87904]	-	-
ENSMUSG00000026365	19015	22033	22921	18442	21244	18212	32092	30062	29886	29512	17474	25150	29148	19803	29452	Cfh	1	140084708	140183764	-	8383	protein_coding	complement component factor h [Source:MGI Symbol;Acc:MGI:88385]	-	-
ENSMUSG00000033491	50230	44019	23460	20256	10786	16178	24474	20946	26241	22555	15145	13158	8873	32055	26128	Prss35	9	86743649	86758443	+	3444	protein_coding	protease, serine 35 [Source:MGI Symbol;Acc:MGI:2444800]	-	-
ENSMUSG00000032399	18787	24243	26683	25124	22632	16207	19881	20009	19691	19272	23990	24805	25690	23974	30818	Rpl4	9	64173375	64178666	+	2007	protein_coding	ribosomal protein L4 [Source:MGI Symbol;Acc:MGI:1915141]	-	-
ENSMUSG00000037852	12799	21914	23245	21207	21231	13816	29146	29162	31190	26519	18145	21944	20979	19077	26864	Cpe	8	64592542	64693054	-	2609	protein_coding	carboxypeptidase E [Source:MGI Symbol;Acc:MGI:101932]	-	-
ENSMUSG00000026043	40440	29238	24791	14580	21100	14757	21864	16442	23212	18623	17429	14759	25188	22924	27978	Col3a1	1	45311538	45349706	+	9816	protein_coding	collagen, type III, alpha 1 [Source:MGI Symbol;Acc:MGI:88453]	-	-
ENSMUSG00000067274	21795	24417	26117	23179	21604	15933	19500	17127	19325	17463	24988	22665	23678	21710	28972	Rplp0	5	115559467	115563727	+	1659	protein_coding	ribosomal protein, large, P0 [Source:MGI Symbol;Acc:MGI:1927636]	-	-
ENSMUSG00000005610	22249	24446	26270	23380	18544	11570	20814	22673	22723	23269	28435	20784	21160	18764	22223	Eif4g2	7	111067750	111083030	-	10166	protein_coding	eukaryotic translation initiation factor 4, gamma 2 [Source:MGI Symbol;Acc:MGI:109207]	-	-
ENSMUSG00000024661	16823	20859	24386	22543	20355	25181	25082	24416	23553	26230	16689	18717	20544	16596	23197	Fth1	19	9982703	9985092	+	866	protein_coding	ferritin heavy polypeptide 1 [Source:MGI Symbol;Acc:MGI:95588]	-	-
ENSMUSG00000032518	20715	22685	24644	23219	20747	19206	15906	15399	16557	16057	19699	20813	24748	23119	28769	Rpsa	9	120127689	120132369	+	3170	protein_coding	ribosomal protein SA [Source:MGI Symbol;Acc:MGI:105381]	-	-
ENSMUSG00000026600	14604	20013	20049	20044	13943	20161	29738	36381	29682	33868	14527	14223	11993	14962	14640	Soat1	1	156424525	156474331	-	9791	protein_coding	sterol O-acyltransferase 1 [Source:MGI Symbol;Acc:MGI:104665]	-	-
ENSMUSG00000021939	13387	19392	21205	16494	17918	21541	25678	26885	24419	27099	21172	14507	22105	14206	19489	Ctsb	14	63122462	63145923	+	6051	protein_coding	cathepsin B [Source:MGI Symbol;Acc:MGI:88561]	-	-
ENSMUSG00000021319	7698	8370	21642	11472	39146	21611	30274	34716	42717	28431	7005	11199	23095	7806	7149	Sfrp4	13	19623104	19632994	+	4179	protein_coding	secreted frizzled-related protein 4 [Source:MGI Symbol;Acc:MGI:892010]	-	-
ENSMUSG00000028639	39299	24040	17348	8815	18730	21244	22985	18340	24054	22437	13317	8373	13064	15792	15969	Ybx1	4	119277981	119294604	-	2531	protein_coding	Y box protein 1 [Source:MGI Symbol;Acc:MGI:99146]	CSD	CSD
ENSMUSG00000028970	2251	12885	6817	5872	3232	30930	51886	31786	58192	39302	10128	5540	5287	9948	8407	Abcb1b	5	8798147	8866315	+	7990	protein_coding	ATP-binding cassette, sub-family B (MDR/TAP), member 1B [Source:MGI Symbol;Acc:MGI:97568]	-	-
ENSMUSG00000032051	8837	23813	15118	17996	18791	27145	25573	31243	24058	27361	6133	11406	10555	15078	12583	Fdx1	9	51943306	51963556	-	3104	protein_coding	ferredoxin 1 [Source:MGI Symbol;Acc:MGI:103224]	-	-
ENSMUSG00000037936	10913	23482	20689	25792	17667	14264	22428	28074	23630	24323	13958	14379	6574	14868	11235	Scarb1	5	125277087	125341094	-	8500	protein_coding	scavenger receptor class B, member 1 [Source:MGI Symbol;Acc:MGI:893578]	-	-
ENSMUSG00000028081	12730	18535	19845	19777	17968	13427	15666	14805	15139	15046	17208	19901	23808	18680	24871	Rps3a1	3	86137940	86142702	-	977	protein_coding	ribosomal protein S3A1 [Source:MGI Symbol;Acc:MGI:1202063]	-	-
ENSMUSG00000031996	14771	19485	20792	21532	18339	12428	17011	17134	18821	16777	18343	19101	15458	17294	16248	Aplp2	9	31149557	31211815	-	5875	protein_coding	amyloid beta (A4) precursor-like protein 2 [Source:MGI Symbol;Acc:MGI:88047]	-	-
ENSMUSG00000043716	15508	17920	20203	18269	17002	14096	13864	14033	14661	15030	18151	18645	21243	18930	23302	Rpl7	1	16101295	16104662	-	2687	protein_coding	ribosomal protein L7 [Source:MGI Symbol;Acc:MGI:98073]	-	-
ENSMUSG00000020372	15247	18076	19029	17893	19715	14527	15020	14803	15535	14994	16298	18237	19956	17504	23307	Rack1	11	48800332	48806434	+	5119	protein_coding	receptor for activated C kinase 1 [Source:MGI Symbol;Acc:MGI:101849]	-	-
ENSMUSG00000060036	15690	17953	19946	18349	15813	12338	14784	14246	14591	14006	20626	18071	17865	17156	23010	Rpl3	15	80077791	80091868	-	3175	protein_coding	ribosomal protein L3 [Source:MGI Symbol;Acc:MGI:1351605]	-	-
ENSMUSG00000010307	11099	15804	16069	12655	17064	31602	22848	23712	23161	23792	8166	9549	11035	12129	12679	Tmem86a	7	47050601	47054777	+	1887	protein_coding	transmembrane protein 86A [Source:MGI Symbol;Acc:MGI:1915143]	-	-
ENSMUSG00000020719	8276	16663	14869	16616	18309	18550	18115	19292	18371	18828	12028	18838	15308	17741	17809	Ddx5	11	106780355	106789185	-	5775	protein_coding	DEAD (Asp-Glu-Ala-Asp) box polypeptide 5 [Source:MGI Symbol;Acc:MGI:105037]	-	-
ENSMUSG00000022108	9838	13899	15381	13285	16711	16642	19870	19000	19605	19310	15527	16671	19075	13555	18083	Itm2b	14	73362226	73385289	-	2732	protein_coding	integral membrane protein 2B [Source:MGI Symbol;Acc:MGI:1309517]	-	-
ENSMUSG00000022283	21978	18742	21849	19022	14003	9463	11975	10341	12659	10887	22435	16919	18603	16788	20228	Pabpc1	15	36595661	36609668	-	6540	protein_coding	poly(A) binding protein, cytoplasmic 1 [Source:MGI Symbol;Acc:MGI:1349722]	-	-
ENSMUSG00000029661	15384	17136	19993	11765	21592	13577	14050	11734	14208	11498	15960	14156	25530	16780	19423	Col1a2	6	4504814	4541544	+	12426	protein_coding	collagen, type I, alpha 2 [Source:MGI Symbol;Acc:MGI:88468]	-	-
ENSMUSG00000027875	12976	10883	11888	10027	15291	21810	23472	22569	22364	28934	7841	13225	11990	12364	16850	Hmgcs2	3	98280435	98310738	+	3290	protein_coding	3-hydroxy-3-methylglutaryl-Coenzyme A synthase 2 [Source:MGI Symbol;Acc:MGI:101939]	-	-
ENSMUSG00000058135	8977	10892	10374	9667	12992	32480	22950	29484	20775	29525	6359	9972	13204	9420	12412	Gstm1	3	108012255	108017973	-	1473	protein_coding	glutathione S-transferase, mu 1 [Source:MGI Symbol;Acc:MGI:95860]	-	-
ENSMUSG00000031502	25654	22113	16105	13572	16372	10024	13819	12103	14007	12704	15114	14432	13864	18046	17291	Col4a1	8	11198423	11312826	-	7464	protein_coding	collagen, type IV, alpha 1 [Source:MGI Symbol;Acc:MGI:88454]	-	-
ENSMUSG00000000594	13767	15344	23917	23779	16019	9138	10592	9001	17372	9719	30275	19079	9306	16745	9973	Gm2a	11	55098115	55113029	+	4127	protein_coding	GM2 ganglioside activator protein [Source:MGI Symbol;Acc:MGI:95762]	-	-
ENSMUSG00000027248	11533	17170	17300	17391	16361	12396	11658	12912	12467	13036	17298	15322	18021	19089	21624	Pdia3	2	121413775	121438687	+	3139	protein_coding	protein disulfide isomerase associated 3 [Source:MGI Symbol;Acc:MGI:95834]	-	-
ENSMUSG00000005268	14424	15665	15596	17332	8647	10481	22770	24577	22997	25128	15961	12477	5665	11106	7365	Prlr	15	10177238	10349180	+	15339	protein_coding	prolactin receptor [Source:MGI Symbol;Acc:MGI:97763]	-	-
ENSMUSG00000003555	2681	1832	6443	3155	17587	30873	28527	52002	20668	43937	325	3107	7764	997	6398	Cyp17a1	19	46667165	46672974	-	2166	protein_coding	cytochrome P450, family 17, subfamily a, polypeptide 1 [Source:MGI Symbol;Acc:MGI:88586]	-	-
ENSMUSG00000025393	11458	17038	15516	15120	14412	11472	16352	17489	17002	17289	14006	15167	11074	14224	17685	Atp5b	10	128083273	128090391	+	4237	protein_coding	ATP synthase, H+ transporting mitochondrial F1 complex, beta subunit [Source:MGI Symbol;Acc:MGI:107801]	-	-
ENSMUSG00000026864	11323	16008	17309	17946	15694	9733	11444	14034	11524	13287	15956	15416	16782	16970	21456	Hspa5	2	34771970	34777547	+	4229	protein_coding	heat shock protein 5 [Source:MGI Symbol;Acc:MGI:95835]	-	-
ENSMUSG00000008682	9869	15084	14794	15620	16175	15053	13605	13975	13414	13668	11429	16338	18581	15868	21309	Rpl10	X	74270812	74273135	+	2053	protein_coding	ribosomal protein L10 [Source:MGI Symbol;Acc:MGI:105943]	-	-
ENSMUSG00000029614	13927	16587	16468	15722	15049	14368	11536	12133	12560	12651	13586	16297	15890	17830	20027	Rpl6	5	121204481	121209241	+	3140	protein_coding	ribosomal protein L6 [Source:MGI Symbol;Acc:MGI:108057]	-	-
ENSMUSG00000037161	15938	17183	12935	11576	10100	18440	18729	19652	19776	19882	7894	9092	8589	15725	16485	Mgarp	3	51388412	51396738	-	2067	protein_coding	mitochondria localized glutamic acid rich protein [Source:MGI Symbol;Acc:MGI:1914999]	-	-
ENSMUSG00000002997	12143	13746	14560	12004	27020	8392	15243	26754	12809	20444	5339	11420	8749	10452	22158	Prkar2b	12	31958476	32061296	-	3652	protein_coding	protein kinase, cAMP dependent regulatory, type II beta [Source:MGI Symbol;Acc:MGI:97760]	-	-
ENSMUSG00000031574	19364	17320	10583	16859	5187	14236	25204	23528	21081	19923	10428	6094	5386	15404	8084	Star	8	25806555	25815982	+	4113	protein_coding	steroidogenic acute regulatory protein [Source:MGI Symbol;Acc:MGI:102760]	-	-
ENSMUSG00000022040	15823	17121	20241	19018	19300	11237	10370	7892	15654	8695	14678	12187	13193	15763	12445	Ephx2	14	66084374	66124500	-	2484	protein_coding	epoxide hydrolase 2, cytoplasmic [Source:MGI Symbol;Acc:MGI:99500]	-	-
ENSMUSG00000062825	12087	15222	15983	13621	14548	8461	13499	13618	13664	11744	19490	16353	16380	10403	15121	Actg1	11	120345690	120348542	-	2658	protein_coding	actin, gamma, cytoplasmic 1 [Source:MGI Symbol;Acc:MGI:87906]	-	-
ENSMUSG00000040249	16772	10818	9285	7493	11096	13606	24535	21651	22990	20806	13822	9391	7582	7534	12414	Lrp1	10	127538161	127621148	-	17717	protein_coding	low density lipoprotein receptor-related protein 1 [Source:MGI Symbol;Acc:MGI:96828]	-	-
ENSMUSG00000044533	15385	16399	14870	14249	14622	14358	11989	11148	11721	11410	12200	12650	14296	15218	17833	Rps2	17	24718116	24721929	+	1830	protein_coding	ribosomal protein S2 [Source:MGI Symbol;Acc:MGI:105110]	-	-
ENSMUSG00000025428	12050	14250	14124	12983	13564	12030	14819	17311	15756	16660	13629	12829	11039	12028	14953	Atp5a1	18	77773729	77782869	+	3135	protein_coding	ATP synthase, H+ transporting, mitochondrial F1 complex, alpha subunit 1 [Source:MGI Symbol;Acc:MGI:88115]	-	-
ENSMUSG00000031328	17137	18372	14253	10554	13906	8238	17359	12660	12958	11266	23123	11585	12401	9495	13982	Flna	X	74223461	74249820	-	9400	protein_coding	filamin, alpha [Source:MGI Symbol;Acc:MGI:95556]	-	-
ENSMUSG00000003814	11114	15982	15574	16304	14982	12066	10945	13422	12047	12270	15124	13358	12229	14910	15591	Calr	8	84841850	84846934	-	2880	protein_coding	calreticulin [Source:MGI Symbol;Acc:MGI:88252]	-	-
ENSMUSG00000031320	9111	14369	14863	15208	12398	8950	13142	11614	12002	12077	13026	15661	16058	13259	20802	Rps4x	X	102184941	102189394	-	1631	protein_coding	ribosomal protein S4, X-linked [Source:MGI Symbol;Acc:MGI:98158]	-	-
ENSMUSG00000058558	8563	13562	14439	14371	13845	9840	12560	11984	12465	12364	11851	15680	15824	14771	20279	Rpl5	5	107900502	107909005	+	3920	protein_coding	ribosomal protein L5 [Source:MGI Symbol;Acc:MGI:102854]	-	-
ENSMUSG00000038393	14923	11089	11813	9510	12728	10783	15341	16037	14432	16256	12757	17278	12785	10828	15619	Txnip	3	96557957	96561883	+	3123	protein_coding	thioredoxin interacting protein [Source:MGI Symbol;Acc:MGI:1889549]	-	-
ENSMUSG00000030695	14583	15544	15054	13614	15185	15456	11377	14546	11783	12922	12401	10722	10367	14154	14400	Aldoa	7	126795234	126800751	-	2911	protein_coding	aldolase A, fructose-bisphosphate [Source:MGI Symbol;Acc:MGI:87994]	-	-
ENSMUSG00000000740	9998	12086	12698	12510	16477	16153	13600	12909	12375	12784	11532	14050	13801	13530	16372	Rpl13	8	123102350	123105244	+	2595	protein_coding	ribosomal protein L13 [Source:MGI Symbol;Acc:MGI:105922]	-	-
ENSMUSG00000064339	31369	8872	21212	11252	8463	16285	8673	11351	10027	11145	14724	9714	13697	10020	12273	mt-Rnr2	MT	1094	2675	+	1582	Mt_rRNA	mitochondrially encoded 16S rRNA [Source:MGI Symbol;Acc:MGI:102492]	-	-
ENSMUSG00000086503	11470	13168	11386	11056	15356	14277	11538	11764	13153	12796	8537	17944	13737	19334	10451	Xist	X	103460366	103483254	-	17946	lincRNA	inactive X specific transcripts [Source:MGI Symbol;Acc:MGI:98974]	-	-
ENSMUSG00000070436	15407	18335	14488	12019	18430	10798	9276	8489	11071	9168	10096	12179	11647	16999	17217	Serpinh1	7	99345376	99353239	-	2443	protein_coding	serine (or cysteine) peptidase inhibitor, clade H, member 1 [Source:MGI Symbol;Acc:MGI:88283]	-	-
ENSMUSG00000026728	19878	15940	13819	10550	11728	12204	10568	10594	11916	10737	11453	10615	15072	14644	15617	Vim	2	13573927	13582826	+	4743	protein_coding	vimentin [Source:MGI Symbol;Acc:MGI:98932]	-	-
ENSMUSG00000054452	12226	14165	14538	12831	12091	19119	14217	13462	15357	14101	11145	10356	8015	12768	10705	Aes	10	81559488	81566362	+	3334	protein_coding	amino-terminal enhancer of split [Source:MGI Symbol;Acc:MGI:95806]	-	-
ENSMUSG00000021477	5780	10053	6823	10389	12785	17941	22060	15117	19185	16512	5778	13657	11669	12226	14600	Ctsl	13	64359337	64370890	-	6489	protein_coding	cathepsin L [Source:MGI Symbol;Acc:MGI:88564]	-	-
ENSMUSG00000025130	11881	14233	13643	11859	12879	9846	12449	12283	12890	11840	15635	12374	11558	14035	16526	P4hb	11	120560298	120573253	-	2861	protein_coding	prolyl 4-hydroxylase, beta polypeptide [Source:MGI Symbol;Acc:MGI:97464]	-	-
ENSMUSG00000004980	7605	13968	11634	13707	14802	12256	10608	12035	11161	11977	8267	15372	14509	17407	16198	Hnrnpa2b1	6	51460932	51469894	-	6584	protein_coding	heterogeneous nuclear ribonucleoprotein A2/B1 [Source:MGI Symbol;Acc:MGI:104819]	-	-
ENSMUSG00000020048	11576	13645	13933	13151	12958	8118	10008	11764	10035	10664	19604	12751	12929	13363	16481	Hsp90b1	10	86690209	86705509	-	4032	protein_coding	heat shock protein 90, beta (Grp94), member 1 [Source:MGI Symbol;Acc:MGI:98817]	-	-
ENSMUSG00000026238	11015	13758	16444	15989	13356	10253	9204	8757	8861	9391	15069	14709	12919	15449	15488	Ptma	1	86526726	86530712	+	1462	protein_coding	prothymosin alpha [Source:MGI Symbol;Acc:MGI:97803]	-	-
ENSMUSG00000036667	7350	9222	12875	8093	13672	19476	13281	25058	18146	22112	5525	6575	10474	7771	10085	Tcaf1	6	42668002	42710088	-	9638	protein_coding	TRPM8 channel-associated factor 1 [Source:MGI Symbol;Acc:MGI:1914665]	-	-
ENSMUSG00000007892	8956	13691	11576	12498	13025	13193	11204	10018	10793	10693	10076	13718	14998	14129	16314	Rplp1	9	61913284	61914542	-	499	protein_coding	ribosomal protein, large, P1 [Source:MGI Symbol;Acc:MGI:1927099]	-	-
ENSMUSG00000033161	11325	12894	12738	11183	10888	8346	12709	13706	11698	13865	18519	10292	10111	9933	12014	Atp1a1	3	101576219	101604684	-	4568	protein_coding	ATPase, Na+/K+ transporting, alpha 1 polypeptide [Source:MGI Symbol;Acc:MGI:88105]	-	-
ENSMUSG00000020585	7851	11417	13152	10370	12079	11645	12719	13845	12473	14351	9983	10673	14474	10952	13831	Laptm4a	12	8921664	8938742	+	1773	protein_coding	lysosomal-associated protein transmembrane 4A [Source:MGI Symbol;Acc:MGI:108017]	-	-
ENSMUSG00000024107	5374	7542	15038	14145	9058	11740	14616	23186	16999	23391	9798	9392	4457	8911	4995	Lhcgr	17	88741549	88791976	-	2553	protein_coding	luteinizing hormone/choriogonadotropin receptor [Source:MGI Symbol;Acc:MGI:96783]	-	-
ENSMUSG00000001525	13820	13724	14236	14772	12622	6690	6283	5954	6814	6026	15574	14428	13582	14703	17101	Tubb5	17	35833921	35838306	-	3327	protein_coding	tubulin, beta 5 class I [Source:MGI Symbol;Acc:MGI:107812]	-	-
ENSMUSG00000051223	8356	14548	14642	15232	10745	7980	13019	10683	14849	11405	11630	10270	10825	10576	11269	Bzw1	1	58392898	58407353	+	4033	protein_coding	basic leucine zipper and W2 domains 1 [Source:MGI Symbol;Acc:MGI:1914132]	-	-
ENSMUSG00000047675	7488	13062	11500	13320	13140	11757	9200	9472	9908	9872	7848	13031	13976	14203	16136	Rps8	4	117153827	117156243	-	1726	protein_coding	ribosomal protein S8 [Source:MGI Symbol;Acc:MGI:98166]	-	-
ENSMUSG00000028495	7614	13097	12078	12906	11059	10263	9790	9628	10033	10122	9156	12995	14170	12774	17233	Rps6	4	86854660	86857412	-	1586	protein_coding	ribosomal protein S6 [Source:MGI Symbol;Acc:MGI:98159]	-	-
ENSMUSG00000012848	9150	11924	13482	12700	11780	10258	9791	9252	9141	9391	10484	11966	15823	10931	15889	Rps5	7	12922290	12926686	+	1734	protein_coding	ribosomal protein S5 [Source:MGI Symbol;Acc:MGI:1097682]	-	-
ENSMUSG00000019505	9140	11152	11184	10953	13390	13979	10798	12563	11618	12403	9163	10632	10016	11227	13150	Ubb	11	62551171	62553213	+	1675	protein_coding	ubiquitin B [Source:MGI Symbol;Acc:MGI:98888]	-	-
ENSMUSG00000029135	11207	11375	11137	10627	11226	8405	14691	12137	19450	11718	12055	11044	7108	9953	9172	Fosl2	5	32135801	32157842	+	9680	protein_coding	fos-like antigen 2 [Source:MGI Symbol;Acc:MGI:102858]	bZIP	bZIP
ENSMUSG00000028788	11237	12445	12525	11422	8995	8351	12333	14663	12826	13838	10355	8767	8862	10149	11506	Ptp4a2	4	129811219	129850003	+	4377	protein_coding	protein tyrosine phosphatase 4a2 [Source:MGI Symbol;Acc:MGI:1277117]	-	-
ENSMUSG00000001506	12008	14253	16112	7789	15133	9000	9998	6896	11192	7509	11231	7274	14607	11527	13595	Col1a1	11	94936224	94953042	+	6563	protein_coding	collagen, type I, alpha 1 [Source:MGI Symbol;Acc:MGI:88467]	-	-
ENSMUSG00000024608	8815	11517	13108	13086	10405	10380	10473	10342	9764	10010	9728	10920	14173	9692	14931	Rps14	18	60774510	60778546	+	1384	protein_coding	ribosomal protein S14 [Source:MGI Symbol;Acc:MGI:98107]	-	-
ENSMUSG00000039630	9294	12840	11180	11363	11444	8393	9828	10947	10714	10692	10671	11968	10870	12947	12736	Hnrnpu	1	178321108	178337797	-	11599	protein_coding	heterogeneous nuclear ribonucleoprotein U [Source:MGI Symbol;Acc:MGI:1858195]	-	-
ENSMUSG00000030744	8430	11018	11221	11259	12565	9630	11830	10877	10854	10690	9691	11950	11644	9670	14041	Rps3	7	99477896	99483738	-	4483	protein_coding	ribosomal protein S3 [Source:MGI Symbol;Acc:MGI:1350917]	-	-
ENSMUSG00000040111	14802	9098	8617	5979	10833	12180	14579	18984	13939	20583	5335	7775	5965	6746	8757	Gramd1b	9	40293233	40531383	-	10075	protein_coding	GRAM domain containing 1B [Source:MGI Symbol;Acc:MGI:1925037]	-	-
ENSMUSG00000020315	12103	10569	10364	9443	9655	7774	13467	13283	13458	13398	11457	10148	9338	9283	10403	Sptbn1	11	30099395	30268175	-	17492	protein_coding	spectrin beta, non-erythrocytic 1 [Source:MGI Symbol;Acc:MGI:98388]	-	-
ENSMUSG00000032294	13556	12856	11448	9451	11302	9725	10879	10721	11492	10658	11964	9129	6749	11595	11788	Pkm	9	59656368	59679375	+	5001	protein_coding	pyruvate kinase, muscle [Source:MGI Symbol;Acc:MGI:97591]	-	-
ENSMUSG00000050708	9908	10835	10817	9638	12191	15620	12662	10158	12741	11229	8085	9017	11255	9243	9866	Ftl1	7	45457944	45459884	-	1340	protein_coding	ferritin light polypeptide 1 [Source:MGI Symbol;Acc:MGI:95589]	-	-
ENSMUSG00000028691	5836	12506	12076	14171	10165	8519	9669	10982	10476	11810	6413	10590	12147	12556	14675	Prdx1	4	116685544	116700822	+	3043	protein_coding	peroxiredoxin 1 [Source:MGI Symbol;Acc:MGI:99523]	-	-
ENSMUSG00000000787	8014	9944	11292	10328	10320	6467	14619	13782	13456	13195	11994	9867	9584	8869	10807	Ddx3x	X	13280970	13294052	+	5277	protein_coding	DEAD/H (Asp-Glu-Ala-Asp/His) box polypeptide 3, X-linked [Source:MGI Symbol;Acc:MGI:103064]	-	-
ENSMUSG00000025809	10717	13508	12213	10458	10080	6203	11644	11158	11475	11333	12465	10753	9070	9866	11584	Itgb1	8	128685654	128733200	+	4081	protein_coding	integrin beta 1 (fibronectin receptor beta) [Source:MGI Symbol;Acc:MGI:96610]	-	-
ENSMUSG00000001119	8721	8899	9879	7574	10325	14575	14219	13932	16433	13244	8292	8344	10920	7879	9268	Col6a1	10	76708792	76726168	-	4380	protein_coding	collagen, type VI, alpha 1 [Source:MGI Symbol;Acc:MGI:88459]	-	-
ENSMUSG00000027184	12494	13522	11553	11145	8417	6227	11510	11615	12037	12505	11136	9689	7931	10107	11893	Caprin1	2	103762941	103797649	-	10219	protein_coding	cell cycle associated protein 1 [Source:MGI Symbol;Acc:MGI:1858234]	-	-
ENSMUSG00000002985	5789	9513	7068	9407	11961	17058	16055	14329	13201	15327	5740	10929	8054	7643	9621	Apoe	7	19696109	19699188	-	2138	protein_coding	apolipoprotein E [Source:MGI Symbol;Acc:MGI:88057]	-	-
ENSMUSG00000097415	10237	9539	11979	8469	15352	12240	8758	11216	12492	10917	6835	10840	11476	11064	8734	AU020206	7	75769038	75782099	-	3189	lincRNA	expressed sequence AU020206 [Source:MGI Symbol;Acc:MGI:2142134]	-	-
ENSMUSG00000025980	8258	15652	11012	13826	7991	6631	12128	12561	12708	12357	8819	10055	6719	10171	11159	Hspd1	1	55077835	55088243	-	2642	protein_coding	heat shock protein 1 (chaperonin) [Source:MGI Symbol;Acc:MGI:96242]	-	-
ENSMUSG00000029309	5724	10253	9353	6530	11372	11007	15514	12261	14967	12555	9471	8688	11694	9015	11631	Sparcl1	5	104079111	104113733	-	2937	protein_coding	SPARC-like 1 [Source:MGI Symbol;Acc:MGI:108110]	-	-
ENSMUSG00000093930	10168	15187	9729	15540	4751	8762	12957	15133	13768	16871	9138	7223	4307	10445	5647	Hmgcs1	13	119690379	119708260	+	4594	protein_coding	3-hydroxy-3-methylglutaryl-Coenzyme A synthase 1 [Source:MGI Symbol;Acc:MGI:107592]	-	-
ENSMUSG00000063450	14632	8703	8882	8277	13854	9100	10228	11948	9886	11405	11050	11414	8500	11121	10056	Syne2	12	75818134	76110926	+	26726	protein_coding	spectrin repeat containing, nuclear envelope 2 [Source:MGI Symbol;Acc:MGI:2449316]	-	-
ENSMUSG00000024222	10974	15603	12460	15183	7013	6405	9817	8070	12456	8555	14059	10769	5289	13279	8747	Fkbp5	17	28399094	28517527	-	9468	protein_coding	FK506 binding protein 5 [Source:MGI Symbol;Acc:MGI:104670]	-	-
ENSMUSG00000015837	10685	10820	9864	7943	12202	11167	11931	13233	13570	13872	6958	7680	9387	8062	10535	Sqstm1	11	50199366	50210827	-	3356	protein_coding	sequestosome 1 [Source:MGI Symbol;Acc:MGI:107931]	-	-
ENSMUSG00000006932	8794	11797	11255	10861	8400	5155	12001	11547	12182	11370	14498	10191	7499	10484	11313	Ctnnb1	9	120929216	120960507	+	5192	protein_coding	catenin (cadherin associated protein), beta 1 [Source:MGI Symbol;Acc:MGI:88276]	-	-
ENSMUSG00000032349	10007	11863	12733	13759	8584	7741	11225	13129	11507	12851	9193	10990	7087	8911	7563	Elovl5	9	77917364	77984519	+	3522	protein_coding	ELOVL family member 5, elongation of long chain fatty acids (yeast) [Source:MGI Symbol;Acc:MGI:1916051]	-	-
ENSMUSG00000035783	10794	15591	12262	9285	12497	6953	10558	6164	6036	6452	13757	8229	16484	9406	12421	Acta2	19	34241090	34255336	-	1781	protein_coding	actin, alpha 2, smooth muscle, aorta [Source:MGI Symbol;Acc:MGI:87909]	-	-
ENSMUSG00000059796	8783	13583	12233	13343	10464	8179	8268	8559	8719	8482	8999	11529	9153	13408	12824	Eif4a1	11	69666936	69672423	-	4334	protein_coding	eukaryotic translation initiation factor 4A1 [Source:MGI Symbol;Acc:MGI:95303]	-	-
ENSMUSG00000106106	14744	6043	7728	4944	16691	15728	18377	15080	8970	9085	11792	7787	5272	6437	6347	CT010467.1	17	39846353	39848827	-	2466	rRNA	18s RNA, related sequence 5	-	-
ENSMUSG00000041324	9382	4801	20129	10247	44550	509	891	8545	1510	1020	2980	10691	6031	10667	22281	Inhba	13	16011851	16031621	+	6390	protein_coding	inhibin beta-A [Source:MGI Symbol;Acc:MGI:96570]	-	-
ENSMUSG00000036523	6092	8399	11728	10655	16726	11211	8991	13796	11647	11212	8066	8620	7470	8604	8878	Greb1	12	16670615	16800886	-	9580	protein_coding	gene regulated by estrogen in breast cancer protein [Source:MGI Symbol;Acc:MGI:2149712]	-	-
ENSMUSG00000061904	6016	11704	9133	11123	9893	10707	10619	13045	10846	12354	6428	9322	8867	9466	11208	Slc25a3	10	91116574	91124059	-	5550	protein_coding	solute carrier family 25 (mitochondrial carrier, phosphate carrier), member 3 [Source:MGI Symbol;Acc:MGI:1353498]	-	-
ENSMUSG00000031447	6866	11320	10714	10033	8771	7667	12522	12938	12925	12850	9067	8881	8291	7841	9942	Lamp1	8	13159161	13175338	+	2675	protein_coding	lysosomal-associated membrane protein 1 [Source:MGI Symbol;Acc:MGI:96745]	-	-
ENSMUSG00000006800	11533	11303	10097	10114	13825	7752	7561	8061	7958	7410	7914	9568	9463	12329	15139	Sulf2	2	166073089	166155663	-	5871	protein_coding	sulfatase 2 [Source:MGI Symbol;Acc:MGI:1919293]	-	-
ENSMUSG00000028763	16035	11946	8465	7543	7626	8195	13522	11724	12951	11821	11598	7127	5318	7233	7431	Hspg2	4	137468769	137570630	+	14307	protein_coding	perlecan (heparan sulfate proteoglycan 2) [Source:MGI Symbol;Acc:MGI:96257]	-	-
ENSMUSG00000008668	7794	10178	9675	9895	11438	13153	8465	8950	8659	9162	6701	10902	10915	10768	11802	Rps18	17	33951999	33956001	-	2491	protein_coding	ribosomal protein S18 [Source:MGI Symbol;Acc:MGI:98146]	-	-
ENSMUSG00000034088	13151	10008	10293	8249	9000	6339	10643	11103	10602	10428	11856	8537	7923	8480	11591	Hdlbp	1	93405940	93478815	-	11320	protein_coding	high density lipoprotein (HDL) binding protein [Source:MGI Symbol;Acc:MGI:99256]	-	-
ENSMUSG00000026473	29532	8826	6228	4225	5187	11247	13765	12877	9118	13576	6883	5288	5552	7896	7602	Glul	1	153899944	153909723	+	3323	protein_coding	glutamate-ammonia ligase (glutamine synthetase) [Source:MGI Symbol;Acc:MGI:95739]	-	-
ENSMUSG00000025290	6157	10503	10356	11258	9850	7871	8887	8415	8413	9022	8301	11516	12008	10197	14948	Rps24	14	24487125	24496959	+	6256	protein_coding	ribosomal protein S24 [Source:MGI Symbol;Acc:MGI:98147]	-	-
ENSMUSG00000021546	6356	10375	8897	9576	11247	8128	9198	10656	9902	10068	8322	11348	10311	10852	12270	Hnrnpk	13	58391142	58403343	-	6466	protein_coding	heterogeneous nuclear ribonucleoprotein K [Source:MGI Symbol;Acc:MGI:99894]	-	-
ENSMUSG00000039202	21832	8384	7488	4143	5677	6331	18327	17849	16137	16175	8657	3180	4403	3534	5014	Abhd2	7	79273199	79365508	+	10573	protein_coding	abhydrolase domain containing 2 [Source:MGI Symbol;Acc:MGI:1914344]	-	-
ENSMUSG00000074340	38	200	13687	66	92	41	8444	50	50	21	88662	2181	31684	102	67	Ovgp1	3	105973711	105987423	+	3561	protein_coding	oviductal glycoprotein 1 [Source:MGI Symbol;Acc:MGI:106661]	-	-
ENSMUSG00000024164	1726	3819	32422	32146	5349	3886	12366	2309	3665	8186	22125	6143	6694	1957	2583	C3	17	57203970	57228136	-	5143	protein_coding	complement component 3 [Source:MGI Symbol;Acc:MGI:88227]	-	-
ENSMUSG00000021270	10877	13170	12793	12278	6990	4273	6476	6195	6694	6709	18373	9732	9872	10033	10858	Hsp90aa1	12	110690605	110702728	-	3931	protein_coding	heat shock protein 90, alpha (cytosolic), class A member 1 [Source:MGI Symbol;Acc:MGI:96250]	-	-
ENSMUSG00000092341	14469	6524	9406	4883	15567	16491	9447	10450	9974	10387	4464	9018	6394	11991	5309	Malat1	19	5795690	5802672	-	6983	lincRNA	metastasis associated lung adenocarcinoma transcript 1 (non-coding RNA) [Source:MGI Symbol;Acc:MGI:1919539]	-	-
ENSMUSG00000039218	11546	9255	9062	7398	10684	9922	9664	10519	10139	9804	9852	8647	8235	10717	8614	Srrm2	17	23790532	23824741	+	12842	protein_coding	serine/arginine repetitive matrix 2 [Source:MGI Symbol;Acc:MGI:1923206]	-	-
ENSMUSG00000040562	5201	4790	6488	4512	9293	19611	11903	18604	12352	18083	4821	5490	7644	4996	8370	Gstm2	3	107981702	107986453	-	1679	protein_coding	glutathione S-transferase, mu 2 [Source:MGI Symbol;Acc:MGI:95861]	-	-
ENSMUSG00000045128	6753	9257	10167	10739	11200	10325	7908	7487	7738	7817	7620	10419	12694	9568	12390	Rpl18a	8	70894722	70897412	-	1739	protein_coding	ribosomal protein L18A [Source:MGI Symbol;Acc:MGI:1924058]	-	-
ENSMUSG00000020612	8622	9768	9324	8146	9262	7425	11070	13109	11146	12415	8075	7972	8007	7556	10175	Prkar1a	11	109649405	109669656	+	4321	protein_coding	protein kinase, cAMP dependent regulatory, type I, alpha [Source:MGI Symbol;Acc:MGI:104878]	-	-
ENSMUSG00000071644	8073	11357	9275	9413	9074	7311	8723	8512	9204	8628	9157	9979	9267	9863	13211	Eef1g	19	8967041	8978479	+	2600	protein_coding	eukaryotic translation elongation factor 1 gamma [Source:MGI Symbol;Acc:MGI:1914410]	-	-
ENSMUSG00000026234	10478	10245	10877	9829	8729	6672	6666	7386	7119	7578	11888	9878	9786	11698	12127	Ncl	1	86344719	86359400	-	10188	protein_coding	nucleolin [Source:MGI Symbol;Acc:MGI:97286]	-	-
ENSMUSG00000049775	6038	12289	9957	9002	7651	8215	10500	6214	7285	8030	11006	10128	14220	8523	10237	Tmsb4x	X	167207093	167209315	-	1371	protein_coding	thymosin, beta 4, X chromosome [Source:MGI Symbol;Acc:MGI:99510]	-	-
ENSMUSG00000016559	6167	9981	9762	11274	10169	6978	8197	9409	7525	8218	8207	10544	10025	10479	11835	H3f3b	11	116021912	116027962	-	2976	protein_coding	H3 histone, family 3B [Source:MGI Symbol;Acc:MGI:1101768]	-	-
ENSMUSG00000020368	8231	10343	10375	10099	8730	5100	9276	10410	9366	9726	10538	9272	8402	7607	10812	Canx	11	50293961	50325673	-	4693	protein_coding	calnexin [Source:MGI Symbol;Acc:MGI:88261]	-	-
ENSMUSG00000071866	4397	12444	6708	8292	11657	12539	8850	9411	8984	10992	6431	7880	9021	11713	8424	Ppia	11	6415443	6419817	+	3508	protein_coding	peptidylprolyl isomerase A [Source:MGI Symbol;Acc:MGI:97749]	-	-
ENSMUSG00000015932	8038	10448	11102	8007	10332	6051	9496	8900	9017	8887	10467	7714	11667	7386	10112	Dstn	2	143915320	143943324	+	1911	protein_coding	destrin [Source:MGI Symbol;Acc:MGI:1929270]	-	-
ENSMUSG00000075254	13444	14133	7793	11473	4170	5387	10734	10084	9203	9766	10097	7386	3463	12287	7338	Heg1	16	33684370	33771576	+	12728	protein_coding	heart development protein with EGF-like domains 1 [Source:MGI Symbol;Acc:MGI:1924696]	-	-
ENSMUSG00000046364	6191	9411	9079	10363	10408	10336	7537	7824	7928	8057	6165	10718	9729	10585	12348	Rpl27a	7	109519147	109522367	+	2774	protein_coding	ribosomal protein L27A [Source:MGI Symbol;Acc:MGI:1347076]	-	-
ENSMUSG00000037805	8391	9498	9741	9343	9587	7599	8375	7361	8393	7520	9568	9749	10043	9138	11782	Rpl10a	17	28328471	28331033	+	2431	protein_coding	ribosomal protein L10A [Source:MGI Symbol;Acc:MGI:1343877]	-	-
ENSMUSG00000038900	6821	9415	9124	10084	9284	9069	6733	6508	6874	7255	6486	9823	12960	11736	13155	Rpl12	2	32961559	32965345	+	3598	protein_coding	ribosomal protein L12 [Source:MGI Symbol;Acc:MGI:98002]	-	-
ENSMUSG00000015243	30942	11795	7160	6934	4684	5393	10727	9911	8544	9471	5558	6269	4952	6259	6639	Abca1	4	53030787	53159895	-	10363	protein_coding	ATP-binding cassette, sub-family A (ABC1), member 1 [Source:MGI Symbol;Acc:MGI:99607]	-	-
ENSMUSG00000017404	7717	9227	10362	9341	8977	10118	7508	7779	7679	7841	6958	8984	10273	9867	12557	Rpl19	11	98026710	98030492	+	1022	protein_coding	ribosomal protein L19 [Source:MGI Symbol;Acc:MGI:98020]	-	-
ENSMUSG00000003970	6809	8610	7988	7868	11041	9413	9928	9660	9708	9200	7811	9751	8034	8276	11078	Rpl8	15	76904078	76906314	+	1359	protein_coding	ribosomal protein L8 [Source:MGI Symbol;Acc:MGI:1350927]	-	-
ENSMUSG00000058655	8162	8867	9087	8063	8340	6082	9267	9243	9318	8460	11897	10183	8603	8321	10960	Eif4b	15	102073773	102097173	+	4468	protein_coding	eukaryotic translation initiation factor 4B [Source:MGI Symbol;Acc:MGI:95304]	-	-
ENSMUSG00000016534	8842	9422	9369	7484	7197	6588	11469	10461	10707	10964	9434	7025	8569	7126	9199	Lamp2	X	38401357	38456454	-	9552	protein_coding	lysosomal-associated membrane protein 2 [Source:MGI Symbol;Acc:MGI:96748]	-	-
ENSMUSG00000022884	4788	9505	7409	8492	8660	8337	9306	9356	9206	10099	6709	10252	10214	10206	11069	Eif4a2	16	23107444	23114136	+	5338	protein_coding	eukaryotic translation initiation factor 4A2 [Source:MGI Symbol;Acc:MGI:106906]	-	-
ENSMUSG00000006333	5363	8704	8311	8584	10839	9141	9090	8834	8150	7873	8194	10409	9117	8632	11644	Rps9	7	3703993	3706897	+	2522	protein_coding	ribosomal protein S9 [Source:MGI Symbol;Acc:MGI:1924096]	-	-
ENSMUSG00000025151	8184	8571	9367	8236	10291	7513	7302	8853	8535	7979	10103	8991	8748	9000	10707	Maged1	X	94535474	94542143	-	4351	protein_coding	melanoma antigen, family D, 1 [Source:MGI Symbol;Acc:MGI:1930187]	-	-
ENSMUSG00000019929	3769	6785	9130	6734	5000	9864	13394	11102	12001	12124	10688	7893	9442	5724	8661	Dcn	10	97479609	97518143	+	5838	protein_coding	decorin [Source:MGI Symbol;Acc:MGI:94872]	-	-
ENSMUSG00000036256	5279	8057	7563	6213	11280	13714	10247	10086	10169	10516	3928	7495	10078	7945	9590	Igfbp7	5	77349240	77408041	-	1209	protein_coding	insulin-like growth factor binding protein 7 [Source:MGI Symbol;Acc:MGI:1352480]	-	-
ENSMUSG00000022961	9018	8624	8271	7512	8981	8267	9870	9429	9480	9503	8362	8000	7953	9500	8791	Son	16	91647506	91679221	+	14907	protein_coding	Son DNA binding protein [Source:MGI Symbol;Acc:MGI:98353]	-	-
ENSMUSG00000021910	8537	8823	8609	7797	8825	9178	8763	8990	9080	8970	9025	7473	7879	8444	8564	Nisch	14	31170930	31216946	-	13198	protein_coding	nischarin [Source:MGI Symbol;Acc:MGI:1928323]	-	-
ENSMUSG00000061477	5284	9316	9143	10260	9023	7902	7435	7149	7439	7333	6419	9581	12262	8819	11426	Rps7	12	28630854	28635953	-	2015	protein_coding	ribosomal protein S7 [Source:MGI Symbol;Acc:MGI:1333818]	-	-
ENSMUSG00000055065	5733	8115	6641	7377	10592	10070	9526	9255	9309	9292	6495	9725	8057	9791	8563	Ddx17	15	79527736	79546741	-	7643	protein_coding	DEAD (Asp-Glu-Ala-Asp) box polypeptide 17 [Source:MGI Symbol;Acc:MGI:1914290]	-	-
ENSMUSG00000001924	8632	9428	8692	7740	7770	7373	9079	10601	10021	10067	8295	7325	6556	7506	9262	Uba1	X	20658326	20683179	+	4819	protein_coding	ubiquitin-like modifier activating enzyme 1 [Source:MGI Symbol;Acc:MGI:98890]	-	-
ENSMUSG00000031503	12569	11834	8515	7259	9905	6348	8240	6788	7979	6913	7667	7997	7925	9493	8864	Col4a2	8	11312805	11449287	+	6619	protein_coding	collagen, type IV, alpha 2 [Source:MGI Symbol;Acc:MGI:88455]	-	-
ENSMUSG00000029455	4930	4534	5549	4207	8118	13482	13883	17087	12951	15412	5506	6677	5035	4363	6314	Aldh2	5	121566027	121593824	-	5126	protein_coding	aldehyde dehydrogenase 2, mitochondrial [Source:MGI Symbol;Acc:MGI:99600]	-	-
ENSMUSG00000024393	9285	8349	7419	6870	8736	6459	10751	10984	10424	10222	10158	7161	5562	6530	8032	Prrc2a	17	35149076	35164897	-	7631	protein_coding	proline-rich coiled-coil 2A [Source:MGI Symbol;Acc:MGI:1915467]	-	-
ENSMUSG00000060938	6086	8826	9739	10180	8616	7440	6609	6435	6325	6780	6067	9213	11580	9900	13042	Rpl26	11	68901583	68906989	+	1444	protein_coding	ribosomal protein L26 [Source:MGI Symbol;Acc:MGI:106022]	-	-
ENSMUSG00000039952	7227	7965	8699	6907	11102	5153	9113	9136	10023	7800	9145	7569	7236	7275	12342	Dag1	9	108204634	108263958	-	6357	protein_coding	dystroglycan 1 [Source:MGI Symbol;Acc:MGI:101864]	-	-
ENSMUSG00000027828	6014	8325	9119	7994	9044	6027	9254	9909	8564	9290	7681	8240	9661	6966	9728	Ssr3	3	65379655	65392623	-	4172	protein_coding	signal sequence receptor, gamma [Source:MGI Symbol;Acc:MGI:1914687]	-	-
ENSMUSG00000063524	8313	8631	8916	7363	10804	6424	6880	8711	7348	7600	9870	6513	7215	9435	11354	Eno1	4	150236721	150248879	+	5379	protein_coding	enolase 1, alpha non-neuron [Source:MGI Symbol;Acc:MGI:95393]	-	-
ENSMUSG00000024740	10177	8524	8786	6560	8495	4724	7879	8447	8468	7741	11357	8758	7154	7402	10729	Ddb1	19	10605625	10629813	+	4155	protein_coding	damage specific DNA binding protein 1 [Source:MGI Symbol;Acc:MGI:1202384]	-	-
ENSMUSG00000020849	5237	10102	8827	10310	8150	6446	7066	7910	7681	8006	6722	8831	9559	8724	11367	Ywhae	11	75732869	75765845	+	2568	protein_coding	tyrosine 3-monooxygenase/tryptophan 5-monooxygenase activation protein, epsilon polypeptide [Source:MGI Symbol;Acc:MGI:894689]	-	-
ENSMUSG00000001175	7697	9440	11649	9953	10705	5442	5502	6181	5414	6013	11563	8272	8682	8661	9706	Calm1	12	100199435	100209814	+	4706	protein_coding	calmodulin 1 [Source:MGI Symbol;Acc:MGI:88251]	-	-
ENSMUSG00000022285	7997	9539	10194	9646	8517	6683	7316	7365	7364	7624	9364	7951	8904	7928	8211	Ywhaz	15	36770770	36796929	-	4118	protein_coding	tyrosine 3-monooxygenase/tryptophan 5-monooxygenase activation protein, zeta polypeptide [Source:MGI Symbol;Acc:MGI:109484]	-	-
ENSMUSG00000019132	9131	9605	10083	8335	8212	5697	8443	8315	9202	7907	7571	6824	8348	8622	8167	BC005537	13	24801657	24816197	+	5849	protein_coding	cDNA sequence BC005537 [Source:MGI Symbol;Acc:MGI:2441726]	-	-
ENSMUSG00000020473	5971	10520	9811	11569	9328	5737	7920	8100	9325	8016	7667	9880	6264	7288	6712	Aebp1	11	5861947	5872088	+	4058	protein_coding	AE binding protein 1 [Source:MGI Symbol;Acc:MGI:1197012]	-	-
ENSMUSG00000032374	6197	7444	8068	7664	12249	7153	7916	10892	9352	10716	3441	7290	9209	6804	9580	Plod2	9	92542223	92608428	+	5392	protein_coding	procollagen lysine, 2-oxoglutarate 5-dioxygenase 2 [Source:MGI Symbol;Acc:MGI:1347007]	-	-
ENSMUSG00000031375	7804	10840	10051	7554	8352	6048	8227	6177	8434	6793	8020	7123	10295	8066	10005	Bgn	X	73483602	73495933	+	6099	protein_coding	biglycan [Source:MGI Symbol;Acc:MGI:88158]	-	-
ENSMUSG00000028452	7470	8644	8151	7737	8071	6460	8243	9472	8424	9834	9169	8023	6807	7569	9678	Vcp	4	42979963	43000507	-	4851	protein_coding	valosin containing protein [Source:MGI Symbol;Acc:MGI:99919]	-	-
ENSMUSG00000025261	10026	8346	7883	6950	7993	6249	8983	9515	8818	9481	9934	7059	6459	8171	7541	Huwe1	X	151800807	151935417	+	23507	protein_coding	HECT, UBA and WWE domain containing 1 [Source:MGI Symbol;Acc:MGI:1926884]	-	-
ENSMUSG00000037706	7542	8596	8092	6718	8419	9953	9144	9354	9185	9845	7345	6317	6700	7475	8270	Cd81	7	143052739	143067934	+	2879	protein_coding	CD81 antigen [Source:MGI Symbol;Acc:MGI:1096398]	-	-
ENSMUSG00000047126	8614	9327	8848	8112	6442	3932	9356	10002	9471	9513	10545	7098	6789	6094	8469	Cltc	11	86694351	86757565	-	8499	protein_coding	clathrin, heavy polypeptide (Hc) [Source:MGI Symbol;Acc:MGI:2388633]	-	-
ENSMUSG00000023010	6454	8204	8174	7278	7628	7483	9775	9948	10062	10080	9419	6836	6912	6543	7446	Tmbim6	15	99392882	99410049	+	4578	protein_coding	transmembrane BAX inhibitor motif containing 6 [Source:MGI Symbol;Acc:MGI:99682]	-	-
ENSMUSG00000030057	5902	8525	8889	8448	7470	7389	8047	8521	7852	8308	7541	7898	8587	8775	9656	Cnbp	6	87842615	87851106	-	3036	protein_coding	cellular nucleic acid binding protein [Source:MGI Symbol;Acc:MGI:88431]	-	-
ENSMUSG00000064373	7539	7046	7225	5625	6503	6941	10789	9800	9706	10190	8990	8169	8174	5652	9317	Selenop	15	3268547	3280508	+	2842	protein_coding	selenoprotein P [Source:MGI Symbol;Acc:MGI:894288]	-	-
ENSMUSG00000057113	7804	8870	8573	8930	7663	5239	5079	5042	5194	5278	9050	10286	10771	11203	12324	Npm1	11	33152287	33163206	-	2665	protein_coding	nucleophosmin 1 [Source:MGI Symbol;Acc:MGI:106184]	-	-
ENSMUSG00000006699	6008	9869	7981	8870	6797	6505	8992	8986	9005	8877	7596	7757	6886	7627	8748	Cdc42	4	137319696	137357720	-	2966	protein_coding	cell division cycle 42 [Source:MGI Symbol;Acc:MGI:106211]	-	-
ENSMUSG00000056201	7091	8590	8428	7931	10222	10622	7011	7450	7031	7333	6075	7848	7708	8380	8491	Cfl1	19	5490455	5495201	+	2354	protein_coding	cofilin 1, non-muscle [Source:MGI Symbol;Acc:MGI:101757]	-	-
ENSMUSG00000038615	7209	7008	7759	6031	10245	6380	9780	11843	9853	10824	7123	6801	5515	5609	8044	Nfe2l1	11	96817414	96829968	-	5441	protein_coding	nuclear factor, erythroid derived 2,-like 1 [Source:MGI Symbol;Acc:MGI:99421]	bZIP	bZIP
ENSMUSG00000026185	5582	7425	5444	4274	6218	10488	10380	9617	12857	9966	11761	6695	7159	5652	5673	Igfbp5	1	72857932	72874884	-	6006	protein_coding	insulin-like growth factor binding protein 5 [Source:MGI Symbol;Acc:MGI:96440]	-	-
ENSMUSG00000048078	10135	6245	7487	9270	9102	3213	4637	5689	4801	4871	14121	11560	8225	8007	11321	Tenm4	7	96171246	96911093	+	21021	protein_coding	teneurin transmembrane protein 4 [Source:MGI Symbol;Acc:MGI:2447063]	-	-
ENSMUSG00000040997	8377	8346	9419	9529	5497	8406	8728	9009	8489	9498	7617	7181	5186	7126	6137	Abhd4	14	54254188	54270637	+	3279	protein_coding	abhydrolase domain containing 4 [Source:MGI Symbol;Acc:MGI:1915938]	-	-
ENSMUSG00000018707	11574	7327	7721	6461	7462	6099	8405	9119	8483	8509	11331	6640	5431	6167	7339	Dync1h1	12	110601452	110666945	+	15658	protein_coding	dynein cytoplasmic 1 heavy chain 1 [Source:MGI Symbol;Acc:MGI:103147]	-	-
ENSMUSG00000026751	5789	4740	6201	4218	10314	12416	9812	15829	9747	13222	3123	5907	5712	4444	6321	Nr5a1	2	38692656	38714542	-	4241	protein_coding	nuclear receptor subfamily 5, group A, member 1 [Source:MGI Symbol;Acc:MGI:1346833]	-	-
ENSMUSG00000022892	6813	8496	8323	7163	7186	6078	9070	8167	9071	8140	9081	7472	8271	6471	7820	App	16	84949685	85173766	-	12996	protein_coding	amyloid beta (A4) precursor protein [Source:MGI Symbol;Acc:MGI:88059]	-	-
ENSMUSG00000025982	6147	7860	7776	7355	7973	8170	7149	7511	7722	8027	6952	8322	8576	9088	8861	Sf3b1	1	54985169	55027481	-	11370	protein_coding	splicing factor 3b, subunit 1 [Source:MGI Symbol;Acc:MGI:1932339]	-	-
ENSMUSG00000027620	5363	8136	7298	7047	7832	7853	7014	7264	7234	7970	5868	9023	9680	10029	8973	Rbm39	2	156147239	156180238	-	6946	protein_coding	RNA binding motif protein 39 [Source:MGI Symbol;Acc:MGI:2157953]	-	-
ENSMUSG00000006205	6282	10225	9394	10239	10435	4730	6167	6121	6965	4976	5455	7320	7166	8824	12154	Htra1	7	130936111	130985660	+	2879	protein_coding	HtrA serine peptidase 1 [Source:MGI Symbol;Acc:MGI:1929076]	-	-
ENSMUSG00000028692	5477	7698	7454	7264	7926	7872	8511	9398	9274	9238	6736	7076	6723	7099	8452	Akr1a1	4	116636510	116651680	-	2750	protein_coding	aldo-keto reductase family 1, member A1 (aldehyde reductase) [Source:MGI Symbol;Acc:MGI:1929955]	-	-
ENSMUSG00000010663	7446	5659	6975	5926	5352	10467	11326	16050	9683	14972	5495	4492	3800	4325	4181	Fads1	19	10182888	10196870	+	3456	protein_coding	fatty acid desaturase 1 [Source:MGI Symbol;Acc:MGI:1923517]	-	-
ENSMUSG00000031099	16790	10414	6223	6019	4288	3981	7571	9923	8100	9788	4723	4692	3881	9831	9191	Smarca1	X	47809368	47892974	-	6118	protein_coding	SWI/SNF related, matrix associated, actin dependent regulator of chromatin, subfamily a, member 1 [Source:MGI Symbol;Acc:MGI:1935127]	SNF2	SNF2
ENSMUSG00000064337	17798	5814	12873	6068	5456	10095	4602	5822	5615	7038	7652	5588	8090	5591	6741	mt-Rnr1	MT	70	1024	+	955	Mt_rRNA	mitochondrially encoded 12S rRNA [Source:MGI Symbol;Acc:MGI:102493]	-	-
ENSMUSG00000022443	12794	7013	8531	5317	8296	5306	8700	8047	8849	7714	11087	5652	6109	5177	6146	Myh9	15	77760587	77842175	-	12928	protein_coding	myosin, heavy polypeptide 9, non-muscle [Source:MGI Symbol;Acc:MGI:107717]	-	-
ENSMUSG00000023175	6636	6891	7564	6242	8056	8625	8428	8749	8604	8806	8568	6411	5904	6493	8535	Bsg	10	79704491	79711969	+	1814	protein_coding	basigin [Source:MGI Symbol;Acc:MGI:88208]	-	-
ENSMUSG00000020917	8074	8844	6592	7402	4550	4826	11405	13483	9700	12124	6645	5066	3244	6447	6040	Acly	11	100476353	100528000	-	5279	protein_coding	ATP citrate lyase [Source:MGI Symbol;Acc:MGI:103251]	-	-
ENSMUSG00000028530	7688	7410	8133	8498	10160	4406	6418	7172	6651	6197	7062	8858	5961	8117	10904	Jak1	4	101152367	101265282	-	7227	protein_coding	Janus kinase 1 [Source:MGI Symbol;Acc:MGI:96628]	-	-
ENSMUSG00000037815	6680	8737	8400	8426	7895	5660	6910	7732	7580	7595	8518	7165	5991	7827	7896	Ctnna1	18	35118888	35254773	+	3698	protein_coding	catenin (cadherin associated protein), alpha 1 [Source:MGI Symbol;Acc:MGI:88274]	-	-
ENSMUSG00000030122	5717	7854	6641	6206	10068	12767	7308	7569	7228	7988	3670	5872	8426	7114	8272	Ptms	6	124913681	124920103	-	1619	protein_coding	parathymosin [Source:MGI Symbol;Acc:MGI:1916452]	-	-
ENSMUSG00000042712	6025	6518	6391	5332	9192	5917	8816	9566	8640	9475	4319	7393	7147	7141	10709	Tceal9	X	136245079	136247139	+	1037	protein_coding	transcription elongation factor A like 9 [Source:MGI Symbol;Acc:MGI:109567]	-	-
ENSMUSG00000006373	7589	8212	6937	5965	6015	8581	8965	10684	8044	10632	4524	5671	6608	6674	7206	Pgrmc1	X	36598206	36606079	+	1857	protein_coding	progesterone receptor membrane component 1 [Source:MGI Symbol;Acc:MGI:1858305]	-	-
ENSMUSG00000008540	7639	9201	6402	5709	6469	8932	8978	8805	9711	9611	4269	5706	5776	7301	7502	Mgst1	6	138140316	138156755	+	2013	protein_coding	microsomal glutathione S-transferase 1 [Source:MGI Symbol;Acc:MGI:1913850]	-	-
ENSMUSG00000025780	6282	4103	6068	4689	6869	6097	10491	11638	10010	10917	6401	7328	9464	4116	7078	Itih5	2	10153571	10256529	+	7900	protein_coding	inter-alpha (globulin) inhibitor H5 [Source:MGI Symbol;Acc:MGI:1925751]	-	-
ENSMUSG00000026249	4955	5692	7288	9127	15818	2525	1827	2511	2026	1394	5876	13014	9923	11413	18094	Serpine2	1	79794197	79861180	-	8287	protein_coding	serine (or cysteine) peptidase inhibitor, clade E, member 2 [Source:MGI Symbol;Acc:MGI:101780]	-	-
ENSMUSG00000022180	6224	4859	5962	3501	6156	9949	11506	15738	10982	16677	3305	3886	4554	3263	4858	Slc7a8	14	54722209	54781946	-	5005	protein_coding	solute carrier family 7 (cationic amino acid transporter, y+ system), member 8 [Source:MGI Symbol;Acc:MGI:1355323]	-	-
ENSMUSG00000001794	5668	8449	8464	7715	7386	9387	6914	7370	7347	7964	4582	5950	7606	7732	8233	Capns1	7	30186936	30198811	-	2477	protein_coding	calpain, small subunit 1 [Source:MGI Symbol;Acc:MGI:88266]	-	-
ENSMUSG00000040152	7250	8443	7286	7933	8985	2626	4839	4244	4397	3433	6231	12377	11815	8951	11183	Thbs1	2	118111876	118127133	+	6073	protein_coding	thrombospondin 1 [Source:MGI Symbol;Acc:MGI:98737]	-	-
ENSMUSG00000021218	8275	7479	9042	7381	5984	4647	6399	6635	6424	6550	9262	6904	8409	7087	9127	Gdi2	13	3538063	3567871	+	10558	protein_coding	guanosine diphosphate (GDP) dissociation inhibitor 2 [Source:MGI Symbol;Acc:MGI:99845]	-	-
ENSMUSG00000029718	5517	9326	7145	6771	6782	11130	7240	7944	8962	8294	3540	5566	5256	8817	7098	Pcolce	5	137605103	137613784	-	3823	protein_coding	procollagen C-endopeptidase enhancer protein [Source:MGI Symbol;Acc:MGI:105099]	-	-
ENSMUSG00000029767	8080	9420	7702	6348	7288	4140	7352	7657	6814	7366	6957	6627	5957	7283	9455	Calu	6	29348069	29377110	+	4663	protein_coding	calumenin [Source:MGI Symbol;Acc:MGI:1097158]	-	-
ENSMUSG00000031799	6789	10654	8507	7909	6670	5349	6633	6208	6730	6572	5757	6474	8725	7925	7347	Tpm4	8	72134975	72153142	+	2203	protein_coding	tropomyosin 4 [Source:MGI Symbol;Acc:MGI:2449202]	-	-
ENSMUSG00000025823	6990	7895	12352	5161	12518	3227	5096	3892	7618	3757	8883	4634	10767	6724	8628	Pdia4	6	47796141	47813430	-	2399	protein_coding	protein disulfide isomerase associated 4 [Source:MGI Symbol;Acc:MGI:104864]	-	-
ENSMUSG00000069662	6107	6646	7414	6100	8818	5865	6604	9086	7456	8329	5846	6771	8554	6605	7666	Marcks	10	37133375	37138920	-	4048	protein_coding	myristoylated alanine rich protein kinase C substrate [Source:MGI Symbol;Acc:MGI:96907]	-	-
ENSMUSG00000028465	10298	7733	7032	5276	7219	6203	8113	8323	7812	8030	7485	5780	5405	6130	6829	Tln1	4	43531519	43562691	-	9801	protein_coding	talin 1 [Source:MGI Symbol;Acc:MGI:1099832]	-	-
ENSMUSG00000024087	7571	7514	8130	7724	7399	4934	6906	5994	6162	5563	6733	7906	8133	7502	9391	Cyp1b1	17	79706953	79715041	-	5128	protein_coding	cytochrome P450, family 1, subfamily b, polypeptide 1 [Source:MGI Symbol;Acc:MGI:88590]	-	-
ENSMUSG00000028649	8364	6942	6441	6032	7568	6121	8404	8628	7873	8487	7036	6490	5504	6941	6540	Macf1	4	123349633	123684360	-	31402	protein_coding	microtubule-actin crosslinking factor 1 [Source:MGI Symbol;Acc:MGI:108559]	-	-
ENSMUSG00000023886	3182	2287	5093	3029	9490	6704	11114	16790	13151	12381	2412	5249	6510	2822	6639	Smoc2	17	14279506	14404790	+	6951	protein_coding	SPARC related modular calcium binding 2 [Source:MGI Symbol;Acc:MGI:1929881]	-	-
ENSMUSG00000060802	5393	7445	8610	8449	7208	7271	7730	7047	6313	7791	3718	7734	8072	6348	7391	B2m	2	122147686	122153083	+	860	protein_coding	beta-2 microglobulin [Source:MGI Symbol;Acc:MGI:88127]	-	-
ENSMUSG00000037266	2531	7490	4944	6183	8998	11970	6824	6615	7029	8008	2536	8507	7735	9931	6816	Rsrp1	4	134923592	134927671	+	3349	protein_coding	arginine/serine rich protein 1 [Source:MGI Symbol;Acc:MGI:106498]	-	-
ENSMUSG00000030062	7334	5981	7301	5306	8617	7839	7040	8386	6813	8326	7295	5909	6160	5739	7433	Rpn1	6	88084482	88105304	+	4512	protein_coding	ribophorin I [Source:MGI Symbol;Acc:MGI:98084]	-	-
ENSMUSG00000025794	4344	7680	6056	8202	6794	8217	5602	5988	5641	6116	4539	8130	8990	8694	10102	Rpl14	9	120571444	120574654	+	1651	protein_coding	ribosomal protein L14 [Source:MGI Symbol;Acc:MGI:1914365]	-	-
ENSMUSG00000038014	6611	7521	6801	6984	6157	5343	7383	7512	7291	7204	7336	6541	7295	7382	7657	Fam120a	13	48879219	48968017	-	5105	protein_coding	family with sequence similarity 120, member A [Source:MGI Symbol;Acc:MGI:2446163]	-	-
ENSMUSG00000004044	6684	6337	6666	4728	7347	6600	9877	10894	8316	10110	6666	4661	5319	4281	6499	Cavin1	11	100956733	100970887	-	3587	protein_coding	caveolae associated 1 [Source:MGI Symbol;Acc:MGI:1277968]	-	-
ENSMUSG00000063870	8346	6948	6602	6019	6521	5505	7143	7391	7344	6599	8768	6540	6128	6980	8054	Chd4	6	125095981	125130591	+	8019	protein_coding	chromodomain helicase DNA binding protein 4 [Source:MGI Symbol;Acc:MGI:1344380]	PHD	PHD
ENSMUSG00000029810	5274	7063	7796	5963	6167	7350	7764	7722	7941	8423	6593	6512	7081	5626	7352	Tmem176b	6	48833818	48841496	-	2371	protein_coding	transmembrane protein 176B [Source:MGI Symbol;Acc:MGI:1916348]	-	-
ENSMUSG00000032366	5103	9137	6229	5513	7474	6261	8378	6176	7087	6586	7286	6624	7038	7385	8193	Tpm1	9	67022590	67049406	-	6485	protein_coding	tropomyosin 1, alpha [Source:MGI Symbol;Acc:MGI:98809]	-	-
ENSMUSG00000063015	8763	7261	8618	6987	6561	4040	6679	7041	6642	6513	9032	6300	6345	5941	7606	Ccni	5	93181933	93206495	-	3303	protein_coding	cyclin I [Source:MGI Symbol;Acc:MGI:1341077]	-	-
ENSMUSG00000059070	4806	8041	7319	7587	8116	7645	6548	6379	5955	6059	5585	7260	8069	6431	8514	Rpl18	7	45715457	45720836	+	4043	protein_coding	ribosomal protein L18 [Source:MGI Symbol;Acc:MGI:98003]	-	-
ENSMUSG00000009927	5529	7564	7259	8025	7268	7666	5797	5564	5564	6094	4684	7199	8235	8405	9386	Rps25	9	44407139	44410427	+	2691	protein_coding	ribosomal protein S25 [Source:MGI Symbol;Acc:MGI:1922867]	-	-
ENSMUSG00000005417	7182	6880	7253	6797	7100	6021	7365	6768	7462	6702	8028	7009	5593	6449	7366	Mprip	11	59661305	59780860	+	13327	protein_coding	myosin phosphatase Rho interacting protein [Source:MGI Symbol;Acc:MGI:1349438]	-	-
ENSMUSG00000034160	4418	6809	5837	6132	7704	7847	6267	5802	6607	6491	4343	9253	8883	10424	7019	Ogt	X	101640060	101684351	+	8045	protein_coding	O-linked N-acetylglucosamine (GlcNAc) transferase (UDP-N-acetylglucosamine:polypeptide-N-acetylglucosaminyl transferase) [Source:MGI Symbol;Acc:MGI:1339639]	-	-
novel.313	10787	15363	7712	5506	4305	3980	13276	8592	7480	7938	4649	2365	4341	3108	4415	-	14	32115304	32120539	-	5236	-	- && sp|P03330|GAG_WMSV Gag polyprotein OS=Woolly monkey sarcoma virus OX=11970 GN=gag PE=3 SV=4 && PF01140:Matrix protein (MA), p15	-	-
ENSMUSG00000037563	4964	6637	6699	6751	8440	8627	6682	6555	6353	6117	5289	7543	8129	6972	8043	Rps16	7	28350652	28353155	+	1266	protein_coding	ribosomal protein S16 [Source:MGI Symbol;Acc:MGI:98118]	-	-
ENSMUSG00000068823	6978	7981	7725	7062	5908	4398	7072	7283	7123	7352	7788	6794	6074	6763	7347	Csde1	3	103020426	103058186	+	10902	protein_coding	cold shock domain containing E1, RNA binding [Source:MGI Symbol;Acc:MGI:92356]	CSD	CSD
ENSMUSG00000025362	3913	7988	6791	8449	7070	6507	6464	6065	6466	5995	5157	7973	7448	7181	9562	Rps26	10	128624534	128626747	-	1544	protein_coding	ribosomal protein S26 [Source:MGI Symbol;Acc:MGI:1351628]	-	-
ENSMUSG00000020029	6296	6887	6694	5824	5731	6306	8262	7277	8977	7202	8633	5628	6388	6362	6454	Nudt4	10	95547007	95564146	-	3210	protein_coding	nudix (nucleoside diphosphate linked moiety X)-type motif 4 [Source:MGI Symbol;Acc:MGI:1918457]	-	-
ENSMUSG00000007891	4574	7848	7454	7045	6017	6696	8399	7302	7411	8013	6365	6011	6014	6071	7409	Ctsd	7	142375911	142388038	-	2351	protein_coding	cathepsin D [Source:MGI Symbol;Acc:MGI:88562]	-	-
ENSMUSG00000067336	6971	6245	8968	7443	10004	2186	4744	6379	4761	4622	8012	9320	7118	6209	9560	Bmpr2	1	59763400	59879014	+	17983	protein_coding	bone morphogenetic protein receptor, type II (serine/threonine kinase) [Source:MGI Symbol;Acc:MGI:1095407]	-	-
ENSMUSG00000003429	4300	7209	5964	7769	7229	8262	5405	5553	5789	5839	4856	7860	8253	8319	9500	Rps11	7	45122379	45124439	-	865	protein_coding	ribosomal protein S11 [Source:MGI Symbol;Acc:MGI:1351329]	-	-
ENSMUSG00000037035	6801	6219	8514	10657	22145	520	353	3200	344	400	6408	8944	2650	11374	13561	Inhbb	1	119415465	119422248	-	4255	protein_coding	inhibin beta-B [Source:MGI Symbol;Acc:MGI:96571]	-	-
ENSMUSG00000047215	3247	7146	6084	7211	6663	5124	7092	7031	6572	6543	5074	8427	7440	7077	10899	Rpl9	5	65388364	65391444	-	3081	protein_coding	ribosomal protein L9 [Source:MGI Symbol;Acc:MGI:1298373]	-	-
ENSMUSG00000074207	9245	10476	5706	2905	4567	8085	7022	11868	10183	8695	4403	3748	4624	4035	5775	Adh1	3	138260991	138290698	+	2233	protein_coding	alcohol dehydrogenase 1 (class I) [Source:MGI Symbol;Acc:MGI:87921]	-	-
ENSMUSG00000024359	5380	8006	7920	7672	5431	4466	6775	7806	7130	7359	7151	6734	5420	6374	7632	Hspa9	18	34937414	34954357	-	3932	protein_coding	heat shock protein 9 [Source:MGI Symbol;Acc:MGI:96245]	-	-
ENSMUSG00000060261	6550	6844	6845	5961	6590	5599	6987	7691	7538	7597	7624	6046	6109	5698	7300	Gtf2i	5	134237834	134314760	-	10199	protein_coding	general transcription factor II I [Source:MGI Symbol;Acc:MGI:1202722]	-	-
ENSMUSG00000054766	7545	8092	8393	7976	6027	4433	5321	5621	5816	5598	8219	6055	6249	7334	8284	Set	2	30057378	30072577	+	4070	protein_coding	SET nuclear oncogene [Source:MGI Symbol;Acc:MGI:1860267]	-	-
ENSMUSG00000012405	5177	6879	6140	6276	7772	6389	6688	6503	6838	6314	5559	7642	6260	7422	8643	Rpl15	14	18267823	18271391	-	2473	protein_coding	ribosomal protein L15 [Source:MGI Symbol;Acc:MGI:1913730]	-	-
ENSMUSG00000031924	10177	6029	5537	4425	4034	4584	9924	10350	9149	11314	6924	3887	3646	3810	5187	Cyb5b	8	107150640	107187471	+	4374	protein_coding	cytochrome b5 type B [Source:MGI Symbol;Acc:MGI:1913677]	-	-
ENSMUSG00000057738	8564	6661	6695	5591	6844	4957	6862	6625	6896	6778	8909	5987	5330	5613	6643	Sptan1	2	29965560	30031451	+	13362	protein_coding	spectrin alpha, non-erythrocytic 1 [Source:MGI Symbol;Acc:MGI:98386]	-	-
ENSMUSG00000024576	5817	6784	7312	6671	5931	4563	7262	7032	6789	6591	8020	6398	6478	5912	7353	Csnk1a1	18	61555274	61590061	+	10502	protein_coding	casein kinase 1, alpha 1 [Source:MGI Symbol;Acc:MGI:1934950]	-	-
ENSMUSG00000057841	5651	6776	6988	7425	6766	7041	5222	5106	5218	5401	5485	7025	7335	7533	9201	Rpl32	6	115805505	115808747	-	963	protein_coding	ribosomal protein L32 [Source:MGI Symbol;Acc:MGI:98038]	-	-
ENSMUSG00000007850	3687	7259	5848	6399	7622	7718	5442	5290	5531	6272	3955	7352	7971	9492	7788	Hnrnph1	11	50376990	50386528	+	5842	protein_coding	heterogeneous nuclear ribonucleoprotein H1 [Source:MGI Symbol;Acc:MGI:1891925]	-	-
ENSMUSG00000032050	7068	7364	6397	5964	5670	3641	7019	7652	7104	7296	6439	5738	5986	5934	8036	Rdx	9	52047173	52088735	+	4639	protein_coding	radixin [Source:MGI Symbol;Acc:MGI:97887]	-	-
ENSMUSG00000063457	5078	6044	6631	6244	7838	8759	6218	6057	5850	6038	5303	6391	6938	6075	7718	Rps15	10	80292453	80294114	+	630	protein_coding	ribosomal protein S15 [Source:MGI Symbol;Acc:MGI:98117]	-	-
ENSMUSG00000032959	3132	6352	5644	5122	5819	9497	8375	9111	9004	9985	4683	5510	3917	5658	5352	Pebp1	5	117282654	117287625	-	1768	protein_coding	phosphatidylethanolamine binding protein 1 [Source:MGI Symbol;Acc:MGI:1344408]	-	-
ENSMUSG00000061315	5752	7022	7638	7559	6215	5343	4865	5062	4945	5129	6091	7105	8209	7132	9022	Naca	10	128035575	128048637	+	6805	protein_coding	nascent polypeptide-associated complex alpha polypeptide [Source:MGI Symbol;Acc:MGI:106095]	-	-
ENSMUSG00000059291	4318	6046	5618	5869	8690	8905	6100	6358	5858	6262	4573	7888	5706	6987	7735	Rpl11	4	136028265	136053428	-	2697	protein_coding	ribosomal protein L11 [Source:MGI Symbol;Acc:MGI:1914275]	-	-
ENSMUSG00000045962	8109	6556	6040	5264	5738	3636	7804	8162	8044	7934	8199	5621	4731	4962	6008	Wnk1	6	119923969	120038672	-	22825	protein_coding	WNK lysine deficient protein kinase 1 [Source:MGI Symbol;Acc:MGI:2442092]	-	-
ENSMUSG00000078812	4575	8650	7388	7620	6724	5949	6257	6193	6271	6348	5602	6284	5512	6649	6751	Eif5a	11	69916714	69921958	-	2377	protein_coding	eukaryotic translation initiation factor 5A [Source:MGI Symbol;Acc:MGI:106248]	-	-
ENSMUSG00000069833	8696	5740	6290	4482	5930	5336	9218	6871	8772	6692	7756	5297	4928	5820	4943	Ahnak	19	8989284	9076919	+	18543	protein_coding	AHNAK nucleoprotein (desmoyokin) [Source:MGI Symbol;Acc:MGI:1316648]	-	-
ENSMUSG00000048076	4254	7276	6549	7129	7101	5389	6712	7117	6745	6783	5993	6425	5687	5719	7565	Arf1	11	59211412	59228270	-	2089	protein_coding	ADP-ribosylation factor 1 [Source:MGI Symbol;Acc:MGI:99431]	-	-
ENSMUSG00000017466	6223	5827	5690	4178	5718	5844	9389	8993	8478	9058	5938	4631	6080	4183	6161	Timp2	11	118301069	118355740	-	3896	protein_coding	tissue inhibitor of metalloproteinase 2 [Source:MGI Symbol;Acc:MGI:98753]	-	-
ENSMUSG00000019970	2675	8416	7298	10290	4700	4961	8160	6233	9730	5526	5715	7838	3207	7345	3756	Sgk1	10	21882184	21999903	+	4903	protein_coding	serum/glucocorticoid regulated kinase 1 [Source:MGI Symbol;Acc:MGI:1340062]	-	-
ENSMUSG00000030432	4788	6070	5564	6339	8058	9103	5586	5501	5544	5430	4387	7377	6583	7392	8009	Rpl28	7	4792874	4795066	+	1840	protein_coding	ribosomal protein L28 [Source:MGI Symbol;Acc:MGI:101839]	-	-
ENSMUSG00000031311	5699	6763	6887	6567	6517	4439	5225	5450	5529	5743	6563	6901	7003	7353	9024	Nono	X	101429318	101448591	+	4375	protein_coding	non-POU-domain-containing, octamer binding protein [Source:MGI Symbol;Acc:MGI:1855692]	-	-
ENSMUSG00000025016	5290	6898	6544	6324	5424	3387	7995	8406	7731	7975	7547	5725	5089	4615	6712	Tm9sf3	19	41210842	41264004	-	6144	protein_coding	transmembrane 9 superfamily member 3 [Source:MGI Symbol;Acc:MGI:1914262]	-	-
ENSMUSG00000052534	7566	5583	6906	4341	6672	5155	7604	9176	7297	8303	6799	4355	5799	4081	5972	Pbx1	1	168119364	168432270	-	13844	protein_coding	pre B cell leukemia homeobox 1 [Source:MGI Symbol;Acc:MGI:97495]	HB-other	HB->HB-other
ENSMUSG00000022836	7204	8930	8602	5399	6446	3960	6788	3955	4105	4310	10782	4488	8670	5363	6475	Mylk	16	34745210	35002420	+	11263	protein_coding	myosin, light polypeptide kinase [Source:MGI Symbol;Acc:MGI:894806]	-	-
ENSMUSG00000023150	3569	4665	5569	6781	9488	1875	2959	2696	2674	2453	5933	13525	13144	8042	11755	Ivns1abp	1	151344477	151364422	+	5435	protein_coding	influenza virus NS1A binding protein [Source:MGI Symbol;Acc:MGI:2152389]	-	-
ENSMUSG00000031353	7161	5348	4792	5018	5691	6549	7229	8680	6328	8369	5017	5515	6523	4835	7922	Rbbp7	X	162760402	162779092	+	2909	protein_coding	retinoblastoma binding protein 7, chromatin remodeling factor [Source:MGI Symbol;Acc:MGI:1194910]	-	-
ENSMUSG00000093674	3999	7659	6218	5448	7654	6070	5583	6016	5917	5820	5912	7585	7033	5482	8466	Rpl41	10	128548114	128549305	-	1168	protein_coding	ribosomal protein L41 [Source:MGI Symbol;Acc:MGI:1915195]	-	-
ENSMUSG00000025153	4651	5081	5048	4692	5974	7313	8336	11322	8461	9903	6955	4056	4186	3849	4953	Fasn	11	120805846	120824547	-	10947	protein_coding	fatty acid synthase [Source:MGI Symbol;Acc:MGI:95485]	-	-
ENSMUSG00000029064	6896	6866	7593	6744	5591	4587	5885	6071	5982	6030	8784	5895	5892	5268	6466	Gnb1	4	155491361	155559269	+	4268	protein_coding	guanine nucleotide binding protein (G protein), beta 1 [Source:MGI Symbol;Acc:MGI:95781]	-	-
ENSMUSG00000026553	6760	6757	5926	5550	6520	4973	6297	7100	6676	6726	6633	5589	6025	5821	7138	Copa	1	172082529	172122330	+	9427	protein_coding	coatomer protein complex subunit alpha [Source:MGI Symbol;Acc:MGI:1334462]	-	-
ENSMUSG00000018830	8713	10137	7977	4147	6431	3482	9197	4853	4490	4370	11826	4182	5648	3718	5094	Myh11	16	14194535	14291372	-	7599	protein_coding	myosin, heavy polypeptide 11, smooth muscle [Source:MGI Symbol;Acc:MGI:102643]	-	-
ENSMUSG00000019818	4855	7174	6397	6906	5793	4122	6573	7271	6674	7118	5675	5906	6214	5880	7607	Cd164	10	41519414	41531048	+	4449	protein_coding	CD164 antigen [Source:MGI Symbol;Acc:MGI:1859568]	-	-
ENSMUSG00000046434	6664	6109	6317	6259	7284	3841	5099	5005	4639	4602	7701	8767	5319	7143	9246	Hnrnpa1	15	103240432	103246692	+	3153	protein_coding	heterogeneous nuclear ribonucleoprotein A1 [Source:MGI Symbol;Acc:MGI:104820]	-	-
ENSMUSG00000018861	4519	7667	5537	5296	6202	9958	7415	7108	8306	7339	2725	4046	3907	7133	6699	Fdxr	11	115268024	115277050	-	2806	protein_coding	ferredoxin reductase [Source:MGI Symbol;Acc:MGI:104724]	-	-
ENSMUSG00000019370	6896	6597	7404	5688	6048	5716	6794	6771	6759	6552	8224	4712	4670	5156	5727	Calm3	7	16915379	16924114	-	2423	protein_coding	calmodulin 3 [Source:MGI Symbol;Acc:MGI:103249]	-	-
ENSMUSG00000032562	5275	6532	6483	5768	6631	6559	6345	6036	6224	6185	6356	6005	6495	5832	6523	Gnai2	9	107614125	107635367	-	3779	protein_coding	guanine nucleotide binding protein (G protein), alpha inhibiting 2 [Source:MGI Symbol;Acc:MGI:95772]	-	-
ENSMUSG00000076432	4527	6498	7271	7576	7279	4183	5032	6105	5215	5884	5540	6637	7203	5749	8350	Ywhaq	12	21390071	21417637	-	3061	protein_coding	tyrosine 3-monooxygenase/tryptophan 5-monooxygenase activation protein theta [Source:MGI Symbol;Acc:MGI:891963]	-	-
ENSMUSG00000015165	5688	5799	6462	5764	7395	6147	5237	5566	5433	5793	5971	6521	6667	7182	7197	Hnrnpl	7	28808541	28822266	+	5953	protein_coding	heterogeneous nuclear ribonucleoprotein L [Source:MGI Symbol;Acc:MGI:104816]	-	-
ENSMUSG00000008683	4822	6212	7343	6448	5900	5132	5469	4932	5248	5018	5225	6556	8241	6365	9119	Rps15a	7	118104372	118116188	-	6270	protein_coding	ribosomal protein S15A [Source:MGI Symbol;Acc:MGI:2389091]	-	-
ENSMUSG00000020850	6867	6220	5453	5222	5493	4366	6833	7294	6983	6854	7601	5796	4650	5073	7200	Prpf8	11	75486816	75509449	+	7461	protein_coding	pre-mRNA processing factor 8 [Source:MGI Symbol;Acc:MGI:2179381]	-	-
ENSMUSG00000028234	5086	5529	6873	6006	7335	6697	5385	5110	5073	5152	5397	6310	8448	6096	7405	Rps20	4	3831334	3835665	-	4080	protein_coding	ribosomal protein S20 [Source:MGI Symbol;Acc:MGI:1914677]	-	-
ENSMUSG00000028618	3703	6013	5585	5987	5916	6390	6812	7502	7615	7254	4317	5777	6130	6214	6351	Tmem59	4	107178399	107200996	+	2056	protein_coding	transmembrane protein 59 [Source:MGI Symbol;Acc:MGI:1929278]	-	-
ENSMUSG00000024900	6526	6720	5092	4691	4317	4370	8775	7981	9258	8332	6344	4000	3565	5437	5779	Cpt1a	19	3323301	3385732	+	4300	protein_coding	carnitine palmitoyltransferase 1a, liver [Source:MGI Symbol;Acc:MGI:1098296]	-	-
ENSMUSG00000005161	5877	7494	6461	7041	6511	5910	4717	5222	5052	5333	4235	6407	5554	8104	7195	Prdx2	8	84969587	84974834	+	3050	protein_coding	peroxiredoxin 2 [Source:MGI Symbol;Acc:MGI:109486]	-	-
ENSMUSG00000049517	3663	5172	5461	6117	7886	7751	5940	5778	5325	5917	4627	7291	6021	6053	8092	Rps23	13	90922958	90924950	+	1268	protein_coding	ribosomal protein S23 [Source:MGI Symbol;Acc:MGI:1913725]	-	-
ENSMUSG00000078578	3943	6835	5994	6875	5383	4433	5978	6187	5994	6161	5318	6422	6872	6636	7433	Ube2d3	3	135438149	135468198	+	24499	protein_coding	ubiquitin-conjugating enzyme E2D 3 [Source:MGI Symbol;Acc:MGI:1913355]	-	-
ENSMUSG00000018326	5765	7498	7105	6334	5641	4651	5944	6234	6092	6347	5714	5281	5960	5732	6124	Ywhab	2	163994960	164018588	+	3382	protein_coding	tyrosine 3-monooxygenase/tryptophan 5-monooxygenase activation protein, beta polypeptide [Source:MGI Symbol;Acc:MGI:1891917]	-	-
ENSMUSG00000024991	5368	6751	5893	5638	5713	3632	5935	6451	6117	5966	6619	6635	5606	6923	7108	Eif3a	19	60761116	60790693	-	5176	protein_coding	eukaryotic translation initiation factor 3, subunit A [Source:MGI Symbol;Acc:MGI:95301]	-	-
ENSMUSG00000023004	4955	7613	6794	6997	6111	4067	4225	4311	4004	4318	6488	7051	7024	7437	8771	Tuba1b	15	98931425	98934565	-	1875	protein_coding	tubulin, alpha 1B [Source:MGI Symbol;Acc:MGI:107804]	-	-
ENSMUSG00000021390	6853	5146	6371	5911	6495	3928	5738	6842	5196	6184	4989	5803	9072	4446	7140	Ogn	13	49608046	49624501	+	2566	protein_coding	osteoglycin [Source:MGI Symbol;Acc:MGI:109278]	-	-
ENSMUSG00000048578	6086	6498	7098	6301	5914	3450	6450	6486	6314	6104	8645	5426	4030	4927	6362	Mlec	5	115142981	115158179	-	6007	protein_coding	malectin [Source:MGI Symbol;Acc:MGI:1924015]	-	-
ENSMUSG00000019877	5520	6306	6525	5690	5738	4530	6776	6860	7185	6708	4593	5656	6270	5592	6048	Serinc1	10	57515774	57532530	-	5150	protein_coding	serine incorporator 1 [Source:MGI Symbol;Acc:MGI:1926228]	-	-
ENSMUSG00000061232	3806	5471	7311	6732	5921	6687	6974	6966	6772	7500	4839	5740	5280	4520	5184	H2-K1	17	33996017	34000333	-	2608	protein_coding	histocompatibility 2, K1, K region [Source:MGI Symbol;Acc:MGI:95904]	-	-
ENSMUSG00000040010	4080	4139	3699	3288	4180	7117	10721	13878	7723	12267	3421	3220	4580	2741	4016	Slc7a5	8	121881150	121907694	-	3708	protein_coding	solute carrier family 7 (cationic amino acid transporter, y+ system), member 5 [Source:MGI Symbol;Acc:MGI:1298205]	-	-
ENSMUSG00000036371	5651	6240	6414	5582	6011	4457	5552	5954	5784	5837	7047	6277	5162	6029	6869	Serbp1	6	67238176	67297736	+	20117	protein_coding	serpine1 mRNA binding protein 1 [Source:MGI Symbol;Acc:MGI:1914120]	-	-
ENSMUSG00000027870	5797	8220	5497	5377	3008	6037	8797	7229	9057	7953	2627	4072	3284	6533	5118	Hao2	3	98874521	98893239	-	2049	protein_coding	hydroxyacid oxidase 2 [Source:MGI Symbol;Acc:MGI:96012]	-	-
ENSMUSG00000014867	4784	5730	6204	4888	6560	5669	6577	7488	6385	7258	5944	4408	5492	4778	6437	Surf4	2	26920040	26933928	-	3281	protein_coding	surfeit gene 4 [Source:MGI Symbol;Acc:MGI:98445]	-	-
ENSMUSG00000061787	4601	5630	5605	6149	7576	8192	5002	5002	4936	5153	4188	6192	6681	6303	7014	Rps17	7	81342732	81345254	-	1274	protein_coding	ribosomal protein S17 [Source:MGI Symbol;Acc:MGI:1309526]	-	-
ENSMUSG00000032485	5400	6449	6927	6989	6461	4412	5285	6535	5945	5978	7134	5152	3051	6299	5671	Scap	9	110333288	110384950	+	7443	protein_coding	SREBF chaperone [Source:MGI Symbol;Acc:MGI:2135958]	-	-
ENSMUSG00000027642	4817	6534	5945	5522	5914	4641	5380	6064	5754	5948	6733	5640	6008	5459	7208	Rpn2	2	157279017	157326319	+	4430	protein_coding	ribophorin II [Source:MGI Symbol;Acc:MGI:98085]	-	-
ENSMUSG00000041028	4225	6366	5750	6047	5018	5171	6593	7914	7381	7902	4209	5293	4470	5283	5240	Ghitm	14	37120092	37135272	-	3756	protein_coding	growth hormone inducible transmembrane protein [Source:MGI Symbol;Acc:MGI:1913342]	-	-
ENSMUSG00000028108	2150	3338	2692	2414	1853	13248	12724	10950	13845	11947	1934	2030	1976	3001	2642	Ecm1	3	95734147	95739569	-	2521	protein_coding	extracellular matrix protein 1 [Source:MGI Symbol;Acc:MGI:103060]	-	-
ENSMUSG00000007817	6779	8154	5930	6502	5215	3521	5499	6234	6607	6556	5683	4754	3668	6212	5370	Zmiz1	14	25459185	25666743	+	12523	protein_coding	zinc finger, MIZ-type containing 1 [Source:MGI Symbol;Acc:MGI:3040693]	-	-
ENSMUSG00000002602	5571	5775	4983	4218	5642	4898	7469	6580	7278	6454	5245	5219	5284	5395	6609	Axl	7	25757273	25788705	-	5033	protein_coding	AXL receptor tyrosine kinase [Source:MGI Symbol;Acc:MGI:1347244]	-	-
ENSMUSG00000040952	3927	6369	5932	6728	6406	6197	5202	4927	4879	4723	4067	6193	7176	5845	7972	Rps19	7	24884371	24889806	+	4685	protein_coding	ribosomal protein S19 [Source:MGI Symbol;Acc:MGI:1333780]	-	-
ENSMUSG00000018293	5040	6723	6329	5437	6770	7412	5345	4853	4974	5213	4526	5406	5848	6013	6403	Pfn1	11	70651850	70654644	-	2405	protein_coding	profilin 1 [Source:MGI Symbol;Acc:MGI:97549]	-	-
ENSMUSG00000036309	5882	5699	6828	6361	4642	4577	5010	5309	5161	5332	6004	5765	6142	6466	7001	Skp1a	11	52231995	52246858	+	2211	protein_coding	S-phase kinase-associated protein 1A [Source:MGI Symbol;Acc:MGI:103575]	-	-
ENSMUSG00000045482	6611	5109	5353	4954	6189	4725	5512	6895	6040	6260	6184	5666	4843	5527	6249	Trrap	5	144767732	144859778	+	20859	protein_coding	transformation/transcription domain-associated protein [Source:MGI Symbol;Acc:MGI:2153272]	-	-
ENSMUSG00000045983	5107	6553	5714	5421	5594	3918	6567	6961	6653	6396	6537	5391	4082	4738	6420	Eif4g1	16	20668313	20692884	+	7301	protein_coding	eukaryotic translation initiation factor 4, gamma 1 [Source:MGI Symbol;Acc:MGI:2384784]	-	-
ENSMUSG00000027002	5043	6227	5989	6019	4509	3861	6660	7190	6561	7137	6112	5030	4799	4682	5852	Nckap1	2	80500512	80581380	-	4964	protein_coding	NCK-associated protein 1 [Source:MGI Symbol;Acc:MGI:1355333]	-	-
ENSMUSG00000021577	4142	4849	5090	4436	5334	5002	7204	8553	7374	8166	5770	5213	4137	4436	5903	Sdha	13	74322254	74350280	-	4126	protein_coding	succinate dehydrogenase complex, subunit A, flavoprotein (Fp) [Source:MGI Symbol;Acc:MGI:1914195]	-	-
ENSMUSG00000001870	4390	7097	8596	9689	7341	1231	1933	1338	3334	925	10244	11578	6314	6957	4478	Ltbp1	17	75005568	75392512	+	10480	protein_coding	latent transforming growth factor beta binding protein 1 [Source:MGI Symbol;Acc:MGI:109151]	-	-
ENSMUSG00000058546	4204	6336	5849	5201	6143	5823	4346	4435	5546	4815	4517	6093	6630	7453	7974	Rpl23a	11	78180932	78183584	-	847	protein_coding	ribosomal protein L23A [Source:MGI Symbol;Acc:MGI:3040672]	-	-
ENSMUSG00000030268	4377	6278	7519	8377	4904	3647	5203	3604	5704	3449	6773	7033	5294	7049	6093	Bcat1	6	144993835	145076184	-	9322	protein_coding	branched chain aminotransferase 1, cytosolic [Source:MGI Symbol;Acc:MGI:104861]	-	-
ENSMUSG00000055302	5303	7358	6187	6536	5902	4393	5655	5232	5400	5373	5210	5481	3966	7027	6262	Mrfap1	5	36794867	36796772	-	1648	protein_coding	Morf4 family associated protein 1 [Source:MGI Symbol;Acc:MGI:1914818]	-	-
ENSMUSG00000022982	4549	5920	5184	6251	5343	8349	5786	6369	5262	6347	3765	5331	4861	5576	6008	Sod1	16	90220754	90226329	+	3970	protein_coding	superoxide dismutase 1, soluble [Source:MGI Symbol;Acc:MGI:98351]	-	-
ENSMUSG00000029998	4596	7249	5809	5623	5351	3594	6304	5734	6720	5553	5906	4878	3915	6439	6916	Pcyox1	6	86386006	86397154	-	4932	protein_coding	prenylcysteine oxidase 1 [Source:MGI Symbol;Acc:MGI:1914131]	-	-
ENSMUSG00000033629	4433	7077	6326	6471	3876	4722	7589	7152	7601	7348	4544	3923	4077	4559	4637	Hacd3	9	64986983	65021693	-	2709	protein_coding	3-hydroxyacyl-CoA dehydratase 3 [Source:MGI Symbol;Acc:MGI:1889341]	-	-
ENSMUSG00000029761	5282	6999	6018	4339	5687	3835	7390	6732	6782	6701	5424	4412	5629	3463	5405	Cald1	6	34598500	34775473	+	12041	protein_coding	caldesmon 1 [Source:MGI Symbol;Acc:MGI:88250]	-	-
ENSMUSG00000003031	3661	5913	6627	6521	3187	4463	7393	5489	9072	5445	7053	5971	3406	5540	4340	Cdkn1b	6	134920401	134925513	+	4552	protein_coding	cyclin-dependent kinase inhibitor 1B [Source:MGI Symbol;Acc:MGI:104565]	-	-
ENSMUSG00000026398	6666	6521	6524	8992	9608	593	645	2087	776	627	6096	8409	4782	10107	11635	Nr5a2	1	136842571	136960448	-	5899	protein_coding	nuclear receptor subfamily 5, group A, member 2 [Source:MGI Symbol;Acc:MGI:1346834]	-	-
ENSMUSG00000026219	6603	5928	5725	5069	4716	3382	5993	6152	6222	6509	7429	5146	4629	4664	5726	Trip12	1	84721189	84840516	-	16601	protein_coding	thyroid hormone receptor interactor 12 [Source:MGI Symbol;Acc:MGI:1309481]	-	-
ENSMUSG00000001440	5717	6090	5812	5990	5291	3499	5199	5365	5157	5212	6796	5723	5266	5567	7027	Kpnb1	11	97159714	97187881	-	6590	protein_coding	karyopherin (importin) beta 1 [Source:MGI Symbol;Acc:MGI:107532]	-	-
ENSMUSG00000021957	6752	5542	5985	5282	4988	5823	5171	5656	5246	5538	7425	4820	4848	5318	5306	Tkt	14	30548359	30574720	+	7355	protein_coding	transketolase [Source:MGI Symbol;Acc:MGI:105992]	-	-
ENSMUSG00000078429	6099	4925	4993	4051	5667	5074	6832	6732	6765	6387	5659	5330	5098	4494	5512	Ctdsp2	10	126978717	126999975	+	5524	protein_coding	CTD (carboxy-terminal domain, RNA polymerase II, polypeptide A) small phosphatase 2 [Source:MGI Symbol;Acc:MGI:1098748]	-	-
ENSMUSG00000024425	4622	5081	5300	4276	4850	5265	6977	8353	7528	8604	4277	4431	4760	3797	5411	Ndfip1	18	38418975	38464399	+	930	protein_coding	Nedd4 family interacting protein 1 [Source:MGI Symbol;Acc:MGI:1929601]	-	-
ENSMUSG00000010277	7174	5528	5719	4995	4314	3954	7309	6763	6806	6415	7538	4026	3268	4399	4962	2610507B11Rik	11	78261752	78290623	+	8798	protein_coding	RIKEN cDNA 2610507B11 gene [Source:MGI Symbol;Acc:MGI:1919753]	-	-
ENSMUSG00000024978	6331	6135	5073	5379	3895	2211	7985	8785	8324	8084	6658	3598	1932	3751	4976	Gpam	19	55069734	55099451	-	3832	protein_coding	glycerol-3-phosphate acyltransferase, mitochondrial [Source:MGI Symbol;Acc:MGI:109162]	-	-
ENSMUSG00000032097	4682	5069	5522	5073	5249	3827	6646	7149	6487	6580	6782	5497	4475	4087	5954	Ddx6	9	44604892	44640731	+	8035	protein_coding	DEAD (Asp-Glu-Ala-Asp) box polypeptide 6 [Source:MGI Symbol;Acc:MGI:104976]	-	-
ENSMUSG00000007815	5682	6646	6457	5795	5099	4055	5633	5454	5929	5602	5621	4967	5220	4739	6067	Rhoa	9	108306129	108337934	+	7494	protein_coding	ras homolog family member A [Source:MGI Symbol;Acc:MGI:1096342]	-	-
ENSMUSG00000090841	2916	5866	4731	4661	6828	7562	6506	5661	5259	5938	4274	5283	5038	5654	6719	Myl6	10	128490860	128494145	-	3187	protein_coding	myosin, light polypeptide 6, alkali, smooth muscle and non-muscle [Source:MGI Symbol;Acc:MGI:109318]	-	-
ENSMUSG00000021282	4587	6703	6048	6135	4564	3712	6263	5831	5866	5482	5259	5358	5541	5343	6073	Eif5	12	111538016	111546752	+	6820	protein_coding	eukaryotic translation initiation factor 5 [Source:MGI Symbol;Acc:MGI:95309]	-	-
ENSMUSG00000000957	9338	4555	7055	4262	5866	4945	5540	4372	5993	4558	7114	4271	5609	4162	5009	Mmp14	14	54431612	54445364	+	5960	protein_coding	matrix metallopeptidase 14 (membrane-inserted) [Source:MGI Symbol;Acc:MGI:101900]	-	-
ENSMUSG00000034612	6375	6326	5051	4132	5793	4322	6538	8017	7646	7709	4241	2865	3680	4845	5079	Chst11	10	82985498	83195900	+	5527	protein_coding	carbohydrate sulfotransferase 11 [Source:MGI Symbol;Acc:MGI:1927166]	-	-
ENSMUSG00000022462	4143	6373	4646	5562	5813	4570	5684	6024	5837	5431	4352	5535	5971	6127	6480	Slc38a2	15	96687392	96699730	-	8838	protein_coding	solute carrier family 38, member 2 [Source:MGI Symbol;Acc:MGI:1915010]	-	-
ENSMUSG00000060147	6937	6637	5154	4515	4138	3514	5783	5408	6532	5709	5417	4833	4531	5579	7798	Serpinb6a	13	33917918	34002794	-	5409	protein_coding	serine (or cysteine) peptidase inhibitor, clade B, member 6a [Source:MGI Symbol;Acc:MGI:103123]	-	-
ENSMUSG00000025745	4971	4570	5246	4009	5241	3847	7339	8687	7598	8770	4938	4493	3132	3509	6106	Hadha	5	30118304	30155162	-	8730	protein_coding	hydroxyacyl-Coenzyme A dehydrogenase/3-ketoacyl-Coenzyme A thiolase/enoyl-Coenzyme A hydratase (trifunctional protein), alpha subunit [Source:MGI Symbol;Acc:MGI:2135593]	-	-
ENSMUSG00000053931	8426	8031	5890	5450	5021	2955	4414	4810	4614	4640	4254	4785	5430	6297	7280	Cnn3	3	121426497	121458207	+	3037	protein_coding	calponin 3, acidic [Source:MGI Symbol;Acc:MGI:1919244]	-	-
ENSMUSG00000035242	3319	6366	4779	5231	6407	5245	6538	6720	6438	6813	4465	4868	5269	4163	5507	Oaz1	10	80826656	80829290	+	2558	protein_coding	ornithine decarboxylase antizyme 1 [Source:MGI Symbol;Acc:MGI:109433]	-	-
ENSMUSG00000073702	3566	5641	4940	6303	6598	7355	4656	4926	4569	4753	3003	5752	6514	6230	7256	Rpl31	1	39367842	39371911	+	1662	protein_coding	ribosomal protein L31 [Source:MGI Symbol;Acc:MGI:2149632]	-	-
ENSMUSG00000020361	4883	6011	5860	5408	5284	3597	5345	5817	5506	5913	5944	4845	5970	4813	6535	Hspa4	11	53259814	53300457	-	5528	protein_coding	heat shock protein 4 [Source:MGI Symbol;Acc:MGI:1342292]	-	-
ENSMUSG00000007836	4257	4894	5207	4342	7198	5950	5806	6191	5585	5370	5476	5388	5414	4507	5432	Hnrnpa0	13	58125879	58128556	-	2678	protein_coding	heterogeneous nuclear ribonucleoprotein A0 [Source:MGI Symbol;Acc:MGI:1924384]	-	-
ENSMUSG00000010095	3488	4292	4253	3521	5359	8987	7061	9547	7019	9374	2613	3565	4062	3605	4258	Slc3a2	19	8706882	8723369	-	3529	protein_coding	solute carrier family 3 (activators of dibasic and neutral amino acid transport), member 2 [Source:MGI Symbol;Acc:MGI:96955]	-	-
ENSMUSG00000040488	3861	4056	4195	2799	4763	6280	10074	8526	8491	7682	5705	3635	4844	2283	3739	Ltbp4	7	27305136	27337692	-	6463	protein_coding	latent transforming growth factor beta binding protein 4 [Source:MGI Symbol;Acc:MGI:1321395]	-	-
ENSMUSG00000029467	4443	6222	5394	5694	4633	3165	5847	5858	5263	5358	7534	4949	5906	4658	5693	Atp2a2	5	122453513	122502225	-	6081	protein_coding	ATPase, Ca++ transporting, cardiac muscle, slow twitch 2 [Source:MGI Symbol;Acc:MGI:88110]	-	-
ENSMUSG00000029713	3644	5520	4950	5019	6249	7409	5431	5868	5711	5852	4092	4978	4835	5398	5529	Gnb2	5	137528127	137533510	-	3402	protein_coding	guanine nucleotide binding protein (G protein), beta 2 [Source:MGI Symbol;Acc:MGI:95784]	-	-
ENSMUSG00000036856	5781	5053	5511	3850	3061	7408	8192	5322	8709	6477	5811	2271	4064	4249	4637	Wnt4	4	137277489	137299726	+	4194	protein_coding	wingless-type MMTV integration site family, member 4 [Source:MGI Symbol;Acc:MGI:98957]	-	-
ENSMUSG00000031751	4498	5232	5146	5233	4416	4576	7413	7186	7134	7016	5065	4227	4440	4181	4587	Amfr	8	93971588	94012842	-	4132	protein_coding	autocrine motility factor receptor [Source:MGI Symbol;Acc:MGI:1345634]	-	-
ENSMUSG00000071650	5223	5938	5651	5090	5596	4026	5070	5395	5295	5074	5615	5435	4907	5731	6289	Ganab	19	8898090	8916663	+	3862	protein_coding	alpha glucosidase 2 alpha neutral subunit [Source:MGI Symbol;Acc:MGI:1097667]	-	-
ENSMUSG00000031278	5235	8811	7049	10339	2947	2123	4785	4266	4588	4674	8013	5250	2534	6292	3324	Acsl4	X	142317993	142390535	-	5405	protein_coding	acyl-CoA synthetase long-chain family member 4 [Source:MGI Symbol;Acc:MGI:1354713]	-	-
ENSMUSG00000025967	3583	5619	5683	6252	5203	3811	4528	4439	4546	4247	5366	6134	7278	5753	7689	Eef1b2	1	63176825	63180486	+	2532	protein_coding	eukaryotic translation elongation factor 1 beta 2 [Source:MGI Symbol;Acc:MGI:1929520]	-	-
ENSMUSG00000020601	2772	2530	6052	3460	12191	4443	3540	8802	5153	6907	1770	5673	5052	3900	7846	Trib2	12	15791727	15816922	-	4335	protein_coding	tribbles pseudokinase 2 [Source:MGI Symbol;Acc:MGI:2145021]	-	-
ENSMUSG00000028656	6557	5871	6021	4712	5327	4585	4724	4543	5134	4892	6315	4673	5366	5320	5876	Cap1	4	122859047	122886056	-	3494	protein_coding	CAP, adenylate cyclase-associated protein 1 (yeast) [Source:MGI Symbol;Acc:MGI:88262]	-	-
ENSMUSG00000032231	5219	7187	5938	5610	4435	4966	5038	4008	4824	4603	5861	4895	5757	6171	5337	Anxa2	9	69453620	69491795	+	3731	protein_coding	annexin A2 [Source:MGI Symbol;Acc:MGI:88246]	-	-
ENSMUSG00000022587	2986	5840	5221	4970	4268	6186	7827	6424	7465	7121	4562	4163	4490	3210	5025	Ly6e	15	74955051	74959905	+	3784	protein_coding	lymphocyte antigen 6 complex, locus E [Source:MGI Symbol;Acc:MGI:106651]	-	-
ENSMUSG00000024665	3062	2781	3618	2551	4080	7428	8877	15214	8004	13585	2146	1795	2324	1440	2801	Fads2	19	10064164	10101503	-	1508	protein_coding	fatty acid desaturase 2 [Source:MGI Symbol;Acc:MGI:1930079]	-	-
ENSMUSG00000018770	2511	4541	4896	4777	7845	6517	5273	8108	5909	7032	2450	5157	4597	4162	5776	Atp5g3	2	73908447	73911326	-	2181	protein_coding	ATP synthase, H+ transporting, mitochondrial F0 complex, subunit C3 (subunit 9) [Source:MGI Symbol;Acc:MGI:2442035]	-	-
ENSMUSG00000041740	5444	5679	5171	4559	5180	4301	5609	6625	6134	6338	5135	4604	4577	4510	5580	Rnf10	5	115241412	115272898	-	7556	protein_coding	ring finger protein 10 [Source:MGI Symbol;Acc:MGI:1859162]	-	-
ENSMUSG00000038991	4519	4867	5537	4481	6927	4137	4958	5771	4910	5553	5616	5001	5102	5033	6765	Txndc5	13	38500079	38528824	-	4492	protein_coding	thioredoxin domain containing 5 [Source:MGI Symbol;Acc:MGI:2145316]	-	-
ENSMUSG00000020321	3411	5614	5504	5747	4812	5214	5370	5611	6181	5764	4383	5199	4858	5462	5783	Mdh1	11	21556787	21572367	-	2567	protein_coding	malate dehydrogenase 1, NAD (soluble) [Source:MGI Symbol;Acc:MGI:97051]	-	-
ENSMUSG00000027422	7577	5569	5158	4190	5544	5249	4888	5283	5047	5096	5697	4160	4414	5389	5274	Rrbp1	2	143947395	144011263	-	8786	protein_coding	ribosome binding protein 1 [Source:MGI Symbol;Acc:MGI:1932395]	-	-
ENSMUSG00000037487	6388	5522	5142	4701	4703	3373	6085	5653	5784	5303	6059	4864	4444	4845	5626	Ubr5	15	37967328	38078854	-	15388	protein_coding	ubiquitin protein ligase E3 component n-recognin 5 [Source:MGI Symbol;Acc:MGI:1918040]	-	-
ENSMUSG00000032096	5059	6132	5574	5061	4976	3257	5321	5810	5338	5880	5159	4722	4948	5121	6090	Arcn1	9	44741564	44767845	-	14915	protein_coding	archain 1 [Source:MGI Symbol;Acc:MGI:2387591]	-	-
ENSMUSG00000011752	4484	6486	5302	5153	5012	4770	5905	6800	6282	6490	3986	4288	3169	5091	5085	Pgam1	19	41911871	41918664	+	1831	protein_coding	phosphoglycerate mutase 1 [Source:MGI Symbol;Acc:MGI:97552]	-	-
ENSMUSG00000030738	7074	5573	5600	4884	4751	3829	4730	4928	4909	4879	6766	4566	4595	4811	5974	Eif3c	7	126546455	126566411	-	3511	protein_coding	eukaryotic translation initiation factor 3, subunit C [Source:MGI Symbol;Acc:MGI:1926966]	-	-
ENSMUSG00000062006	3249	5665	4910	5954	5367	4881	4666	4826	4305	4809	3707	6078	6335	4780	8165	Rpl34	3	130726831	130730398	-	2643	protein_coding	ribosomal protein L34 [Source:MGI Symbol;Acc:MGI:1915686]	-	-
ENSMUSG00000021248	4359	5191	5038	4373	5115	4779	5836	6270	5777	6217	5107	4603	4581	4647	5713	Tmed10	12	85340614	85374847	-	5811	protein_coding	transmembrane p24 trafficking protein 10 [Source:MGI Symbol;Acc:MGI:1915831]	-	-
ENSMUSG00000002900	6069	5316	5128	4906	5551	3635	5025	5590	4855	4675	4626	5859	5210	5012	5927	Lamb1	12	31265234	31329644	+	9917	protein_coding	laminin B1 [Source:MGI Symbol;Acc:MGI:96743]	-	-
ENSMUSG00000026223	4224	4281	5047	3537	5721	5211	6667	7243	6670	6831	5715	4339	4458	2916	4511	Itm2c	1	85894281	85908675	+	2491	protein_coding	integral membrane protein 2C [Source:MGI Symbol;Acc:MGI:1927594]	-	-
ENSMUSG00000014956	3941	6324	5029	5513	3778	2661	5918	6007	5905	5803	6005	5115	5009	4213	6121	Ppp1cb	5	32458843	32517433	+	10913	protein_coding	protein phosphatase 1 catalytic subunit beta [Source:MGI Symbol;Acc:MGI:104871]	-	-
ENSMUSG00000038776	2982	3152	3735	2551	5043	8218	7229	10881	7526	10448	2594	2872	3757	2144	4203	Ephx1	1	180976210	181020904	-	1950	protein_coding	epoxide hydrolase 1, microsomal [Source:MGI Symbol;Acc:MGI:95405]	-	-
ENSMUSG00000025132	4736	5696	5666	5242	5470	4802	5230	5224	5177	5101	4980	4696	5036	4587	5600	Arhgdia	11	120578104	120581624	-	2258	protein_coding	Rho GDP dissociation inhibitor (GDI) alpha [Source:MGI Symbol;Acc:MGI:2178103]	-	-
ENSMUSG00000020456	4060	5337	4987	4867	4519	4760	6293	6880	7014	6832	4754	4079	3879	4135	4833	Ogdh	11	6291633	6356642	+	5456	protein_coding	oxoglutarate (alpha-ketoglutarate) dehydrogenase (lipoamide) [Source:MGI Symbol;Acc:MGI:1098267]	-	-
ENSMUSG00000031591	3681	5192	4989	4629	4931	5041	6079	7760	6157	8280	2717	4289	4063	4170	5192	Asah1	8	41340197	41374773	-	3390	protein_coding	N-acylsphingosine amidohydrolase 1 [Source:MGI Symbol;Acc:MGI:1277124]	-	-
ENSMUSG00000016921	2554	5437	4528	5392	6368	6549	4198	4884	4459	4835	2505	5947	6983	6711	5803	Srsf6	2	162931528	162937121	+	4810	protein_coding	serine/arginine-rich splicing factor 6 [Source:MGI Symbol;Acc:MGI:1915246]	-	-
ENSMUSG00000021944	3502	3707	4414	3421	7043	5605	6434	10848	6537	7551	2297	3619	3503	3475	5110	Gata4	14	63198922	63271692	-	3904	protein_coding	GATA binding protein 4 [Source:MGI Symbol;Acc:MGI:95664]	C2C2-GATA	C2C2->C2C2-GATA
ENSMUSG00000037236	3813	5542	5956	5684	4675	3409	4260	4584	4392	4662	5354	6141	6152	6080	6332	Matr3	18	35562146	35593835	+	9869	protein_coding	matrin 3 [Source:MGI Symbol;Acc:MGI:1298379]	-	-
ENSMUSG00000066036	7746	4756	4785	4178	5052	4359	5406	6289	5832	5839	6078	4188	3749	4416	4342	Ubr4	4	139352609	139489588	+	17997	protein_coding	ubiquitin protein ligase E3 component n-recognin 4 [Source:MGI Symbol;Acc:MGI:1916366]	-	-
ENSMUSG00000039477	6715	4852	4315	3727	4833	4154	6979	7166	7130	6003	5821	4117	2890	3865	4307	Tnrc18	5	142724661	142817662	-	12266	protein_coding	trinucleotide repeat containing 18 [Source:MGI Symbol;Acc:MGI:3648294]	-	-
ENSMUSG00000039361	5245	5391	6100	5100	4973	3352	4927	5250	4763	5129	4975	5139	5578	5237	5669	Picalm	7	90130213	90213465	+	15732	protein_coding	phosphatidylinositol binding clathrin assembly protein [Source:MGI Symbol;Acc:MGI:2385902]	-	-
ENSMUSG00000062980	6521	4480	4310	3669	4224	4124	6630	6684	5807	6575	4414	4472	5766	3971	5120	Cped1	6	21985916	22256404	+	8279	protein_coding	cadherin-like and PC-esterase domain containing 1 [Source:MGI Symbol;Acc:MGI:2444814]	-	-
ENSMUSG00000051695	3477	5772	4734	5065	5963	4597	5142	5722	5359	5221	3705	5020	4624	5502	6670	Pcbp1	6	86524492	86526321	-	1830	protein_coding	poly(rC) binding protein 1 [Source:MGI Symbol;Acc:MGI:1345635]	-	-
ENSMUSG00000026478	7975	6049	4881	4213	4699	3066	5545	6194	5303	5886	5719	4304	3801	4119	4700	Lamc1	1	153218922	153332786	-	8272	protein_coding	laminin, gamma 1 [Source:MGI Symbol;Acc:MGI:99914]	-	-
ENSMUSG00000030123	6842	5028	4799	3718	3937	4783	7448	7459	6758	7665	4577	3722	2642	3163	3807	Plxnd1	6	115954811	115995005	-	7301	protein_coding	plexin D1 [Source:MGI Symbol;Acc:MGI:2154244]	-	-
ENSMUSG00000023367	4961	5630	5893	4417	4280	6273	5590	5284	5363	5960	4592	4073	4794	4281	4852	Tmem176a	6	48840919	48847071	+	3810	protein_coding	transmembrane protein 176A [Source:MGI Symbol;Acc:MGI:1913308]	-	-
ENSMUSG00000027763	7076	5273	5303	4210	4482	3969	5718	6580	5489	6489	4014	4280	4391	4385	4363	Mbnl1	3	60472830	60629750	+	18717	protein_coding	muscleblind like splicing factor 1 [Source:MGI Symbol;Acc:MGI:1928482]	C3H	C3H
ENSMUSG00000036275	3260	4722	4951	4498	5338	3825	5972	6632	6474	6306	4581	4684	4489	4356	5802	9530068E07Rik	11	52396428	52408728	+	3296	protein_coding	RIKEN cDNA 9530068E07 gene [Source:MGI Symbol;Acc:MGI:2654705]	-	-
ENSMUSG00000031765	3142	5491	3515	5211	3941	9074	4559	5666	4867	5583	1401	4755	5906	6162	6538	Mt1	8	94179082	94180327	+	1246	protein_coding	metallothionein 1 [Source:MGI Symbol;Acc:MGI:97171]	-	-
ENSMUSG00000001847	4217	5682	5549	5057	4546	3625	5699	5721	5759	5713	4399	4767	5207	4175	5618	Rac1	5	143503634	143528036	-	4496	protein_coding	Rac family small GTPase 1 [Source:MGI Symbol;Acc:MGI:97845]	-	-
ENSMUSG00000028036	1896	5377	6830	6913	7037	3264	5914	4854	8397	4269	7945	5593	2567	3261	1445	Ptgfr	3	151796502	151837630	-	6778	protein_coding	prostaglandin F receptor [Source:MGI Symbol;Acc:MGI:97796]	-	-
ENSMUSG00000069769	4404	6181	5984	6223	4663	3488	5974	6042	5714	5964	5154	3995	2974	4560	4124	Msi2	11	88339382	88718513	-	10405	protein_coding	musashi RNA-binding protein 2 [Source:MGI Symbol;Acc:MGI:1923876]	-	-
ENSMUSG00000023456	5243	5662	5465	4966	5601	3823	4619	5133	4269	5042	5390	4349	4121	5373	6364	Tpi1	6	124810586	124814296	-	2753	protein_coding	triosephosphate isomerase 1 [Source:MGI Symbol;Acc:MGI:98797]	-	-
ENSMUSG00000029472	4751	5061	5384	5206	5639	4773	4123	4547	4282	4458	4777	5152	5224	5550	6276	Anapc5	5	122787459	122821339	-	6111	protein_coding	anaphase-promoting complex subunit 5 [Source:MGI Symbol;Acc:MGI:1929722]	-	-
ENSMUSG00000034024	4606	5841	5203	5487	5177	3866	3871	4436	4428	4269	4923	5801	4910	5682	6620	Cct2	10	117051001	117063814	-	2557	protein_coding	chaperonin containing Tcp1, subunit 2 (beta) [Source:MGI Symbol;Acc:MGI:107186]	-	-
ENSMUSG00000021427	4781	5244	5005	4785	4873	3726	5238	5960	5051	5595	4933	4162	5155	4815	5757	Ssr1	13	37966605	37994217	-	10431	protein_coding	signal sequence receptor, alpha [Source:MGI Symbol;Acc:MGI:105082]	-	-
ENSMUSG00000065954	7527	4512	4506	3348	4140	4526	7192	7628	6250	7094	5179	2764	3465	3071	3488	Tacc1	8	25154552	25256588	-	11920	protein_coding	transforming, acidic coiled-coil containing protein 1 [Source:MGI Symbol;Acc:MGI:2443510]	-	-
ENSMUSG00000004535	4615	4672	5572	4602	5290	3805	4868	5282	5216	5256	5343	4333	5326	4640	5843	Tax1bp1	6	52713729	52766780	+	9991	protein_coding	Tax1 (human T cell leukemia virus type I) binding protein 1 [Source:MGI Symbol;Acc:MGI:1289308]	-	-
ENSMUSG00000024759	6154	5012	5347	4343	3726	2815	6339	6440	6274	6516	5894	4463	3111	3702	4526	Atl3	19	7494040	7538608	+	6698	protein_coding	atlastin GTPase 3 [Source:MGI Symbol;Acc:MGI:1924270]	-	-
ENSMUSG00000020571	3943	5247	4966	4305	5765	3618	4303	4392	4248	4092	7720	5105	5188	5294	6400	Pdia6	12	17266545	17284770	+	3745	protein_coding	protein disulfide isomerase associated 6 [Source:MGI Symbol;Acc:MGI:1919103]	-	-
ENSMUSG00000000278	3657	5264	4587	4292	4966	4349	5706	6672	6612	6558	3267	4929	3804	4469	5329	Scpep1	11	88924020	88955465	-	2097	protein_coding	serine carboxypeptidase 1 [Source:MGI Symbol;Acc:MGI:1921867]	-	-
ENSMUSG00000031207	3912	6299	5459	4406	6353	3641	5246	4535	5134	4846	3587	4428	5957	5027	5622	Msn	X	96096042	96168552	+	6327	protein_coding	moesin [Source:MGI Symbol;Acc:MGI:97167]	-	-
ENSMUSG00000054808	6526	5170	5337	4050	4707	3947	6084	5938	5363	5659	6063	3908	3412	3545	4596	Actn4	7	28893248	28962340	-	6127	protein_coding	actinin alpha 4 [Source:MGI Symbol;Acc:MGI:1890773]	-	-
ENSMUSG00000040731	4573	5059	4900	4479	5142	4129	5457	5888	5208	5268	5736	4792	4289	4125	5230	Eif4h	5	134619721	134639490	-	5551	protein_coding	eukaryotic translation initiation factor 4H [Source:MGI Symbol;Acc:MGI:1341822]	-	-
ENSMUSG00000017493	5031	6218	5395	4055	4238	4416	5566	4077	5956	4391	6523	3192	5013	4223	5796	Igfbp4	11	99041244	99054392	+	4416	protein_coding	insulin-like growth factor binding protein 4 [Source:MGI Symbol;Acc:MGI:96439]	-	-
ENSMUSG00000025544	3764	5091	4677	4712	4302	3255	5769	6125	5999	5821	5755	4863	4183	4097	5672	Tm9sf2	14	122107038	122159604	+	3107	protein_coding	transmembrane 9 superfamily member 2 [Source:MGI Symbol;Acc:MGI:1915309]	-	-
ENSMUSG00000020460	1477	6509	5018	7606	6722	6554	4678	5607	6115	2183	1892	5644	8264	2451	3329	Rps27a	11	29545846	29548109	-	1972	protein_coding	ribosomal protein S27A [Source:MGI Symbol;Acc:MGI:1925544]	-	-
ENSMUSG00000020362	3939	4602	5108	5204	6824	2708	3740	4256	3932	4130	4737	6782	5874	4844	7234	Cnot6	11	49671503	49712723	-	6610	protein_coding	CCR4-NOT transcription complex, subunit 6 [Source:MGI Symbol;Acc:MGI:2144529]	-	-
ENSMUSG00000052727	6759	4638	7160	5708	6292	1510	2323	2406	2690	1786	10314	5692	5093	5737	5765	Map1b	13	99421446	99516540	-	15846	protein_coding	microtubule-associated protein 1B [Source:MGI Symbol;Acc:MGI:1306778]	-	-
ENSMUSG00000079477	3480	5239	5070	4971	5127	4370	5111	6082	5181	5932	4218	4294	5098	4149	5362	Rab7	6	87999106	88045270	-	2610	protein_coding	RAB7, member RAS oncogene family [Source:MGI Symbol;Acc:MGI:105068]	-	-
ENSMUSG00000036880	4134	4154	5005	4339	4095	6594	5974	6340	6065	6917	4282	4057	3426	3907	4342	Acaa2	18	74779197	74806207	+	1515	protein_coding	acetyl-Coenzyme A acyltransferase 2 (mitochondrial 3-oxoacyl-Coenzyme A thiolase) [Source:MGI Symbol;Acc:MGI:1098623]	-	-
ENSMUSG00000021756	7318	4594	4934	3564	3775	2833	5960	5906	5628	5745	7187	3993	4611	3055	4152	Il6st	13	112464070	112510086	+	11099	protein_coding	interleukin 6 signal transducer [Source:MGI Symbol;Acc:MGI:96560]	-	-
ENSMUSG00000053477	6161	4043	4808	3806	4295	4282	6000	6097	6055	6051	4200	4101	4504	4251	4456	Tcf4	18	69343356	69689079	+	27382	protein_coding	transcription factor 4 [Source:MGI Symbol;Acc:MGI:98506]	bHLH	bHLH
ENSMUSG00000031029	3740	4582	5335	4717	5014	3976	4337	4419	4561	4287	5269	5341	6048	4748	6679	Eif3f	7	108934417	108942951	+	2891	protein_coding	eukaryotic translation initiation factor 3, subunit F [Source:MGI Symbol;Acc:MGI:1913335]	-	-
ENSMUSG00000027712	3756	6726	5619	7095	4210	2905	4357	4498	4479	4391	5760	5511	4410	4731	4597	Anxa5	3	36448923	36475894	-	1777	protein_coding	annexin A5 [Source:MGI Symbol;Acc:MGI:106008]	-	-
ENSMUSG00000028759	3755	5098	4253	4436	4936	3742	5360	5947	5378	5411	4065	5267	4296	5140	5958	Hp1bp3	4	138216296	138244683	+	8433	protein_coding	heterochromatin protein 1, binding protein 3 [Source:MGI Symbol;Acc:MGI:109369]	-	-
ENSMUSG00000028820	3310	5592	4727	5415	5485	3131	4414	4654	4981	4609	4620	5523	4656	5645	6176	Sfpq	4	127021324	127037013	+	4743	protein_coding	splicing factor proline/glutamine rich (polypyrimidine tract binding protein associated) [Source:MGI Symbol;Acc:MGI:1918764]	-	-
ENSMUSG00000039159	5468	4679	4907	4493	4692	4385	5697	5984	6170	6062	4770	4140	3273	3715	4458	Ube2h	6	30211289	30304539	-	4780	protein_coding	ubiquitin-conjugating enzyme E2H [Source:MGI Symbol;Acc:MGI:104632]	-	-
ENSMUSG00000063316	4392	4781	5155	4944	5915	6953	4442	4144	4096	4026	3664	4396	5627	4908	5435	Rpl27	11	101442298	101445529	+	1535	protein_coding	ribosomal protein L27 [Source:MGI Symbol;Acc:MGI:98036]	-	-
ENSMUSG00000003316	8739	4998	4650	3486	4301	2187	5484	5981	5277	5331	7191	4034	2884	3483	4834	Glg1	8	111154421	111259216	-	7090	protein_coding	golgi apparatus protein 1 [Source:MGI Symbol;Acc:MGI:104967]	-	-
ENSMUSG00000021111	4617	5657	5410	5530	4383	3032	4597	4908	5006	4985	4750	4798	4450	5095	5639	Papola	12	105784694	105838944	+	6595	protein_coding	poly (A) polymerase alpha [Source:MGI Symbol;Acc:MGI:109301]	-	-
ENSMUSG00000036427	4604	5396	5701	5125	5165	4614	3865	4121	4532	3916	5504	4903	4431	5507	5397	Gpi1	7	34201330	34230336	-	6452	protein_coding	glucose phosphate isomerase 1 [Source:MGI Symbol;Acc:MGI:95797]	-	-
ENSMUSG00000033306	7657	6528	5527	3962	3778	2688	5789	5276	5507	5280	6028	3761	4183	3199	3525	Lpp	16	24393507	24992578	+	22046	protein_coding	LIM domain containing preferred translocation partner in lipoma [Source:MGI Symbol;Acc:MGI:2441849]	LIM	LIM
ENSMUSG00000070327	5636	3918	5286	5117	4583	4648	5834	5545	5273	7093	4192	4238	3040	3863	4178	Rnf213	11	119393100	119487418	+	16888	protein_coding	ring finger protein 213 [Source:MGI Symbol;Acc:MGI:1289196]	-	-
ENSMUSG00000051391	3885	5920	4644	4917	4420	3816	5535	6317	6022	5891	3840	4091	3836	4337	4631	Ywhag	5	135908409	135934616	-	5500	protein_coding	tyrosine 3-monooxygenase/tryptophan 5-monooxygenase activation protein, gamma polypeptide [Source:MGI Symbol;Acc:MGI:108109]	-	-
ENSMUSG00000033715	3064	2207	6092	6490	7421	1267	2012	2552	2094	1605	5854	10197	7303	5829	8013	Akr1c14	13	4049011	4090688	+	3239	protein_coding	aldo-keto reductase family 1, member C14 [Source:MGI Symbol;Acc:MGI:2145458]	-	-
ENSMUSG00000051853	4366	5367	5082	4357	4307	3953	5540	5332	6025	5177	5757	4347	4126	4147	4061	Arf3	15	98736634	98763214	-	4824	protein_coding	ADP-ribosylation factor 3 [Source:MGI Symbol;Acc:MGI:99432]	-	-
ENSMUSG00000024940	3572	4438	4413	4329	5355	5284	5708	5403	5654	4877	5421	4359	4147	4458	4468	Ltbp3	19	5740904	5758532	+	5190	protein_coding	latent transforming growth factor beta binding protein 3 [Source:MGI Symbol;Acc:MGI:1101355]	-	-
ENSMUSG00000029823	2911	4239	4301	4047	6034	6408	4298	5287	4559	5227	2654	5119	6001	6130	4591	Luc7l2	6	38551334	38609470	+	12084	protein_coding	LUC7-like 2 (S. cerevisiae) [Source:MGI Symbol;Acc:MGI:2183260]	-	-
ENSMUSG00000021190	2699	4779	4917	4197	7565	4558	5640	4030	7609	4022	3200	5138	4898	4187	4309	Lgmn	12	102394084	102439813	-	2323	protein_coding	legumain [Source:MGI Symbol;Acc:MGI:1330838]	-	-
ENSMUSG00000026675	4219	6254	7094	11638	3307	1921	4028	3596	3850	3846	6141	8876	1324	4715	883	Hsd17b7	1	169949535	169969241	-	5104	protein_coding	hydroxysteroid (17-beta) dehydrogenase 7 [Source:MGI Symbol;Acc:MGI:1330808]	-	-
ENSMUSG00000071415	3349	4744	4865	5213	4888	5658	4020	4309	4466	4718	3848	5662	4607	5072	6154	Rpl23	11	97777527	97782437	-	1770	protein_coding	ribosomal protein L23 [Source:MGI Symbol;Acc:MGI:1929455]	-	-
ENSMUSG00000018379	3236	5969	4501	5402	5413	4078	4265	4397	4258	4664	3486	5576	4787	5853	5678	Srsf1	11	88047373	88053755	+	5710	protein_coding	serine/arginine-rich splicing factor 1 [Source:MGI Symbol;Acc:MGI:98283]	-	-
ENSMUSG00000027893	4503	4342	4939	3741	4585	4014	5226	5903	4893	6085	4730	4240	5084	4214	4781	Ahcyl1	3	107663118	107696560	-	6690	protein_coding	S-adenosylhomocysteine hydrolase-like 1 [Source:MGI Symbol;Acc:MGI:2385184]	-	-
ENSMUSG00000020358	3540	4762	4599	4464	5902	4214	4843	5079	4908	4760	5609	5293	3301	4863	5033	Hnrnpab	11	51600100	51606847	-	2782	protein_coding	heterogeneous nuclear ribonucleoprotein A/B [Source:MGI Symbol;Acc:MGI:1330294]	-	-
ENSMUSG00000022234	5256	5509	5720	4848	4057	3041	4040	4169	4334	4237	6358	4694	4256	4663	5945	Cct5	15	31590800	31601804	-	2766	protein_coding	chaperonin containing Tcp1, subunit 5 (epsilon) [Source:MGI Symbol;Acc:MGI:107185]	-	-
ENSMUSG00000031229	4947	4410	4646	4151	4436	3702	5036	5351	4997	5693	5252	4611	4359	4929	4593	Atrx	X	105797615	105929403	-	21757	protein_coding	ATRX, chromatin remodeler [Source:MGI Symbol;Acc:MGI:103067]	SNF2	SNF2
ENSMUSG00000044167	5637	3956	5550	5736	8369	1102	2144	2555	2251	1972	5322	7374	5999	4336	8726	Foxo1	3	52268336	52353221	+	8665	protein_coding	forkhead box O1 [Source:MGI Symbol;Acc:MGI:1890077]	-	-
ENSMUSG00000038375	5626	4660	4156	4033	3204	4867	7003	6078	7890	6620	4216	3172	2207	3672	3304	Trp53inp2	2	155381059	155389850	+	5257	protein_coding	transformation related protein 53 inducible nuclear protein 2 [Source:MGI Symbol;Acc:MGI:1915978]	-	-
ENSMUSG00000006740	3677	4737	4823	4375	3769	2623	6233	7296	6298	6765	5326	3830	3592	3032	4247	Kif5b	18	6201002	6242174	-	7395	protein_coding	kinesin family member 5B [Source:MGI Symbol;Acc:MGI:1098268]	-	-
ENSMUSG00000024811	4333	4691	4334	4472	4080	2640	5590	5799	5244	5388	6132	4827	3926	3829	5330	Tnks2	19	36834232	36893477	+	10406	protein_coding	tankyrase, TRF1-interacting ankyrin-related ADP-ribose polymerase 2 [Source:MGI Symbol;Acc:MGI:1921743]	-	-
ENSMUSG00000070047	5381	3511	5517	3603	8496	1601	3862	7591	4416	4168	5841	4755	2837	3129	5713	Fat1	8	44935447	45052257	+	15655	protein_coding	FAT atypical cadherin 1 [Source:MGI Symbol;Acc:MGI:109168]	-	-
ENSMUSG00000056851	4103	4451	4878	4152	4937	3866	4440	4568	4534	4606	4522	5224	4798	5290	5917	Pcbp2	15	102470539	102500061	+	5203	protein_coding	poly(rC) binding protein 2 [Source:MGI Symbol;Acc:MGI:108202]	-	-
ENSMUSG00000036606	6432	4333	4930	3738	4961	2831	4288	4164	4124	3736	8259	4279	4299	3991	5908	Plxnb2	15	89155549	89180788	-	7720	protein_coding	plexin B2 [Source:MGI Symbol;Acc:MGI:2154239]	-	-
ENSMUSG00000034908	5805	4515	4694	3848	4830	4436	5555	5988	5078	5902	4318	3415	3814	3379	4695	Sidt2	9	45937857	45955258	-	5146	protein_coding	SID1 transmembrane family, member 2 [Source:MGI Symbol;Acc:MGI:2446134]	-	-
ENSMUSG00000020241	3727	3681	5145	3000	5234	5950	5346	5319	6336	4962	4210	4095	5236	3380	4488	Col6a2	10	76595762	76623630	-	8326	protein_coding	collagen, type VI, alpha 2 [Source:MGI Symbol;Acc:MGI:88460]	-	-
ENSMUSG00000061983	2872	4715	5212	5456	4300	4014	4540	4203	3304	3282	2963	5543	6406	5767	7316	Rps12	10	23785183	23787275	-	2027	protein_coding	ribosomal protein S12 [Source:MGI Symbol;Acc:MGI:98105]	-	-
ENSMUSG00000006498	3552	5608	5225	5023	4770	3462	4249	4779	4499	4400	5042	4934	4273	4295	5547	Ptbp1	10	79854427	79864771	+	4740	protein_coding	polypyrimidine tract binding protein 1 [Source:MGI Symbol;Acc:MGI:97791]	-	-
ENSMUSG00000039262	5467	4100	3772	3314	4387	2938	6445	6254	6033	5520	6020	4269	3575	2899	4526	Prrc2b	2	32151082	32234537	+	11262	protein_coding	proline-rich coiled-coil 2B [Source:MGI Symbol;Acc:MGI:1923304]	-	-
ENSMUSG00000028410	3368	5420	4137	4475	3962	4297	5062	5049	5317	5563	4422	4416	4581	4415	5027	Dnaja1	4	40722150	40737149	+	8629	protein_coding	DnaJ heat shock protein family (Hsp40) member A1 [Source:MGI Symbol;Acc:MGI:1270129]	-	-
ENSMUSG00000063229	4193	6471	5458	5537	5629	2313	3118	3013	2885	2764	6993	4444	4054	5876	6757	Ldha	7	46841475	46855627	+	3310	protein_coding	lactate dehydrogenase A [Source:MGI Symbol;Acc:MGI:96759]	-	-
ENSMUSG00000028760	6960	6026	5053	5069	3329	4159	4303	4724	4644	4828	5032	3565	2657	5270	3842	Eif4g3	4	137993022	138208508	+	11063	protein_coding	eukaryotic translation initiation factor 4 gamma, 3 [Source:MGI Symbol;Acc:MGI:1923935]	-	-
ENSMUSG00000020458	3830	4879	4827	4258	4502	2918	5244	4870	5514	4482	5374	4928	4707	4285	4750	Rtn4	11	29692947	29744331	+	6991	protein_coding	reticulon 4 [Source:MGI Symbol;Acc:MGI:1915835]	-	-
ENSMUSG00000020349	4052	5272	5294	5077	4287	3614	4517	4641	4732	4805	4405	4074	4760	4903	4868	Ppp2ca	11	52098681	52127778	+	7490	protein_coding	protein phosphatase 2 (formerly 2A), catalytic subunit, alpha isoform [Source:MGI Symbol;Acc:MGI:1321159]	-	-
ENSMUSG00000039286	5589	4765	4657	4537	6206	2509	4464	5036	5000	4565	4094	4000	3729	4470	5643	Fndc3b	3	27416162	27711307	-	11485	protein_coding	fibronectin type III domain containing 3B [Source:MGI Symbol;Acc:MGI:1919257]	-	-
ENSMUSG00000049470	4596	3953	4461	4369	3804	2409	6457	6729	5485	5860	6773	4133	3147	2886	4202	Aff4	11	53350833	53421830	+	13450	protein_coding	AF4/FMR2 family, member 4 [Source:MGI Symbol;Acc:MGI:2136171]	-	-
ENSMUSG00000020671	4201	4905	5098	4235	4251	3583	5036	6108	5515	5938	3619	3817	3903	4115	4930	Rab10	12	3247428	3309969	-	3513	protein_coding	RAB10, member RAS oncogene family [Source:MGI Symbol;Acc:MGI:105066]	-	-
ENSMUSG00000027447	3339	4103	4473	3905	4791	6521	5517	5353	4918	5633	3509	3908	4627	3905	4742	Cst3	2	148871722	148875692	-	1266	protein_coding	cystatin C [Source:MGI Symbol;Acc:MGI:102519]	-	-
ENSMUSG00000027808	3455	4488	4894	4580	3900	3127	5256	5907	5191	5782	4802	4165	4754	3828	5076	Serp1	3	58519817	58525892	-	4611	protein_coding	stress-associated endoplasmic reticulum protein 1 [Source:MGI Symbol;Acc:MGI:92638]	-	-
ENSMUSG00000039911	4135	5316	4430	3853	7141	2872	3422	4048	5165	4585	2400	5047	4855	5363	6529	Spsb1	4	149896283	149955043	-	4396	protein_coding	splA/ryanodine receptor domain and SOCS box containing 1 [Source:MGI Symbol;Acc:MGI:1921896]	-	-
ENSMUSG00000035247	5700	5002	4543	4690	3520	2532	5174	5174	5204	4962	6888	4346	3306	3669	4444	Hectd1	12	51743722	51829536	-	14950	protein_coding	HECT domain E3 ubiquitin protein ligase 1 [Source:MGI Symbol;Acc:MGI:2384768]	-	-
ENSMUSG00000021134	1344	3972	3384	4212	5825	6563	4777	4353	4342	4355	2066	6351	5733	6641	5233	Srsf5	12	80945504	80950507	+	3988	protein_coding	serine/arginine-rich splicing factor 5 [Source:MGI Symbol;Acc:MGI:98287]	-	-
ENSMUSG00000021660	4089	5075	5244	5044	4158	3802	3419	3530	3491	3655	4535	5210	5652	5476	6542	Btf3	13	98309896	98317006	-	1739	protein_coding	basic transcription factor 3 [Source:MGI Symbol;Acc:MGI:1202875]	-	-
ENSMUSG00000018501	5594	4845	4205	3923	3992	3014	5436	5717	5632	5634	5518	4088	3271	3682	4347	Ncor1	11	62316426	62458541	-	12811	protein_coding	nuclear receptor co-repressor 1 [Source:MGI Symbol;Acc:MGI:1349717]	MYB-related	MYB->MYB-related
ENSMUSG00000037072	2619	5314	4648	4701	4329	3963	4888	5171	4927	5390	2957	3930	5374	4617	6004	Selenof	3	144570304	144597680	+	5819	protein_coding	selenoprotein F [Source:MGI Symbol;Acc:MGI:1927947]	-	-
ENSMUSG00000026034	2162	4646	3789	4876	5596	5971	3643	3348	3927	4447	1999	5982	6342	6593	5494	Clk1	1	58410189	58424066	-	8132	protein_coding	CDC-like kinase 1 [Source:MGI Symbol;Acc:MGI:107403]	-	-
ENSMUSG00000068220	3375	5780	4871	3905	4988	6004	4309	3747	4275	4470	3479	3732	4169	5511	6162	Lgals1	15	78926725	78930465	+	903	protein_coding	lectin, galactose binding, soluble 1 [Source:MGI Symbol;Acc:MGI:96777]	-	-
ENSMUSG00000025510	4290	4799	5149	4656	4505	5069	5217	5462	5261	5928	3981	3427	3134	3897	3992	Cd151	7	141467392	141471473	+	2741	protein_coding	CD151 antigen [Source:MGI Symbol;Acc:MGI:1096360]	-	-
ENSMUSG00000073411	3163	3982	5086	4803	5278	5390	5547	4794	4600	5336	4038	4859	4447	3337	4053	H2-D1	17	35262730	35267499	+	2579	protein_coding	histocompatibility 2, D region locus 1 [Source:MGI Symbol;Acc:MGI:95896]	-	-
ENSMUSG00000009291	3365	4730	4721	4422	4282	3936	5189	5418	4957	5130	3984	4391	4212	4533	5414	Pttg1ip	10	77581720	77598732	+	3877	protein_coding	pituitary tumor-transforming 1 interacting protein [Source:MGI Symbol;Acc:MGI:2652132]	-	-
ENSMUSG00000041329	3577	5393	4824	5251	5803	3114	3778	5287	4450	4614	2534	4440	3143	5230	7221	Atp1b2	11	69599736	69605942	-	4085	protein_coding	ATPase, Na+/K+ transporting, beta 2 polypeptide [Source:MGI Symbol;Acc:MGI:88109]	-	-
ENSMUSG00000005566	4163	4912	4517	4734	4767	3320	3890	4420	4100	3835	5265	5248	4727	4634	6089	Trim28	7	12999114	13031035	+	4158	protein_coding	tripartite motif-containing 28 [Source:MGI Symbol;Acc:MGI:109274]	DBB	DBB
ENSMUSG00000050912	3386	4690	4762	4403	3679	3416	6771	5983	6370	5873	3961	3665	3431	3721	4364	Tmem123	9	7764041	7794333	+	3109	protein_coding	transmembrane protein 123 [Source:MGI Symbol;Acc:MGI:1919179]	-	-
ENSMUSG00000055322	6966	4556	4002	2627	3270	3785	7462	6609	5386	5709	5566	3282	2903	2920	3410	Tns1	1	73910231	74124449	-	16010	protein_coding	tensin 1 [Source:MGI Symbol;Acc:MGI:104552]	-	-
ENSMUSG00000026211	3818	3583	3886	4235	8770	3488	3506	5239	3833	3895	4289	5166	3250	5108	6268	Obsl1	1	75479310	75506452	-	8467	protein_coding	obscurin-like 1 [Source:MGI Symbol;Acc:MGI:2138628]	-	-
ENSMUSG00000026255	2274	4263	2791	2517	3180	6910	8901	8964	9139	9261	1560	1705	2286	2052	2517	Efhd1	1	87264363	87310839	+	2125	protein_coding	EF hand domain containing 1 [Source:MGI Symbol;Acc:MGI:1921607]	-	-
ENSMUSG00000018042	3926	4565	4549	3458	4377	5440	5117	5412	4914	5274	5362	3568	4754	3687	3791	Cyb5r3	15	83153494	83172592	-	4298	protein_coding	cytochrome b5 reductase 3 [Source:MGI Symbol;Acc:MGI:94893]	-	-
ENSMUSG00000016319	4485	5267	4314	4295	5499	4849	4139	5502	4167	5181	2971	4259	3393	4727	5126	Slc25a5	X	36795651	36798807	+	1646	protein_coding	solute carrier family 25 (mitochondrial carrier, adenine nucleotide translocator), member 5 [Source:MGI Symbol;Acc:MGI:1353496]	-	-
ENSMUSG00000022139	3287	4284	4080	4133	4558	2629	5837	7366	5571	6478	3778	4613	3846	3190	4521	Mbnl2	14	120275669	120431697	+	11993	protein_coding	muscleblind like splicing factor 2 [Source:MGI Symbol;Acc:MGI:2145597]	C3H	C3H
ENSMUSG00000027706	5603	4644	5342	5198	3993	3551	3961	4624	4358	4680	5338	4214	4034	4429	4183	Sec62	3	30792875	30821263	+	4343	protein_coding	SEC62 homolog (S. cerevisiae) [Source:MGI Symbol;Acc:MGI:1916526]	-	-
ENSMUSG00000035530	2279	5235	3994	5116	5020	5074	4144	4570	4362	4811	2618	4904	5675	5066	5268	Eif1	11	100319885	100322096	+	2098	protein_coding	eukaryotic translation initiation factor 1 [Source:MGI Symbol;Acc:MGI:105125]	-	-
ENSMUSG00000094483	4277	4651	5125	4801	4873	2567	4273	4926	4607	4671	5783	4734	3843	4146	4684	Purb	11	6467599	6475917	-	8319	protein_coding	purine rich element binding protein B [Source:MGI Symbol;Acc:MGI:1338779]	-	-
ENSMUSG00000032009	4297	3739	5484	5949	2963	2009	4264	4931	4864	4392	9887	5947	2926	3285	2848	Sesn3	9	14275067	14333101	+	15269	protein_coding	sestrin 3 [Source:MGI Symbol;Acc:MGI:1922997]	-	-
ENSMUSG00000022003	3184	6157	3794	5005	3763	4105	5931	6005	5716	5508	2838	2870	2374	5754	4623	Slc25a30	14	75760117	75787037	-	4571	protein_coding	solute carrier family 25, member 30 [Source:MGI Symbol;Acc:MGI:1914804]	-	-
ENSMUSG00000031246	4361	4310	4565	3814	4145	2656	5006	5022	4508	5172	5022	4243	5267	4065	5466	Sh3bgrl	X	109095365	109197873	+	3298	protein_coding	SH3-binding domain glutamic acid-rich protein like [Source:MGI Symbol;Acc:MGI:1930849]	-	-
ENSMUSG00000034648	3054	5451	6928	10142	2463	1611	3209	2486	4123	2402	8054	8986	1789	5030	1886	Lrrn1	6	107529768	107570214	+	3700	protein_coding	leucine rich repeat protein 1, neuronal [Source:MGI Symbol;Acc:MGI:106038]	-	-
ENSMUSG00000035901	4976	4336	4281	3868	4220	3411	5404	5562	5835	5320	3962	4066	3799	3478	4959	Dennd5a	7	109893780	109960470	-	8677	protein_coding	DENN/MADD domain containing 5A [Source:MGI Symbol;Acc:MGI:1201681]	-	-
ENSMUSG00000031818	2568	4198	4636	4140	4759	6070	4753	4847	4574	4676	4071	4322	5009	3768	5062	Cox4i1	8	120668222	120674207	+	1550	protein_coding	cytochrome c oxidase subunit 4I1 [Source:MGI Symbol;Acc:MGI:88473]	-	-
ENSMUSG00000032786	1698	4349	2650	3084	2715	6622	8939	10620	6399	8610	2008	1543	3381	1902	2850	Alas1	9	106233455	106248654	-	6174	protein_coding	aminolevulinic acid synthase 1 [Source:MGI Symbol;Acc:MGI:87989]	-	-
ENSMUSG00000039910	6282	5537	4043	2668	5618	2985	5170	4936	5579	5090	2881	3795	3137	4562	5035	Cited2	10	17723218	17725674	+	2457	protein_coding	Cbp/p300-interacting transactivator, with Glu/Asp-rich carboxy-terminal domain, 2 [Source:MGI Symbol;Acc:MGI:1306784]	-	-
ENSMUSG00000030096	4447	5714	5575	6712	4711	2174	4027	3274	3409	3204	6873	5017	3068	5476	3577	Slc6a6	6	91684053	91759066	+	8457	protein_coding	solute carrier family 6 (neurotransmitter transporter, taurine), member 6 [Source:MGI Symbol;Acc:MGI:98488]	-	-
ENSMUSG00000020422	4400	4550	5517	5641	5161	2272	3799	3294	4436	2826	8680	6096	3673	4070	2842	Tns3	11	8431652	8664535	-	11182	protein_coding	tensin 3 [Source:MGI Symbol;Acc:MGI:2443012]	-	-
ENSMUSG00000056091	4290	3065	4420	3942	6148	4319	4081	6209	4131	5597	3223	3753	3785	4065	6128	St3gal5	6	72097592	72154571	+	2618	protein_coding	ST3 beta-galactoside alpha-2,3-sialyltransferase 5 [Source:MGI Symbol;Acc:MGI:1339963]	-	-
ENSMUSG00000024098	4045	4626	4614	3608	4621	3182	5681	4835	5426	4570	4341	3772	4891	3562	5275	Twsg1	17	65921972	65951226	-	5153	protein_coding	twisted gastrulation BMP signaling modulator 1 [Source:MGI Symbol;Acc:MGI:2137520]	-	-
ENSMUSG00000021877	2996	5138	5103	5185	4513	3457	3943	4337	3998	4227	3885	4292	5580	4905	5371	Arf4	14	26638074	26665084	+	3603	protein_coding	ADP-ribosylation factor 4 [Source:MGI Symbol;Acc:MGI:99433]	-	-
ENSMUSG00000028249	3760	5142	4793	4216	3916	3178	4874	4670	4925	4777	4671	4269	5016	3785	4886	Sdcbp	4	6365650	6408423	+	6904	protein_coding	syndecan binding protein [Source:MGI Symbol;Acc:MGI:1337026]	-	-
ENSMUSG00000036620	3634	4997	4745	3822	5493	3861	4687	5211	5148	5277	3223	3479	4039	3779	5426	Mgat4b	11	50210890	50235103	+	2719	protein_coding	mannoside acetylglucosaminyltransferase 4, isoenzyme B [Source:MGI Symbol;Acc:MGI:2143974]	-	-
ENSMUSG00000047187	3423	4677	4244	4190	4034	4097	5059	5229	5430	5481	3946	3911	4210	4189	4537	Rab2a	4	8535644	8607778	+	2133	protein_coding	RAB2A, member RAS oncogene family [Source:MGI Symbol;Acc:MGI:1928750]	-	-
ENSMUSG00000034926	4819	3731	3115	2349	2509	3247	7833	10183	7042	10271	3616	1797	1861	1704	2494	Dhcr24	4	106561038	106589113	+	4028	protein_coding	24-dehydrocholesterol reductase [Source:MGI Symbol;Acc:MGI:1922004]	-	-
ENSMUSG00000039115	5170	3905	4477	3940	3758	2399	6601	5585	6528	5662	5462	3859	2513	2902	3519	Itga9	9	118606690	118901003	+	7691	protein_coding	integrin alpha 9 [Source:MGI Symbol;Acc:MGI:104756]	-	-
ENSMUSG00000032328	3814	4782	4259	4448	3963	3038	5014	5417	5047	5469	3675	3844	3957	4192	5358	Tmem30a	9	79768943	79793507	-	5646	protein_coding	transmembrane protein 30A [Source:MGI Symbol;Acc:MGI:106402]	-	-
ENSMUSG00000025351	4091	5517	4448	4095	4222	5337	4131	3267	4280	3784	2909	3786	5691	5337	5367	Cd63	10	128900989	128912822	+	3682	protein_coding	CD63 antigen [Source:MGI Symbol;Acc:MGI:99529]	-	-
ENSMUSG00000032966	3277	5966	4829	5275	4506	3558	3846	3886	3931	3806	3167	4468	5098	5293	5317	Fkbp1a	2	151542483	151561692	+	3857	protein_coding	FK506 binding protein 1a [Source:MGI Symbol;Acc:MGI:95541]	-	-
ENSMUSG00000029076	3205	4238	4201	3685	4019	4355	5541	6079	5638	6192	3837	3893	3374	3441	4484	Sdf4	4	155992872	156013610	+	6115	protein_coding	stromal cell derived factor 4 [Source:MGI Symbol;Acc:MGI:108079]	-	-
ENSMUSG00000028936	2501	4134	4164	4818	4285	3919	4378	4563	4182	4372	4023	5242	4906	4372	6270	Rpl22	4	152325742	152334071	+	2911	protein_coding	ribosomal protein L22 [Source:MGI Symbol;Acc:MGI:99262]	-	-
ENSMUSG00000063358	3515	5063	4271	4725	3671	2784	5145	5335	5380	5426	4230	4356	3482	4030	4709	Mapk1	16	16983382	17047453	+	7110	protein_coding	mitogen-activated protein kinase 1 [Source:MGI Symbol;Acc:MGI:1346858]	-	-
ENSMUSG00000046330	2466	4443	4278	4966	5577	5241	3938	4019	3638	3845	3044	4967	5429	4247	5770	Rpl37a	1	72711290	72713813	+	1410	protein_coding	ribosomal protein L37a [Source:MGI Symbol;Acc:MGI:98068]	-	-
ENSMUSG00000019179	3459	5049	4398	4303	4976	4757	4237	5065	4370	4952	2911	3974	3982	4378	5022	Mdh2	5	135778480	135790398	+	3562	protein_coding	malate dehydrogenase 2, NAD (mitochondrial) [Source:MGI Symbol;Acc:MGI:97050]	-	-
ENSMUSG00000062078	4193	4403	4555	3966	4018	2565	4804	5383	4939	5167	4602	4378	4596	3516	4698	Qk	17	10202601	10319854	-	14242	protein_coding	quaking [Source:MGI Symbol;Acc:MGI:97837]	-	-
ENSMUSG00000029840	3783	4788	4930	4426	3858	2515	4437	4760	4437	4899	5206	4397	4532	3773	5015	Mtpn	6	35508906	35539888	-	3960	protein_coding	myotrophin [Source:MGI Symbol;Acc:MGI:99445]	-	-
ENSMUSG00000000346	3177	4162	4291	3677	4198	3702	5305	5116	4901	4875	3957	4362	4847	4196	4930	Dazap2	15	100615349	100620761	+	2900	protein_coding	DAZ associated protein 2 [Source:MGI Symbol;Acc:MGI:1344344]	-	-
ENSMUSG00000024997	3567	5190	4763	4070	3686	3916	5263	5320	5305	5826	2640	3522	3763	4037	4803	Prdx3	19	60864051	60874556	-	1478	protein_coding	peroxiredoxin 3 [Source:MGI Symbol;Acc:MGI:88034]	-	-
ENSMUSG00000030168	3775	3460	3438	2959	3937	4477	6639	8332	5923	8689	3006	2334	2470	2834	3348	Adipor2	6	119353150	119417704	-	5979	protein_coding	adiponectin receptor 2 [Source:MGI Symbol;Acc:MGI:93830]	-	-
ENSMUSG00000060373	3741	5725	5054	5820	4275	2924	3353	3832	3778	4029	4052	4468	4018	4677	5769	Hnrnpc	14	52073377	52104028	-	4322	protein_coding	heterogeneous nuclear ribonucleoprotein C [Source:MGI Symbol;Acc:MGI:107795]	-	-
ENSMUSG00000029106	4294	4619	4346	4148	4101	3394	4832	4606	4859	4808	4806	4339	3564	4015	4645	Add1	5	34573664	34632308	+	8561	protein_coding	adducin 1 (alpha) [Source:MGI Symbol;Acc:MGI:87918]	-	-
ENSMUSG00000032376	3976	3733	3964	3433	3815	4602	5446	6953	6618	6320	3449	3024	2650	3529	3669	Usp3	9	66514637	66593142	-	6848	protein_coding	ubiquitin specific peptidase 3 [Source:MGI Symbol;Acc:MGI:2152450]	-	-
ENSMUSG00000071172	3339	5269	3939	4655	4303	3681	3788	3938	3769	4180	3276	4655	4690	5782	5915	Srsf3	17	29032628	29043373	+	7899	protein_coding	serine/arginine-rich splicing factor 3 [Source:MGI Symbol;Acc:MGI:98285]	-	-
ENSMUSG00000026103	2129	3929	3367	4401	5511	2924	3398	3537	3467	3225	3475	7064	6872	6030	5804	Gls	1	52163448	52233232	-	15057	protein_coding	glutaminase [Source:MGI Symbol;Acc:MGI:95752]	-	-
ENSMUSG00000024921	4036	3443	3934	3353	3679	3956	5531	5645	5895	5699	4410	3871	3897	3699	3853	Smarca2	19	26605050	26778322	+	14269	protein_coding	SWI/SNF related, matrix associated, actin dependent regulator of chromatin, subfamily a, member 2 [Source:MGI Symbol;Acc:MGI:99603]	SNF2	SNF2
ENSMUSG00000024392	4277	4262	3904	3714	4791	4235	4775	5083	4917	4622	4488	3876	3384	4122	4444	Bag6	17	35135178	35147322	+	6215	protein_coding	BCL2-associated athanogene 6 [Source:MGI Symbol;Acc:MGI:1919439]	-	-
ENSMUSG00000006998	4426	5029	4564	4410	4090	3116	4509	4815	4654	4617	5280	4050	2922	3803	4532	Psmd2	16	20651652	20663414	+	4038	protein_coding	proteasome (prosome, macropain) 26S subunit, non-ATPase, 2 [Source:MGI Symbol;Acc:MGI:1096584]	-	-
ENSMUSG00000029478	4782	3775	3595	2868	4706	4240	6115	6256	5928	5527	4354	3122	2906	3197	3439	Ncor2	5	125017153	125179219	-	10490	protein_coding	nuclear receptor co-repressor 2 [Source:MGI Symbol;Acc:MGI:1337080]	MYB-related	MYB->MYB-related
ENSMUSG00000031422	2986	5248	4741	5076	5274	2983	3550	4578	3621	4202	3307	4248	4559	4843	5518	Morf4l2	X	136732942	136743690	-	3135	protein_coding	mortality factor 4 like 2 [Source:MGI Symbol;Acc:MGI:1927167]	-	-
ENSMUSG00000033610	4210	3570	2604	2295	2104	4025	8040	8834	7131	10055	1780	2198	1819	2536	3520	Pank1	19	34810894	34879455	-	3692	protein_coding	pantothenate kinase 1 [Source:MGI Symbol;Acc:MGI:1922985]	-	-
ENSMUSG00000033685	2830	3939	4302	4619	5282	3853	4046	2644	3505	3205	5602	4579	6413	4272	5620	Ucp2	7	100493337	100502020	+	6989	protein_coding	uncoupling protein 2 (mitochondrial, proton carrier) [Source:MGI Symbol;Acc:MGI:109354]	-	-
ENSMUSG00000075700	3134	4977	4794	4947	3565	2851	4705	4976	4939	5212	4174	3903	3860	3953	4601	Selenot	3	58576636	58593133	+	3436	protein_coding	selenoprotein T [Source:MGI Symbol;Acc:MGI:1916477]	-	-
ENSMUSG00000029063	3098	5004	4232	4686	3955	4207	5558	5080	5732	5319	3476	3259	2976	3917	4068	Nadk	4	155562378	155591001	+	3747	protein_coding	NAD kinase [Source:MGI Symbol;Acc:MGI:2183149]	-	-
ENSMUSG00000030357	3371	4796	4278	3532	5238	4616	4337	6373	4491	5618	3763	3282	3188	3473	4077	Fkbp4	6	128429735	128438677	-	2795	protein_coding	FK506 binding protein 4 [Source:MGI Symbol;Acc:MGI:95543]	-	-
ENSMUSG00000024335	3482	4417	4047	3988	4649	3681	4753	5418	5023	4977	3713	4325	3716	3576	4460	Brd2	17	34112023	34122634	-	7285	protein_coding	bromodomain containing 2 [Source:MGI Symbol;Acc:MGI:99495]	-	-
ENSMUSG00000022231	5318	3136	4978	3688	6908	1437	2632	2798	2754	2169	5330	6113	5667	4012	7227	Sema5a	15	32244810	32696341	+	18686	protein_coding	sema domain, seven thrombospondin repeats (type 1 and type 1-like), transmembrane domain (TM) and short cytoplasmic domain, (semaphorin) 5A [Source:MGI Symbol;Acc:MGI:107556]	-	-
ENSMUSG00000055053	5359	4762	3776	3295	3605	4368	5866	6046	5482	5372	3850	3045	2852	3009	3457	Nfic	10	81396186	81455635	-	6630	protein_coding	nuclear factor I/C [Source:MGI Symbol;Acc:MGI:109591]	-	-
ENSMUSG00000020594	4445	4725	4387	4283	4025	2784	4476	4589	4346	4216	4643	4289	4269	4204	4449	Pum2	12	8674134	8752581	+	7260	protein_coding	pumilio RNA-binding family member 2 [Source:MGI Symbol;Acc:MGI:1931751]	-	-
ENSMUSG00000024610	2429	2726	4034	4683	4006	4662	5939	5519	4685	5599	4090	4888	4364	2358	4026	Cd74	18	60803848	60812646	+	1410	protein_coding	CD74 antigen (invariant polypeptide of major histocompatibility complex, class II antigen-associated) [Source:MGI Symbol;Acc:MGI:96534]	-	-
ENSMUSG00000081895	3720	3685	3899	5285	3002	4324	3567	3800	3846	2656	3766	4336	6086	5065	6745	Rpl17-ps10	7	72648757	72649311	-	555	processed_pseudogene	ribosomal protein L17, pseudogene 10 [Source:MGI Symbol;Acc:MGI:3642871]	-	-
ENSMUSG00000030007	4410	5229	4289	4405	4525	3777	3492	3694	3897	3662	4510	4354	3377	4851	5219	Cct7	6	85451514	85468475	+	6778	protein_coding	chaperonin containing Tcp1, subunit 7 (eta) [Source:MGI Symbol;Acc:MGI:107184]	-	-
ENSMUSG00000028995	4120	6887	5181	6866	2606	1875	3752	2578	4131	3133	7237	5693	2082	4836	2680	Fam126a	5	23915276	24030690	-	10117	protein_coding	family with sequence similarity 126, member A [Source:MGI Symbol;Acc:MGI:2149839]	-	-
ENSMUSG00000038733	3888	4466	4152	4045	3701	2748	4826	4944	4887	4720	4756	4411	3700	4046	4303	Wdr26	1	181173228	181211552	-	7848	protein_coding	WD repeat domain 26 [Source:MGI Symbol;Acc:MGI:1923825]	-	-
ENSMUSG00000031604	2494	4050	3157	4388	2516	4394	6425	8325	6029	8564	2112	2573	2099	3198	3006	Msmo1	8	64718139	64733792	-	6144	protein_coding	methylsterol monoxygenase 1 [Source:MGI Symbol;Acc:MGI:1913484]	-	-
ENSMUSG00000021395	3586	4029	3675	4033	3594	2923	4349	4535	4434	4008	4835	4759	5097	3965	5331	Spin1	13	51100880	51152546	+	4498	protein_coding	spindlin 1 [Source:MGI Symbol;Acc:MGI:109242]	-	-
ENSMUSG00000028211	7294	4287	4255	3140	3798	2751	4644	5633	5377	5842	3726	3426	2698	2954	3309	Trp53inp1	4	11156431	11174379	+	6475	protein_coding	transformation related protein 53 inducible nuclear protein 1 [Source:MGI Symbol;Acc:MGI:1926609]	-	-
ENSMUSG00000022477	4100	4200	4444	3584	4140	3990	4569	5086	4774	4968	4318	3723	2829	4063	4266	Aco2	15	81872309	81915133	+	4302	protein_coding	aconitase 2, mitochondrial [Source:MGI Symbol;Acc:MGI:87880]	-	-
ENSMUSG00000030824	3851	5255	4112	4259	4030	3655	4068	3205	4016	3450	4787	4161	3853	4896	5292	Nucb1	7	45490458	45510406	-	8212	protein_coding	nucleobindin 1 [Source:MGI Symbol;Acc:MGI:97388]	-	-
ENSMUSG00000004455	3203	5318	4139	5140	3419	3143	4575	4388	4752	4592	4234	4213	2776	4795	4049	Ppp1cc	5	122158278	122175273	+	3424	protein_coding	protein phosphatase 1 catalytic subunit gamma [Source:MGI Symbol;Acc:MGI:104872]	-	-
ENSMUSG00000017756	3507	4268	4746	4846	4351	3334	3478	5068	4283	4697	5586	3732	2832	4100	3900	Slc12a7	13	73733094	73816754	+	12669	protein_coding	solute carrier family 12, member 7 [Source:MGI Symbol;Acc:MGI:1342283]	-	-
ENSMUSG00000022565	4669	3865	3559	2594	4464	4266	5662	5240	5462	4677	5237	3325	3519	3071	3081	Plec	15	76170974	76232574	-	18113	protein_coding	plectin [Source:MGI Symbol;Acc:MGI:1277961]	-	-
ENSMUSG00000027177	4173	4454	4072	3999	3499	2278	5300	4788	4807	4412	4958	4332	4127	3207	4282	Hipk3	2	104426481	104494446	-	7987	protein_coding	homeodomain interacting protein kinase 3 [Source:MGI Symbol;Acc:MGI:1314882]	-	-
ENSMUSG00000028745	4014	4252	4609	3796	4351	4061	4005	4348	4150	4357	4054	3573	4354	3874	4833	Capzb	4	139192899	139291818	+	3299	protein_coding	capping protein (actin filament) muscle Z-line, beta [Source:MGI Symbol;Acc:MGI:104652]	-	-
ENSMUSG00000020483	3980	4004	4292	3410	3736	4079	4954	6530	5320	5743	4775	3029	2551	2626	3530	Dynll2	11	87979525	87987533	-	2736	protein_coding	dynein light chain LC8-type 2 [Source:MGI Symbol;Acc:MGI:1915347]	-	-
ENSMUSG00000020091	5521	4498	4054	3648	3558	2835	4728	4718	4727	4422	5327	3812	3347	3257	4082	Eif4ebp2	10	61428491	61452661	-	5784	protein_coding	eukaryotic translation initiation factor 4E binding protein 2 [Source:MGI Symbol;Acc:MGI:109198]	-	-
ENSMUSG00000026888	4175	3660	4234	4186	6210	2876	2516	3265	2915	2575	2358	6669	5430	4970	6445	Grb14	2	64912476	65024987	-	7185	protein_coding	growth factor receptor bound protein 14 [Source:MGI Symbol;Acc:MGI:1355324]	-	-
ENSMUSG00000070493	2823	4618	3955	4501	4260	4208	4615	4780	4534	4539	3176	3732	3736	4200	4671	Chchd2	5	129881156	129887470	-	2269	protein_coding	coiled-coil-helix-coiled-coil-helix domain containing 2 [Source:MGI Symbol;Acc:MGI:1261428]	-	-
ENSMUSG00000019978	2779	3909	4519	4240	5298	3458	4398	4171	5791	3955	3506	4421	4075	3816	3937	Epb41l2	10	25359798	25523519	+	11843	protein_coding	erythrocyte membrane protein band 4.1 like 2 [Source:MGI Symbol;Acc:MGI:103009]	-	-
ENSMUSG00000025613	3715	4959	4394	4797	4249	3538	3012	3384	3434	3407	3443	4586	4479	5382	5405	Cct8	16	87483326	87495873	-	3088	protein_coding	chaperonin containing Tcp1, subunit 8 (theta) [Source:MGI Symbol;Acc:MGI:107183]	-	-
ENSMUSG00000036438	2433	4848	3969	4591	4053	3495	3977	4276	3374	4505	3337	4861	4357	4414	5555	Calm2	17	87433412	87446935	-	1467	protein_coding	calmodulin 2 [Source:MGI Symbol;Acc:MGI:103250]	-	-
ENSMUSG00000005397	3941	4682	3933	3317	3768	2782	4967	4549	5289	4475	3893	4025	4115	3786	4450	Nid1	13	13437551	13512269	+	6943	protein_coding	nidogen 1 [Source:MGI Symbol;Acc:MGI:97342]	-	-
ENSMUSG00000026074	4544	4354	4421	4018	4347	2544	4107	4062	4265	3778	4635	5102	3696	3946	4147	Map4k4	1	39900913	40026310	+	9579	protein_coding	mitogen-activated protein kinase kinase kinase kinase 4 [Source:MGI Symbol;Acc:MGI:1349394]	-	-
ENSMUSG00000022463	3949	3930	4086	3342	3939	3972	5250	6464	5532	6157	3816	3077	2411	2826	3206	Srebf2	15	82147181	82205379	+	7184	protein_coding	sterol regulatory element binding factor 2 [Source:MGI Symbol;Acc:MGI:107585]	bHLH	bHLH
ENSMUSG00000028399	5902	2986	3612	3228	4256	3081	4143	4197	3908	4447	3312	5016	5062	3559	5186	Ptprd	4	75941238	78211961	-	22822	protein_coding	protein tyrosine phosphatase, receptor type, D [Source:MGI Symbol;Acc:MGI:97812]	-	-
ENSMUSG00000021794	4098	4290	3976	3644	4089	3549	4370	4798	4332	4733	3146	3899	4329	3700	4892	Glud1	14	34310727	34345265	+	4210	protein_coding	glutamate dehydrogenase 1 [Source:MGI Symbol;Acc:MGI:95753]	-	-
ENSMUSG00000025781	3092	4649	4304	5049	3949	4400	3817	3974	3954	4252	3216	4140	3680	4417	4923	Atp5c1	2	10056016	10080510	-	1908	protein_coding	ATP synthase, H+ transporting, mitochondrial F1 complex, gamma polypeptide 1 [Source:MGI Symbol;Acc:MGI:1261437]	-	-
ENSMUSG00000022312	3539	3981	4630	4231	4312	3845	3592	3770	3643	3758	3855	4043	4752	4317	5492	Eif3h	15	51786558	51865523	-	1612	protein_coding	eukaryotic translation initiation factor 3, subunit H [Source:MGI Symbol;Acc:MGI:1915385]	-	-
ENSMUSG00000041168	4203	4821	4117	3665	3675	4104	4679	5366	5224	5218	3685	3355	2326	3654	3640	Lonp1	17	56614297	56626887	-	4374	protein_coding	lon peptidase 1, mitochondrial [Source:MGI Symbol;Acc:MGI:1921392]	-	-
ENSMUSG00000029231	3073	3835	3090	2924	2858	5052	6700	5362	5562	5404	3278	3033	4161	3452	3899	Pdgfra	5	75152292	75198215	+	10024	protein_coding	platelet derived growth factor receptor, alpha polypeptide [Source:MGI Symbol;Acc:MGI:97530]	-	-
ENSMUSG00000007739	3864	4846	4444	4369	3892	2654	3360	3353	3615	3725	4451	4587	4528	4320	5639	Cct4	11	22990519	23003780	+	4201	protein_coding	chaperonin containing Tcp1, subunit 4 (delta) [Source:MGI Symbol;Acc:MGI:104689]	-	-
ENSMUSG00000019188	3958	4728	4616	3563	4462	4177	3782	3690	4091	3806	4359	3681	3533	4619	4572	H13	2	152669461	152708670	+	8884	protein_coding	histocompatibility 13 [Source:MGI Symbol;Acc:MGI:95886]	-	-
ENSMUSG00000046982	5029	4019	4843	4759	4380	2343	3220	3115	3139	2776	5055	4759	4361	4803	4928	Tshz1	18	84011627	84086404	-	5656	protein_coding	teashirt zinc finger family member 1 [Source:MGI Symbol;Acc:MGI:1346031]	C2H2	C2H2
ENSMUSG00000063856	2866	4660	3570	3751	3276	4492	6244	4667	6092	5176	3324	3029	3587	3066	3714	Gpx1	9	108338903	108340343	+	1441	protein_coding	glutathione peroxidase 1 [Source:MGI Symbol;Acc:MGI:104887]	-	-
ENSMUSG00000066306	5702	3496	3677	2885	4029	3222	4624	5069	4795	4065	5678	3782	3158	3210	4120	Numa1	7	101934111	102014964	+	7919	protein_coding	nuclear mitotic apparatus protein 1 [Source:MGI Symbol;Acc:MGI:2443665]	-	-
ENSMUSG00000025508	2306	3875	3807	4106	4871	4034	4325	4359	4137	3913	3595	4566	4540	3470	5502	Rplp2	7	141447370	141451585	+	2072	protein_coding	ribosomal protein, large P2 [Source:MGI Symbol;Acc:MGI:1914436]	-	-
ENSMUSG00000024073	5224	4211	4432	4219	3400	2816	4073	4445	4326	4580	5329	3718	3053	3713	3835	Birc6	17	74528295	74703356	+	28830	protein_coding	baculoviral IAP repeat-containing 6 [Source:MGI Symbol;Acc:MGI:1276108]	-	-
ENSMUSG00000069516	1070	4412	3990	6775	2911	2421	6079	3354	2964	5036	3068	7270	3806	2848	5313	Lyz2	10	117277331	117282321	-	1316	protein_coding	lysozyme 2 [Source:MGI Symbol;Acc:MGI:96897]	-	-
ENSMUSG00000013663	7919	4047	4196	3091	2786	2230	4937	4942	4777	5399	4810	3108	2713	2813	3547	Pten	19	32757497	32826160	+	11507	protein_coding	phosphatase and tensin homolog [Source:MGI Symbol;Acc:MGI:109583]	-	-
ENSMUSG00000056429	4555	4616	3961	3914	3538	2421	5049	5444	5031	5065	4054	3321	2862	3269	4162	Tgoln1	6	72608432	72617000	-	5013	protein_coding	trans-golgi network protein [Source:MGI Symbol;Acc:MGI:105080]	-	-
ENSMUSG00000032018	1842	3416	2795	3265	3471	4226	6742	8152	6384	8550	1304	2233	3299	2399	3170	Sc5d	9	42251595	42264256	-	4866	protein_coding	sterol-C5-desaturase [Source:MGI Symbol;Acc:MGI:1353611]	-	-
ENSMUSG00000001729	2880	4474	4074	3588	4767	3632	4978	5250	4757	4933	3878	3610	3254	2920	4210	Akt1	12	112653821	112674884	-	4098	protein_coding	thymoma viral proto-oncogene 1 [Source:MGI Symbol;Acc:MGI:87986]	-	-
ENSMUSG00000090862	1960	4207	4024	4301	4135	4256	3504	3982	3506	3520	3129	5370	5055	4356	5853	Rps13	7	116331505	116334195	-	2691	protein_coding	ribosomal protein S13 [Source:MGI Symbol;Acc:MGI:1915302]	-	-
ENSMUSG00000032437	3725	4427	4215	3970	3625	2646	4169	4267	4106	4311	5696	3626	3905	3794	4673	Stt3b	9	115242581	115310421	-	4221	protein_coding	STT3, subunit of the oligosaccharyltransferase complex, homolog B (S. cerevisiae) [Source:MGI Symbol;Acc:MGI:1915542]	-	-
ENSMUSG00000042506	4891	3917	5066	5369	3875	2090	3134	3696	3389	2944	6662	4757	3233	4138	3971	Usp22	11	61151785	61175055	-	4886	protein_coding	ubiquitin specific peptidase 22 [Source:MGI Symbol;Acc:MGI:2144157]	-	-
ENSMUSG00000020402	2862	4569	3955	4243	4110	3382	4361	4323	4457	4228	4001	3817	4069	3882	4693	Vdac1	11	52360860	52389397	+	2620	protein_coding	voltage-dependent anion channel 1 [Source:MGI Symbol;Acc:MGI:106919]	-	-
ENSMUSG00000038648	4865	3631	4197	3231	4948	2211	4087	4130	3931	3948	5106	3980	3834	3530	5202	Creb3l2	6	37327255	37442146	-	7283	protein_coding	cAMP responsive element binding protein 3-like 2 [Source:MGI Symbol;Acc:MGI:2442695]	bZIP	bZIP
ENSMUSG00000031065	4017	4217	3946	3444	4264	3821	4415	4925	4555	4911	3721	3473	3375	3388	4319	Cdk16	X	20687954	20699880	+	4378	protein_coding	cyclin-dependent kinase 16 [Source:MGI Symbol;Acc:MGI:97516]	-	-
ENSMUSG00000025268	3648	4078	4108	3741	4552	4156	3836	4233	4891	4271	3063	3571	3464	4559	4584	Maged2	X	150806370	150814345	-	3239	protein_coding	melanoma antigen, family D, 2 [Source:MGI Symbol;Acc:MGI:1933391]	-	-
ENSMUSG00000008393	3469	3771	4295	4859	4569	2169	2838	3384	2710	3126	5458	5173	4665	4454	5773	Carhsp1	16	8658580	8672155	-	2858	protein_coding	calcium regulated heat stable protein 1 [Source:MGI Symbol;Acc:MGI:1196368]	CSD	CSD
ENSMUSG00000033965	2882	3702	4272	3918	2308	3623	6265	5456	6919	5718	5148	3546	1903	2774	2249	Slc16a2	X	103697414	103821983	-	4263	protein_coding	solute carrier family 16 (monocarboxylic acid transporters), member 2 [Source:MGI Symbol;Acc:MGI:1203732]	-	-
ENSMUSG00000005683	3636	4232	4490	3840	3947	3800	4078	4816	4391	4817	4035	3801	3165	3563	4015	Cs	10	128337734	128362479	+	5779	protein_coding	citrate synthase [Source:MGI Symbol;Acc:MGI:88529]	-	-
ENSMUSG00000006676	2995	4437	3343	3866	3523	4047	5515	5399	5381	4809	3738	3517	2839	3492	3697	Usp19	9	108490602	108502337	+	7048	protein_coding	ubiquitin specific peptidase 19 [Source:MGI Symbol;Acc:MGI:1918722]	-	-
ENSMUSG00000028364	2849	5015	4431	1223	8254	3351	3947	2618	9085	3096	2033	1798	4801	4162	3930	Tnc	4	63959785	64047015	-	7772	protein_coding	tenascin C [Source:MGI Symbol;Acc:MGI:101922]	-	-
ENSMUSG00000028382	4465	3703	4358	4232	4264	1323	3121	3072	2748	2946	6051	5480	4697	3766	6312	Ptbp3	4	59471868	59549364	-	7480	protein_coding	polypyrimidine tract binding protein 3 [Source:MGI Symbol;Acc:MGI:1923334]	-	-
ENSMUSG00000007613	3278	4501	4636	5753	3595	2433	3725	4136	4057	3595	5699	4533	2961	4076	3539	Tgfbr1	4	47353222	47414931	+	6534	protein_coding	transforming growth factor, beta receptor I [Source:MGI Symbol;Acc:MGI:98728]	-	-
ENSMUSG00000085438	4423	3931	3871	3467	3443	2290	5099	4930	4927	5002	5062	4123	3066	3243	3564	1700020I14Rik	2	119594297	119607502	+	8306	lincRNA	RIKEN cDNA 1700020I14 gene [Source:MGI Symbol;Acc:MGI:1913852]	-	-
ENSMUSG00000020841	4059	3327	3680	2558	3362	2260	4715	4217	4137	3944	8647	3479	4432	3141	4378	Cpd	11	76778424	76847018	-	8332	protein_coding	carboxypeptidase D [Source:MGI Symbol;Acc:MGI:107265]	-	-
ENSMUSG00000030861	4591	3275	3940	2851	3806	3465	5193	5918	5956	5798	2812	2835	3387	2689	3814	Acadsb	7	131410601	131448944	+	7179	protein_coding	acyl-Coenzyme A dehydrogenase, short/branched chain [Source:MGI Symbol;Acc:MGI:1914135]	-	-
ENSMUSG00000022013	3984	4821	3440	2831	3161	4699	4973	5165	5289	5311	2221	2665	3096	4107	4502	Dnajc15	14	77820681	77875125	-	6513	protein_coding	DnaJ heat shock protein family (Hsp40) member C15 [Source:MGI Symbol;Acc:MGI:1913398]	-	-
ENSMUSG00000026421	3608	5290	3969	2800	3616	2735	6581	4081	4044	4151	7224	2691	3712	2033	3712	Csrp1	1	135720061	135752232	+	1956	protein_coding	cysteine and glycine-rich protein 1 [Source:MGI Symbol;Acc:MGI:88549]	LIM	LIM
ENSMUSG00000031835	3284	3849	3690	3776	4596	3110	4099	4650	4323	4296	4077	4161	3432	3821	5035	Mbtps1	8	119508156	119558735	-	10539	protein_coding	membrane-bound transcription factor peptidase, site 1 [Source:MGI Symbol;Acc:MGI:1927235]	-	-
ENSMUSG00000018846	2741	4066	3769	4162	3354	2921	4818	5771	5456	6314	3664	3432	3296	3038	3308	Pank3	11	35769484	35791285	+	7376	protein_coding	pantothenate kinase 3 [Source:MGI Symbol;Acc:MGI:2387464]	-	-
ENSMUSG00000038274	2504	3503	4011	3844	5152	5107	4556	4303	3762	3893	3505	4080	4059	3275	4551	Fau	19	6057888	6059524	+	815	protein_coding	Finkel-Biskis-Reilly murine sarcoma virus (FBR-MuSV) ubiquitously expressed (fox derived) [Source:MGI Symbol;Acc:MGI:102547]	-	-
ENSMUSG00000026193	3628	4269	5809	4905	4455	766	6033	1535	2271	2472	8913	3232	5175	3011	3571	Fn1	1	71585520	71653200	-	11685	protein_coding	fibronectin 1 [Source:MGI Symbol;Acc:MGI:95566]	-	-
ENSMUSG00000040225	5181	3994	3813	3747	3385	2472	4484	4661	4571	4329	5319	3619	3381	3470	3431	Prrc2c	1	162670725	162740556	-	16092	protein_coding	proline-rich coiled-coil 2C [Source:MGI Symbol;Acc:MGI:1913754]	-	-
ENSMUSG00000009470	3770	3999	3742	3851	3392	2288	5013	4732	4709	4805	5171	3544	3569	3175	4020	Tnpo1	13	98839019	98926384	-	11212	protein_coding	transportin 1 [Source:MGI Symbol;Acc:MGI:2681523]	-	-
ENSMUSG00000059495	5153	3866	3620	3549	2702	2823	6038	5805	5418	5391	5002	2757	2155	2455	3026	Arhgef12	9	42963842	43107239	-	13620	protein_coding	Rho guanine nucleotide exchange factor (GEF) 12 [Source:MGI Symbol;Acc:MGI:1916882]	-	-
ENSMUSG00000020745	3519	4223	4352	4288	3246	2473	4482	4793	4471	4644	4569	3965	3292	3447	3917	Pafah1b1	11	74673949	74724670	-	9620	protein_coding	platelet-activating factor acetylhydrolase, isoform 1b, subunit 1 [Source:MGI Symbol;Acc:MGI:109520]	-	-
ENSMUSG00000053646	4305	4207	3718	3100	3583	3816	4694	4828	5334	4818	4707	2899	2086	4088	3483	Plxnb1	9	109095389	109119917	+	9592	protein_coding	plexin B1 [Source:MGI Symbol;Acc:MGI:2154238]	-	-
ENSMUSG00000041220	3730	3124	4300	4309	4910	2629	3997	7982	4211	6892	2756	2755	2078	2449	3533	Elovl6	3	129532355	129638495	+	6431	protein_coding	ELOVL family member 6, elongation of long chain fatty acids (yeast) [Source:MGI Symbol;Acc:MGI:2156528]	-	-
ENSMUSG00000032116	3344	4448	4128	3961	3975	2564	3960	4410	4074	4169	4023	3954	3710	3799	5130	Stt3a	9	36729344	36767679	-	8948	protein_coding	STT3, subunit of the oligosaccharyltransferase complex, homolog A (S. cerevisiae) [Source:MGI Symbol;Acc:MGI:105124]	-	-
ENSMUSG00000032479	4462	3849	4160	3385	3948	3075	4327	4591	4338	4163	4614	3864	3471	3314	3982	Map4	9	109931460	110083955	+	15143	protein_coding	microtubule-associated protein 4 [Source:MGI Symbol;Acc:MGI:97178]	-	-
ENSMUSG00000040385	4243	4655	3977	3619	3840	3128	4169	4428	4081	4367	3945	3740	2725	4025	4516	Ppp1ca	19	4192158	4195419	+	1379	protein_coding	protein phosphatase 1 catalytic subunit alpha [Source:MGI Symbol;Acc:MGI:103016]	-	-
ENSMUSG00000020088	3882	4041	4210	3267	4187	3373	4364	4702	4017	4679	3838	3333	3683	3418	4327	Sar1a	10	61680299	61693297	+	3740	protein_coding	secretion associated Ras related GTPase 1A [Source:MGI Symbol;Acc:MGI:98230]	-	-
ENSMUSG00000041417	2650	3407	4993	2071	6030	2830	4328	4099	4601	3737	3186	3758	6061	3139	4364	Pik3r1	13	101680563	101768217	-	10079	protein_coding	phosphoinositide-3-kinase regulatory subunit 1 [Source:MGI Symbol;Acc:MGI:97583]	-	-
ENSMUSG00000030795	2591	3430	3533	3262	5529	5268	3378	3809	3390	3694	2675	4620	3845	5342	4856	Fus	7	127967457	127985701	+	11695	protein_coding	fused in sarcoma [Source:MGI Symbol;Acc:MGI:1353633]	-	-
ENSMUSG00000020964	3952	3719	3611	3497	4153	2897	4618	5848	4395	5261	3919	3195	3108	3151	3860	Sel1l	12	91806043	91849157	-	8555	protein_coding	sel-1 suppressor of lin-12-like (C. elegans) [Source:MGI Symbol;Acc:MGI:1329016]	-	-
ENSMUSG00000035152	5003	4060	4035	3513	3694	2735	4190	4423	4292	4185	4956	3528	3163	3320	4053	Ap2b1	11	83299024	83405035	+	8755	protein_coding	adaptor-related protein complex 2, beta 1 subunit [Source:MGI Symbol;Acc:MGI:1919020]	-	-
ENSMUSG00000046324	4408	4399	3308	3486	2506	2935	5162	4432	6107	4296	4683	3102	1936	4352	3948	Ermp1	19	29608214	29648415	-	9338	protein_coding	endoplasmic reticulum metallopeptidase 1 [Source:MGI Symbol;Acc:MGI:106250]	-	-
ENSMUSG00000026879	2826	3117	4086	2451	3405	3629	6223	4669	3966	4179	8236	3304	3708	2137	2994	Gsn	2	35256380	35307892	+	3157	protein_coding	gelsolin [Source:MGI Symbol;Acc:MGI:95851]	-	-
ENSMUSG00000013593	3471	4170	3722	3598	3742	4117	4441	4574	4568	4614	3711	3516	2853	3648	4128	Ndufs2	1	171234853	171251388	-	2313	protein_coding	NADH:ubiquinone oxidoreductase core subunit S2 [Source:MGI Symbol;Acc:MGI:2385112]	-	-
ENSMUSG00000026872	4795	3834	4342	3408	3729	2399	4734	5380	4939	5214	3170	3069	2936	3046	3830	Zeb2	2	44983632	45117395	-	19942	protein_coding	zinc finger E-box binding homeobox 2 [Source:MGI Symbol;Acc:MGI:1344407]	C2H2	C2H2
ENSMUSG00000030102	4194	3240	3011	2747	2848	2779	6008	5719	5287	5486	4659	3280	2978	2824	3601	Itpr1	6	108213096	108551109	+	18319	protein_coding	inositol 1,4,5-trisphosphate receptor 1 [Source:MGI Symbol;Acc:MGI:96623]	-	-
ENSMUSG00000019139	3825	4687	3764	3996	3965	4344	3188	2946	2853	3260	3430	3644	4468	4836	5443	Isyna1	8	70594373	70597290	+	2436	protein_coding	myo-inositol 1-phosphate synthase A1 [Source:MGI Symbol;Acc:MGI:1919030]	-	-
ENSMUSG00000009079	2244	4140	3064	3643	5112	5150	3358	3517	3256	3782	2243	4599	4154	5567	4816	Ewsr1	11	5069689	5099266	-	5907	protein_coding	Ewing sarcoma breakpoint region 1 [Source:MGI Symbol;Acc:MGI:99960]	-	-
ENSMUSG00000022995	3319	3537	4519	4118	4886	2494	3341	3887	3888	3659	4970	4171	4459	3711	3628	Enah	1	181896384	182019990	-	21452	protein_coding	ENAH actin regulator [Source:MGI Symbol;Acc:MGI:108360]	-	-
ENSMUSG00000001416	3141	5285	4156	4732	4024	2938	3056	3206	3323	3132	3653	4256	3455	4556	5411	Cct3	3	88297116	88321767	+	6370	protein_coding	chaperonin containing Tcp1, subunit 3 (gamma) [Source:MGI Symbol;Acc:MGI:104708]	-	-
ENSMUSG00000022336	2784	3994	4478	4412	3400	2917	3433	3359	3326	3466	3769	4295	4596	4599	5423	Eif3e	15	43250058	43282719	-	6719	protein_coding	eukaryotic translation initiation factor 3, subunit E [Source:MGI Symbol;Acc:MGI:99257]	-	-
ENSMUSG00000038502	2859	4014	3713	3847	5059	4703	3495	3809	3622	3707	3203	4150	3853	4176	4038	Ptov1	7	44863067	44869788	-	4213	protein_coding	prostate tumor over expressed gene 1 [Source:MGI Symbol;Acc:MGI:1933946]	-	-
ENSMUSG00000032115	4770	3789	4479	3822	4288	2185	3330	4200	3226	3588	6373	3652	2929	2675	4749	Hyou1	9	44379490	44392369	+	7230	protein_coding	hypoxia up-regulated 1 [Source:MGI Symbol;Acc:MGI:108030]	-	-
ENSMUSG00000024853	3947	3956	3757	3408	4125	3293	3582	3921	3711	3905	4428	3819	3519	3929	4732	Sf3b2	19	5273923	5295455	-	3231	protein_coding	splicing factor 3b, subunit 2 [Source:MGI Symbol;Acc:MGI:2441856]	-	-
ENSMUSG00000041697	2358	3679	3410	3685	4842	7474	4403	4475	4209	4514	1762	3188	3243	3088	3650	Cox6a1	5	115345642	115348981	-	702	protein_coding	cytochrome c oxidase subunit 6A1 [Source:MGI Symbol;Acc:MGI:103099]	-	-
ENSMUSG00000022314	3345	4061	4003	4123	3964	2389	3479	3655	3544	3538	3723	4512	3944	4368	5239	Rad21	15	51962240	51991747	-	4232	protein_coding	RAD21 cohesin complex component [Source:MGI Symbol;Acc:MGI:108016]	-	-
ENSMUSG00000039852	4050	3465	3159	2837	3703	3370	5291	5242	4871	4625	3896	3655	3505	2708	3430	Rere	4	150281646	150621966	+	8528	protein_coding	arginine glutamic acid dipeptide (RE) repeats [Source:MGI Symbol;Acc:MGI:2683486]	C2C2-GATA	C2C2->C2C2-GATA
ENSMUSG00000048758	2531	5663	3717	4597	4211	4238	3006	3190	2898	3281	2327	4261	4431	4225	5187	Rpl29	9	106429454	106431568	+	1126	protein_coding	ribosomal protein L29 [Source:MGI Symbol;Acc:MGI:99687]	-	-
ENSMUSG00000026341	3073	4455	4472	4159	3861	2426	3884	3774	3800	3450	4180	3966	3932	3883	4424	Actr3	1	125392905	125435727	-	4631	protein_coding	ARP3 actin-related protein 3 [Source:MGI Symbol;Acc:MGI:1921367]	-	-
ENSMUSG00000030662	4383	4361	4170	4106	3216	2292	3639	3624	3560	3500	5241	3852	3615	3668	4504	Ipo5	14	120911224	120947999	+	6001	protein_coding	importin 5 [Source:MGI Symbol;Acc:MGI:1917822]	-	-
ENSMUSG00000090733	1367	3964	3671	5676	3781	3425	3834	3606	3949	4147	1843	5868	4793	1795	5973	Rps27	3	90212522	90213651	-	1043	protein_coding	ribosomal protein S27 [Source:MGI Symbol;Acc:MGI:1888676]	-	-
ENSMUSG00000040681	2664	4229	3944	4105	4071	2648	4172	4180	3978	4033	3677	4246	3254	3533	4933	Hmgn1	16	96120618	96127729	-	3221	protein_coding	high mobility group nucleosomal binding domain 1 [Source:MGI Symbol;Acc:MGI:96120]	-	-
ENSMUSG00000058230	4421	3441	4171	2954	4338	2470	4056	5581	4251	4934	5049	3022	2315	2559	3942	Arhgap35	7	16493719	16614993	-	9147	protein_coding	Rho GTPase activating protein 35 [Source:MGI Symbol;Acc:MGI:1929494]	-	-
ENSMUSG00000041459	2351	4621	3615	4414	4212	3307	3267	3521	3249	3304	3145	4679	4153	5117	4445	Tardbp	4	148612382	148627019	-	7796	protein_coding	TAR DNA binding protein [Source:MGI Symbol;Acc:MGI:2387629]	-	-
ENSMUSG00000020152	3651	3650	4838	3500	3103	2909	4564	4418	4791	4239	4899	3262	3527	2833	3155	Actr2	11	20062304	20112913	-	5204	protein_coding	ARP2 actin-related protein 2 [Source:MGI Symbol;Acc:MGI:1913963]	-	-
ENSMUSG00000003847	5791	3676	3433	2670	3222	3514	4582	4851	4775	4739	2885	3257	3238	3695	2986	Nfat5	8	107293470	107379517	+	18378	protein_coding	nuclear factor of activated T cells 5 [Source:MGI Symbol;Acc:MGI:1859333]	-	-
ENSMUSG00000031708	2985	3855	3362	3516	3922	6092	3875	4729	4166	4510	2327	3340	3266	3695	3628	Tecr	8	83571698	83607971	-	2191	protein_coding	trans-2,3-enoyl-CoA reductase [Source:MGI Symbol;Acc:MGI:1915408]	-	-
ENSMUSG00000021709	3885	3203	3935	3285	3767	2178	4270	4410	4274	4010	5081	3806	3653	3442	4004	Erbin	13	103818787	103920514	-	7939	protein_coding	Erbb2 interacting protein [Source:MGI Symbol;Acc:MGI:1890169]	-	-
ENSMUSG00000050397	2205	3957	4088	4537	5539	4045	3463	4386	3523	3475	3009	3496	3203	3874	4365	Foxl2	9	98955288	98958543	+	3256	protein_coding	forkhead box L2 [Source:MGI Symbol;Acc:MGI:1349428]	-	-
ENSMUSG00000057530	4361	3504	2875	3069	4732	2981	3859	4365	4014	3992	3349	3933	2808	3759	5529	Ece1	4	137862237	137965229	+	5300	protein_coding	endothelin converting enzyme 1 [Source:MGI Symbol;Acc:MGI:1101357]	-	-
ENSMUSG00000048126	3091	4684	3059	2501	3875	3318	5748	4813	4966	4307	3490	3242	4530	2305	3050	Col6a3	1	90765923	90843971	-	11963	protein_coding	collagen, type VI, alpha 3 [Source:MGI Symbol;Acc:MGI:88461]	-	-
ENSMUSG00000017485	3008	4057	3836	3637	3774	2716	3853	3975	4016	3847	3997	3978	3720	4059	4493	Top2b	14	16365179	16435462	+	14613	protein_coding	topoisomerase (DNA) II beta [Source:MGI Symbol;Acc:MGI:98791]	-	-
ENSMUSG00000066324	3841	3781	3936	3874	2928	1979	4535	4602	4362	4632	5174	3388	3021	3020	3818	Impad1	4	4762484	4793355	-	6543	protein_coding	inositol monophosphatase domain containing 1 [Source:MGI Symbol;Acc:MGI:1915720]	-	-
ENSMUSG00000001642	4240	3299	3412	2519	3776	5250	4717	5589	4603	5936	1884	2478	2974	2713	3484	Akr1b3	6	34302434	34317478	-	8384	protein_coding	aldo-keto reductase family 1, member B3 (aldose reductase) [Source:MGI Symbol;Acc:MGI:1353494]	-	-
ENSMUSG00000028757	3072	3725	3698	3239	4319	3655	3718	3821	3476	3566	3746	3719	4298	3842	4951	Ddost	4	138304730	138312628	+	2120	protein_coding	dolichyl-di-phosphooligosaccharide-protein glycotransferase [Source:MGI Symbol;Acc:MGI:1194508]	-	-
ENSMUSG00000031626	3723	4131	4257	4628	2834	2368	4730	3966	4292	3365	4879	5168	2833	3266	2396	Sorbs2	8	45507788	45827906	+	27851	protein_coding	sorbin and SH3 domain containing 2 [Source:MGI Symbol;Acc:MGI:1924574]	-	-
ENSMUSG00000034708	3019	4019	3621	2623	3772	3937	4474	3885	3973	3945	3313	3788	4234	3331	4871	Grn	11	102430315	102437048	+	3474	protein_coding	granulin [Source:MGI Symbol;Acc:MGI:95832]	-	-
ENSMUSG00000028416	4610	4068	4648	3806	3480	3831	3538	3509	3824	3598	4039	2978	3359	3740	3771	Bag1	4	40936398	40948294	-	1349	protein_coding	BCL2-associated athanogene 1 [Source:MGI Symbol;Acc:MGI:108047]	-	-
ENSMUSG00000037608	3170	3957	3810	4068	3807	2975	3532	3591	3282	3835	3568	4298	3964	4522	4376	Bclaf1	10	20312469	20344613	+	15301	protein_coding	BCL2-associated transcription factor 1 [Source:MGI Symbol;Acc:MGI:1917580]	-	-
ENSMUSG00000022708	7126	2931	3233	2284	2954	2996	4757	4904	4786	4797	4394	2970	3350	2758	2499	Zbtb20	16	42875881	43642602	+	30730	protein_coding	zinc finger and BTB domain containing 20 [Source:MGI Symbol;Acc:MGI:1929213]	TRAF	TRAF
ENSMUSG00000029622	4345	4068	3747	2951	3493	4397	4742	4926	4169	4604	3689	2453	2885	2804	3405	Arpc1b	5	145114215	145130705	+	5115	protein_coding	actin related protein 2/3 complex, subunit 1B [Source:MGI Symbol;Acc:MGI:1343142]	-	-
ENSMUSG00000001211	4202	3264	3135	2574	3639	3714	5421	5481	5148	5657	3385	3003	2090	2637	3214	Agpat3	10	78269178	78352489	-	7790	protein_coding	1-acylglycerol-3-phosphate O-acyltransferase 3 [Source:MGI Symbol;Acc:MGI:1336186]	-	-
ENSMUSG00000026878	3090	4448	3714	4014	3203	2603	4341	4363	4330	4303	3805	3779	3460	3154	3953	Rab14	2	35180205	35201120	-	13589	protein_coding	RAB14, member RAS oncogene family [Source:MGI Symbol;Acc:MGI:1915615]	-	-
ENSMUSG00000079641	2218	4229	3679	5406	3771	3829	2832	2911	2650	3047	2036	4795	5690	3973	5417	Rpl39	X	37082520	37085402	-	1434	protein_coding	ribosomal protein L39 [Source:MGI Symbol;Acc:MGI:1914498]	-	-
ENSMUSG00000038650	3133	4368	3694	3254	3306	3905	4574	4246	4769	4351	3176	2853	3582	3356	3915	Rnh1	7	141160326	141172857	-	2594	protein_coding	ribonuclease/angiogenin inhibitor 1 [Source:MGI Symbol;Acc:MGI:1195456]	-	-
ENSMUSG00000031078	2857	4392	3690	4057	3688	3175	4462	3978	4858	4048	3944	3671	2611	3752	3237	Cttn	7	144435733	144471009	-	4192	protein_coding	cortactin [Source:MGI Symbol;Acc:MGI:99695]	-	-
ENSMUSG00000024247	2168	2066	2711	2091	5438	5329	4392	8766	4408	7156	1073	2567	3188	1548	3490	Pkdcc	17	83215292	83225070	+	2712	protein_coding	protein kinase domain containing, cytoplasmic [Source:MGI Symbol;Acc:MGI:2147077]	-	-
ENSMUSG00000061665	3221	3691	4152	4020	3229	2785	4512	4377	4205	4325	3760	3586	3473	3396	3657	Cd2ap	17	42792951	42876665	-	15864	protein_coding	CD2-associated protein [Source:MGI Symbol;Acc:MGI:1330281]	-	-
ENSMUSG00000026483	2614	2366	2880	2295	2595	2906	7171	6787	8078	5531	4999	2335	1960	1871	1965	Fam129a	1	151571186	151721939	+	7380	protein_coding	family with sequence similarity 129, member A [Source:MGI Symbol;Acc:MGI:2137237]	-	-
ENSMUSG00000024758	3188	4045	3960	3495	3058	2817	4015	3968	4047	4009	4312	3690	4108	3450	4153	Rtn3	19	7425901	7483289	-	5030	protein_coding	reticulon 3 [Source:MGI Symbol;Acc:MGI:1339970]	-	-
ENSMUSG00000030934	2850	4047	3119	3061	2999	3976	4570	4731	4439	4482	3727	3290	3186	3510	4263	Oat	7	132557478	132576398	-	2360	protein_coding	ornithine aminotransferase [Source:MGI Symbol;Acc:MGI:97394]	-	-
ENSMUSG00000039100	3224	4262	3669	4220	3067	2171	4477	4313	4685	4017	4356	3975	3057	3463	3262	2023-03-06	15	31455891	31531053	-	9174	protein_coding	membrane-associated ring finger (C3HC4) 6 [Source:MGI Symbol;Acc:MGI:2442773]	-	-
ENSMUSG00000022912	4096	3197	3146	2117	3370	2899	5264	6185	4704	6445	2363	2859	3340	2539	3681	Pros1	16	62854307	62929346	+	4088	protein_coding	protein S (alpha) [Source:MGI Symbol;Acc:MGI:1095733]	-	-
ENSMUSG00000021484	3521	4186	3764	3774	3488	2753	4293	4037	4259	3974	4539	3223	3139	3011	4213	Lman2	13	55343833	55362783	-	7920	protein_coding	lectin, mannose-binding 2 [Source:MGI Symbol;Acc:MGI:1914140]	-	-
ENSMUSG00000024085	5380	5056	2641	2857	2208	2375	5733	5658	5108	5180	3081	2274	2279	2953	3379	Man2a1	17	64600736	64755110	+	7223	protein_coding	mannosidase 2, alpha 1 [Source:MGI Symbol;Acc:MGI:104669]	-	-
ENSMUSG00000034158	4210	3708	4234	3836	3310	2198	3937	4495	3910	4360	4646	3241	3703	3103	3111	Lrrc58	16	37868389	37888858	+	8604	protein_coding	leucine rich repeat containing 58 [Source:MGI Symbol;Acc:MGI:2443542]	-	-
ENSMUSG00000007458	3037	3750	3940	3465	3741	2919	4155	4221	4221	4049	4234	3157	3674	3418	3854	M6pr	6	122308720	122317680	+	4170	protein_coding	mannose-6-phosphate receptor, cation dependent [Source:MGI Symbol;Acc:MGI:96904]	-	-
ENSMUSG00000018583	2952	4213	3935	3973	3528	2591	3665	3915	3876	3757	4133	3752	3489	3629	4382	G3bp1	11	55469685	55504838	+	7064	protein_coding	GTPase activating protein (SH3 domain) binding protein 1 [Source:MGI Symbol;Acc:MGI:1351465]	-	-
ENSMUSG00000001472	3070	3637	3409	3140	3862	3794	4029	4134	4372	3809	3520	3659	3517	3874	3879	Tcf25	8	123373753	123403835	+	5390	protein_coding	transcription factor 25 (basic helix-loop-helix) [Source:MGI Symbol;Acc:MGI:1914105]	-	-
ENSMUSG00000050565	2980	3989	3952	3730	3759	2770	3781	4298	4171	4102	3254	3459	3558	3583	4244	Tor1aip2	1	156035403	156068861	+	9218	protein_coding	torsin A interacting protein 2 [Source:MGI Symbol;Acc:MGI:3582695]	-	-
ENSMUSG00000031441	2978	3835	3663	3620	2037	3511	6086	4256	5325	4546	5900	2500	2587	2745	2038	Atp11a	8	12757014	12868728	+	11150	protein_coding	ATPase, class VI, type 11A [Source:MGI Symbol;Acc:MGI:1354735]	-	-
ENSMUSG00000102869	3609	3592	3408	3224	3429	2495	4578	4718	4675	4522	5032	3608	2690	2740	3272	2900097C17Rik	2	156388065	156392979	-	4915	lincRNA	RIKEN cDNA 2900097C17 gene [Source:MGI Symbol;Acc:MGI:1914767]	-	-
ENSMUSG00000040725	4680	3447	3985	3477	3809	2694	3652	3806	3540	3490	4892	3564	3101	3338	4077	Hnrnpul1	7	25721165	25754757	-	8654	protein_coding	heterogeneous nuclear ribonucleoprotein U-like 1 [Source:MGI Symbol;Acc:MGI:2443517]	-	-
ENSMUSG00000020027	2630	2804	4858	4278	8296	1542	1965	2742	2179	1957	2765	3962	4462	4343	6767	Socs2	10	95385362	95417180	-	9531	protein_coding	suppressor of cytokine signaling 2 [Source:MGI Symbol;Acc:MGI:1201787]	-	-
ENSMUSG00000032796	6472	4021	3291	2912	3882	2966	2993	3589	3378	3339	2788	2778	2992	4688	5409	Lama1	17	67697259	67822647	+	9681	protein_coding	laminin, alpha 1 [Source:MGI Symbol;Acc:MGI:99892]	-	-
ENSMUSG00000018567	2602	4194	4049	3734	3586	3562	3791	3604	3639	3692	3563	3500	4161	3494	4260	Gabarap	11	69991143	69994951	+	1844	protein_coding	gamma-aminobutyric acid receptor associated protein [Source:MGI Symbol;Acc:MGI:1861742]	-	-
ENSMUSG00000036550	4066	3538	3125	2866	2806	1895	4452	4685	4510	4624	5518	3486	2696	2709	4452	Cnot1	8	95719451	95807464	-	17169	protein_coding	CCR4-NOT transcription complex, subunit 1 [Source:MGI Symbol;Acc:MGI:2442402]	-	-
ENSMUSG00000037373	3231	3710	3640	3297	3959	3482	4118	4090	3824	3829	3421	3601	3643	3316	4151	Ctbp1	5	33247723	33274994	-	4476	protein_coding	C-terminal binding protein 1 [Source:MGI Symbol;Acc:MGI:1201685]	-	-
ENSMUSG00000032423	3157	4204	3946	4150	3251	2481	3621	3858	3536	3728	3556	3724	3762	3946	4307	Syncrip	9	88447009	88482574	-	12297	protein_coding	synaptotagmin binding, cytoplasmic RNA interacting protein [Source:MGI Symbol;Acc:MGI:1891690]	-	-
ENSMUSG00000026643	3967	3850	4145	3365	3675	3078	3795	4026	4332	3910	3442	3158	3028	3776	3606	Nmt2	2	3284212	3328877	+	6556	protein_coding	N-myristoyltransferase 2 [Source:MGI Symbol;Acc:MGI:1202298]	-	-
ENSMUSG00000029571	4175	4184	3160	3003	2526	2534	5208	4563	5024	4850	4440	2672	3028	2704	3045	Tmem106b	6	13069759	13089269	+	6931	protein_coding	transmembrane protein 106B [Source:MGI Symbol;Acc:MGI:1919150]	-	-
ENSMUSG00000032777	4532	3786	3764	3144	3332	2912	3862	3915	4726	3763	4482	3162	2639	3583	3474	Gtf3c1	7	125640954	125707780	-	12018	protein_coding	general transcription factor III C 1 [Source:MGI Symbol;Acc:MGI:107887]	-	-
ENSMUSG00000028413	3470	3499	4227	3310	4058	3104	4337	3461	4655	3781	3756	2835	3916	2897	3682	B4galt1	4	40804602	40854005	-	4234	protein_coding	UDP-Gal:betaGlcNAc beta 1,4- galactosyltransferase, polypeptide 1 [Source:MGI Symbol;Acc:MGI:95705]	-	-
ENSMUSG00000021109	2823	4050	4615	4800	3946	1654	3139	3097	2972	2793	4594	3802	3807	3990	4882	Hif1a	12	73901375	73947530	+	5896	protein_coding	hypoxia inducible factor 1, alpha subunit [Source:MGI Symbol;Acc:MGI:106918]	-	-
ENSMUSG00000035569	4474	3400	3352	3024	3508	3260	4301	4498	4255	4473	4020	3238	2832	3152	3114	Ankrd11	8	122883822	123042277	-	16580	protein_coding	ankyrin repeat domain 11 [Source:MGI Symbol;Acc:MGI:1924337]	-	-
ENSMUSG00000025862	4299	3359	4031	3298	3050	2125	3951	4439	3973	4475	4014	3673	2949	3136	4099	Stag2	X	42149317	42277185	+	8273	protein_coding	stromal antigen 2 [Source:MGI Symbol;Acc:MGI:1098583]	-	-
ENSMUSG00000002222	4019	3664	3597	3599	3172	2414	4138	4313	4300	4272	3998	3355	3287	3017	3705	Rmnd5a	6	71388634	71440637	-	6783	protein_coding	required for meiotic nuclear division 5 homolog A [Source:MGI Symbol;Acc:MGI:1915727]	-	-
ENSMUSG00000024782	3345	4030	3649	3079	2957	3241	4326	4152	4591	4367	3654	2992	3284	3423	3750	Ak3	19	29020833	29047961	-	3120	protein_coding	adenylate kinase 3 [Source:MGI Symbol;Acc:MGI:1860835]	-	-
ENSMUSG00000019087	2921	4307	3829	3592	3403	3578	3651	4078	4148	4045	3173	3137	3454	3581	3911	Atp6ap1	X	74297097	74304721	+	3026	protein_coding	ATPase, H+ transporting, lysosomal accessory protein 1 [Source:MGI Symbol;Acc:MGI:109629]	-	-
ENSMUSG00000051669	1670	1249	1745	1031	2480	6380	6714	10309	7087	9459	1172	1531	1627	914	1426	AU021092	16	5211823	5222299	-	1368	protein_coding	expressed sequence AU021092 [Source:MGI Symbol;Acc:MGI:2146559]	-	-
ENSMUSG00000026335	3942	3925	4605	4116	3289	2463	4239	3457	3717	3712	4826	3572	2906	2826	3193	Pam	1	97795114	98095646	-	11892	protein_coding	peptidylglycine alpha-amidating monooxygenase [Source:MGI Symbol;Acc:MGI:97475]	-	-
ENSMUSG00000056076	3821	4070	4332	3409	3685	2964	3544	3555	3620	3433	5135	3266	2951	3224	3675	Eif3b	5	140419328	140443360	+	3346	protein_coding	eukaryotic translation initiation factor 3, subunit B [Source:MGI Symbol;Acc:MGI:106478]	-	-
ENSMUSG00000042699	2689	3976	3756	3826	3687	2241	3623	3779	3822	3632	4106	4067	3076	3617	4786	Dhx9	1	153455758	153487660	-	9603	protein_coding	DEAH (Asp-Glu-Ala-His) box polypeptide 9 [Source:MGI Symbol;Acc:MGI:108177]	-	-
ENSMUSG00000055436	1899	4116	3264	3811	3881	4322	3141	3290	3331	3563	2023	4295	4485	5265	3875	Srsf11	3	158010473	158036639	-	8446	protein_coding	serine/arginine-rich splicing factor 11 [Source:MGI Symbol;Acc:MGI:1916457]	-	-
ENSMUSG00000092274	1259	2368	1567	1732	4687	12881	4321	4080	5104	4373	485	2935	2627	4260	1876	Neat1	19	5824708	5845478	-	20771	lincRNA	nuclear paraspeckle assembly transcript 1 (non-protein coding) [Source:MGI Symbol;Acc:MGI:1914211]	-	-
ENSMUSG00000032803	4227	4206	3968	3971	3069	2372	3200	3423	3096	3235	4525	3592	3567	3876	4140	Cdv3	9	103353094	103365840	-	7403	protein_coding	carnitine deficiency-associated gene expressed in ventricle 3 [Source:MGI Symbol;Acc:MGI:2448759]	-	-
ENSMUSG00000020869	3062	5874	4466	5073	2976	2159	3018	2800	3093	2859	4850	3270	2751	4321	3788	Lrrc59	11	94629767	94645216	+	3073	protein_coding	leucine rich repeat containing 59 [Source:MGI Symbol;Acc:MGI:2138133]	-	-
ENSMUSG00000043962	3314	3341	3552	3147	3883	3014	3752	4146	3827	4004	4371	3860	2792	3263	4090	Thrap3	4	126164082	126202760	-	9234	protein_coding	thyroid hormone receptor associated protein 3 [Source:MGI Symbol;Acc:MGI:2442637]	-	-
ENSMUSG00000038855	2902	2030	3040	2257	3634	3472	5187	7358	4412	6727	2607	2669	2229	1783	3930	Itpkb	1	180330485	180424802	+	10463	protein_coding	inositol 1,4,5-trisphosphate 3-kinase B [Source:MGI Symbol;Acc:MGI:109235]	-	-
ENSMUSG00000032875	4873	3469	3392	2743	3791	2513	4071	4180	4209	3498	4824	3534	2429	3196	3378	Arhgef17	7	100869752	100932107	-	10795	protein_coding	Rho guanine nucleotide exchange factor (GEF) 17 [Source:MGI Symbol;Acc:MGI:2673002]	-	-
ENSMUSG00000031532	3479	3407	3122	2679	3202	3911	4801	4818	4614	4755	3470	2996	2647	2861	3313	Saraf	8	34154575	34170821	+	2929	protein_coding	store-operated calcium entry-associated regulatory factor [Source:MGI Symbol;Acc:MGI:1915137]	-	-
ENSMUSG00000043131	2760	3799	3409	3287	3307	2213	4377	4478	4214	4330	3318	3651	3557	2942	4246	Mob1a	6	83326016	83343776	+	4794	protein_coding	MOB kinase activator 1A [Source:MGI Symbol;Acc:MGI:2442631]	-	-
ENSMUSG00000041550	1675	2043	3583	1758	2532	3320	5097	9112	4862	10505	793	2662	1845	916	3167	Serpina5	12	104101113	104106137	+	2162	protein_coding	serine (or cysteine) peptidase inhibitor, clade A, member 5 [Source:MGI Symbol;Acc:MGI:107817]	-	-
ENSMUSG00000002831	2373	3424	6038	8257	2229	2939	2317	1850	3805	1905	7637	5274	766	4368	683	Plin4	17	56100591	56109803	-	5777	protein_coding	perilipin 4 [Source:MGI Symbol;Acc:MGI:1929709]	-	-
ENSMUSG00000041408	3161	3187	4351	3654	4747	2078	3580	4646	3561	3837	3539	3349	2701	2869	4556	Wapl	14	34673928	34747983	+	6623	protein_coding	WAPL cohesin release factor [Source:MGI Symbol;Acc:MGI:2675859]	-	-
ENSMUSG00000056579	4327	3929	4263	3461	3108	2729	3134	3630	3550	3938	3931	3207	3366	3570	3635	Tug1	11	3639785	3649673	-	9734	antisense	taurine upregulated gene 1 [Source:MGI Symbol;Acc:MGI:2144114]	-	-
ENSMUSG00000022841	3373	4602	3627	3124	3568	3563	3689	3578	3959	3684	2912	2903	3131	3657	4307	Ap2m1	16	20535478	20544909	+	4120	protein_coding	adaptor-related protein complex 2, mu 1 subunit [Source:MGI Symbol;Acc:MGI:1298405]	-	-
ENSMUSG00000021488	3834	3843	3362	3382	3318	2845	4063	3906	4050	4091	3977	3255	2566	3392	3783	Nsd1	13	55209782	55318325	+	17483	protein_coding	nuclear receptor-binding SET-domain protein 1 [Source:MGI Symbol;Acc:MGI:1276545]	SET	SET
ENSMUSG00000068039	3606	4462	4233	4137	3215	2266	3081	2953	3133	3153	3921	3667	3533	3791	4495	Tcp1	17	12915701	12925067	+	5030	protein_coding	t-complex protein 1 [Source:MGI Symbol;Acc:MGI:98535]	-	-
ENSMUSG00000052310	4526	3395	3811	2607	3168	3243	4361	4499	4232	4615	3541	2541	2731	2583	3746	Slc39a1	3	90248172	90253612	+	2364	protein_coding	solute carrier family 39 (zinc transporter), member 1 [Source:MGI Symbol;Acc:MGI:1353474]	-	-
ENSMUSG00000037503	2752	3048	2932	2922	3357	2681	4765	4908	4425	4708	4057	3660	3099	2730	3525	Fam168b	1	34813219	34843065	-	5219	protein_coding	family with sequence similarity 168, member B [Source:MGI Symbol;Acc:MGI:2448487]	-	-
ENSMUSG00000039831	3001	3187	3263	3789	3647	2108	3031	2611	2633	2845	4084	5034	4126	4627	5567	Arhgap29	3	121952541	122016753	+	8815	protein_coding	Rho GTPase activating protein 29 [Source:MGI Symbol;Acc:MGI:2443818]	-	-
ENSMUSG00000007564	2799	3600	3542	3454	3511	3203	3693	4077	3673	3655	3875	3579	3539	3338	3982	Ppp2r1a	17	20945311	20965916	+	3411	protein_coding	protein phosphatase 2, regulatory subunit A, alpha [Source:MGI Symbol;Acc:MGI:1926334]	-	-
ENSMUSG00000021242	2618	4243	4563	5286	3308	2535	3261	3360	3235	3283	4308	4368	2184	3519	3438	Npc2	12	84754562	84773152	-	5438	protein_coding	NPC intracellular cholesterol transporter 2 [Source:MGI Symbol;Acc:MGI:1915213]	-	-
ENSMUSG00000018474	4098	3190	3435	2731	4726	2654	4168	4029	4244	3368	5453	3285	2272	2658	3147	Chd3	11	69343273	69369406	-	8443	protein_coding	chromodomain helicase DNA binding protein 3 [Source:MGI Symbol;Acc:MGI:1344395]	PHD	PHD
ENSMUSG00000027593	3421	3518	3576	3304	4407	4125	3258	3561	3377	3777	2859	3195	3308	3563	4031	Raly	2	154791096	154867261	+	3292	protein_coding	hnRNP-associated with lethal yellow [Source:MGI Symbol;Acc:MGI:97850]	-	-
ENSMUSG00000005198	3930	3688	3305	3163	3448	2742	3581	4005	3754	3717	3532	3345	3399	3594	4073	Polr2a	11	69733997	69758637	-	7067	protein_coding	polymerase (RNA) II (DNA directed) polypeptide A [Source:MGI Symbol;Acc:MGI:98086]	-	-
ENSMUSG00000059447	2767	3165	3277	2742	3273	3243	4553	5292	4778	5590	2048	3055	2940	2568	3957	Hadhb	5	30155248	30184593	+	6595	protein_coding	hydroxyacyl-Coenzyme A dehydrogenase/3-ketoacyl-Coenzyme A thiolase/enoyl-Coenzyme A hydratase (trifunctional protein), beta subunit [Source:MGI Symbol;Acc:MGI:2136381]	-	-
ENSMUSG00000022817	4776	3502	2999	2219	3458	3258	4863	4554	4100	4519	3381	2656	2727	2409	3818	Itgb5	16	33829665	33949338	+	3553	protein_coding	integrin beta 5 [Source:MGI Symbol;Acc:MGI:96614]	-	-
ENSMUSG00000026131	4478	3119	3378	2447	3347	2161	4720	3919	3656	3614	5609	3182	3327	3072	3209	Dst	1	33908225	34308661	+	41155	protein_coding	dystonin [Source:MGI Symbol;Acc:MGI:104627]	-	-
ENSMUSG00000071659	3285	3516	3380	3000	3784	2997	3926	4098	3631	4005	3520	3423	2996	3661	3996	Hnrnpul2	19	8819401	8834142	+	5726	protein_coding	heterogeneous nuclear ribonucleoprotein U-like 2 [Source:MGI Symbol;Acc:MGI:1915943]	-	-
ENSMUSG00000029390	2513	3866	3421	3575	3454	2437	3747	3710	3378	3717	3745	3552	3635	3721	4716	Tmed2	5	124540695	124550506	+	2527	protein_coding	transmembrane p24 trafficking protein 2 [Source:MGI Symbol;Acc:MGI:1929269]	-	-
ENSMUSG00000021614	10578	5823	3129	3384	3205	549	579	1260	663	440	6128	4474	2108	6223	4587	Vcan	13	89655312	89742509	-	14462	protein_coding	versican [Source:MGI Symbol;Acc:MGI:102889]	-	-
ENSMUSG00000022403	3528	3857	3745	3529	3286	2474	3501	3487	3803	3464	3556	3546	3528	3450	4352	St13	15	81363669	81400077	-	10305	protein_coding	suppression of tumorigenicity 13 [Source:MGI Symbol;Acc:MGI:1917606]	-	-
ENSMUSG00000030084	3299	3790	3126	3729	2619	2490	4871	4735	4732	4346	5003	3029	1657	2728	2830	Plxna1	6	89316314	89362620	-	9054	protein_coding	plexin A1 [Source:MGI Symbol;Acc:MGI:107685]	-	-
ENSMUSG00000018481	2961	3340	2962	3329	3204	2594	3817	4708	3711	5237	2977	3318	3539	3199	4084	Appbp2	11	85187262	85235130	-	6463	protein_coding	amyloid beta precursor protein (cytoplasmic tail) binding protein 2 [Source:MGI Symbol;Acc:MGI:1914134]	-	-
ENSMUSG00000002981	3440	3776	3631	3089	3486	3602	3974	4262	4220	4151	3027	2827	2791	3048	3616	Clptm1	7	19631571	19665033	-	6210	protein_coding	cleft lip and palate associated transmembrane protein 1 [Source:MGI Symbol;Acc:MGI:1927155]	-	-
ENSMUSG00000030754	3008	3807	3541	3551	3364	2569	3681	3832	3782	3807	3485	3342	3321	3460	4390	Copb1	7	114215559	114254711	-	5582	protein_coding	coatomer protein complex, subunit beta 1 [Source:MGI Symbol;Acc:MGI:1917599]	-	-
ENSMUSG00000001833	2838	4477	4214	4171	3028	2241	3027	3169	3217	3333	3292	3746	4132	3664	4389	2023-09-07	9	25252439	25308571	+	11631	protein_coding	septin 7 [Source:MGI Symbol;Acc:MGI:1335094]	-	-
ENSMUSG00000020149	2716	4120	3698	3926	3079	2450	3726	3864	3778	3680	3152	3295	3555	3514	4378	Rab1a	11	20201432	20226856	+	3799	protein_coding	RAB1A, member RAS oncogene family [Source:MGI Symbol;Acc:MGI:97842]	-	-
ENSMUSG00000027984	2096	3539	3261	3308	3476	3482	4135	5207	4306	5254	2377	3272	2354	2991	3827	Hadh	3	131233419	131272101	-	4977	protein_coding	hydroxyacyl-Coenzyme A dehydrogenase [Source:MGI Symbol;Acc:MGI:96009]	-	-
ENSMUSG00000033047	3420	3242	4062	3330	3827	2358	3150	3111	3365	2943	4549	3782	3510	3434	4783	Eif3l	15	79075179	79094405	+	3639	protein_coding	eukaryotic translation initiation factor 3, subunit L [Source:MGI Symbol;Acc:MGI:2386251]	-	-
ENSMUSG00000028676	2484	3310	3269	3249	3780	3642	3283	3860	3087	4231	2633	3646	4074	4241	4024	Srsf10	4	135855747	135869908	+	7003	protein_coding	serine/arginine-rich splicing factor 10 [Source:MGI Symbol;Acc:MGI:1333805]	-	-
ENSMUSG00000024091	2564	4804	3530	3874	3256	3315	3562	3676	3908	3782	2443	3076	3301	3964	3670	Vapa	17	65578327	65613555	-	3492	protein_coding	vesicle-associated membrane protein, associated protein A [Source:MGI Symbol;Acc:MGI:1353561]	-	-
ENSMUSG00000030082	3265	3610	3892	2994	3684	2576	4123	4223	3877	4063	3779	3177	2892	2864	3670	Sec61a1	6	88503579	88518905	-	6732	protein_coding	Sec61 alpha 1 subunit (S. cerevisiae) [Source:MGI Symbol;Acc:MGI:1858417]	-	-
ENSMUSG00000000001	3017	3985	3640	3873	2789	1692	4118	4299	4024	3950	3771	3469	2974	2986	4066	Gnai3	3	108107280	108146146	-	3262	protein_coding	guanine nucleotide binding protein (G protein), alpha inhibiting 3 [Source:MGI Symbol;Acc:MGI:95773]	-	-
ENSMUSG00000033184	2781	3921	3728	3507	3321	2074	3927	4156	3844	3954	3594	3441	3293	3083	3989	Tmed7	18	46560235	46597535	-	8839	protein_coding	transmembrane p24 trafficking protein 7 [Source:MGI Symbol;Acc:MGI:1913926]	-	-
ENSMUSG00000040785	4260	3466	3746	3296	3258	2209	3084	3473	3383	3211	4378	3839	3415	3409	4142	Ttc3	16	94370618	94469343	+	16220	protein_coding	tetratricopeptide repeat domain 3 [Source:MGI Symbol;Acc:MGI:1276539]	-	-
ENSMUSG00000021796	3666	3728	3693	3351	2766	2085	4293	4037	3884	3654	3963	3187	3150	3239	3865	Bmpr1a	14	34410734	34503341	-	6351	protein_coding	bone morphogenetic protein receptor, type 1A [Source:MGI Symbol;Acc:MGI:1338938]	-	-
ENSMUSG00000029430	2373	4829	3812	4423	3429	2474	3109	3199	3042	3167	3200	3698	3206	4030	4409	Ran	5	129020069	129024323	+	2646	protein_coding	RAN, member RAS oncogene family [Source:MGI Symbol;Acc:MGI:1333112]	-	-
ENSMUSG00000030246	2228	2505	2624	2838	3806	3745	3217	3955	3048	4122	2711	4171	4621	3665	5108	Ldhb	6	142490249	142507957	-	1570	protein_coding	lactate dehydrogenase B [Source:MGI Symbol;Acc:MGI:96763]	-	-
ENSMUSG00000036241	4803	3145	4161	3241	3367	3212	3069	3472	3213	3171	3661	2880	3781	3152	4009	Ube2r2	4	41135743	41193380	+	4189	protein_coding	ubiquitin-conjugating enzyme E2R 2 [Source:MGI Symbol;Acc:MGI:1914865]	-	-
ENSMUSG00000028161	6500	2897	4425	3365	2570	2847	3242	3578	3409	3430	4531	2722	3236	2825	2714	Ppp3ca	3	136670124	136937727	+	9981	protein_coding	protein phosphatase 3, catalytic subunit, alpha isoform [Source:MGI Symbol;Acc:MGI:107164]	-	-
ENSMUSG00000004558	5531	3401	3008	2368	3035	3618	3669	4452	3566	4266	2453	2819	3070	3147	3884	Ndrg2	14	51905271	51914158	-	3397	protein_coding	N-myc downstream regulated gene 2 [Source:MGI Symbol;Acc:MGI:1352498]	-	-
ENSMUSG00000024949	2551	3379	3144	3232	4047	3979	3385	3748	3697	3684	3085	3465	3708	3483	3688	Sf1	19	6363690	6378030	+	6211	protein_coding	splicing factor 1 [Source:MGI Symbol;Acc:MGI:1095403]	-	-
ENSMUSG00000026083	7183	3460	4147	3365	2825	2808	2568	2663	2615	2889	4337	2887	3567	3810	3121	Eif5b	1	37998010	38055579	+	9753	protein_coding	eukaryotic translation initiation factor 5B [Source:MGI Symbol;Acc:MGI:2441772]	-	-
ENSMUSG00000027479	3487	3876	3808	3474	3371	2167	3487	3754	3331	3608	3913	3533	3212	3114	4095	Mapre1	2	153741274	153773310	+	7811	protein_coding	microtubule-associated protein, RP/EB family, member 1 [Source:MGI Symbol;Acc:MGI:891995]	-	-
ENSMUSG00000031633	2670	3573	3348	3151	4376	4271	3420	3598	3406	3491	2969	3584	2881	3731	3736	Slc25a4	8	46206797	46211284	-	2353	protein_coding	solute carrier family 25 (mitochondrial carrier, adenine nucleotide translocator), member 4 [Source:MGI Symbol;Acc:MGI:1353495]	-	-
ENSMUSG00000063065	2628	3679	3388	3329	3359	4116	3863	3790	4011	3902	2902	3163	3102	3442	3502	Mapk3	7	126759601	126765819	+	2257	protein_coding	mitogen-activated protein kinase 3 [Source:MGI Symbol;Acc:MGI:1346859]	-	-
ENSMUSG00000052911	4310	3443	3146	2579	3504	3579	3805	3759	3962	3501	5248	2838	2221	3109	3151	Lamb2	9	108479736	108490530	+	6082	protein_coding	laminin, beta 2 [Source:MGI Symbol;Acc:MGI:99916]	-	-
ENSMUSG00000053510	4248	3297	3406	3153	3309	3054	3399	3719	3656	3637	3762	3294	2869	3552	3719	Nrd1	4	109000655	109061777	+	7140	protein_coding	nardilysin, N-arginine dibasic convertase, NRD convertase 1 [Source:MGI Symbol;Acc:MGI:1201386]	-	-
ENSMUSG00000030655	3797	3551	2895	2961	3144	2984	4014	3764	4015	4117	3256	3452	3216	3725	3176	Smg1	7	118131308	118243670	-	23984	protein_coding	SMG1 homolog, phosphatidylinositol 3-kinase-related kinase (C. elegans) [Source:MGI Symbol;Acc:MGI:1919742]	-	-
ENSMUSG00000022816	4334	4423	4423	2773	3890	2289	3490	2758	3336	2558	3882	2688	4181	2728	4138	Fstl1	16	37776873	37836514	+	4914	protein_coding	follistatin-like 1 [Source:MGI Symbol;Acc:MGI:102793]	-	-
ENSMUSG00000003226	3641	3409	3494	3181	2870	2084	4183	4232	3801	4066	4712	3053	2917	2777	3438	Ranbp2	10	58446920	58494356	+	11728	protein_coding	RAN binding protein 2 [Source:MGI Symbol;Acc:MGI:894323]	-	-
ENSMUSG00000019428	2975	3615	3204	2534	3831	4736	4009	3863	3961	3844	3195	2804	2766	3266	3208	Fkbp8	8	70527724	70535328	+	4529	protein_coding	FK506 binding protein 8 [Source:MGI Symbol;Acc:MGI:1341070]	-	-
ENSMUSG00000026554	3092	3173	3300	2760	3432	3007	3814	3876	3832	3914	3571	3558	3599	3214	3665	Dcaf8	1	172148084	172197005	+	12996	protein_coding	DDB1 and CUL4 associated factor 8 [Source:MGI Symbol;Acc:MGI:91860]	-	-
ENSMUSG00000038612	2777	3474	3291	3401	3181	2580	4068	3742	4038	4073	3404	3443	3607	2947	3573	Mcl1	3	95658788	95663176	+	3418	protein_coding	myeloid cell leukemia sequence 1 [Source:MGI Symbol;Acc:MGI:101769]	-	-
ENSMUSG00000008730	3367	4688	3295	3177	2521	2216	4019	3573	3607	3555	4675	2832	2900	4012	3137	Hipk1	3	103739815	103791563	-	10914	protein_coding	homeodomain interacting protein kinase 1 [Source:MGI Symbol;Acc:MGI:1314873]	-	-
ENSMUSG00000089715	5841	3226	3366	2236	2555	3511	3805	3833	3674	3745	5791	2449	2693	2377	2470	Cbx6	15	79823896	79834688	-	10609	protein_coding	chromobox 6 [Source:MGI Symbol;Acc:MGI:3512628]	-	-
ENSMUSG00000044783	3007	3281	2817	2664	3870	3015	2548	2147	2476	2320	4178	4705	4201	5570	4741	Hjurp	1	88262471	88277633	-	8331	protein_coding	Holliday junction recognition protein [Source:MGI Symbol;Acc:MGI:2685821]	-	-
ENSMUSG00000013787	3976	2840	3192	2821	3805	3563	3811	3942	4188	3782	3721	2864	3009	2695	3290	Ehmt2	17	34898469	34914052	+	5489	protein_coding	euchromatic histone lysine N-methyltransferase 2 [Source:MGI Symbol;Acc:MGI:2148922]	SET	SET
ENSMUSG00000025579	3169	3285	3838	3373	3744	3157	3359	3536	3730	3335	4065	3280	3012	2962	3641	Gaa	11	119267887	119285454	+	4783	protein_coding	glucosidase, alpha, acid [Source:MGI Symbol;Acc:MGI:95609]	-	-
ENSMUSG00000027189	3111	3566	3347	2971	3181	2038	4105	4272	3805	4037	4011	3427	3022	2826	3735	Trim44	2	102300119	102407828	-	5645	protein_coding	tripartite motif-containing 44 [Source:MGI Symbol;Acc:MGI:1931835]	-	-
ENSMUSG00000001467	2324	3207	2423	3373	1702	4476	5717	6662	4573	7148	1729	1960	1781	2672	1707	Cyp51	5	4081145	4104746	-	4415	protein_coding	cytochrome P450, family 51 [Source:MGI Symbol;Acc:MGI:106040]	-	-
ENSMUSG00000029068	1313	3559	2719	3012	3796	5739	3294	2838	3492	3544	1397	3777	4188	5127	3634	Ccnl2	4	155812489	155824543	+	5278	protein_coding	cyclin L2 [Source:MGI Symbol;Acc:MGI:1927119]	-	-
ENSMUSG00000022043	3268	3599	2806	2958	2834	2243	4631	4787	4737	4180	3509	3310	2481	2388	3593	Trim35	14	66297031	66311424	+	4618	protein_coding	tripartite motif-containing 35 [Source:MGI Symbol;Acc:MGI:1914104]	Others	Others
ENSMUSG00000000563	1880	4122	3402	3967	3327	2727	3543	3877	3479	3680	2787	3744	2814	3846	4086	Atp5f1	3	105942698	105960099	-	4105	protein_coding	ATP synthase, H+ transporting, mitochondrial F0 complex, subunit B1 [Source:MGI Symbol;Acc:MGI:1100495]	-	-
ENSMUSG00000047945	2439	3015	3926	4136	4551	3116	2216	2730	2570	2755	3638	4086	4349	3334	4199	Marcksl1	4	129513581	129515985	+	1605	protein_coding	MARCKS-like 1 [Source:MGI Symbol;Acc:MGI:97143]	-	-
ENSMUSG00000023845	3873	3538	3497	2911	2961	2043	4303	3926	4174	3916	4053	3182	2745	2789	3141	Lnpep	17	17521410	17625050	-	14144	protein_coding	leucyl/cystinyl aminopeptidase [Source:MGI Symbol;Acc:MGI:2387123]	-	-
ENSMUSG00000032855	4168	2917	2834	2156	3449	3011	5125	4710	4528	4474	3847	2569	2055	2314	2877	Pkd1	17	24549834	24596508	+	17415	protein_coding	polycystin 1, transient receptor poteintial channel interacting [Source:MGI Symbol;Acc:MGI:97603]	-	-
ENSMUSG00000032194	4682	3652	3653	2772	3301	2566	3749	3853	3766	3423	3569	2890	2783	2854	3478	Kank2	9	21766784	21798744	-	5235	protein_coding	KN motif and ankyrin repeat domains 2 [Source:MGI Symbol;Acc:MGI:2384568]	-	-
ENSMUSG00000035325	3294	3622	3199	2900	3815	2751	3232	3539	3407	3431	3269	3441	3442	3310	4281	Sec31a	5	100361649	100416234	-	7884	protein_coding	Sec31 homolog A (S. cerevisiae) [Source:MGI Symbol;Acc:MGI:1916412]	-	-
ENSMUSG00000022440	4060	3610	3650	2414	3526	3942	3789	4035	4407	4418	1757	2026	2613	3338	3334	C1qtnf6	15	78523346	78531416	-	2702	protein_coding	C1q and tumor necrosis factor related protein 6 [Source:MGI Symbol;Acc:MGI:1919959]	-	-
ENSMUSG00000000184	4085	2794	2885	3020	3159	1782	3383	4194	3537	3671	4871	3138	2345	3055	4990	Ccnd2	6	127125162	127152193	-	9409	protein_coding	cyclin D2 [Source:MGI Symbol;Acc:MGI:88314]	-	-
ENSMUSG00000030770	4117	3767	3671	2957	2764	2376	3941	3420	3539	3507	4622	2648	2944	3015	3573	Parva	7	112427505	112591692	+	10157	protein_coding	parvin, alpha [Source:MGI Symbol;Acc:MGI:1931144]	-	-
ENSMUSG00000027238	3218	3667	2725	2262	3588	3816	4915	3833	6146	4814	1539	1541	2823	2959	2993	Frmd5	2	121545529	121807087	-	7546	protein_coding	FERM domain containing 5 [Source:MGI Symbol;Acc:MGI:2442557]	-	-
ENSMUSG00000033004	3684	3348	2873	2875	2819	3016	3945	4233	4205	4131	3920	2964	2602	3124	3100	Mycbp2	14	103113411	103346814	-	19248	protein_coding	MYC binding protein 2, E3 ubiquitin protein ligase [Source:MGI Symbol;Acc:MGI:2179432]	-	-
ENSMUSG00000017421	2424	3890	3431	3368	3793	2975	3141	3170	3119	3272	2598	3585	3576	4408	4057	Zfp207	11	80383279	80405733	+	6658	protein_coding	zinc finger protein 207 [Source:MGI Symbol;Acc:MGI:1340045]	-	-
ENSMUSG00000056692	3881	3414	3141	2542	2865	3131	4628	4408	4410	4565	3431	2483	2314	2517	3073	D17Wsu92e	17	27751235	27820648	-	5287	protein_coding	DNA segment, Chr 17, Wayne State University 92, expressed [Source:MGI Symbol;Acc:MGI:106281]	-	-
ENSMUSG00000030516	3735	3117	3334	3088	2886	2030	3894	3578	3758	3483	4702	3555	3027	2918	3666	Tjp1	7	65296165	65527781	-	7811	protein_coding	tight junction protein 1 [Source:MGI Symbol;Acc:MGI:98759]	-	-
ENSMUSG00000006304	2619	3790	3536	3317	3176	2668	3401	3435	3601	3413	3117	3231	3391	3763	4140	Arpc2	1	74236084	74268209	+	2033	protein_coding	actin related protein 2/3 complex, subunit 2 [Source:MGI Symbol;Acc:MGI:1923959]	-	-
ENSMUSG00000021822	5694	3493	3705	2254	2764	3456	4259	3518	4472	3782	2343	2279	2545	2940	3075	Plau	14	20836660	20843385	+	2367	protein_coding	plasminogen activator, urokinase [Source:MGI Symbol;Acc:MGI:97611]	-	-
ENSMUSG00000033732	3035	3802	3395	3239	3511	2473	3543	3439	3493	3272	3541	3546	3307	3148	3809	Sf3b3	8	110810239	110846787	-	10919	protein_coding	splicing factor 3b, subunit 3 [Source:MGI Symbol;Acc:MGI:1289341]	-	-
ENSMUSG00000006728	2447	3598	3254	3495	4239	3207	2840	3006	3050	2928	2474	3981	3328	4113	4572	Cdk4	10	127063534	127067920	+	3249	protein_coding	cyclin-dependent kinase 4 [Source:MGI Symbol;Acc:MGI:88357]	-	-
ENSMUSG00000002808	1571	3029	3691	4279	3875	2600	4261	4542	5685	4212	3027	3268	2180	2396	1869	Epdr1	13	19591706	19619927	-	2745	protein_coding	ependymin related protein 1 (zebrafish) [Source:MGI Symbol;Acc:MGI:2145369]	-	-
ENSMUSG00000047045	2577	2213	2289	1689	2946	2903	5842	7553	4696	7205	1762	2233	2134	1448	2893	Tmem164	X	142681406	142843494	+	6851	protein_coding	transmembrane protein 164 [Source:MGI Symbol;Acc:MGI:2148020]	-	-
ENSMUSG00000030189	3939	4060	3708	3254	3312	3134	2895	2562	2902	2842	3397	3222	3782	3675	3635	Ybx3	6	131364855	131388476	-	3075	protein_coding	Y box protein 3 [Source:MGI Symbol;Acc:MGI:2137670]	CSD	CSD
ENSMUSG00000018340	3789	3689	3890	2963	3093	2697	3099	2863	2797	2868	5593	2934	3459	3203	3342	Anxa6	11	54979108	55033445	-	2930	protein_coding	annexin A6 [Source:MGI Symbol;Acc:MGI:88255]	-	-
ENSMUSG00000030218	2139	4570	2916	2614	3850	4298	3441	2664	3021	2970	2040	3017	3744	4404	4569	Mgp	6	136872435	136875823	-	1187	protein_coding	matrix Gla protein [Source:MGI Symbol;Acc:MGI:96976]	-	-
ENSMUSG00000032187	3663	3791	3548	3667	3202	2509	3010	3216	3320	3224	4835	3495	2335	3042	3399	Smarca4	9	21616169	21704230	+	6475	protein_coding	SWI/SNF related, matrix associated, actin dependent regulator of chromatin, subfamily a, member 4 [Source:MGI Symbol;Acc:MGI:88192]	SNF2	SNF2
ENSMUSG00000057236	2662	3323	3566	3257	3396	2587	3274	3630	3279	3280	3406	3618	3325	3294	4325	Rbbp4	4	129307100	129335370	-	8744	protein_coding	retinoblastoma binding protein 4, chromatin remodeling factor [Source:MGI Symbol;Acc:MGI:1194912]	-	-
ENSMUSG00000074364	5889	4021	3515	2903	2751	2361	3654	3115	3367	3430	3420	2523	2536	3089	3637	Ehd2	7	15946958	15967567	-	5119	protein_coding	EH-domain containing 2 [Source:MGI Symbol;Acc:MGI:2154274]	-	-
ENSMUSG00000032047	1358	2401	2565	2302	3279	4317	4802	6158	4691	5962	1575	2844	2537	2156	3249	Acat1	9	53580522	53610382	-	3758	protein_coding	acetyl-Coenzyme A acetyltransferase 1 [Source:MGI Symbol;Acc:MGI:87870]	-	-
ENSMUSG00000062070	5064	4027	3163	2702	3412	1881	2789	2993	2656	2718	5419	2866	2585	3721	4128	Pgk1	X	106187100	106203699	+	2244	protein_coding	phosphoglycerate kinase 1 [Source:MGI Symbol;Acc:MGI:97555]	-	-
ENSMUSG00000032504	3073	3977	3388	2908	2728	2354	3901	4141	4100	3950	3433	3135	2858	2974	3183	Pdcd6ip	9	113651744	113708259	-	6903	protein_coding	programmed cell death 6 interacting protein [Source:MGI Symbol;Acc:MGI:1333753]	-	-
ENSMUSG00000062997	2250	3681	3472	3776	4007	4293	2782	2737	2603	2950	2148	3344	4000	3462	4505	Rpl35	2	39001580	39005624	-	1241	protein_coding	ribosomal protein L35 [Source:MGI Symbol;Acc:MGI:1913739]	-	-
ENSMUSG00000072941	1547	3091	2791	2379	2958	5890	4529	5369	4747	5812	1520	1836	2645	2092	2705	Sod3	5	52363791	52371418	+	3738	protein_coding	superoxide dismutase 3, extracellular [Source:MGI Symbol;Acc:MGI:103181]	-	-
ENSMUSG00000058600	1203	3340	2738	4344	4319	3835	2453	3427	3350	3150	2574	3875	4283	2294	4643	Rpl30	15	34440505	34443640	-	3020	protein_coding	ribosomal protein L30 [Source:MGI Symbol;Acc:MGI:98037]	-	-
ENSMUSG00000054387	2256	3164	3159	2692	3606	4351	2690	2960	2906	3350	2374	3900	4065	5113	3230	Mdm4	1	132959484	133030561	-	14798	protein_coding	transformed mouse 3T3 cell double minute 4 [Source:MGI Symbol;Acc:MGI:107934]	SWI/SNF-BAF60b	SWI/SNF-BAF60b
ENSMUSG00000037331	4170	3628	3218	2999	2910	2461	3688	3950	3634	3690	4413	2810	2693	2422	3104	Larp1	11	58009064	58062034	+	6829	protein_coding	La ribonucleoprotein domain family, member 1 [Source:MGI Symbol;Acc:MGI:1890165]	-	-
ENSMUSG00000031960	2999	3295	3472	2800	3419	4143	3573	4562	4018	4683	2471	2400	2504	2536	2900	Aars	8	111033144	111057664	+	9282	protein_coding	alanyl-tRNA synthetase [Source:MGI Symbol;Acc:MGI:2384560]	-	-
ENSMUSG00000020674	3655	3584	3226	3323	4018	2343	3067	3074	2984	3246	3317	3806	2782	3174	4055	Pxdn	12	29937608	30017658	+	9648	protein_coding	peroxidasin [Source:MGI Symbol;Acc:MGI:1916925]	-	-
ENSMUSG00000032458	3029	3381	3354	2968	3396	2448	3432	3731	3609	3616	3741	2987	2828	3241	3839	Copb2	9	98563721	98588382	+	6351	protein_coding	coatomer protein complex, subunit beta 2 (beta prime) [Source:MGI Symbol;Acc:MGI:1354962]	-	-
ENSMUSG00000038324	3387	3517	3494	3453	3012	2686	3400	3482	3588	3486	3723	3273	2858	2919	3263	Trpc4ap	2	155634271	155692384	-	8753	protein_coding	transient receptor potential cation channel, subfamily C, member 4 associated protein [Source:MGI Symbol;Acc:MGI:1930751]	-	-
ENSMUSG00000034707	3038	3414	3963	3673	2774	2110	3734	3323	3316	3147	5277	3346	2635	2918	2872	Gns	10	121365090	121397249	+	9442	protein_coding	glucosamine (N-acetyl)-6-sulfatase [Source:MGI Symbol;Acc:MGI:1922862]	-	-
ENSMUSG00000029447	2809	4335	3881	4219	3026	1969	2647	2759	2736	2843	3448	3538	3033	3702	4591	Cct6a	5	129786998	129846371	+	3620	processed_transcript	chaperonin containing Tcp1, subunit 6a (zeta) [Source:MGI Symbol;Acc:MGI:107943]	-	-
ENSMUSG00000058799	2881	3353	3227	3933	2962	1645	2473	2121	2295	2393	3780	4464	4638	3968	5386	Nap1l1	10	111473223	111498150	+	4994	protein_coding	nucleosome assembly protein 1-like 1 [Source:MGI Symbol;Acc:MGI:1855693]	-	-
ENSMUSG00000028790	2688	3321	3170	3519	3593	2465	2722	3096	2888	2977	2964	4170	3427	4072	4408	Khdrbs1	4	129703164	129742303	-	6419	protein_coding	KH domain containing, RNA binding, signal transduction associated 1 [Source:MGI Symbol;Acc:MGI:893579]	-	-
ENSMUSG00000025465	2127	3211	3273	3501	2883	3214	4041	4863	3976	4902	2285	2983	2566	2538	3116	Echs1	7	140105710	140116476	-	8286	protein_coding	enoyl Coenzyme A hydratase, short chain, 1, mitochondrial [Source:MGI Symbol;Acc:MGI:2136460]	-	-
ENSMUSG00000025503	2253	4035	2804	2932	3225	4273	4107	4138	4218	4205	2309	2452	2060	3178	3233	Taldo1	7	141392199	141402968	+	2171	protein_coding	transaldolase 1 [Source:MGI Symbol;Acc:MGI:1274789]	-	-
ENSMUSG00000015714	2486	3791	3064	2866	3172	3646	3732	3742	4075	4008	2381	2692	2880	3458	3417	Cers2	3	95314791	95323599	+	3676	protein_coding	ceramide synthase 2 [Source:MGI Symbol;Acc:MGI:1924143]	HB-other	HB->HB-other
ENSMUSG00000017776	2589	3495	3342	3291	3039	2116	3932	4084	3710	3754	3391	2930	3222	2796	3650	Crk	11	75679259	75706908	+	4730	protein_coding	v-crk avian sarcoma virus CT10 oncogene homolog [Source:MGI Symbol;Acc:MGI:88508]	-	-
ENSMUSG00000055204	3694	3458	3181	3409	2502	1682	3566	3776	3643	3369	4446	3329	2872	2971	3373	Ankrd17	5	90227166	90366577	-	35542	protein_coding	ankyrin repeat domain 17 [Source:MGI Symbol;Acc:MGI:1932101]	-	-
ENSMUSG00000030605	2538	2942	3490	2657	4866	2440	3307	2892	3764	2796	3788	3654	3598	2766	3747	Mfge8	7	79133768	79149060	-	4694	protein_coding	milk fat globule-EGF factor 8 protein [Source:MGI Symbol;Acc:MGI:102768]	-	-
ENSMUSG00000052337	2858	3500	3700	3294	3093	2701	3166	3938	3521	3882	2912	2879	2943	3159	3606	Immt	6	71831331	71877388	+	11353	protein_coding	inner membrane protein, mitochondrial [Source:MGI Symbol;Acc:MGI:1923864]	-	-
ENSMUSG00000021771	2174	3570	3419	3693	3372	3187	2814	3027	2991	3021	2930	3333	3779	3727	3973	Vdac2	14	21825238	21845879	+	4769	protein_coding	voltage-dependent anion channel 2 [Source:MGI Symbol;Acc:MGI:106915]	-	-
ENSMUSG00000024750	3109	3340	3542	3452	3458	2716	2936	3046	3079	2900	3196	3423	3791	3522	3470	Zfand5	19	21272278	21282289	+	6193	protein_coding	zinc finger, AN1-type domain 5 [Source:MGI Symbol;Acc:MGI:1278334]	-	-
ENSMUSG00000061731	4276	2827	4437	3138	6967	1429	2025	2514	2267	1532	3054	3716	2631	3491	4647	Ext1	15	53064038	53346159	-	8077	protein_coding	exostoses (multiple) 1 [Source:MGI Symbol;Acc:MGI:894663]	-	-
ENSMUSG00000006005	3853	3529	3370	3112	3070	1932	3218	3516	3442	3256	3967	3177	2783	2913	3800	Tpr	1	150392838	150449935	+	10496	protein_coding	translocated promoter region, nuclear basket protein [Source:MGI Symbol;Acc:MGI:1922066]	-	-
ENSMUSG00000025162	2687	3051	2842	2721	3470	2810	3813	4216	3890	3859	2956	3229	2990	2813	3565	Csnk1d	11	120961749	120991330	-	5022	protein_coding	casein kinase 1, delta [Source:MGI Symbol;Acc:MGI:1355272]	-	-
ENSMUSG00000030759	1924	3787	3636	3254	3874	2409	3086	2652	3808	2576	3375	2746	5325	3458	2966	Far1	7	113513834	113571511	+	8055	protein_coding	fatty acyl CoA reductase 1 [Source:MGI Symbol;Acc:MGI:1914670]	-	-
ENSMUSG00000048490	2829	2231	3425	2568	3495	2086	4364	4859	4144	4688	3632	2858	2482	1776	3427	Nrip1	16	76287400	76373827	-	11457	protein_coding	nuclear receptor interacting protein 1 [Source:MGI Symbol;Acc:MGI:1315213]	-	-
ENSMUSG00000025651	2503	3091	3265	2707	3597	4143	3207	3904	3373	3866	2536	2938	3000	2965	3545	Uqcrc1	9	108936633	108949623	+	4135	protein_coding	ubiquinol-cytochrome c reductase core protein 1 [Source:MGI Symbol;Acc:MGI:107876]	-	-
ENSMUSG00000054604	2634	3743	3497	3502	2786	1955	3468	3811	3561	3763	3329	3252	2823	2889	3618	Cggbp1	16	64851996	64859507	+	4522	protein_coding	CGG triplet repeat binding protein 1 [Source:MGI Symbol;Acc:MGI:2146370]	-	-
ENSMUSG00000022136	2441	3240	3006	3049	2707	1880	4168	4611	3636	4072	4316	2524	2939	2217	3809	Dnajc3	14	118937976	118981697	+	5141	protein_coding	DnaJ heat shock protein family (Hsp40) member C3 [Source:MGI Symbol;Acc:MGI:107373]	-	-
ENSMUSG00000028173	2652	3135	2807	1966	2809	3081	4328	3937	4432	4467	3154	2530	3012	2720	3556	Wls	3	159839672	159938664	+	8792	protein_coding	wntless WNT ligand secretion mediator [Source:MGI Symbol;Acc:MGI:1915401]	-	-
ENSMUSG00000029781	2702	3252	3296	2842	3372	2304	3608	3874	3466	3570	3488	3100	3011	2634	3929	Fkbp9	6	56832059	56879358	+	3314	protein_coding	FK506 binding protein 9 [Source:MGI Symbol;Acc:MGI:1350921]	-	-
ENSMUSG00000058297	3689	2566	2625	2011	2962	2884	4518	4937	4304	4586	2937	2455	2316	2325	3265	Spock2	10	60106219	60135198	+	5533	protein_coding	sparc/osteonectin, cwcv and kazal-like domains proteoglycan 2 [Source:MGI Symbol;Acc:MGI:1891351]	-	-
ENSMUSG00000032249	2591	3813	3558	3705	3254	2670	2656	2873	2795	2994	2615	3455	3249	3899	4204	Anp32a	9	62341293	62378812	+	3166	protein_coding	acidic (leucine-rich) nuclear phosphoprotein 32 family, member A [Source:MGI Symbol;Acc:MGI:108447]	-	-
ENSMUSG00000021703	3021	2303	2114	2043	2309	2406	5406	5114	4543	5062	3564	2649	2470	2048	3260	Serinc5	13	92611091	92711947	+	6679	protein_coding	serine incorporator 5 [Source:MGI Symbol;Acc:MGI:2444223]	-	-
ENSMUSG00000025935	2696	3626	3207	2997	2779	2994	3465	3793	3426	3801	2585	2622	3720	3025	3531	Tram1	1	13564698	13589910	-	3162	protein_coding	translocating chain-associating membrane protein 1 [Source:MGI Symbol;Acc:MGI:1919515]	-	-
ENSMUSG00000113948	2584	3425	3882	3908	3234	3369	2290	2270	2333	2273	2549	3241	4662	3664	4577	Rpl17-ps3	12	67510756	67511311	+	556	processed_pseudogene	ribosomal protein L17, pseudogene 3 [Source:MGI Symbol;Acc:MGI:3642206]	-	-
ENSMUSG00000020863	1915	3413	3027	3252	3719	3525	2738	2445	2469	2819	1904	4215	4136	4657	3954	Luc7l3	11	94287890	94321988	-	7278	protein_coding	LUC7-like 3 (S. cerevisiae) [Source:MGI Symbol;Acc:MGI:1914934]	-	-
ENSMUSG00000030894	2515	3635	3691	2932	3334	2676	3235	3330	3675	3570	2192	2881	3040	3381	3979	Tpp1	7	105744811	105752235	-	5164	protein_coding	tripeptidyl peptidase I [Source:MGI Symbol;Acc:MGI:1336194]	-	-
ENSMUSG00000007655	3873	3259	3512	2559	3116	2103	3551	3251	3258	3137	3581	2884	3758	2651	3517	Cav1	6	17306335	17341452	+	3444	protein_coding	caveolin 1, caveolae protein [Source:MGI Symbol;Acc:MGI:102709]	-	-
ENSMUSG00000026360	1880	2850	2012	3238	3892	2121	1898	1688	1462	1646	3156	5707	5654	4326	6451	Rgs2	1	143999338	144004161	-	3627	protein_coding	regulator of G-protein signaling 2 [Source:MGI Symbol;Acc:MGI:1098271]	-	-
ENSMUSG00000036752	2354	4164	3108	3290	2820	2590	2640	2395	2354	2548	4899	3380	3677	3863	3881	Tubb4b	2	25222160	25224702	-	2088	protein_coding	tubulin, beta 4B class IVB [Source:MGI Symbol;Acc:MGI:1915472]	-	-
ENSMUSG00000031386	3428	3475	3048	2757	2980	2161	3401	3666	3692	3505	4095	3180	2142	2837	3515	Hcfc1	X	73942792	73966357	-	8360	protein_coding	host cell factor C1 [Source:MGI Symbol;Acc:MGI:105942]	-	-
ENSMUSG00000031010	3822	3063	3068	2953	2052	1434	4120	4220	3856	4033	5391	2902	1927	2097	2896	Usp9x	X	13071498	13173328	+	15051	protein_coding	ubiquitin specific peptidase 9, X chromosome [Source:MGI Symbol;Acc:MGI:894681]	-	-
ENSMUSG00000033228	3070	3070	2851	3133	3054	1847	3159	3259	3037	3064	3850	3091	3301	3378	4664	Scaf11	15	96411699	96460843	-	10340	protein_coding	SR-related CTD-associated factor 11 [Source:MGI Symbol;Acc:MGI:1919443]	-	-
ENSMUSG00000030654	3021	3266	3580	3255	2942	2466	2908	2909	3028	3204	3293	3350	3185	3415	3929	Arl6ip1	7	118118891	118129662	-	2482	protein_coding	ADP-ribosylation factor-like 6 interacting protein 1 [Source:MGI Symbol;Acc:MGI:1858943]	-	-
ENSMUSG00000024360	3344	4083	3358	3640	2418	1794	3627	3725	3415	3361	3499	2820	2493	2537	3570	Etf1	18	34902785	34932007	-	3709	protein_coding	eukaryotic translation termination factor 1 [Source:MGI Symbol;Acc:MGI:2385071]	-	-
ENSMUSG00000028333	2056	3829	3118	3598	2965	2158	2452	2704	2752	2545	2873	4029	3417	4058	5061	Anp32b	4	46450902	46472657	+	1716	protein_coding	acidic (leucine-rich) nuclear phosphoprotein 32 family, member B [Source:MGI Symbol;Acc:MGI:1914878]	-	-
ENSMUSG00000052681	2629	3358	3280	3167	2855	1946	3551	3425	3440	3559	3286	2991	3507	2843	3775	Rap1b	10	117813871	117846035	-	2884	protein_coding	RAS related protein 1b [Source:MGI Symbol;Acc:MGI:894315]	-	-
ENSMUSG00000056999	3108	4015	3667	4096	2334	2336	2814	3033	3395	3116	3797	3144	2562	3106	3078	Ide	19	37268743	37337852	-	5823	protein_coding	insulin degrading enzyme [Source:MGI Symbol;Acc:MGI:96412]	-	-
ENSMUSG00000068267	3488	2746	3364	2415	3693	3490	4014	3822	3239	3382	3987	2471	2450	2278	2713	Cenpb	2	131175182	131180067	-	4886	protein_coding	centromere protein B [Source:MGI Symbol;Acc:MGI:88376]	-	-
ENSMUSG00000024140	3037	3046	3249	3162	4113	1996	3449	3587	3361	3265	3731	3289	3245	2109	2880	Epas1	17	86753907	86833410	+	5309	protein_coding	endothelial PAS domain protein 1 [Source:MGI Symbol;Acc:MGI:109169]	-	-
ENSMUSG00000018965	2437	3987	2776	2868	2574	3283	3774	3753	3634	3772	2168	2759	2977	3169	3520	Ywhah	5	33018816	33027966	+	3709	protein_coding	tyrosine 3-monooxygenase/tryptophan 5-monooxygenase activation protein, eta polypeptide [Source:MGI Symbol;Acc:MGI:109194]	-	-
ENSMUSG00000059248	3523	3463	3646	2983	2909	2209	3366	3318	3778	3351	4269	2827	2036	2688	3065	2023-09-09	11	117199661	117362325	+	7565	protein_coding	septin 9 [Source:MGI Symbol;Acc:MGI:1858222]	-	-
ENSMUSG00000027087	2467	3330	2711	3322	3368	1735	2892	2990	2949	2688	3235	3684	3668	3345	5041	Itgav	2	83724397	83806916	+	10744	protein_coding	integrin alpha V [Source:MGI Symbol;Acc:MGI:96608]	-	-
ENSMUSG00000024646	2239	3344	3220	5913	5076	2115	1588	1957	1570	1679	1509	4187	3099	4645	5279	Cyb5a	18	84851338	84880401	+	2143	protein_coding	cytochrome b5 type A (microsomal) [Source:MGI Symbol;Acc:MGI:1926952]	-	-
ENSMUSG00000043079	2747	2967	3354	3527	4577	1684	2595	2516	2385	2193	4197	3902	2891	3436	4419	Synpo	18	60593973	60660142	-	9533	protein_coding	synaptopodin [Source:MGI Symbol;Acc:MGI:1099446]	-	-
ENSMUSG00000030536	3947	3776	3622	3129	2849	1747	3148	2727	3175	3037	4648	2681	2888	2544	3422	Iqgap1	7	80711583	80825974	-	16538	protein_coding	IQ motif containing GTPase activating protein 1 [Source:MGI Symbol;Acc:MGI:1352757]	-	-
ENSMUSG00000024695	3199	3004	3415	2892	2979	2201	3513	4164	3498	3568	3311	2902	2741	2649	3304	Zfp91	19	12763660	12796126	-	10046	protein_coding	zinc finger protein 91 [Source:MGI Symbol;Acc:MGI:104854]	C2H2	C2H2
ENSMUSG00000042520	2784	3698	3271	2987	3188	2414	3098	3109	3121	3024	3179	3457	2881	3322	3730	Ubap2l	3	90000140	90052628	-	18659	protein_coding	ubiquitin-associated protein 2-like [Source:MGI Symbol;Acc:MGI:1921633]	-	-
ENSMUSG00000010608	2308	3218	3248	3144	3262	3334	2522	2767	2615	2994	2335	3565	3901	4703	3294	Rbm25	12	83631236	83683123	+	17376	protein_coding	RNA binding motif protein 25 [Source:MGI Symbol;Acc:MGI:1914289]	-	-
ENSMUSG00000047228	21	34	2939	4	7	0	760	9	4	0	37606	761	5053	0	6	A2ml1	6	128539821	128581608	-	7753	protein_coding	alpha-2-macroglobulin like 1 [Source:MGI Symbol;Acc:MGI:3039594]	-	-
ENSMUSG00000020290	2537	3936	3256	3538	3087	2423	2560	2878	2524	2903	2700	3378	3239	4093	4089	Xpo1	11	23256041	23298249	+	7181	protein_coding	exportin 1 [Source:MGI Symbol;Acc:MGI:2144013]	-	-
ENSMUSG00000025246	4277	3550	3427	2848	2536	1946	3163	3557	3283	3324	3835	2848	2542	2839	3131	Tbl1x	X	77511013	77662983	+	7052	protein_coding	transducin (beta)-like 1 X-linked [Source:MGI Symbol;Acc:MGI:1336172]	-	-
ENSMUSG00000022185	2388	3060	2493	2518	3974	4286	3037	3267	3300	3472	2272	3436	2363	3787	3442	Acin1	14	54642161	54686931	-	10527	protein_coding	apoptotic chromatin condensation inducer 1 [Source:MGI Symbol;Acc:MGI:1891824]	-	-
ENSMUSG00000030447	3342	3749	3006	3156	2711	1965	3599	3585	3595	3720	3390	2845	2323	2752	3356	Cyfip1	7	55841745	55932602	+	11941	protein_coding	cytoplasmic FMR1 interacting protein 1 [Source:MGI Symbol;Acc:MGI:1338801]	-	-
ENSMUSG00000040462	2515	2762	3087	2299	3385	3959	3622	3709	3890	3658	2995	2682	2585	2759	3158	Os9	10	127095650	127121131	-	2629	protein_coding	amplified in osteosarcoma [Source:MGI Symbol;Acc:MGI:1924301]	-	-
ENSMUSG00000006169	1903	2925	3006	2869	3317	1896	3821	4885	4078	4236	2578	2917	2579	2503	3541	Clint1	11	45852051	45910625	+	6946	protein_coding	clathrin interactor 1 [Source:MGI Symbol;Acc:MGI:2144243]	-	-
ENSMUSG00000038366	3589	3457	3281	2895	2773	2452	3762	3380	3376	3328	3216	2718	2379	3070	3347	Lasp1	11	97799000	97838764	+	6495	protein_coding	LIM and SH3 protein 1 [Source:MGI Symbol;Acc:MGI:109656]	Others	Others
ENSMUSG00000038127	2922	3229	3319	3131	3183	2070	3502	3672	3233	3358	3137	3347	2739	2933	3245	Ccdc50	16	27388869	27452218	+	8639	protein_coding	coiled-coil domain containing 50 [Source:MGI Symbol;Acc:MGI:1914751]	-	-
ENSMUSG00000076435	3050	2712	2354	1909	2002	4073	4521	4619	4559	4704	3037	1946	2475	2492	2555	Acsf2	11	94557102	94601871	-	3432	protein_coding	acyl-CoA synthetase family member 2 [Source:MGI Symbol;Acc:MGI:2388287]	-	-
ENSMUSG00000038976	3320	2895	2943	2574	3176	3266	4147	3635	3983	3671	3396	2547	2260	2497	2652	Ppp1r9b	11	94991035	95006899	+	5083	protein_coding	protein phosphatase 1, regulatory subunit 9B [Source:MGI Symbol;Acc:MGI:2387581]	-	-
ENSMUSG00000027206	3474	3498	3641	3666	2483	2030	2689	2718	2727	2878	3474	3071	3739	2994	3875	Cops2	2	125830304	125859139	-	3549	protein_coding	COP9 signalosome subunit 2 [Source:MGI Symbol;Acc:MGI:1330276]	-	-
ENSMUSG00000066232	3039	3560	3602	3499	2589	1504	3045	2952	3138	3027	4032	3353	3032	2907	3660	Ipo7	7	110018274	110056609	+	11169	protein_coding	importin 7 [Source:MGI Symbol;Acc:MGI:2152414]	-	-
ENSMUSG00000043019	3555	3604	3194	3412	2566	1724	3477	3547	3765	3319	3708	2877	2250	2683	3226	Edem3	1	151755371	151822051	+	6381	protein_coding	ER degradation enhancer, mannosidase alpha-like 3 [Source:MGI Symbol;Acc:MGI:1914217]	-	-
ENSMUSG00000005506	2309	3271	3063	3052	2917	1842	4063	4166	3845	4145	3346	2958	2303	2393	3223	Celf1	2	90940382	91019497	+	8446	protein_coding	CUGBP, Elav-like family member 1 [Source:MGI Symbol;Acc:MGI:1342295]	-	-
ENSMUSG00000028675	2166	3464	3361	3020	2809	3117	3201	3337	3417	3723	2233	2851	3153	3487	3466	Pnrc2	4	135870918	135873850	-	2213	protein_coding	proline-rich nuclear receptor coactivator 2 [Source:MGI Symbol;Acc:MGI:106512]	-	-
ENSMUSG00000036323	3527	3241	3468	3014	2748	2049	2896	3038	2892	3211	3573	2943	2956	3393	3838	Srp72	5	76974683	76999937	+	5717	protein_coding	signal recognition particle 72 [Source:MGI Symbol;Acc:MGI:1333795]	-	-
ENSMUSG00000061306	3258	3141	2952	2613	3587	2569	3702	3619	3722	3345	3315	2521	2101	2823	3481	Slc38a10	11	120103960	120151346	-	6421	protein_coding	solute carrier family 38, member 10 [Source:MGI Symbol;Acc:MGI:1919305]	-	-
ENSMUSG00000054693	2724	3288	3028	3152	3070	1732	3314	2860	3184	3145	3061	3373	3104	3301	4392	Adam10	9	70678997	70780229	+	4913	protein_coding	a disintegrin and metallopeptidase domain 10 [Source:MGI Symbol;Acc:MGI:109548]	-	-
ENSMUSG00000014355	2963	3258	2648	2933	2759	2125	3575	3431	3480	3547	4201	3105	2519	2597	3559	Anapc1	2	128610104	128687391	-	16714	protein_coding	anaphase promoting complex subunit 1 [Source:MGI Symbol;Acc:MGI:103097]	-	-
ENSMUSG00000013033	2266	2657	2659	2254	4055	4466	3973	5127	3518	4402	1946	2226	2042	2363	2740	Adgrl1	8	83900105	83941954	+	8587	protein_coding	adhesion G protein-coupled receptor L1 [Source:MGI Symbol;Acc:MGI:1929461]	-	-
ENSMUSG00000030341	2582	3251	2827	2414	2859	3504	4572	3954	4237	4133	1969	2353	2449	2524	3032	Tnfrsf1a	6	125349362	125362484	+	2591	protein_coding	tumor necrosis factor receptor superfamily, member 1a [Source:MGI Symbol;Acc:MGI:1314884]	-	-
ENSMUSG00000027332	1651	3208	2941	3145	2530	4286	3964	4675	3973	4754	1688	2787	2007	2616	2391	Ivd	2	118861954	118882909	+	5505	protein_coding	isovaleryl coenzyme A dehydrogenase [Source:MGI Symbol;Acc:MGI:1929242]	-	-
ENSMUSG00000034403	2220	2957	2320	2256	2747	3685	4338	4980	3666	5038	1879	2175	2462	2574	3301	Pja1	X	99465734	99471273	-	3324	protein_coding	praja ring finger ubiquitin ligase 1 [Source:MGI Symbol;Acc:MGI:1101765]	-	-
ENSMUSG00000053907	1604	3819	3045	3755	2676	2584	3524	3579	3243	3236	2745	3485	2552	3474	3232	Mat2a	6	72432799	72439558	-	4486	protein_coding	methionine adenosyltransferase II, alpha [Source:MGI Symbol;Acc:MGI:2443731]	-	-
ENSMUSG00000019432	2171	3326	2870	3451	3689	3186	2354	2622	2667	2723	2676	3728	3293	3950	3791	Ddx39b	17	35241746	35253707	+	3783	protein_coding	DEAD (Asp-Glu-Ala-Asp) box polypeptide 39B [Source:MGI Symbol;Acc:MGI:99240]	-	-
ENSMUSG00000004056	3009	2645	3100	2347	3139	2759	3784	4225	3586	4095	3737	2421	2466	2157	3001	Akt2	7	27591552	27640826	+	7131	protein_coding	thymoma viral proto-oncogene 2 [Source:MGI Symbol;Acc:MGI:104874]	-	-
ENSMUSG00000019326	2203	2079	2894	1910	3363	3663	3970	6644	3872	5788	1580	2140	2328	1315	2715	Aoc3	11	101330605	101341938	+	4621	protein_coding	amine oxidase, copper containing 3 [Source:MGI Symbol;Acc:MGI:1306797]	-	-
ENSMUSG00000063077	3157	3325	2846	2923	2350	2176	4226	3801	3961	3776	4294	2488	2404	2282	2349	Kif1b	4	149176319	149307693	-	17608	protein_coding	kinesin family member 1B [Source:MGI Symbol;Acc:MGI:108426]	-	-
ENSMUSG00000015120	2379	3451	3093	3584	2991	2620	2720	3027	2879	2969	2523	3495	3336	3597	3680	Ube2i	17	25261916	25274622	-	5474	protein_coding	ubiquitin-conjugating enzyme E2I [Source:MGI Symbol;Acc:MGI:107365]	-	-
ENSMUSG00000021171	2856	3141	3162	2514	2859	2328	3807	3651	3339	3491	3172	2612	3271	2820	3247	Esyt2	12	116281196	116391050	+	9143	protein_coding	extended synaptotagmin-like protein 2 [Source:MGI Symbol;Acc:MGI:1261845]	-	-
ENSMUSG00000034269	2819	3067	2879	2763	3262	2792	2995	3283	3158	3316	3143	3300	2957	3314	3185	Setd5	6	113077365	113153435	+	18347	protein_coding	SET domain containing 5 [Source:MGI Symbol;Acc:MGI:1920145]	SET	SET
ENSMUSG00000042079	2013	3627	2820	3197	3048	2356	3074	3234	3054	3076	2644	3491	2872	3849	3870	Hnrnpf	6	117900324	117925622	+	3047	protein_coding	heterogeneous nuclear ribonucleoprotein F [Source:MGI Symbol;Acc:MGI:2138741]	-	-
ENSMUSG00000022186	3119	3245	3308	2632	2372	2090	3407	3616	3197	3519	4013	2863	3193	2404	3179	Oxct1	15	4026383	4155344	+	3701	protein_coding	3-oxoacid CoA transferase 1 [Source:MGI Symbol;Acc:MGI:1914291]	-	-
ENSMUSG00000053898	2724	2997	2781	2492	3373	3808	3402	2921	3221	3524	2517	2810	2910	3182	3492	Ech1	7	28825217	28832247	+	2284	protein_coding	enoyl coenzyme A hydratase 1, peroxisomal [Source:MGI Symbol;Acc:MGI:1858208]	-	-
ENSMUSG00000060743	2359	2957	2888	2536	4148	2648	3121	3356	3248	3272	2776	3438	2587	3060	3742	H3f3a	1	180800832	180813943	-	3504	protein_coding	H3 histone, family 3A [Source:MGI Symbol;Acc:MGI:1097686]	-	-
ENSMUSG00000033436	2560	2732	2569	2369	3113	3033	3792	5379	3532	4148	2156	2452	2596	2321	3344	Armcx2	X	134804145	134809221	-	4532	protein_coding	armadillo repeat containing, X-linked 2 [Source:MGI Symbol;Acc:MGI:1914666]	-	-
ENSMUSG00000005533	3020	2580	2790	2760	3083	2319	3722	3460	3446	3217	4135	3295	2881	2633	2721	Igf1r	7	67952827	68233668	+	16791	protein_coding	insulin-like growth factor I receptor [Source:MGI Symbol;Acc:MGI:96433]	-	-
ENSMUSG00000026003	2112	2737	2365	2493	3032	3486	3529	3913	3908	4400	1851	3111	2702	2905	3506	Acadl	1	66830839	66863277	-	2005	protein_coding	acyl-Coenzyme A dehydrogenase, long-chain [Source:MGI Symbol;Acc:MGI:87866]	-	-
ENSMUSG00000001761	2992	2646	2929	2534	3045	2688	3671	3369	3432	3338	3506	2842	2952	2625	3476	Smo	6	29735503	29761365	+	5621	protein_coding	smoothened, frizzled class receptor [Source:MGI Symbol;Acc:MGI:108075]	-	-
ENSMUSG00000040463	2825	3599	3157	3330	3211	2532	2411	2626	2512	2475	3395	3314	3188	3578	3890	Mybbp1a	11	72441355	72451768	+	5803	protein_coding	MYB binding protein (P160) 1a [Source:MGI Symbol;Acc:MGI:106181]	-	-
ENSMUSG00000003458	2462	3156	2968	2745	3248	2861	3093	3370	3314	3474	2683	3035	2970	3016	3562	Ncstn	1	172066013	172082795	-	3975	protein_coding	nicastrin [Source:MGI Symbol;Acc:MGI:1891700]	-	-
ENSMUSG00000027193	2478	3326	3102	3095	2951	2383	2888	3234	3260	3405	2787	2857	3368	3160	3593	Api5	2	94411682	94438136	-	4545	protein_coding	apoptosis inhibitor 5 [Source:MGI Symbol;Acc:MGI:1888993]	-	-
ENSMUSG00000075706	2917	3480	3642	4100	3132	3070	2891	2680	2645	2856	2402	3074	2400	3162	3421	Gpx4	10	80047166	80056439	+	1724	protein_coding	glutathione peroxidase 4 [Source:MGI Symbol;Acc:MGI:104767]	-	-
ENSMUSG00000050812	3500	2986	3111	2651	2361	2132	3084	3157	3285	3193	4144	2847	3008	3053	3347	Ecpas	4	58798911	58912749	-	11447	protein_coding	Ecm29 proteasome adaptor and scaffold [Source:MGI Symbol;Acc:MGI:2140220]	-	-
ENSMUSG00000072235	3271	3719	4363	4383	3182	1550	1959	1385	2097	1625	4891	4110	4115	2969	2212	Tuba1a	15	98949837	98953703	-	1803	protein_coding	tubulin, alpha 1A [Source:MGI Symbol;Acc:MGI:98869]	-	-
ENSMUSG00000043411	2534	3339	2932	3181	2954	2836	2696	2882	2847	2891	2746	3625	2667	4060	3595	Usp48	4	137593755	137658537	+	9686	protein_coding	ubiquitin specific peptidase 48 [Source:MGI Symbol;Acc:MGI:2158502]	-	-
ENSMUSG00000038886	4042	3406	2966	2461	2420	2560	3732	3257	3797	3087	3869	2266	1988	3113	2820	Man2a2	7	80349097	80371375	-	10317	protein_coding	mannosidase 2, alpha 2 [Source:MGI Symbol;Acc:MGI:2150656]	-	-
ENSMUSG00000024501	3204	3050	3446	2739	3748	1674	2599	1968	2713	2061	4166	3728	4138	2940	3610	Dpysl3	18	43320979	43438286	-	6265	protein_coding	dihydropyrimidinase-like 3 [Source:MGI Symbol;Acc:MGI:1349762]	-	-
ENSMUSG00000015143	2656	3593	3593	2797	3580	2307	3232	2608	3320	2581	3994	2416	3623	2573	2895	Actn1	12	80167547	80260371	-	5533	protein_coding	actinin, alpha 1 [Source:MGI Symbol;Acc:MGI:2137706]	-	-
ENSMUSG00000000420	3084	3412	3296	2897	2461	2060	3359	3072	2908	3092	3977	2798	2985	2986	3381	Galnt1	18	24205344	24286818	+	5519	protein_coding	polypeptide N-acetylgalactosaminyltransferase 1 [Source:MGI Symbol;Acc:MGI:894693]	-	-
ENSMUSG00000017009	3356	2377	4712	3645	3134	2989	2998	2818	3000	3076	3489	2705	3023	2145	2291	Sdc4	2	164424247	164443887	-	2547	protein_coding	syndecan 4 [Source:MGI Symbol;Acc:MGI:1349164]	-	-
ENSMUSG00000031209	2835	1893	2950	2726	5095	1209	1943	3384	2124	2951	3155	4114	3573	2320	5477	Heph	X	96455359	96574485	+	7662	protein_coding	hephaestin [Source:MGI Symbol;Acc:MGI:1332240]	-	-
ENSMUSG00000032253	3673	3306	3295	3072	2669	1890	3001	2795	3079	3077	3453	3031	2846	3380	3175	Phip	9	82866159	82975516	-	33312	protein_coding	pleckstrin homology domain interacting protein [Source:MGI Symbol;Acc:MGI:1932404]	-	-
ENSMUSG00000070544	2738	3262	3185	3247	2777	1906	3017	3429	3336	3500	3304	2860	2411	3241	3514	Top1	2	160645888	160722764	+	10426	protein_coding	topoisomerase (DNA) I [Source:MGI Symbol;Acc:MGI:98788]	-	-
ENSMUSG00000057863	1741	2840	2524	2921	3814	4760	2867	3038	2803	2930	1713	3563	3230	3080	3796	Rpl36	17	56613416	56614243	+	383	protein_coding	ribosomal protein L36 [Source:MGI Symbol;Acc:MGI:1860603]	-	-
ENSMUSG00000022200	2356	3281	3159	3217	2652	2222	3064	3677	3162	3318	3127	2781	3457	2916	3230	Golph3	15	12321450	12351591	+	3257	protein_coding	golgi phosphoprotein 3 [Source:MGI Symbol;Acc:MGI:1913879]	-	-
ENSMUSG00000040945	2916	3414	3053	3212	3029	2225	3008	2963	3093	2700	3816	3132	2572	3300	3150	Rcc2	4	140700541	140723220	+	4155	protein_coding	regulator of chromosome condensation 2 [Source:MGI Symbol;Acc:MGI:1919784]	-	-
ENSMUSG00000016382	3144	3200	3419	2586	3111	1960	3132	2745	2862	2922	3451	2888	3695	2772	3653	Pls3	X	75785654	75875182	-	4238	protein_coding	plastin 3 (T-isoform) [Source:MGI Symbol;Acc:MGI:104807]	-	-
ENSMUSG00000001424	3338	3111	2970	2546	3379	2310	3176	3398	3250	3001	3496	2718	2658	2664	3494	Snd1	6	28475139	28935162	+	9757	protein_coding	staphylococcal nuclease and tudor domain containing 1 [Source:MGI Symbol;Acc:MGI:1929266]	-	-
ENSMUSG00000029169	1797	3595	2610	3232	2957	2022	3158	3286	3287	3346	2552	3642	2737	3138	4139	Dhx15	5	52150203	52190514	-	8496	protein_coding	DEAH (Asp-Glu-Ala-His) box polypeptide 15 [Source:MGI Symbol;Acc:MGI:1099786]	-	-
ENSMUSG00000005103	2767	3929	3140	3273	3171	2022	2906	2636	2941	2646	3270	3168	3114	3074	3380	Wdr1	5	38526813	38563221	-	8899	protein_coding	WD repeat domain 1 [Source:MGI Symbol;Acc:MGI:1337100]	-	-
ENSMUSG00000032412	2270	3127	3104	2918	2873	2629	3404	3306	3112	3391	2329	2828	3441	2905	3788	Atp1b3	9	96332655	96364442	-	2389	protein_coding	ATPase, Na+/K+ transporting, beta 3 polypeptide [Source:MGI Symbol;Acc:MGI:107788]	-	-
ENSMUSG00000037712	2376	3394	3068	3515	2967	1892	3056	3158	2879	2916	2748	3358	3477	2936	3673	Fermt2	14	45458795	45530118	-	5191	protein_coding	fermitin family member 2 [Source:MGI Symbol;Acc:MGI:2385001]	-	-
ENSMUSG00000035133	2773	2899	3078	3133	2327	1720	3673	3687	3296	3853	3512	2999	2638	2640	3181	Arhgap5	12	52503972	52571975	+	10887	protein_coding	Rho GTPase activating protein 5 [Source:MGI Symbol;Acc:MGI:1332637]	-	-
ENSMUSG00000004897	2607	3350	2872	2673	3137	2615	3001	3237	3141	2978	2970	3042	2564	3425	3780	Hdgf	3	87906321	87916132	+	2873	protein_coding	hepatoma-derived growth factor [Source:MGI Symbol;Acc:MGI:1194494]	-	-
ENSMUSG00000036545	3614	3482	3002	3620	3455	1811	2493	2194	2380	2131	2927	3548	3289	2934	4508	Adamts2	11	50602084	50807573	+	9336	protein_coding	a disintegrin-like and metallopeptidase (reprolysin type) with thrombospondin type 1 motif, 2 [Source:MGI Symbol;Acc:MGI:1347356]	-	-
ENSMUSG00000029247	2391	2978	2567	2718	2715	1986	3283	3088	3138	2952	3061	3463	3409	3349	4288	Paics	5	76951307	76967509	+	3139	protein_coding	phosphoribosylaminoimidazole carboxylase, phosphoribosylaminoribosylaminoimidazole, succinocarboxamide synthetase [Source:MGI Symbol;Acc:MGI:1914304]	-	-
ENSMUSG00000030678	2787	3131	2913	2819	3947	3178	2901	3045	2810	2762	2673	3037	2930	2923	3383	Maz	7	127022130	127027037	-	2976	protein_coding	MYC-associated zinc finger protein (purine-binding transcription factor) [Source:MGI Symbol;Acc:MGI:1338823]	C2H2	C2H2
ENSMUSG00000037062	3119	3194	3292	3073	2861	1904	3312	3409	3195	3365	3242	2840	2681	2410	3258	Sh3glb1	3	144683678	144720335	-	7467	protein_coding	SH3-domain GRB2-like B1 (endophilin) [Source:MGI Symbol;Acc:MGI:1859730]	-	-
ENSMUSG00000034120	1665	3640	2967	3251	3238	2664	2781	2809	2488	3019	2432	3288	3450	3525	3779	Srsf2	11	116849901	116853094	-	2958	protein_coding	serine/arginine-rich splicing factor 2 [Source:MGI Symbol;Acc:MGI:98284]	-	-
ENSMUSG00000025369	2966	2974	2571	2366	3578	3258	3336	3453	3373	3448	2424	2950	2550	2791	2894	Smarcc2	10	128459248	128490482	+	5552	protein_coding	SWI/SNF related, matrix associated, actin dependent regulator of chromatin, subfamily c, member 2 [Source:MGI Symbol;Acc:MGI:1915344]	-	-
ENSMUSG00000020580	3172	3500	3032	3012	2290	1917	3641	3125	3710	3012	3188	2773	2785	2975	2791	Rock2	12	16894895	16987823	+	13897	protein_coding	Rho-associated coiled-coil containing protein kinase 2 [Source:MGI Symbol;Acc:MGI:107926]	-	-
ENSMUSG00000011179	2709	4157	3020	3998	2511	1526	2474	2681	2018	2531	4005	3133	2370	3424	4326	Odc1	12	17544794	17551505	+	3405	protein_coding	ornithine decarboxylase, structural 1 [Source:MGI Symbol;Acc:MGI:97402]	-	-
ENSMUSG00000076258	7504	1885	3047	1450	5445	3894	4066	3007	1889	2057	3777	2255	1302	1749	1548	Gm23935	16	11144125	11144181	+	57	miRNA	predicted gene, 23935 [Source:MGI Symbol;Acc:MGI:5453712]	-	-
ENSMUSG00000025702	2629	2472	2584	1955	2831	2838	4182	4741	3910	4486	2744	2228	2546	1943	2751	2023-03-08	6	116338024	116409540	+	9634	protein_coding	membrane-associated ring finger (C3HC4) 8 [Source:MGI Symbol;Acc:MGI:1919029]	-	-
ENSMUSG00000027187	3381	2990	2804	2546	2301	3110	3454	3486	3543	3651	2769	2498	2320	2869	2996	Cat	2	103453849	103485160	-	2613	protein_coding	catalase [Source:MGI Symbol;Acc:MGI:88271]	-	-
ENSMUSG00000038965	2927	3230	3406	3118	2787	2693	2898	3122	3037	3208	2657	2648	2627	2896	3409	Ube2l3	16	17152013	17202649	-	5841	protein_coding	ubiquitin-conjugating enzyme E2L 3 [Source:MGI Symbol;Acc:MGI:109240]	-	-
ENSMUSG00000030551	5017	3090	2527	2106	2238	2518	3669	3800	3457	3607	2461	2485	2651	2365	2643	Nr2f2	7	70351944	70366735	-	8625	protein_coding	nuclear receptor subfamily 2, group F, member 2 [Source:MGI Symbol;Acc:MGI:1352452]	-	-
ENSMUSG00000038521	1396	2526	3670	3030	2100	2597	4300	3385	3816	3563	3176	2858	2910	2386	2904	C1s1	6	124530345	124542359	-	3129	protein_coding	complement component 1, s subcomponent 1 [Source:MGI Symbol;Acc:MGI:1355312]	-	-
ENSMUSG00000032228	2437	3188	3021	2962	2807	2120	3182	3203	3356	3087	3326	2920	2843	2745	3181	Tcf12	9	71842688	72111871	-	15529	protein_coding	transcription factor 12 [Source:MGI Symbol;Acc:MGI:101877]	bHLH	bHLH
ENSMUSG00000021745	2820	2456	2754	2520	2326	1867	3960	4267	3865	4211	3442	2517	2368	2104	2895	Ptprg	14	11553532	12242041	+	11009	protein_coding	protein tyrosine phosphatase, receptor type, G [Source:MGI Symbol;Acc:MGI:97814]	-	-
ENSMUSG00000017119	2775	2862	2790	2534	2870	2249	3494	3588	3474	3376	3157	2659	2506	2817	3202	Nbr1	11	101552149	101581951	+	6871	protein_coding	NBR1, autophagy cargo receptor [Source:MGI Symbol;Acc:MGI:108498]	-	-
ENSMUSG00000077450	2325	3004	2761	2857	3243	3097	3391	3136	3268	3270	2358	2763	3318	2430	3112	Rab11b	17	33742484	33760530	-	6109	protein_coding	RAB11B, member RAS oncogene family [Source:MGI Symbol;Acc:MGI:99425]	-	-
ENSMUSG00000058355	2462	3670	3249	3347	2735	2123	2643	2678	2809	2980	2932	2809	3188	3224	3432	Abce1	8	79683462	79711740	-	6004	protein_coding	ATP-binding cassette, sub-family E (OABP), member 1 [Source:MGI Symbol;Acc:MGI:1195458]	-	-
ENSMUSG00000020919	2109	3115	2917	3279	2605	2636	4055	3844	3708	3594	3168	2752	1970	2299	2227	Stat5b	11	100780731	100850724	-	5539	protein_coding	signal transducer and activator of transcription 5B [Source:MGI Symbol;Acc:MGI:103035]	-	-
ENSMUSG00000031715	2235	3157	3141	3321	2773	2009	2840	3128	3031	3058	2994	3020	2740	3075	3755	Smarca5	8	80698507	80739497	-	7777	protein_coding	SWI/SNF related, matrix associated, actin dependent regulator of chromatin, subfamily a, member 5 [Source:MGI Symbol;Acc:MGI:1935129]	SNF2	SNF2
ENSMUSG00000072501	2655	3284	3338	2766	3866	2159	2561	1957	3034	2380	2609	3722	3402	3718	2777	Phf20l1	15	66577560	66647976	+	17447	protein_coding	PHD finger protein 20-like 1 [Source:MGI Symbol;Acc:MGI:2444412]	-	-
ENSMUSG00000031740	1222	2495	2413	1645	2373	4147	4983	4251	4583	4242	2151	1909	2836	2076	2892	Mmp2	8	92827291	92853420	+	3371	protein_coding	matrix metallopeptidase 2 [Source:MGI Symbol;Acc:MGI:97009]	-	-
ENSMUSG00000037894	1723	2770	3763	2627	6057	1815	2309	2141	2510	1893	2104	2966	4240	3020	4241	H2afz	3	137864487	137866922	+	1776	protein_coding	H2A histone family, member Z [Source:MGI Symbol;Acc:MGI:1888388]	-	-
ENSMUSG00000055447	2891	2995	2483	2424	2342	2989	4139	4490	3750	4782	1954	2041	2284	2260	2268	Cd47	16	49800533	49915010	+	6276	protein_coding	CD47 antigen (Rh-related antigen, integrin-associated signal transducer) [Source:MGI Symbol;Acc:MGI:96617]	-	-
ENSMUSG00000009863	2193	2816	2698	2632	2957	4420	3090	3961	3403	3617	1601	1982	2946	2609	3094	Sdhb	4	140961203	140979193	+	2239	protein_coding	succinate dehydrogenase complex, subunit B, iron sulfur (Ip) [Source:MGI Symbol;Acc:MGI:1914930]	-	-
ENSMUSG00000022257	2171	3117	3099	3241	2165	2771	3902	3350	3682	4009	2739	2444	2576	2182	2546	Laptm4b	15	34238028	34284302	+	1938	protein_coding	lysosomal-associated protein transmembrane 4B [Source:MGI Symbol;Acc:MGI:1890494]	-	-
ENSMUSG00000036112	2554	3515	3420	3469	2692	1861	2737	2891	2825	2913	3178	3076	2501	2827	3527	Metap2	10	93858489	93897093	-	7654	protein_coding	methionine aminopeptidase 2 [Source:MGI Symbol;Acc:MGI:1929701]	-	-
ENSMUSG00000032580	2186	2765	2411	2517	3078	3495	2733	2655	3095	3011	2072	3336	3274	4005	3331	Rbm5	9	107740371	107770996	-	15434	protein_coding	RNA binding motif protein 5 [Source:MGI Symbol;Acc:MGI:1933204]	-	-
ENSMUSG00000028426	2578	3394	3109	3158	2644	1836	3125	3176	3208	3175	3144	2797	2496	2892	3210	Rad23b	4	55350043	55392237	+	5733	protein_coding	RAD23 homolog B, nucleotide excision repair protein [Source:MGI Symbol;Acc:MGI:105128]	-	-
ENSMUSG00000030224	2217	3416	3140	3382	2825	2196	2654	2984	2769	2882	2632	2969	3137	3183	3452	Strap	6	137735078	137751932	+	3090	protein_coding	serine/threonine kinase receptor associated protein [Source:MGI Symbol;Acc:MGI:1329037]	-	-
ENSMUSG00000026626	2956	3007	3002	2816	2322	2504	3501	3210	3727	3114	3299	2787	2307	2771	2512	Ppp2r5a	1	191351975	191403272	-	9607	protein_coding	protein phosphatase 2, regulatory subunit B', alpha [Source:MGI Symbol;Acc:MGI:2388479]	-	-
ENSMUSG00000019966	2861	2274	2723	2145	2469	2129	3600	4964	3521	4589	2419	2433	2197	2400	3105	Kitl	10	100015630	100100416	+	5911	protein_coding	kit ligand [Source:MGI Symbol;Acc:MGI:96974]	-	-
ENSMUSG00000025647	2093	3470	3471	3499	3763	2419	3072	2587	3303	2736	3101	2442	2867	2599	2384	Shisa5	9	109038565	109057777	+	3297	protein_coding	shisa family member 5 [Source:MGI Symbol;Acc:MGI:1915044]	-	-
ENSMUSG00000001910	3003	2699	3149	2601	3396	2398	3037	3685	3096	3312	3531	2358	2065	2363	3061	Nacc1	8	84670483	84687862	-	4300	protein_coding	nucleus accumbens associated 1, BEN and BTB (POZ) domain containing [Source:MGI Symbol;Acc:MGI:1914080]	TRAF	TRAF
ENSMUSG00000008892	2164	3114	2950	3103	3007	2519	2708	3152	2761	3262	2590	2834	2747	3069	3770	Vdac3	8	22577075	22593813	-	5420	protein_coding	voltage-dependent anion channel 3 [Source:MGI Symbol;Acc:MGI:106922]	-	-
ENSMUSG00000067851	3037	3031	3127	3160	2330	1549	3246	3113	3102	3150	4259	2899	2376	2432	2893	Arfgef1	1	10137571	10232670	-	11318	protein_coding	ADP-ribosylation factor guanine nucleotide-exchange factor 1(brefeldin A-inhibited) [Source:MGI Symbol;Acc:MGI:2442988]	-	-
ENSMUSG00000022365	2716	3079	2638	2533	2896	2741	3718	3641	3351	3570	2531	2379	2402	2586	2918	Derl1	15	57869502	57892448	-	3328	protein_coding	Der1-like domain family, member 1 [Source:MGI Symbol;Acc:MGI:1915069]	-	-
ENSMUSG00000028517	2672	4417	2777	2942	1826	1852	3719	2806	3234	2704	2840	2325	2359	3698	3510	Plpp3	4	105157347	105232764	+	3159	protein_coding	phospholipid phosphatase 3 [Source:MGI Symbol;Acc:MGI:1915166]	-	-
ENSMUSG00000055762	2760	3032	2983	2915	2660	3254	2470	2598	2427	2496	3198	3027	2830	3397	3623	Eef1d	15	75894205	75909556	-	6488	protein_coding	eukaryotic translation elongation factor 1 delta (guanine nucleotide exchange protein) [Source:MGI Symbol;Acc:MGI:1913906]	-	-
ENSMUSG00000062328	1713	3589	3786	2811	4244	2243	1904	1670	1651	3118	1786	3531	5070	3126	3291	Rpl17	18	75000477	75003381	+	775	protein_coding	ribosomal protein L17 [Source:MGI Symbol;Acc:MGI:2448270]	-	-
ENSMUSG00000027940	2780	2809	2627	2581	2104	1689	4394	3978	3779	3787	3967	2177	1811	1801	3195	Tpm3	3	90072649	90100902	+	6085	protein_coding	tropomyosin 3, gamma [Source:MGI Symbol;Acc:MGI:1890149]	-	-
ENSMUSG00000026701	1502	3394	3297	4690	2401	2108	2744	2984	2858	2727	3272	3495	2291	2943	2770	Prdx6	1	161240112	161251219	-	4804	protein_coding	peroxiredoxin 6 [Source:MGI Symbol;Acc:MGI:894320]	-	-
ENSMUSG00000032324	1862	2825	2714	2597	3211	2920	3017	3019	3078	3122	2264	3009	3318	2782	3731	Tspan3	9	56131725	56165477	-	4274	protein_coding	tetraspanin 3 [Source:MGI Symbol;Acc:MGI:1928098]	-	-
ENSMUSG00000045039	3700	2628	2688	2048	3006	2578	3476	3625	3256	3340	4220	2270	1757	2335	2538	Megf8	7	25317164	25365917	+	10159	protein_coding	multiple EGF-like-domains 8 [Source:MGI Symbol;Acc:MGI:2446294]	-	-
ENSMUSG00000019873	2645	2546	2871	2669	3048	1852	3597	3789	3487	3451	2601	2629	2884	2230	3123	Reep3	10	67009189	67096945	-	8294	protein_coding	receptor accessory protein 3 [Source:MGI Symbol;Acc:MGI:88930]	-	-
ENSMUSG00000041891	2398	3375	2744	2898	3060	2076	2834	3099	3138	2736	2565	2998	2695	3200	3571	Lman1	18	65980754	66022580	-	6411	protein_coding	lectin, mannose-binding, 1 [Source:MGI Symbol;Acc:MGI:1917611]	-	-
ENSMUSG00000039953	2128	2448	2828	2017	2770	3087	4142	4053	3687	3537	3666	2319	2360	2009	2287	Clstn1	4	149586468	149648899	+	4662	protein_coding	calsyntenin 1 [Source:MGI Symbol;Acc:MGI:1929895]	-	-
ENSMUSG00000036446	1205	2814	2868	2430	2059	2721	3964	4000	3955	3869	2803	2243	2724	2243	3440	Lum	10	97565128	97572703	+	2448	protein_coding	lumican [Source:MGI Symbol;Acc:MGI:109347]	-	-
ENSMUSG00000045973	2696	3015	2636	2460	2508	2549	3713	3623	3720	3550	2534	2570	2105	2682	2976	Slc25a51	4	45395923	45408766	-	5510	protein_coding	solute carrier family 25, member 51 [Source:MGI Symbol;Acc:MGI:2684984]	-	-
ENSMUSG00000059263	2925	2998	3029	2766	2605	2114	2968	2986	3023	2959	3442	2769	2861	2784	3076	Usp47	7	112023504	112111661	+	13755	protein_coding	ubiquitin specific peptidase 47 [Source:MGI Symbol;Acc:MGI:1922246]	-	-
ENSMUSG00000026748	3466	2795	2753	2581	3058	1808	2702	2219	2708	2223	2474	3472	3691	3115	4183	Plxdc2	2	16356304	16755839	+	6947	protein_coding	plexin domain containing 2 [Source:MGI Symbol;Acc:MGI:1914698]	-	-
ENSMUSG00000040652	2106	2627	2516	2192	3266	3452	3370	3326	3653	3443	2270	2659	2474	2847	3000	Oaz2	9	65668001	65690300	+	2990	protein_coding	ornithine decarboxylase antizyme 2 [Source:MGI Symbol;Acc:MGI:109492]	-	-
ENSMUSG00000062901	3561	2336	3064	2575	2884	1902	2790	2813	3389	2910	3703	3256	2491	2577	2908	Klhl24	16	20097542	20129221	+	10183	protein_coding	kelch-like 24 [Source:MGI Symbol;Acc:MGI:1923035]	-	-
ENSMUSG00000031812	2630	2658	2788	2320	2925	2887	3226	3448	3388	3274	2586	2639	2904	2375	3103	Map1lc3b	8	121590361	121598760	+	7517	protein_coding	microtubule-associated protein 1 light chain 3 beta [Source:MGI Symbol;Acc:MGI:1914693]	-	-
ENSMUSG00000025103	2239	3056	3249	3239	2442	1985	3024	3211	3344	3262	2914	2902	2455	2693	3121	Btbd1	7	81792074	81829431	-	3471	protein_coding	BTB (POZ) domain containing 1 [Source:MGI Symbol;Acc:MGI:1933765]	-	-
ENSMUSG00000027288	2879	2799	2931	2397	2621	1906	3553	3907	3259	3622	3373	2519	2223	2156	2953	Zfp106	2	120506820	120563843	-	10429	protein_coding	zinc finger protein 106 [Source:MGI Symbol;Acc:MGI:1270153]	-	-
ENSMUSG00000030201	3803	2942	2340	2380	2291	1913	3893	3672	3342	3625	3408	2532	2073	2053	2830	Lrp6	6	134446476	134566965	-	13672	protein_coding	low density lipoprotein receptor-related protein 6 [Source:MGI Symbol;Acc:MGI:1298218]	-	-
ENSMUSG00000031529	3202	2887	2675	2861	2845	1258	2605	2942	2652	2713	3739	3558	2729	2776	3627	Tnks	8	34826460	34965690	-	14888	protein_coding	tankyrase, TRF1-interacting ankyrin-related ADP-ribose polymerase [Source:MGI Symbol;Acc:MGI:1341087]	-	-
ENSMUSG00000030058	2619	3173	2994	2411	2998	2359	2925	3336	2990	3085	3039	2406	2560	2821	3287	Copg1	6	87887814	87913595	+	11011	protein_coding	coatomer protein complex, subunit gamma 1 [Source:MGI Symbol;Acc:MGI:1858696]	-	-
ENSMUSG00000026842	2746	2591	2588	2336	3009	2991	3296	3376	3125	3183	2913	2820	2764	2450	2799	Abl1	2	31688376	31804227	+	11596	protein_coding	c-abl oncogene 1, non-receptor tyrosine kinase [Source:MGI Symbol;Acc:MGI:87859]	-	-
ENSMUSG00000030530	4241	3226	3191	2389	2693	1985	3492	2777	3696	2513	3734	2410	1952	2407	2281	Furin	7	80388585	80405436	-	9178	protein_coding	furin (paired basic amino acid cleaving enzyme) [Source:MGI Symbol;Acc:MGI:97513]	-	-
ENSMUSG00000034243	3961	2559	2680	2255	2924	2618	3177	3305	2907	3127	3379	2349	2225	2994	2527	Golgb1	16	36875140	36933085	+	11862	protein_coding	golgi autoantigen, golgin subfamily b, macrogolgin 1 [Source:MGI Symbol;Acc:MGI:1099447]	-	-
ENSMUSG00000022710	2553	2960	2717	2589	2882	2280	3042	3296	3089	2851	3021	2854	2523	2987	3332	Usp7	16	8689595	8792308	-	7766	protein_coding	ubiquitin specific peptidase 7 [Source:MGI Symbol;Acc:MGI:2182061]	-	-
ENSMUSG00000031446	2153	2988	2495	2698	2515	2256	3371	3833	3402	3563	2563	3021	2364	2626	3121	Cul4a	8	13105621	13147940	+	6408	protein_coding	cullin 4A [Source:MGI Symbol;Acc:MGI:1914487]	-	-
ENSMUSG00000035227	1934	2757	2891	2884	2880	2722	2942	3162	2820	3078	2712	2698	3102	2834	3534	Spcs2	7	99837569	99863462	-	4221	protein_coding	signal peptidase complex subunit 2 homolog (S. cerevisiae) [Source:MGI Symbol;Acc:MGI:1913874]	-	-
ENSMUSG00000022812	3550	2618	3412	2570	2515	1838	2979	3284	3140	3157	4144	2577	2366	2322	2454	Gsk3b	16	38089001	38246084	+	9831	protein_coding	glycogen synthase kinase 3 beta [Source:MGI Symbol;Acc:MGI:1861437]	-	-
ENSMUSG00000015755	2628	3055	3149	2778	2917	1940	3202	3004	2997	2860	2894	2839	3038	2581	3031	Tab2	10	7905653	7956230	-	6135	protein_coding	TGF-beta activated kinase 1/MAP3K7 binding protein 2 [Source:MGI Symbol;Acc:MGI:1915902]	-	-
ENSMUSG00000003660	3750	2740	2618	2380	2296	1746	3173	3191	3169	3039	4535	2775	2068	2305	3116	Snrnp200	2	127208386	127240451	+	7819	protein_coding	small nuclear ribonucleoprotein 200 (U5) [Source:MGI Symbol;Acc:MGI:2444401]	-	-
ENSMUSG00000021264	3067	3013	2939	2512	2846	2246	3100	3439	3192	3247	2869	2535	2518	2699	2673	Yy1	12	108792973	108820148	+	6418	protein_coding	YY1 transcription factor [Source:MGI Symbol;Acc:MGI:99150]	C2H2	C2H2
ENSMUSG00000029581	3249	3044	2790	3931	3439	1325	1420	1464	1378	1454	2805	3291	2288	4160	6837	Fscn1	5	142960343	142973185	+	3012	protein_coding	fascin actin-bundling protein 1 [Source:MGI Symbol;Acc:MGI:1352745]	-	-
ENSMUSG00000003072	2020	2991	2732	2556	3408	3975	3128	3113	3046	3152	1836	2430	2805	2582	3086	Atp5d	10	80138632	80145818	+	1928	protein_coding	ATP synthase, H+ transporting, mitochondrial F1 complex, delta subunit [Source:MGI Symbol;Acc:MGI:1913293]	-	-
ENSMUSG00000004040	2216	3033	2822	2795	2436	2583	3889	3778	3675	3313	3335	2300	2556	1906	2190	Stat3	11	100885098	100939540	-	9527	protein_coding	signal transducer and activator of transcription 3 [Source:MGI Symbol;Acc:MGI:103038]	-	-
ENSMUSG00000024735	1972	2983	2604	2681	3390	2220	2729	3165	2742	3035	2254	3126	3230	2919	3776	Prpf19	19	10895231	10909559	+	7278	protein_coding	pre-mRNA processing factor 19 [Source:MGI Symbol;Acc:MGI:106247]	-	-
ENSMUSG00000027340	2491	3416	2778	3058	1957	1994	3813	3473	3551	3289	3519	2563	1764	2873	2278	Slc23a2	2	132052496	132145108	-	7951	protein_coding	solute carrier family 23 (nucleobase transporters), member 2 [Source:MGI Symbol;Acc:MGI:1859682]	-	-
ENSMUSG00000032042	2247	3069	2824	2428	2470	2304	3504	3512	3358	3684	3086	2331	2595	2195	3167	Srpr	9	35200175	35247973	+	3364	protein_coding	signal recognition particle receptor ('docking protein') [Source:MGI Symbol;Acc:MGI:1914648]	-	-
ENSMUSG00000002748	3280	3105	2605	2467	2670	2337	2887	2905	2989	2972	3250	2650	2319	3123	3178	Baz1b	5	135187264	135246129	+	13667	protein_coding	bromodomain adjacent to zinc finger domain, 1B [Source:MGI Symbol;Acc:MGI:1353499]	PHD	PHD
ENSMUSG00000029826	4303	2795	3073	2355	2242	2366	2885	3477	3133	3423	3122	2076	2131	2446	2884	Zc3hav1	6	38305286	38354603	-	6518	protein_coding	zinc finger CCCH type, antiviral 1 [Source:MGI Symbol;Acc:MGI:1926031]	-	-
ENSMUSG00000020664	1586	3026	2825	3136	2656	2353	3454	3662	3281	3516	2165	2647	2744	2523	3117	Dld	12	31331277	31351453	-	3683	protein_coding	dihydrolipoamide dehydrogenase [Source:MGI Symbol;Acc:MGI:107450]	-	-
ENSMUSG00000032340	3002	2452	2665	2406	2985	1894	3274	3454	3199	3221	3789	2708	2315	2039	3238	Neo1	9	58874687	59036441	-	8716	protein_coding	neogenin [Source:MGI Symbol;Acc:MGI:1097159]	-	-
ENSMUSG00000014077	2902	3009	2468	2337	1957	2326	4080	4026	3924	3990	2645	1904	2031	2111	2899	Chp1	2	119547697	119587027	+	3499	protein_coding	calcineurin-like EF hand protein 1 [Source:MGI Symbol;Acc:MGI:1927185]	-	-
ENSMUSG00000020496	2543	2962	3177	2581	2917	2555	3050	3198	3091	3064	3255	2402	2699	2347	2737	Rnf187	11	58932288	58938916	-	1949	protein_coding	ring finger protein 187 [Source:MGI Symbol;Acc:MGI:1914224]	-	-
ENSMUSG00000022698	2323	3406	3308	3139	2504	1391	2981	2927	2726	2709	3047	2883	2741	2860	3606	Naa50	16	44139830	44163366	+	4648	protein_coding	N(alpha)-acetyltransferase 50, NatE catalytic subunit [Source:MGI Symbol;Acc:MGI:1919367]	GNAT	GNAT
ENSMUSG00000045767	1971	2888	2554	2856	2545	1748	3563	3545	3563	3468	3040	2866	2586	2411	2943	B230219D22Rik	13	55693124	55703500	+	4652	protein_coding	RIKEN cDNA B230219D22 gene [Source:MGI Symbol;Acc:MGI:1925771]	-	-
ENSMUSG00000034205	4640	3222	2461	2118	2636	2257	2828	2669	3449	2759	1858	2500	2563	3536	3042	Loxl2	14	69609068	69695834	+	5405	protein_coding	lysyl oxidase-like 2 [Source:MGI Symbol;Acc:MGI:2137913]	-	-
ENSMUSG00000048154	4574	2401	2738	1738	3623	3215	2987	2935	2890	2990	2819	2297	2047	3126	2139	Kmt2d	15	98831669	98871204	-	19931	protein_coding	lysine (K)-specific methyltransferase 2D [Source:MGI Symbol;Acc:MGI:2682319]	PHD	PHD
ENSMUSG00000040850	2766	2874	2986	2819	2417	1672	3242	2974	3373	3147	3607	2670	2533	2649	2776	Psme4	11	30771726	30880361	+	8382	protein_coding	proteasome (prosome, macropain) activator subunit 4 [Source:MGI Symbol;Acc:MGI:2143994]	-	-
ENSMUSG00000026615	3327	3462	3059	2877	2513	1830	2545	2879	2917	2567	3344	2709	2153	2881	3411	Eprs	1	185363044	185428360	+	18102	protein_coding	glutamyl-prolyl-tRNA synthetase [Source:MGI Symbol;Acc:MGI:97838]	-	-
ENSMUSG00000005779	1969	3100	2780	2761	3095	3543	2749	3105	2863	3110	1804	2727	2671	2972	3128	Psmb4	3	94884093	94886961	-	1951	protein_coding	proteasome (prosome, macropain) subunit, beta type 4 [Source:MGI Symbol;Acc:MGI:1098257]	-	-
ENSMUSG00000024294	2383	2798	2625	2572	2310	1885	3735	3586	3613	3326	3380	2837	2505	2206	2613	Mib1	18	10725548	10818704	+	10369	protein_coding	mindbomb E3 ubiquitin protein ligase 1 [Source:MGI Symbol;Acc:MGI:2443157]	-	-
ENSMUSG00000017291	2475	2843	2642	2901	2522	1908	3381	3502	3552	3392	2934	2815	2353	2551	2576	Taok1	11	77529162	77607815	-	12421	protein_coding	TAO kinase 1 [Source:MGI Symbol;Acc:MGI:1914490]	-	-
ENSMUSG00000004789	2264	3051	3006	2754	2640	2320	3040	3214	3087	3227	2796	2566	2454	2731	3172	Dlst	12	85110833	85134845	+	9559	protein_coding	dihydrolipoamide S-succinyltransferase (E2 component of 2-oxo-glutarate complex) [Source:MGI Symbol;Acc:MGI:1926170]	-	-
ENSMUSG00000031672	2643	2876	3301	2676	2550	2986	2563	3067	2817	2732	2828	2484	3216	2709	2846	Got2	8	95864134	95888547	-	4824	protein_coding	glutamatic-oxaloacetic transaminase 2, mitochondrial [Source:MGI Symbol;Acc:MGI:95792]	-	-
ENSMUSG00000056515	1744	2586	2680	2394	2924	1995	4028	4189	4806	3855	2296	2253	1819	2056	2665	Rab31	17	65651729	65772752	-	3813	protein_coding	RAB31, member RAS oncogene family [Source:MGI Symbol;Acc:MGI:1914603]	-	-
ENSMUSG00000047731	3179	3091	2812	2490	2294	2620	3679	3438	3547	2995	2916	2275	2159	2233	2548	Wbp1l	19	46599084	46657389	+	4463	protein_coding	WW domain binding protein 1 like [Source:MGI Symbol;Acc:MGI:107577]	-	-
ENSMUSG00000020859	1925	2743	2485	2381	2823	2337	3503	3116	3432	3332	2806	3048	2682	2628	3008	Spag9	11	93996091	94126085	+	11209	protein_coding	sperm associated antigen 9 [Source:MGI Symbol;Acc:MGI:1918084]	-	-
ENSMUSG00000026457	2662	2726	2816	2202	2659	2440	3346	3578	3288	3470	2873	2525	2511	2248	2898	Adipor1	1	134415378	134433351	+	5025	protein_coding	adiponectin receptor 1 [Source:MGI Symbol;Acc:MGI:1919924]	-	-
ENSMUSG00000029328	1523	2487	2221	2452	3936	3203	2731	2839	2353	2413	1883	3323	3252	3802	3806	Hnrnpdl	5	100033577	100039664	-	4818	protein_coding	heterogeneous nuclear ribonucleoprotein D-like [Source:MGI Symbol;Acc:MGI:1355299]	-	-
ENSMUSG00000007880	2928	2941	2627	2465	2650	1930	3320	3563	3461	3179	3606	2707	2005	2281	2550	Arid1a	4	133679008	133756769	-	11476	protein_coding	AT rich interactive domain 1A (SWI-like) [Source:MGI Symbol;Acc:MGI:1935147]	ARID	ARID
ENSMUSG00000021273	1449	2160	2330	2729	2300	4106	3172	5270	3396	5348	1744	1883	2032	2150	2097	Fdft1	14	63145150	63179578	-	4227	protein_coding	farnesyl diphosphate farnesyl transferase 1 [Source:MGI Symbol;Acc:MGI:102706]	-	-
ENSMUSG00000022051	3499	2504	2876	2362	2776	1852	2895	3025	3071	3162	3117	2526	2721	2346	3429	Bnip3l	14	66985239	67008877	-	3859	protein_coding	BCL2/adenovirus E1B interacting protein 3-like [Source:MGI Symbol;Acc:MGI:1332659]	-	-
ENSMUSG00000021065	2471	3326	4007	5015	2024	1348	1985	2022	2331	2149	3445	4172	1879	3424	2538	Fut8	12	77238125	77476338	+	7902	protein_coding	fucosyltransferase 8 [Source:MGI Symbol;Acc:MGI:1858901]	-	-
ENSMUSG00000005615	3020	3695	2781	1716	2718	1412	4308	3094	5440	3755	2779	1381	2097	1894	2042	Pcyt1a	16	32430921	32475070	+	7412	protein_coding	phosphate cytidylyltransferase 1, choline, alpha isoform [Source:MGI Symbol;Acc:MGI:88557]	-	-
ENSMUSG00000020592	2121	4242	4046	3441	6122	848	1322	779	2110	774	2390	2259	4365	3995	3307	Sdc1	12	8771323	8793715	+	3809	protein_coding	syndecan 1 [Source:MGI Symbol;Acc:MGI:1349162]	-	-
ENSMUSG00000029287	2585	2826	1685	1613	1898	2496	5400	5005	4120	4915	1887	1722	1954	1362	2632	Tgfbr3	5	107106570	107289629	-	6545	protein_coding	transforming growth factor, beta receptor III [Source:MGI Symbol;Acc:MGI:104637]	-	-
ENSMUSG00000032449	2339	2788	2831	2457	2798	2818	2597	3150	2586	2991	2272	3078	3171	3413	2781	Slc25a36	9	97074961	97111157	-	9594	protein_coding	solute carrier family 25, member 36 [Source:MGI Symbol;Acc:MGI:1924909]	-	-
ENSMUSG00000036644	3087	2024	2686	1940	2573	2378	3826	4278	3548	4140	2974	2277	2063	1779	2447	Tbc1d9b	11	50131396	50172785	+	6429	protein_coding	TBC1 domain family, member 9B [Source:MGI Symbol;Acc:MGI:1924045]	-	-
ENSMUSG00000067818	1729	3434	3370	2061	3678	2237	3499	2259	1962	2097	4358	2265	3671	2192	3206	Myl9	2	156775420	156781658	+	1162	protein_coding	myosin, light polypeptide 9, regulatory [Source:MGI Symbol;Acc:MGI:2138915]	-	-
ENSMUSG00000034252	2422	2666	3011	2735	3094	2441	2696	2821	2750	2882	2453	2915	3043	3160	2916	Senp6	9	80066903	80144953	+	7016	protein_coding	SUMO/sentrin specific peptidase 6 [Source:MGI Symbol;Acc:MGI:1922075]	-	-
ENSMUSG00000033577	2769	2086	2653	1827	3043	2014	2959	4238	3096	4041	3273	2490	2241	2235	3004	Myo6	9	80165031	80311729	+	12078	protein_coding	myosin VI [Source:MGI Symbol;Acc:MGI:104785]	-	-
ENSMUSG00000027012	2526	3129	3143	2913	2680	2131	2732	2487	3090	2673	2743	2793	2854	2859	3209	Dync1i2	2	71211706	71263303	+	8280	protein_coding	dynein cytoplasmic 1 intermediate chain 2 [Source:MGI Symbol;Acc:MGI:107750]	-	-
ENSMUSG00000025558	1642	1734	2247	2378	3606	2170	2340	4117	2649	3353	2632	3249	2972	2819	4017	Dock9	14	121542046	121797837	-	13245	protein_coding	dedicator of cytokinesis 9 [Source:MGI Symbol;Acc:MGI:106321]	-	-
ENSMUSG00000063511	1607	2320	2062	2026	3745	4971	2866	2900	3038	2825	1708	3133	2479	3522	2721	Snrnp70	7	45376453	45395742	-	7618	protein_coding	small nuclear ribonucleoprotein 70 (U1) [Source:MGI Symbol;Acc:MGI:98341]	-	-
ENSMUSG00000004364	2426	2910	3171	2804	2520	1670	2872	3029	2946	2832	3047	2787	2869	2687	3351	Cul3	1	80264923	80340480	-	4873	protein_coding	cullin 3 [Source:MGI Symbol;Acc:MGI:1347360]	-	-
ENSMUSG00000068882	1905	3220	3080	2995	2530	2330	2193	2497	2415	2707	2227	3017	3313	3836	3645	Ssb	2	69861562	69871846	+	2160	protein_coding	Sjogren syndrome antigen B [Source:MGI Symbol;Acc:MGI:98423]	-	-
ENSMUSG00000056342	3517	3078	2711	2479	2092	1586	3352	3392	3355	3296	3648	2678	1970	2192	2551	Usp34	11	23306895	23490560	+	18453	protein_coding	ubiquitin specific peptidase 34 [Source:MGI Symbol;Acc:MGI:109473]	-	-
ENSMUSG00000018677	2437	3425	3003	2738	2797	3084	3207	3156	3274	3048	2453	2189	2223	2397	2465	Slc25a39	11	102402985	102407946	-	2756	protein_coding	solute carrier family 25, member 39 [Source:MGI Symbol;Acc:MGI:1196386]	-	-
ENSMUSG00000031825	5104	4146	2614	2580	3453	1663	2322	2192	1792	2129	2162	2413	2597	2891	3809	Crispld2	8	119992438	120052793	+	4777	protein_coding	cysteine-rich secretory protein LCCL domain containing 2 [Source:MGI Symbol;Acc:MGI:1926142]	-	-
ENSMUSG00000037475	2438	3148	2766	2708	2374	2324	2753	2854	2994	3039	2856	3082	2453	2992	3056	Thoc2	X	41794991	41920674	-	12666	protein_coding	THO complex 2 [Source:MGI Symbol;Acc:MGI:2442413]	-	-
ENSMUSG00000037242	2417	3338	3042	2602	2468	1578	3872	2957	2965	2896	3787	2450	2845	1813	2798	Clic4	4	135213969	135272814	-	6572	protein_coding	chloride intracellular channel 4 (mitochondrial) [Source:MGI Symbol;Acc:MGI:1352754]	-	-
ENSMUSG00000021792	2780	2781	3499	2361	3309	3295	2728	4279	2386	4135	1437	2123	2479	1909	2277	Fam213a	14	40993740	41013788	-	2948	protein_coding	family with sequence similarity 213, member A [Source:MGI Symbol;Acc:MGI:1917814]	-	-
ENSMUSG00000020484	2479	3136	2907	2392	2745	2394	2723	2866	2665	2745	3147	2529	3263	2551	3228	Xbp1	11	5520659	5525893	+	3248	protein_coding	X-box binding protein 1 [Source:MGI Symbol;Acc:MGI:98970]	bZIP	bZIP
ENSMUSG00000019173	2035	2652	2765	2430	3273	3624	3181	3363	3324	3282	2227	2536	2142	2366	2559	Rab5c	11	100715009	100738215	-	2194	protein_coding	RAB5C, member RAS oncogene family [Source:MGI Symbol;Acc:MGI:105306]	-	-
ENSMUSG00000023118	3542	2929	2545	2301	2943	2341	2755	2912	2878	2837	3122	2443	2505	2477	3193	Sympk	7	19024377	19054618	+	10534	protein_coding	symplekin [Source:MGI Symbol;Acc:MGI:1915438]	-	-
ENSMUSG00000021996	3339	3730	3046	3287	2331	2590	2426	2367	2531	2518	2129	2429	2695	3136	3168	Esd	14	74732297	74750765	+	3366	protein_coding	esterase D/formylglutathione hydrolase [Source:MGI Symbol;Acc:MGI:95421]	-	-
ENSMUSG00000024012	2514	2541	2901	2247	3050	2565	3443	3321	3365	3157	3460	2408	2067	2086	2595	Mtch1	17	29332072	29347904	-	2878	protein_coding	mitochondrial carrier 1 [Source:MGI Symbol;Acc:MGI:1929261]	-	-
ENSMUSG00000022201	2423	3464	2979	3386	2601	1678	2667	2811	2925	2973	2674	2701	2531	2578	3297	Zfr	15	12117831	12185683	+	5911	protein_coding	zinc finger RNA binding protein [Source:MGI Symbol;Acc:MGI:1341890]	-	-
ENSMUSG00000066551	2354	2810	3171	3001	2764	2069	2119	2347	2121	2416	2889	2981	3424	3340	3855	Hmgb1	5	149046702	149184489	-	5023	protein_coding	high mobility group box 1 [Source:MGI Symbol;Acc:MGI:96113]	HMG	HMG
ENSMUSG00000064210	3061	2162	2709	2077	2299	1964	3820	3833	3400	3335	3896	2475	2407	1677	2544	Ano6	15	95790843	95974751	+	12269	protein_coding	anoctamin 6 [Source:MGI Symbol;Acc:MGI:2145890]	-	-
ENSMUSG00000028603	1828	2942	2866	2126	2915	2795	3706	3117	3930	3013	2369	2043	2704	2613	2689	Scp2	4	108043839	108144998	-	3478	protein_coding	sterol carrier protein 2, liver [Source:MGI Symbol;Acc:MGI:98254]	-	-
ENSMUSG00000037253	1603	2598	2282	3554	3450	1313	1624	1816	1632	1830	2786	4222	3757	4032	5153	Mex3c	18	73573044	73592575	+	3738	protein_coding	mex3 RNA binding family member C [Source:MGI Symbol;Acc:MGI:2652843]	-	-
ENSMUSG00000020741	2077	3023	2276	2282	2796	2584	3545	4017	3486	3702	2415	2228	1844	2183	3122	Cluh	11	74649495	74670847	+	6502	protein_coding	clustered mitochondria (cluA/CLU1) homolog [Source:MGI Symbol;Acc:MGI:1921398]	-	-
ENSMUSG00000042650	4144	2540	2745	2200	2114	1524	3326	3420	3066	3062	4907	2063	2116	1804	2521	Alkbh5	11	60536381	60558512	+	5987	protein_coding	alkB homolog 5, RNA demethylase [Source:MGI Symbol;Acc:MGI:2144489]	-	-
ENSMUSG00000029004	3126	2701	2942	2605	2774	1984	2916	3173	3031	2978	2855	2687	2389	2904	2483	Kmt2e	5	23434441	23504235	+	10444	protein_coding	lysine (K)-specific methyltransferase 2E [Source:MGI Symbol;Acc:MGI:1924825]	PHD	PHD
ENSMUSG00000037058	2061	2935	2708	2770	2740	2632	2584	2803	2871	2818	2116	2899	3036	3234	3330	Paip2	18	35598617	35617186	+	2789	protein_coding	polyadenylate-binding protein-interacting protein 2 [Source:MGI Symbol;Acc:MGI:1915119]	-	-
ENSMUSG00000004508	2655	1918	2926	2054	4404	1701	2960	4015	2681	3248	2276	2818	2433	1726	3719	Gab2	7	97081586	97308946	+	6168	protein_coding	growth factor receptor bound protein 2-associated protein 2 [Source:MGI Symbol;Acc:MGI:1333854]	-	-
ENSMUSG00000024908	2492	3008	2945	2677	2641	2127	3100	3370	3001	3117	2924	2519	2248	2414	2951	Ppp6r3	19	3454928	3575749	-	9378	protein_coding	protein phosphatase 6, regulatory subunit 3 [Source:MGI Symbol;Acc:MGI:1921807]	-	-
ENSMUSG00000017760	2021	2869	2610	2565	3249	2951	2702	2385	2593	2426	2270	3056	3006	3075	3660	Ctsa	2	164832873	164841032	+	4715	protein_coding	cathepsin A [Source:MGI Symbol;Acc:MGI:97748]	-	-
ENSMUSG00000022533	2540	3275	2810	2720	2734	1373	3301	2849	3524	2649	3707	2798	2254	2453	2433	Atp13a3	16	30312423	30405975	-	9938	protein_coding	ATPase type 13A3 [Source:MGI Symbol;Acc:MGI:2685387]	-	-
ENSMUSG00000037235	3134	2349	2536	1656	2346	2797	3626	3420	3817	3722	3243	2296	2130	1885	2446	Mxd4	5	34173883	34187720	-	8483	protein_coding	Max dimerization protein 4 [Source:MGI Symbol;Acc:MGI:104991]	bHLH	bHLH
ENSMUSG00000001911	3639	2745	2619	1893	2666	2316	3450	3329	3174	3070	3878	1968	2674	1664	2301	Nfix	8	84699876	84800344	-	7351	protein_coding	nuclear factor I/X [Source:MGI Symbol;Acc:MGI:97311]	-	-
ENSMUSG00000044986	1951	2927	2696	2574	2880	3604	3255	3104	3769	3347	1648	2225	2221	2467	2699	Tst	15	78399556	78405907	-	3163	protein_coding	thiosulfate sulfurtransferase, mitochondrial [Source:MGI Symbol;Acc:MGI:98852]	-	-
ENSMUSG00000030199	3175	3306	3386	3002	2774	1912	2483	2621	2996	2472	3104	2661	2046	2800	2628	Etv6	6	134035700	134270158	+	5983	protein_coding	ets variant 6 [Source:MGI Symbol;Acc:MGI:109336]	-	-
ENSMUSG00000024308	2328	2608	3463	2292	2491	2863	3439	3275	3478	3213	3349	2146	2313	1882	2219	Tapbp	17	33915899	33929288	+	3296	protein_coding	TAP binding protein [Source:MGI Symbol;Acc:MGI:1201689]	-	-
ENSMUSG00000005312	2474	2969	2807	2767	2451	1791	2982	3382	2938	3080	3502	2553	2419	2317	2901	Ubqln1	13	58176156	58215653	-	4406	protein_coding	ubiquilin 1 [Source:MGI Symbol;Acc:MGI:1860276]	-	-
ENSMUSG00000031696	2298	2980	2836	2993	2207	1401	3577	3217	3368	3103	3055	2678	2255	2231	3114	Vps35	8	85260392	85299802	-	8899	protein_coding	VPS35 retromer complex component [Source:MGI Symbol;Acc:MGI:1890467]	-	-
ENSMUSG00000014769	2034	3033	3003	2849	2929	3055	2456	2772	2628	2899	2335	2722	2574	2826	3184	Psmb1	17	15475021	15499751	-	4595	protein_coding	proteasome (prosome, macropain) subunit, beta type 1 [Source:MGI Symbol;Acc:MGI:104884]	-	-
ENSMUSG00000025404	2758	2469	2587	2751	3220	1959	2277	2779	2553	2500	3150	3391	3034	2668	3185	R3hdm2	10	127380327	127499384	+	5987	protein_coding	R3H domain containing 2 [Source:MGI Symbol;Acc:MGI:1919000]	-	-
ENSMUSG00000027602	2065	2658	2026	1793	2238	3624	4476	4027	4466	3991	1636	1910	1997	2154	2206	Map1lc3a	2	155276297	155278073	+	1181	protein_coding	microtubule-associated protein 1 light chain 3 alpha [Source:MGI Symbol;Acc:MGI:1915661]	-	-
ENSMUSG00000049327	2101	3552	3238	3658	2532	2440	2584	2424	2754	2528	2490	2732	2559	2735	2913	Kmt5a	5	124439930	124462308	+	5307	protein_coding	lysine methyltransferase 5A [Source:MGI Symbol;Acc:MGI:1915206]	SET	SET
ENSMUSG00000034290	2782	2522	2585	2138	2596	2189	3751	3504	3202	3325	3419	2540	1992	2062	2605	Nek9	12	85299514	85339362	-	5386	protein_coding	NIMA (never in mitosis gene a)-related expressed kinase 9 [Source:MGI Symbol;Acc:MGI:2387995]	-	-
ENSMUSG00000022272	2508	2278	2016	1871	2723	2190	3626	3741	3876	3748	2859	2255	2321	2287	2902	Myo10	15	25622525	25813673	+	10122	protein_coding	myosin X [Source:MGI Symbol;Acc:MGI:107716]	-	-
ENSMUSG00000002052	2907	2618	2871	2261	2773	2270	3084	3275	3191	3084	3246	2362	2039	2356	2851	Supt6	11	78206746	78245987	-	7095	protein_coding	suppressor of Ty 6 [Source:MGI Symbol;Acc:MGI:107726]	-	-
ENSMUSG00000073557	2876	2758	2530	2036	2543	2193	4271	3374	3402	3251	3426	2019	2399	1648	2459	Ppp1r12b	1	134754658	134955942	-	14983	protein_coding	protein phosphatase 1, regulatory subunit 12B [Source:MGI Symbol;Acc:MGI:1916417]	-	-
ENSMUSG00000028961	3085	2815	2565	2100	2734	3078	3102	3457	3217	3508	2249	2099	2351	2293	2481	Pgd	4	149149991	149166771	-	6447	protein_coding	phosphogluconate dehydrogenase [Source:MGI Symbol;Acc:MGI:97553]	-	-
ENSMUSG00000020923	1909	2778	2282	2303	3011	3082	3136	3357	3114	3092	2435	2536	2373	2560	3156	Ubtf	11	102304560	102319742	-	6552	protein_coding	upstream binding transcription factor, RNA polymerase I [Source:MGI Symbol;Acc:MGI:98512]	HMG	HMG
ENSMUSG00000024556	2426	2524	3225	3193	4009	1694	2151	3070	2264	2644	2526	3087	1995	2284	3983	Me2	18	73770040	73815392	-	2455	protein_coding	malic enzyme 2, NAD(+)-dependent, mitochondrial [Source:MGI Symbol;Acc:MGI:2147351]	-	-
ENSMUSG00000079435	1488	2675	2764	3199	2842	2652	2132	2169	2117	2173	1862	3563	3055	3552	4831	Rpl36a	X	134585654	134588062	+	1655	protein_coding	ribosomal protein L36A [Source:MGI Symbol;Acc:MGI:1201789]	-	-
ENSMUSG00000047213	2026	2735	2936	2733	2660	2271	2538	2848	2743	2978	2595	2787	3171	3119	2903	Ythdf3	3	16183212	16217037	+	5363	protein_coding	YTH domain family 3 [Source:MGI Symbol;Acc:MGI:1918850]	-	-
ENSMUSG00000032293	2461	2754	2817	2762	2557	1888	2933	3169	3023	3116	2726	2527	2607	2816	2870	Ireb2	9	54863789	54912530	+	9479	protein_coding	iron responsive element binding protein 2 [Source:MGI Symbol;Acc:MGI:1928268]	-	-
ENSMUSG00000096210	2391	2764	3093	2790	3266	2552	2804	3018	2329	2407	2372	2717	2510	2755	3233	H1f0	15	79028450	79030504	+	2055	protein_coding	H1 histone family, member 0 [Source:MGI Symbol;Acc:MGI:95893]	-	-
ENSMUSG00000030884	2241	2901	3026	2685	2649	2301	2744	2944	2706	2853	2500	2906	2555	2835	3129	Uqcrc2	7	120635176	120659524	+	2552	protein_coding	ubiquinol cytochrome c reductase core protein 2 [Source:MGI Symbol;Acc:MGI:1914253]	-	-
ENSMUSG00000073639	1926	2738	2643	2737	2685	1667	3124	3319	3043	3181	2343	2753	2942	2515	3359	Rab18	18	6765205	6790231	+	2257	protein_coding	RAB18, member RAS oncogene family [Source:MGI Symbol;Acc:MGI:102790]	-	-
ENSMUSG00000010097	1672	2807	2386	2644	3159	3858	2620	2605	2631	2809	1238	2731	3561	3155	3072	Nxf1	19	8757073	8772475	+	5980	protein_coding	nuclear RNA export factor 1 [Source:MGI Symbol;Acc:MGI:1858330]	-	-
ENSMUSG00000027366	2914	3053	2896	2474	2352	2087	3335	3290	3206	3200	2740	2232	2509	2185	2473	Sppl2a	2	126890391	126933235	-	8665	protein_coding	signal peptide peptidase like 2A [Source:MGI Symbol;Acc:MGI:1913802]	-	-
ENSMUSG00000020440	2391	2588	2953	2641	3645	3733	2217	2734	2248	2556	1900	2256	2926	2858	3227	Arf5	6	28423560	28426602	+	1907	protein_coding	ADP-ribosylation factor 5 [Source:MGI Symbol;Acc:MGI:99434]	-	-
ENSMUSG00000017843	2443	2748	2884	2681	2542	1964	2919	3075	3044	2726	2703	2778	2712	2524	3116	Ppp2r5c	12	110447120	110583062	+	8286	protein_coding	protein phosphatase 2, regulatory subunit B', gamma [Source:MGI Symbol;Acc:MGI:1349475]	-	-
ENSMUSG00000029344	1406	2753	2622	2359	2672	3901	3429	2653	5032	2653	2191	2600	1620	2595	2213	Tpst2	5	112276691	112315361	+	2793	protein_coding	protein-tyrosine sulfotransferase 2 [Source:MGI Symbol;Acc:MGI:1309516]	-	-
ENSMUSG00000015839	1493	2841	2472	3151	2331	2124	3078	3687	2944	3364	2720	2415	2616	2521	2929	Nfe2l2	2	75675513	75704641	-	3796	protein_coding	nuclear factor, erythroid derived 2, like 2 [Source:MGI Symbol;Acc:MGI:108420]	bZIP	bZIP
ENSMUSG00000061032	2431	2373	2810	2313	2972	2889	2566	2817	2477	2562	3590	2407	2629	2700	3125	Rrp1	10	78400384	78413043	-	3337	protein_coding	ribosomal RNA processing 1 homolog (S. cerevisiae) [Source:MGI Symbol;Acc:MGI:1203500]	-	-
ENSMUSG00000071072	2903	3177	3289	3484	2276	1737	1932	1856	2171	2219	3235	2631	3391	3067	3283	Ptges3	10	128058954	128077272	+	2217	protein_coding	prostaglandin E synthase 3 [Source:MGI Symbol;Acc:MGI:1929282]	-	-
ENSMUSG00000062908	1570	2769	2101	2090	2384	2925	3665	4338	3737	4500	1311	2344	1968	2374	2542	Acadm	3	153922357	153944632	-	3913	protein_coding	acyl-Coenzyme A dehydrogenase, medium chain [Source:MGI Symbol;Acc:MGI:87867]	-	-
ENSMUSG00000032737	3466	2526	2474	1899	3043	2764	3055	3461	3185	3158	2582	2034	1878	2249	2831	Inppl1	7	101822632	101838229	-	6399	protein_coding	inositol polyphosphate phosphatase-like 1 [Source:MGI Symbol;Acc:MGI:1333787]	-	-
ENSMUSG00000039168	1903	2383	2424	2319	3677	2701	2628	3402	3008	3211	1560	2492	3086	2404	3390	Dap	15	31224314	31274341	+	1925	protein_coding	death-associated protein [Source:MGI Symbol;Acc:MGI:1918190]	-	-
ENSMUSG00000008475	1860	2814	2814	2660	2685	2242	3106	3086	3093	2637	2198	2722	3017	2661	2959	Arpc5	1	152766542	152775597	+	2276	protein_coding	actin related protein 2/3 complex, subunit 5 [Source:MGI Symbol;Acc:MGI:1915021]	-	-
ENSMUSG00000041560	2147	2283	2808	2136	3089	2833	2883	2770	2567	2736	2960	2848	2651	2368	3466	Nop53	7	15936183	15946074	-	3847	protein_coding	NOP53 ribosome biogenesis factor [Source:MGI Symbol;Acc:MGI:2154441]	-	-
ENSMUSG00000022885	3530	2312	2665	1923	2387	1715	4000	4070	4114	3514	2921	1821	1492	1620	2422	St6gal1	16	23224740	23360350	+	4916	protein_coding	beta galactoside alpha 2,6 sialyltransferase 1 [Source:MGI Symbol;Acc:MGI:108470]	-	-
ENSMUSG00000028565	5389	2346	2841	2111	2322	2336	2562	2601	2475	2569	2929	2296	2748	2372	2586	Nfia	4	97772734	98118874	+	10891	protein_coding	nuclear factor I/A [Source:MGI Symbol;Acc:MGI:108056]	-	-
ENSMUSG00000032712	2349	2410	3116	2014	3092	2672	2318	3421	3011	4225	1828	2201	2882	2266	2671	Resf1	6	149309414	149335663	+	9629	protein_coding	retroelement silencing factor 1 [Source:MGI Symbol;Acc:MGI:1914496]	-	-
ENSMUSG00000035493	1979	2093	3023	2157	2542	2663	3549	2852	3629	3234	3193	2651	2435	1905	2533	Tgfbi	13	56609523	56639562	+	3771	protein_coding	transforming growth factor, beta induced [Source:MGI Symbol;Acc:MGI:99959]	-	-
ENSMUSG00000030213	3349	2482	2406	2279	2385	1885	3048	3041	3295	3502	3068	2632	1998	2167	2880	Atf7ip	6	136506167	136610862	+	20726	protein_coding	activating transcription factor 7 interacting protein [Source:MGI Symbol;Acc:MGI:1858965]	-	-
ENSMUSG00000022175	2443	2499	2600	2150	3028	3111	3175	2934	3312	3367	2695	2149	2268	2258	2427	Lrp10	14	54464137	54471497	+	4463	protein_coding	low-density lipoprotein receptor-related protein 10 [Source:MGI Symbol;Acc:MGI:1929480]	-	-
ENSMUSG00000038712	2443	3256	2737	2711	2448	2465	3047	2871	3042	2740	2279	2224	2068	2934	3108	Mindy1	3	95281345	95296166	+	6458	protein_coding	MINDY lysine 48 deubiquitinase 1 [Source:MGI Symbol;Acc:MGI:1922257]	-	-
ENSMUSG00000032481	3007	2838	2787	2674	2576	1482	2498	2745	2823	2523	3600	2995	2362	2397	3063	Smarcc1	9	110117708	110240178	+	7832	protein_coding	SWI/SNF related, matrix associated, actin dependent regulator of chromatin, subfamily c, member 1 [Source:MGI Symbol;Acc:MGI:1203524]	-	-
ENSMUSG00000043733	2421	2912	2410	2635	2330	1597	3537	3324	3271	3320	3318	2298	2098	2142	2756	Ptpn11	5	121130533	121191397	-	7492	protein_coding	protein tyrosine phosphatase, non-receptor type 11 [Source:MGI Symbol;Acc:MGI:99511]	-	-
ENSMUSG00000026229	3246	3149	3232	3179	2231	1713	2296	2605	2690	2546	3337	2344	1980	2789	3001	Psmd1	1	86064387	86139151	+	7265	protein_coding	proteasome (prosome, macropain) 26S subunit, non-ATPase, 1 [Source:MGI Symbol;Acc:MGI:1917497]	-	-
ENSMUSG00000000826	2537	2609	2587	2405	2651	2253	2976	3622	3027	2919	2706	2324	2461	2334	2902	Dnajc5	2	181520485	181555133	+	6953	protein_coding	DnaJ heat shock protein family (Hsp40) member C5 [Source:MGI Symbol;Acc:MGI:892995]	-	-
ENSMUSG00000037071	3312	2985	2067	2303	855	2454	4610	5325	3356	5675	2916	1110	920	1503	892	Scd1	19	44394451	44407709	-	4836	protein_coding	stearoyl-Coenzyme A desaturase 1 [Source:MGI Symbol;Acc:MGI:98239]	-	-
ENSMUSG00000074656	2627	3320	3215	2970	2425	2092	2211	2370	2270	2367	2497	2469	2878	3004	3490	Eif2s2	2	154871410	154892935	-	6755	protein_coding	eukaryotic translation initiation factor 2, subunit 2 (beta) [Source:MGI Symbol;Acc:MGI:1914454]	-	-
ENSMUSG00000021820	1756	2676	2193	2523	3067	3324	2720	3607	2935	3352	1815	2608	1767	2905	2922	Camk2g	14	20734875	20794088	-	6401	protein_coding	calcium/calmodulin-dependent protein kinase II gamma [Source:MGI Symbol;Acc:MGI:88259]	-	-
ENSMUSG00000036707	1991	2887	3167	3026	2072	1779	3162	3001	3091	2939	3424	2500	2349	2177	2507	Cab39	1	85793441	85851576	+	7077	protein_coding	calcium binding protein 39 [Source:MGI Symbol;Acc:MGI:107438]	-	-
ENSMUSG00000021610	2105	2748	2560	2331	2597	2148	3295	3226	3111	3151	2631	2187	2463	2256	3261	Clptm1l	13	73604006	73620605	+	3068	protein_coding	CLPTM1-like [Source:MGI Symbol;Acc:MGI:2442892]	-	-
ENSMUSG00000031119	2837	3067	2989	2693	3513	1663	2121	2722	2440	2346	2102	2760	2036	3061	3712	Gpc4	X	52053021	52165252	-	2651	protein_coding	glypican 4 [Source:MGI Symbol;Acc:MGI:104902]	-	-
ENSMUSG00000030002	1967	2930	2362	2598	2922	2554	2671	2766	2779	2910	2051	2806	2810	3151	2752	Dusp11	6	85942268	85961667	-	8754	protein_coding	dual specificity phosphatase 11 (RNA/RNP complex 1-interacting) [Source:MGI Symbol;Acc:MGI:1919352]	-	-
ENSMUSG00000020097	2495	2577	2714	2604	2416	1893	3161	3229	3497	3101	2992	2515	2095	1974	2734	Sgpl1	10	61098642	61147703	-	6143	protein_coding	sphingosine phosphate lyase 1 [Source:MGI Symbol;Acc:MGI:1261415]	-	-
ENSMUSG00000031601	1781	2743	2710	2934	2644	2705	2611	2905	2623	3102	1729	2610	2880	3149	2869	Cnot7	8	40492540	40515847	-	5821	protein_coding	CCR4-NOT transcription complex, subunit 7 [Source:MGI Symbol;Acc:MGI:1298230]	-	-
ENSMUSG00000035226	2877	3011	2516	2427	1714	2186	4101	4177	3661	3976	2571	2046	1115	1875	1709	Rims4	2	163859751	163918683	-	4962	protein_coding	regulating synaptic membrane exocytosis 4 [Source:MGI Symbol;Acc:MGI:2674366]	-	-
ENSMUSG00000019961	2196	3013	2350	2825	2943	1775	2264	2285	2128	2330	2579	3253	2952	3368	3669	Tmpo	10	91147571	91181315	-	10998	protein_coding	thymopoietin [Source:MGI Symbol;Acc:MGI:106920]	-	-
ENSMUSG00000002102	3013	2946	2924	2578	2910	2751	2318	2500	2291	2585	2403	2333	2270	2820	3250	Psmc3	2	91054009	91066369	+	2607	protein_coding	proteasome (prosome, macropain) 26S subunit, ATPase 3 [Source:MGI Symbol;Acc:MGI:1098754]	-	-
ENSMUSG00000005881	1663	2449	2581	2168	2725	3229	3250	3369	3393	3317	2176	2250	2284	2295	2719	Ergic3	2	156008045	156018279	+	2121	protein_coding	ERGIC and golgi 3 [Source:MGI Symbol;Acc:MGI:1913616]	-	-
ENSMUSG00000059208	2028	3039	2364	2789	2846	1941	2694	2658	2806	2659	2547	3238	2100	2865	3273	Hnrnpm	17	33646233	33686860	-	4701	protein_coding	heterogeneous nuclear ribonucleoprotein M [Source:MGI Symbol;Acc:MGI:1926465]	-	-
ENSMUSG00000037119	2415	3019	2544	2613	2221	1855	3430	3460	3270	3206	3121	2314	2152	1891	2298	Fam91a1	15	58415468	58457740	+	6627	protein_coding	family with sequence similarity 91, member A1 [Source:MGI Symbol;Acc:MGI:1277178]	-	-
ENSMUSG00000013236	3003	3246	3009	2956	3147	2174	2313	2155	2355	1943	2966	2433	2115	3119	2822	Ptprs	17	56412426	56476483	-	14990	protein_coding	protein tyrosine phosphatase, receptor type, S [Source:MGI Symbol;Acc:MGI:97815]	-	-
ENSMUSG00000021870	2004	3082	2607	2406	2247	1702	3196	3313	2780	3319	3259	2690	2530	2250	2357	Slmap	14	26413168	26534931	-	8054	protein_coding	sarcolemma associated protein [Source:MGI Symbol;Acc:MGI:1933549]	-	-
ENSMUSG00000046532	4027	2317	2262	1969	1878	1760	3649	3409	3282	3332	3528	2335	1865	1791	2305	Ar	X	98148769	98323215	+	10048	protein_coding	androgen receptor [Source:MGI Symbol;Acc:MGI:88064]	-	-
ENSMUSG00000044308	2326	2680	2478	2417	2091	1867	3639	3697	3518	3677	2863	2280	1828	2024	2319	Ubr3	2	69897246	70024013	+	9719	protein_coding	ubiquitin protein ligase E3 component n-recognin 3 [Source:MGI Symbol;Acc:MGI:1861100]	-	-
ENSMUSG00000049112	2217	4538	3278	4835	1285	1436	2673	2683	2323	2762	3288	2668	1026	2884	1797	Oxtr	6	112473683	112489943	-	4790	protein_coding	oxytocin receptor [Source:MGI Symbol;Acc:MGI:109147]	-	-
ENSMUSG00000001280	3050	2569	2397	2311	2331	1726	3235	3257	2908	3223	3085	2486	2341	1981	2755	Sp1	15	102406143	102436404	+	8262	protein_coding	trans-acting transcription factor 1 [Source:MGI Symbol;Acc:MGI:98372]	C2H2	C2H2
ENSMUSG00000021000	1799	2933	2447	2496	1816	2286	3645	3565	4129	3541	2020	2264	1920	2344	2448	Mia2	12	59095799	59191583	+	11239	protein_coding	melanoma inhibitory activity 2 [Source:MGI Symbol;Acc:MGI:2159614]	-	-
ENSMUSG00000026775	2901	2955	3237	2793	2131	1563	2591	2733	2630	2788	3204	2376	2074	2516	3139	Yme1l1	2	23156369	23199260	+	8009	protein_coding	YME1-like 1 (S. cerevisiae) [Source:MGI Symbol;Acc:MGI:1351651]	-	-
ENSMUSG00000014313	1081	2591	2023	2921	2737	3727	2647	2829	2753	2961	1146	2755	2896	3068	3399	Cox6c	15	35925886	35938246	-	3567	protein_coding	cytochrome c oxidase subunit 6C [Source:MGI Symbol;Acc:MGI:104614]	-	-
ENSMUSG00000024835	2689	2546	2437	2082	2952	3310	2702	2877	2836	2872	2487	2290	2087	2540	2810	Coro1b	19	4148619	4154035	+	2372	protein_coding	coronin, actin binding protein 1B [Source:MGI Symbol;Acc:MGI:1345963]	-	-
ENSMUSG00000019920	2474	2881	2656	2410	2151	1632	3050	3061	2953	3037	3150	2639	2188	2433	2801	Lims1	10	58323466	58424691	+	4891	protein_coding	LIM and senescent cell antigen-like domains 1 [Source:MGI Symbol;Acc:MGI:1195263]	LIM	LIM
ENSMUSG00000031701	2133	2698	2550	2675	2436	1900	2705	3078	2675	2813	2654	2608	2786	2588	3178	Dnaja2	8	85537633	85555344	-	2975	protein_coding	DnaJ heat shock protein family (Hsp40) member A2 [Source:MGI Symbol;Acc:MGI:1931882]	-	-
ENSMUSG00000001017	2078	2670	2565	2672	2623	2262	2766	2843	2758	2730	2564	2773	2502	2667	2955	Chtop	3	90498956	90509498	-	3637	protein_coding	chromatin target of PRMT1 [Source:MGI Symbol;Acc:MGI:1913761]	-	-
ENSMUSG00000032594	2593	2385	2322	2024	2594	2988	3000	2996	2917	2688	2390	2554	2538	2518	2892	Ip6k1	9	108002501	108048782	+	6487	protein_coding	inositol hexaphosphate kinase 1 [Source:MGI Symbol;Acc:MGI:1351633]	-	-
ENSMUSG00000030275	2055	2889	2215	2207	2046	2331	3355	3520	3183	3415	2732	2238	2367	2472	2331	Etnk1	6	143167221	143232307	+	14151	protein_coding	ethanolamine kinase 1 [Source:MGI Symbol;Acc:MGI:1922570]	-	-
ENSMUSG00000025860	3073	2590	2537	2378	2347	1836	2926	3064	2821	3018	2630	2441	2229	2383	2998	Xiap	X	42059679	42109656	+	9469	protein_coding	X-linked inhibitor of apoptosis [Source:MGI Symbol;Acc:MGI:107572]	-	-
ENSMUSG00000028478	2123	2932	2811	2575	2463	1919	2570	2589	2516	2607	3617	2680	2916	1906	3047	Clta	4	44004452	44032846	+	1800	protein_coding	clathrin, light polypeptide (Lca) [Source:MGI Symbol;Acc:MGI:894297]	-	-
ENSMUSG00000028557	2038	2850	2674	2481	2271	1832	3177	3158	3400	3076	2436	2393	2733	2235	2513	Rnf11	4	109451098	109484728	-	4263	protein_coding	ring finger protein 11 [Source:MGI Symbol;Acc:MGI:1352759]	-	-
ENSMUSG00000041390	1895	2548	2733	2605	3210	1746	2680	2690	2676	2801	2109	2640	2787	2568	3576	Mdfic	6	15720661	15802169	+	7427	protein_coding	MyoD family inhibitor domain containing [Source:MGI Symbol;Acc:MGI:104611]	-	-
ENSMUSG00000025085	2630	2324	2584	2052	2403	2328	3108	2349	2418	2034	3518	3032	2408	2866	3177	Ablim1	19	57032733	57314919	-	11949	protein_coding	actin-binding LIM protein 1 [Source:MGI Symbol;Acc:MGI:1194500]	LIM	LIM
ENSMUSG00000028980	5899	2934	2129	1613	2176	2121	3507	2879	2973	2869	2670	1594	1538	2034	2239	H6pd	4	149979475	150009023	-	5236	protein_coding	hexose-6-phosphate dehydrogenase (glucose 1-dehydrogenase) [Source:MGI Symbol;Acc:MGI:2140356]	-	-
ENSMUSG00000031875	2076	2208	2687	2200	3291	2863	2380	2965	2411	2985	1628	2591	2671	2703	3505	Cmtm3	8	104339410	104347672	+	2986	protein_coding	CKLF-like MARVEL transmembrane domain containing 3 [Source:MGI Symbol;Acc:MGI:2447162]	-	-
ENSMUSG00000017781	2149	3103	2563	2588	2263	2513	3198	2823	3269	2890	2475	2166	2262	2255	2646	Pitpna	11	75588097	75628804	+	4129	protein_coding	phosphatidylinositol transfer protein, alpha [Source:MGI Symbol;Acc:MGI:99887]	-	-
ENSMUSG00000030557	2078	2456	2732	2480	2571	2201	2726	3315	2988	3228	2576	2338	2507	2289	2676	Mef2a	7	67231163	67372858	-	14681	protein_coding	myocyte enhancer factor 2A [Source:MGI Symbol;Acc:MGI:99532]	MADS-M-type	MADS->MADS-M-type
ENSMUSG00000009575	2760	2720	2233	2256	2242	1730	3204	3037	2979	2857	3309	2590	2336	2154	2746	Cbx5	15	103191544	103239816	-	9006	protein_coding	chromobox 5 [Source:MGI Symbol;Acc:MGI:109372]	-	-
ENSMUSG00000062397	2245	2954	2862	2707	2347	2115	2701	2736	2767	2774	2456	2492	2782	2447	2753	Zfp706	15	36997027	37007773	-	4981	protein_coding	zinc finger protein 706 [Source:MGI Symbol;Acc:MGI:1915286]	-	-
ENSMUSG00000027351	3094	2609	2582	2175	2443	1781	2979	3366	3008	3180	2526	2258	2500	2122	2497	Spred1	2	117121374	117182279	+	6784	protein_coding	sprouty protein with EVH-1 domain 1, related sequence [Source:MGI Symbol;Acc:MGI:2150016]	-	-
ENSMUSG00000036622	1890	1718	2095	1388	3229	3745	3288	4478	3974	4017	1905	1645	1919	1450	2360	Atp13a2	4	140986873	141007330	+	6000	protein_coding	ATPase type 13A2 [Source:MGI Symbol;Acc:MGI:1922022]	-	-
ENSMUSG00000020044	2316	2344	2742	1962	2149	1208	4143	4220	4291	3726	2904	1874	1989	1196	2020	Timp3	10	86300372	86349506	+	8144	protein_coding	tissue inhibitor of metalloproteinase 3 [Source:MGI Symbol;Acc:MGI:98754]	-	-
ENSMUSG00000044791	2694	3011	2707	2443	2330	1808	2899	3170	2738	2759	2625	2535	2173	2440	2748	Setd2	9	110532597	110618633	+	10754	protein_coding	SET domain containing 2 [Source:MGI Symbol;Acc:MGI:1918177]	SET	SET
ENSMUSG00000028248	1273	2297	2200	2241	3438	3337	2470	2376	2617	2623	1237	3401	3107	3883	2545	Pnisr	4	21847583	21876475	+	10187	protein_coding	PNN interacting serine/arginine-rich [Source:MGI Symbol;Acc:MGI:1913875]	-	-
ENSMUSG00000041841	1599	2450	2429	2962	3392	3363	2454	2553	2330	2495	1685	3060	3042	2222	2965	Rpl37	15	5116645	5119140	+	1684	protein_coding	ribosomal protein L37 [Source:MGI Symbol;Acc:MGI:1914531]	-	-
ENSMUSG00000036478	2818	2491	2638	2106	3030	1896	2446	3181	2687	2692	2349	2451	2972	2306	2918	Btg1	10	96617006	96622809	+	5276	protein_coding	B cell translocation gene 1, anti-proliferative [Source:MGI Symbol;Acc:MGI:88215]	-	-
ENSMUSG00000052353	2487	3145	2397	2682	1917	633	1456	1219	2868	994	7186	3945	1050	4460	2541	Cemip	7	83932857	84086502	-	12232	protein_coding	cell migration inducing protein, hyaluronan binding [Source:MGI Symbol;Acc:MGI:2443629]	-	-
ENSMUSG00000005034	2304	2521	2647	2543	2315	1779	2857	3076	2901	2961	2691	2570	2582	2353	2859	Prkacb	3	146729574	146812990	-	8772	protein_coding	protein kinase, cAMP dependent, catalytic, beta [Source:MGI Symbol;Acc:MGI:97594]	-	-
ENSMUSG00000028405	2098	2572	2820	2233	3010	1915	2855	3522	2870	3157	2232	2462	2003	2214	2964	Aco1	4	40143081	40198338	+	4496	protein_coding	aconitase 1 [Source:MGI Symbol;Acc:MGI:87879]	-	-
ENSMUSG00000028034	1508	2976	2291	2867	3024	1786	2365	2371	2544	2623	2235	3555	2521	3447	2805	Fubp1	3	152210422	152236826	+	15500	protein_coding	far upstream element (FUSE) binding protein 1 [Source:MGI Symbol;Acc:MGI:1196294]	-	-
ENSMUSG00000042323	2606	2512	2423	2639	2526	1619	2905	2975	2659	2751	3112	2710	2336	2252	2878	Pbrm1	14	31019138	31121592	+	8846	protein_coding	polybromo 1 [Source:MGI Symbol;Acc:MGI:1923998]	HMG	HMG
ENSMUSG00000032199	2034	2989	2433	2438	1934	1559	3323	3249	3114	3059	3140	2537	2149	2209	2732	Polr2m	9	71478437	71485935	-	2424	protein_coding	polymerase (RNA) II (DNA directed) polypeptide M [Source:MGI Symbol;Acc:MGI:107282]	-	-
ENSMUSG00000027423	2158	3056	2717	2946	2400	1636	2455	2512	2414	2486	2282	2849	2951	2675	3339	Snx5	2	144250123	144270906	-	4177	protein_coding	sorting nexin 5 [Source:MGI Symbol;Acc:MGI:1916428]	-	-
ENSMUSG00000059005	2663	2518	2520	2366	2531	2204	2558	3004	2213	2781	2064	2479	2833	3033	3104	Hnrnpa3	2	75659261	75669407	+	5396	protein_coding	heterogeneous nuclear ribonucleoprotein A3 [Source:MGI Symbol;Acc:MGI:1917171]	-	-
ENSMUSG00000055850	1486	2763	2274	2531	2680	3296	3063	3405	2994	3420	1573	2243	1883	2518	2720	Rnf181	6	72359714	72366956	-	2860	protein_coding	ring finger protein 181 [Source:MGI Symbol;Acc:MGI:1913760]	-	-
ENSMUSG00000020823	1898	2503	1812	1665	1676	2992	5226	4044	3876	4135	2284	1671	1756	1417	1886	Sec14l1	11	117115168	117159268	+	7176	protein_coding	SEC14-like lipid binding 1 [Source:MGI Symbol;Acc:MGI:1921386]	-	-
ENSMUSG00000049090	1866	2453	2375	2600	2729	1516	2839	3067	2947	3006	2479	2817	2447	2284	3387	Zadh2	18	84088158	84097514	+	3321	protein_coding	zinc binding alcohol dehydrogenase, domain containing 2 [Source:MGI Symbol;Acc:MGI:2444835]	-	-
ENSMUSG00000024966	2540	3351	2945	2910	2566	2222	2132	2446	2309	2669	2525	2131	1944	2967	3131	Stip1	19	7020696	7040026	-	2173	protein_coding	stress-induced phosphoprotein 1 [Source:MGI Symbol;Acc:MGI:109130]	-	-
ENSMUSG00000039899	2042	2423	2118	1986	1871	1615	3581	3177	2564	2681	4540	2325	3201	1962	2671	Fgl2	5	21372642	21378374	+	3788	protein_coding	fibrinogen-like protein 2 [Source:MGI Symbol;Acc:MGI:103266]	-	-
ENSMUSG00000019802	2158	2538	2567	2226	2485	1933	3050	3390	2913	3109	2640	2294	2405	2201	2842	Sec63	10	42761496	42832514	+	8787	protein_coding	SEC63-like (S. cerevisiae) [Source:MGI Symbol;Acc:MGI:2155302]	-	-
ENSMUSG00000036565	3221	3097	3391	3321	2254	1676	2391	2055	2312	2116	4119	2582	1643	2324	2222	Ttyh3	5	140620578	140649031	-	5684	protein_coding	tweety family member 3 [Source:MGI Symbol;Acc:MGI:1925589]	-	-
ENSMUSG00000023224	1342	2664	2628	2287	2458	2824	3772	2505	3063	3192	2193	2376	2730	1906	2756	Serping1	2	84765387	84775444	-	2325	protein_coding	serine (or cysteine) peptidase inhibitor, clade G, member 1 [Source:MGI Symbol;Acc:MGI:894696]	-	-
ENSMUSG00000022141	2761	2518	2577	2225	2301	1646	2939	3090	2899	3103	3196	2421	2089	2480	2405	Nipbl	15	8290617	8444463	-	9423	protein_coding	NIPBL cohesin loading factor [Source:MGI Symbol;Acc:MGI:1913976]	-	-
ENSMUSG00000027931	3352	2148	1678	1489	1666	2959	4486	3953	3696	3913	2799	1643	1654	1611	1598	Npr1	3	90450591	90465866	-	4783	protein_coding	natriuretic peptide receptor 1 [Source:MGI Symbol;Acc:MGI:97371]	-	-
ENSMUSG00000029686	2033	2575	2359	2765	2406	2073	2514	2537	2686	2519	2524	2622	3084	2754	3190	Cul1	6	47453398	47526139	+	4040	protein_coding	cullin 1 [Source:MGI Symbol;Acc:MGI:1349658]	-	-
ENSMUSG00000057522	2381	2681	2656	2042	2477	2009	3246	2967	3086	2905	2757	2257	2279	2253	2642	Spop	11	95414080	95493406	+	3159	protein_coding	speckle-type POZ protein [Source:MGI Symbol;Acc:MGI:1343085]	-	-
ENSMUSG00000033307	1971	3000	2462	3092	3244	2761	1837	1967	2105	1738	1713	2560	3009	3568	3592	Mif	10	75859353	75860240	-	745	protein_coding	macrophage migration inhibitory factor (glycosylation-inhibiting factor) [Source:MGI Symbol;Acc:MGI:96982]	-	-
ENSMUSG00000021140	3205	2134	2314	1884	2371	1677	3256	3488	3010	3157	3263	2265	2004	1926	2604	Pcnx	12	81860023	82000924	+	15613	protein_coding	pecanex homolog [Source:MGI Symbol;Acc:MGI:1891924]	-	-
ENSMUSG00000022255	1851	2968	2767	2898	2170	1714	2974	2746	2744	2761	2518	2504	2667	2360	2909	Mtdh	15	34082694	34145624	+	15347	protein_coding	metadherin [Source:MGI Symbol;Acc:MGI:1914404]	-	-
ENSMUSG00000020114	2571	2603	2476	2520	2165	1404	2699	2970	2641	2710	3610	2589	2173	2278	3126	Cand1	10	119199255	119240055	-	8357	protein_coding	cullin associated and neddylation disassociated 1 [Source:MGI Symbol;Acc:MGI:1261820]	-	-
ENSMUSG00000073676	1622	3325	2468	3298	2926	2715	2525	2581	2581	2598	1248	2279	2582	2573	3192	Hspe1	1	55088132	55091307	+	1474	protein_coding	heat shock protein 1 (chaperonin 10) [Source:MGI Symbol;Acc:MGI:104680]	-	-
ENSMUSG00000020198	3209	2464	2439	2151	2354	2490	2792	2976	2832	2719	3050	2297	1951	2370	2418	Ap3d1	10	80706956	80742264	-	8914	protein_coding	adaptor-related protein complex 3, delta 1 subunit [Source:MGI Symbol;Acc:MGI:107734]	-	-
ENSMUSG00000021133	1993	2247	2314	2128	2368	2133	3469	3620	3425	3402	2474	2305	1969	1999	2660	Susd6	12	80790510	80880835	+	7615	protein_coding	sushi domain containing 6 [Source:MGI Symbol;Acc:MGI:2444661]	-	-
ENSMUSG00000022098	1831	2257	2518	1785	3422	3278	2809	2856	3166	2779	1762	2188	2323	2779	2751	Bmp1	14	70474558	70520234	-	8870	protein_coding	bone morphogenetic protein 1 [Source:MGI Symbol;Acc:MGI:88176]	-	-
ENSMUSG00000024083	2293	2617	2384	2272	2170	1423	3247	3743	3193	3262	3139	2167	2410	1500	2682	Pja2	17	64281005	64331916	-	6657	protein_coding	praja ring finger ubiquitin ligase 2 [Source:MGI Symbol;Acc:MGI:2159342]	-	-
ENSMUSG00000029090	1811	2302	2336	2175	2614	2345	3053	3517	3396	3613	2276	2081	1817	2046	3119	Adgra3	5	49959956	50059006	-	8113	protein_coding	adhesion G protein-coupled receptor A3 [Source:MGI Symbol;Acc:MGI:1917943]	-	-
ENSMUSG00000029426	2249	2217	2414	1850	2189	1812	3640	3617	3048	3331	4346	2147	2227	1319	2090	Scarb2	5	92441314	92506833	-	6285	protein_coding	scavenger receptor class B, member 2 [Source:MGI Symbol;Acc:MGI:1196458]	-	-
ENSMUSG00000062014	2966	2884	2669	2302	2010	1448	2962	2861	2757	2994	2828	2508	2119	2430	2740	Gmfb	14	46808149	46822242	-	6844	protein_coding	glia maturation factor, beta [Source:MGI Symbol;Acc:MGI:1927133]	-	-
ENSMUSG00000020257	2277	2976	2564	2553	2483	1902	2773	2750	2780	2693	2958	2507	2141	2310	2779	Wdr82	9	106170928	106191139	+	6341	protein_coding	WD repeat domain containing 82 [Source:MGI Symbol;Acc:MGI:1924555]	-	-
ENSMUSG00000021969	3447	2440	2944	2525	2345	1917	2423	2527	2238	2469	2702	2479	2712	2742	2489	Zdhhc20	14	57832703	57890276	-	7213	protein_coding	zinc finger, DHHC domain containing 20 [Source:MGI Symbol;Acc:MGI:1923215]	-	-
ENSMUSG00000028657	1484	2407	2462	2308	2531	1807	2748	3649	3122	3446	2167	2738	2194	2436	2846	Ppt1	4	122836242	122859175	+	3674	protein_coding	palmitoyl-protein thioesterase 1 [Source:MGI Symbol;Acc:MGI:1298204]	-	-
ENSMUSG00000008348	1861	2568	2177	2584	2935	3569	2407	3156	2689	2678	1346	2462	2513	2559	2841	Ubc	5	125385965	125390202	-	2893	protein_coding	ubiquitin C [Source:MGI Symbol;Acc:MGI:98889]	-	-
ENSMUSG00000061136	2345	2734	2787	2898	2277	1346	2588	2927	2771	2852	2742	2565	2307	2238	2951	Prpf40a	2	53134704	53191284	-	10458	protein_coding	pre-mRNA processing factor 40A [Source:MGI Symbol;Acc:MGI:1860512]	-	-
ENSMUSG00000031808	2368	1855	2294	2075	3248	3184	2689	2963	2525	2813	2616	2207	2519	2420	2540	Slc27a1	8	71568882	71587302	+	5835	protein_coding	solute carrier family 27 (fatty acid transporter), member 1 [Source:MGI Symbol;Acc:MGI:1347098]	-	-
ENSMUSG00000051727	1584	1779	1441	2391	1465	2541	1988	2054	2262	1887	4028	2979	2942	3626	5303	Kctd14	7	97451323	97459557	+	2568	protein_coding	potassium channel tetramerisation domain containing 14 [Source:MGI Symbol;Acc:MGI:1289222]	-	-
ENSMUSG00000079523	2611	2256	2716	2433	4205	3175	1660	1714	2039	1874	2439	3135	2606	2668	2725	Tmsb10	6	72957347	72958748	-	1276	protein_coding	thymosin, beta 10 [Source:MGI Symbol;Acc:MGI:109146]	-	-
ENSMUSG00000033392	2733	2178	2661	2000	2577	1931	3252	3238	3573	3088	2785	2024	2163	1753	2267	Clasp2	9	113741473	113919682	+	15378	protein_coding	CLIP associating protein 2 [Source:MGI Symbol;Acc:MGI:1923749]	-	-
ENSMUSG00000003345	2689	2125	2599	2202	2964	2827	2804	2764	2585	2511	2972	2297	2122	2140	2603	Csnk1g2	10	80622838	80640749	+	4835	protein_coding	casein kinase 1, gamma 2 [Source:MGI Symbol;Acc:MGI:1920014]	-	-
ENSMUSG00000026678	2212	2642	3249	2438	2518	1413	3029	2152	3568	2658	2008	2721	2918	2016	2660	Rgs5	1	169655501	169695813	+	4546	protein_coding	regulator of G-protein signaling 5 [Source:MGI Symbol;Acc:MGI:1098434]	-	-
ENSMUSG00000007670	3583	2387	2624	1980	2730	2131	2568	2808	2542	2485	3287	2289	2074	2168	2534	Khsrp	17	57021051	57031522	-	4319	protein_coding	KH-type splicing regulatory protein [Source:MGI Symbol;Acc:MGI:1336214]	-	-
ENSMUSG00000019777	1838	2740	2748	2831	2556	2055	2027	2414	2278	2486	2305	2936	2504	3073	3382	Hdac2	10	36974544	37001889	+	4474	protein_coding	histone deacetylase 2 [Source:MGI Symbol;Acc:MGI:1097691]	-	-
ENSMUSG00000046718	1165	2570	2754	3013	4016	3311	2487	2259	2859	2366	1437	2495	2897	2254	2281	Bst2	8	71534255	71537456	-	903	protein_coding	bone marrow stromal cell antigen 2 [Source:MGI Symbol;Acc:MGI:1916800]	-	-
ENSMUSG00000019907	2117	2880	2767	2322	2597	1816	2576	2474	2506	2497	2977	2519	2841	2593	2654	Ppp1r12a	10	108162193	108284475	+	8020	protein_coding	protein phosphatase 1, regulatory subunit 12A [Source:MGI Symbol;Acc:MGI:1309528]	-	-
ENSMUSG00000026353	2071	2705	2873	3202	2108	2168	2441	2647	2615	2571	2650	2612	2312	2454	2648	Ubxn4	1	128243964	128279378	+	4659	protein_coding	UBX domain protein 4 [Source:MGI Symbol;Acc:MGI:1915062]	-	-
ENSMUSG00000022752	2217	2919	2807	2930	2406	1563	2576	2565	2549	2578	2786	2507	2544	2476	2637	Tomm70a	16	57121703	57156705	+	9777	protein_coding	translocase of outer mitochondrial membrane 70A [Source:MGI Symbol;Acc:MGI:106295]	-	-
ENSMUSG00000031309	2279	2571	2657	2414	2357	1455	2839	3147	2928	2985	2948	2528	2098	2057	2787	Rps6ka3	X	159210307	159368244	+	8322	protein_coding	ribosomal protein S6 kinase polypeptide 3 [Source:MGI Symbol;Acc:MGI:104557]	-	-
ENSMUSG00000024248	1344	2168	2730	2215	2640	2013	2797	2652	2494	2597	3038	2846	2969	2251	3288	Cox7a2l	17	83501919	83514333	-	1147	protein_coding	cytochrome c oxidase subunit 7A2 like [Source:MGI Symbol;Acc:MGI:106015]	-	-
ENSMUSG00000025234	2658	2626	2452	2456	2155	1518	2933	2904	2974	2817	3007	2392	2402	2130	2609	Arih1	9	59388258	59486618	-	7707	protein_coding	ariadne RBR E3 ubiquitin protein ligase 1 [Source:MGI Symbol;Acc:MGI:1344363]	-	-
ENSMUSG00000062762	2785	2708	2443	2071	2142	2805	3246	2894	3095	3125	1995	2133	1928	2205	2452	Ei24	9	36779159	36797393	-	4868	protein_coding	etoposide induced 2.4 mRNA [Source:MGI Symbol;Acc:MGI:108090]	-	-
ENSMUSG00000029505	2920	2428	2248	2177	2410	1764	2778	2984	2868	2870	3215	2509	2176	2136	2535	Ep400	5	110664373	110770717	-	13971	protein_coding	E1A binding protein p400 [Source:MGI Symbol;Acc:MGI:1276124]	SNF2	SNF2
ENSMUSG00000024614	1866	2421	2775	2295	2818	1687	2494	3146	2777	3112	2000	2574	2530	2411	3062	Tmx3	18	90510154	90543267	+	4611	protein_coding	thioredoxin-related transmembrane protein 3 [Source:MGI Symbol;Acc:MGI:2442418]	-	-
ENSMUSG00000020715	1242	1665	1687	1596	1919	2252	4599	4874	3909	4518	2029	1838	1990	1445	2350	Ern1	11	106394650	106487852	-	8173	protein_coding	endoplasmic reticulum (ER) to nucleus signalling 1 [Source:MGI Symbol;Acc:MGI:1930134]	-	-
ENSMUSG00000031871	2928	2486	2208	2016	2238	2386	3074	3155	3248	3446	1801	2489	2043	2035	2359	Cdh5	8	104101625	104144511	+	4203	protein_coding	cadherin 5 [Source:MGI Symbol;Acc:MGI:105057]	-	-
ENSMUSG00000022390	2274	1894	2408	2082	2534	2016	3047	3167	2930	2645	4096	2399	1791	2023	2579	Zc3h7b	15	81745057	81796260	+	10045	protein_coding	zinc finger CCCH type containing 7B [Source:MGI Symbol;Acc:MGI:1328310]	C2H2	C2H2
ENSMUSG00000024283	2115	2707	2560	2356	2414	1777	2619	2848	2677	2679	2421	2448	2562	2598	3101	Wac	18	7868832	7973547	+	5962	protein_coding	WW domain containing adaptor with coiled-coil [Source:MGI Symbol;Acc:MGI:2387357]	-	-
ENSMUSG00000029030	2302	2725	2907	2253	2567	2665	2773	2837	2749	3093	2076	2016	2443	2002	2469	Tprgl	4	154157485	154160666	-	2242	protein_coding	transformation related protein 63 regulated like [Source:MGI Symbol;Acc:MGI:1915058]	-	-
ENSMUSG00000034297	2999	2260	2719	2283	2402	1272	2687	3015	2894	2949	3115	2517	1937	2185	2588	Med13	11	86267033	86357602	-	10840	protein_coding	mediator complex subunit 13 [Source:MGI Symbol;Acc:MGI:3029632]	-	-
ENSMUSG00000000149	3092	2345	2670	2363	2459	2103	2785	2697	2660	2547	3171	2175	2086	2147	2493	Gna12	5	140758408	140830431	-	3416	protein_coding	guanine nucleotide binding protein, alpha 12 [Source:MGI Symbol;Acc:MGI:95767]	-	-
ENSMUSG00000053110	2395	2312	2258	2226	2301	1879	2877	2904	2675	2684	3218	2317	2733	2350	2661	Yap1	9	7931999	8004596	-	9257	protein_coding	yes-associated protein 1 [Source:MGI Symbol;Acc:MGI:103262]	-	-
ENSMUSG00000026687	2206	2945	2285	2313	2320	2231	2814	3105	2929	3351	2087	1995	2138	2282	2785	Aldh9a1	1	167349991	167368532	+	3383	protein_coding	aldehyde dehydrogenase 9, subfamily A1 [Source:MGI Symbol;Acc:MGI:1861622]	-	-
ENSMUSG00000039515	2367	2370	2549	2181	2852	2427	2718	2650	2821	2606	3177	2314	1956	2134	2642	Ptpa	2	30416039	30447806	+	5188	protein_coding	protein phosphatase 2 protein activator [Source:MGI Symbol;Acc:MGI:1346006]	-	-
ENSMUSG00000004771	1625	2644	2755	2389	2586	2448	2484	2807	2689	3023	1753	2437	2948	2310	2850	Rab11a	9	64715299	64737758	-	2992	protein_coding	RAB11A, member RAS oncogene family [Source:MGI Symbol;Acc:MGI:1858202]	-	-
ENSMUSG00000027109	2057	2700	2778	2706	2321	1798	2646	2609	2646	2777	2239	2437	2757	2414	2833	Sp3	2	72936427	72980446	-	4933	protein_coding	trans-acting transcription factor 3 [Source:MGI Symbol;Acc:MGI:1277166]	C2H2	C2H2
ENSMUSG00000021540	2447	2302	2476	2046	2238	1679	3118	2772	3150	2833	3742	2299	2207	1821	2566	Smad5	13	56703010	56742377	+	7420	protein_coding	SMAD family member 5 [Source:MGI Symbol;Acc:MGI:1328787]	-	-
ENSMUSG00000058013	2976	3148	2670	3140	2318	1302	2189	2075	2219	2014	2981	2891	2340	2465	2884	2023-09-11	5	93093437	93176447	+	9472	protein_coding	septin 11 [Source:MGI Symbol;Acc:MGI:1277214]	-	-
ENSMUSG00000052707	3014	2367	2402	2328	2430	2624	2394	2308	2486	2445	2343	2504	2649	2921	2395	Tnrc6a	7	123123885	123195296	+	12706	protein_coding	trinucleotide repeat containing 6a [Source:MGI Symbol;Acc:MGI:2385292]	-	-
ENSMUSG00000028423	2336	2288	1920	1997	1956	2953	3560	3611	2848	3622	1898	2068	1827	2356	2364	Nfx1	4	40970906	41025993	+	8564	protein_coding	nuclear transcription factor, X-box binding 1 [Source:MGI Symbol;Acc:MGI:1921414]	NF-X1	NF-X1
ENSMUSG00000022551	1544	2496	2319	2181	3163	3190	2538	3317	2982	3268	1531	2239	2004	2171	2633	Cyc1	15	76343523	76346260	+	2154	protein_coding	cytochrome c-1 [Source:MGI Symbol;Acc:MGI:1913695]	-	-
ENSMUSG00000025410	1810	2312	2199	2033	2872	3105	2592	2957	2713	2732	2109	2409	2209	2686	2817	Dctn2	10	127266368	127281950	+	4795	protein_coding	dynactin 2 [Source:MGI Symbol;Acc:MGI:107733]	-	-
ENSMUSG00000016528	2100	2314	2482	2432	2625	2119	2909	2900	2748	2919	2845	2155	2326	1939	2710	Mapkapk2	1	131053700	131097826	-	3041	protein_coding	MAP kinase-activated protein kinase 2 [Source:MGI Symbol;Acc:MGI:109298]	-	-
ENSMUSG00000060657	3430	2162	2606	1898	1816	2224	2960	2708	3110	2921	3685	1881	1781	2091	2203	Marf1	16	14109173	14163351	-	10153	protein_coding	meiosis regulator and mRNA stability 1 [Source:MGI Symbol;Acc:MGI:2444505]	-	-
ENSMUSG00000005469	1728	3223	2317	2632	2010	2697	2980	2914	3365	3050	1971	2112	1651	2388	2437	Prkaca	8	83972993	83996443	+	2488	protein_coding	protein kinase, cAMP dependent, catalytic, alpha [Source:MGI Symbol;Acc:MGI:97592]	-	-
ENSMUSG00000041870	2394	2464	2812	2175	2896	2160	2791	3202	2783	3140	2259	2007	2034	1998	2345	Ankrd13a	5	114774677	114806200	+	5983	protein_coding	ankyrin repeat domain 13a [Source:MGI Symbol;Acc:MGI:1915670]	-	-
ENSMUSG00000093904	1932	2404	2373	2334	2290	1616	3262	3520	2731	3010	2353	2356	2535	1919	2819	Tomm20	8	126930667	126945844	-	4906	protein_coding	translocase of outer mitochondrial membrane 20 [Source:MGI Symbol;Acc:MGI:1915202]	-	-
ENSMUSG00000030016	2511	2727	2888	2416	2173	1685	2385	2238	2354	2615	2633	2706	2611	2832	2669	Zfp638	6	83867109	83989550	+	15810	protein_coding	zinc finger protein 638 [Source:MGI Symbol;Acc:MGI:1203484]	-	-
ENSMUSG00000024002	2868	2811	2512	2185	2488	2028	2492	2581	2729	2371	2596	2398	2348	2379	2646	Brd4	17	32196274	32284722	-	9083	protein_coding	bromodomain containing 4 [Source:MGI Symbol;Acc:MGI:1888520]	-	-
ENSMUSG00000053846	586	1862	1547	2975	2721	1901	4690	3231	5428	3505	3731	2931	693	1165	461	Lipg	18	74939322	74961263	-	3787	protein_coding	lipase, endothelial [Source:MGI Symbol;Acc:MGI:1341803]	-	-
ENSMUSG00000020900	2495	2454	2295	2123	2502	1589	3030	2741	2616	2341	3882	2435	2030	1985	2906	Myh10	11	68691559	68816632	+	10458	protein_coding	myosin, heavy polypeptide 10, non-muscle [Source:MGI Symbol;Acc:MGI:1930780]	-	-
ENSMUSG00000037470	3328	2924	2438	2367	2596	1732	2485	2403	2321	2511	2642	2376	1937	2433	2919	Uggt1	1	36140027	36244720	-	12853	protein_coding	UDP-glucose glycoprotein glucosyltransferase 1 [Source:MGI Symbol;Acc:MGI:2443162]	-	-
ENSMUSG00000041355	1947	2720	2532	2556	3153	2997	2272	2560	2362	2520	1624	2574	2095	2589	2897	Ssr2	3	88575876	88588419	+	1864	protein_coding	signal sequence receptor, beta [Source:MGI Symbol;Acc:MGI:1913506]	-	-
ENSMUSG00000032604	2594	2677	2427	2162	2233	2128	2640	2686	2807	2750	2635	2254	2076	2309	3008	Qars	9	108507706	108515941	+	6572	protein_coding	glutaminyl-tRNA synthetase [Source:MGI Symbol;Acc:MGI:1915851]	-	-
ENSMUSG00000000711	2381	2549	2376	2082	2348	2039	3183	3404	3127	3186	2200	2292	1843	2052	2317	Rab5b	10	128677175	128696264	-	4201	protein_coding	RAB5B, member RAS oncogene family [Source:MGI Symbol;Acc:MGI:105938]	-	-
ENSMUSG00000045312	2284	2499	3056	2308	3124	1415	2230	2682	2687	2100	2474	2572	2427	2282	3228	Lhfpl2	13	94057796	94195409	+	8415	protein_coding	lipoma HMGIC fusion partner-like 2 [Source:MGI Symbol;Acc:MGI:2145236]	-	-
ENSMUSG00000016494	2534	2526	2524	1812	2256	2525	3173	3057	2715	2945	2057	1941	2139	2429	2734	Cd34	1	194938819	194961279	+	7290	protein_coding	CD34 antigen [Source:MGI Symbol;Acc:MGI:88329]	-	-
ENSMUSG00000016541	2016	2630	3053	2695	2840	1346	1822	2113	2199	1983	2810	2748	3038	2613	3445	Atxn10	15	85336245	85463212	+	1937	protein_coding	ataxin 10 [Source:MGI Symbol;Acc:MGI:1859293]	-	-
ENSMUSG00000022858	1621	2935	2137	2482	2482	2191	2317	2589	2309	2575	2061	2435	2815	3009	3380	Tra2b	16	22244549	22266005	-	9235	protein_coding	transformer 2 beta [Source:MGI Symbol;Acc:MGI:106016]	-	-
ENSMUSG00000040451	1860	3073	2122	1976	2193	1603	3491	2969	4162	2615	2129	1961	2098	2445	2635	Sgms1	19	32122727	32389714	-	10299	protein_coding	sphingomyelin synthase 1 [Source:MGI Symbol;Acc:MGI:2444110]	-	-
ENSMUSG00000040407	3014	2441	2240	1823	2051	1917	3103	3563	2919	3425	3048	2077	1656	1848	2185	Akap9	5	3928054	4081310	+	21350	protein_coding	A kinase (PRKA) anchor protein (yotiao) 9 [Source:MGI Symbol;Acc:MGI:2178217]	-	-
ENSMUSG00000029070	1244	2468	1545	1219	2024	2677	4627	3691	4712	3598	1658	1506	2048	1836	2456	Mxra8	4	155839680	155844088	+	2918	protein_coding	matrix-remodelling associated 8 [Source:MGI Symbol;Acc:MGI:1922011]	-	-
ENSMUSG00000019804	1665	3017	2400	2761	2450	2721	2491	2659	2581	2745	1674	2231	2533	2433	2911	Snx3	10	42502030	42535381	+	1413	protein_coding	sorting nexin 3 [Source:MGI Symbol;Acc:MGI:1860188]	-	-
ENSMUSG00000053929	2310	2206	2420	2158	2456	2697	2924	3094	2776	2981	2464	2255	2116	2014	2401	Cyhr1	15	76643395	76660117	-	8470	protein_coding	cysteine and histidine rich 1 [Source:MGI Symbol;Acc:MGI:1859320]	-	-
ENSMUSG00000021096	2503	2709	2409	2163	2285	1856	2862	2833	2860	2812	2795	2209	2270	2161	2513	Ppm1a	12	72757455	72799819	+	12829	protein_coding	protein phosphatase 1A, magnesium dependent, alpha isoform [Source:MGI Symbol;Acc:MGI:99878]	-	-
ENSMUSG00000032038	1903	2152	2433	2677	4751	1428	2237	2507	2319	2192	1711	2237	1914	2400	4352	St3gal4	9	35046576	35119268	-	2923	protein_coding	ST3 beta-galactoside alpha-2,3-sialyltransferase 4 [Source:MGI Symbol;Acc:MGI:1316743]	-	-
ENSMUSG00000032336	1535	2695	2437	2255	2367	2058	2995	2816	2933	2789	2103	2181	2883	2509	2652	Nptn	9	58582240	58657955	+	6168	protein_coding	neuroplastin [Source:MGI Symbol;Acc:MGI:108077]	-	-
ENSMUSG00000030779	2261	2533	2466	2367	2698	2436	2196	2277	2376	2454	2136	2814	2595	2994	2592	Rbbp6	7	122965686	123002557	+	12915	protein_coding	retinoblastoma binding protein 6, ubiquitin ligase [Source:MGI Symbol;Acc:MGI:894835]	-	-
ENSMUSG00000009907	2223	2406	2614	2421	2276	1623	2572	2897	2750	2858	2575	2384	2490	2312	2781	Vps4b	1	106764071	106796728	-	8905	protein_coding	vacuolar protein sorting 4B [Source:MGI Symbol;Acc:MGI:1100499]	-	-
ENSMUSG00000021072	1908	2753	2754	2636	1985	1592	2911	2796	2830	2806	2615	2454	1961	2422	2734	Tmx1	12	70453095	70468040	+	3299	protein_coding	thioredoxin-related transmembrane protein 1 [Source:MGI Symbol;Acc:MGI:1919986]	-	-
ENSMUSG00000036333	2777	2431	2442	1856	2384	1845	3047	2948	3127	2815	2807	2246	2052	2174	2175	Kidins220	12	24974925	25063152	+	8669	protein_coding	kinase D-interacting substrate 220 [Source:MGI Symbol;Acc:MGI:1924730]	-	-
ENSMUSG00000073987	1529	2579	1772	1198	1546	3826	3612	4397	3793	4819	911	1302	1684	1744	2411	Ggh	4	20042052	20066750	+	1965	protein_coding	gamma-glutamyl hydrolase [Source:MGI Symbol;Acc:MGI:1329035]	-	-
ENSMUSG00000109324	1796	2812	2597	2954	3008	2294	1934	2465	2048	2257	2005	2528	2604	2608	3167	Prmt1	7	44975989	44986568	-	3425	protein_coding	protein arginine N-methyltransferase 1 [Source:MGI Symbol;Acc:MGI:107846]	-	-
ENSMUSG00000021690	2746	2150	2556	2398	2416	1276	2512	2626	2637	2478	3144	2514	2513	2289	2821	Jmy	13	93430101	93499808	-	8858	protein_coding	junction-mediating and regulatory protein [Source:MGI Symbol;Acc:MGI:1913096]	-	-
ENSMUSG00000074698	2698	2554	2711	2164	2259	1785	2331	2531	2640	2695	3425	2180	2094	2521	2454	Csnk2a1	2	152226839	152281852	+	7089	protein_coding	casein kinase 2, alpha 1 polypeptide [Source:MGI Symbol;Acc:MGI:88543]	-	-
ENSMUSG00000029152	1324	2867	2231	2611	2693	2278	2674	2505	2480	2490	1776	2451	2620	2940	3086	Ociad1	5	73292784	73314069	+	5515	protein_coding	OCIA domain containing 1 [Source:MGI Symbol;Acc:MGI:1915345]	-	-
ENSMUSG00000033684	2078	2055	1947	1368	3104	2353	3155	3993	3157	3576	2094	1928	1714	1689	2756	Qsox1	1	155776029	155812889	-	8291	protein_coding	quiescin Q6 sulfhydryl oxidase 1 [Source:MGI Symbol;Acc:MGI:1330818]	-	-
ENSMUSG00000016256	2286	2452	2652	2227	2697	2726	2661	2496	2713	2387	1854	2307	2033	2524	2901	Ctsz	2	174427493	174439039	-	1441	protein_coding	cathepsin Z [Source:MGI Symbol;Acc:MGI:1891190]	-	-
ENSMUSG00000062300	2362	2684	2082	2207	1842	2720	3468	3993	3443	3522	1587	1764	1322	2010	1906	Nectin2	7	19716644	19750483	-	3494	protein_coding	nectin cell adhesion molecule 2 [Source:MGI Symbol;Acc:MGI:97822]	-	-
ENSMUSG00000030451	2328	2111	1828	1892	2194	2050	3543	3565	3278	3306	3151	2027	1689	1744	2191	Herc2	7	56050196	56231800	+	16175	protein_coding	HECT and RLD domain containing E3 ubiquitin protein ligase 2 [Source:MGI Symbol;Acc:MGI:103234]	-	-
ENSMUSG00000021486	2367	2808	2609	2608	2724	2382	2251	2157	2203	2151	2193	2155	2669	2703	2914	Prelid1	13	55320500	55325272	+	2726	protein_coding	PRELI domain containing 1 [Source:MGI Symbol;Acc:MGI:1913744]	-	-
ENSMUSG00000000901	1755	2839	2631	2356	3760	1807	1974	1438	2591	1261	2102	3422	2646	2895	3403	Mmp11	10	75923222	75936496	-	2778	protein_coding	matrix metallopeptidase 11 [Source:MGI Symbol;Acc:MGI:97008]	-	-
ENSMUSG00000031980	1685	2098	1936	2254	1546	3190	4090	3452	2474	3914	1811	2391	1870	1769	2383	Agt	8	124556534	124569706	-	1891	protein_coding	angiotensinogen (serpin peptidase inhibitor, clade A, member 8) [Source:MGI Symbol;Acc:MGI:87963]	-	-
ENSMUSG00000041702	2735	2352	2392	2205	1997	1581	2959	2852	2989	2864	3155	2295	2179	2025	2265	Btbd7	12	102780797	102878471	-	16456	protein_coding	BTB (POZ) domain containing 7 [Source:MGI Symbol;Acc:MGI:1917858]	-	-
ENSMUSG00000037820	2477	2417	3573	2687	2557	2155	3202	2463	2412	2790	2745	1767	2256	1282	2059	Tgm2	2	158116402	158146436	-	4608	protein_coding	transglutaminase 2, C polypeptide [Source:MGI Symbol;Acc:MGI:98731]	-	-
ENSMUSG00000021670	1175	2896	1844	3704	1874	1908	2952	3936	2932	3687	2476	2182	1351	2368	1549	Hmgcr	13	96648967	96670936	-	7275	protein_coding	3-hydroxy-3-methylglutaryl-Coenzyme A reductase [Source:MGI Symbol;Acc:MGI:96159]	-	-
ENSMUSG00000034341	1963	2528	2290	2305	2804	2836	2398	3061	2703	2748	2040	2240	2055	2430	2378	Wbp2	11	116078573	116086995	-	3177	protein_coding	WW domain binding protein 2 [Source:MGI Symbol;Acc:MGI:104709]	-	-
ENSMUSG00000046841	2154	2922	2662	1976	3064	1427	2029	2050	2301	2087	3998	2409	2735	2171	2792	Ckap4	10	84526305	84534062	-	3089	protein_coding	cytoskeleton-associated protein 4 [Source:MGI Symbol;Acc:MGI:2444926]	-	-
ENSMUSG00000028559	2251	2800	2461	2227	2349	2268	2629	2689	2417	2782	2021	2094	2396	2595	2797	Osbpl9	4	109061145	109202272	-	7006	protein_coding	oxysterol binding protein-like 9 [Source:MGI Symbol;Acc:MGI:1923784]	-	-
ENSMUSG00000066568	1844	2468	2196	2406	2734	1778	2661	2880	2589	2667	2061	2406	2792	2268	3022	Lsm14a	7	34344646	34393315	-	6136	protein_coding	LSM14A mRNA processing body assembly factor [Source:MGI Symbol;Acc:MGI:1914320]	-	-
ENSMUSG00000026837	2797	3019	2423	1825	2683	2298	2912	2223	2841	2164	2176	2074	2525	2315	2439	Col5a1	2	27886425	28039514	+	8490	protein_coding	collagen, type V, alpha 1 [Source:MGI Symbol;Acc:MGI:88457]	-	-
ENSMUSG00000042613	2844	2233	2482	1852	2559	2010	3021	2466	2334	2325	3652	2011	2499	1834	2540	Pbxip1	3	89436706	89450952	+	4674	protein_coding	pre B cell leukemia transcription factor interacting protein 1 [Source:MGI Symbol;Acc:MGI:2441670]	-	-
ENSMUSG00000022890	1318	2515	2044	2434	3039	3386	2337	2860	2466	2715	1185	2464	2240	2622	3035	Atp5j	16	84827866	84835625	-	3130	protein_coding	ATP synthase, H+ transporting, mitochondrial F0 complex, subunit F [Source:MGI Symbol;Acc:MGI:107777]	-	-
ENSMUSG00000026496	2150	2361	2295	2260	2461	1774	2160	2752	2610	2415	2756	2829	2143	2514	3122	Parp1	1	180568924	180601254	+	5293	protein_coding	poly (ADP-ribose) polymerase family, member 1 [Source:MGI Symbol;Acc:MGI:1340806]	-	-
ENSMUSG00000041959	2256	2979	2275	2306	2385	3325	2163	2165	2613	2497	1493	2129	2160	2988	2844	S100a10	3	93555080	93564643	+	1212	protein_coding	S100 calcium binding protein A10 (calpactin) [Source:MGI Symbol;Acc:MGI:1339468]	-	-
ENSMUSG00000005981	1838	2478	2359	2344	2328	2339	2691	3003	2909	2942	2076	2313	1920	2303	2719	Trap1	16	4039971	4077827	-	2573	protein_coding	TNF receptor-associated protein 1 [Source:MGI Symbol;Acc:MGI:1915265]	-	-
ENSMUSG00000053754	2940	2161	2406	2124	2267	2261	2480	2747	2533	2755	2831	2166	1993	2226	2641	Chd8	14	52198151	52257780	-	16523	protein_coding	chromodomain helicase DNA binding protein 8 [Source:MGI Symbol;Acc:MGI:1915022]	SNF2	SNF2
ENSMUSG00000029621	2102	2688	2469	2197	2270	2508	2623	2619	2644	2723	2053	2161	2531	2260	2681	Arpc1a	5	145083830	145108761	+	2567	protein_coding	actin related protein 2/3 complex, subunit 1A [Source:MGI Symbol;Acc:MGI:1928896]	-	-
ENSMUSG00000030120	1570	2377	2137	2090	2667	2229	2926	3287	2882	3046	2152	2303	2185	2118	2537	Mlf2	6	124931386	124937238	+	4106	protein_coding	myeloid leukemia factor 2 [Source:MGI Symbol;Acc:MGI:1353554]	-	-
ENSMUSG00000062203	1961	2804	2620	2498	1761	1157	3006	3206	3033	3195	2774	2132	1741	1874	2711	Gspt1	16	11219292	11254325	-	5428	protein_coding	G1 to S phase transition 1 [Source:MGI Symbol;Acc:MGI:1316728]	-	-
ENSMUSG00000038845	2315	3193	2654	2424	2367	2597	2192	2352	2346	2379	2030	2059	2207	2668	2679	Phb	11	95666957	95680773	+	2805	protein_coding	prohibitin [Source:MGI Symbol;Acc:MGI:97572]	-	-
ENSMUSG00000021238	2716	2364	2394	1971	1779	2177	2916	3061	2935	3053	2189	2036	2223	2135	2501	Aldh6a1	12	84430717	84451004	-	5784	protein_coding	aldehyde dehydrogenase family 6, subfamily A1 [Source:MGI Symbol;Acc:MGI:1915077]	-	-
ENSMUSG00000031785	1873	1790	2469	2462	4538	1656	2059	2103	1812	1932	2709	2370	2014	2499	4163	Adgrg1	8	94974751	95014217	+	5421	protein_coding	adhesion G protein-coupled receptor G1 [Source:MGI Symbol;Acc:MGI:1340051]	-	-
ENSMUSG00000032350	1419	1490	2304	1775	2335	2844	2561	4329	3022	4084	1884	1857	2803	1583	2151	Gclc	9	77754535	77794485	+	3766	protein_coding	glutamate-cysteine ligase, catalytic subunit [Source:MGI Symbol;Acc:MGI:104990]	-	-
ENSMUSG00000020220	3005	2094	1921	1702	2006	1915	3171	3058	3238	3013	3255	2206	1732	1899	2209	Vps13d	4	144972622	145195005	-	24771	protein_coding	vacuolar protein sorting 13D [Source:MGI Symbol;Acc:MGI:2448530]	-	-
ENSMUSG00000024097	1415	2816	2019	2551	2424	2536	1815	2181	1994	2376	1296	2978	3260	3347	3391	Srsf7	17	80200089	80207305	-	2279	protein_coding	serine/arginine-rich splicing factor 7 [Source:MGI Symbol;Acc:MGI:1926232]	-	-
ENSMUSG00000037822	1875	2197	2297	1994	2379	1789	2615	2496	2323	2426	2994	2560	3309	2153	2981	Smim14	5	65446844	65537184	-	15976	protein_coding	small integral membrane protein 14 [Source:MGI Symbol;Acc:MGI:1915802]	-	-
ENSMUSG00000027170	1831	2430	2644	2599	2285	1813	2339	2258	2055	2244	2460	2584	2787	2588	3468	Eif3m	2	104999656	105017080	-	2590	protein_coding	eukaryotic translation initiation factor 3, subunit M [Source:MGI Symbol;Acc:MGI:1351744]	-	-
ENSMUSG00000022781	1956	2608	2511	2475	2169	1520	2814	2957	2987	2787	2678	2381	2211	1986	2310	Pak2	16	32016290	32079342	-	6795	protein_coding	p21 (RAC1) activated kinase 2 [Source:MGI Symbol;Acc:MGI:1339984]	-	-
ENSMUSG00000032300	2167	1975	2156	1693	1895	2457	3665	3503	3753	3493	2824	1569	1873	1527	1781	1700017B05Rik	9	57253117	57262612	-	5235	protein_coding	RIKEN cDNA 1700017B05 gene [Source:MGI Symbol;Acc:MGI:1921461]	-	-
ENSMUSG00000060992	1994	2788	2814	2463	2257	2252	2223	2512	2281	2577	2350	2156	2583	2397	2672	Copz1	15	103272714	103299868	+	3662	protein_coding	coatomer protein complex, subunit zeta 1 [Source:MGI Symbol;Acc:MGI:1929063]	-	-
ENSMUSG00000047036	1768	2537	2329	2090	2621	2461	2503	2556	2593	2732	2097	2597	2257	2722	2454	Zfp445	9	122844529	122866006	-	7409	protein_coding	zinc finger protein 445 [Source:MGI Symbol;Acc:MGI:2143340]	-	-
ENSMUSG00000029577	3057	2626	2719	2298	2478	1633	2179	2356	2307	2340	2897	2321	1903	2457	2745	Ube3b	5	114380607	114421169	+	5294	protein_coding	ubiquitin protein ligase E3B [Source:MGI Symbol;Acc:MGI:1891295]	-	-
ENSMUSG00000036402	1739	2617	2572	2678	1715	1446	3310	3131	2834	2826	2966	2193	2569	1629	2085	Gng12	6	66896397	67021350	+	4727	protein_coding	guanine nucleotide binding protein (G protein), gamma 12 [Source:MGI Symbol;Acc:MGI:1336171]	-	-
ENSMUSG00000025220	1812	2605	2475	2843	2351	2051	2518	2419	2507	2477	2470	2646	2228	2423	2480	Mgea5	19	45750261	45783520	-	5024	protein_coding	meningioma expressed antigen 5 (hyaluronidase) [Source:MGI Symbol;Acc:MGI:1932139]	-	-
ENSMUSG00000055024	2684	2472	2245	1947	2277	1713	3023	3209	3076	2965	2540	2093	1758	2056	2227	Ep300	15	81585351	81652077	+	14273	protein_coding	E1A binding protein p300 [Source:MGI Symbol;Acc:MGI:1276116]	TAZ	TAZ
ENSMUSG00000025332	3020	2431	2175	2141	2236	1592	2779	2913	3050	2861	3204	2075	1482	1752	2563	Kdm5c	X	152233020	152274535	+	7110	protein_coding	lysine (K)-specific demethylase 5C [Source:MGI Symbol;Acc:MGI:99781]	ARID	ARID
ENSMUSG00000056537	2277	2620	2558	2437	2177	1741	2398	2393	2432	2527	2485	2485	2634	2411	2685	Rlim	X	103957163	103981284	-	8917	protein_coding	ring finger protein, LIM domain interacting [Source:MGI Symbol;Acc:MGI:1342291]	-	-
ENSMUSG00000026434	1994	2614	2322	2798	2388	1513	2163	2528	2140	2293	2302	2733	2589	2833	3035	Nucks1	1	131910534	131936321	+	6779	protein_coding	nuclear casein kinase and cyclin-dependent kinase substrate 1 [Source:MGI Symbol;Acc:MGI:1934811]	-	-
ENSMUSG00000030704	1931	2751	2640	2719	2359	1751	2340	2588	2353	2511	2237	2312	2559	2473	2721	Rab6a	7	100607410	100641268	+	3728	protein_coding	RAB6A, member RAS oncogene family [Source:MGI Symbol;Acc:MGI:894313]	-	-
ENSMUSG00000064215	1641	2167	2282	1980	2944	3685	3047	3189	3235	3446	1319	1614	1925	1799	1969	Ifi27	12	103434211	103440239	+	1467	protein_coding	interferon, alpha-inducible protein 27 [Source:MGI Symbol;Acc:MGI:1277180]	-	-
ENSMUSG00000021156	1890	2248	2224	2102	2518	2391	2785	2790	2707	2872	2310	2319	2303	2279	2483	Zmynd11	13	9684833	9765330	-	10955	protein_coding	zinc finger, MYND domain containing 11 [Source:MGI Symbol;Acc:MGI:1913755]	-	-
ENSMUSG00000002718	1726	2687	2734	2793	2171	1497	2401	2633	2406	2710	2422	2408	2018	2484	3069	Cse1l	2	166906040	166946389	+	5273	protein_coding	chromosome segregation 1-like (S. cerevisiae) [Source:MGI Symbol;Acc:MGI:1339951]	-	-
ENSMUSG00000027803	2477	2437	2535	2284	2380	1672	2683	2342	2460	2375	2191	2347	2881	2509	2552	Wwtr1	3	57455649	57575910	-	4779	protein_coding	WW domain containing transcription regulator 1 [Source:MGI Symbol;Acc:MGI:1917649]	-	-
ENSMUSG00000039347	1465	3894	3494	4782	1912	1359	1663	1736	2018	1775	2598	2863	1161	3305	2081	Atp6v0e2	6	48537615	48541801	+	2381	protein_coding	ATPase, H+ transporting, lysosomal V0 subunit E2 [Source:MGI Symbol;Acc:MGI:1923502]	-	-
ENSMUSG00000021832	1744	3101	2621	3064	2104	1780	2027	2213	2118	2258	1813	2598	2771	2956	2914	Psmc6	14	45329788	45349705	+	3498	protein_coding	proteasome (prosome, macropain) 26S subunit, ATPase, 6 [Source:MGI Symbol;Acc:MGI:1914339]	-	-
ENSMUSG00000026176	2150	2044	2339	1839	2569	2411	3245	2991	2875	2802	2657	2269	1820	1852	2180	Ctdsp1	1	74391509	74397285	+	3334	protein_coding	CTD (carboxy-terminal domain, RNA polymerase II, polypeptide A) small phosphatase 1 [Source:MGI Symbol;Acc:MGI:2654470]	-	-
ENSMUSG00000028053	2441	2439	1954	2025	1942	1604	3412	3542	3306	3347	2493	1895	1590	1889	2163	Ash1l	3	88950622	89079375	+	14838	protein_coding	ASH1 like histone lysine methyltransferase [Source:MGI Symbol;Acc:MGI:2183158]	SET	SET
ENSMUSG00000032637	2038	2509	2165	1928	3120	2669	2283	2426	2453	2325	2140	2453	2141	2679	2712	Atxn2l	7	126491708	126503437	-	4782	protein_coding	ataxin 2-like [Source:MGI Symbol;Acc:MGI:2446242]	-	-
ENSMUSG00000036093	2316	2120	1975	1833	1640	1540	3743	3679	4151	3683	2338	1728	1742	1714	1825	Arl5a	2	52397951	52424901	-	5409	protein_coding	ADP-ribosylation factor-like 5A [Source:MGI Symbol;Acc:MGI:1922673]	-	-
ENSMUSG00000018604	2882	2248	1983	1219	1880	3086	3968	4315	3486	3852	1226	1280	1486	1409	1696	Tbx3	5	119670669	119684724	+	6624	protein_coding	T-box 3 [Source:MGI Symbol;Acc:MGI:98495]	-	-
ENSMUSG00000039114	1583	3140	2645	3473	1271	2417	2454	2901	3231	2392	2599	2510	771	3082	1544	Nrn1	13	36725361	36735131	-	2249	protein_coding	neuritin 1 [Source:MGI Symbol;Acc:MGI:1915654]	-	-
ENSMUSG00000008763	2430	2629	2297	2252	2053	1366	2876	3048	2706	2904	2727	2138	2028	1864	2616	Man1a2	3	100562208	100685503	-	7969	protein_coding	mannosidase, alpha, class 1A, member 2 [Source:MGI Symbol;Acc:MGI:104676]	-	-
ENSMUSG00000084319	2298	2562	2776	2401	2332	2266	1731	1690	1621	1795	2065	2169	3661	2881	3576	Tpt1-ps3	6	99877816	99878334	-	519	processed_pseudogene	tumor protein, translationally-controlled, pseudogene 3 [Source:MGI Symbol;Acc:MGI:2664997]	-	-
ENSMUSG00000054611	2344	2307	2188	1976	2224	1680	2943	2992	2815	2798	3172	2306	1781	1968	2307	Kdm2a	19	4314419	4398285	-	14294	protein_coding	lysine (K)-specific demethylase 2A [Source:MGI Symbol;Acc:MGI:1354736]	Jumonji	Jumonji
ENSMUSG00000025871	1967	2697	2583	2701	2276	1951	2622	2896	3003	2932	2344	2063	1943	1731	2090	4833439L19Rik	13	54551218	54565435	-	3187	protein_coding	RIKEN cDNA 4833439L19 gene [Source:MGI Symbol;Acc:MGI:1921162]	-	-
ENSMUSG00000003038	1787	2436	2412	2515	2364	2121	1609	1764	1764	1668	1575	3106	2791	3596	4285	Hmgn2	4	133964738	133968650	-	3060	protein_coding	high mobility group nucleosomal binding domain 2 [Source:MGI Symbol;Acc:MGI:96136]	-	-
ENSMUSG00000046329	2160	2433	2215	2042	1812	2366	2856	3047	3241	2932	2406	1981	1836	2242	2109	Slc25a23	17	57043711	57059863	-	5294	protein_coding	solute carrier family 25 (mitochondrial carrier; phosphate carrier), member 23 [Source:MGI Symbol;Acc:MGI:1914222]	-	-
ENSMUSG00000074785	1849	1452	3005	2114	5593	842	1014	2449	1151	1145	2042	3431	2092	2682	4816	Plxnc1	10	94790866	94944835	-	8349	protein_coding	plexin C1 [Source:MGI Symbol;Acc:MGI:1890127]	-	-
ENSMUSG00000019471	2247	2392	2269	2059	2627	2430	2580	2570	2661	2581	2537	2232	1923	2009	2560	Cdc37	9	21133222	21149982	-	8194	protein_coding	cell division cycle 37 [Source:MGI Symbol;Acc:MGI:109531]	-	-
ENSMUSG00000028868	2407	2290	2117	2067	2330	1943	3089	3067	3035	2766	2573	2113	1699	1899	2269	Wasf2	4	133130505	133199756	+	6258	protein_coding	WAS protein family, member 2 [Source:MGI Symbol;Acc:MGI:1098641]	-	-
ENSMUSG00000052915	2677	2246	2362	2029	2347	2213	2840	2769	2618	2533	2326	2215	2195	1970	2267	Msl1	11	98795516	98807859	+	5433	protein_coding	male specific lethal 1 [Source:MGI Symbol;Acc:MGI:1921276]	-	-
ENSMUSG00000029221	1667	2318	2502	2571	2597	1889	2253	2475	2348	2591	2080	2548	2357	2484	2916	Slc30a9	5	67306955	67358443	+	12374	protein_coding	solute carrier family 30 (zinc transporter), member 9 [Source:MGI Symbol;Acc:MGI:1923690]	-	-
ENSMUSG00000028552	2475	2437	2179	2218	1908	1656	3040	2810	2573	3071	2041	2225	2147	2236	2527	Eps15	4	109280268	109387817	+	6931	protein_coding	epidermal growth factor receptor pathway substrate 15 [Source:MGI Symbol;Acc:MGI:104583]	-	-
ENSMUSG00000029050	2558	2372	2260	2006	2146	1525	2839	2577	2660	2341	3002	2277	2449	2009	2511	Ski	4	155154075	155222592	-	5562	protein_coding	ski sarcoma viral oncogene homolog (avian) [Source:MGI Symbol;Acc:MGI:98310]	-	-
ENSMUSG00000005873	2407	2765	2485	2164	1990	2101	2818	2887	2595	2871	2206	1779	2233	1911	2299	Reep5	18	34344889	34373415	-	2894	protein_coding	receptor accessory protein 5 [Source:MGI Symbol;Acc:MGI:1270152]	-	-
ENSMUSG00000022052	1945	2498	2747	2064	2654	1631	2422	2586	2985	2562	1783	2095	2509	2093	2929	Ppp2r2a	14	67014056	67072444	-	5381	protein_coding	protein phosphatase 2, regulatory subunit B, alpha [Source:MGI Symbol;Acc:MGI:1919228]	-	-
ENSMUSG00000021994	1838	2263	1963	1445	1415	2007	3754	3704	3955	4020	2145	1425	2098	1609	1856	Wnt5a	14	28504750	28527448	+	7823	protein_coding	wingless-type MMTV integration site family, member 5A [Source:MGI Symbol;Acc:MGI:98958]	-	-
ENSMUSG00000079111	2297	2906	2856	2614	2500	2046	1811	2185	1830	2059	2044	2115	2705	2740	2762	Kdelr2	5	143403838	143421901	+	1829	protein_coding	KDEL (Lys-Asp-Glu-Leu) endoplasmic reticulum protein retention receptor 2 [Source:MGI Symbol;Acc:MGI:1914163]	-	-
ENSMUSG00000024074	2621	1861	3292	2214	5428	806	1609	1781	1584	1170	1853	2670	2957	2062	3554	Crim1	17	78200248	78376592	+	5995	protein_coding	cysteine rich transmembrane BMP regulator 1 (chordin like) [Source:MGI Symbol;Acc:MGI:1354756]	-	-
ENSMUSG00000017221	1690	2887	2528	2510	2316	2045	2489	2508	2281	2301	2700	2289	2134	2161	2590	Psmd3	11	98682554	98695979	+	4967	protein_coding	proteasome (prosome, macropain) 26S subunit, non-ATPase, 3 [Source:MGI Symbol;Acc:MGI:98858]	-	-
ENSMUSG00000003363	1809	2196	2275	1868	2545	3119	2600	3360	2587	3189	1594	1908	1850	2004	2524	Pld3	7	27532000	27553218	-	2924	protein_coding	phospholipase D family, member 3 [Source:MGI Symbol;Acc:MGI:1333782]	-	-
ENSMUSG00000020644	1993	3381	2040	3399	1794	1508	2335	2326	2677	2279	1274	1843	1852	3783	2925	Id2	12	25093799	25097140	-	2438	protein_coding	inhibitor of DNA binding 2 [Source:MGI Symbol;Acc:MGI:96397]	bHLH	bHLH
ENSMUSG00000062270	1602	2588	2085	2159	2302	1522	2717	3043	2537	2732	2345	2475	2232	1988	3070	Morf4l1	9	90091665	90114774	-	9754	protein_coding	mortality factor 4 like 1 [Source:MGI Symbol;Acc:MGI:1096551]	-	-
ENSMUSG00000038264	1372	2956	1742	2511	4921	1878	1984	2382	2061	1832	1522	2646	1947	2465	3171	Sema7a	9	57940112	57962865	+	3298	protein_coding	sema domain, immunoglobulin domain (Ig), and GPI membrane anchor, (semaphorin) 7A [Source:MGI Symbol;Acc:MGI:1306826]	-	-
ENSMUSG00000049354	2234	2258	2249	2005	1815	1601	2900	3137	2919	2707	3287	2128	1860	1935	2349	Dcaf7	11	106036872	106059324	+	6133	protein_coding	DDB1 and CUL4 associated factor 7 [Source:MGI Symbol;Acc:MGI:1919083]	-	-
ENSMUSG00000020821	2898	2331	2292	1473	2004	2075	3541	3096	2727	2850	2955	1592	1552	1824	2134	Kif1c	11	70700548	70731964	+	7276	protein_coding	kinesin family member 1C [Source:MGI Symbol;Acc:MGI:1098260]	-	-
ENSMUSG00000025364	2103	2791	2369	2557	2456	2093	1871	1847	1886	1814	2148	2598	2421	3084	3286	Pa2g4	10	128557766	128565987	-	2804	protein_coding	proliferation-associated 2G4 [Source:MGI Symbol;Acc:MGI:894684]	-	-
ENSMUSG00000035203	2189	2496	2395	1940	2540	2598	2711	2635	2753	2639	2060	2079	2046	1970	2250	Epn1	7	5080235	5098178	+	2810	protein_coding	epsin 1 [Source:MGI Symbol;Acc:MGI:1333763]	-	-
ENSMUSG00000013858	1955	2445	1967	1798	2956	3238	2622	2546	2639	2474	1727	1959	2143	2298	2529	Tmem259	10	79974948	79984330	-	4663	protein_coding	transmembrane protein 259 [Source:MGI Symbol;Acc:MGI:2177957]	-	-
ENSMUSG00000004270	2440	4141	2346	2297	1912	2008	2044	1933	2390	2174	1791	1907	1658	3247	2959	Lpcat3	6	124663027	124704418	+	3268	protein_coding	lysophosphatidylcholine acyltransferase 3 [Source:MGI Symbol;Acc:MGI:1315211]	-	-
ENSMUSG00000005534	2302	2315	2067	2079	1997	2210	3009	2844	2769	2883	2256	2015	2096	2140	2265	Insr	8	3122061	3279617	-	13746	protein_coding	insulin receptor [Source:MGI Symbol;Acc:MGI:96575]	-	-
ENSMUSG00000020390	1652	2560	2218	2715	2280	2091	1981	2142	2211	2200	1748	2689	2871	2959	2928	Ube2b	11	51985497	52000762	-	2126	protein_coding	ubiquitin-conjugating enzyme E2B [Source:MGI Symbol;Acc:MGI:102944]	-	-
ENSMUSG00000013584	1366	2494	2744	2337	1888	2662	2598	2625	3138	2861	1254	1672	1746	2886	2963	Aldh1a2	9	71215789	71296243	+	2264	protein_coding	aldehyde dehydrogenase family 1, subfamily A2 [Source:MGI Symbol;Acc:MGI:107928]	-	-
ENSMUSG00000054364	2521	2526	2282	1799	2723	2100	2723	2222	2426	2276	2472	1926	3151	1903	2184	Rhob	12	8497661	8500009	-	2349	protein_coding	ras homolog family member B [Source:MGI Symbol;Acc:MGI:107949]	-	-
ENSMUSG00000069729	2570	2078	2395	2094	1945	1674	2981	2949	2836	2966	2960	2113	1786	1729	2156	Arid1b	17	4994332	5347656	+	12600	protein_coding	AT rich interactive domain 1B (SWI-like) [Source:MGI Symbol;Acc:MGI:1926129]	ARID	ARID
ENSMUSG00000048874	2766	2289	2452	2114	2367	1570	2314	2418	2305	2392	2825	2499	2199	2289	2421	Phf3	1	30802339	30873921	-	14190	protein_coding	PHD finger protein 3 [Source:MGI Symbol;Acc:MGI:2446126]	PHD	PHD
ENSMUSG00000028156	1669	3123	2721	2701	1860	1606	2386	2438	2419	2479	1875	2320	2485	2390	2719	Eif4e	3	138526179	138559696	+	6008	protein_coding	eukaryotic translation initiation factor 4E [Source:MGI Symbol;Acc:MGI:95305]	-	-
ENSMUSG00000015291	1356	2092	1943	2215	2809	2483	2351	2813	2540	2722	1714	2611	2515	2559	2461	Gdi1	X	74304998	74311862	+	4296	protein_coding	guanosine diphosphate (GDP) dissociation inhibitor 1 [Source:MGI Symbol;Acc:MGI:99846]	-	-
ENSMUSG00000071646	2128	2293	2131	2017	2512	2505	2495	2696	2663	2478	2210	2166	2069	2167	2650	Mta2	19	8941875	8952303	+	4093	protein_coding	metastasis-associated gene family, member 2 [Source:MGI Symbol;Acc:MGI:1346340]	C2C2-GATA	C2C2->C2C2-GATA
ENSMUSG00000054008	3124	2230	2335	1985	1728	1081	3357	3100	3139	2910	3747	1985	1100	1392	1959	Ndst1	18	60685978	60713389	-	6070	protein_coding	N-deacetylase/N-sulfotransferase (heparan glucosaminyl) 1 [Source:MGI Symbol;Acc:MGI:104719]	-	-
ENSMUSG00000027624	2949	3463	2367	2627	1893	1645	2705	2330	2872	2151	2621	1585	1726	2300	1926	Epb41l1	2	156420909	156543214	+	11530	protein_coding	erythrocyte membrane protein band 4.1 like 1 [Source:MGI Symbol;Acc:MGI:103010]	-	-
ENSMUSG00000020250	1543	2960	2695	3545	2099	1455	2052	2139	2209	1979	2521	2822	2086	2600	2446	Txnrd1	10	82833951	82897712	+	7086	protein_coding	thioredoxin reductase 1 [Source:MGI Symbol;Acc:MGI:1354175]	-	-
ENSMUSG00000074305	4379	2011	2101	1529	1686	1564	3670	3208	2793	3113	2795	1551	1566	1399	1745	Peak1	9	56201126	56418067	-	12351	protein_coding	pseudopodium-enriched atypical kinase 1 [Source:MGI Symbol;Acc:MGI:2442366]	-	-
ENSMUSG00000074748	2180	2360	2367	2091	2236	1758	2512	2566	2604	2487	2838	2384	2147	2156	2420	Atxn7l3b	10	112925430	112929001	-	3572	protein_coding	ataxin 7-like 3B [Source:MGI Symbol;Acc:MGI:1914971]	-	-
ENSMUSG00000004591	2047	2460	2435	2490	2167	1450	2551	2437	2449	2521	2462	2442	2446	2391	2339	Pkn2	3	142790902	142882004	-	12877	protein_coding	protein kinase N2 [Source:MGI Symbol;Acc:MGI:109211]	-	-
ENSMUSG00000061838	1024	2185	2147	2355	2294	2152	2790	3324	3034	3196	1456	2251	2123	2141	2595	Suclg2	6	95473009	95718800	-	4623	protein_coding	succinate-Coenzyme A ligase, GDP-forming, beta subunit [Source:MGI Symbol;Acc:MGI:1306824]	-	-
ENSMUSG00000021144	2380	2289	2324	2093	2589	2238	2168	2325	2238	2209	2384	2280	2544	2394	2607	Mta1	12	113098278	113137206	+	3104	protein_coding	metastasis associated 1 [Source:MGI Symbol;Acc:MGI:2150037]	C2C2-GATA	C2C2->C2C2-GATA
ENSMUSG00000005625	2150	2795	2400	2037	2446	3122	2159	2362	2141	2510	1629	2056	2011	2480	2756	Psmd4	3	95032694	95042614	-	2808	protein_coding	proteasome (prosome, macropain) 26S subunit, non-ATPase, 4 [Source:MGI Symbol;Acc:MGI:1201670]	-	-
ENSMUSG00000002028	3080	2184	2023	1668	2172	2126	2867	2801	2758	2856	2580	2053	1741	2229	1900	Kmt2a	9	44803355	44881296	-	16670	protein_coding	lysine (K)-specific methyltransferase 2A [Source:MGI Symbol;Acc:MGI:96995]	PHD	PHD
ENSMUSG00000040848	2082	1650	1869	1755	1898	1725	3756	3466	3707	3295	2972	1923	1534	1455	1948	Sft2d2	1	165174337	165194438	-	5702	protein_coding	SFT2 domain containing 2 [Source:MGI Symbol;Acc:MGI:1917362]	-	-
ENSMUSG00000021136	1996	2384	2905	2327	2715	1657	1994	2552	2466	2116	1759	2261	2423	2359	3101	Smoc1	12	81026808	81186414	+	3496	protein_coding	SPARC related modular calcium binding 1 [Source:MGI Symbol;Acc:MGI:1929878]	-	-
ENSMUSG00000068735	3094	1886	1905	1382	2568	2881	2440	3949	3149	3429	1351	2069	1629	1507	1764	Trp53i11	2	93187548	93201759	+	3690	protein_coding	transformation related protein 53 inducible protein 11 [Source:MGI Symbol;Acc:MGI:2670995]	-	-
ENSMUSG00000034714	3951	2882	2826	2678	1450	2073	2391	2289	2811	2352	2709	1724	957	2109	1746	Ttyh2	11	114675431	114720977	+	3739	protein_coding	tweety family member 2 [Source:MGI Symbol;Acc:MGI:2157091]	-	-
novel.779	2005	2933	3159	2748	1916	1971	3714	2433	2835	2804	2620	1392	2084	1101	1220	-	4	149433557	149439471	-	5915	-	- && sp|P11227|POL_MLVRD Gag-Pol polyprotein OS=Radiation murine leukemia virus OX=11787 GN=pol PE=3 SV=2 && PF01140:Matrix protein (MA), p15	-	-
ENSMUSG00000063273	2481	2712	2728	2518	2047	1472	2076	2240	2165	2110	2603	2373	2493	2344	2572	Naa15	3	51415148	51476507	+	15427	protein_coding	N(alpha)-acetyltransferase 15, NatA auxiliary subunit [Source:MGI Symbol;Acc:MGI:1922088]	-	-
ENSMUSG00000062929	1800	2857	2317	2603	2173	1715	2334	2350	2142	2348	1840	2392	2525	2693	2819	Cfl2	12	54858809	54862877	-	3266	protein_coding	cofilin 2, muscle [Source:MGI Symbol;Acc:MGI:101763]	-	-
ENSMUSG00000031885	2152	2719	2193	2419	2220	1299	2631	2905	2468	2582	2123	2518	1782	2257	2636	Cbfb	8	105170674	105217989	+	3480	protein_coding	core binding factor beta [Source:MGI Symbol;Acc:MGI:99851]	-	-
ENSMUSG00000068566	2346	3146	2571	2151	2271	1609	2285	2173	2176	2123	2368	2203	2654	2134	2688	Myadm	7	3289080	3300442	+	4480	protein_coding	myeloid-associated differentiation marker [Source:MGI Symbol;Acc:MGI:1355332]	-	-
ENSMUSG00000022216	1860	2545	2473	2647	2471	3315	1941	2226	1837	2392	1525	2150	2130	2632	2739	Psme1	14	55578123	55581529	+	2209	protein_coding	proteasome (prosome, macropain) activator subunit 1 (PA28 alpha) [Source:MGI Symbol;Acc:MGI:1096367]	-	-
ENSMUSG00000015671	1518	2495	2092	2671	2660	2487	1872	2160	2055	2289	1579	2563	2469	2936	3030	Psma2	13	14613240	14674236	+	3673	protein_coding	proteasome (prosome, macropain) subunit, alpha type 2 [Source:MGI Symbol;Acc:MGI:104885]	-	-
ENSMUSG00000003131	1783	2497	2445	2592	2196	1650	2460	2688	2511	2223	2452	2315	2333	2125	2574	Pafah1b2	9	45962859	46012690	-	8266	protein_coding	platelet-activating factor acetylhydrolase, isoform 1b, subunit 2 [Source:MGI Symbol;Acc:MGI:108415]	-	-
ENSMUSG00000001441	2785	2475	2224	2001	2056	1976	2504	2602	2668	2597	2585	2065	1939	2094	2248	Npepps	11	97205842	97280638	-	7206	protein_coding	aminopeptidase puromycin sensitive [Source:MGI Symbol;Acc:MGI:1101358]	-	-
ENSMUSG00000027067	1976	2394	2116	2235	2177	1463	2385	2379	2384	2256	3143	2700	1860	2280	3058	Ssrp1	2	85037234	85047109	+	3737	protein_coding	structure specific recognition protein 1 [Source:MGI Symbol;Acc:MGI:107912]	HMG	HMG
novel.338	1546	2070	1719	1995	1962	2518	4292	4717	3260	3526	1145	1146	1868	1421	1608	-	15	82358743	82367983	+	6118	-	- && sp|P03359|POL_WMSV Gag-Pol polyprotein OS=Woolly monkey sarcoma virus OX=11970 GN=pol PE=3 SV=2 && PF01140:Matrix protein (MA), p15	-	-
ENSMUSG00000078622	2112	2651	2479	2278	2136	1784	2511	2673	2405	2675	2355	2088	1989	2152	2504	Ccdc47	11	106197408	106216344	-	6414	protein_coding	coiled-coil domain containing 47 [Source:MGI Symbol;Acc:MGI:1914413]	-	-
ENSMUSG00000031004	4433	2390	2228	2706	2644	811	517	567	619	715	3033	3321	2340	3940	4518	Mki67	7	135689784	135716361	-	10061	protein_coding	antigen identified by monoclonal antibody Ki 67 [Source:MGI Symbol;Acc:MGI:106035]	-	-
ENSMUSG00000022150	2020	2236	2301	2269	2969	1191	1751	1882	1735	1385	2070	3053	2800	3298	3808	Dab2	15	6299788	6440712	+	7342	protein_coding	disabled 2, mitogen-responsive phosphoprotein [Source:MGI Symbol;Acc:MGI:109175]	-	-
ENSMUSG00000032827	2155	1908	2204	1956	2143	2378	2490	3033	2598	2991	2079	2055	2348	2388	1988	Ppp1r9a	6	4902917	5165661	+	14531	protein_coding	protein phosphatase 1, regulatory subunit 9A [Source:MGI Symbol;Acc:MGI:2442401]	-	-
ENSMUSG00000042207	2825	2121	2393	2124	2244	1650	2345	2374	2347	2378	3101	2274	2181	2087	2256	Kdm5b	1	134560171	134635285	+	16555	protein_coding	lysine (K)-specific demethylase 5B [Source:MGI Symbol;Acc:MGI:1922855]	ARID	ARID
ENSMUSG00000021843	2375	2303	2153	2164	2416	1632	1880	1982	1923	1873	2487	2432	2864	3138	3072	Ktn1	14	47648448	47739894	+	12912	protein_coding	kinectin 1 [Source:MGI Symbol;Acc:MGI:109153]	-	-
ENSMUSG00000038462	1395	2382	2155	2308	2348	2238	2581	2700	2811	2716	1658	2283	2067	2390	2656	Uqcrfs1	13	30540308	30545362	-	1363	protein_coding	ubiquinol-cytochrome c reductase, Rieske iron-sulfur polypeptide 1 [Source:MGI Symbol;Acc:MGI:1913944]	-	-
ENSMUSG00000029407	2193	2271	2573	2137	2194	1651	2394	2520	2471	2524	2452	1898	2440	2348	2620	Uso1	5	92137938	92202798	+	5847	protein_coding	USO1 vesicle docking factor [Source:MGI Symbol;Acc:MGI:1929095]	-	-
ENSMUSG00000034928	1564	2246	2007	2053	2279	2037	3039	3064	3004	3042	2125	2132	1989	1955	2140	Rnf44	13	54679399	54693907	-	5202	protein_coding	ring finger protein 44 [Source:MGI Symbol;Acc:MGI:2145310]	-	-
ENSMUSG00000044788	2017	3102	1949	2378	1437	1591	3532	2837	3959	2764	1983	1992	1064	2259	1809	Fads6	11	115279622	115297663	-	6653	protein_coding	fatty acid desaturase domain family, member 6 [Source:MGI Symbol;Acc:MGI:3039592]	-	-
ENSMUSG00000021500	2476	2283	2160	2154	2437	1876	2409	2395	2322	2384	2234	2155	2345	2553	2490	Ddx46	13	55635027	55681256	+	7295	protein_coding	DEAD (Asp-Glu-Ala-Asp) box polypeptide 46 [Source:MGI Symbol;Acc:MGI:1920895]	-	-
ENSMUSG00000020326	2878	2803	2680	2352	1716	1507	2622	2459	2433	2741	2695	1549	1918	2084	2221	Ccng1	11	40748552	40755311	-	3512	protein_coding	cyclin G1 [Source:MGI Symbol;Acc:MGI:102890]	-	-
ENSMUSG00000029096	1794	1892	1826	1688	2121	3397	3530	2671	3016	2892	1658	1705	2244	1941	2235	Htra3	5	35652023	35679782	-	4439	protein_coding	HtrA serine peptidase 3 [Source:MGI Symbol;Acc:MGI:1925808]	-	-
ENSMUSG00000031232	2340	2560	2614	2501	1997	1799	2253	2624	2335	2573	2354	2352	2050	1948	2307	Magt1	X	105968084	106011906	-	4672	protein_coding	magnesium transporter 1 [Source:MGI Symbol;Acc:MGI:1914325]	-	-
ENSMUSG00000058446	2203	1942	2244	1868	2269	1761	2832	3705	2841	3190	2356	1866	1927	1493	2110	Znrf2	6	54816916	54893500	+	6176	protein_coding	zinc and ring finger 2 [Source:MGI Symbol;Acc:MGI:1196246]	-	-
ENSMUSG00000032393	2649	2242	2380	2109	1884	1314	2781	2737	2758	2645	2832	2162	1858	1907	2302	Dpp8	9	65032414	65082651	+	13707	protein_coding	dipeptidylpeptidase 8 [Source:MGI Symbol;Acc:MGI:1921638]	-	-
ENSMUSG00000036053	1641	2297	2608	3187	2200	1657	2133	2156	2244	2464	2193	2492	2056	2673	2536	Fmnl2	2	52857860	53133804	+	5636	protein_coding	formin-like 2 [Source:MGI Symbol;Acc:MGI:1918659]	-	-
ENSMUSG00000027006	1981	2458	2457	2306	2284	1536	2186	2139	2122	2098	2524	2404	2391	2553	3067	Dnajc10	2	80315466	80354043	+	5004	protein_coding	DnaJ heat shock protein family (Hsp40) member C10 [Source:MGI Symbol;Acc:MGI:1914111]	-	-
ENSMUSG00000025232	1562	2148	1963	1911	2304	2300	3018	2995	3127	3063	1870	2105	1897	1653	2568	Hexa	9	59539540	59565109	+	1996	protein_coding	hexosaminidase A [Source:MGI Symbol;Acc:MGI:96073]	-	-
ENSMUSG00000084106	2049	2610	3015	3097	2019	1528	1627	1590	1710	1776	1929	2386	2793	2751	3600	Gm6136	1	86908793	86909683	-	891	processed_pseudogene	predicted pseudogene 6136 [Source:MGI Symbol;Acc:MGI:3646897]	-	-
ENSMUSG00000028138	1396	2058	2117	1954	2467	2449	2358	2754	2398	2946	1767	2229	2433	2166	2953	Adh5	3	138443093	138455499	+	5408	protein_coding	alcohol dehydrogenase 5 (class III), chi polypeptide [Source:MGI Symbol;Acc:MGI:87929]	-	-
ENSMUSG00000066026	1707	2522	2129	1908	2165	3028	3040	3050	3106	3272	882	1974	2105	1543	1986	Dhrs3	4	144892827	144928209	+	2927	protein_coding	dehydrogenase/reductase (SDR family) member 3 [Source:MGI Symbol;Acc:MGI:1315215]	-	-
ENSMUSG00000029776	1536	2352	2004	2179	2371	2417	2313	2592	2476	2611	1748	2197	2439	2369	2811	Hibadh	6	52546228	52640389	-	10179	protein_coding	3-hydroxyisobutyrate dehydrogenase [Source:MGI Symbol;Acc:MGI:1889802]	-	-
ENSMUSG00000039367	2016	2244	2158	1787	2305	1698	2800	2862	2768	2788	2489	2048	2070	1782	2598	Sec24c	14	20674308	20694852	+	6293	protein_coding	Sec24 related gene family, member C (S. cerevisiae) [Source:MGI Symbol;Acc:MGI:1919746]	-	-
ENSMUSG00000034903	2394	2819	1643	1567	1384	1710	3445	3690	3641	3361	1534	1224	1792	2259	1932	Cobll1	2	65088339	65239403	-	8342	protein_coding	Cobl-like 1 [Source:MGI Symbol;Acc:MGI:2442894]	-	-
ENSMUSG00000015733	1702	2661	2392	2494	1992	1501	2645	2655	2637	2598	2281	2260	2187	1861	2525	Capza2	6	17636234	17666972	+	5890	protein_coding	capping protein (actin filament) muscle Z-line, alpha 2 [Source:MGI Symbol;Acc:MGI:106222]	-	-
ENSMUSG00000030105	1906	2547	2550	2477	1724	1571	2623	2691	2646	2673	2322	2154	2021	1757	2725	Arl8b	6	108783099	108825278	+	4479	protein_coding	ADP-ribosylation factor-like 8B [Source:MGI Symbol;Acc:MGI:1914416]	-	-
ENSMUSG00000004264	1845	2959	2538	2765	2142	2154	1963	1892	1874	1935	2366	2482	2022	2784	2644	Phb2	6	124712336	124716950	+	3718	protein_coding	prohibitin 2 [Source:MGI Symbol;Acc:MGI:102520]	-	-
ENSMUSG00000027204	3171	2433	2066	1735	2033	1225	2863	2787	2739	2406	3171	1990	1982	1365	2398	Fbn1	2	125300594	125507993	-	12128	protein_coding	fibrillin 1 [Source:MGI Symbol;Acc:MGI:95489]	-	-
ENSMUSG00000029406	2985	2063	2422	2073	1984	2223	2785	2830	2733	2522	2894	2044	1367	1855	1567	Pitpnm2	5	124118690	124249760	-	12843	protein_coding	phosphatidylinositol transfer protein, membrane-associated 2 [Source:MGI Symbol;Acc:MGI:1336192]	-	-
ENSMUSG00000002812	2264	2430	2151	2003	2124	2098	2590	2720	2651	2546	2558	1905	1886	2079	2294	Flii	11	60714123	60727263	-	5039	protein_coding	flightless I actin binding protein [Source:MGI Symbol;Acc:MGI:1342286]	-	-
ENSMUSG00000043940	2257	2102	1917	1981	2140	1687	2973	2914	2717	2756	2839	2200	1816	1785	2173	Wdfy3	5	101832956	102069921	-	15346	protein_coding	WD repeat and FYVE domain containing 3 [Source:MGI Symbol;Acc:MGI:1096875]	-	-
ENSMUSG00000025326	2336	2680	2576	2698	1580	1210	2459	2626	2473	2654	3017	2105	1734	1753	2346	Ube3a	7	59228750	59311536	+	20626	protein_coding	ubiquitin protein ligase E3A [Source:MGI Symbol;Acc:MGI:105098]	-	-
ENSMUSG00000000568	1727	2071	1963	2305	2927	2243	1722	2028	1471	1923	1861	2872	2433	3259	3435	Hnrnpd	5	99955935	99978938	-	7354	protein_coding	heterogeneous nuclear ribonucleoprotein D [Source:MGI Symbol;Acc:MGI:101947]	-	-
ENSMUSG00000017721	2115	2327	2530	1795	2037	1604	2481	2450	2696	2420	3881	1765	2506	1598	2023	Pigt	2	164497520	164508301	+	3856	protein_coding	phosphatidylinositol glycan anchor biosynthesis, class T [Source:MGI Symbol;Acc:MGI:1926178]	-	-
ENSMUSG00000005871	2857	2213	2226	1804	1918	1602	2810	3221	2590	3086	2583	1779	1769	1815	1943	Apc	18	34220924	34322189	+	15753	protein_coding	adenomatosis polyposis coli [Source:MGI Symbol;Acc:MGI:88039]	-	-
ENSMUSG00000002015	1620	2629	2239	2215	2379	2839	2284	2322	2268	2438	1731	2065	2261	2382	2532	Bcap31	X	73686178	73716175	-	1219	protein_coding	B cell receptor associated protein 31 [Source:MGI Symbol;Acc:MGI:1350933]	-	-
ENSMUSG00000021413	1281	2587	1921	2212	2503	2049	2471	2363	2380	2410	1954	2617	2278	2834	2341	Prpf4b	13	34875302	34906064	+	8430	protein_coding	pre-mRNA processing factor 4B [Source:MGI Symbol;Acc:MGI:109584]	-	-
ENSMUSG00000022261	2116	2317	2029	1938	2300	1618	2445	2399	2438	2218	2025	2326	2621	2225	3165	Sdc2	15	32920723	33034935	+	3527	protein_coding	syndecan 2 [Source:MGI Symbol;Acc:MGI:1349165]	-	-
ENSMUSG00000030161	2103	2000	2126	1793	2154	2390	2811	2853	2746	2774	2062	2117	1996	1864	2390	Gabarapl1	6	129533160	129542346	+	2013	protein_coding	gamma-aminobutyric acid (GABA) A receptor-associated protein-like 1 [Source:MGI Symbol;Acc:MGI:1914980]	-	-
ENSMUSG00000027363	2051	2399	2349	2234	2221	1692	2387	2433	2520	2582	2237	2284	2138	2245	2406	Usp8	2	126707328	126759297	+	4193	protein_coding	ubiquitin specific peptidase 8 [Source:MGI Symbol;Acc:MGI:1934029]	-	-
ENSMUSG00000002524	1734	2341	2255	1980	2502	2653	2218	2397	2395	2547	2081	2091	2135	2340	2506	Puf60	15	76070182	76080924	-	4748	protein_coding	poly-U binding splicing factor 60 [Source:MGI Symbol;Acc:MGI:1915209]	-	-
ENSMUSG00000032440	2161	2422	2320	1660	2033	1698	3280	2683	2907	2471	2331	2005	2330	1752	2069	Tgfbr2	9	116084293	116175360	-	8187	protein_coding	transforming growth factor, beta receptor II [Source:MGI Symbol;Acc:MGI:98729]	-	-
ENSMUSG00000019302	2159	2070	1819	1818	2339	2872	2851	3333	2710	3434	1824	1445	1650	1741	2038	Atp6v0a1	11	101009452	101063719	+	6556	protein_coding	ATPase, H+ transporting, lysosomal V0 subunit A1 [Source:MGI Symbol;Acc:MGI:103286]	-	-
ENSMUSG00000026618	1754	2400	2478	2564	1895	1716	2464	2946	2846	2803	2123	2269	1694	2023	2109	Iars2	1	185284726	185329396	-	8885	protein_coding	isoleucine-tRNA synthetase 2, mitochondrial [Source:MGI Symbol;Acc:MGI:1919586]	-	-
ENSMUSG00000019210	1792	2339	2652	2027	2737	2320	2480	2335	2615	2540	1596	1888	2212	2272	2279	Atp6v1e1	6	120794305	120822793	-	4110	protein_coding	ATPase, H+ transporting, lysosomal V1 subunit E1 [Source:MGI Symbol;Acc:MGI:894326]	-	-
ENSMUSG00000032193	1499	2942	1885	3230	1776	1922	2730	3335	2728	3034	2225	1954	852	2374	1597	Ldlr	9	21723483	21749919	+	9622	protein_coding	low density lipoprotein receptor [Source:MGI Symbol;Acc:MGI:96765]	-	-
ENSMUSG00000074781	1653	2556	2478	2652	2297	2027	1990	2221	2378	2313	1949	2138	2645	2446	2334	Ube2n	10	95515145	95545657	+	4221	protein_coding	ubiquitin-conjugating enzyme E2N [Source:MGI Symbol;Acc:MGI:1934835]	-	-
ENSMUSG00000044221	2001	2372	2180	2343	2030	1674	2412	2503	2340	2596	2031	2273	2334	2200	2759	Grsf1	5	88659448	88676171	-	3036	protein_coding	G-rich RNA sequence binding factor 1 [Source:MGI Symbol;Acc:MGI:106479]	-	-
ENSMUSG00000023830	3129	2539	1923	1971	1750	1536	2816	2585	3067	2684	2822	2072	1232	1837	2084	Igf2r	17	12682406	12769664	-	9308	protein_coding	insulin-like growth factor 2 receptor [Source:MGI Symbol;Acc:MGI:96435]	-	-
ENSMUSG00000037234	2549	2471	2187	1894	2001	1646	2599	2884	2770	2862	2063	2050	1903	2000	2145	Hook3	8	26021421	26119224	-	28486	protein_coding	hook microtubule tethering protein 3 [Source:MGI Symbol;Acc:MGI:2443554]	-	-
ENSMUSG00000006273	1641	2639	2259	2186	2232	1669	2671	2750	2782	2721	2059	1957	2238	1704	2510	Atp6v1b2	8	69088646	69113711	+	5305	protein_coding	ATPase, H+ transporting, lysosomal V1 subunit B2 [Source:MGI Symbol;Acc:MGI:109618]	-	-
ENSMUSG00000040459	832	1865	1650	1825	2695	3242	2202	2389	2308	2439	1070	3155	3070	2879	2392	Arglu1	8	8665075	8690521	-	5477	protein_coding	arginine and glutamate rich 1 [Source:MGI Symbol;Acc:MGI:2442985]	-	-
ENSMUSG00000040054	2359	2121	1886	1889	2218	2107	2849	3037	2758	2774	2227	1943	1730	2021	2092	Baz2a	10	128091577	128129303	+	10730	protein_coding	bromodomain adjacent to zinc finger domain, 2A [Source:MGI Symbol;Acc:MGI:2151152]	DDT	DDT
ENSMUSG00000031865	2913	2334	1971	1826	1987	2145	2831	2675	2884	2455	2587	1756	1560	1858	2201	Dctn1	6	83165920	83200117	+	6509	protein_coding	dynactin 1 [Source:MGI Symbol;Acc:MGI:107745]	-	-
ENSMUSG00000032431	1734	2527	1944	1963	2221	2420	2729	2534	2826	2642	1416	1847	2211	2259	2706	Crtap	9	114375134	114390675	-	1772	protein_coding	cartilage associated protein [Source:MGI Symbol;Acc:MGI:1891221]	-	-
ENSMUSG00000030967	3651	1875	2846	2054	2355	2006	1849	1786	1723	1945	2529	2040	2597	2447	2210	Zranb1	7	132931142	132986391	+	5472	protein_coding	zinc finger, RAN-binding domain containing 1 [Source:MGI Symbol;Acc:MGI:106441]	-	-
ENSMUSG00000021215	2003	2269	2631	2698	2487	1440	1774	2478	1739	2699	2087	2069	1841	2947	2725	Net1	13	3882018	3918220	-	5217	protein_coding	neuroepithelial cell transforming gene 1 [Source:MGI Symbol;Acc:MGI:1927138]	-	-
ENSMUSG00000027660	1636	1876	3213	3906	2240	1090	2367	2052	2621	2154	3247	2229	1929	1696	1595	Skil	3	31095058	31122577	+	9694	protein_coding	SKI-like [Source:MGI Symbol;Acc:MGI:106203]	-	-
ENSMUSG00000028809	1566	2286	1927	2219	2338	2159	2327	2580	2301	2348	2340	2332	2088	2424	2594	Srrm1	4	135320484	135353321	-	7299	protein_coding	serine/arginine repetitive matrix 1 [Source:MGI Symbol;Acc:MGI:1858303]	-	-
ENSMUSG00000022799	2695	1911	1822	2309	2162	936	1560	1630	1456	1507	3996	3143	2498	2282	3895	Arhgap31	16	38598340	38713274	-	11141	protein_coding	Rho GTPase activating protein 31 [Source:MGI Symbol;Acc:MGI:1333857]	-	-
ENSMUSG00000005846	1689	2728	2402	2587	2070	2008	1794	2023	1841	2095	1795	2303	2847	2795	2808	Rsl1d1	16	11192970	11203331	-	2258	protein_coding	ribosomal L1 domain containing 1 [Source:MGI Symbol;Acc:MGI:1913659]	-	-
ENSMUSG00000024870	1977	2185	2153	1882	2497	2551	2613	2676	2656	2663	2217	1949	1708	1856	2165	Rab1b	19	5099207	5106996	-	1835	protein_coding	RAB1B, member RAS oncogene family [Source:MGI Symbol;Acc:MGI:1923558]	-	-
ENSMUSG00000048612	1711	2205	2415	2638	2723	1229	2641	2479	2762	1903	3061	2026	2133	1696	2082	Myof	19	37899036	38043577	-	12603	protein_coding	myoferlin [Source:MGI Symbol;Acc:MGI:1919192]	-	-
ENSMUSG00000041638	3016	2274	2110	1709	2228	1761	2448	2482	2298	2401	3183	1904	1791	1671	2416	Gcn1l1	5	115565254	115622654	+	17815	protein_coding	GCN1 general control of amino-acid synthesis 1-like 1 (yeast) [Source:MGI Symbol;Acc:MGI:2444248]	-	-
ENSMUSG00000026674	3128	2241	1729	1430	1729	1784	3393	2753	3034	3089	2193	1740	1843	1557	2022	Ddr2	1	169972307	170110762	-	9264	protein_coding	discoidin domain receptor family, member 2 [Source:MGI Symbol;Acc:MGI:1345277]	-	-
ENSMUSG00000028756	2634	1693	2132	1467	2306	2308	2734	2479	2427	2504	2962	2103	2066	1577	2228	Pink1	4	138313409	138326307	-	2673	protein_coding	PTEN induced putative kinase 1 [Source:MGI Symbol;Acc:MGI:1916193]	-	-
ENSMUSG00000026814	2770	2847	2260	2202	2263	2221	2416	2277	2456	2436	1746	1769	1800	2056	2035	Eng	2	32646595	32682669	+	4048	protein_coding	endoglin [Source:MGI Symbol;Acc:MGI:95392]	-	-
ENSMUSG00000057133	2160	1725	2051	1774	2393	1940	2382	2683	2346	2334	2429	2377	2241	2453	2238	Chd6	2	160946978	161109075	-	19093	protein_coding	chromodomain helicase DNA binding protein 6 [Source:MGI Symbol;Acc:MGI:1918639]	SNF2	SNF2
ENSMUSG00000030435	1315	2451	2021	2213	2667	2603	2087	2402	2165	2130	1721	2511	2121	2570	2505	U2af2	7	5062143	5079938	+	4113	protein_coding	U2 small nuclear ribonucleoprotein auxiliary factor (U2AF) 2 [Source:MGI Symbol;Acc:MGI:98886]	-	-
ENSMUSG00000022536	1798	2574	2063	2434	1994	1534	2660	2766	2726	2757	2201	2183	1442	1952	2354	Glyr1	16	5013909	5049863	-	8405	protein_coding	glyoxylate reductase 1 homolog (Arabidopsis) [Source:MGI Symbol;Acc:MGI:1921272]	-	-
ENSMUSG00000051586	2414	1845	2164	1501	2392	2433	2560	3030	2623	2805	2331	1587	2089	1677	1984	Mical3	6	120931707	121130999	-	22950	protein_coding	microtubule associated monooxygenase, calponin and LIM domain containing 3 [Source:MGI Symbol;Acc:MGI:2442733]	Others	Others
ENSMUSG00000031167	1235	2009	2222	2073	2506	2290	2184	2252	1837	2118	2088	2507	2733	2588	2787	Rbm3	X	8138975	8145880	-	4698	protein_coding	RNA binding motif (RNP1, RRM) protein 3 [Source:MGI Symbol;Acc:MGI:1099460]	-	-
ENSMUSG00000041133	2710	2503	2538	2162	1995	1570	2039	1924	2114	2035	2625	2106	1912	2272	2920	Smc1a	X	152016428	152062694	+	5769	protein_coding	structural maintenance of chromosomes 1A [Source:MGI Symbol;Acc:MGI:1344345]	-	-
ENSMUSG00000021279	2129	2215	2047	2151	1845	1458	3175	3204	3010	2699	3021	1877	1255	1516	1814	Cdc42bpb	12	111292976	111377718	-	7375	protein_coding	CDC42 binding protein kinase beta [Source:MGI Symbol;Acc:MGI:2136459]	-	-
ENSMUSG00000022789	1666	2452	2470	2454	2207	1990	1972	2141	1960	2163	2009	2342	2526	2705	2346	Dnm1l	16	16312230	16358959	-	5203	protein_coding	dynamin 1-like [Source:MGI Symbol;Acc:MGI:1921256]	-	-
ENSMUSG00000027365	1923	2053	1805	1958	1844	1714	2875	2623	2446	2719	1885	2316	2089	2468	2669	Trpm7	2	126791565	126876230	-	11315	protein_coding	transient receptor potential cation channel, subfamily M, member 7 [Source:MGI Symbol;Acc:MGI:1929996]	-	-
ENSMUSG00000053617	2893	1867	2001	1319	2145	1643	3074	3109	2757	3038	3152	1469	2058	1153	1695	Sh3pxd2a	19	47260174	47464411	-	10464	protein_coding	SH3 and PX domains 2A [Source:MGI Symbol;Acc:MGI:1298393]	-	-
ENSMUSG00000046671	1803	2319	2250	2002	2333	2250	2192	2213	2291	2219	2202	2024	2459	2232	2567	Mtfr1l	4	134525550	134535387	-	5370	protein_coding	mitochondrial fission regulator 1-like [Source:MGI Symbol;Acc:MGI:1924074]	-	-
ENSMUSG00000021765	1751	1587	3071	3450	6297	119	137	1070	293	164	1326	3840	1993	3572	4672	Fst	13	114452290	114458951	-	4589	protein_coding	follistatin [Source:MGI Symbol;Acc:MGI:95586]	-	-
ENSMUSG00000039153	1904	3978	3265	4828	882	1268	1622	1201	2170	1384	3134	2833	694	3105	1062	Runx2	17	44495987	44814797	-	8837	protein_coding	runt related transcription factor 2 [Source:MGI Symbol;Acc:MGI:99829]	-	-
ENSMUSG00000014349	1829	2107	1933	1901	2107	1790	2652	2921	2755	2579	2516	2089	1931	1750	2457	Ube2z	11	96047432	96065388	-	3997	protein_coding	ubiquitin-conjugating enzyme E2Z [Source:MGI Symbol;Acc:MGI:1343160]	-	-
ENSMUSG00000036503	1700	2435	2206	2083	1665	1766	2880	2952	2856	2919	1652	1906	1993	1976	2323	Rnf13	3	57736062	57835233	+	10019	protein_coding	ring finger protein 13 [Source:MGI Symbol;Acc:MGI:1346341]	-	-
ENSMUSG00000024150	1539	2735	1934	2125	1840	1961	2910	2921	2666	2678	1772	1827	1858	1962	2547	Mcfd2	17	87254658	87265935	-	2612	protein_coding	multiple coagulation factor deficiency 2 [Source:MGI Symbol;Acc:MGI:2183439]	-	-
ENSMUSG00000017774	3107	2445	2125	1697	2169	1482	2809	2653	2738	2357	2571	1828	1636	1636	2014	Myo1c	11	75650504	75673910	+	6585	protein_coding	myosin IC [Source:MGI Symbol;Acc:MGI:106612]	-	-
ENSMUSG00000057880	1709	1463	2039	1579	1789	1980	3249	4227	3142	4380	1538	1525	1400	1178	2046	Abat	16	8513429	8621568	+	7748	protein_coding	4-aminobutyrate aminotransferase [Source:MGI Symbol;Acc:MGI:2443582]	-	-
ENSMUSG00000062933	2804	1152	3643	3545	1157	1410	1649	1855	1687	827	1104	3735	1285	1927	5461	Gm10123	9	96895658	96896147	+	490	processed_pseudogene	predicted pseudogene 10123 [Source:MGI Symbol;Acc:MGI:3704342]	-	-
ENSMUSG00000020936	2315	2389	2607	2108	2047	2066	2366	2596	2306	2483	2215	1955	1665	1844	2279	Nmt1	11	103028190	103068912	+	5017	protein_coding	N-myristoyltransferase 1 [Source:MGI Symbol;Acc:MGI:102579]	-	-
ENSMUSG00000041763	1861	2142	2204	2087	2415	1678	2170	2526	2391	2595	1796	2039	2571	2243	2522	Tpp2	1	43933647	44003000	+	10078	protein_coding	tripeptidyl peptidase II [Source:MGI Symbol;Acc:MGI:102724]	-	-
ENSMUSG00000060510	2419	2335	2435	2350	2164	1389	2063	2096	2061	2187	2582	2638	1845	2226	2432	Zfp266	9	20495068	20521417	-	7033	protein_coding	zinc finger protein 266 [Source:MGI Symbol;Acc:MGI:1924769]	C2H2	C2H2
ENSMUSG00000021012	2218	2205	2617	2083	2280	1259	1872	1932	1802	1827	2560	2316	2830	2692	2725	Zc3h14	12	98746964	98787753	+	7891	protein_coding	zinc finger CCCH type containing 14 [Source:MGI Symbol;Acc:MGI:1919824]	-	-
ENSMUSG00000025969	2676	2301	1566	1380	1667	2068	3677	3318	3296	2617	1826	1713	1511	1632	1942	Nrp2	1	62703285	62818695	+	11842	protein_coding	neuropilin 2 [Source:MGI Symbol;Acc:MGI:1100492]	-	-
ENSMUSG00000022893	7087	5939	854	875	1012	406	603	801	581	726	645	1435	820	7382	4004	Adamts1	16	85793827	85803113	-	5302	protein_coding	a disintegrin-like and metallopeptidase (reprolysin type) with thrombospondin type 1 motif, 1 [Source:MGI Symbol;Acc:MGI:109249]	-	-
ENSMUSG00000033237	2399	2001	2144	2180	2238	1464	2307	2266	2165	2121	2551	2376	2351	2209	2327	Arid2	15	96287518	96404992	+	10737	protein_coding	AT rich interactive domain 2 (ARID, RFX-like) [Source:MGI Symbol;Acc:MGI:1924294]	ARID	ARID
ENSMUSG00000027782	1941	2340	2285	2161	2048	1321	2341	2500	2560	2353	2270	2006	2286	1988	2685	Kpna4	3	69067149	69127113	-	8940	protein_coding	karyopherin (importin) alpha 4 [Source:MGI Symbol;Acc:MGI:1100848]	-	-
ENSMUSG00000024639	2240	2260	2481	2268	1913	1150	2322	2645	2520	2575	3209	2193	1627	1590	2092	Gnaq	19	16132831	16387463	+	6185	protein_coding	guanine nucleotide binding protein, alpha q polypeptide [Source:MGI Symbol;Acc:MGI:95776]	-	-
ENSMUSG00000061353	3253	2005	2124	1571	1196	1772	2257	1856	2239	2130	3052	4992	1484	1502	1637	Cxcl12	6	117168535	117181367	+	8176	protein_coding	chemokine (C-X-C motif) ligand 12 [Source:MGI Symbol;Acc:MGI:103556]	-	-
ENSMUSG00000033059	2506	2056	2044	1746	1758	1235	2100	1838	1821	1716	5541	2100	2060	1959	2587	Pygb	2	150786735	150831758	+	4809	protein_coding	brain glycogen phosphorylase [Source:MGI Symbol;Acc:MGI:97828]	-	-
ENSMUSG00000031948	2627	2609	2244	2248	1985	1857	1863	1911	1886	1887	2568	2116	2234	2166	2850	Kars	8	111993443	112011323	-	4464	protein_coding	lysyl-tRNA synthetase [Source:MGI Symbol;Acc:MGI:1934754]	-	-
ENSMUSG00000042406	910	2612	1516	2314	2382	2913	2411	2593	2251	2848	1108	2069	2469	2514	2112	Atf4	15	80255184	80257541	+	2358	protein_coding	activating transcription factor 4 [Source:MGI Symbol;Acc:MGI:88096]	bZIP	bZIP
ENSMUSG00000029705	2598	2448	2471	2120	2311	1612	1975	1996	2243	2006	2530	1850	1891	2333	2637	Cux1	5	136248135	136567490	-	20024	protein_coding	cut-like homeobox 1 [Source:MGI Symbol;Acc:MGI:88568]	-	-
ENSMUSG00000037573	1165	2330	1672	2193	1931	2103	3005	3748	3032	4048	1054	1198	1745	1713	2066	Tob1	11	94211454	94215495	+	2288	protein_coding	transducer of ErbB-2.1 [Source:MGI Symbol;Acc:MGI:1349721]	-	-
ENSMUSG00000027198	2005	2335	2283	1954	2563	1830	2463	2111	2310	2160	2063	2214	1929	2152	2627	Ext2	2	93661028	93822568	-	7328	protein_coding	exostoses (multiple) 2 [Source:MGI Symbol;Acc:MGI:108050]	-	-
ENSMUSG00000059119	1750	2315	2280	2132	2393	1928	2185	2389	2132	2254	2090	2142	2197	2139	2596	Nap1l4	7	143513579	143549106	-	3094	protein_coding	nucleosome assembly protein 1-like 4 [Source:MGI Symbol;Acc:MGI:1316687]	-	-
ENSMUSG00000031902	2545	2290	2307	1813	1802	1250	2498	2857	2318	2737	2577	1869	1770	1907	2367	Nfatc3	8	106058840	106130537	+	11726	protein_coding	nuclear factor of activated T cells, cytoplasmic, calcineurin dependent 3 [Source:MGI Symbol;Acc:MGI:103296]	-	-
ENSMUSG00000024620	2341	2355	2198	1709	2173	1906	2729	2418	3066	2290	2244	2094	1585	1787	1925	Pdgfrb	18	61045150	61085061	+	5478	protein_coding	platelet derived growth factor receptor, beta polypeptide [Source:MGI Symbol;Acc:MGI:97531]	-	-
ENSMUSG00000035545	1175	1611	1558	1463	3350	3905	2356	2370	2285	2314	1090	2393	2318	2783	1833	Leng8	7	4137039	4148177	+	6395	protein_coding	leukocyte receptor cluster (LRC) member 8 [Source:MGI Symbol;Acc:MGI:2142195]	-	-
ENSMUSG00000109336	2423	2123	2118	1802	2227	2024	2446	2654	2637	2550	2309	1815	1946	1690	2018	Samd4b	7	28399522	28598144	-	4672	protein_coding	sterile alpha motif domain containing 4B [Source:MGI Symbol;Acc:MGI:2448542]	-	-
ENSMUSG00000027566	1650	2518	2300	2641	2331	2501	1808	1969	1822	2039	1780	2190	2196	2333	2703	Psma7	2	180036374	180042433	-	3071	protein_coding	proteasome (prosome, macropain) subunit, alpha type 7 [Source:MGI Symbol;Acc:MGI:1347070]	-	-
ENSMUSG00000032301	1628	2559	2309	2409	2190	2372	1840	2068	2160	2019	1375	2215	2114	2842	2680	Psma4	9	54950790	54958030	+	2370	protein_coding	proteasome (prosome, macropain) subunit, alpha type 4 [Source:MGI Symbol;Acc:MGI:1347060]	-	-
ENSMUSG00000015568	2981	1509	2869	2748	1788	1041	1751	1035	1170	1404	3966	2378	3188	2100	2850	Lpl	8	68880491	68907448	+	10478	protein_coding	lipoprotein lipase [Source:MGI Symbol;Acc:MGI:96820]	-	-
ENSMUSG00000037013	1391	2150	2138	2228	2749	1662	2340	2538	2519	2200	1870	2346	2253	2010	2373	Ss18	18	14624198	14682914	-	4523	protein_coding	SS18, nBAF chromatin remodeling complex subunit [Source:MGI Symbol;Acc:MGI:107708]	-	-
ENSMUSG00000022811	2286	2275	2141	2144	1735	1418	2640	2723	2457	2793	2530	2019	1720	1790	2086	Zfp148	16	33380836	33504363	+	10383	protein_coding	zinc finger protein 148 [Source:MGI Symbol;Acc:MGI:1332234]	C2H2	C2H2
ENSMUSG00000076431	3536	1619	2823	2102	1956	873	1868	1855	2175	1880	6369	2227	990	991	1475	Sox4	13	28948919	28953713	-	4795	protein_coding	SRY (sex determining region Y)-box 4 [Source:MGI Symbol;Acc:MGI:98366]	HMG	HMG
ENSMUSG00000029202	1991	2354	2083	2111	2027	1484	2257	2239	2508	2321	2680	2155	1923	2219	2354	Pds5a	5	65605721	65698273	-	19335	protein_coding	PDS5 cohesin associated factor A [Source:MGI Symbol;Acc:MGI:1918771]	-	-
ENSMUSG00000020376	1371	1770	1863	1741	2106	1963	3049	3819	3044	3510	1558	1941	1847	1040	2081	Rnf130	11	50025346	50104758	+	1558	protein_coding	ring finger protein 130 [Source:MGI Symbol;Acc:MGI:1891717]	-	-
ENSMUSG00000040481	2723	2219	1857	1830	1716	1329	2756	2811	2570	2594	2887	2048	1490	1788	2083	Bptf	11	107033081	107132127	-	14081	protein_coding	bromodomain PHD finger transcription factor [Source:MGI Symbol;Acc:MGI:2444008]	DDT	DDT
ENSMUSG00000034858	1442	1984	1820	1920	2375	2622	2286	2460	2691	2600	1411	2218	2472	2150	2225	Fam214a	9	74952884	75032468	+	6637	protein_coding	family with sequence similarity 214, member A [Source:MGI Symbol;Acc:MGI:2387648]	-	-
ENSMUSG00000032572	1870	1189	2195	1550	2867	2154	2543	2947	2808	2359	2005	2287	2417	1256	2227	Col6a4	9	105989454	106096783	-	8526	protein_coding	collagen, type VI, alpha 4 [Source:MGI Symbol;Acc:MGI:1915803]	-	-
ENSMUSG00000006369	2084	2337	2379	2197	4123	709	1130	1192	1152	919	2109	2862	2497	2807	4173	Fbln1	15	85205949	85286535	+	4368	protein_coding	fibulin 1 [Source:MGI Symbol;Acc:MGI:95487]	-	-
ENSMUSG00000013076	3717	1908	1891	1567	1513	1553	2937	2575	2653	2651	3064	1593	1577	1419	2048	Amotl1	9	14541966	14645056	-	10064	protein_coding	angiomotin-like 1 [Source:MGI Symbol;Acc:MGI:1922973]	-	-
ENSMUSG00000060904	1711	2480	2150	2146	2126	1795	2283	2365	2205	2386	1685	2085	2521	2191	2529	Arl1	10	88730858	88744094	+	2369	protein_coding	ADP-ribosylation factor-like 1 [Source:MGI Symbol;Acc:MGI:99436]	-	-
ENSMUSG00000058454	1802	4679	2810	3914	1297	1718	1841	2327	1777	2325	1509	1607	749	2742	1544	Dhcr7	7	143823145	143848410	+	5817	protein_coding	7-dehydrocholesterol reductase [Source:MGI Symbol;Acc:MGI:1298378]	-	-
ENSMUSG00000035168	2318	1942	2151	2290	3020	1136	1676	1599	1677	1577	2990	2710	2044	2410	3089	Tanc1	2	59612042	59846149	+	14570	protein_coding	tetratricopeptide repeat, ankyrin repeat and coiled-coil containing 1 [Source:MGI Symbol;Acc:MGI:1914110]	-	-
ENSMUSG00000021978	2430	1841	1685	1562	1930	1649	3184	2974	2777	2614	2728	1838	1856	1454	2099	Extl3	14	65052060	65149855	-	6063	protein_coding	exostoses (multiple)-like 3 [Source:MGI Symbol;Acc:MGI:1860765]	-	-
ENSMUSG00000029992	2471	1994	2285	1869	1966	1063	2268	2685	2248	2646	3070	2049	1867	1669	2463	Gfpt1	6	87042846	87092197	+	10072	protein_coding	glutamine fructose-6-phosphate transaminase 1 [Source:MGI Symbol;Acc:MGI:95698]	-	-
ENSMUSG00000030753	1834	2424	2169	2195	1658	1287	2828	2630	2674	2613	2443	1972	1731	1895	2251	Thap12	7	98703103	98718062	+	4125	protein_coding	THAP domain containing 12 [Source:MGI Symbol;Acc:MGI:1920231]	-	-
ENSMUSG00000070923	2282	2249	2466	2070	1771	1182	2239	2299	2257	2589	3108	2013	1946	1838	2291	Klhl9	4	88718292	88722465	-	4174	protein_coding	kelch-like 9 [Source:MGI Symbol;Acc:MGI:2180122]	-	-
ENSMUSG00000027162	1958	2252	2237	2254	1858	1251	2487	2687	2457	2703	2569	2001	1839	1769	2269	Lin7c	2	109890853	109901003	+	4521	protein_coding	lin-7 homolog C (C. elegans) [Source:MGI Symbol;Acc:MGI:1330839]	-	-
ENSMUSG00000038708	2401	1976	1872	1730	2085	1517	2735	2930	2613	2563	2722	1856	1750	1924	1907	Golga4	9	118506267	118582519	+	13602	protein_coding	golgi autoantigen, golgin subfamily a, 4 [Source:MGI Symbol;Acc:MGI:1859646]	-	-
ENSMUSG00000024474	1838	2335	2309	2018	2216	2092	1883	2087	2119	2226	1911	2150	2111	2576	2696	Ik	18	36744656	36757639	+	1996	protein_coding	IK cytokine [Source:MGI Symbol;Acc:MGI:1345142]	-	-
ENSMUSG00000067194	1881	2449	2296	2252	1916	1502	2492	2553	2307	2484	2013	2078	1777	2084	2481	Eif1ax	X	159372178	159389928	+	5266	protein_coding	eukaryotic translation initiation factor 1A, X-linked [Source:MGI Symbol;Acc:MGI:1913485]	-	-
ENSMUSG00000031392	1618	2169	2040	2128	1937	1970	2995	2622	2888	2551	1931	1929	1695	1865	2225	Irak1	X	74013914	74023918	-	4716	protein_coding	interleukin-1 receptor-associated kinase 1 [Source:MGI Symbol;Acc:MGI:107420]	-	-
ENSMUSG00000031284	1472	907	1704	1055	2266	2213	2621	5535	2506	5115	1102	1384	1369	1007	2282	Pak3	X	143518591	143797796	+	9552	protein_coding	p21 (RAC1) activated kinase 3 [Source:MGI Symbol;Acc:MGI:1339656]	-	-
ENSMUSG00000005514	1801	2135	1660	1370	1724	2359	3150	3730	2941	3014	1936	1388	1394	1812	2108	Por	5	135670033	135735326	+	4021	protein_coding	P450 (cytochrome) oxidoreductase [Source:MGI Symbol;Acc:MGI:97744]	-	-
ENSMUSG00000031357	1544	2307	2218	2225	1888	1905	2383	2656	2351	2715	1526	2065	2057	2287	2388	Syap1	X	162857057	162888447	-	2351	protein_coding	synapse associated protein 1 [Source:MGI Symbol;Acc:MGI:1914293]	-	-
ENSMUSG00000066357	1672	1564	2104	1534	2119	1821	2848	3047	2818	2680	3215	1714	1544	1575	2234	Wdr6	9	108572311	108578739	-	4163	protein_coding	WD repeat domain 6 [Source:MGI Symbol;Acc:MGI:1930140]	-	-
ENSMUSG00000022957	1982	2123	1768	1935	2399	1612	2117	2265	2164	2222	1843	2633	2491	2008	2899	Itsn1	16	91729281	91920597	+	23425	protein_coding	intersectin 1 (SH3 domain protein 1A) [Source:MGI Symbol;Acc:MGI:1338069]	-	-
ENSMUSG00000105987	2111	3111	2074	1889	2204	1728	1937	2219	2631	2408	1454	1819	1573	2607	2682	AI506816	5	23698296	23712667	-	4479	processed_transcript	expressed sequence AI506816 [Source:MGI Symbol;Acc:MGI:2140929]	-	-
ENSMUSG00000028412	2328	2241	2271	2271	1703	1413	2564	2500	2441	2537	2506	1829	1842	1768	2207	Slc44a1	4	53440413	53622478	+	6945	protein_coding	solute carrier family 44, member 1 [Source:MGI Symbol;Acc:MGI:2140592]	-	-
ENSMUSG00000060227	1694	2016	2337	2138	1923	1381	2423	2726	2408	2408	2193	2212	2176	1852	2531	Casc4	2	121866970	121936220	+	5858	protein_coding	cancer susceptibility candidate 4 [Source:MGI Symbol;Acc:MGI:2443129]	-	-
ENSMUSG00000024583	1473	2531	2183	2707	2475	1491	1652	1873	1722	1831	1674	2576	2304	2620	3306	Txnl1	18	63662801	63692359	-	2558	protein_coding	thioredoxin-like 1 [Source:MGI Symbol;Acc:MGI:1860078]	-	-
ENSMUSG00000068036	2315	1811	2205	2063	2570	1715	2002	2229	2080	2086	2572	2214	2197	2003	2331	Afdn	17	13760539	13906150	+	10223	protein_coding	afadin, adherens junction formation factor [Source:MGI Symbol;Acc:MGI:1314653]	-	-
ENSMUSG00000021754	3400	2274	2240	2077	1198	1742	2919	2126	2301	2330	3100	1625	1488	1831	1740	Map3k1	13	111746428	111808993	-	7447	protein_coding	mitogen-activated protein kinase kinase kinase 1 [Source:MGI Symbol;Acc:MGI:1346872]	-	-
ENSMUSG00000027180	1627	2265	2090	2089	2008	1815	2306	2679	2560	2626	1704	2155	2008	2042	2392	Fbxo3	2	104027721	104063240	+	7237	protein_coding	F-box protein 3 [Source:MGI Symbol;Acc:MGI:1929084]	-	-
ENSMUSG00000005371	1326	2072	2140	2056	2166	1687	2407	2626	2386	2426	2001	2289	2309	2230	2229	Fbxo11	17	87990859	88065291	-	4144	protein_coding	F-box protein 11 [Source:MGI Symbol;Acc:MGI:2147134]	-	-
ENSMUSG00000020817	1608	1972	1865	1444	2557	1949	3074	2793	3582	3063	1650	1488	1874	1636	1789	Rabep1	11	70844778	70943105	+	6868	protein_coding	rabaptin, RAB GTPase binding effector protein 1 [Source:MGI Symbol;Acc:MGI:1860236]	-	-
ENSMUSG00000038467	1341	2266	1967	2039	2333	2147	2762	2488	2484	2401	1752	1917	1857	2023	2537	Chmp4b	2	154651705	154694785	+	2027	protein_coding	charged multivesicular body protein 4B [Source:MGI Symbol;Acc:MGI:1922858]	-	-
ENSMUSG00000020340	2248	2721	3225	3984	1952	592	1083	1111	1158	933	4054	3080	1635	2567	1965	Cyfip2	11	46193850	46312859	-	7103	protein_coding	cytoplasmic FMR1 interacting protein 2 [Source:MGI Symbol;Acc:MGI:1924134]	-	-
ENSMUSG00000024187	2095	2219	2486	2000	2752	1582	1876	2110	1837	1897	2153	2206	2043	2195	2847	Fam234a	17	26211822	26244223	-	3981	protein_coding	family with sequence similarity 234, member A [Source:MGI Symbol;Acc:MGI:2146854]	-	-
ENSMUSG00000006299	1591	1860	1982	1706	2461	2975	2367	2666	2417	2807	1702	1968	1736	2083	1966	Aamp	1	74279840	74284738	-	3458	protein_coding	angio-associated migratory protein [Source:MGI Symbol;Acc:MGI:107809]	-	-
ENSMUSG00000026526	1789	2243	2363	2259	2029	2018	1896	2190	1962	2177	1820	2169	2164	2506	2662	Fh1	1	175600374	175625635	-	3392	protein_coding	fumarate hydratase 1 [Source:MGI Symbol;Acc:MGI:95530]	-	-
ENSMUSG00000021178	2178	2409	2301	2393	1978	1920	2024	2239	2156	2103	2270	2048	1687	2243	2272	Psmc1	12	100110154	100123405	+	1933	protein_coding	protease (prosome, macropain) 26S subunit, ATPase 1 [Source:MGI Symbol;Acc:MGI:106054]	-	-
ENSMUSG00000033596	2731	1939	2013	1933	1778	1317	2328	2580	2351	2519	2352	2014	1551	1977	2799	Rfwd3	8	111270944	111300222	-	6937	protein_coding	ring finger and WD repeat domain 3 [Source:MGI Symbol;Acc:MGI:2384584]	-	-
ENSMUSG00000046785	1657	2283	1947	2076	1921	1596	2338	2473	2544	2575	2112	2284	1843	2307	2220	Epm2aip1	9	111271929	111279093	+	7165	protein_coding	EPM2A (laforin) interacting protein 1 [Source:MGI Symbol;Acc:MGI:1925031]	-	-
ENSMUSG00000033444	2216	1971	2127	1742	1916	1564	2538	2729	2387	2628	2988	1994	1552	1702	2119	Specc1l	10	75212073	75312743	+	13265	protein_coding	sperm antigen with calponin homology and coiled-coil domains 1-like [Source:MGI Symbol;Acc:MGI:1921642]	-	-
ENSMUSG00000007872	1132	2235	1878	2129	4825	2059	1813	2002	1916	1519	1088	2231	2195	2269	2864	Id3	4	136143497	136145755	+	1791	protein_coding	inhibitor of DNA binding 3 [Source:MGI Symbol;Acc:MGI:96398]	bHLH	bHLH
ENSMUSG00000003402	1717	2350	2162	2037	2564	2122	2078	2119	2147	2103	1955	2166	1949	2303	2355	Prkcsh	9	22002806	22014222	+	4275	protein_coding	protein kinase C substrate 80K-H [Source:MGI Symbol;Acc:MGI:107877]	-	-
ENSMUSG00000028522	1582	1875	2202	1866	2149	1784	2313	2581	2352	2695	2061	2253	2331	1848	2203	Mier1	4	103114390	103165754	+	12513	protein_coding	MEIR1 treanscription regulator [Source:MGI Symbol;Acc:MGI:1918398]	-	-
ENSMUSG00000053565	1801	2370	2485	2314	2151	2166	1700	1819	1739	1827	1977	2182	2461	2110	2928	Eif3k	7	28971372	28981864	-	2698	protein_coding	eukaryotic translation initiation factor 3, subunit K [Source:MGI Symbol;Acc:MGI:1921080]	-	-
ENSMUSG00000031508	1005	2007	1684	1791	2228	3148	2304	2256	2415	2326	1299	2265	2553	2516	2229	Ankrd10	8	11611583	11635757	-	7492	protein_coding	ankyrin repeat domain 10 [Source:MGI Symbol;Acc:MGI:1921840]	-	-
ENSMUSG00000001751	1510	1860	1938	1586	3076	2640	2526	3112	2601	2924	1202	1591	1425	1638	2393	Naglu	11	101070012	101077672	+	2658	protein_coding	alpha-N-acetylglucosaminidase (Sanfilippo disease IIIB) [Source:MGI Symbol;Acc:MGI:1351641]	-	-
ENSMUSG00000020864	2016	2708	2186	2034	2175	1779	2263	2014	2298	2046	1880	2043	1911	2283	2367	Ankrd40	11	94328001	94341841	+	4255	protein_coding	ankyrin repeat domain 40 [Source:MGI Symbol;Acc:MGI:1918702]	-	-
ENSMUSG00000022091	1901	2310	1883	1932	1821	3316	2614	2456	2171	2744	1420	1663	1342	2416	1991	Sorbs3	14	70180468	70211989	-	3630	protein_coding	sorbin and SH3 domain containing 3 [Source:MGI Symbol;Acc:MGI:700013]	-	-
ENSMUSG00000043252	1822	2183	2006	2100	1894	1174	2541	2711	2746	2507	2484	2119	1704	1643	2343	Tmem64	4	15265831	15286753	+	4670	protein_coding	transmembrane protein 64 [Source:MGI Symbol;Acc:MGI:2140359]	-	-
ENSMUSG00000025609	1964	2295	2131	2093	1800	1591	2378	2462	2422	2503	1990	1994	1998	2089	2267	Mkln1	6	31398735	31516811	+	28943	protein_coding	muskelin 1, intracellular mediator containing kelch motifs [Source:MGI Symbol;Acc:MGI:1351638]	-	-
ENSMUSG00000020388	1606	1780	2538	2798	3161	2583	1690	2227	2261	2210	1986	2084	1708	1742	1602	Pdlim4	11	54054928	54069014	-	2560	protein_coding	PDZ and LIM domain 4 [Source:MGI Symbol;Acc:MGI:1353470]	Others	Others
ENSMUSG00000039982	4058	2098	2476	1376	2265	962	1903	1820	2020	1810	2167	1993	2753	1771	2495	Dtx4	19	12466341	12501996	-	5765	protein_coding	deltex 4, E3 ubiquitin ligase [Source:MGI Symbol;Acc:MGI:2672905]	-	-
ENSMUSG00000060636	1516	1995	1911	2206	2677	2736	2284	2187	1901	2158	1562	2476	1898	1937	2509	Rpl35a	16	33056453	33060189	+	3526	protein_coding	ribosomal protein L35A [Source:MGI Symbol;Acc:MGI:1928894]	-	-
ENSMUSG00000021814	1855	2335	1973	1858	1990	1896	2282	2259	2492	2241	2050	2028	2240	2052	2376	Anxa7	14	20455260	20480133	-	5991	protein_coding	annexin A7 [Source:MGI Symbol;Acc:MGI:88031]	-	-
ENSMUSG00000002980	1500	1883	1569	1070	1550	3088	3763	2747	2931	3165	2945	1369	1498	1371	1477	Bcam	7	19756131	19771016	-	3199	protein_coding	basal cell adhesion molecule [Source:MGI Symbol;Acc:MGI:1929940]	-	-
ENSMUSG00000040128	2060	2146	2050	2004	2587	2178	1886	2103	2197	2057	1999	2061	2492	2047	2041	Pnrc1	4	33245423	33290163	-	2095	protein_coding	proline-rich nuclear receptor coactivator 1 [Source:MGI Symbol;Acc:MGI:1917838]	-	-
ENSMUSG00000027680	1850	2345	2236	2490	1983	1383	1959	1962	1957	2034	2354	2328	2254	2227	2509	Fxr1	3	34019943	34070322	+	6553	protein_coding	fragile X mental retardation gene 1, autosomal homolog [Source:MGI Symbol;Acc:MGI:104860]	-	-
ENSMUSG00000038664	2631	1914	1863	1694	2079	1626	2544	2760	2569	2618	2434	2015	1570	1569	1976	Herc1	9	66350450	66508775	+	27464	protein_coding	HECT and RLD domain containing E3 ubiquitin protein ligase family member 1 [Source:MGI Symbol;Acc:MGI:2384589]	-	-
ENSMUSG00000038095	2094	2148	2009	1904	2110	1620	2166	2383	2321	2437	2284	2187	1757	2191	2242	Sbno1	5	124368702	124426001	-	19933	protein_coding	strawberry notch 1 [Source:MGI Symbol;Acc:MGI:2384298]	-	-
ENSMUSG00000071337	1141	2047	1740	2015	2625	2607	1807	1757	1859	2197	1048	2594	2700	3192	2511	Tia1	6	86404219	86433405	+	15750	protein_coding	cytotoxic granule-associated RNA binding protein 1 [Source:MGI Symbol;Acc:MGI:107914]	-	-
ENSMUSG00000027589	1536	1941	1828	1844	1928	1985	2476	2643	2570	2345	1473	2281	2016	2447	2510	Pcmtd2	2	181837854	181857461	+	4183	protein_coding	protein-L-isoaspartate (D-aspartate) O-methyltransferase domain containing 2 [Source:MGI Symbol;Acc:MGI:1923927]	-	-
ENSMUSG00000014195	1456	2110	1962	2011	2393	2543	1943	2072	2024	2239	1582	2276	2201	2704	2263	Dnajc7	11	100582818	100620168	-	4863	protein_coding	DnaJ heat shock protein family (Hsp40) member C7 [Source:MGI Symbol;Acc:MGI:1928373]	-	-
ENSMUSG00000026112	1760	2607	2249	2270	1652	1472	2245	2484	2472	2328	2014	2086	1953	1920	2262	Coa5	1	37417084	37430103	-	5220	protein_coding	cytochrome C oxidase assembly factor 5 [Source:MGI Symbol;Acc:MGI:1923428]	-	-
ENSMUSG00000032314	1284	2031	1906	1929	2048	1602	2656	2836	2831	2776	1746	2175	1575	1831	2529	Etfa	9	55454508	55512243	-	1835	protein_coding	electron transferring flavoprotein, alpha polypeptide [Source:MGI Symbol;Acc:MGI:106092]	-	-
ENSMUSG00000029163	1908	2027	1848	1328	2562	2887	3058	2564	2901	2513	1935	1484	1654	1292	1792	Emilin1	5	30913402	30921277	+	4937	protein_coding	elastin microfibril interfacer 1 [Source:MGI Symbol;Acc:MGI:1926189]	-	-
ENSMUSG00000042942	2133	1792	2688	2078	3996	1527	1643	1822	1506	1534	1576	2529	2132	2220	2567	Greb1l	18	10325177	10562934	+	11016	protein_coding	growth regulation by estrogen in breast cancer-like [Source:MGI Symbol;Acc:MGI:3576497]	-	-
ENSMUSG00000024598	1603	1298	1631	2005	2316	1532	2204	2117	2839	1684	2980	3128	2937	1262	2206	Fbn2	18	58008623	58209926	-	10480	protein_coding	fibrillin 2 [Source:MGI Symbol;Acc:MGI:95490]	-	-
ENSMUSG00000032745	1811	2236	2147	2373	1992	1293	1983	2320	2102	2131	2085	2238	2223	2234	2542	Gpbp1	13	111425680	111490111	-	3905	protein_coding	GC-rich promoter binding protein 1 [Source:MGI Symbol;Acc:MGI:1920524]	-	-
ENSMUSG00000025492	882	2720	2415	2033	1776	3211	2158	1618	1649	1963	2399	1566	3699	1646	1938	Ifitm3	7	141009586	141010770	-	678	protein_coding	interferon induced transmembrane protein 3 [Source:MGI Symbol;Acc:MGI:1913391]	-	-
ENSMUSG00000054455	1824	2078	1989	1607	2013	2106	2803	3007	2730	2884	1842	1592	1678	1624	1880	Vapb	2	173737511	173784336	+	7131	protein_coding	vesicle-associated membrane protein, associated protein B and C [Source:MGI Symbol;Acc:MGI:1928744]	-	-
ENSMUSG00000026924	2234	2092	1888	1667	2024	1509	2676	2668	2365	2531	2668	1732	1540	1824	2225	Sec16a	2	26409431	26445216	-	9189	protein_coding	SEC16 homolog A, endoplasmic reticulum export factor [Source:MGI Symbol;Acc:MGI:2139207]	-	-
ENSMUSG00000045636	1535	1920	2082	1722	1477	1473	2683	2117	3241	2002	3312	2158	1842	2177	1896	Mtus1	8	40990914	41133726	-	10078	protein_coding	mitochondrial tumor suppressor 1 [Source:MGI Symbol;Acc:MGI:2142572]	-	-
ENSMUSG00000041236	2212	1886	2159	1823	1888	1696	2161	2366	2231	2537	2206	1870	2214	2031	2349	Vps41	13	18717286	18866811	+	6728	protein_coding	VPS41 HOPS complex subunit [Source:MGI Symbol;Acc:MGI:1929215]	-	-
ENSMUSG00000005442	2580	1994	1504	1512	1992	1702	3059	2940	2851	2469	2567	1743	1458	1428	1828	Cic	7	25267704	25294159	+	10294	protein_coding	capicua transcriptional repressor [Source:MGI Symbol;Acc:MGI:1918972]	HMG	HMG
ENSMUSG00000033420	1491	1914	1810	1681	1824	1460	2979	2503	2904	2426	2167	1980	2313	1689	2476	Antxr1	6	87133853	87335821	-	9537	protein_coding	anthrax toxin receptor 1 [Source:MGI Symbol;Acc:MGI:1916788]	-	-
ENSMUSG00000002778	1478	2395	2107	1981	2090	1967	2059	2058	2178	2112	2088	2184	2263	2057	2599	Kdelr1	7	45872772	45883732	+	1874	protein_coding	KDEL (Lys-Asp-Glu-Leu) endoplasmic reticulum protein retention receptor 1 [Source:MGI Symbol;Acc:MGI:1915387]	-	-
ENSMUSG00000067038	1705	2353	2379	2174	2137	2165	1705	1538	1733	1713	1829	1888	3183	2055	3048	Rps12-ps3	19	59322290	59322783	+	494	protein_coding	ribosomal protein S12, pseudogene 3 [Source:MGI Symbol;Acc:MGI:3704503]	-	-
ENSMUSG00000025743	2123	2518	2581	2409	2745	1191	2069	1648	1940	1629	3057	2167	1391	2192	1898	Sdc3	4	130792537	130826319	+	5989	protein_coding	syndecan 3 [Source:MGI Symbol;Acc:MGI:1349163]	-	-
ENSMUSG00000024587	1594	2500	2192	1955	1824	1563	2284	2522	2311	2400	2011	1964	2049	2001	2388	Nars	18	64499665	64516557	-	2632	protein_coding	asparaginyl-tRNA synthetase [Source:MGI Symbol;Acc:MGI:1917473]	-	-
ENSMUSG00000033880	1334	2058	2287	1883	2265	2132	2673	2943	2906	3179	1698	1391	1634	1410	1747	Lgals3bp	11	118392751	118402092	-	2847	protein_coding	lectin, galactoside-binding, soluble, 3 binding protein [Source:MGI Symbol;Acc:MGI:99554]	-	-
ENSMUSG00000048701	2538	1955	2081	1688	1902	1543	2262	2385	2528	2123	2822	2359	1650	1805	1884	Ccdc6	10	70097121	70193200	+	6385	protein_coding	coiled-coil domain containing 6 [Source:MGI Symbol;Acc:MGI:1923801]	-	-
ENSMUSG00000020263	1162	2101	1456	1567	1870	2715	2537	2287	2651	2724	1590	2153	1994	2522	2193	Appl2	10	83600033	83648738	-	5949	protein_coding	adaptor protein, phosphotyrosine interaction, PH domain and leucine zipper containing 2 [Source:MGI Symbol;Acc:MGI:2384914]	-	-
ENSMUSG00000026970	2218	1920	2260	2004	2489	1816	2024	2091	1852	1958	1913	2105	2343	2300	2220	Rbms1	2	60750193	60963192	-	5473	protein_coding	RNA binding motif, single stranded interacting protein 1 [Source:MGI Symbol;Acc:MGI:1861774]	-	-
ENSMUSG00000013662	1529	2367	2193	2026	1797	1224	2308	2616	2439	2646	2147	1869	1953	1937	2461	Atad1	19	32672563	32712298	-	2813	protein_coding	ATPase family, AAA domain containing 1 [Source:MGI Symbol;Acc:MGI:1915229]	-	-
ENSMUSG00000043384	2210	1719	1593	1799	2722	1694	1636	1731	1595	1867	2358	2687	2451	2512	2912	Gprasp1	X	135742733	135803474	+	8119	protein_coding	G protein-coupled receptor associated sorting protein 1 [Source:MGI Symbol;Acc:MGI:1917418]	-	-
ENSMUSG00000001687	1439	1824	1733	1735	2227	2047	2603	2980	2676	2945	1641	1754	2178	1626	2010	Ubl3	5	148504635	148552789	-	8098	protein_coding	ubiquitin-like 3 [Source:MGI Symbol;Acc:MGI:1344373]	-	-
ENSMUSG00000021193	2653	2892	1873	2138	1652	1161	2139	2220	2327	2317	1874	2082	1649	2019	2421	Pitrm1	13	6548149	6580515	+	4787	protein_coding	pitrilysin metallepetidase 1 [Source:MGI Symbol;Acc:MGI:1916867]	-	-
ENSMUSG00000005973	1703	1800	1978	1704	2590	1403	1864	2004	1766	1857	3005	2259	2566	1915	3000	Rcn1	2	105386291	105399319	-	3196	protein_coding	reticulocalbin 1 [Source:MGI Symbol;Acc:MGI:104559]	-	-
ENSMUSG00000107176	1470	1877	2021	2007	2631	2378	2255	2060	1798	1810	1724	2459	2114	2242	2564	Gm9794	6	66875321	66875743	-	423	processed_pseudogene	predicted pseudogene 9794 [Source:MGI Symbol;Acc:MGI:3642653]	-	-
ENSMUSG00000052397	1298	1854	2546	2186	1964	1501	2135	1463	1722	1702	4376	1879	2939	1845	1948	Ezr	17	6738041	6782784	-	3290	protein_coding	ezrin [Source:MGI Symbol;Acc:MGI:98931]	-	-
ENSMUSG00000028932	1660	2588	1945	2192	2154	2367	1864	2104	1930	2214	1622	2008	1932	2348	2424	Psmc2	5	21785283	21803787	+	5031	protein_coding	proteasome (prosome, macropain) 26S subunit, ATPase 2 [Source:MGI Symbol;Acc:MGI:109555]	-	-
ENSMUSG00000038406	2102	2006	1883	1628	2670	2526	2161	2473	2214	2245	1835	1746	1702	2190	1966	Scaf1	7	45002948	45016363	-	5930	protein_coding	SR-related CTD-associated factor 1 [Source:MGI Symbol;Acc:MGI:2141980]	-	-
ENSMUSG00000091896	1556	2160	2242	2054	1961	1502	2114	2264	2182	2197	2052	2191	2279	2138	2437	Ube2d2a	18	35771559	35807172	+	2483	protein_coding	ubiquitin-conjugating enzyme E2D 2A [Source:MGI Symbol;Acc:MGI:1930715]	-	-
ENSMUSG00000049553	2492	2066	2231	1840	2041	1504	1842	1881	2013	1877	2669	2439	1693	2346	2379	Polr1a	6	71909053	71984935	+	11871	protein_coding	polymerase (RNA) I polypeptide A [Source:MGI Symbol;Acc:MGI:1096397]	-	-
ENSMUSG00000030751	1327	2532	2255	2633	1867	1619	2032	1917	2096	2022	1401	2098	2226	2429	2819	Psma1	7	114264606	114276118	-	2952	protein_coding	proteasome (prosome, macropain) subunit, alpha type 1 [Source:MGI Symbol;Acc:MGI:1347005]	-	-
ENSMUSG00000079020	1667	2049	1712	1772	1401	2179	3309	3085	3025	2854	1859	1615	1353	1560	1832	Slc45a4	15	73577424	73645762	-	8471	protein_coding	solute carrier family 45, member 4 [Source:MGI Symbol;Acc:MGI:2146236]	-	-
ENSMUSG00000047459	1815	2366	2083	2325	2178	2673	1864	1839	1770	1914	1150	1924	2454	2408	2505	Dynlrb1	2	155236533	155250277	+	1009	protein_coding	dynein light chain roadblock-type 1 [Source:MGI Symbol;Acc:MGI:1914318]	-	-
ENSMUSG00000028367	1038	2485	1610	1939	2522	2244	2375	2166	2453	2273	1061	2072	1946	2398	2685	Txn1	4	57943373	57956411	-	1051	protein_coding	thioredoxin 1 [Source:MGI Symbol;Acc:MGI:98874]	-	-
ENSMUSG00000026918	1506	1986	1881	1976	2199	1838	2322	2563	2071	2434	1986	2292	1838	1986	2386	Brd3	2	27445579	27507662	-	7336	protein_coding	bromodomain containing 3 [Source:MGI Symbol;Acc:MGI:1914632]	-	-
ENSMUSG00000025278	1959	1541	1773	1365	1604	1546	3394	2750	2700	2903	3568	1538	1561	1259	1786	Flnb	14	7817957	7951588	+	9198	protein_coding	filamin, beta [Source:MGI Symbol;Acc:MGI:2446089]	-	-
ENSMUSG00000041308	1886	1871	1915	1874	1887	1366	2599	2787	2792	2560	2044	2182	1667	1609	2200	Sntb2	8	106935750	107019714	+	10350	protein_coding	syntrophin, basic 2 [Source:MGI Symbol;Acc:MGI:101771]	-	-
ENSMUSG00000064354	3701	1635	4602	1853	1520	2205	979	1081	1248	1394	2393	1333	2526	2817	1928	mt-Co2	MT	7013	7696	+	684	protein_coding	mitochondrially encoded cytochrome c oxidase II [Source:MGI Symbol;Acc:MGI:102503]	-	-
ENSMUSG00000047888	2583	1885	2006	1671	1841	1409	2522	2828	2696	2988	2439	1883	1343	1590	1525	Tnrc6b	15	80711313	80941085	+	23677	protein_coding	trinucleotide repeat containing 6b [Source:MGI Symbol;Acc:MGI:2443730]	-	-
ENSMUSG00000028580	1719	2025	2008	1996	2120	1436	2328	2560	2426	2377	2020	1967	1930	1919	2358	Pum1	4	130663321	130781564	+	6008	protein_coding	pumilio RNA-binding family member 1 [Source:MGI Symbol;Acc:MGI:1931749]	-	-
ENSMUSG00000027465	1829	2209	1886	1694	1978	1903	2363	2590	2501	2420	1867	1917	1771	1931	2314	Tbc1d20	2	152293828	152313996	+	4171	protein_coding	TBC1 domain family, member 20 [Source:MGI Symbol;Acc:MGI:1914481]	-	-
ENSMUSG00000101188	1959	2832	2538	2755	1770	1201	1715	1660	1853	1717	2188	2133	1784	2374	2689	Eif4a-ps4	1	60703932	60705149	+	1218	processed_pseudogene	eukaryotic translation initiation factor 4A, pseudogene 4 [Source:MGI Symbol;Acc:MGI:1195958]	-	-
ENSMUSG00000031310	1544	1556	1550	1888	2252	1747	1714	2077	1815	1862	2196	2344	2193	2913	3505	Zmym3	X	101404384	101420849	-	8021	protein_coding	zinc finger, MYM-type 3 [Source:MGI Symbol;Acc:MGI:1927231]	-	-
ENSMUSG00000020790	2889	2287	2087	1933	1537	1286	2446	2296	2337	2405	2924	1737	1499	1451	2041	Ankfy1	11	72690006	72772146	+	11332	protein_coding	ankyrin repeat and FYVE domain containing 1 [Source:MGI Symbol;Acc:MGI:1337008]	TRAF	TRAF
ENSMUSG00000079562	1644	2248	2151	1997	2038	1795	2304	2310	2392	2141	2017	2089	1842	1852	2318	Maea	5	33335509	33373296	+	2629	protein_coding	macrophage erythroblast attacher [Source:MGI Symbol;Acc:MGI:1891748]	-	-
ENSMUSG00000041935	1402	2118	2023	1898	1950	2036	2080	2545	2186	2418	1586	2242	2320	2084	2228	AW549877	15	3982035	3995744	-	5199	protein_coding	expressed sequence AW549877 [Source:MGI Symbol;Acc:MGI:2146232]	-	-
ENSMUSG00000027111	1683	1950	1778	2057	1575	1174	1712	1903	1736	1703	3297	2492	2495	2805	2752	Itga6	2	71745616	71858416	+	9025	protein_coding	integrin alpha 6 [Source:MGI Symbol;Acc:MGI:96605]	-	-
ENSMUSG00000027805	1606	2298	2300	1694	2264	1495	1778	2984	2211	2626	1306	2040	2133	1805	2572	Pfn2	3	57841895	57848079	-	3541	protein_coding	profilin 2 [Source:MGI Symbol;Acc:MGI:97550]	-	-
ENSMUSG00000053580	2325	1340	1975	1628	3115	776	1256	1449	1192	1091	3248	3444	2651	2297	3321	Tanc2	11	105589986	105929304	+	16605	protein_coding	tetratricopeptide repeat, ankyrin repeat and coiled-coil containing 2 [Source:MGI Symbol;Acc:MGI:2444121]	-	-
ENSMUSG00000031024	1856	2438	1766	1899	1763	1869	2481	2210	2770	2333	1696	1897	1712	2195	2184	St5	7	109523911	109703605	-	5738	protein_coding	suppression of tumorigenicity 5 [Source:MGI Symbol;Acc:MGI:108517]	-	-
ENSMUSG00000022246	1804	2179	2196	2190	2169	1568	1928	2012	2155	1984	1760	2223	2168	2488	2221	Rai14	15	10568969	10714624	-	8462	protein_coding	retinoic acid induced 14 [Source:MGI Symbol;Acc:MGI:1922896]	-	-
ENSMUSG00000024892	1164	1187	1533	909	1857	2443	3685	4543	3477	4008	1531	1125	1238	732	1592	Pcx	19	4510472	4621752	+	4637	protein_coding	pyruvate carboxylase [Source:MGI Symbol;Acc:MGI:97520]	-	-
ENSMUSG00000034610	1752	1766	1775	2327	2854	861	1280	1327	1254	1253	2517	3449	2393	2849	3364	Tut4	4	108459426	108559421	+	8684	protein_coding	terminal uridylyl transferase 4 [Source:MGI Symbol;Acc:MGI:2445126]	-	-
ENSMUSG00000058569	1478	2081	1802	1638	2944	2705	2211	2402	2099	2257	1789	1782	1763	1836	2229	Tmed9	13	55573732	55597697	+	3439	protein_coding	transmembrane p24 trafficking protein 9 [Source:MGI Symbol;Acc:MGI:1914761]	-	-
ENSMUSG00000002010	1674	2081	1922	1867	2140	2400	2096	2260	2032	2220	1396	2077	2189	2185	2476	Idh3g	X	73778963	73786897	-	2701	protein_coding	isocitrate dehydrogenase 3 (NAD+), gamma [Source:MGI Symbol;Acc:MGI:1099463]	-	-
ENSMUSG00000037876	1734	1727	1897	1717	2436	1499	2359	2463	2233	2485	2250	2222	2006	1864	2093	Jmjd1c	10	67096125	67256326	+	17822	protein_coding	jumonji domain containing 1C [Source:MGI Symbol;Acc:MGI:1918614]	Jumonji	Jumonji
ENSMUSG00000031592	1741	2323	2193	2083	1732	1088	2111	2239	2064	2027	2680	2116	2261	1997	2318	Pcm1	8	41239752	41332344	+	7458	protein_coding	pericentriolar material 1 [Source:MGI Symbol;Acc:MGI:1277958]	-	-
ENSMUSG00000003435	2089	2244	1800	1955	2051	1774	2336	2487	2504	2251	2277	1817	1390	1863	2117	Supt5	7	28314891	28338746	-	5764	protein_coding	suppressor of Ty 5 [Source:MGI Symbol;Acc:MGI:1202400]	-	-
ENSMUSG00000038762	2277	2316	2081	1980	2112	1639	1911	2101	2130	1995	2437	1908	1915	1999	2146	Abcf1	17	35956819	35969761	-	4410	protein_coding	ATP-binding cassette, sub-family F (GCN20), member 1 [Source:MGI Symbol;Acc:MGI:1351658]	-	-
ENSMUSG00000028514	2043	2024	1939	1722	1806	1641	2588	2569	2431	2565	2459	1755	1606	1716	2012	Usp24	4	106316213	106441322	+	12350	protein_coding	ubiquitin specific peptidase 24 [Source:MGI Symbol;Acc:MGI:1919936]	-	-
ENSMUSG00000024070	1692	2075	1828	1921	1688	1383	2711	2530	2673	2346	2286	2133	1749	1670	2190	Prkd3	17	78949405	79020816	-	11017	protein_coding	protein kinase D3 [Source:MGI Symbol;Acc:MGI:1922542]	-	-
ENSMUSG00000026374	2009	2112	2114	1910	2091	1807	2003	2396	2153	2130	1930	1996	1936	1879	2388	Tsn	1	118294778	118311739	-	9046	protein_coding	translin [Source:MGI Symbol;Acc:MGI:109263]	-	-
ENSMUSG00000035150	2293	2067	2157	2126	1476	911	2455	2357	2330	2383	3140	1943	1436	1420	2346	Eif2s3x	X	94188707	94212862	-	3812	protein_coding	eukaryotic translation initiation factor 2, subunit 3, structural gene X-linked [Source:MGI Symbol;Acc:MGI:1349431]	-	-
ENSMUSG00000026547	1931	2907	2204	2176	1879	2003	2049	1552	2287	1602	2044	1906	1947	2496	1855	Tagln2	1	172500047	172507380	+	2082	protein_coding	transgelin 2 [Source:MGI Symbol;Acc:MGI:1312985]	-	-
ENSMUSG00000023025	1806	2413	2200	2110	1769	1105	2341	2591	2177	2593	2331	1886	1629	1857	2026	Larp4	15	99970065	100016358	+	10843	protein_coding	La ribonucleoprotein domain family, member 4 [Source:MGI Symbol;Acc:MGI:2443114]	-	-
ENSMUSG00000066037	1862	2093	1930	2015	2311	1533	1969	2277	1911	2076	2168	2286	1962	2099	2332	Hnrnpr	4	136310942	136359447	+	22199	protein_coding	heterogeneous nuclear ribonucleoprotein R [Source:MGI Symbol;Acc:MGI:1891692]	-	-
ENSMUSG00000054408	1681	2491	2072	2024	1811	1394	2203	2420	2126	2193	1832	1903	1925	2027	2708	Spcs3	8	54520433	54529998	-	3466	protein_coding	signal peptidase complex subunit 3 homolog (S. cerevisiae) [Source:MGI Symbol;Acc:MGI:1923937]	-	-
ENSMUSG00000061410	2276	1827	2027	1611	1977	1734	2712	2563	2583	2324	2374	1732	1747	1535	1776	Zcchc14	8	121598703	121652901	-	7780	protein_coding	zinc finger, CCHC domain containing 14 [Source:MGI Symbol;Acc:MGI:2159407]	-	-
ENSMUSG00000019301	1328	1353	2039	2474	6744	636	531	1414	550	479	877	2672	1370	3012	5290	Hsd17b1	11	101078411	101080527	+	1339	protein_coding	hydroxysteroid (17-beta) dehydrogenase 1 [Source:MGI Symbol;Acc:MGI:105077]	-	-
ENSMUSG00000034462	1775	2028	1639	1708	1878	1835	2820	2406	2601	2478	1760	1819	2043	2027	1943	Pkd2	5	104459450	104505819	+	10169	protein_coding	polycystic kidney disease 2 [Source:MGI Symbol;Acc:MGI:1099818]	-	-
ENSMUSG00000003731	1881	2243	2010	1839	1734	1598	2347	2667	2468	2710	2289	1815	1430	1642	2085	Kpna6	4	129643980	129672767	-	6729	protein_coding	karyopherin (importin) alpha 6 [Source:MGI Symbol;Acc:MGI:1100836]	-	-
ENSMUSG00000024713	5685	3852	1271	1161	1234	1209	1936	1699	1913	1657	1318	1152	1469	2564	2631	Pcsk5	19	17432832	17837632	-	9346	protein_coding	proprotein convertase subtilisin/kexin type 5 [Source:MGI Symbol;Acc:MGI:97515]	-	-
ENSMUSG00000074794	2456	1945	2182	2074	2853	715	1160	1643	1513	1574	1811	2756	2351	2406	3311	Arrdc3	13	80883384	80896042	+	6266	protein_coding	arrestin domain containing 3 [Source:MGI Symbol;Acc:MGI:2145242]	-	-
ENSMUSG00000044477	1864	2099	1966	1994	2017	2075	2384	2412	2383	2385	1912	1860	1556	1804	2039	Zfand3	17	30005051	30210828	+	3527	protein_coding	zinc finger, AN1-type domain 3 [Source:MGI Symbol;Acc:MGI:1096572]	-	-
ENSMUSG00000034850	1948	1921	1946	1606	1830	1662	2608	2720	2724	2642	2422	1781	1505	1514	1917	Tmem127	2	127247908	127261107	+	4811	protein_coding	transmembrane protein 127 [Source:MGI Symbol;Acc:MGI:1916720]	-	-
ENSMUSG00000020267	1364	2314	1789	1982	2130	2627	2044	2186	2016	2115	1456	2104	2070	2261	2234	Hint1	11	54866383	54870501	+	872	protein_coding	histidine triad nucleotide binding protein 1 [Source:MGI Symbol;Acc:MGI:1321133]	-	-
ENSMUSG00000030826	1036	1661	1966	1734	2538	3011	2156	3189	2507	2853	1130	1748	1682	1541	1937	Bcat2	7	45570153	45589711	+	3900	protein_coding	branched chain aminotransferase 2, mitochondrial [Source:MGI Symbol;Acc:MGI:1276534]	-	-
ENSMUSG00000031176	1634	2136	2063	1947	1712	1696	2441	2673	2530	2570	1964	1695	2004	1677	1934	Dynlt3	X	9654267	9663003	-	2576	protein_coding	dynein light chain Tctex-type 3 [Source:MGI Symbol;Acc:MGI:1914367]	-	-
ENSMUSG00000021027	2034	1800	1877	1780	1814	1487	2678	2501	2410	2611	2056	1994	1738	1867	2021	Ralgapa1	12	55602896	55821167	-	12315	protein_coding	Ral GTPase activating protein, alpha subunit 1 [Source:MGI Symbol;Acc:MGI:1931050]	-	-
ENSMUSG00000026356	1586	2350	2033	2244	1906	1411	2067	2066	2089	2174	1814	2067	2207	2170	2481	Dars	1	128363707	128417368	-	4358	protein_coding	aspartyl-tRNA synthetase [Source:MGI Symbol;Acc:MGI:2442544]	-	-
ENSMUSG00000014959	1760	2174	1848	1830	2216	2086	2289	2456	2118	2193	1847	1772	2149	1779	2112	Gorasp2	2	70661576	70712636	+	4145	protein_coding	golgi reassembly stacking protein 2 [Source:MGI Symbol;Acc:MGI:2135962]	-	-
ENSMUSG00000045294	1195	2132	1573	2403	1201	1885	2790	3457	2456	3462	2029	1692	1064	1935	1333	Insig1	5	28071363	28078662	+	3093	protein_coding	insulin induced gene 1 [Source:MGI Symbol;Acc:MGI:1916289]	-	-
ENSMUSG00000034602	2047	2113	1908	1870	1728	1632	2332	2415	2285	2258	2101	1827	1886	1978	2217	Mon2	10	122992060	123076505	-	14041	protein_coding	MON2 homolog, regulator of endosome to Golgi trafficking [Source:MGI Symbol;Acc:MGI:1914324]	-	-
ENSMUSG00000026623	1636	2389	1611	1820	1597	1368	2943	2696	2831	2816	1853	1758	1488	1845	1935	Lpgat1	1	191717834	191784255	+	7610	protein_coding	lysophosphatidylglycerol acyltransferase 1 [Source:MGI Symbol;Acc:MGI:2446186]	-	-
ENSMUSG00000026277	1765	2162	1907	1833	2306	2172	1902	1923	2100	2081	1637	2041	1856	2345	2540	Stk25	1	93619751	93658659	-	5812	protein_coding	serine/threonine kinase 25 (yeast) [Source:MGI Symbol;Acc:MGI:1891699]	-	-
ENSMUSG00000031540	2386	2134	1781	1789	1728	1354	2798	2786	2559	2428	2542	1717	1443	1458	1663	Kat6a	8	22859535	22943259	+	9180	protein_coding	K(lysine) acetyltransferase 6A [Source:MGI Symbol;Acc:MGI:2442415]	PHD	PHD
ENSMUSG00000020810	1156	1699	1685	1345	1919	2877	3050	2840	2893	2800	1396	1820	1683	1658	1723	Cygb	11	116645595	116654313	-	2331	protein_coding	cytoglobin [Source:MGI Symbol;Acc:MGI:2149481]	-	-
ENSMUSG00000095041	1205	1516	1023	1474	2293	4233	2231	1976	2180	2094	580	2273	1951	3827	1651	AC149090.1	JH584304.1	52190	59690	-	4238	protein_coding		-	-
ENSMUSG00000019820	2020	1954	1753	1397	1778	1341	3170	2757	2831	2674	2477	1636	1603	1359	1751	Utrn	10	12382188	12869365	-	17108	protein_coding	utrophin [Source:MGI Symbol;Acc:MGI:104631]	-	-
ENSMUSG00000005698	1646	2103	2025	2134	2009	1553	2008	2036	2031	1883	2092	2073	2206	2111	2586	Ctcf	8	105636568	105682922	+	4860	protein_coding	CCCTC-binding factor [Source:MGI Symbol;Acc:MGI:109447]	C2H2	C2H2
ENSMUSG00000099764	1587	2005	2009	1732	2300	2254	2117	1994	2093	2088	1955	2029	2192	1720	2421	Rps10-ps2	16	20822145	20822640	-	496	processed_pseudogene	ribosomal protein S10, pseudogene 2 [Source:MGI Symbol;Acc:MGI:3645627]	-	-
ENSMUSG00000026466	1639	2119	1839	1916	1757	1615	2591	2887	2405	2768	1736	1756	1548	1695	2223	Tor1aip1	1	156004599	156036480	-	5406	protein_coding	torsin A interacting protein 1 [Source:MGI Symbol;Acc:MGI:3582693]	-	-
ENSMUSG00000028960	2289	2381	2137	2199	1842	1453	1753	2012	2038	1848	2395	1989	1703	2086	2363	Ube4b	4	149328416	149426749	-	7078	protein_coding	ubiquitination factor E4B [Source:MGI Symbol;Acc:MGI:1927086]	-	-
ENSMUSG00000021024	1637	2365	2244	2137	2036	1746	1908	2050	1804	2012	1794	2142	2063	2122	2417	Psma6	12	55384222	55418454	+	1234	protein_coding	proteasome (prosome, macropain) subunit, alpha type 6 [Source:MGI Symbol;Acc:MGI:1347006]	-	-
ENSMUSG00000037149	2053	2399	2070	1887	1885	1524	1975	2144	1832	2118	2220	1963	1871	1900	2635	Ddx1	12	13216973	13249213	-	5080	protein_coding	DEAD (Asp-Glu-Ala-Asp) box polypeptide 1 [Source:MGI Symbol;Acc:MGI:2144727]	-	-
ENSMUSG00000003420	2370	1945	1830	1336	1878	2248	2540	2462	2647	2347	1632	1514	1410	2058	2252	Fcgrt	7	45092990	45103851	-	2102	protein_coding	Fc receptor, IgG, alpha chain transporter [Source:MGI Symbol;Acc:MGI:103017]	-	-
ENSMUSG00000028228	1758	2402	1845	1973	1530	1322	2643	2572	2437	2491	1968	1804	1888	1607	2221	Cpne3	4	19519254	19570108	-	7131	protein_coding	copine III [Source:MGI Symbol;Acc:MGI:1917818]	-	-
ENSMUSG00000029238	2212	2514	1901	1847	1303	1393	2700	2502	2774	2633	2233	1669	1557	1631	1584	Clock	5	76209868	76304792	-	13727	protein_coding	circadian locomotor output cycles kaput [Source:MGI Symbol;Acc:MGI:99698]	bHLH	bHLH
ENSMUSG00000025451	1966	1792	2164	1978	1992	1553	1972	2397	2129	2390	2210	1882	1897	1879	2242	Paip1	13	119428601	119458218	+	3456	protein_coding	polyadenylate binding protein-interacting protein 1 [Source:MGI Symbol;Acc:MGI:2384993]	-	-
ENSMUSG00000022351	1074	2274	1685	2870	1178	1764	2600	3307	2299	3304	1960	1741	1183	2025	1177	Sqle	15	59315077	59331192	+	5546	protein_coding	squalene epoxidase [Source:MGI Symbol;Acc:MGI:109296]	-	-
ENSMUSG00000055932	1971	2079	1946	1840	2176	1398	2106	2283	2278	2300	2036	1982	1911	2009	2120	Fto	8	91313525	91668439	+	13031	protein_coding	fat mass and obesity associated [Source:MGI Symbol;Acc:MGI:1347093]	-	-
ENSMUSG00000027435	1971	2623	2075	1948	1350	1408	2666	2471	2572	2800	1873	1929	1407	1596	1744	Cd93	2	148436640	148443563	-	6677	protein_coding	CD93 antigen [Source:MGI Symbol;Acc:MGI:106664]	-	-
ENSMUSG00000056501	1168	2433	1690	1761	2839	3148	2352	2868	2107	2670	878	1414	1878	1567	1636	Cebpb	2	167688915	167690418	+	1504	protein_coding	CCAAT/enhancer binding protein (C/EBP), beta [Source:MGI Symbol;Acc:MGI:88373]	bZIP	bZIP
ENSMUSG00000001891	1783	2210	1779	1849	1651	1746	2522	2693	2226	2858	1667	1792	1812	1691	2128	Ugp2	11	21321138	21371201	-	3069	protein_coding	UDP-glucose pyrophosphorylase 2 [Source:MGI Symbol;Acc:MGI:2183447]	-	-
ENSMUSG00000039844	2557	2052	2075	1644	1846	1303	2452	2291	2223	2379	2752	1737	1467	1631	1992	Rapgef1	2	29619720	29740978	+	7385	protein_coding	Rap guanine nucleotide exchange factor (GEF) 1 [Source:MGI Symbol;Acc:MGI:104580]	-	-
ENSMUSG00000030748	1838	2139	2335	1451	1846	2053	2939	2709	3458	2744	1868	975	1649	1132	1261	Il4ra	7	125552120	125579474	+	6002	protein_coding	interleukin 4 receptor, alpha [Source:MGI Symbol;Acc:MGI:105367]	-	-
ENSMUSG00000036138	1508	1885	1816	1444	2368	2617	2206	2461	2448	2427	1743	1814	1722	1922	2010	Acaa1a	9	119339676	119350299	+	4414	protein_coding	acetyl-Coenzyme A acyltransferase 1A [Source:MGI Symbol;Acc:MGI:2148491]	-	-
ENSMUSG00000011831	1755	1913	2155	1922	1898	1262	2301	2412	2271	2547	2042	1967	2023	1704	2217	Evi5	5	107744795	107875107	-	8060	protein_coding	ecotropic viral integration site 5 [Source:MGI Symbol;Acc:MGI:104736]	-	-
ENSMUSG00000020432	1459	1926	1837	1250	2220	2564	2457	2630	2869	2673	1297	1678	1637	1816	2073	Tcn2	11	3917192	3932159	-	2178	protein_coding	transcobalamin 2 [Source:MGI Symbol;Acc:MGI:98534]	-	-
ENSMUSG00000042364	1808	1887	2164	2132	2189	953	1622	1592	1647	1464	2853	2579	2396	2082	2987	Snx18	13	113592179	113618564	-	5220	protein_coding	sorting nexin 18 [Source:MGI Symbol;Acc:MGI:2137642]	-	-
ENSMUSG00000022800	1570	1936	2026	2094	1730	1487	2186	2252	2150	2182	1853	2081	2115	2269	2420	Fyttd1	16	32877500	32908875	+	6633	protein_coding	forty-two-three domain containing 1 [Source:MGI Symbol;Acc:MGI:1917955]	-	-
ENSMUSG00000033557	1869	1795	1920	1780	1841	970	2472	2886	2525	2581	2423	1811	1604	1484	2355	Fam20b	1	156678532	156719086	-	8770	protein_coding	family with sequence similarity 20, member B [Source:MGI Symbol;Acc:MGI:2443990]	-	-
ENSMUSG00000021819	1819	1691	1737	1690	2526	2306	2177	2392	2407	2173	1810	1924	1824	1887	1953	Zswim8	14	20707552	20723619	+	8590	protein_coding	zinc finger SWIM-type containing 8 [Source:MGI Symbol;Acc:MGI:1919156]	-	-
ENSMUSG00000027303	1943	1852	2077	1690	2064	1655	2472	2455	2491	2348	2157	1690	1608	1668	2141	Ptpra	2	130450278	130556124	+	10848	protein_coding	protein tyrosine phosphatase, receptor type, A [Source:MGI Symbol;Acc:MGI:97808]	-	-
ENSMUSG00000055531	1155	2079	1857	2093	2122	1438	2010	2094	2122	2122	1800	2850	2089	2395	2078	Cpsf6	10	117344673	117380015	-	10510	protein_coding	cleavage and polyadenylation specific factor 6 [Source:MGI Symbol;Acc:MGI:1913948]	-	-
ENSMUSG00000033953	1355	2128	1946	2012	1819	1157	2402	2597	2328	2442	2188	2072	1655	1552	2606	Ppp3r1	11	17159263	17200375	+	3228	protein_coding	protein phosphatase 3, regulatory subunit B, alpha isoform (calcineurin B, type I) [Source:MGI Symbol;Acc:MGI:107172]	-	-
ENSMUSG00000025228	1997	2121	2074	1925	1876	1491	2230	2130	2248	2109	2545	1919	1480	1885	2227	Actr1a	19	46376814	46395735	-	2742	protein_coding	ARP1 actin-related protein 1A, centractin alpha [Source:MGI Symbol;Acc:MGI:1858964]	-	-
ENSMUSG00000001419	1963	2185	1770	1482	1809	1566	2896	2729	2744	2365	1727	1717	1527	1801	1965	Mef2d	3	88142372	88172086	+	5985	protein_coding	myocyte enhancer factor 2D [Source:MGI Symbol;Acc:MGI:99533]	MADS-M-type	MADS->MADS-M-type
ENSMUSG00000034724	2481	1948	2082	1655	1591	1092	2206	2247	2204	2197	2531	2155	2186	1572	2084	Cnot6l	5	96070333	96164171	-	10313	protein_coding	CCR4-NOT transcription complex, subunit 6-like [Source:MGI Symbol;Acc:MGI:2443154]	-	-
ENSMUSG00000029860	1848	2383	1786	1605	2144	1645	2561	2219	1961	2057	1831	1765	2317	1824	2274	Zyx	6	42349630	42360213	+	5390	protein_coding	zyxin [Source:MGI Symbol;Acc:MGI:103072]	LIM	LIM
ENSMUSG00000015749	1480	2265	2279	2772	2074	1166	1802	1911	1742	1793	2324	2327	1727	2219	2325	Anp32e	3	95929246	95947390	+	3566	protein_coding	acidic (leucine-rich) nuclear phosphoprotein 32 family, member E [Source:MGI Symbol;Acc:MGI:1913721]	-	-
ENSMUSG00000028464	2283	3255	2679	1345	2056	1508	2229	1083	1040	1217	4009	1258	2340	1726	2177	Tpm2	4	43514711	43523765	-	2909	protein_coding	tropomyosin 2, beta [Source:MGI Symbol;Acc:MGI:98810]	-	-
ENSMUSG00000034354	1562	1710	1761	1611	2191	1721	2648	2775	2418	2630	2027	1791	1350	1809	2194	Mtmr3	11	4480868	4594863	-	7588	protein_coding	myotubularin related protein 3 [Source:MGI Symbol;Acc:MGI:1921552]	-	-
ENSMUSG00000003068	2279	1885	2027	1561	2388	2325	1973	2108	1919	2000	2228	1853	1495	2060	2094	Stk11	10	80115803	80130682	+	4580	protein_coding	serine/threonine kinase 11 [Source:MGI Symbol;Acc:MGI:1341870]	-	-
ENSMUSG00000027367	1668	2168	1802	1821	1834	1427	2276	2536	2139	2202	2066	2261	1815	1892	2271	Stard7	2	127270218	127298932	+	5567	protein_coding	START domain containing 7 [Source:MGI Symbol;Acc:MGI:2139090]	-	-
ENSMUSG00000022967	1983	2243	1958	1910	2109	1640	2308	2063	2245	2106	1840	1882	1668	2016	2205	Ifnar1	16	91485238	91507441	+	5940	protein_coding	interferon (alpha and beta) receptor 1 [Source:MGI Symbol;Acc:MGI:107658]	-	-
ENSMUSG00000039536	1588	1937	2019	1750	1961	1973	2232	2041	2134	2074	1961	1918	2159	2166	2262	Stau1	2	166947549	166996299	-	6065	protein_coding	staufen double-stranded RNA binding protein 1 [Source:MGI Symbol;Acc:MGI:1338864]	-	-
ENSMUSG00000024507	1982	2143	2017	1796	2054	1473	2082	2224	2127	2072	2260	2014	1807	1769	2349	Hsd17b4	18	50128201	50196269	+	3404	protein_coding	hydroxysteroid (17-beta) dehydrogenase 4 [Source:MGI Symbol;Acc:MGI:105089]	-	-
ENSMUSG00000028207	2622	2155	1759	1625	1856	1087	2413	2270	2237	2295	2195	1934	1724	1710	2276	Asph	4	9448069	9669344	-	16102	protein_coding	aspartate-beta-hydroxylase [Source:MGI Symbol;Acc:MGI:1914186]	-	-
ENSMUSG00000041815	1603	2099	1731	1879	2178	1666	2028	2142	2111	2040	2007	1940	1880	2043	2792	Poldip3	15	83125976	83149384	-	5681	protein_coding	polymerase (DNA-directed), delta interacting protein 3 [Source:MGI Symbol;Acc:MGI:1921076]	-	-
ENSMUSG00000035941	2312	1979	1801	1859	1839	1178	2098	2555	2071	2218	2411	2036	1774	1810	2184	Ibtk	9	85687360	85749334	-	8628	protein_coding	inhibitor of Bruton agammaglobulinemia tyrosine kinase [Source:MGI Symbol;Acc:MGI:1918677]	TRAF	TRAF
ENSMUSG00000059430	1848	5647	2232	1468	1652	1017	2847	988	696	1057	3531	1163	2515	1388	2074	Actg2	6	83512905	83536265	-	1557	protein_coding	actin, gamma 2, smooth muscle, enteric [Source:MGI Symbol;Acc:MGI:104589]	-	-
ENSMUSG00000025066	1517	2017	2028	1782	1943	2298	1744	2203	2123	2226	1416	2011	1868	2170	2774	Sfr1	19	47731756	47735588	+	1583	protein_coding	SWI5 dependent recombination repair 1 [Source:MGI Symbol;Acc:MGI:1915038]	-	-
ENSMUSG00000027829	1134	2140	1756	2249	2377	2380	1533	1653	1651	2046	886	2486	2761	2959	2055	Ccnl1	3	65946151	65958249	-	5997	protein_coding	cyclin L1 [Source:MGI Symbol;Acc:MGI:1922664]	-	-
ENSMUSG00000052296	2039	2184	2148	1805	1971	1617	2212	2115	2070	2052	2414	1842	1654	1734	2206	Ppp6r1	7	4631495	4659019	-	4887	protein_coding	protein phosphatase 6, regulatory subunit 1 [Source:MGI Symbol;Acc:MGI:2442163]	-	-
ENSMUSG00000040212	1466	2371	1659	1553	1543	3370	2464	2016	2639	2553	908	1348	1749	2151	2254	Emp3	7	45918023	45921404	-	1071	protein_coding	epithelial membrane protein 3 [Source:MGI Symbol;Acc:MGI:1098729]	-	-
ENSMUSG00000024286	1807	2089	2150	1937	1685	1255	2438	2478	2277	2268	2546	1778	1786	1596	1953	Ccny	18	9314044	9450150	-	4017	protein_coding	cyclin Y [Source:MGI Symbol;Acc:MGI:1915224]	-	-
ENSMUSG00000058756	1974	1613	1730	1352	2311	2419	2242	2567	2355	2360	1877	1756	1771	1432	2280	Thra	11	98740638	98769006	+	4614	protein_coding	thyroid hormone receptor alpha [Source:MGI Symbol;Acc:MGI:98742]	-	-
ENSMUSG00000026021	1394	2030	2172	2113	2206	2117	1797	2289	1945	2360	1303	1858	2207	2057	2177	Sumo1	1	59586558	59670834	-	2076	protein_coding	small ubiquitin-like modifier 1 [Source:MGI Symbol;Acc:MGI:1197010]	-	-
ENSMUSG00000038371	1946	2013	1801	1824	1993	1564	2506	2449	2553	2223	2253	1972	1562	1444	1918	Sbf2	7	110308013	110614922	-	14783	protein_coding	SET binding factor 2 [Source:MGI Symbol;Acc:MGI:1921831]	-	-
ENSMUSG00000040118	3307	2669	1520	1660	1517	1620	2194	2115	1917	1977	1674	1578	1933	2261	2069	Cacna2d1	5	15934691	16374511	+	12416	protein_coding	calcium channel, voltage-dependent, alpha2/delta subunit 1 [Source:MGI Symbol;Acc:MGI:88295]	-	-
ENSMUSG00000006673	1526	1976	2134	1835	1981	1687	2082	2323	2270	2036	1737	1948	2017	2153	2288	Qrich1	9	108516806	108560163	+	7918	protein_coding	glutamine-rich 1 [Source:MGI Symbol;Acc:MGI:1916482]	-	-
ENSMUSG00000038773	1890	1740	1908	1722	2033	1598	2190	2276	2224	2266	2201	2076	1835	1869	2156	Kdm3b	18	34777047	34838660	+	14095	protein_coding	KDM3B lysine (K)-specific demethylase 3B [Source:MGI Symbol;Acc:MGI:1923356]	Jumonji	Jumonji
ENSMUSG00000030286	1862	2259	2145	1918	1887	1741	2099	2023	2065	2279	1962	1661	2034	1843	2201	Emc3	6	113514874	113531652	-	3361	protein_coding	ER membrane protein complex subunit 3 [Source:MGI Symbol;Acc:MGI:1913337]	-	-
ENSMUSG00000031839	1371	2299	1943	1889	2127	2357	2156	2078	1988	2220	1360	1869	2090	1939	2236	Hsbp1	8	119344488	119348922	+	1861	protein_coding	heat shock factor binding protein 1 [Source:MGI Symbol;Acc:MGI:1915446]	-	-
ENSMUSG00000032434	1514	2005	1659	1702	1778	1430	2769	2871	2790	3021	1650	1853	1479	1505	1892	Cmtm6	9	114731116	114749344	+	3440	protein_coding	CKLF-like MARVEL transmembrane domain containing 6 [Source:MGI Symbol;Acc:MGI:2447165]	-	-
ENSMUSG00000024045	1248	1976	1637	1917	2189	2483	1986	2163	1886	1998	1457	1927	2354	2518	2159	Akap8	17	32303676	32321153	-	3695	protein_coding	A kinase (PRKA) anchor protein 8 [Source:MGI Symbol;Acc:MGI:1928488]	-	-
ENSMUSG00000029550	1180	2093	1984	1830	3184	1557	1820	2188	1959	2017	1457	2145	2219	1820	2441	Sppl3	5	115011137	115098790	+	6648	protein_coding	signal peptide peptidase 3 [Source:MGI Symbol;Acc:MGI:1891433]	-	-
ENSMUSG00000075470	1814	2226	1878	2016	1579	1045	2366	2620	2590	2397	2210	1952	1609	1487	2102	Alg10b	15	90224311	90233471	+	6644	protein_coding	asparagine-linked glycosylation 10B (alpha-1,2-glucosyltransferase) [Source:MGI Symbol;Acc:MGI:2146159]	-	-
ENSMUSG00000041879	1977	2083	1935	2012	1905	1447	1968	2392	2198	2492	1965	1839	1620	1707	2350	Ipo9	1	135382312	135430499	-	8233	protein_coding	importin 9 [Source:MGI Symbol;Acc:MGI:1918944]	-	-
ENSMUSG00000058835	1589	2009	1993	1952	1801	1473	2227	2433	2406	2567	1612	1890	2022	1790	2110	Abi1	2	22940073	23040241	-	4032	protein_coding	abl-interactor 1 [Source:MGI Symbol;Acc:MGI:104913]	-	-
ENSMUSG00000019843	1251	1581	1815	1500	2403	1980	2149	2831	2315	2474	1638	1881	2043	1758	2238	Fyn	10	39368855	39565381	+	4363	protein_coding	Fyn proto-oncogene [Source:MGI Symbol;Acc:MGI:95602]	-	-
ENSMUSG00000031703	1550	2006	2070	2009	1775	1240	2253	2159	2388	2282	2158	2042	1899	1743	2269	Itfg1	8	85717578	85840921	-	11045	protein_coding	integrin alpha FG-GAP repeat containing 1 [Source:MGI Symbol;Acc:MGI:106419]	-	-
ENSMUSG00000019846	3217	2212	2215	1569	2184	1209	1886	2376	1809	2163	1805	1951	1435	1670	2125	Lama4	10	38965515	39110188	+	12068	protein_coding	laminin, alpha 4 [Source:MGI Symbol;Acc:MGI:109321]	-	-
ENSMUSG00000031511	2013	1825	1966	1845	1965	1586	1825	1896	1915	1930	2024	2306	2277	1835	2596	Arhgef7	8	11727721	11835219	+	15751	protein_coding	Rho guanine nucleotide exchange factor (GEF7) [Source:MGI Symbol;Acc:MGI:1860493]	-	-
ENSMUSG00000020463	1447	2001	1966	2138	1715	1236	2362	2319	2343	2334	2027	1870	2073	1900	2072	Ppp4r3b	11	29172890	29220797	+	5694	protein_coding	protein phosphatase 4 regulatory subunit 3B [Source:MGI Symbol;Acc:MGI:2144474]	-	-
ENSMUSG00000029311	2252	1703	1780	1413	1836	2017	2728	2591	2252	2809	1511	1369	1938	1471	2122	Hsd17b11	5	103989762	104021919	-	3265	protein_coding	hydroxysteroid (17-beta) dehydrogenase 11 [Source:MGI Symbol;Acc:MGI:2149821]	-	-
ENSMUSG00000006024	1413	2050	2124	1907	2231	2319	1869	2100	2038	2026	1397	1813	1954	2098	2451	Napa	7	16098458	16117975	+	3786	protein_coding	N-ethylmaleimide sensitive fusion protein attachment protein alpha [Source:MGI Symbol;Acc:MGI:104563]	-	-
ENSMUSG00000024099	1733	2375	2170	2028	1909	2111	1629	1776	1779	1887	1510	1799	1957	2545	2582	Ndufv2	17	66078638	66101559	-	2147	protein_coding	NADH:ubiquinone oxidoreductase core subunit V2 [Source:MGI Symbol;Acc:MGI:1920150]	-	-
ENSMUSG00000048756	2830	1670	2022	1570	1707	1390	2198	2127	2229	2350	2657	1760	1758	1561	1951	Foxo3	10	42181841	42276755	-	7571	protein_coding	forkhead box O3 [Source:MGI Symbol;Acc:MGI:1890081]	-	-
ENSMUSG00000066406	1831	2016	1763	1740	1727	1520	2989	2560	2615	2381	2223	1939	1467	1465	1535	Akap13	7	75455534	75754609	+	20914	protein_coding	A kinase (PRKA) anchor protein 13 [Source:MGI Symbol;Acc:MGI:2676556]	-	-
ENSMUSG00000018446	1211	2367	1787	2141	2073	2121	1787	2089	1986	2052	1258	2275	1756	2304	2564	C1qbp	11	70977836	70983026	-	2826	protein_coding	complement component 1, q subcomponent binding protein [Source:MGI Symbol;Acc:MGI:1194505]	-	-
ENSMUSG00000025060	1807	2055	1822	1956	1598	1545	2510	2408	2256	2379	2091	1961	1689	1707	1986	Slk	19	47579678	47645246	+	8284	protein_coding	STE20-like kinase [Source:MGI Symbol;Acc:MGI:103241]	-	-
ENSMUSG00000043207	1943	2419	2343	2093	1504	1231	2318	2243	2388	2403	2303	1558	1712	1432	1878	Zmpste24	4	121059237	121098241	-	7145	protein_coding	zinc metallopeptidase, STE24 [Source:MGI Symbol;Acc:MGI:1890508]	-	-
ENSMUSG00000017802	1833	1982	1910	1521	1950	1733	2325	2204	2208	2254	1704	1953	1896	1989	2299	Retreg3	11	101096322	101119893	-	3589	protein_coding	reticulophagy regulator family member 3 [Source:MGI Symbol;Acc:MGI:1915248]	-	-
ENSMUSG00000018412	2012	1834	1883	1781	2108	1536	2054	2247	2165	2123	1764	1962	2140	1834	2314	Kansl1	11	104333229	104468861	-	6874	protein_coding	KAT8 regulatory NSL complex subunit 1 [Source:MGI Symbol;Acc:MGI:1923969]	-	-
ENSMUSG00000026031	2010	1897	1988	1847	1659	1407	2583	2491	2472	2515	2120	1743	1586	1668	1763	Cflar	1	58711508	58758884	+	12669	protein_coding	CASP8 and FADD-like apoptosis regulator [Source:MGI Symbol;Acc:MGI:1336166]	-	-
ENSMUSG00000020074	1523	2241	2234	2004	1889	1567	1737	1693	1827	1909	1806	2233	2230	2582	2270	Ccar1	10	62743928	62792286	-	10562	protein_coding	cell division cycle and apoptosis regulator 1 [Source:MGI Symbol;Acc:MGI:1914750]	-	-
ENSMUSG00000020167	1900	1864	1916	1764	2378	2227	1844	1960	1804	1982	1998	1875	1882	2083	2268	Tcf3	10	80409514	80433647	-	4039	protein_coding	transcription factor 3 [Source:MGI Symbol;Acc:MGI:98510]	bHLH	bHLH
ENSMUSG00000021702	1939	2098	2346	2028	4005	484	546	633	477	301	2347	3086	2822	2786	3837	Thbs4	13	92751590	92794818	-	3289	protein_coding	thrombospondin 4 [Source:MGI Symbol;Acc:MGI:1101779]	-	-
ENSMUSG00000022124	1163	1815	1809	1809	2149	1875	2415	2392	2237	2230	1519	2168	2250	1989	1910	Fbxl3	14	103080239	103099566	-	5103	protein_coding	F-box and leucine-rich repeat protein 3 [Source:MGI Symbol;Acc:MGI:1354702]	-	-
ENSMUSG00000059890	2266	2258	2189	1981	1640	1423	2062	2096	2251	2057	2139	1697	1820	1790	2047	Ube4a	9	44923127	44965600	-	8639	protein_coding	ubiquitination factor E4A [Source:MGI Symbol;Acc:MGI:2154580]	-	-
ENSMUSG00000046897	1510	1732	1710	1989	1728	2089	2329	2055	2250	2158	2061	2377	1377	2196	2143	Zfp740	15	102203249	102215606	+	5091	protein_coding	zinc finger protein 740 [Source:MGI Symbol;Acc:MGI:1915994]	C2H2	C2H2
ENSMUSG00000024899	1622	1345	1552	1630	1696	2280	2658	3263	2560	3297	1287	1486	1394	1474	2154	Papss2	19	32620005	32667187	+	3635	protein_coding	3'-phosphoadenosine 5'-phosphosulfate synthase 2 [Source:MGI Symbol;Acc:MGI:1330223]	-	-
ENSMUSG00000027104	1722	1937	2115	2067	1871	1229	2075	2323	2188	2323	1892	1892	2124	1781	2157	Atf2	2	73816509	73892639	-	8187	protein_coding	activating transcription factor 2 [Source:MGI Symbol;Acc:MGI:109349]	bZIP	bZIP
ENSMUSG00000055435	2471	1558	1934	1114	2562	1607	2389	2181	2998	2037	1579	1761	2823	1063	1619	Maf	8	115682942	115707794	-	8241	protein_coding	avian musculoaponeurotic fibrosarcoma oncogene homolog [Source:MGI Symbol;Acc:MGI:96909]	bZIP	bZIP
[truncated: 53,897 more rows]

## Sheet: gene_fpkm
Gene FPKM expression matrix of the samples
[truncated: 55,665 more rows]
