# Supplementary material for: Transcriptome analysis during 4-vinylcyclohexene diepoxide exposure-induced premature ovarian insufficiency in mice
Source: PeerJ. 2024 Apr 18;12:e17251. doi: 10.7717/peerj.17251 (PMC11032656; doi:10.7717/peerj.17251)
Supplement: Table S3 [file peerj-12-17251-s005.xlsx]

## Sheet: diff-CON VS V15
List of differences analysed between CON and V15
gene_id: Gene number; sample: Readcount values after normalisation for each sample group: Mean value of readcount for each group; log2FoldChange: The ratio of gene expression levels in the treatment group to the control group was then taken as a logarithm with 2 as the base; pvalue: The p-value for the test of significance; padj: Multiple hypothesis testing corrected p-values; gene_name: Gene nam…
gene_id	V15_1	V15_2	V15_3	V15_4	V15_5	CON_1	CON_2	CON_3	CON_4	CON_5	V15	CON	log2FoldChange	pvalue	padj	gene_name	gene_chr	gene_start	gene_end	gene_strand	gene_length	gene_biotype	gene_description	Subfamily	Family
ENSMUSG00000050810	34.4236	39.5022	40.8981	73.2984	42.5057	269.226	300.326	328.547	256.569	227.175	46.1256	276.369	-2.58259	2.72031e-27	6.27956e-23	Oog3	4	144157557	144162663	-	1865	protein_coding	oogenesin 3 [Source:MGI Symbol;Acc:MGI:2684047]	-	-
ENSMUSG00000085079	56.9771	45.283	75.8111	138.099	100.468	393.408	619.903	640.422	649.779	602.887	83.3275	581.28	-2.80216	4.75908e-24	5.49293e-20	Khdc1b	1	21383556	21386373	+	2236	protein_coding	KH domain containing 1B [Source:MGI Symbol;Acc:MGI:2138477]	-	-
ENSMUSG00000032999	91.4007	43.3561	101.746	99.8559	110.128	460.963	376.37	473.697	438.429	447.36	89.2975	439.364	-2.29979	7.63094e-24	5.87175e-20	Nlrp4f	13	65177111	65205977	-	3870	protein_coding	NLR family, pyrin domain containing 4F [Source:MGI Symbol;Acc:MGI:2145528]	-	-
ENSMUSG00000059218	40.3588	39.5022	32.918	94.5444	59.8944	272.206	354.23	476.639	408.938	365.227	53.4435	375.448	-2.81301	4.05901e-23	2.34245e-19	Gm13084	4	143809245	143816093	-	2124	protein_coding	predicted gene 13084 [Source:MGI Symbol;Acc:MGI:3650237]	-	-
ENSMUSG00000040935	74.7824	85.7487	103.741	262.387	272.423	774.894	1595	2265.51	1565.96	1598.09	159.817	1559.89	-3.28623	1.21767e-19	5.62174e-16	Padi6	4	140727355	140742643	-	2532	protein_coding	peptidyl arginine deiminase, type VI [Source:MGI Symbol;Acc:MGI:2655198]	-	-
ENSMUSG00000060508	35.6107	13.4886	37.9055	55.2394	67.6227	251.344	303.213	338.355	287.043	268.241	41.9734	289.639	-2.78646	5.04242e-19	1.93999e-15	Nlrp9b	7	19991465	20073306	+	3724	protein_coding	NLR family, pyrin domain containing 9B [Source:MGI Symbol;Acc:MGI:2675377]	-	-
ENSMUSG00000033847	58.1641	49.1369	61.8459	114.728	118.823	304.99	473.591	633.557	499.376	373.965	80.5395	457.096	-2.50374	4.61474e-18	1.52181e-14	Pla2g4c	7	13324655	13360672	+	3747	protein_coding	phospholipase A2, group IVC (cytosolic, calcium-independent) [Source:MGI Symbol;Acc:MGI:1196403]	-	-
ENSMUSG00000024734	14.2443	21.1963	19.9503	59.4886	65.6906	182.795	404.285	566.867	382.397	406.294	36.114	388.527	-3.4242	9.10467e-18	2.62715e-14	Zp1	19	10914287	10920632	-	1981	protein_coding	zona pellucida glycoprotein 1 [Source:MGI Symbol;Acc:MGI:103073]	-	-
ENSMUSG00000066867	43.9198	29.8675	45.8857	86.046	110.128	320.886	350.38	403.083	390.261	422.021	63.1695	377.326	-2.57709	1.68792e-17	4.13752e-14	Oas1e	5	120786226	120795530	-	1801	protein_coding	2'-5' oligoadenylate synthetase 1E [Source:MGI Symbol;Acc:MGI:2180856]	-	-
ENSMUSG00000029736	15.4313	3.85387	15.9602	29.7443	28.9812	128.156	190.591	157.899	160.233	235.912	18.7942	174.558	-3.21703	1.79238e-17	4.13752e-14	Nobox	6	43303674	43309554	-	2012	protein_coding	NOBOX oogenesis homeobox [Source:MGI Symbol;Acc:MGI:108011]	HB-other	HB->HB-other
ENSMUSG00000057534	49.8549	17.3424	26.9329	60.5509	72.4529	211.606	320.54	373.661	327.347	303.191	45.4268	307.269	-2.75985	2.9293e-17	6.14727e-14	Elobl	11	88964658	88966931	-	833	protein_coding	elongin B-like [Source:MGI Symbol;Acc:MGI:1860403]	-	-
ENSMUSG00000034087	37.9847	16.379	41.8956	56.3017	57.9623	200.678	230.057	222.628	198.571	245.524	42.1047	219.491	-2.38318	3.84408e-17	7.07149e-14	Nlrp4b	7	10687789	10730168	+	4491	protein_coding	NLR family, pyrin domain containing 4B [Source:MGI Symbol;Acc:MGI:3056570]	-	-
ENSMUSG00000016626	81.9045	110.799	120.699	424.919	310.098	1428.59	1728.8	2487.15	1707.51	1619.93	209.684	1794.4	-3.09681	3.98239e-17	7.07149e-14	Nlrp14	7	107166990	107198102	+	3537	protein_coding	NLR family, pyrin domain containing 14 [Source:MGI Symbol;Acc:MGI:1924108]	-	-
ENSMUSG00000086842	10.6832	10.5981	10.9727	19.1213	21.2529	126.169	104.921	127.496	77.6589	75.1425	14.5256	102.277	-2.81117	1.19296e-16	1.96702e-13	Gm15681	8	99145386	99148089	-	2704	processed_pseudogene	predicted gene 15681 [Source:MGI Symbol;Acc:MGI:3783123]	-	-
ENSMUSG00000042417	24.9275	25.0502	54.8633	57.364	71.4869	250.35	257.009	384.449	216.265	244.65	46.7384	270.545	-2.52941	1.43148e-16	2.20296e-13	Ccno	13	112987802	112990777	+	2555	protein_coding	cyclin O [Source:MGI Symbol;Acc:MGI:2145534]	-	-
ENSMUSG00000064293	26.1145	13.4886	25.9354	38.2427	43.4718	216.573	154.976	156.918	192.673	124.072	29.4506	169.042	-2.52059	1.99877e-16	2.88372e-13	Cntn4	6	105677660	106699310	+	8486	protein_coding	contactin 4 [Source:MGI Symbol;Acc:MGI:1095737]	-	-
ENSMUSG00000023279	53.416	73.2236	61.8459	182.715	175.819	531.498	698.835	733.592	713.676	630.847	109.404	661.69	-2.59523	4.93816e-16	6.70544e-13	Bmp15	X	6314107	6320721	-	3060	protein_coding	bone morphogenetic protein 15 [Source:MGI Symbol;Acc:MGI:1316745]	-	-
ENSMUSG00000001166	41.5458	42.3926	65.8359	73.2984	66.6567	153.985	253.159	286.376	282.128	228.922	57.9459	240.914	-2.05392	5.36508e-16	6.88042e-13	Oas1c	5	120800194	120812514	-	2405	protein_coding	2'-5' oligoadenylate synthetase 1C [Source:MGI Symbol;Acc:MGI:2149633]	-	-
ENSMUSG00000001168	17.8053	6.74428	11.9702	30.8066	23.1849	104.313	117.435	108.862	120.912	152.032	18.1023	120.711	-2.74317	2.3217e-15	2.82074e-12	Oas1h	5	120861421	120873506	+	1703	protein_coding	2'-5' oligoadenylate synthetase 1H [Source:MGI Symbol;Acc:MGI:2180853]	-	-
ENSMUSG00000018727	46.2939	31.7944	67.831	54.1771	72.4529	259.291	179.04	300.106	218.231	191.351	54.5099	229.604	-2.07273	2.48141e-15	2.86404e-12	Cpsf4l	11	113698172	113710017	-	2246	protein_coding	cleavage and polyadenylation specific factor 4-like [Source:MGI Symbol;Acc:MGI:1277182]	C3H	C3H
ENSMUSG00000040601	34.4236	35.6483	35.9105	88.1706	63.7586	200.678	233.908	324.624	235.926	242.029	51.5823	247.433	-2.26143	5.54199e-15	6.09197e-12	Nlrp4a	7	26435113	26476142	+	4841	protein_coding	NLR family, pyrin domain containing 4A [Source:MGI Symbol;Acc:MGI:2443697]	-	-
ENSMUSG00000018238	73.5954	95.3833	67.831	245.39	314.929	1050.08	1124.3	1279.86	1016.45	1110.54	159.426	1116.24	-2.80674	6.63701e-15	6.96403e-12	Gdf9	11	53431023	53437904	+	2031	protein_coding	growth differentiation factor 9 [Source:MGI Symbol;Acc:MGI:95692]	-	-
ENSMUSG00000025586	74.7824	102.128	100.749	149.784	122.687	371.552	345.567	411.91	366.668	263.872	110.026	351.914	-1.67528	7.01393e-15	7.03954e-12	Cpeb1	7	81347026	81455465	-	4192	protein_coding	cytoplasmic polyadenylation element binding protein 1 [Source:MGI Symbol;Acc:MGI:108442]	-	-
ENSMUSG00000032623	23.7404	21.1963	39.9006	84.9837	59.8944	245.383	229.095	311.875	236.909	299.696	45.9431	264.591	-2.52481	2.48084e-14	2.38615e-11	Oas1d	5	120914536	120921652	+	2021	protein_coding	2'-5' oligoadenylate synthetase 1D [Source:MGI Symbol;Acc:MGI:2140770]	-	-
ENSMUSG00000074060	17.8053	9.63468	43.8906	55.2394	46.3699	150.012	262.785	296.183	265.417	241.155	34.588	243.11	-2.81159	5.86242e-14	5.32523e-11	Fbxw15	9	109552602	109568262	-	1495	protein_coding	F-box and WD-40 domain protein 15 [Source:MGI Symbol;Acc:MGI:3505701]	-	-
ENSMUSG00000040614	8.30916	23.1232	17.9553	37.1804	23.1849	96.365	112.622	138.284	179.893	120.577	21.9506	129.548	-2.55505	5.99792e-14	5.32523e-11	Nlrp9c	7	26322473	26403700	-	5935	protein_coding	NLR family, pyrin domain containing 9C [Source:MGI Symbol;Acc:MGI:3028627]	-	-
ENSMUSG00000109936	85.4656	68.4062	47.8807	92.4198	92.7397	233.462	294.55	232.435	314.568	207.079	77.3824	256.419	-1.72969	8.35136e-14	7.1401e-11	Gm45889	7	142283210	142290418	+	3408	lincRNA	predicted gene 45889 [Source:MGI Symbol;Acc:MGI:5805004]	-	-
ENSMUSG00000029151	46.2939	15.4155	19.9503	21.2459	25.117	109.28	135.724	119.65	113.048	119.704	25.6045	119.481	-2.23623	1.09834e-13	9.05502e-11	Slc30a3	5	31086106	31108237	-	2834	protein_coding	solute carrier family 30 (zinc transporter), member 3 [Source:MGI Symbol;Acc:MGI:1345280]	-	-
ENSMUSG00000071089	40.3588	24.0867	42.8931	46.741	35.7434	126.169	137.649	167.706	133.691	115.335	37.9646	136.11	-1.84528	1.17715e-13	9.37011e-11	Trim75	8	64980884	64987831	-	3486	protein_coding	tripartite motif-containing 75 [Source:MGI Symbol;Acc:MGI:2685640]	Others	Others
ENSMUSG00000051920	14.2443	14.452	7.98011	41.4296	36.7095	132.129	152.088	167.706	149.42	163.391	22.9631	152.947	-2.73411	1.66591e-13	1.28186e-10	Rspo2	15	43020794	43170826	-	5112	protein_coding	R-spondin 2 [Source:MGI Symbol;Acc:MGI:1922667]	-	-
ENSMUSG00000075023	68.8473	45.283	39.9006	70.1116	80.1812	278.167	230.057	250.088	144.505	250.766	60.8647	230.717	-1.92432	2.2383e-13	1.66674e-10	Accsl	2	93855361	93869157	-	2801	protein_coding	1-aminocyclopropane-1-carboxylate synthase (non-functional)-like [Source:MGI Symbol;Acc:MGI:3584519]	-	-
ENSMUSG00000109718	51.042	39.5022	42.8931	89.2329	108.196	251.344	281.074	324.624	319.483	233.291	66.1733	281.963	-2.0899	3.26933e-13	2.35841e-10	Trim61	8	65012987	65018523	-	1980	protein_coding	tripartite motif-containing 61 [Source:MGI Symbol;Acc:MGI:2387432]	-	-
ENSMUSG00000096276	4.74809	2.8904	5.98509	8.49837	6.76227	44.7054	49.0917	45.114	58.9815	42.8137	5.77684	48.1413	-3.06035	8.00512e-13	5.5997e-10	Gm2042	12	87954080	87960683	+	3073	protein_coding	predicted gene 2042 [Source:MGI Symbol;Acc:MGI:3800544]	-	-
ENSMUSG00000054310	52.229	15.4155	38.9031	44.6164	39.6076	155.972	137.649	238.319	131.725	218.437	38.1543	176.421	-2.21526	1.86174e-12	1.26401e-09	Obox1	7	15388948	15556866	+	1900	protein_coding	oocyte specific homeobox 1 [Source:MGI Symbol;Acc:MGI:1918718]	HB-other	HB->HB-other
ENSMUSG00000032346	35.6107	56.8446	43.8906	71.1739	130.415	181.802	305.139	469.774	422.701	460.466	67.587	367.976	-2.44191	2.45062e-12	1.61629e-09	Ooep	9	78376109	78378725	-	2138	protein_coding	oocyte expressed protein [Source:MGI Symbol;Acc:MGI:1915218]	-	-
ENSMUSG00000078365	34.4236	16.379	20.9478	32.9312	41.5397	108.286	93.3705	189.282	137.623	141.547	29.2443	134.022	-2.19945	3.31577e-12	2.12615e-09	Mos	4	3870657	3872105	-	1449	protein_coding	Moloney sarcoma oncogene [Source:MGI Symbol;Acc:MGI:97052]	-	-
ENSMUSG00000033581	172.118	140.666	162.595	147.659	157.464	392.414	330.166	435.448	329.313	290.085	156.101	355.485	-1.1877	4.03896e-12	2.51988e-09	Igf2bp2	16	22059009	22163299	-	7402	protein_coding	insulin-like growth factor 2 mRNA binding protein 2 [Source:MGI Symbol;Acc:MGI:1890358]	-	-
ENSMUSG00000029451	2.37404	12.5251	7.98011	32.9312	25.117	132.129	109.734	168.687	104.201	143.295	16.1855	131.609	-3.01674	6.41386e-12	3.82794e-09	Gm13103	4	143846497	143853637	+	1982	protein_coding	predicted gene 13103 [Source:MGI Symbol;Acc:MGI:3650203]	-	-
ENSMUSG00000074062	11.8702	5.78081	4.98757	24.4328	12.5585	77.4894	94.3331	78.4591	64.8796	80.385	11.926	79.1092	-2.73883	6.46724e-12	3.82794e-09	Fbxw16	9	109432316	109449140	-	1801	protein_coding	F-box and WD-40 domain protein 16 [Source:MGI Symbol;Acc:MGI:2443324]	-	-
ENSMUSG00000074059	15.4313	27.9406	27.9304	48.8656	22.2189	73.5156	159.789	206.936	173.995	138.926	28.4774	150.632	-2.40123	6.96612e-12	4.02015e-09	Fbxw18	9	109676734	109702700	-	1519	protein_coding	F-box and WD-40 domain protein 18 [Source:MGI Symbol;Acc:MGI:3505704]	-	-
ENSMUSG00000062275	33.2366	21.1963	27.9304	113.666	78.2492	184.782	388.883	578.636	389.278	373.091	54.8556	382.934	-2.80348	1.04569e-11	5.74911e-09	Fbxw24	9	109601116	109626057	-	1488	protein_coding	F-box and WD-40 domain protein 24 [Source:MGI Symbol;Acc:MGI:3646659]	-	-
ENSMUSG00000071235	0	13.4886	8.97763	14.8721	17.3887	97.3585	102.996	117.689	114.031	49.8037	10.9454	96.3756	-3.12118	1.04602e-11	5.74911e-09	Vrtn	12	84641019	84651455	+	3608	protein_coding	vertebrae development associated [Source:MGI Symbol;Acc:MGI:3588197]	-	-
ENSMUSG00000054582	23.7404	8.67121	24.9379	25.4951	25.117	100.339	80.8569	82.382	96.3364	101.355	21.5923	92.2538	-2.09991	1.11928e-11	6.00871e-09	Pabpc1l	2	164025450	164050538	+	2724	protein_coding	poly(A) binding protein, cytoplasmic 1-like [Source:MGI Symbol;Acc:MGI:1922908]	-	-
ENSMUSG00000035177	23.7404	12.5251	22.9428	50.9902	48.3019	158.953	123.211	178.494	187.758	142.421	31.7001	158.167	-2.31851	1.15645e-11	6.06716e-09	Nlrp2	7	5298547	5351035	-	3509	protein_coding	NLR family, pyrin domain containing 2 [Source:MGI Symbol;Acc:MGI:3041206]	-	-
ENSMUSG00000115247	1.18702	2.8904	2.99254	1.0623	7.72831	28.8102	34.653	48.0562	67.8287	48.93	3.17212	45.6556	-3.81482	1.85534e-11	9.51747e-09	AC113125.1	14	105199326	105201099	-	1774	processed_pseudogene	lymphocyte cytosolic protein 1 (Lcp1) pseudogene	-	-
ENSMUSG00000046262	16.6183	9.63468	5.98509	37.1804	37.6755	96.365	154.976	169.668	158.267	162.517	21.4188	148.359	-2.79236	2.07244e-11	1.04e-08	C87977	4	144206775	144213318	-	2981	protein_coding	expressed sequence C87977 [Source:MGI Symbol;Acc:MGI:2140708]	-	-
ENSMUSG00000066027	75.9694	18.3059	28.9279	80.7345	52.1661	192.73	247.384	271.664	231.994	265.62	51.2208	241.878	-2.24544	2.82512e-11	1.38756e-08	Gm10436	12	88175589	88182108	-	2975	protein_coding	predicted gene 10436 [Source:MGI Symbol;Acc:MGI:3704393]	-	-
ENSMUSG00000010592	23.7404	31.7944	19.9503	31.8689	44.4378	70.5352	138.612	137.303	128.776	155.527	30.3584	126.151	-2.05174	3.00175e-11	1.44359e-08	Dazl	17	50279395	50293636	-	3820	protein_coding	deleted in azoospermia-like [Source:MGI Symbol;Acc:MGI:1342328]	-	-
ENSMUSG00000035262	491.427	534.725	176.56	782.912	1016.27	2262.09	2362.18	2846.1	2467.39	3659.26	600.379	2719.41	-2.17925	3.11067e-11	1.46544e-08	Amh	10	80805243	80807648	+	1670	protein_coding	anti-Mullerian hormone [Source:MGI Symbol;Acc:MGI:88006]	-	-
ENSMUSG00000028758	51.042	37.5753	51.8707	40.3673	44.4378	134.116	109.734	157.899	132.708	111.84	45.0586	129.26	-1.52183	3.17447e-11	1.46559e-08	Kif17	4	138250435	138301967	+	4582	protein_coding	kinesin family member 17 [Source:MGI Symbol;Acc:MGI:1098229]	-	-
ENSMUSG00000081044	29.6756	30.831	36.908	91.3575	80.1812	264.259	231.02	346.201	209.384	192.225	53.7907	248.618	-2.20678	4.30959e-11	1.95064e-08	AU015836	X	93968659	93975470	+	3335	protein_coding	expressed sequence AU015836 [Source:MGI Symbol;Acc:MGI:2147954]	-	-
ENSMUSG00000008489	26.1145	26.0136	43.8906	44.6164	41.5397	107.293	127.061	149.072	172.029	96.9862	36.435	130.488	-1.83738	4.53832e-11	2.01275e-08	Elavl2	4	91250763	91400785	-	8313	protein_coding	ELAV like RNA binding protein 1 [Source:MGI Symbol;Acc:MGI:1100887]	-	-
ENSMUSG00000034758	415.458	382.497	489.78	459.974	559.337	758.999	947.181	1120	1013.5	956.756	461.409	959.287	-1.05554	4.6212e-11	2.01275e-08	Tle6	10	81590904	81601073	-	3088	protein_coding	transducin-like enhancer of split 6 [Source:MGI Symbol;Acc:MGI:2149593]	-	-
ENSMUSG00000046323	1.18702	26.9771	22.9428	38.2427	39.6076	104.313	225.244	356.989	233.96	179.119	25.7914	219.925	-3.08547	4.92041e-11	2.10338e-08	Dppa3	6	122626410	122630272	+	892	protein_coding	developmental pluripotency-associated 3 [Source:MGI Symbol;Acc:MGI:1920958]	-	-
ENSMUSG00000073294	91.4007	57.8081	111.722	129.6	118.823	299.03	263.748	285.395	294.907	249.892	101.871	278.594	-1.45156	5.29274e-11	2.22141e-08	AU022751	X	6081219	6083419	-	2201	protein_coding	expressed sequence AU022751 [Source:MGI Symbol;Acc:MGI:2147968]	-	-
ENSMUSG00000028591	23.7404	14.452	25.9354	49.9279	67.6227	180.809	199.255	164.764	183.826	151.159	36.3357	175.962	-2.27328	6.4619e-11	2.66369e-08	Pramef12	4	144391674	144408464	-	2573	protein_coding	PRAME family member 12 [Source:MGI Symbol;Acc:MGI:1924882]	-	-
ENSMUSG00000062151	3.56107	5.78081	12.9677	22.3082	14.4906	65.5679	105.884	97.0931	53.0833	75.1425	11.8217	79.3542	-2.74134	1.41567e-10	5.7332e-08	Unc13c	9	73479422	73968966	-	8796	protein_coding	unc-13 homolog C [Source:MGI Symbol;Acc:MGI:2149021]	-	-
ENSMUSG00000042279	66.4732	41.4291	37.9055	110.479	169.057	364.598	398.509	405.045	384.363	372.217	85.0687	384.946	-2.17712	2.03362e-10	8.09381e-08	H1foo	6	115944938	115950236	+	1201	protein_coding	H1 histone family, member O, oocyte-specific [Source:MGI Symbol;Acc:MGI:2176207]	-	-
ENSMUSG00000038925	97.3358	30.831	95.7614	82.8591	108.196	288.102	250.271	306.971	256.569	296.201	82.9967	279.623	-1.75401	2.07287e-10	8.1102e-08	E330034G19Rik	14	24293214	24309966	+	1824	protein_coding	RIKEN cDNA E330034G19 gene [Source:MGI Symbol;Acc:MGI:2145557]	-	-
ENSMUSG00000025094	462.939	536.652	300.252	1053.8	816.303	1192.14	2272.66	3470.83	2761.32	3686.35	633.989	2676.66	-2.0779	2.97995e-10	1.14649e-07	Slc18a2	19	59260878	59296012	+	3803	protein_coding	solute carrier family 18 (vesicular monoamine), member 2 [Source:MGI Symbol;Acc:MGI:106677]	-	-
ENSMUSG00000074895	21.3664	10.5981	29.9254	75.423	63.7586	177.828	282.999	288.337	197.588	219.311	40.2143	233.213	-2.53503	3.131e-10	1.18485e-07	Eif4e1b	13	54783998	54788459	+	2255	protein_coding	eukaryotic translation initiation factor 4E family member 1B [Source:MGI Symbol;Acc:MGI:2685119]	-	-
ENSMUSG00000030494	113.954	100.201	191.523	115.79	143.94	964.644	350.38	519.791	350.94	346.005	133.082	506.352	-1.92702	3.74215e-10	1.39329e-07	Rhpn2	7	35334170	35392289	+	6304	protein_coding	rhophilin, Rho GTPase binding protein 2 [Source:MGI Symbol;Acc:MGI:1289234]	-	-
ENSMUSG00000029361	3.56107	19.2694	9.97514	18.059	9.66039	68.5483	68.3433	65.7095	52.1003	71.6475	12.105	65.2698	-2.41907	4.28798e-10	1.57117e-07	Nos1	5	117781032	117958840	+	11151	protein_coding	nitric oxide synthase 1, neuronal [Source:MGI Symbol;Acc:MGI:97360]	-	-
novel.1067	9.49618	1.92694	2.99254	3.18689	7.72831	34.7709	35.6155	79.4398	40.304	45.435	5.06617	47.113	-3.23623	4.41e-10	1.59063e-07	-	9	120787038	120789798	-	2425	-	- && - && -	-	-
ENSMUSG00000104667	0	0.963468	5.98509	6.37378	8.69435	44.7054	39.4659	80.4205	48.1682	35.8237	4.40334	49.7168	-3.47599	7.00508e-10	2.48777e-07	Gm4961	5	30092940	30097686	+	2249	lincRNA	predicted pseudogene 4961 [Source:MGI Symbol;Acc:MGI:3645260]	-	-
ENSMUSG00000045291	46.2939	35.6483	66.8335	52.0525	83.0793	197.697	162.676	159.86	137.623	200.962	56.7815	171.764	-1.59487	7.44251e-10	2.60307e-07	E330021D16Rik	6	136400317	136415569	-	1832	protein_coding	RIKEN cDNA E330021D16 gene [Source:MGI Symbol;Acc:MGI:2141773]	-	-
ENSMUSG00000045036	0	0	0.997514	4.24919	1.93208	332.807	84.7072	105.92	33.4228	27.96	1.43576	116.963	-6.34425	7.60512e-10	2.62025e-07	Tmem232	17	65255999	65540782	-	3134	protein_coding	transmembrane protein 232 [Source:MGI Symbol;Acc:MGI:2685786]	-	-
ENSMUSG00000020216	33.2366	35.6483	31.9205	44.6164	76.3171	143.057	119.36	194.186	135.657	177.371	44.3478	153.926	-1.79192	7.81334e-10	2.6524e-07	Jsrp1	10	80808496	80813498	-	1333	protein_coding	junctional sarcoplasmic reticulum protein 1 [Source:MGI Symbol;Acc:MGI:1916700]	-	-
ENSMUSG00000038770	2.37404	26.9771	31.9205	48.8656	41.5397	219.553	121.285	243.223	155.318	197.467	30.3354	187.369	-2.62115	9.59022e-10	3.20841e-07	Kpna7	5	144983519	145084030	-	3135	protein_coding	karyopherin alpha 7 (importin alpha 8) [Source:MGI Symbol;Acc:MGI:2141165]	-	-
ENSMUSG00000067750	7.12213	3.85387	0.997514	18.059	11.5925	36.7578	64.493	154.957	80.608	75.1425	8.325	82.3916	-3.31156	1.33503e-09	4.40255e-07	Khdc1a	1	21349641	21352200	+	1987	protein_coding	KH domain containing 1A [Source:MGI Symbol;Acc:MGI:2676610]	-	-
ENSMUSG00000079259	3.56107	3.85387	9.97514	6.37378	5.79623	24.8363	61.6053	50.9984	56.0324	32.3287	5.91202	45.1602	-2.92552	1.46497e-09	4.76301e-07	Trim71	9	114507133	114564369	-	9332	protein_coding	tripartite motif-containing 71 [Source:MGI Symbol;Acc:MGI:2685973]	Others	Others
ENSMUSG00000074369	60.5381	38.5387	69.826	140.223	75.351	303.997	238.72	332.47	195.622	297.075	76.8954	273.577	-1.83206	1.50744e-09	4.83301e-07	Obox2	7	15388721	15398545	+	1646	protein_coding	oocyte specific homeobox 2 [Source:MGI Symbol;Acc:MGI:2149033]	HB-other	HB->HB-other
ENSMUSG00000096225	0	4.81734	10.9727	15.9344	9.66039	51.6596	67.3808	104.939	47.1852	64.6575	8.27697	67.1644	-3.00958	1.8509e-09	5.85289e-07	Lhx8	3	154306294	154330659	-	2532	protein_coding	LIM homeobox protein 8 [Source:MGI Symbol;Acc:MGI:1096343]	LIM	LIM
ENSMUSG00000040728	16.6183	26.0136	87.7813	95.6067	51.2001	678.529	254.122	476.639	172.029	226.301	55.444	361.524	-2.70348	1.9294e-09	6.01869e-07	Esrp1	4	11331933	11386783	-	6305	protein_coding	epithelial splicing regulatory protein 1 [Source:MGI Symbol;Acc:MGI:1917326]	-	-
ENSMUSG00000049314	4.74809	1.92694	4.98757	11.6853	4.83019	19.8691	53.9046	61.7865	48.1682	56.7937	5.63561	48.1044	-3.10312	2.11386e-09	6.50618e-07	Fbxw13	9	109179227	109195975	-	1513	protein_coding	F-box and WD-40 domain protein 13 [Source:MGI Symbol;Acc:MGI:3505590]	-	-
ENSMUSG00000090254	49.8549	18.3059	51.8707	67.987	75.351	166.9	176.153	211.839	162.199	224.554	52.6739	188.329	-1.83919	2.61426e-09	7.94049e-07	Gm1965	6	89140994	89147388	+	2451	lincRNA	predicted gene 1965 [Source:MGI Symbol;Acc:MGI:3584270]	-	-
ENSMUSG00000025081	13.0572	15.4155	43.8906	62.6755	56.9963	250.35	177.115	172.61	159.25	161.644	38.407	184.194	-2.25848	2.75062e-09	8.24615e-07	Tdrd1	19	56826209	56870012	+	5443	protein_coding	tudor domain containing 1 [Source:MGI Symbol;Acc:MGI:1933218]	-	-
ENSMUSG00000074061	0	21.1963	11.9702	25.4951	31.8793	56.6269	138.612	227.531	156.301	194.846	18.1082	154.783	-3.08732	4.048e-09	1.198e-06	Fbxw19	9	109476654	109495875	-	3487	protein_coding	F-box and WD-40 domain protein 19 [Source:MGI Symbol;Acc:MGI:3505706]	-	-
ENSMUSG00000028078	102.084	91.5295	109.727	128.538	153.6	321.879	284.924	305.99	193.656	291.832	117.096	279.656	-1.25519	4.31244e-09	1.26011e-06	Dclk2	3	86786151	86920852	-	10553	protein_coding	doublecortin-like kinase 2 [Source:MGI Symbol;Acc:MGI:1918012]	-	-
ENSMUSG00000015721	20.1794	40.4657	28.9279	181.653	131.381	560.308	1004.94	1471.11	813.944	1023.16	80.5214	974.691	-3.59702	5.46339e-09	1.57646e-06	Nlrp5	7	23385889	23441922	+	4847	protein_coding	NLR family, pyrin domain containing 5 [Source:MGI Symbol;Acc:MGI:1345193]	-	-
ENSMUSG00000105589	18.9924	12.5251	14.9627	52.0525	27.0491	50.6661	126.098	174.571	205.452	156.401	25.1164	142.638	-2.50768	6.01464e-09	1.7141e-06	Fbxw14	9	109270790	109287676	-	2114	protein_coding	F-box and WD-40 domain protein 14 [Source:MGI Symbol;Acc:MGI:1354703]	-	-
ENSMUSG00000046637	3.56107	0.963468	8.97763	6.37378	3.86416	276.18	33.6904	88.2664	21.6265	21.8437	4.74802	88.3215	-4.2175	6.4454e-09	1.81446e-06	Ttc34	4	154837459	154867127	+	4949	protein_coding	tetratricopeptide repeat domain 34 [Source:MGI Symbol;Acc:MGI:2445205]	-	-
ENSMUSG00000041722	0	5.78081	8.97763	12.7476	12.5585	24.8363	85.6698	76.4976	57.0154	105.724	8.0129	69.9486	-3.11344	7.56945e-09	2.10522e-06	Khdc1c	1	21368331	21370845	+	1946	protein_coding	KH domain containing 1C [Source:MGI Symbol;Acc:MGI:3583007]	-	-
ENSMUSG00000068122	21.3664	75.1505	56.8583	18.059	68.5888	208.625	142.462	203.013	247.722	208.826	48.0046	202.13	-2.06753	8.68823e-09	2.38761e-06	Agtr2	X	21484544	21489164	+	3326	protein_coding	angiotensin II receptor, type 2 [Source:MGI Symbol;Acc:MGI:87966]	-	-
ENSMUSG00000021255	9.49618	0.963468	3.99006	3.18689	7.72831	23.8429	58.7175	39.2295	41.287	43.6875	5.07298	41.3529	-3.04714	8.91006e-09	2.41976e-06	Esrrb	12	86361117	86521628	+	6047	protein_coding	estrogen related receptor, beta [Source:MGI Symbol;Acc:MGI:1346832]	-	-
ENSMUSG00000047799	8.30916	20.2328	5.98509	56.3017	34.7774	111.267	164.602	179.475	176.944	135.431	25.1212	153.544	-2.60945	9.06835e-09	2.43412e-06	Oog4	4	143437164	143450324	-	1981	protein_coding	oogenesin 4 [Source:MGI Symbol;Acc:MGI:2684051]	-	-
ENSMUSG00000073018	28.4885	14.452	65.8359	58.4263	68.5888	231.475	180.003	161.822	170.063	193.099	47.1583	187.292	-1.98776	1.0481e-08	2.78096e-06	Gm1070	6	71293765	71302880	+	2874	lincRNA	predicted gene 1070 [Source:MGI Symbol;Acc:MGI:2685916]	-	-
ENSMUSG00000030911	14.2443	73.2236	47.8807	223.082	121.721	472.884	1203.23	1721.2	1286.78	1247.71	96.0303	1186.36	-3.62645	1.17988e-08	3.09503e-06	Zp2	7	120126772	120145291	-	2724	protein_coding	zona pellucida glycoprotein 2 [Source:MGI Symbol;Acc:MGI:99214]	-	-
ENSMUSG00000058248	59.3511	66.4793	62.8434	66.9247	81.1473	172.861	174.227	156.918	115.014	156.401	67.3491	155.084	-1.20132	1.29259e-08	3.35261e-06	Kcnh1	1	192190774	192510159	+	7331	protein_coding	potassium voltage-gated channel, subfamily H (eag-related), member 1 [Source:MGI Symbol;Acc:MGI:1341721]	-	-
ENSMUSG00000038750	40.3588	21.1963	14.9627	39.305	40.5736	101.332	80.8569	139.265	115.014	110.966	31.2793	109.487	-1.81237	1.33865e-08	3.43349e-06	Omt2b	9	78327589	78329620	+	1546	protein_coding	oocyte maturation, beta [Source:MGI Symbol;Acc:MGI:106619]	-	-
ENSMUSG00000090891	54.603	43.3561	98.7539	92.4198	141.042	324.859	249.309	375.623	243.79	210.574	86.0349	280.831	-1.70448	2.25223e-08	5.71325e-06	D6Ertd527e	6	87104746	87112997	+	2415	protein_coding	DNA segment, Chr 6, ERATO Doi 527, expressed [Source:MGI Symbol;Acc:MGI:1261919]	-	-
ENSMUSG00000092622	8.30916	4.81734	0.997514	0	2.89812	7.94763	37.5407	62.7672	73.7268	78.6375	3.40443	52.124	-3.95853	2.80872e-08	7.04745e-06	Khdc3	9	73101836	73104438	+	2050	protein_coding	KH domain containing 3, subcortical maternal complex member [Source:MGI Symbol;Acc:MGI:1914241]	-	-
ENSMUSG00000040640	10.6832	10.5981	12.9677	6.37378	4.83019	58.6138	32.7278	40.2103	46.2022	43.6875	9.0906	44.2883	-2.28681	2.85371e-08	7.08334e-06	Erc2	14	27622428	28478537	+	9728	protein_coding	ELKS/RAB6-interacting/CAST family member 2 [Source:MGI Symbol;Acc:MGI:1098749]	-	-
ENSMUSG00000037159	27.3015	10.5981	39.9006	62.6755	43.4718	126.169	136.687	142.207	138.606	159.896	36.7895	140.713	-1.93645	2.90258e-08	7.10917e-06	Wee2	6	40439088	40466813	+	3140	protein_coding	WEE1 homolog 2 (S. pombe) [Source:MGI Symbol;Acc:MGI:3027899]	-	-
ENSMUSG00000027233	0	0	0	1.0623	7.72831	50.6661	20.2142	81.4013	19.6605	52.425	1.75812	44.8734	-4.63406	2.92571e-08	7.10917e-06	Patl2	2	122120108	122186189	-	2434	protein_coding	protein associated with topoisomerase II homolog 2 (yeast) [Source:MGI Symbol;Acc:MGI:1914828]	-	-
ENSMUSG00000096576	4.74809	2.8904	8.97763	9.56067	13.5245	42.7185	37.5407	34.3258	56.0324	49.8037	7.94027	44.0842	-2.46604	3.29841e-08	7.93131e-06	Oog1	12	87602688	87608850	+	2451	protein_coding	oogenesin 1 [Source:MGI Symbol;Acc:MGI:2679150]	-	-
ENSMUSG00000028825	2.37404	2.8904	2.99254	3.18689	7.72831	20.8625	24.0646	41.191	30.4738	41.0662	3.83444	31.5316	-3.02496	3.69892e-08	8.80267e-06	Rhd	4	134864536	134896172	+	1594	protein_coding	Rh blood group, D antigen [Source:MGI Symbol;Acc:MGI:1202882]	-	-
ENSMUSG00000107740	3.56107	7.70774	8.97763	20.1836	19.3208	38.7447	50.0543	86.305	92.4043	69.9	11.9502	67.4816	-2.48979	3.97101e-08	9.35376e-06	Gm18765	6	50627680	50628339	-	660	processed_pseudogene	predicted gene, 18765 [Source:MGI Symbol;Acc:MGI:5010950]	-	-
ENSMUSG00000041995	1125.3	1003.93	1197.02	1545.64	1634.54	2248.19	2288.06	3122.67	2479.19	2435.14	1301.29	2514.65	-0.950324	4.07362e-08	9.49852e-06	Zbed3	13	95323612	95337841	+	2231	protein_coding	zinc finger, BED type containing 3 [Source:MGI Symbol;Acc:MGI:1919364]	-	-
ENSMUSG00000063935	29.6756	27.9406	46.8832	108.354	146.838	201.671	327.278	444.274	316.534	366.975	71.9383	331.346	-2.20182	6.0653e-08	1.40011e-05	Zar1	5	72576806	72581254	-	3465	protein_coding	zygote arrest 1 [Source:MGI Symbol;Acc:MGI:2180337]	-	-
ENSMUSG00000020255	872.461	737.053	789.034	916.762	823.065	1511.04	1330.29	1354.4	1167.83	1264.32	827.675	1325.58	-0.679792	6.17656e-08	1.41168e-05	D10Wsu102e	10	83360221	83488505	+	123179	protein_coding	DNA segment, Chr 10, Wayne State University 102, expressed [Source:MGI Symbol;Acc:MGI:106381]	-	-
ENSMUSG00000053490	5.93511	11.5616	8.97763	23.3705	14.4906	102.326	80.8569	53.9406	37.3549	51.5512	12.8671	65.2059	-2.33675	6.62996e-08	1.50045e-05	Trim60	8	64999307	65018584	-	2670	protein_coding	tripartite motif-containing 60 [Source:MGI Symbol;Acc:MGI:2387430]	Others	Others
ENSMUSG00000061701	4.74809	2.8904	9.97514	20.1836	17.3887	39.7382	101.071	88.2664	54.0663	56.7937	11.0372	67.9872	-2.61932	6.97266e-08	1.56269e-05	Fbxw20	9	109217432	109234754	-	2429	protein_coding	F-box and WD-40 domain protein 20 [Source:MGI Symbol;Acc:MGI:3584372]	-	-
ENSMUSG00000068302	8.30916	0	4.98757	12.7476	1.93208	40.7316	51.0169	70.6132	34.4059	41.0662	5.59527	47.5667	-3.11233	7.24039e-08	1.59506e-05	Noto	6	85423886	85428877	+	1602	protein_coding	notochord homeobox [Source:MGI Symbol;Acc:MGI:3053002]	HB-other	HB->HB-other
ENSMUSG00000074731	0	11.5616	1.99503	10.623	4.83019	31.7905	48.1291	45.114	47.1852	55.0462	5.80196	45.453	-2.95289	7.2553e-08	1.59506e-05	Zfp345	2	150470991	150485091	-	2734	protein_coding	zinc finger protein 345 [Source:MGI Symbol;Acc:MGI:3652219]	C2H2	C2H2
ENSMUSG00000047911	10.6832	43.3561	24.9379	72.2361	72.4529	86.4305	249.309	286.376	240.841	254.261	44.7332	223.443	-2.31727	7.36072e-08	1.60297e-05	Npm2	14	70647302	70659244	-	1036	protein_coding	nucleophosmin/nucleoplasmin 2 [Source:MGI Symbol;Acc:MGI:1890811]	-	-
ENSMUSG00000044726	2.37404	2.8904	0.997514	6.37378	4.83019	24.8363	16.3639	41.191	53.0833	27.96	3.49319	32.6869	-3.22392	7.65811e-08	1.65215e-05	Erich5	15	34453305	34473892	+	2383	protein_coding	glutamate rich 5 [Source:MGI Symbol;Acc:MGI:2447772]	-	-
ENSMUSG00000055945	7.12213	11.5616	9.97514	9.56067	16.4227	329.827	79.8943	59.825	31.4568	27.96	10.9284	105.793	-3.26945	7.96677e-08	1.70282e-05	Prr18	17	8337459	8344113	+	3656	protein_coding	proline rich 18 [Source:MGI Symbol;Acc:MGI:2443403]	-	-
ENSMUSG00000087193	0	3.85387	0	0	6.76227	47.6858	29.8401	30.4029	29.4907	25.3387	2.12323	32.5516	-3.88613	1.05139e-07	2.22663e-05	Gm14820	X	8042943	8074619	+	2096	antisense	predicted gene 14820 [Source:MGI Symbol;Acc:MGI:3713695]	-	-
ENSMUSG00000059547	7.12213	8.67121	25.9354	23.3705	16.4227	54.64	39.4659	126.515	91.4213	91.7437	16.3044	80.7572	-2.30439	1.43201e-07	3.00513e-05	Fbxw26	9	109717566	109746089	-	1824	protein_coding	F-box and WD-40 domain protein 26 [Source:MGI Symbol;Acc:MGI:3646662]	-	-
ENSMUSG00000102629	2.37404	1.92694	0	3.18689	0.966039	10.928	17.3265	25.4992	34.4059	39.3187	1.69078	25.4957	-3.94118	1.51827e-07	3.15745e-05	Gm29999	3	82660375	82664900	-	2977	processed_transcript	predicted gene, 29999 [Source:MGI Symbol;Acc:MGI:5589158]	-	-
ENSMUSG00000028865	4.74809	11.5616	22.9428	28.682	28.9812	48.6792	98.1834	99.0546	95.3534	94.3649	19.3831	87.1271	-2.16139	1.57028e-07	3.23646e-05	Cd164l2	4	133212131	133224555	+	1827	protein_coding	CD164 sialomucin-like 2 [Source:MGI Symbol;Acc:MGI:1916905]	-	-
ENSMUSG00000073721	0	2.8904	0	9.56067	7.72831	15.8953	46.204	67.6709	83.5571	41.94	4.03588	51.0534	-3.64949	1.615e-07	3.29918e-05	Pramef20	4	144372760	144377933	-	1434	protein_coding	PRAME family member 20 [Source:MGI Symbol;Acc:MGI:3712553]	-	-
ENSMUSG00000102887	2.37404	0	4.98757	5.31148	3.86416	31.7905	25.9897	28.4414	28.5077	20.97	3.30745	27.1399	-3.03866	2.08296e-07	4.21782e-05	Gm10857	2	6132869	6140568	+	2794	lincRNA	predicted gene 10857 [Source:MGI Symbol;Acc:MGI:3641733]	-	-
ENSMUSG00000105416	0	1.92694	1.99503	3.18689	5.79623	40.7316	20.2142	24.5185	18.6775	28.8337	2.58102	26.5951	-3.33389	2.23641e-07	4.46805e-05	Gm42553	5	43059255	43060883	+	1629	TEC	predicted gene 42553 [Source:MGI Symbol;Acc:MGI:5662690]	-	-
ENSMUSG00000005202	0	4.81734	0	13.8099	10.6264	52.6531	47.1665	73.5554	57.9984	42.8137	5.85072	54.8374	-3.2178	2.24525e-07	4.46805e-05	Shbg	11	69614804	69617905	-	1506	protein_coding	sex hormone binding globulin [Source:MGI Symbol;Acc:MGI:98295]	-	-
ENSMUSG00000041359	87.8396	34.6848	59.8509	123.226	121.721	227.501	205.03	309.913	259.518	276.105	85.4645	255.614	-1.58181	2.41829e-07	4.77127e-05	Tcl1	12	105216750	105222793	-	1845	protein_coding	T cell lymphoma breakpoint 1 [Source:MGI Symbol;Acc:MGI:1097166]	-	-
ENSMUSG00000066031	10.6832	15.4155	38.9031	90.2952	55.0642	91.3977	209.843	329.528	229.045	250.766	42.0722	222.116	-2.39913	2.87212e-07	5.58209e-05	Gm13023	4	143789352	143795575	+	1810	protein_coding	predicted gene 13023 [Source:MGI Symbol;Acc:MGI:3650478]	-	-
ENSMUSG00000036123	9.49618	23.1232	12.9677	46.741	22.2189	123.188	69.3059	59.825	114.031	130.189	22.9094	99.3078	-2.11406	2.87762e-07	5.58209e-05	Slc9a3	13	74121457	74169442	+	5504	protein_coding	solute carrier family 9 (sodium/hydrogen exchanger), member 3 [Source:MGI Symbol;Acc:MGI:105064]	-	-
ENSMUSG00000004948	27.3015	46.2465	46.8832	178.466	130.415	213.593	681.508	1196.5	674.355	686.767	85.8624	690.545	-3.00717	3.11452e-07	5.9913e-05	Zp3	5	135980099	135988624	+	1323	protein_coding	zona pellucida glycoprotein 3 [Source:MGI Symbol;Acc:MGI:99215]	-	-
ENSMUSG00000034112	14.2443	11.5616	27.9304	4.24919	12.5585	122.195	48.1291	77.4783	48.1682	58.5412	14.1088	70.9023	-2.32615	3.15875e-07	6.02616e-05	Atp2c2	8	119700009	119757717	+	3222	protein_coding	ATPase, Ca++ transporting, type 2C, member 2 [Source:MGI Symbol;Acc:MGI:1916297]	-	-
ENSMUSG00000054134	29.6756	13.4886	49.8757	71.1739	53.1321	126.169	128.023	181.437	145.488	173.002	43.4692	150.824	-1.79496	3.25542e-07	6.15969e-05	Umodl1	17	30954679	31010708	+	5045	protein_coding	uromodulin-like 1 [Source:MGI Symbol;Acc:MGI:1929785]	-	-
ENSMUSG00000023968	3.56107	3.85387	10.9727	1.0623	13.5245	38.7447	42.3536	61.7865	39.321	33.2025	6.59489	43.0817	-2.6902	3.56766e-07	6.69561e-05	Crip3	17	46428926	46431776	+	1520	protein_coding	cysteine-rich protein 3 [Source:MGI Symbol;Acc:MGI:2152434]	LIM	LIM
ENSMUSG00000060461	4.74809	2.8904	0	11.6853	13.5245	13.9084	71.2311	138.284	77.6589	47.1825	6.56966	69.653	-3.40499	3.73657e-07	6.95605e-05	Dppa5a	9	78367052	78368177	-	619	protein_coding	developmental pluripotency associated 5A [Source:MGI Symbol;Acc:MGI:101800]	-	-
ENSMUSG00000070686	15.4313	30.831	34.913	53.1148	28.9812	93.3847	124.173	67.6709	114.031	116.209	32.6542	103.094	-1.6558	3.79032e-07	6.99967e-05	C87414	5	93634993	93671551	-	2966	protein_coding	expressed sequence C87414 [Source:MGI Symbol;Acc:MGI:2141341]	-	-
ENSMUSG00000025082	3.56107	2.8904	0	9.56067	3.86416	42.7185	30.8026	27.4607	27.5247	27.0862	3.97526	31.1185	-2.97962	3.90972e-07	7.16286e-05	Vwa2	19	56874249	56912078	+	4049	protein_coding	von Willebrand factor A domain containing 2 [Source:MGI Symbol;Acc:MGI:2684334]	-	-
ENSMUSG00000034311	316.935	259.173	238.406	296.381	312.031	414.27	514.019	456.043	590.798	514.638	284.585	497.954	-0.80804	4.15439e-07	7.55118e-05	Kif4	X	100625737	100727214	+	5514	protein_coding	kinesin family member 4 [Source:MGI Symbol;Acc:MGI:108389]	-	-
ENSMUSG00000069041	4.74809	3.85387	6.9826	12.7476	5.79623	19.8691	47.1665	42.1717	31.4568	46.3087	6.82567	37.3946	-2.45773	4.43637e-07	7.96214e-05	Slc25a31	3	40708855	40726096	+	2128	protein_coding	solute carrier family 25 (mitochondrial carrier; adenine nucleotide translocator), member 31 [Source:MGI Symbol;Acc:MGI:1920583]	-	-
ENSMUSG00000027547	11.8702	14.452	22.9428	12.7476	23.1849	42.7185	58.7175	51.9791	66.8457	62.91	17.0395	56.6342	-1.72537	4.46098e-07	7.96214e-05	Sall4	2	168748332	168767943	-	5536	protein_coding	spalt like transcription factor 4 [Source:MGI Symbol;Acc:MGI:2139360]	C2H2	C2H2
ENSMUSG00000070617	2.37404	0.963468	0.997514	7.43607	6.76227	29.8036	29.8401	29.4221	28.5077	25.3387	3.70667	28.5825	-2.94655	4.48396e-07	7.96214e-05	Gm13089	4	143696500	143702711	-	1807	protein_coding	predicted gene 13089 [Source:MGI Symbol;Acc:MGI:3649972]	-	-
ENSMUSG00000091358	14.2443	8.67121	2.99254	16.9967	27.0491	38.7447	54.8672	145.149	71.7608	83.88	13.9908	78.8804	-2.49533	5.25453e-07	9.25921e-05	Speer5-ps1	10	44169911	44219583	+	8634	transcribed_processed_pseudogene	spermatogenesis associated glutamate (E)-rich protein 5, pseudogene 1 [Source:MGI Symbol;Acc:MGI:1917615]	-	-
ENSMUSG00000048038	32.0496	64.5524	67.831	61.6132	65.6906	778.868	229.095	199.09	153.352	85.6275	58.3474	289.206	-2.3073	6.0025e-07	0.000104971	Ccdc187	2	26243469	26294557	-	9827	protein_coding	coiled-coil domain containing 187 [Source:MGI Symbol;Acc:MGI:3045295]	-	-
ENSMUSG00000021125	16.6183	13.4886	23.9403	18.059	4.83019	70.5352	59.6801	77.4783	53.0833	41.94	15.3873	60.5434	-1.9798	6.22175e-07	0.000107987	Arg2	12	79130777	79156301	+	1428	protein_coding	arginase type II [Source:MGI Symbol;Acc:MGI:1330806]	-	-
ENSMUSG00000068522	60.5381	36.6118	24.9379	48.8656	131.381	123.188	202.142	346.201	230.028	283.095	60.4669	236.931	-1.96953	6.77392e-07	0.000116693	Aard	15	52040107	52045722	+	1348	protein_coding	alanine and arginine rich domain containing protein [Source:MGI Symbol;Acc:MGI:2181621]	-	-
ENSMUSG00000031289	4.74809	13.4886	10.9727	30.8066	30.9132	47.6858	81.8195	148.091	57.9984	143.295	18.1858	95.778	-2.39206	7.1921e-07	0.00012298	Il13ra2	X	147383476	147429192	-	2281	protein_coding	interleukin 13 receptor, alpha 2 [Source:MGI Symbol;Acc:MGI:1277954]	-	-
ENSMUSG00000074366	43.9198	23.1232	55.8608	94.5444	74.385	151.998	127.061	250.088	215.282	178.245	58.3666	184.535	-1.6608	7.85095e-07	0.000133099	Obox5	7	15750131	15759800	+	2136	protein_coding	oocyte specific homeobox 5 [Source:MGI Symbol;Acc:MGI:2149035]	HB-other	HB->HB-other
ENSMUSG00000051727	1880.24	1714.01	1437.42	2539.95	1415.25	4001.63	2867.53	2885.33	3564.45	4633.49	1797.37	3590.49	-0.998475	7.89923e-07	0.000133099	Kctd14	7	97451323	97459557	+	2568	protein_coding	potassium channel tetramerisation domain containing 14 [Source:MGI Symbol;Acc:MGI:1289222]	-	-
ENSMUSG00000054102	17.8053	13.4886	11.9702	42.4919	51.2001	70.5352	113.585	136.323	104.201	124.072	27.3912	109.743	-2.00067	8.61538e-07	0.000144114	Nlrp9a	7	26535023	26575615	+	3483	protein_coding	NLR family, pyrin domain containing 9A [Source:MGI Symbol;Acc:MGI:2675292]	-	-
ENSMUSG00000032191	140.069	53.9542	93.7663	150.846	196.106	377.512	342.679	319.721	299.822	322.414	126.948	332.43	-1.38956	8.78809e-07	0.000145945	Bcl2l10	9	75347758	75351632	+	1220	protein_coding	Bcl2-like 10 [Source:MGI Symbol;Acc:MGI:1330841]	-	-
ENSMUSG00000036036	313.374	289.04	323.195	386.676	520.695	537.458	676.695	862.069	845.401	758.415	366.596	736.008	-1.00511	8.99772e-07	0.000148359	Zfp57	17	37001163	37010635	+	3786	protein_coding	zinc finger protein 57 [Source:MGI Symbol;Acc:MGI:99204]	C2H2	C2H2
ENSMUSG00000022432	5.93511	6.74428	1.99503	6.37378	8.69435	33.7774	22.1394	24.5185	37.3549	40.1925	5.94851	31.5965	-2.408	9.19397e-07	0.00015052	Smc1b	15	85064689	85131964	-	4047	protein_coding	structural maintenance of chromosomes 1B [Source:MGI Symbol;Acc:MGI:2154049]	-	-
ENSMUSG00000003354	4.74809	10.5981	9.97514	2.12459	6.76227	231.475	53.9046	129.457	5.89815	14.8537	6.84165	87.1177	-3.66312	9.45925e-07	0.000153773	Ccdc65	15	98708207	98723336	+	1992	protein_coding	coiled-coil domain containing 65 [Source:MGI Symbol;Acc:MGI:2146001]	-	-
ENSMUSG00000031028	27.3015	31.7944	26.9329	48.8656	46.3699	93.3847	71.2311	139.265	116.98	83.88	36.2529	100.948	-1.47493	9.77673e-07	0.000157822	Tub	7	108950338	109034460	+	8391	protein_coding	tubby bipartite transcription factor [Source:MGI Symbol;Acc:MGI:2651573]	-	-
ENSMUSG00000022518	15.4313	5.78081	3.99006	7.43607	13.5245	24.8363	54.8672	41.191	69.7947	38.445	9.23255	45.8269	-2.32188	1.01641e-06	0.000162936	4930562C15Rik	16	4835416	4867686	+	5312	protein_coding	RIKEN cDNA 4930562C15 gene [Source:MGI Symbol;Acc:MGI:1926059]	-	-
ENSMUSG00000094791	3.56107	6.74428	22.9428	11.6853	25.117	70.5352	59.6801	75.5168	50.1343	61.1625	14.0101	63.4058	-2.1661	1.02485e-06	0.000163156	AC126035.1	JH584299.1	314841	317584	+	837	protein_coding		-	-
ENSMUSG00000048626	10.6832	11.5616	32.918	31.8689	15.4566	72.5221	84.7072	85.3242	55.0494	67.2787	20.4977	72.9763	-1.82968	1.06613e-06	0.000168565	Klf17	4	117757836	117765648	-	2400	protein_coding	Kruppel-like factor 17 [Source:MGI Symbol;Acc:MGI:2181068]	C2H2	C2H2
novel.163	0	0	0	0	0	2.98036	14.4387	28.4414	9.83025	10.485	0	13.2351	-6.12326	1.08488e-06	0.000170363	-	11	7744819	7746082	-	1264	-	- && - && -	-	-
ENSMUSG00000028654	429.702	209.073	265.339	735.109	819.201	1405.74	1604.62	2100.74	959.432	1512.46	491.685	1516.6	-1.62507	1.16788e-06	0.000182158	Mycl	4	122995652	123002485	+	4038	protein_coding	v-myc avian myelocytomatosis viral oncogene lung carcinoma derived [Source:MGI Symbol;Acc:MGI:96799]	bHLH	bHLH
ENSMUSG00000054446	13.0572	2.8904	14.9627	13.8099	33.8114	30.7971	119.36	106.9	105.184	68.1525	15.7063	86.0788	-2.45159	1.17646e-06	0.000182265	Cpa1	6	30639218	30645363	+	1750	protein_coding	carboxypeptidase A1, pancreatic [Source:MGI Symbol;Acc:MGI:88478]	-	-
ENSMUSG00000059625	0	0	0	0	0	6.95418	8.66324	4.90369	20.6435	20.0962	0	12.2522	-6.01395	1.26578e-06	0.000194795	Sohlh1	2	25842995	25847248	-	1289	protein_coding	spermatogenesis and oogenesis specific basic helix-loop-helix 1 [Source:MGI Symbol;Acc:MGI:2684956]	bHLH	bHLH
ENSMUSG00000061802	1.18702	0.963468	1.99503	1.0623	0	308.964	55.8298	26.4799	6.88117	4.36875	1.04156	80.5048	-6.27878	1.3465e-06	0.000205845	Armc4	18	7088233	7297901	-	3477	protein_coding	armadillo repeat containing 4 [Source:MGI Symbol;Acc:MGI:1922184]	-	-
ENSMUSG00000104781	0	1.92694	0	1.0623	6.76227	17.8822	23.102	20.5955	31.4568	30.5812	1.9503	24.7235	-3.62005	1.36517e-06	0.000207325	Gm43303	5	45192669	45251929	-	669	lincRNA	predicted gene 43303 [Source:MGI Symbol;Acc:MGI:5663440]	-	-
ENSMUSG00000111167	0	0	0	0	0	13.9084	8.66324	8.82664	13.7623	7.86375	0	10.6049	-5.80261	1.41715e-06	0.000213814	Gm39321	9	42141993	42146506	+	3605	lincRNA	predicted gene, 39321 [Source:MGI Symbol;Acc:MGI:5622206]	-	-
ENSMUSG00000055933	20.1794	19.2694	21.9453	25.4951	12.5585	35.7643	58.7175	60.8058	87.4892	81.2587	19.8895	64.8071	-1.70807	1.51236e-06	0.000226697	Oosp3	19	11697055	11711874	+	823	protein_coding	oocyte secreted protein 3 [Source:MGI Symbol;Acc:MGI:2684943]	-	-
ENSMUSG00000041708	0	3.85387	1.99503	4.24919	1.93208	13.9084	18.2891	31.3836	29.4907	19.2225	2.40603	22.4589	-3.19888	1.62475e-06	0.000241972	Mpped1	15	83779467	83858494	+	4295	protein_coding	metallophosphoesterase domain containing 1 [Source:MGI Symbol;Acc:MGI:106316]	-	-
ENSMUSG00000054087	7.12213	24.0867	16.9577	59.4886	55.0642	101.332	133.799	202.032	139.589	120.577	32.5439	139.466	-2.0955	1.66252e-06	0.000245045	Fbxw28	9	109322886	109339659	-	1951	protein_coding	F-box and WD-40 domain protein 28 [Source:MGI Symbol;Acc:MGI:3779847]	-	-
ENSMUSG00000056586	15.4313	10.5981	3.99006	16.9967	25.117	35.7643	81.8195	52.9599	55.0494	93.4912	14.4266	63.8169	-2.14721	1.66661e-06	0.000245045	Zar1l	5	150507055	150518164	-	895	protein_coding	zygote arrest 1-like [Source:MGI Symbol;Acc:MGI:3690051]	-	-
ENSMUSG00000062794	18.9924	18.3059	17.9553	22.3082	10.6264	63.581	51.0169	81.4013	44.2361	42.8137	17.6376	56.6098	-1.68537	1.77986e-06	0.00026004	Zfp599	9	22247430	22259895	-	3574	protein_coding	zinc finger protein 599 [Source:MGI Symbol;Acc:MGI:2679006]	C2H2	C2H2
ENSMUSG00000035615	0	2.8904	0	5.31148	12.5585	113.254	31.7652	58.8443	34.4059	17.475	4.15208	51.1488	-3.60312	1.86169e-06	0.000270285	Frmpd1	4	45184875	45285936	+	5324	protein_coding	FERM and PDZ domain containing 1 [Source:MGI Symbol;Acc:MGI:2446274]	-	-
ENSMUSG00000087512	0	0	1.99503	0	4.83019	13.9084	28.8775	27.4607	15.7284	23.5912	1.36504	21.9132	-3.95582	2.10145e-06	0.000303186	Gm11985	11	7183153	7188569	-	1007	protein_coding	predicted gene 11985 [Source:MGI Symbol;Acc:MGI:3650614]	-	-
ENSMUSG00000078925	0	2.8904	4.98757	7.43607	0	25.8298	30.8026	24.5185	20.6435	35.8237	3.06281	27.5236	-3.16167	2.21647e-06	0.000317796	D030018L15Rik	15	96051603	96079553	-	4408	lincRNA	RIKEN cDNA D030018L15 gene [Source:MGI Symbol;Acc:MGI:3028082]	-	-
ENSMUSG00000046694	92.5877	26.9771	63.8409	48.8656	45.4038	260.285	98.1834	206.936	142.539	145.916	55.535	170.772	-1.62514	2.48036e-06	0.000353436	Tent5b	4	133480132	133487938	+	2287	protein_coding	terminal nucleotidyltransferase 5B [Source:MGI Symbol;Acc:MGI:2140500]	-	-
ENSMUSG00000073568	0	0	0	0	0	3.97382	7.70066	18.634	10.8133	13.98	0	11.0204	-5.86021	2.52743e-06	0.000355786	Arl14epl	18	46925982	46934222	+	2169	protein_coding	ADP-ribosylation factor-like 14 effector protein-like [Source:MGI Symbol;Acc:MGI:2685795]	-	-
ENSMUSG00000004099	1699.82	1580.09	1185.05	1451.1	1454.85	2587.95	2356.4	1986.98	2257.02	2331.16	1474.18	2303.9	-0.644391	2.52768e-06	0.000355786	Dnmt1	9	20907209	20959888	-	7377	protein_coding	DNA methyltransferase (cytosine-5) 1 [Source:MGI Symbol;Acc:MGI:94912]	-	-
ENSMUSG00000094337	7.12213	0	10.9727	18.059	14.4906	90.4043	83.7447	52.9599	53.0833	29.7075	10.1289	61.9799	-2.61372	2.56168e-06	0.000358386	Gm3286	GL456354.1	82993	86051	-	1446	protein_coding	PRAME family member 8 [Source:NCBI gene;Acc:665290]	-	-
ENSMUSG00000054986	0	6.74428	0	1.0623	0	2053.47	351.343	267.742	3.9321	8.7375	1.56131	537.045	-8.41343	2.61649e-06	0.00036385	Sec14l3	11	4064841	4077736	+	2784	protein_coding	SEC14-like lipid binding 3 [Source:MGI Symbol;Acc:MGI:3617848]	-	-
ENSMUSG00000041857	118.702	19.2694	79.8011	74.3607	69.5548	160.94	209.843	370.719	212.333	231.544	72.3377	237.076	-1.71612	2.69008e-06	0.000371844	Oosp1	19	11667460	11691150	-	972	protein_coding	oocyte secreted protein 1 [Source:MGI Symbol;Acc:MGI:2149290]	-	-
ENSMUSG00000030909	0	0.963468	3.99006	2.12459	3.86416	18.8756	17.3265	17.6533	27.5247	19.2225	2.18845	20.1205	-3.16951	3.17529e-06	0.0004363	Anks4b	7	120173858	120185586	+	3900	protein_coding	ankyrin repeat and sterile alpha motif domain containing 4B [Source:MGI Symbol;Acc:MGI:1919324]	-	-
ENSMUSG00000023192	3.56107	2.8904	1.99503	6.37378	13.5245	25.8298	32.7278	26.4799	34.4059	46.3087	5.66896	33.1504	-2.53913	3.24499e-06	0.000443239	Grm2	9	106643095	106656082	-	4894	protein_coding	glutamate receptor, metabotropic 2 [Source:MGI Symbol;Acc:MGI:1351339]	-	-
ENSMUSG00000108379	0	13.4886	8.97763	7.43607	6.76227	49.6727	41.391	22.557	54.0663	36.6975	7.33291	40.8769	-2.45805	3.30748e-06	0.000449117	A730082K24Rik	7	114948650	114983960	+	2400	lincRNA	RIKEN cDNA A730082K24 gene [Source:MGI Symbol;Acc:MGI:2142163]	-	-
ENSMUSG00000022441	0	0.963468	11.9702	8.49837	5.79623	231.475	52.942	33.3451	21.6265	15.7275	5.44565	71.0232	-3.69689	3.56457e-06	0.000479592	Efcab6	15	83866712	84065379	-	6408	protein_coding	EF-hand calcium binding domain 6 [Source:MGI Symbol;Acc:MGI:1924877]	-	-
novel.1037	142.443	38.5387	3.99006	11.6853	5.79623	0.993454	4.81291	0	0.983025	0.87375	40.4906	1.53263	4.72048	3.57346e-06	0.000479592	-	9	86735074	86743298	+	411	-	- && - && -	-	-
ENSMUSG00000026807	2.37404	6.74428	1.99503	8.49837	4.83019	160.94	44.2788	51.9791	2.94907	22.7175	4.88838	56.5728	-3.52751	3.69622e-06	0.000493199	Ak8	2	28700164	28813165	+	1873	protein_coding	adenylate kinase 8 [Source:MGI Symbol;Acc:MGI:1916120]	-	-
ENSMUSG00000043969	173.305	201.365	172.57	254.951	276.287	442.087	427.387	529.599	378.464	312.802	215.696	418.068	-0.953556	3.84637e-06	0.000510286	Emx2	19	59458372	59465357	+	3002	protein_coding	empty spiracles homeobox 2 [Source:MGI Symbol;Acc:MGI:95388]	HB-other	HB->HB-other
ENSMUSG00000036231	0	2.8904	7.98011	8.49837	3.86416	182.795	45.2414	58.8443	6.88117	12.2325	4.64661	61.199	-3.71064	4.00373e-06	0.000528127	Agr3	12	35925620	35949736	+	972	protein_coding	anterior gradient 3 [Source:MGI Symbol;Acc:MGI:2685734]	-	-
ENSMUSG00000005503	0	0	0	4.24919	7.72831	41.7251	22.1394	27.4607	21.6265	31.455	2.3955	28.8813	-3.57028	4.20482e-06	0.0005515	Evx1	6	52313498	52318378	+	2877	protein_coding	even-skipped homeobox 1 [Source:MGI Symbol;Acc:MGI:95461]	HB-other	HB->HB-other
ENSMUSG00000079741	5.93511	11.5616	30.9229	46.741	27.0491	114.247	84.7072	90.2279	66.8457	122.325	24.442	95.6706	-1.9658	4.74306e-06	0.000618581	Nlrp4g	9	124348872	124356970	+	2064	transcribed_unprocessed_pseudogene	NLR family, pyrin domain containing 4G [Source:MGI Symbol;Acc:MGI:3700744]	-	-
ENSMUSG00000058159	0	0.963468	1.99503	0	1.93208	46.6923	22.1394	20.5955	7.8642	6.99	0.978115	20.8563	-4.36397	4.94366e-06	0.000638717	T2	17	8372396	8422728	+	1770	protein_coding	brachyury 2 [Source:MGI Symbol;Acc:MGI:104658]	-	-
ENSMUSG00000047352	3.56107	3.85387	15.9602	21.2459	16.4227	32.784	54.8672	69.6324	76.6759	48.93	12.2088	56.5779	-2.20691	4.9528e-06	0.000638717	Olfr976	9	39954139	39961133	-	3383	protein_coding	olfactory receptor 976 [Source:MGI Symbol;Acc:MGI:3030810]	-	-
ENSMUSG00000026301	2.37404	0.963468	10.9727	14.8721	11.5925	462.949	91.4453	126.515	40.304	24.465	8.15496	149.136	-4.19051	4.99725e-06	0.00064087	Iqca	1	90042132	90153401	-	4278	protein_coding	IQ motif containing with AAA domain [Source:MGI Symbol;Acc:MGI:1922168]	-	-
ENSMUSG00000092284	3.56107	3.85387	25.9354	13.8099	28.9812	66.5614	58.7175	69.6324	80.608	79.5112	15.2283	71.0061	-2.21221	5.08833e-06	0.000648944	Gm8801	17	35947246	35952297	+	1064	unprocessed_pseudogene	predicted gene 8801 [Source:MGI Symbol;Acc:MGI:3779813]	C3H	C3H
ENSMUSG00000035191	89.0267	54.9177	77.8061	94.5444	112.061	151.998	182.891	269.703	152.369	192.225	85.6711	189.837	-1.14866	5.26115e-06	0.000667299	Rfpl4	7	5109787	5116950	-	1716	protein_coding	ret finger protein-like 4 [Source:MGI Symbol;Acc:MGI:2149590]	-	-
ENSMUSG00000037627	40.3588	29.8675	29.9254	8.49837	33.8114	481.825	143.425	92.1894	61.9305	47.1825	28.4923	165.31	-2.53669	5.43247e-06	0.000685264	Rgs22	15	36009479	36140400	-	5664	protein_coding	regulator of G-protein signalling 22 [Source:MGI Symbol;Acc:MGI:3613651]	-	-
ENSMUSG00000072109	3.56107	6.74428	12.9677	16.9967	13.5245	25.8298	51.9794	39.2295	50.1343	52.425	10.7589	43.9196	-2.02259	5.55618e-06	0.000697059	A530040E14Rik	1	85105946	85114035	+	2323	antisense	RIKEN cDNA A530040E14 gene [Source:MGI Symbol;Acc:MGI:3612703]	-	-
ENSMUSG00000024154	0	4.81734	0	5.31148	2.89812	15.8953	32.7278	50.9984	23.5926	13.1062	2.60539	27.2641	-3.36744	5.61208e-06	0.000700267	Gtf2a1l	17	88668660	88715152	+	1621	protein_coding	general transcription factor IIA, 1-like [Source:MGI Symbol;Acc:MGI:1919078]	-	-
ENSMUSG00000070677	0	2.8904	3.99006	2.12459	2.89812	14.9018	21.1768	25.4992	24.5756	13.1062	2.38063	19.8519	-3.0261	5.70103e-06	0.000707541	D5Ertd577e	5	95456806	95485587	+	2565	protein_coding	DNA segment, Chr 5, ERATO Doi 577, expressed [Source:MGI Symbol;Acc:MGI:1261918]	-	-
ENSMUSG00000027886	0	0	0	0	0	53.6465	12.5136	28.4414	0	2.62125	0	19.4445	-6.6774	5.7333e-06	0.000707741	1700013F07Rik	3	108534150	108544723	+	1452	protein_coding	RIKEN cDNA 1700013F07 gene [Source:MGI Symbol;Acc:MGI:1922754]	-	-
ENSMUSG00000024526	0	0	3.99006	2.12459	0	122.195	23.102	45.114	3.9321	2.62125	1.22293	39.3928	-5.00063	6.10236e-06	0.000749292	Cidea	18	67343564	67367794	+	1164	protein_coding	cell death-inducing DNA fragmentation factor, alpha subunit-like effector A [Source:MGI Symbol;Acc:MGI:1270845]	-	-
ENSMUSG00000061809	0	1.92694	0	1.0623	0	12.9149	13.4762	47.0754	6.88117	16.6012	0.597846	19.3898	-4.98396	6.3151e-06	0.000771311	Tbpl2	2	24071721	24096595	-	1379	protein_coding	TATA box binding protein like 2 [Source:MGI Symbol;Acc:MGI:2684058]	-	-
ENSMUSG00000035910	10.6832	9.63468	5.98509	8.49837	7.72831	222.534	35.6155	33.3451	14.7454	27.0862	8.50593	66.6652	-2.97216	6.51212e-06	0.000791188	Dcdc2a	13	25056004	25210706	+	8284	protein_coding	doublecortin domain containing 2a [Source:MGI Symbol;Acc:MGI:2652818]	-	-
ENSMUSG00000067702	0	0	3.99006	13.8099	9.66039	48.6792	46.204	40.2103	34.4059	41.94	5.49206	42.2879	-2.93832	7.12886e-06	0.000860374	Tuba3a	6	125278274	125286042	-	1509	protein_coding	tubulin, alpha 3A [Source:MGI Symbol;Acc:MGI:1095406]	-	-
ENSMUSG00000029658	1.18702	3.85387	3.99006	0	0.966039	79.4763	25.9897	44.1332	15.7284	1.7475	1.9994	33.415	-4.04342	7.15611e-06	0.000860374	Wdr95	5	149528679	149611894	+	3477	protein_coding	WD40 repeat domain 95 [Source:MGI Symbol;Acc:MGI:1923042]	-	-
ENSMUSG00000000094	42.7328	41.4291	35.9105	30.8066	40.5736	73.5156	82.7821	74.5361	80.608	102.229	38.2905	82.7341	-1.11325	7.32654e-06	0.0008763	Tbx4	11	85886422	85916097	+	3401	protein_coding	T-box 4 [Source:MGI Symbol;Acc:MGI:102556]	-	-
ENSMUSG00000099762	0	0	0.997514	1.0623	0	101.332	9.62582	23.5377	3.9321	0.87375	0.411962	27.8603	-6.04191	7.41159e-06	0.000881903	Gm21149	5	15471703	15476523	-	1212	protein_coding	predicted gene, 21149 [Source:MGI Symbol;Acc:MGI:5434504]	-	-
ENSMUSG00000019892	0	2.8904	2.99254	0	4.83019	177.828	30.8026	13.7303	13.7623	2.62125	2.14263	47.749	-4.44932	7.68046e-06	0.000909209	Lrriq1	10	103046031	103236322	-	6449	protein_coding	leucine-rich repeats and IQ motif containing 1 [Source:MGI Symbol;Acc:MGI:1922228]	-	-
ENSMUSG00000117055	8.30916	3.85387	8.97763	3.18689	7.72831	19.8691	25.9897	36.2873	25.5586	38.445	6.41117	29.2299	-2.19395	8.17704e-06	0.000963055	AC098880.1	17	22687720	22690460	+	1733	processed_pseudogene	C2H2 zinc finger protein pseudogene	C2H2	C2H2
ENSMUSG00000039209	0	0	0	0	0	13.9084	10.5884	9.80738	2.94907	10.485	0	9.54764	-5.6526	8.7864e-06	0.00102957	Rpl39l	16	10170226	10174911	+	831	protein_coding	ribosomal protein L39-like [Source:MGI Symbol;Acc:MGI:1915422]	-	-
ENSMUSG00000079007	1.18702	1.92694	3.99006	2.12459	9.66039	24.8363	25.9897	25.4992	18.6775	26.2125	3.7778	24.243	-2.65714	9.64401e-06	0.00112436	Tcl1b4	12	105201957	105206993	+	1496	protein_coding	T cell leukemia/lymphoma 1B, 4 [Source:MGI Symbol;Acc:MGI:1351604]	-	-
ENSMUSG00000038871	250.462	376.716	283.294	391.987	393.178	475.864	678.621	586.481	560.324	682.398	339.127	596.738	-0.814536	9.70944e-06	0.00112629	Bpgm	6	34476207	34505613	+	3588	protein_coding	2,3-bisphosphoglycerate mutase [Source:MGI Symbol;Acc:MGI:1098242]	-	-
ENSMUSG00000026645	4.74809	0	0	2.12459	0.966039	11.9214	21.1768	9.80738	21.6265	34.0762	1.56774	19.7217	-3.72758	1.11485e-05	0.00128676	Olah	2	3341982	3397210	-	1769	protein_coding	oleoyl-ACP hydrolase [Source:MGI Symbol;Acc:MGI:2139018]	-	-
ENSMUSG00000024406	4.74809	2.8904	13.9652	19.1213	12.5585	25.8298	53.9046	77.4783	43.2531	43.6875	10.6567	48.8307	-2.19353	1.16622e-05	0.00133936	Pou5f1	17	35506018	35510772	+	2248	protein_coding	POU domain, class 5, transcription factor 1 [Source:MGI Symbol;Acc:MGI:101893]	HB-other	HB->HB-other
ENSMUSG00000050875	54.603	78.0409	43.8906	76.4853	85.9775	188.756	124.173	217.724	114.031	138.052	67.7995	156.547	-1.205	1.18374e-05	0.00135139	A730017C20Rik	18	59062248	59076962	+	5347	protein_coding	RIKEN cDNA A730017C20 gene [Source:MGI Symbol;Acc:MGI:2442934]	-	-
novel.1124	1196.52	1132.07	605.491	459.974	275.321	229.488	232.945	294.221	309.653	286.59	733.876	270.579	1.43915	1.18841e-05	0.00135139	-	X	150484852	150490540	-	5689	-	- && sp|P03359|POL_WMSV Gag-Pol polyprotein OS=Woolly monkey sarcoma virus OX=11970 GN=pol PE=3 SV=2 && -	-	-
ENSMUSG00000096883	5.93511	28.904	24.9379	16.9967	12.5585	303.997	42.3536	127.496	32.4398	41.0662	17.8665	109.47	-2.60959	1.20665e-05	0.00136541	Shisa8	15	82206168	82212815	-	2776	protein_coding	shisa family member 8 [Source:MGI Symbol;Acc:MGI:2146080]	-	-
ENSMUSG00000039329	0	0	5.98509	2.12459	7.72831	23.8429	22.1394	37.2681	20.6435	29.7075	3.1676	26.7203	-3.05066	1.21283e-05	0.00136571	Tex19.1	11	121146143	121148319	+	1872	protein_coding	testis expressed gene 19.1 [Source:MGI Symbol;Acc:MGI:1920929]	-	-
ENSMUSG00000040452	0	0.963468	2.99254	5.31148	4.83019	36.7578	12.5136	27.4607	18.6775	18.3487	2.81954	22.7516	-2.99435	1.23196e-05	0.00136855	Cdh12	15	20449265	21589533	+	6305	protein_coding	cadherin 12 [Source:MGI Symbol;Acc:MGI:109503]	-	-
ENSMUSG00000044681	0	0	0	1.0623	0	11.9214	18.2891	24.5185	5.89815	2.62125	0.212459	12.6497	-5.47929	1.23248e-05	0.00136855	Cnpy1	5	28200819	28245806	-	5864	protein_coding	canopy FGF signaling regulator 1 [Source:MGI Symbol;Acc:MGI:2442451]	-	-
ENSMUSG00000020562	0	0.963468	0.997514	1.0623	0	95.3716	18.2891	51.9791	1.96605	0	0.604656	33.5212	-5.77318	1.23314e-05	0.00136855	Efcab10	12	33394854	33401267	+	673	protein_coding	EF-hand calcium binding domain 10 [Source:MGI Symbol;Acc:MGI:1922290]	-	-
ENSMUSG00000029370	5.93511	27.9406	5.98509	23.3705	25.117	52.6531	58.7175	73.5554	73.7268	66.405	17.6697	65.0115	-1.87041	1.24345e-05	0.00137339	Rassf6	5	90603076	90640657	-	4260	protein_coding	Ras association (RalGDS/AF-6) domain family member 6 [Source:MGI Symbol;Acc:MGI:1920496]	-	-
ENSMUSG00000030851	0	0	0	0	0.966039	9.93454	17.3265	26.4799	2.94907	6.11625	0.193208	12.5613	-5.46994	1.26629e-05	0.00139195	Ldhc	7	46861203	46878142	+	1580	protein_coding	lactate dehydrogenase C [Source:MGI Symbol;Acc:MGI:96764]	-	-
ENSMUSG00000030491	7.12213	12.5251	13.9652	13.8099	21.2529	68.5483	26.9523	59.825	38.338	47.1825	13.735	48.1692	-1.80056	1.28543e-05	0.00140049	Tdrd12	7	35469098	35537745	-	4338	protein_coding	tudor domain containing 12 [Source:MGI Symbol;Acc:MGI:1919231]	-	-
ENSMUSG00000037313	436.824	398.876	374.068	522.65	493.646	593.092	693.059	677.69	807.063	837.052	445.213	721.591	-0.697095	1.28619e-05	0.00140049	Tacc3	5	33658128	33678995	+	3552	protein_coding	transforming, acidic coiled-coil containing protein 3 [Source:MGI Symbol;Acc:MGI:1341163]	-	-
ENSMUSG00000025420	14.2443	16.379	19.9503	11.6853	20.2868	137.097	51.9794	50.9984	35.3889	39.3187	16.5091	62.9564	-1.92639	1.34459e-05	0.00145721	Katnal2	18	76977148	77047308	-	4061	protein_coding	katanin p60 subunit A-like 2 [Source:MGI Symbol;Acc:MGI:1924234]	-	-
ENSMUSG00000033579	0	2.8904	1.99503	4.24919	17.3887	41.7251	33.6904	49.0369	33.4228	30.5812	5.30466	37.6913	-2.80542	1.4161e-05	0.0015253	Fa2h	8	111345135	111393824	-	3008	protein_coding	fatty acid 2-hydroxylase [Source:MGI Symbol;Acc:MGI:2443327]	-	-
ENSMUSG00000071262	20.1794	10.5981	10.9727	29.7443	20.2868	58.6138	47.1665	57.8636	42.2701	76.0162	18.3563	56.386	-1.62613	1.42064e-05	0.0015253	Zfp957	14	79212355	79247369	-	3216	protein_coding	zinc finger protein 957 [Source:MGI Symbol;Acc:MGI:2145729]	-	-
ENSMUSG00000020890	3.56107	7.70774	1.99503	15.9344	15.4566	70.5352	39.4659	29.4221	30.4738	51.5512	8.93098	44.2896	-2.3038	1.52798e-05	0.00163295	Gucy2e	11	69218117	69237036	-	9197	protein_coding	guanylate cyclase 2e [Source:MGI Symbol;Acc:MGI:105123]	-	-
ENSMUSG00000048029	7.12213	10.5981	8.97763	10.623	8.69435	300.023	57.7549	74.5361	7.8642	6.11625	9.20304	89.2589	-3.27563	1.55816e-05	0.00165754	Eno4	19	58943425	58971421	+	2570	protein_coding	enolase 4 [Source:MGI Symbol;Acc:MGI:2441717]	-	-
ENSMUSG00000000903	55.79	35.6483	72.8185	48.8656	63.7586	358.637	136.687	271.664	64.8796	106.597	55.3762	187.693	-1.76058	1.57849e-05	0.00166932	Vpreb3	10	75943057	75949657	+	859	protein_coding	pre-B lymphocyte gene 3 [Source:MGI Symbol;Acc:MGI:98938]	-	-
novel.313	12804.4	14801.8	7692.83	5849	4158.8	4618.57	2276.51	4257.38	3055.24	3857.6	9061.36	3613.06	1.32649	1.58868e-05	0.00166932	-	14	32115304	32120539	-	5236	-	- && sp|P03330|GAG_WMSV Gag polyprotein OS=Woolly monkey sarcoma virus OX=11970 GN=gag PE=3 SV=4 && PF01140:Matrix protein (MA), p15	-	-
novel.796	1.18702	3.85387	2.99254	2.12459	14.4906	19.8691	33.6904	29.4221	27.5247	48.0562	4.92972	31.7125	-2.66285	1.59093e-05	0.00166932	-	5	89619852	89622719	+	2868	-	- && - && -	-	-
ENSMUSG00000001228	395.278	500.04	404.991	653.312	409.601	790.789	808.569	672.786	824.758	998.696	472.644	819.12	-0.79347	1.62416e-05	0.00169647	Uhrf1	17	56303321	56323486	+	4259	protein_coding	ubiquitin-like, containing PHD and RING finger domains, 1 [Source:MGI Symbol;Acc:MGI:1338889]	PHD	PHD
ENSMUSG00000101581	15.4313	23.1232	9.97514	11.6853	13.5245	40.7316	41.391	61.7865	43.2531	37.5712	14.7479	44.9467	-1.6046	1.63397e-05	0.00169903	C430002N11Rik	9	96765562	96782477	+	2111	processed_transcript	RIKEN cDNA C430002N11 gene [Source:MGI Symbol;Acc:MGI:2442576]	-	-
ENSMUSG00000066359	1.18702	8.67121	14.9627	19.1213	14.4906	72.5221	66.4182	32.3644	34.4059	49.8037	11.6866	51.1028	-2.11929	1.65123e-05	0.00170378	Tcl1b1	12	105159690	105166625	+	1040	protein_coding	T cell leukemia/lymphoma 1B, 1 [Source:MGI Symbol;Acc:MGI:1351601]	-	-
ENSMUSG00000025213	123.45	184.022	145.637	180.59	174.853	194.717	294.55	316.778	369.617	400.177	161.711	315.168	-0.961937	1.6533e-05	0.00170378	Kazald1	19	45075241	45079289	+	1681	protein_coding	Kazal-type serine peptidase inhibitor domain 1 [Source:MGI Symbol;Acc:MGI:2147606]	-	-
ENSMUSG00000063239	0	10.5981	5.98509	15.9344	7.72831	271.213	29.8401	66.6902	14.7454	20.97	8.0492	80.6917	-3.31878	1.74859e-05	0.00179397	Grm4	17	27422387	27521403	-	5977	protein_coding	glutamate receptor, metabotropic 4 [Source:MGI Symbol;Acc:MGI:1351341]	-	-
ENSMUSG00000045662	8.30916	3.85387	16.9577	1.0623	4.83019	57.6203	36.5781	45.114	20.6435	32.3287	7.00265	38.4569	-2.45719	1.76927e-05	0.00180716	Henmt1	3	108939873	108960774	+	2675	protein_coding	HEN1 methyltransferase homolog 1 (Arabidopsis) [Source:MGI Symbol;Acc:MGI:1913965]	-	-
ENSMUSG00000056215	28.4885	18.3059	27.9304	18.059	24.151	310.951	47.1665	112.785	47.1852	40.1925	23.387	111.656	-2.2556	1.78941e-05	0.00181968	Lrguk	6	34029448	34134034	+	12068	protein_coding	leucine-rich repeats and guanylate kinase domain containing [Source:MGI Symbol;Acc:MGI:1921604]	-	-
ENSMUSG00000022613	14.2443	10.5981	7.98011	24.4328	22.2189	14.9018	88.5576	88.2664	64.8796	79.5112	15.8948	67.2233	-2.08184	1.82654e-05	0.00184686	Miox	15	89334398	89337015	+	1651	protein_coding	myo-inositol oxygenase [Source:MGI Symbol;Acc:MGI:1891725]	-	-
ENSMUSG00000020878	1.18702	7.70774	11.9702	8.49837	1.93208	181.802	35.6155	67.6709	10.8133	10.485	6.25908	61.2774	-3.28383	1.83214e-05	0.00184686	Lrrc46	11	97034602	97041407	-	1336	protein_coding	leucine rich repeat containing 46 [Source:MGI Symbol;Acc:MGI:1916547]	-	-
ENSMUSG00000036962	0	0.963468	1.99503	0	0	115.241	8.66324	15.6918	0.983025	6.11625	0.591699	29.339	-5.59308	1.88888e-05	0.00189578	Cfap221	1	119923341	119997234	-	2915	protein_coding	cilia and flagella associated protein 221 [Source:MGI Symbol;Acc:MGI:2684947]	-	-
ENSMUSG00000100916	0	0	2.99254	1.0623	2.89812	51.6596	24.0646	31.3836	2.94907	8.7375	1.39059	23.7589	-4.066	1.94257e-05	0.00194122	Lhb	7	45420820	45421897	+	678	protein_coding	luteinizing hormone beta [Source:MGI Symbol;Acc:MGI:96782]	-	-
ENSMUSG00000069867	9.49618	3.85387	12.9677	12.7476	24.151	59.6072	53.9046	38.2488	28.5077	69.0262	12.6433	49.8589	-1.97658	1.96643e-05	0.0019566	Pabpn1l	8	122619471	122622739	-	1193	protein_coding	poly(A)binding protein nuclear 1-like [Source:MGI Symbol;Acc:MGI:2685954]	-	-
ENSMUSG00000052616	3.56107	0	3.99006	6.37378	5.79623	22.8494	23.102	30.4029	43.2531	11.3587	3.94423	26.1932	-2.73471	2.03747e-05	0.00201858	Terb1	8	104446719	104509910	-	3749	protein_coding	telomere repeat binding bouquet formation protein 1 [Source:MGI Symbol;Acc:MGI:2443187]	-	-
ENSMUSG00000054320	3.56107	12.5251	11.9702	14.8721	15.4566	187.763	73.1563	57.8636	14.7454	23.5912	11.677	71.4238	-2.60559	2.05908e-05	0.00203128	Lrrc36	8	105413571	105464086	+	2549	protein_coding	leucine rich repeat containing 36 [Source:MGI Symbol;Acc:MGI:2448585]	-	-
ENSMUSG00000030031	100.897	205.219	177.558	195.463	138.144	312.938	290.7	336.393	285.077	286.59	163.456	302.34	-0.885082	2.12078e-05	0.00208323	Kbtbd8	6	95117240	95129790	+	5093	protein_coding	kelch repeat and BTB (POZ) domain containing 8 [Source:MGI Symbol;Acc:MGI:2661430]	-	-
ENSMUSG00000045693	0	2.8904	10.9727	10.623	17.3887	49.6727	52.942	37.2681	34.4059	43.6875	8.37494	43.5952	-2.36578	2.15631e-05	0.00210917	Nlrp4e	7	23301192	23362277	+	3400	protein_coding	NLR family, pyrin domain containing 4E [Source:MGI Symbol;Acc:MGI:3056600]	-	-
ENSMUSG00000056486	106.832	84.7852	138.654	110.479	116.891	212.599	201.18	182.417	191.69	179.119	111.528	193.401	-0.793774	2.17136e-05	0.00211492	Chn1	2	73610660	73775346	-	6365	protein_coding	chimerin 1 [Source:MGI Symbol;Acc:MGI:1915674]	-	-
ENSMUSG00000031960	3559.88	3174.63	3463.37	2974.43	3302.89	2454.82	2310.2	2455.77	2492.95	2533.87	3295.04	2449.52	0.427697	2.18052e-05	0.00211492	Aars	8	111033144	111057664	+	9282	protein_coding	alanyl-tRNA synthetase [Source:MGI Symbol;Acc:MGI:2384560]	-	-
ENSMUSG00000041220	4427.59	3009.87	4289.31	4577.43	4743.25	2737.96	2651.91	2037.97	2407.43	3086.96	4209.49	2584.45	0.703677	2.19261e-05	0.00211775	Elovl6	3	129532355	129638495	+	6431	protein_coding	ELOVL family member 6, elongation of long chain fatty acids (yeast) [Source:MGI Symbol;Acc:MGI:2156528]	-	-
ENSMUSG00000038011	4.74809	7.70774	7.98011	2.12459	16.4227	436.126	87.595	70.6132	7.8642	36.6975	7.79664	127.779	-4.02943	2.22001e-05	0.00213528	Dnah10	5	124725085	124834308	+	16086	protein_coding	dynein, axonemal, heavy chain 10 [Source:MGI Symbol;Acc:MGI:1860299]	-	-
ENSMUSG00000025777	17.8053	9.63468	10.9727	8.49837	10.6264	63.581	42.3536	23.5377	28.5077	44.5612	11.5075	40.5083	-1.82479	2.36662e-05	0.00226685	Gdap1	1	17145362	17164271	+	7731	protein_coding	ganglioside-induced differentiation-associated-protein 1 [Source:MGI Symbol;Acc:MGI:1338002]	-	-
ENSMUSG00000041673	17.8053	7.70774	22.9428	8.49837	9.66039	217.566	51.9794	78.4591	17.6944	27.0862	13.3229	78.5571	-2.56181	2.46372e-05	0.00235011	Lrrc18	14	32991382	33015291	+	3135	protein_coding	leucine rich repeat containing 18 [Source:MGI Symbol;Acc:MGI:1914830]	-	-
ENSMUSG00000029032	9.49618	22.1598	47.8807	49.9279	33.8114	201.671	83.7447	167.706	61.9305	78.6375	32.6552	118.738	-1.8587	2.58708e-05	0.00244951	Arhgef16	4	154278486	154301676	-	5481	protein_coding	Rho guanine nucleotide exchange factor (GEF) 16 [Source:MGI Symbol;Acc:MGI:2446219]	-	-
ENSMUSG00000039092	0	0	1.99503	1.0623	0.966039	124.182	23.102	21.5762	1.96605	0	0.804673	34.1652	-5.38947	2.58916e-05	0.00244951	Sptlc3	2	139493913	139637674	+	2845	protein_coding	serine palmitoyltransferase, long chain base subunit 3 [Source:MGI Symbol;Acc:MGI:2444678]	-	-
ENSMUSG00000015365	0	0	0	1.0623	0	5.96072	11.551	23.5377	5.89815	6.11625	0.212459	10.6128	-5.22673	2.67247e-05	0.00251801	Mov10l1	15	88982909	89055152	+	4183	protein_coding	Moloney leukemia virus 10-like 1 [Source:MGI Symbol;Acc:MGI:1891384]	-	-
ENSMUSG00000054889	809.549	716.82	699.257	1067.61	1139.93	4844.08	1739.39	1695.7	1188.48	1744	886.632	2242.33	-1.33853	2.79673e-05	0.00262438	Dsp	13	38151294	38198577	+	9659	protein_coding	desmoplakin [Source:MGI Symbol;Acc:MGI:109611]	-	-
ENSMUSG00000006784	16.6183	26.9771	33.9155	21.2459	14.4906	266.246	64.493	94.1509	49.1512	31.455	22.6495	101.099	-2.15544	2.94055e-05	0.00274817	Ttc25	11	100545607	100572568	+	6147	protein_coding	tetratricopeptide repeat domain 25 [Source:MGI Symbol;Acc:MGI:1921657]	-	-
novel.900	0	0	0	4.24919	8.69435	8.94108	52.942	28.4414	21.6265	48.0562	2.58871	32.0015	-3.6104	3.06443e-05	0.00284999	-	6	135000773	135005935	-	2532	-	- && - && -	-	-
ENSMUSG00000051606	1.18702	5.78081	11.9702	16.9967	11.5925	150.012	25.9897	80.4205	20.6435	27.96	9.50544	61.0051	-2.67537	3.0742e-05	0.00284999	2010001K21Rik	13	46979908	47011195	+	3630	processed_transcript	RIKEN cDNA 2010001K21 gene [Source:MGI Symbol;Acc:MGI:1917079]	-	-
ENSMUSG00000056598	16.6183	26.0136	25.9354	12.7476	33.8114	812.645	135.724	185.36	43.2531	36.6975	23.0252	242.736	-3.39637	3.23647e-05	0.00298843	Drc3	11	60353329	60394341	+	4519	protein_coding	dynein regulatory complex subunit 3 [Source:MGI Symbol;Acc:MGI:1921915]	-	-
ENSMUSG00000027323	123.45	116.58	79.8011	130.662	99.502	187.763	182.891	169.668	235.926	202.71	109.999	195.791	-0.833766	3.37066e-05	0.00309993	Rad51	2	119112793	119147445	+	6649	protein_coding	RAD51 recombinase [Source:MGI Symbol;Acc:MGI:97890]	-	-
ENSMUSG00000044433	129.385	116.58	129.677	143.41	169.057	385.46	220.431	231.454	283.111	194.846	137.622	263.061	-0.933653	3.43416e-05	0.0031458	Camsap3	8	3587293	3609075	+	6119	protein_coding	calmodulin regulated spectrin-associated protein family, member 3 [Source:MGI Symbol;Acc:MGI:1916947]	-	-
ENSMUSG00000045010	0	0	1.99503	0	0	8.94108	4.81291	7.84591	32.4398	17.475	0.399006	14.3029	-5.08162	3.46791e-05	0.00316416	Gm4779	X	101790053	101794423	-	2364	protein_coding	predicted gene 4779 [Source:MGI Symbol;Acc:MGI:3646776]	-	-
ENSMUSG00000057068	3.56107	1.92694	12.9677	4.24919	0.966039	384.467	67.3808	106.9	6.88117	7.86375	4.73418	114.699	-4.59807	3.52264e-05	0.00320144	Fam47e	5	92555069	92591279	+	2110	protein_coding	family with sequence similarity 47, member E [Source:MGI Symbol;Acc:MGI:2686227]	-	-
ENSMUSG00000114388	2.37404	0.963468	0.997514	0	0.966039	6.95418	12.5136	14.7111	14.7454	18.3487	1.06021	13.4546	-3.6989	3.56392e-05	0.00321038	Gm48510	13	41176888	41179030	+	906	lincRNA	predicted gene, 48510 [Source:MGI Symbol;Acc:MGI:6098042]	-	-
ENSMUSG00000039396	75.9694	77.0774	63.8409	112.603	116.891	101.332	222.357	217.724	228.062	213.195	89.2764	196.534	-1.13817	3.57248e-05	0.00321038	Neil3	8	53586867	53639065	-	5555	protein_coding	nei like 3 (E. coli) [Source:MGI Symbol;Acc:MGI:2384588]	-	-
ENSMUSG00000031893	0	2.8904	0	5.31148	0	140.077	25.9897	18.634	1.96605	6.99	1.64038	38.7314	-4.55749	3.57419e-05	0.00321038	Tsnaxip1	8	105827731	105844680	+	2227	protein_coding	translin-associated factor X (Tsnax) interacting protein 1 [Source:MGI Symbol;Acc:MGI:1919486]	-	-
ENSMUSG00000073077	3.56107	9.63468	17.9553	13.8099	12.5585	196.704	63.5304	28.4414	42.2701	14.8537	11.5039	69.1599	-2.58122	3.58833e-05	0.00321058	Gm7173	X	79266559	79517285	-	9839	protein_coding	predicted gene 7173 [Source:MGI Symbol;Acc:MGI:3645063]	-	-
ENSMUSG00000059854	20.1794	10.5981	13.9652	2.12459	2.89812	1170.29	155.938	132.4	13.7623	8.7375	9.95309	296.225	-4.89803	3.63195e-05	0.00323707	Hydin	8	110266977	110610253	+	18037	protein_coding	HYDIN, axonemal central pair apparatus protein [Source:MGI Symbol;Acc:MGI:2389007]	-	-
ENSMUSG00000030269	434.45	373.826	431.924	544.958	549.676	588.125	777.767	827.743	751.031	795.986	466.967	748.13	-0.680074	3.6627e-05	0.00325191	Mtmr14	6	113237843	113281392	+	3006	protein_coding	myotubularin related protein 14 [Source:MGI Symbol;Acc:MGI:1916075]	-	-
ENSMUSG00000019027	37.9847	30.831	43.8906	30.8066	35.7434	388.44	102.034	132.4	55.0494	45.435	35.8513	144.672	-2.01216	3.72839e-05	0.00329388	Dnah1	14	31260375	31323896	-	13043	protein_coding	dynein, axonemal, heavy chain 1 [Source:MGI Symbol;Acc:MGI:107721]	-	-
ENSMUSG00000040473	110.393	85.7487	91.7713	69.0493	95.6379	454.008	170.377	236.358	171.046	121.451	90.52	230.648	-1.34934	3.7385e-05	0.00329388	Cfap69	5	5579278	5664239	-	7905	protein_coding	cilia and flagella associated protein 69 [Source:MGI Symbol;Acc:MGI:2443778]	-	-
ENSMUSG00000097925	9.49618	22.1598	50.8732	32.9312	32.8453	6.95418	10.5884	3.92295	3.9321	2.62125	29.6611	5.60378	2.41208	4.11946e-05	0.00359861	Gm26574	1	189833141	189836620	-	2141	antisense	predicted gene, 26574 [Source:MGI Symbol;Acc:MGI:5477068]	-	-
ENSMUSG00000054003	10.6832	1.92694	2.99254	8.49837	1.93208	31.7905	24.0646	29.4221	22.6096	20.97	5.20663	25.7714	-2.33966	4.12314e-05	0.00359861	Tdrd9	12	111971559	112068854	+	5415	protein_coding	tudor domain containing 9 [Source:MGI Symbol;Acc:MGI:1921941]	-	-
ENSMUSG00000001763	20.1794	24.0867	54.8633	25.4951	20.2868	373.539	51.9794	101.997	52.1003	74.2687	28.9823	130.777	-2.17192	4.13114e-05	0.00359861	Tspan33	6	29694222	29718559	+	5195	protein_coding	tetraspanin 33 [Source:MGI Symbol;Acc:MGI:1919012]	-	-
ENSMUSG00000050157	5.93511	19.2694	27.9304	2.12459	28.0151	214.586	54.8672	110.823	51.1173	32.3287	16.6549	92.7445	-2.46904	4.30085e-05	0.00372834	Gm867	10	75937723	75940672	-	1228	protein_coding	predicted gene 867 [Source:MGI Symbol;Acc:MGI:2685713]	-	-
ENSMUSG00000058145	30.8626	30.831	20.9478	39.305	26.0831	45.6989	74.1188	74.5361	70.7778	77.7637	29.6059	68.5791	-1.2154	4.31236e-05	0.00372834	Adamts17	7	66839735	67153171	+	7764	protein_coding	a disintegrin-like and metallopeptidase (reprolysin type) with thrombospondin type 1 motif, 17 [Source:MGI Symbol;Acc:MGI:3588195]	-	-
ENSMUSG00000022510	41.5458	29.8675	59.8509	71.1739	62.7925	89.4108	180.003	110.823	132.708	106.597	53.0461	123.909	-1.22345	4.36872e-05	0.00376296	Trp63	16	25683763	25892102	+	8391	protein_coding	transformation related protein 63 [Source:MGI Symbol;Acc:MGI:1330810]	-	-
ENSMUSG00000040957	617.252	427.78	551.625	848.775	1089.69	1047.1	1815.43	1534.86	1162.92	1631.29	707.025	1438.32	-1.02453	4.41238e-05	0.00378645	Cables1	18	11839220	11945630	+	3839	protein_coding	CDK5 and Abl enzyme substrate 1 [Source:MGI Symbol;Acc:MGI:1927065]	-	-
ENSMUSG00000071658	0	4.81734	4.98757	5.31148	3.86416	5.96072	25.9897	41.191	30.4738	24.465	3.79611	25.616	-2.73579	4.52881e-05	0.00387197	Gng3	19	8836929	8839246	-	1699	protein_coding	guanine nucleotide binding protein (G protein), gamma 3 [Source:MGI Symbol;Acc:MGI:102704]	-	-
ENSMUSG00000053117	54.603	119.47	74.8136	107.292	127.517	260.285	222.357	203.013	221.181	133.684	96.7391	208.104	-1.10145	4.75926e-05	0.00405398	E330013P04Rik	19	60144675	60162591	+	5106	lincRNA	RIKEN cDNA E330013P04 gene [Source:MGI Symbol;Acc:MGI:2147732]	-	-
ENSMUSG00000038963	3.56107	1.92694	0	5.31148	5.79623	28.8102	25.0271	32.3644	20.6435	7.86375	3.31914	22.9418	-2.79228	4.87309e-05	0.00413567	Slco4a1	2	180456245	180474867	+	4799	protein_coding	solute carrier organic anion transporter family, member 4a1 [Source:MGI Symbol;Acc:MGI:1351866]	-	-
ENSMUSG00000048230	9.49618	8.67121	2.99254	11.6853	22.2189	35.7643	32.7278	49.0369	35.3889	52.425	11.0128	41.0686	-1.89561	4.92285e-05	0.0041626	Fbxo43	15	36150060	36164884	-	4035	protein_coding	F-box protein 43 [Source:MGI Symbol;Acc:MGI:1926053]	-	-
ENSMUSG00000106173	0	0	0	0	0	1.98691	7.70066	7.84591	21.6265	5.2425	0	8.8805	-5.54684	4.96957e-05	0.00418677	Gm42764	5	30759032	30760477	+	741	sense_intronic	predicted gene 42764 [Source:MGI Symbol;Acc:MGI:5662901]	-	-
ENSMUSG00000003410	9.49618	5.78081	2.99254	2.12459	8.69435	50.6661	23.102	28.4414	16.7114	21.8437	5.81769	28.1529	-2.27989	5.10756e-05	0.00428737	Elavl3	9	22015005	22052023	-	6890	protein_coding	ELAV like RNA binding protein 3 [Source:MGI Symbol;Acc:MGI:109157]	-	-
ENSMUSG00000074397	0	2.8904	0	2.12459	2.89812	14.9018	18.2891	21.5762	24.5756	5.2425	1.58262	16.917	-3.38276	5.48426e-05	0.00458691	Foxr1	9	44433773	44441136	-	2291	protein_coding	forkhead box R1 [Source:MGI Symbol;Acc:MGI:2685961]	-	-
ENSMUSG00000029155	11.8702	7.70774	12.9677	4.24919	8.69435	573.223	63.5304	50.9984	14.7454	16.6012	9.09784	143.82	-3.9831	5.58796e-05	0.00465677	Spata18	5	73651379	73679512	+	2107	protein_coding	spermatogenesis associated 18 [Source:MGI Symbol;Acc:MGI:1920722]	-	-
ENSMUSG00000070324	0	0.963468	13.9652	26.5574	9.66039	30.7971	82.7821	92.1894	72.7438	48.93	10.2293	65.4885	-2.67598	5.6629e-05	0.00468655	Fbxw22	9	109378400	109404296	-	1835	protein_coding	F-box and WD-40 domain protein 22 [Source:MGI Symbol;Acc:MGI:3643290]	-	-
ENSMUSG00000030543	11.8702	5.78081	6.9826	18.059	20.2868	44.7054	25.9897	44.1332	47.1852	49.8037	12.5959	42.3635	-1.75174	5.66431e-05	0.00468655	Mesp2	7	79810727	79813439	+	1944	protein_coding	mesoderm posterior 2 [Source:MGI Symbol;Acc:MGI:1096325]	bHLH	bHLH
ENSMUSG00000032776	32.0496	14.452	42.8931	49.9279	32.8453	110.273	78.9318	98.0738	65.8626	79.5112	34.4336	86.5306	-1.3313	5.69514e-05	0.00469523	Mctp2	7	72077830	72306608	-	12351	protein_coding	multiple C2 domains, transmembrane 2 [Source:MGI Symbol;Acc:MGI:2685335]	-	-
ENSMUSG00000027702	4.74809	2.8904	15.9602	1.0623	3.86416	213.593	47.1665	51.9791	4.91512	5.2425	5.70503	64.5792	-3.49718	5.75335e-05	0.00472635	Lrrc34	3	30624267	30647869	-	1891	protein_coding	leucine rich repeat containing 34 [Source:MGI Symbol;Acc:MGI:1919077]	-	-
ENSMUSG00000037610	16.6183	4.81734	10.9727	10.623	19.3208	310.951	56.7924	61.7865	12.7793	13.1062	12.4704	91.0831	-2.86998	5.85351e-05	0.00479157	Kcnmb2	3	31902507	32200180	+	3128	protein_coding	potassium large conductance calcium-activated channel, subfamily M, beta member 2 [Source:MGI Symbol;Acc:MGI:1919663]	-	-
ENSMUSG00000111350	0	0	0.997514	0	0.966039	15.8953	10.5884	8.82664	9.83025	7.86375	0.392711	10.6009	-4.64774	5.96347e-05	0.00486433	Gm47182	9	124369217	124369493	+	277	unprocessed_pseudogene	predicted gene, 47182 [Source:MGI Symbol;Acc:MGI:6095970]	-	-
ENSMUSG00000032507	14.2443	19.2694	13.9652	13.8099	32.8453	111.267	52.942	73.5554	61.9305	23.5912	18.8268	64.6572	-1.77314	6.13569e-05	0.00498719	Fbxl2	9	113963637	114046191	-	4444	protein_coding	F-box and leucine-rich repeat protein 2 [Source:MGI Symbol;Acc:MGI:1919429]	-	-
ENSMUSG00000028019	314.561	446.086	529.68	505.653	550.642	998.421	871.137	979.757	567.205	745.308	469.324	832.366	-0.825823	6.1901e-05	0.00501376	Pdgfc	3	81036416	81214040	+	5089	protein_coding	platelet-derived growth factor, C polypeptide [Source:MGI Symbol;Acc:MGI:1859631]	-	-
ENSMUSG00000075225	13.0572	11.5616	21.9453	11.6853	4.83019	723.234	107.809	147.111	19.6605	9.61124	12.6159	201.485	-3.99763	6.2542e-05	0.00504797	Ccdc162	10	41538846	41716634	-	10197	protein_coding	coiled-coil domain containing 162 [Source:MGI Symbol;Acc:MGI:1923223]	-	-
novel.197	0	0	0	0	0.966039	10.928	7.70066	16.6725	11.7963	1.7475	0.193208	9.769	-5.10559	6.60468e-05	0.00531228	-	12	13834896	13847531	+	796	-	- && - && -	-	-
ENSMUSG00000001985	264.706	161.863	218.456	198.649	279.185	468.91	413.91	427.602	260.502	480.562	224.572	410.297	-0.870328	6.76845e-05	0.0054251	Grik3	4	125490700	125714173	+	8973	protein_coding	glutamate receptor, ionotropic, kainate 3 [Source:MGI Symbol;Acc:MGI:95816]	-	-
ENSMUSG00000029660	0	3.85387	1.99503	1.0623	11.5925	45.6989	20.2142	37.2681	23.5926	13.1062	3.70073	27.976	-2.88685	7.01121e-05	0.00560023	Tex26	5	149439660	149470979	+	2065	protein_coding	testis expressed 26 [Source:MGI Symbol;Acc:MGI:1923110]	-	-
ENSMUSG00000040978	5.93511	0.963468	4.98757	4.24919	7.72831	157.959	35.6155	25.4992	5.89815	6.11625	4.77273	46.2177	-3.27749	7.16901e-05	0.00570653	Gm11992	11	9048594	9069356	+	2400	protein_coding	predicted gene 11992 [Source:MGI Symbol;Acc:MGI:3651127]	-	-
ENSMUSG00000034486	2.37404	1.92694	3.99006	24.4328	14.4906	34.7709	46.204	50.0176	47.1852	55.0462	9.44289	46.6448	-2.30313	7.25644e-05	0.00575628	Gbx2	1	89927956	89931179	-	2177	protein_coding	gastrulation brain homeobox 2 [Source:MGI Symbol;Acc:MGI:95668]	HB-other	HB->HB-other
ENSMUSG00000096259	0	0	0	0	0	1.98691	3.85033	21.5762	12.7793	4.36875	0	8.91231	-5.5517	7.33901e-05	0.00577571	Gm3106	5	94218005	94222010	+	2383	protein_coding	predicted gene 3106 [Source:MGI Symbol;Acc:MGI:3781282]	-	-
ENSMUSG00000071324	16.6183	19.2694	34.913	21.2459	21.2529	199.684	48.1291	107.881	39.321	36.6975	22.6599	86.3426	-1.9269	7.33955e-05	0.00577571	Armc2	10	41914990	42018442	-	7188	protein_coding	armadillo repeat containing 2 [Source:MGI Symbol;Acc:MGI:1916449]	-	-
ENSMUSG00000045667	161.435	126.214	184.54	251.764	144.906	366.584	302.251	335.412	272.298	278.726	173.772	311.054	-0.840646	7.356e-05	0.00577571	Smtnl2	11	72389164	72411713	-	3815	protein_coding	smoothelin-like 2 [Source:MGI Symbol;Acc:MGI:2442764]	-	-
ENSMUSG00000040629	0	0	0	7.43607	4.83019	12.9149	25.9897	11.7689	44.2361	36.6975	2.45325	26.3214	-3.41925	7.41308e-05	0.0058008	Mael	1	166201201	166238747	-	1733	protein_coding	maelstrom spermatogenic transposon silencer [Source:MGI Symbol;Acc:MGI:2138453]	-	-
ENSMUSG00000010066	14.2443	19.2694	31.9205	19.1213	51.2001	74.509	78.9318	134.361	57.0154	61.1625	27.1511	81.196	-1.57335	7.56735e-05	0.00590151	Cacna2d2	9	107399612	107529343	+	7947	protein_coding	calcium channel, voltage-dependent, alpha 2/delta subunit 2 [Source:MGI Symbol;Acc:MGI:1929813]	-	-
ENSMUSG00000104614	0	7.70774	1.99503	11.6853	35.7434	59.6072	73.1563	61.7865	64.8796	75.1425	11.4263	66.9144	-2.53882	7.73392e-05	0.00601111	Fbxw27	9	109766045	109790670	-	1868	protein_coding	F-box and WD-40 domain protein 27 [Source:MGI Symbol;Acc:MGI:1924248]	-	-
ENSMUSG00000001103	7.12213	3.85387	6.9826	8.49837	8.69435	21.856	22.1394	35.3066	19.6605	29.7075	7.03027	25.734	-1.87595	7.83189e-05	0.00606682	Sebox	11	78503447	78505081	+	1359	protein_coding	SEBOX homeobox [Source:MGI Symbol;Acc:MGI:108012]	HB-other	HB->HB-other
ENSMUSG00000034224	0	3.85387	1.99503	3.18689	0.966039	6.95418	20.2142	30.4029	28.5077	6.99	2.00037	18.6138	-3.19461	7.91533e-05	0.00611095	Slc38a8	8	119479602	119501698	-	3499	protein_coding	solute carrier family 38, member 8 [Source:MGI Symbol;Acc:MGI:2685433]	-	-
ENSMUSG00000042213	39.1717	59.735	28.9279	32.9312	41.5397	135.11	71.2311	84.3435	79.625	87.375	40.4611	91.5368	-1.17514	8.03377e-05	0.00618172	Zfand4	6	116264222	116330302	+	4181	protein_coding	zinc finger, AN1-type domain 4 [Source:MGI Symbol;Acc:MGI:1914742]	-	-
ENSMUSG00000044294	1.18702	5.78081	0	3.18689	0	10.928	22.1394	22.557	24.5756	12.2325	2.03094	18.4865	-3.1756	8.2764e-05	0.00634726	Krt84	15	101525026	101532820	-	2640	protein_coding	keratin 84 [Source:MGI Symbol;Acc:MGI:96700]	-	-
ENSMUSG00000031374	0	0.963468	4.98757	4.24919	1.93208	14.9018	10.5884	42.1717	13.7623	16.6012	2.42646	19.6051	-3.00009	8.33987e-05	0.00637476	Zfp92	X	73411096	73428385	+	6744	protein_coding	zinc finger protein 92 [Source:MGI Symbol;Acc:MGI:108094]	C2H2	C2H2
ENSMUSG00000020656	24.9275	22.1598	13.9652	37.1804	31.8793	90.4043	47.1665	86.305	68.8117	48.0562	26.0224	68.1487	-1.38888	8.47709e-05	0.00644477	Grhl1	12	24572283	24617391	+	5539	protein_coding	grainyhead like transcription factor 1 [Source:MGI Symbol;Acc:MGI:2182540]	-	-
ENSMUSG00000073027	0	0	0	0	0	11.9214	2.88775	8.82664	7.8642	5.2425	0	7.34851	-5.27305	8.48731e-05	0.00644477	Dmrtc1b	X	102707865	102715209	+	1383	protein_coding	DMRT-like family C1b [Source:MGI Symbol;Acc:MGI:3639121]	-	-
ENSMUSG00000053441	352.546	511.602	221.448	421.732	482.053	488.779	788.355	755.168	1013.5	841.421	397.876	777.444	-0.966151	8.60376e-05	0.00651178	Adamts19	18	58836764	59053678	+	4666	protein_coding	a disintegrin-like and metallopeptidase (reprolysin type) with thrombospondin type 1 motif, 19 [Source:MGI Symbol;Acc:MGI:2442875]	-	-
ENSMUSG00000029321	14.2443	6.74428	6.9826	8.49837	9.66039	31.7905	28.8775	26.4799	33.4228	24.465	9.22598	29.0071	-1.66409	8.70516e-05	0.00656699	Slc10a6	5	103605711	103629403	-	2124	protein_coding	solute carrier family 10 (sodium/bile acid cotransporter family), member 6 [Source:MGI Symbol;Acc:MGI:1923000]	-	-
ENSMUSG00000039106	3.56107	0	3.99006	6.37378	2.89812	20.8625	26.9523	16.6725	12.7793	20.0962	3.3646	19.4726	-2.54823	8.74026e-05	0.00657199	Htr5a	5	27842149	27855088	+	5376	protein_coding	5-hydroxytryptamine (serotonin) receptor 5A [Source:MGI Symbol;Acc:MGI:96283]	-	-
ENSMUSG00000050468	0	10.5981	4.98757	48.8656	47.3359	151.005	280.111	331.49	271.315	204.457	22.3575	247.676	-3.46788	8.82773e-05	0.00661621	Astl	2	127338639	127357651	+	2560	protein_coding	astacin-like metalloendopeptidase (M12 family) [Source:MGI Symbol;Acc:MGI:3046414]	-	-
ENSMUSG00000017861	119.889	117.543	99.7514	181.653	170.989	319.892	241.608	190.263	252.637	273.484	137.965	255.577	-0.889305	8.97821e-05	0.00670722	Mybl2	2	163054687	163084688	+	4632	protein_coding	myeloblastosis oncogene-like 2 [Source:MGI Symbol;Acc:MGI:101785]	MYB	MYB->MYB
ENSMUSG00000024266	1.18702	0	0	0	0	1.98691	6.73808	18.634	5.89815	14.8537	0.237404	9.62218	-5.08826	9.11904e-05	0.00679045	Adad2	8	119612747	119616924	+	1926	protein_coding	adenosine deaminase domain containing 2 [Source:MGI Symbol;Acc:MGI:1923023]	-	-
novel.376	0	0	0	0	0	4.96727	3.85033	10.7881	9.83025	6.11625	0	7.11044	-5.22646	9.27049e-05	0.00686415	-	16	7457316	7459196	-	368	-	- && - && -	-	-
ENSMUSG00000032221	103.271	61.662	106.734	104.105	84.0454	347.709	167.489	169.668	129.759	188.73	91.9635	200.671	-1.12683	9.27748e-05	0.00686415	Mns1	9	72438011	72462025	+	5363	protein_coding	meiosis-specific nuclear structural protein 1 [Source:MGI Symbol;Acc:MGI:107933]	-	-
ENSMUSG00000024665	3634.66	2679.4	3609.01	2709.92	3941.44	2131.95	1727.84	2279.24	1415.56	2447.37	3314.89	2000.39	0.72859	9.35894e-05	0.00690229	Fads2	19	10064164	10101503	-	1508	protein_coding	fatty acid desaturase 2 [Source:MGI Symbol;Acc:MGI:1930079]	-	-
ENSMUSG00000019359	97.3358	59.735	68.8285	92.4198	209.63	367.578	202.142	323.644	189.724	225.427	105.59	261.703	-1.30849	9.49044e-05	0.0069685	Gdpd2	X	100729873	100738895	+	4609	protein_coding	glycerophosphodiester phosphodiesterase domain containing 2 [Source:MGI Symbol;Acc:MGI:1918834]	-	-
ENSMUSG00000047394	7.12213	5.78081	16.9577	10.623	17.3887	216.573	71.2311	93.1701	18.6775	3.495	11.5745	80.6293	-2.79671	9.50935e-05	0.0069685	Odf3b	15	89377449	89379282	-	1768	protein_coding	outer dense fiber of sperm tails 3B [Source:MGI Symbol;Acc:MGI:1917363]	-	-
ENSMUSG00000109841	0	0.963468	3.99006	7.43607	9.66039	12.9149	30.8026	38.2488	23.5926	29.7075	4.41	27.0533	-2.6023	9.53928e-05	0.0069685	E330011O21Rik	16	78250861	78302487	-	3227	processed_transcript	RIKEN cDNA E330011O21 gene [Source:MGI Symbol;Acc:MGI:3759668]	-	-
ENSMUSG00000022759	2.37404	13.4886	19.9503	13.8099	7.72831	686.477	143.425	187.321	10.8133	7.86375	11.4702	207.18	-4.17244	9.57682e-05	0.00697386	Lrrc74b	16	17544465	17561247	-	3941	protein_coding	leucine rich repeat containing 74B [Source:MGI Symbol;Acc:MGI:1921935]	-	-
ENSMUSG00000035189	192.298	115.616	232.421	298.505	392.212	439.107	563.111	721.823	440.395	481.436	246.21	529.174	-1.10348	9.74029e-05	0.00707059	Ano4	10	88948994	89344762	-	7265	protein_coding	anoctamin 4 [Source:MGI Symbol;Acc:MGI:2443344]	-	-
ENSMUSG00000074259	8.30916	25.0502	4.98757	3.18689	2.89812	209.619	48.1291	34.3258	26.5417	11.3587	8.88638	65.9948	-2.88752	0.000102369	0.00740776	Gramd2	9	59680144	59718874	+	6138	protein_coding	GRAM domain containing 2 [Source:MGI Symbol;Acc:MGI:3528937]	-	-
novel.529	424.954	231.232	344.142	277.259	437.616	169.881	153.051	261.857	173.012	144.169	343.041	180.394	0.927332	0.000103478	0.00746462	-	19	3223690	3228796	+	5107	-	- && sp|P21414|POL_GALV Gag-Pol polyprotein OS=Gibbon ape leukemia virus OX=11840 GN=pol PE=3 SV=2 && PF01140:Matrix protein (MA), p15	-	-
ENSMUSG00000048520	15.4313	26.9771	34.913	49.9279	44.4378	123.188	50.0543	119.65	80.608	82.1325	34.3374	91.1266	-1.40385	0.000104978	0.00754927	Fbxl13	5	21483847	21645634	-	5439	protein_coding	F-box and leucine-rich repeat protein 13 [Source:MGI Symbol;Acc:MGI:2443416]	-	-
ENSMUSG00000106555	0	1.92694	2.99254	7.43607	1.93208	8.94108	7.70066	49.0369	25.5586	25.3387	2.85753	23.3152	-3.02235	0.000108685	0.00777426	Gm2479	5	123007299	123015080	-	1117	antisense	predicted gene 2479 [Source:MGI Symbol;Acc:MGI:3780646]	-	-
ENSMUSG00000042477	17.8053	5.78081	10.9727	11.6853	45.4038	73.5156	67.3808	65.7095	62.9136	50.6775	18.3296	64.0394	-1.80142	0.00010878	0.00777426	Tfap2e	4	126716006	126736240	-	2085	protein_coding	transcription factor AP-2, epsilon [Source:MGI Symbol;Acc:MGI:2679630]	-	-
ENSMUSG00000109009	0	1.92694	0.997514	0	5.79623	20.8625	12.5136	14.7111	12.7793	20.0962	1.74414	16.1925	-3.16727	0.000109255	0.00778405	Gm44929	7	144764763	144770571	+	1653	lincRNA	predicted gene 44929 [Source:MGI Symbol;Acc:MGI:5753505]	-	-
ENSMUSG00000020696	187.55	176.315	170.575	173.154	147.804	311.944	231.02	284.414	296.873	225.427	171.079	269.936	-0.658261	0.000109675	0.00778997	Rffl	11	82802449	82871210	-	5922	protein_coding	ring finger and FYVE like domain containing protein [Source:MGI Symbol;Acc:MGI:1914588]	-	-
ENSMUSG00000026255	2699.29	4107.26	2784.06	2673.8	3072	1549.79	1641.2	2241.97	2017.17	2199.23	3067.28	1929.87	0.668509	0.000110259	0.00780739	Efhd1	1	87264363	87310839	+	2125	protein_coding	EF hand domain containing 1 [Source:MGI Symbol;Acc:MGI:1921607]	-	-
ENSMUSG00000019528	737.141	807.386	751.128	848.775	670.431	1025.24	1042.48	1197.48	980.075	1057.24	762.972	1060.5	-0.475103	0.000112725	0.00795761	Gyg	3	20122084	20155317	-	2344	protein_coding	glycogenin [Source:MGI Symbol;Acc:MGI:1351614]	-	-
ENSMUSG00000022040	18782.3	16495.5	20190.7	20202.8	18644.6	14581.9	11731	12938.9	15495.4	10873.8	18863.2	13124.2	0.523357	0.000113924	0.00801104	Ephx2	14	66084374	66124500	-	2484	protein_coding	epoxide hydrolase 2, cytoplasmic [Source:MGI Symbol;Acc:MGI:99500]	-	-
ENSMUSG00000040084	834.477	576.154	494.767	605.509	741.918	988.487	1192.64	857.165	999.736	1179.56	650.565	1043.52	-0.682384	0.000114753	0.00801104	Bub1b	2	118598211	118641591	+	4275	protein_coding	BUB1B, mitotic checkpoint serine/threonine kinase [Source:MGI Symbol;Acc:MGI:1333889]	-	-
ENSMUSG00000090336	0	0	0	0	0	40.7316	4.81291	9.80738	4.91512	0	0	12.0534	-5.98674	0.000114776	0.00801104	Cfap97d2	8	13705889	13743414	+	4799	protein_coding	CFAP97 domain containing 2 [Source:MGI Symbol;Acc:MGI:2685952]	-	-
ENSMUSG00000022262	5.93511	18.3059	65.8359	9.56067	2.89812	3719.49	394.659	396.218	6.88117	6.11625	20.5071	904.673	-5.46237	0.00011487	0.00801104	Dnah5	15	28203752	28472052	+	15637	protein_coding	dynein, axonemal, heavy chain 5 [Source:MGI Symbol;Acc:MGI:107718]	-	-
ENSMUSG00000030865	148.378	93.4564	125.687	114.728	158.43	247.37	240.646	196.148	174.978	268.241	128.136	225.477	-0.816806	0.000115284	0.00801572	Chp2	7	122219496	122222824	+	1603	protein_coding	calcineurin-like EF hand protein 2 [Source:MGI Symbol;Acc:MGI:1917511]	-	-
ENSMUSG00000046196	0	0	0	0	0	14.9018	11.551	3.92295	2.94907	4.36875	0	7.53871	-5.3102	0.000121321	0.0084101	Ttc39d	17	80207460	80217936	+	2438	protein_coding	tetratricopeptide repeat domain 39D [Source:MGI Symbol;Acc:MGI:1914987]	-	-
ENSMUSG00000039913	0	0.963468	0	8.49837	9.66039	24.8363	38.5033	17.6533	24.5756	41.94	3.82445	29.5017	-2.93685	0.000123358	0.00852571	Pak7	2	136081104	136387967	-	6505	protein_coding	p21 (RAC1) activated kinase 7 [Source:MGI Symbol;Acc:MGI:1920334]	-	-
ENSMUSG00000026327	0	0	0	0	1.93208	142.064	22.1394	11.7689	3.9321	1.7475	0.386416	36.3303	-6.42566	0.000129288	0.0089089	Serpinb11	1	107361198	107380475	+	2186	protein_coding	serine (or cysteine) peptidase inhibitor, clade B (ovalbumin), member 11 [Source:MGI Symbol;Acc:MGI:1914207]	-	-
ENSMUSG00000025498	555.526	366.118	594.518	367.555	511.035	313.931	261.822	256.953	337.177	186.982	478.95	271.373	0.82006	0.000132394	0.00909582	Irf7	7	141262706	141266481	-	3776	protein_coding	interferon regulatory factor 7 [Source:MGI Symbol;Acc:MGI:1859212]	-	-
ENSMUSG00000041498	142.443	104.055	114.714	147.659	150.702	247.37	223.319	193.205	210.367	197.467	131.915	214.346	-0.701318	0.000132853	0.0091002	Kif14	1	136466343	136531511	+	10358	protein_coding	kinesin family member 14 [Source:MGI Symbol;Acc:MGI:1098226]	-	-
ENSMUSG00000068617	7.12213	20.2328	23.9403	20.1836	14.4906	413.277	80.8569	181.437	15.7284	33.2025	17.1939	144.9	-3.07271	0.000133445	0.00911377	Efcab1	16	14906606	14981371	+	4431	protein_coding	EF-hand calcium binding domain 1 [Source:MGI Symbol;Acc:MGI:1914043]	-	-
ENSMUSG00000025510	5092.33	4623.68	5136.2	4946.05	4352.01	3954.94	3298.77	3073.63	3830.85	3488.01	4830.05	3529.24	0.452644	0.000134182	0.00913705	Cd151	7	141467392	141471473	+	2741	protein_coding	CD151 antigen [Source:MGI Symbol;Acc:MGI:1096360]	-	-
ENSMUSG00000067786	448.694	248.575	268.331	453.601	512.967	709.326	622.791	899.337	582.934	719.97	386.434	706.871	-0.871742	0.000134624	0.00914019	Nnat	2	157560078	157562522	+	1829	protein_coding	neuronatin [Source:MGI Symbol;Acc:MGI:104716]	-	-
ENSMUSG00000036641	3.56107	9.63468	7.98011	9.56067	15.4566	93.3847	37.5407	57.8636	14.7454	15.7275	9.23863	43.8524	-2.23632	0.000137252	0.00929127	Ccdc148	2	58821070	59160683	-	9929	protein_coding	coiled-coil domain containing 148 [Source:MGI Symbol;Acc:MGI:3039583]	-	-
ENSMUSG00000091694	7.12213	26.0136	98.7539	113.666	17.3887	8.94108	17.3265	4.90369	3.9321	0.87375	52.5888	7.19542	2.87394	0.000138786	0.00935384	Apol11b	15	77633946	77643286	-	2463	protein_coding	apolipoprotein L 11b [Source:MGI Symbol;Acc:MGI:3036248]	-	-
ENSMUSG00000041660	3.56107	4.81734	12.9677	2.12459	2.89812	324.859	52.942	75.5168	3.9321	6.99	5.27376	92.8481	-4.13468	0.000138987	0.00935384	Bbox1	2	110262697	110314560	-	4403	protein_coding	butyrobetaine (gamma), 2-oxoglutarate dioxygenase 1 (gamma-butyrobetaine hydroxylase) [Source:MGI Symbol;Acc:MGI:1891372]	-	-
ENSMUSG00000022487	7.12213	1.92694	3.99006	14.8721	12.5585	10.928	48.1291	50.9984	37.3549	38.445	8.09396	37.1711	-2.2029	0.000142064	0.00952309	Gtsf1	15	103402405	103430470	-	1390	protein_coding	gametocyte specific factor 1 [Source:MGI Symbol;Acc:MGI:1921424]	-	-
ENSMUSG00000021792	3299.92	2679.4	3490.3	2508.08	3196.62	1427.59	2043.56	2431.25	1876.59	1989.53	3034.87	1953.71	0.635371	0.000142327	0.00952309	Fam213a	14	40993740	41013788	-	2948	protein_coding	family with sequence similarity 213, member A [Source:MGI Symbol;Acc:MGI:1917814]	-	-
ENSMUSG00000107488	0	0	0.997514	2.12459	0	5.96072	18.2891	20.5955	8.84722	6.99	0.624421	12.1365	-4.29002	0.000145386	0.00969971	Gm31579	6	50909770	50910735	+	966	TEC	predicted gene, 31579 [Source:MGI Symbol;Acc:MGI:5590738]	-	-
ENSMUSG00000042401	9.49618	11.5616	5.98509	23.3705	9.66039	37.7512	37.5407	32.3644	39.321	34.95	12.0148	36.3855	-1.60142	0.000145897	0.00970571	Crtac1	19	42283037	42431783	-	2616	protein_coding	cartilage acidic protein 1 [Source:MGI Symbol;Acc:MGI:1920082]	-	-
novel.487	1.18702	16.379	23.9403	12.7476	23.1849	41.7251	109.734	54.9213	31.4568	69.0262	15.4878	61.3728	-1.97647	0.000150421	0.00995368	-	18	54477001	54485866	+	3619	-	- && - && -	-	-
ENSMUSG00000048899	34.4236	26.0136	38.9031	70.1116	57.9623	104.313	77.9692	121.612	108.133	92.6174	45.4828	100.929	-1.14936	0.000150487	0.00995368	Rimkla	4	119465283	119492628	-	4158	protein_coding	ribosomal modification protein rimK-like family member A [Source:MGI Symbol;Acc:MGI:3040686]	-	-
ENSMUSG00000037910	0	0	0	0	0.966039	6.95418	8.66324	6.86517	4.91512	10.485	0.193208	7.57654	-4.7435	0.000155494	0.0102555	1700018B24Rik	3	48605732	48609102	-	593	lincRNA	RIKEN cDNA 1700018B24 gene [Source:MGI Symbol;Acc:MGI:1913582]	-	-
ENSMUSG00000010307	13174.8	15226.6	16029.1	13443.4	16484.5	8112.54	9191.7	10822.4	11923.1	11078.3	14871.7	10225.6	0.540393	0.000156035	0.0102619	Tmem86a	7	47050601	47054777	+	1887	protein_coding	transmembrane protein 86A [Source:MGI Symbol;Acc:MGI:1915143]	-	-
ENSMUSG00000070529	28.4885	30.831	17.9553	54.1771	47.3359	35.7643	118.398	88.2664	110.099	168.634	35.7576	104.232	-1.54421	0.000156488	0.0102624	Wfdc10	2	164656046	164657368	+	459	protein_coding	WAP four-disulfide core domain 10 [Source:MGI Symbol;Acc:MGI:3616889]	-	-
ENSMUSG00000052861	17.8053	23.1232	46.8832	6.37378	15.4566	1612.38	217.544	181.437	13.7623	20.97	21.9284	409.218	-4.22128	0.000157491	0.010299	Dnah6	6	73017606	73221651	-	13247	protein_coding	dynein, axonemal, heavy chain 6 [Source:MGI Symbol;Acc:MGI:107744]	-	-
ENSMUSG00000046000	7.12213	0	6.9826	5.31148	9.66039	16.8887	27.9149	26.4799	29.4907	28.8337	5.81532	25.9216	-2.16209	0.00015863	0.0103441	Naa11	5	97382198	97392379	-	3424	protein_coding	N(alpha)-acetyltransferase 11, NatA catalytic subunit [Source:MGI Symbol;Acc:MGI:2141314]	GNAT	GNAT
ENSMUSG00000035179	3.56107	5.78081	0.997514	2.12459	1.93208	287.108	68.3433	100.035	3.9321	0	2.87921	91.8838	-4.99596	0.000161138	0.0104781	Ppp1r32	19	10474257	10482897	-	1458	protein_coding	protein phosphatase 1, regulatory subunit 32 [Source:MGI Symbol;Acc:MGI:1915002]	-	-
ENSMUSG00000067297	36.7977	22.1598	23.9403	40.3673	28.9812	72.5221	66.4182	74.5361	56.0324	55.0462	30.4492	64.911	-1.09724	0.000169238	0.0109487	Ifit1bl2	19	34617049	34640743	-	3367	protein_coding	interferon induced protein with tetratricopeptide repeats 1B like 2 [Source:MGI Symbol;Acc:MGI:2148249]	-	-
ENSMUSG00000053765	0	0	0	0	0.966039	4.96727	6.73808	14.7111	4.91512	7.86375	0.193208	7.83906	-4.79093	0.000169324	0.0109487	Oas1f	5	120847367	120857986	+	1480	protein_coding	2'-5' oligoadenylate synthetase 1F [Source:MGI Symbol;Acc:MGI:2180855]	-	-
ENSMUSG00000040812	4.74809	24.0867	21.9453	12.7476	26.0831	132.129	55.8298	97.0931	25.5586	35.8237	17.9221	69.2869	-1.94143	0.00016981	0.0109494	Agbl2	2	90782727	90834437	+	6650	protein_coding	ATP/GTP binding protein-like 2 [Source:MGI Symbol;Acc:MGI:2443254]	-	-
novel.1038	0	0	0.997514	0	0	33.7774	8.66324	10.7881	6.88117	0	0.199503	12.022	-5.40561	0.000170596	0.0109695	-	9	96525301	96527830	+	1296	-	- && - && -	-	-
ENSMUSG00000051517	74.7824	89.6025	76.8086	98.7936	122.687	106.3	206.955	232.435	186.775	164.265	92.5348	179.346	-0.95307	0.00017191	0.0110233	Arhgef39	4	43496142	43499695	-	2675	protein_coding	Rho guanine nucleotide exchange factor (GEF) 39 [Source:MGI Symbol;Acc:MGI:3036286]	-	-
ENSMUSG00000101337	34.4236	31.7944	49.8757	40.3673	78.2492	383.473	143.425	133.38	79.625	48.93	46.942	157.767	-1.74659	0.000176781	0.0113042	Dnah7c	1	46425592	46807476	+	12603	protein_coding	dynein, axonemal, heavy chain 7C [Source:MGI Symbol;Acc:MGI:3639762]	-	-
ENSMUSG00000034227	9.49618	26.9771	41.8956	11.6853	6.76227	2209.44	315.727	363.854	1.96605	8.7375	19.3633	579.945	-4.90366	0.000178706	0.0113957	Foxj1	11	116330704	116335399	-	2623	protein_coding	forkhead box J1 [Source:MGI Symbol;Acc:MGI:1347474]	-	-
ENSMUSG00000054321	200.607	289.04	236.411	302.754	334.249	334.794	504.393	570.79	417.785	465.708	272.612	458.694	-0.74966	0.000181174	0.0115213	Taf4b	18	14783245	14900359	+	5149	protein_coding	TATA-box binding protein associated factor 4b [Source:MGI Symbol;Acc:MGI:2152345]	-	-
ENSMUSG00000054136	20.1794	7.70774	5.98509	8.49837	7.72831	21.856	27.9149	35.3066	38.338	38.445	10.0198	32.3721	-1.7121	0.000186348	0.0118177	Adm2	15	89322720	89324731	+	1298	protein_coding	adrenomedullin 2 [Source:MGI Symbol;Acc:MGI:2675256]	-	-
ENSMUSG00000006711	10.6832	1.92694	1.99503	6.37378	2.89812	64.5745	30.8026	10.7881	14.7454	18.3487	4.77541	27.8519	-2.56941	0.000187619	0.0118658	D130043K22Rik	13	24845135	24901270	+	5276	protein_coding	RIKEN cDNA D130043K22 gene [Source:MGI Symbol;Acc:MGI:3036268]	-	-
ENSMUSG00000011267	8.30916	15.4155	27.9304	36.1181	34.7774	59.6072	64.493	83.3627	50.1343	73.395	24.5101	66.1984	-1.42809	0.000190732	0.0120297	Zfp296	7	19577287	19580656	+	2037	protein_coding	zinc finger protein 296 [Source:MGI Symbol;Acc:MGI:1926956]	C2H2	C2H2
ENSMUSG00000033949	21.3664	18.3059	22.9428	27.6197	11.5925	78.4828	50.0543	32.3644	56.0324	46.3087	20.3655	52.6485	-1.37345	0.000194192	0.0122145	Trim36	18	46165302	46212607	-	4849	protein_coding	tripartite motif-containing 36 [Source:MGI Symbol;Acc:MGI:106264]	Others	Others
ENSMUSG00000041617	10.6832	26.9771	14.9627	21.2459	23.1849	115.241	47.1665	53.9406	42.2701	34.0762	19.4108	58.5388	-1.58498	0.000194943	0.0122285	Ccdc74a	16	17646470	17650738	+	2289	protein_coding	coiled-coil domain containing 74A [Source:MGI Symbol;Acc:MGI:1919565]	-	-
novel.41	0	0	0	4.24919	0.966039	2.98036	12.5136	26.4799	24.5756	11.3587	1.04304	15.5816	-3.90978	0.000199362	0.0124718	-	1	64402499	64432121	-	704	-	- && - && -	-	-
ENSMUSG00000110311	0	0	0	3.18689	0.966039	11.9214	14.4387	10.7881	2.94907	28.8337	0.830586	13.7862	-4.06251	0.000202897	0.0126586	Gm45410	8	13391106	13392198	+	1093	TEC	predicted gene 45410 [Source:MGI Symbol;Acc:MGI:5791246]	-	-
ENSMUSG00000027173	34.4236	58.7715	90.7738	95.6067	111.094	140.077	168.452	180.456	143.522	193.972	78.134	165.296	-1.07808	0.000204853	0.0127215	Depdc7	2	104721784	104742878	-	2096	protein_coding	DEP domain containing 7 [Source:MGI Symbol;Acc:MGI:2139258]	-	-
ENSMUSG00000052551	0	0	0	1.0623	0.966039	7.94763	2.88775	16.6725	11.7963	9.61124	0.405667	9.78309	-4.53289	0.000205008	0.0127215	Adarb2	13	8202866	8768747	+	13114	protein_coding	adenosine deaminase, RNA-specific, B2 [Source:MGI Symbol;Acc:MGI:2151118]	-	-
ENSMUSG00000038651	2.37404	13.4886	2.99254	9.56067	13.5245	31.7905	21.1768	44.1332	46.2022	23.5912	8.38807	33.3788	-1.97714	0.000211281	0.0130471	Sycp2l	13	41114307	41174351	+	2823	protein_coding	synaptonemal complex protein 2-like [Source:MGI Symbol;Acc:MGI:2685114]	-	-
ENSMUSG00000033590	48.6679	75.1505	102.744	171.03	122.687	394.401	179.04	267.742	189.724	187.856	104.056	243.753	-1.2266	0.000211384	0.0130471	Myo5c	9	75232020	75305451	+	9697	protein_coding	myosin VC [Source:MGI Symbol;Acc:MGI:2442485]	-	-
ENSMUSG00000055409	18.9924	41.4291	21.9453	23.3705	22.2189	86.4305	51.9794	68.6517	62.9136	41.0662	25.5912	62.2083	-1.27475	0.000212009	0.0130485	Nell1	7	49974864	50866608	+	7271	protein_coding	NEL-like 1 [Source:MGI Symbol;Acc:MGI:2443902]	-	-
ENSMUSG00000105298	0	1.92694	0.997514	0	1.93208	16.8887	18.2891	7.84591	11.7963	5.2425	0.971306	12.0125	-3.57156	0.000212539	0.0130485	Cldn25-ps	9	49047602	49048294	-	693	processed_pseudogene	claudin 25, pseudogene [Source:MGI Symbol;Acc:MGI:3642767]	-	-
ENSMUSG00000034690	0	3.85387	2.99254	3.18689	0	5.96072	15.4013	39.2295	17.6944	11.3587	2.00666	17.929	-3.14029	0.000217319	0.0132966	Nlrp4c	7	6045161	6105150	+	4009	protein_coding	NLR family, pyrin domain containing 4C [Source:MGI Symbol;Acc:MGI:1890518]	-	-
ENSMUSG00000024749	0	0	0.997514	0	0.966039	3.97382	7.70066	12.7496	22.6096	4.36875	0.392711	10.2805	-4.60298	0.000217731	0.0132966	Tmc1	19	20783458	20954202	-	4073	protein_coding	transmembrane channel-like gene family 1 [Source:MGI Symbol;Acc:MGI:2151016]	-	-
ENSMUSG00000030431	179.24	243.757	248.381	232.643	215.427	146.038	127.061	125.534	164.165	152.032	223.89	142.966	0.648198	0.000223013	0.0135617	Tmem238	7	4784557	4789656	-	1439	protein_coding	transmembrane protein 238 [Source:MGI Symbol;Acc:MGI:1922935]	-	-
ENSMUSG00000030726	584.015	623.364	577.561	679.87	583.488	889.141	724.825	892.472	892.586	798.607	609.659	839.526	-0.461416	0.000223248	0.0135617	Pold3	7	100082111	100121565	-	4601	protein_coding	polymerase (DNA-directed), delta 3, accessory subunit [Source:MGI Symbol;Acc:MGI:1915217]	-	-
ENSMUSG00000018677	2892.77	3299.88	2995.54	2908.57	2702.01	2436.94	2107.09	2180.18	2356.31	2153.79	2959.75	2246.86	0.397672	0.00022824	0.0138286	Slc25a39	11	102402985	102407946	-	2756	protein_coding	solute carrier family 25, member 39 [Source:MGI Symbol;Acc:MGI:1196386]	-	-
ENSMUSG00000087401	0	0	0	0	0.966039	9.93454	5.77549	14.7111	4.91512	3.495	0.193208	7.76625	-4.77505	0.000230401	0.013923	Gm14664	X	61041741	61076068	+	437	lincRNA	predicted gene 14664 [Source:MGI Symbol;Acc:MGI:3705306]	-	-
ENSMUSG00000022177	208.916	242.794	203.493	215.646	235.713	270.219	334.016	372.681	346.025	314.55	221.312	327.498	-0.564559	0.000231466	0.0139508	Haus4	14	54541785	54554616	-	2378	protein_coding	HAUS augmin-like complex, subunit 4 [Source:MGI Symbol;Acc:MGI:1261794]	-	-
ENSMUSG00000038330	24.9275	22.1598	16.9577	48.8656	55.0642	94.3781	96.2582	102.978	67.8287	62.0362	33.595	84.6958	-1.33203	0.000236151	0.0141961	C87499	4	88627320	88634411	-	2170	protein_coding	expressed sequence C87499 [Source:MGI Symbol;Acc:MGI:2140706]	-	-
ENSMUSG00000000214	3.56107	1.92694	0.997514	10.623	1.93208	14.9018	19.2516	14.7111	20.6435	36.6975	3.80811	21.2411	-2.49808	0.000237591	0.0142456	Th	7	142892752	142931128	-	2364	protein_coding	tyrosine hydroxylase [Source:MGI Symbol;Acc:MGI:98735]	-	-
ENSMUSG00000022833	119.889	129.105	115.712	117.915	179.683	190.743	198.292	255.973	221.181	219.311	132.461	217.1	-0.711186	0.000244269	0.0146081	Ccdc14	16	34690616	34725202	+	9141	protein_coding	coiled-coil domain containing 14 [Source:MGI Symbol;Acc:MGI:2443448]	-	-
novel.31	0	0	0	0	0	1.98691	13.4762	8.82664	1.96605	9.61124	0	7.1734	-5.24152	0.000248171	0.014803	-	1	185831442	185832711	+	607	-	- && - && -	-	-
ENSMUSG00000025192	352.546	252.429	228.431	231.581	242.476	165.907	190.591	154.957	154.335	154.654	261.492	164.089	0.670713	0.000253274	0.0150309	Entpd7	19	43689672	43733697	+	8963	protein_coding	ectonucleoside triphosphate diphosphohydrolase 7 [Source:MGI Symbol;Acc:MGI:2135885]	-	-
ENSMUSG00000024799	569.771	447.049	311.224	401.548	293.676	185.776	251.234	180.456	309.653	169.507	404.654	219.325	0.883158	0.000253293	0.0150309	Tm7sf2	19	6062821	6077197	-	5593	protein_coding	transmembrane 7 superfamily member 2 [Source:MGI Symbol;Acc:MGI:1920416]	-	-
ENSMUSG00000028115	4.74809	11.5616	12.9677	3.18689	10.6264	194.717	28.8775	64.7287	8.84722	6.11625	8.61814	60.6573	-2.80798	0.000254946	0.0150902	Bnipl	3	95241271	95251193	-	2297	protein_coding	BCL2/adenovirus E1B 19kD interacting protein like [Source:MGI Symbol;Acc:MGI:2384749]	-	-
ENSMUSG00000114010	0	0	4.98757	3.18689	5.79623	9.93454	16.3639	20.5955	21.6265	25.3387	2.79414	18.7718	-2.72839	0.000255907	0.0151084	Gm47432	12	67651385	67658263	+	853	lincRNA	predicted gene, 47432 [Source:MGI Symbol;Acc:MGI:6096381]	-	-
ENSMUSG00000026679	5.93511	14.452	37.9055	22.3082	13.5245	232.468	77.0066	158.88	23.5926	10.485	18.8251	100.486	-2.41283	0.000256954	0.0151315	Enkur	2	21180731	21205365	-	1561	protein_coding	enkurin, TRPC channel interacting protein [Source:MGI Symbol;Acc:MGI:1918483]	-	-
ENSMUSG00000039543	41.5458	22.1598	23.9403	11.6853	21.2529	370.558	81.8195	78.4591	23.5926	26.2125	24.1168	116.128	-2.26968	0.0002611	0.0153365	Cfap70	14	20394193	20452226	-	4289	protein_coding	cilia and flagella associated protein 70 [Source:MGI Symbol;Acc:MGI:1923920]	-	-
ENSMUSG00000037683	1.18702	2.8904	15.9602	6.37378	6.76227	208.625	25.9897	31.3836	10.8133	5.2425	6.63474	56.4109	-3.08061	0.000269895	0.0158128	Armc3	2	19199302	19310241	+	2830	protein_coding	armadillo repeat containing 3 [Source:MGI Symbol;Acc:MGI:1918132]	-	-
ENSMUSG00000039021	0	3.85387	12.9677	3.18689	4.83019	163.92	30.8026	59.825	8.84722	0.87375	4.96773	52.8537	-3.40047	0.000271666	0.0158763	Ttc16	2	32757026	32775633	-	6388	protein_coding	tetratricopeptide repeat domain 16 [Source:MGI Symbol;Acc:MGI:2443048]	-	-
ENSMUSG00000042216	15.4313	34.6848	77.8061	28.682	25.117	354.663	55.8298	189.282	61.9305	55.92	36.3443	143.525	-1.97856	0.00027242	0.0158802	Sgsm1	5	113243220	113310786	-	7466	protein_coding	small G protein signaling modulator 1 [Source:MGI Symbol;Acc:MGI:107320]	-	-
ENSMUSG00000029212	24.9275	36.6118	13.9652	22.3082	17.3887	75.5025	32.7278	62.7672	70.7778	51.5512	23.0403	58.6653	-1.34755	0.000273831	0.0159222	Gabrb1	5	71658113	72149037	+	13838	protein_coding	gamma-aminobutyric acid (GABA) A receptor, subunit beta 1 [Source:MGI Symbol;Acc:MGI:95619]	-	-
ENSMUSG00000096140	0	6.74428	1.99503	1.0623	2.89812	65.5679	25.9897	18.634	2.94907	8.7375	2.53994	24.3757	-3.23363	0.000281139	0.016306	Ankrd66	17	43534188	43543639	-	1307	protein_coding	ankyrin repeat domain 66 [Source:MGI Symbol;Acc:MGI:1925106]	-	-
ENSMUSG00000076514	2.37404	0	2.99254	2.12459	1.93208	41.7251	8.66324	12.7496	2.94907	20.0962	1.88465	17.2366	-3.20467	0.000286748	0.0165897	Igkv17-121	6	68036812	68037318	+	363	IG_V_gene	immunoglobulin kappa variable 17-121 [Source:MGI Symbol;Acc:MGI:3647671]	-	-
ENSMUSG00000021363	7.12213	10.5981	34.913	7.43607	10.6264	262.272	42.3536	74.5361	26.5417	9.61124	14.1392	83.0629	-2.55024	0.000294381	0.0169887	Mak	13	41025008	41079706	-	7592	protein_coding	male germ cell-associated kinase [Source:MGI Symbol;Acc:MGI:96913]	-	-
ENSMUSG00000030483	0	0.963468	0	0	0	207.632	32.7278	43.1525	0	0.87375	0.192694	56.8772	-7.64971	0.000296542	0.0170708	Cyp2b10	7	25897620	25926624	+	2112	protein_coding	cytochrome P450, family 2, subfamily b, polypeptide 10 [Source:MGI Symbol;Acc:MGI:88598]	-	-
ENSMUSG00000033826	49.8549	34.6848	34.913	30.8066	59.8944	73.5156	89.5202	82.382	80.608	84.7537	42.0308	82.1559	-0.967892	0.000298347	0.017132	Dnah8	17	30624354	30875264	+	14583	protein_coding	dynein, axonemal, heavy chain 8 [Source:MGI Symbol;Acc:MGI:107714]	-	-
ENSMUSG00000039372	0	2.8904	3.99006	1.0623	4.83019	243.396	33.6904	56.8828	3.9321	0.87375	2.55459	67.755	-4.71603	0.000299459	0.0171531	2023-03-04	1	72427112	72536930	-	4553	protein_coding	membrane-associated ring finger (C3HC4) 4 [Source:MGI Symbol;Acc:MGI:2683550]	-	-
ENSMUSG00000113300	0	3.85387	1.99503	2.12459	10.6264	20.8625	11.551	20.5955	22.6096	33.2025	3.71998	21.7642	-2.52076	0.000306007	0.0174848	Gm49371	12	19560110	19564157	+	1464	lincRNA	predicted gene, 49371 [Source:MGI Symbol;Acc:MGI:6121588]	-	-
ENSMUSG00000059562	0	0.963468	0	1.0623	0	69.5418	3.85033	6.86517	4.91512	0	0.405153	17.0345	-5.3318	0.00031294	0.0178275	Ccdc154	17	25162461	25171913	+	2635	protein_coding	coiled-coil domain containing 154 [Source:MGI Symbol;Acc:MGI:2685163]	-	-
ENSMUSG00000038292	0	2.8904	4.98757	7.43607	17.3887	45.6989	27.9149	25.4992	33.4228	24.465	6.54055	31.4002	-2.24547	0.000313548	0.0178275	Ccdc155	7	45183624	45204892	-	2365	protein_coding	coiled-coil domain containing 155 [Source:MGI Symbol;Acc:MGI:2687329]	-	-
ENSMUSG00000020014	23.7404	24.0867	33.9155	22.3082	16.4227	707.339	150.163	132.4	15.7284	34.95	24.0947	208.116	-3.11044	0.00031825	0.0180503	Cfap54	10	92775619	93081618	-	14645	protein_coding	cilia and flagella associated protein 54 [Source:MGI Symbol;Acc:MGI:1922208]	-	-
ENSMUSG00000085743	1.18702	0	7.98011	3.18689	1.93208	62.5876	13.4762	43.1525	3.9321	8.7375	2.85722	26.3772	-3.20042	0.000321773	0.0182054	8430419K02Rik	11	18845851	18874309	-	2587	processed_transcript	RIKEN cDNA 8430419K02 gene [Source:MGI Symbol;Acc:MGI:1921768]	-	-
ENSMUSG00000031933	23.7404	10.5981	6.9826	19.1213	19.3208	31.7905	58.7175	67.6709	29.4907	43.6875	15.9527	46.2714	-1.54449	0.000322856	0.018222	Izumo1r	9	14885814	14903949	-	2320	protein_coding	IZUMO1 receptor, JUNO [Source:MGI Symbol;Acc:MGI:1929185]	-	-
ENSMUSG00000036882	52.229	55.8811	41.8956	47.8033	89.8416	90.4043	121.285	125.534	112.065	103.976	57.5301	110.653	-0.940979	0.000327774	0.0184337	Arhgap33	7	30522226	30535060	-	5336	protein_coding	Rho GTPase activating protein 33 [Source:MGI Symbol;Acc:MGI:2673998]	-	-
ENSMUSG00000047237	1.18702	9.63468	25.9354	72.2361	39.6076	132.129	152.088	272.645	161.216	199.215	29.7202	183.459	-2.62485	0.00032839	0.0184337	Fbxw21	9	109139447	109162041	-	2448	protein_coding	F-box and WD-40 domain protein 21 [Source:MGI Symbol;Acc:MGI:2443323]	-	-
ENSMUSG00000048012	32.0496	27.9406	24.9379	27.6197	25.117	72.5221	50.0543	70.6132	36.3719	68.1525	27.5329	59.5428	-1.11597	0.000329001	0.0184337	Zfp473	7	44731480	44751050	-	10037	protein_coding	zinc finger protein 473 [Source:MGI Symbol;Acc:MGI:2442697]	C2H2	C2H2
ENSMUSG00000024388	0	2.8904	3.99006	4.24919	0.966039	120.208	3.85033	23.5377	2.94907	5.2425	2.41914	31.1575	-3.67592	0.000329974	0.0184434	Myo7b	18	31959234	32036961	-	6621	protein_coding	myosin VIIB [Source:MGI Symbol;Acc:MGI:107709]	-	-
ENSMUSG00000019803	4.74809	4.81734	0.997514	5.31148	8.69435	39.7382	22.1394	12.7496	33.4228	10.485	4.91375	23.707	-2.26559	0.000331301	0.0184563	Nr2e1	10	42561963	42583632	-	3711	protein_coding	nuclear receptor subfamily 2, group E, member 1 [Source:MGI Symbol;Acc:MGI:1100526]	-	-
ENSMUSG00000040703	382.221	398.876	254.366	582.138	530.355	1468.32	746.001	797.34	564.256	703.368	429.591	855.858	-0.994277	0.000332643	0.0184563	Cyp2s1	7	25802475	25816913	-	4938	protein_coding	cytochrome P450, family 2, subfamily s, polypeptide 1 [Source:MGI Symbol;Acc:MGI:1921384]	-	-
ENSMUSG00000045404	18.9924	11.5616	28.9279	11.6853	17.3887	82.4567	55.8298	64.7287	13.7623	67.2787	17.7112	56.8112	-1.68207	0.00033288	0.0184563	Kcnk13	12	99964499	100062682	+	3112	protein_coding	potassium channel, subfamily K, member 13 [Source:MGI Symbol;Acc:MGI:2384976]	-	-
ENSMUSG00000042116	314.561	432.597	408.981	386.676	415.397	315.918	262.785	258.915	254.603	246.397	391.642	267.724	0.550353	0.000333404	0.0184563	Vwa1	4	155768149	155774698	-	3623	protein_coding	von Willebrand factor A domain containing 1 [Source:MGI Symbol;Acc:MGI:2179729]	-	-
ENSMUSG00000035984	13.0572	12.5251	33.9155	12.7476	10.6264	161.933	58.7175	77.4783	23.5926	19.2225	16.5744	68.1888	-2.03801	0.000334514	0.0184735	Nme5	18	34562634	34579115	-	1154	protein_coding	NME/NM23 family member 5 [Source:MGI Symbol;Acc:MGI:1922783]	-	-
ENSMUSG00000069476	7.12213	4.81734	10.9727	20.1836	3.86416	27.8167	29.8401	38.2488	44.2361	23.5912	9.39198	32.7466	-1.80678	0.000336353	0.0185238	Zfp616	11	74069955	74087292	+	5027	protein_coding	zinc finger protein 616 [Source:MGI Symbol;Acc:MGI:3650906]	C2H2	C2H2
ENSMUSG00000074354	20.1794	0.963468	12.9677	11.6853	23.1849	33.7774	52.942	58.8443	71.7608	33.2025	13.7961	50.1054	-1.86521	0.00033703	0.0185238	Arhgap20os	9	51832814	51875886	-	2647	antisense	Rho GTPase activating protein 20, opposite strand [Source:MGI Symbol;Acc:MGI:3027124]	-	-
ENSMUSG00000055629	10.6832	1.92694	6.9826	4.24919	12.5585	52.6531	18.2891	41.191	15.7284	24.465	7.28009	30.4653	-2.06945	0.000338598	0.0185658	B4galnt4	7	141061104	141072400	+	3852	protein_coding	beta-1,4-N-acetyl-galactosaminyl transferase 4 [Source:MGI Symbol;Acc:MGI:2652891]	-	-
ENSMUSG00000036086	329.992	233.159	241.398	223.082	311.065	464.936	415.836	389.353	373.549	386.197	267.739	405.974	-0.601417	0.00034374	0.0188008	Zranb3	1	127954184	128103047	-	9079	protein_coding	zinc finger, RAN-binding domain containing 3 [Source:MGI Symbol;Acc:MGI:1918362]	SNF2	SNF2
ENSMUSG00000112404	0	0	0	1.0623	1.93208	7.94763	5.77549	15.6918	13.7623	7.86375	0.598875	10.2082	-4.05765	0.000344512	0.0188008	AC159282.1	12	5808195	5984958	+	3381	lincRNA	novel transcript	-	-
ENSMUSG00000103079	2.37404	0	0	0	0	1.98691	8.66324	12.7496	15.7284	10.485	0.474809	9.92263	-4.55414	0.000346931	0.0188881	Gm36307	1	175574309	175578425	+	953	lincRNA	predicted gene, 36307 [Source:MGI Symbol;Acc:MGI:5595466]	-	-
ENSMUSG00000107254	0	0	0.997514	3.18689	0	4.96727	14.4387	17.6533	5.89815	16.6012	0.836881	11.9117	-3.84622	0.000347897	0.018894	Gm43769	5	65911624	65915946	+	4323	TEC	predicted gene 43769 [Source:MGI Symbol;Acc:MGI:5663906]	-	-
ENSMUSG00000050520	0	0	0.997514	0	7.72831	222.534	25.9897	33.3451	19.6605	6.11625	1.74517	61.529	-5.12032	0.000348676	0.018894	Cldn8	16	88560828	88563183	-	2356	protein_coding	claudin 8 [Source:MGI Symbol;Acc:MGI:1859286]	-	-
ENSMUSG00000055489	5.93511	15.4155	15.9602	16.9967	28.0151	252.337	34.653	160.841	5.89815	24.465	16.4645	95.6389	-2.53384	0.000350499	0.0189483	Ano5	7	51511029	51598709	+	7820	protein_coding	anoctamin 5 [Source:MGI Symbol;Acc:MGI:3576659]	-	-
ENSMUSG00000046856	16.6183	5.78081	17.9553	7.43607	20.2868	43.712	40.4285	52.9599	44.2361	22.7175	13.6155	40.8108	-1.58329	0.000355186	0.0191568	Gpr1	1	63182691	63214543	-	2496	protein_coding	G protein-coupled receptor 1 [Source:MGI Symbol;Acc:MGI:2385324]	-	-
ENSMUSG00000015880	224.347	228.342	268.331	416.42	337.148	435.133	514.019	404.064	529.85	589.781	294.918	494.569	-0.74584	0.000356191	0.0191662	Ncapg	5	45669919	45700546	+	7066	protein_coding	non-SMC condensin I complex, subunit G [Source:MGI Symbol;Acc:MGI:1930197]	-	-
ENSMUSG00000039431	20.1794	54.9177	41.8956	45.6787	59.8944	115.241	69.3059	119.65	119.929	71.6475	44.5132	99.1546	-1.14867	0.000360955	0.0193774	Mtmr7	8	40551095	40634797	-	4454	protein_coding	myotubularin related protein 7 [Source:MGI Symbol;Acc:MGI:1891693]	-	-
ENSMUSG00000074505	51.042	38.5387	64.8384	70.1116	63.7586	213.593	112.622	109.843	100.269	81.2587	57.6578	123.517	-1.09814	0.000369272	0.0197779	Fat3	9	15910189	16501285	-	21478	protein_coding	FAT atypical cadherin 3 [Source:MGI Symbol;Acc:MGI:2444314]	-	-
ENSMUSG00000070661	0	0	0	0	0	20.8625	3.85033	12.7496	6.88117	0	0	8.86873	-5.5437	0.000370255	0.0197846	Rnf186	4	138967112	138968360	+	1249	protein_coding	ring finger protein 186 [Source:MGI Symbol;Acc:MGI:1914075]	-	-
ENSMUSG00000026715	20.1794	11.5616	0.997514	15.9344	10.6264	21.856	42.3536	41.191	48.1682	57.6675	11.8599	42.2473	-1.84462	0.000372583	0.0198631	Serpinc1	1	160978585	161005863	+	8546	protein_coding	serine (or cysteine) peptidase inhibitor, clade C (antithrombin), member 1 [Source:MGI Symbol;Acc:MGI:88095]	-	-
ENSMUSG00000057265	24.9275	13.4886	18.9528	10.623	22.2189	128.156	50.0543	38.2488	40.304	28.8337	18.0421	57.1193	-1.66371	0.000380417	0.0201525	Bbof1	12	84409071	84442887	+	4257	protein_coding	basal body orientation factor 1 [Source:MGI Symbol;Acc:MGI:1920123]	-	-
ENSMUSG00000038570	17.8053	50.1003	39.9006	41.4296	28.9812	368.571	100.109	126.515	39.321	36.6975	35.6434	134.243	-1.91042	0.000380853	0.0201525	Saxo2	7	82632960	82648528	-	4784	protein_coding	stabilizer of axonemal microtubules 2 [Source:MGI Symbol;Acc:MGI:1914618]	-	-
ENSMUSG00000000253	233.843	196.547	238.406	214.584	210.596	838.475	297.438	560.002	237.892	352.121	218.795	457.185	-1.06316	0.000380879	0.0201525	Gmpr	13	45507444	45553800	+	2323	protein_coding	guanosine monophosphate reductase [Source:MGI Symbol;Acc:MGI:1913605]	-	-
ENSMUSG00000028937	934.186	1213.01	1017.46	1148.34	935.126	858.344	719.049	657.095	794.284	628.226	1049.63	731.399	0.521589	0.000381504	0.0201525	Acot7	4	152178134	152271855	+	2124	protein_coding	acyl-CoA thioesterase 7 [Source:MGI Symbol;Acc:MGI:1917275]	-	-
ENSMUSG00000031837	4.74809	4.81734	6.9826	2.12459	6.76227	25.8298	23.102	30.4029	13.7623	11.3587	5.08698	20.8911	-2.02878	0.000383522	0.0202128	Necab2	8	119446719	119472640	+	2096	protein_coding	N-terminal EF-hand calcium binding protein 2 [Source:MGI Symbol;Acc:MGI:2152211]	-	-
ENSMUSG00000064208	84.2786	70.3332	38.9031	76.4853	41.5397	20.8625	18.2891	35.3066	23.5926	32.3287	62.308	26.0759	1.25218	0.000385115	0.0202506	Gm10145	10	27936364	27936825	+	462	processed_pseudogene	predicted gene 10145 [Source:MGI Symbol;Acc:MGI:3704353]	-	-
novel.793	11.8702	2.8904	11.9702	9.56067	21.2529	76.4959	45.2414	35.3066	18.6775	33.2025	11.5089	41.7848	-1.8591	0.000386451	0.0202746	-	5	77587105	77588959	+	1855	-	- && sp|Q8VC26|TLCD2_MOUSE TLC domain-containing protein 2 OS=Mus musculus OX=10090 GN=Tlcd2 PE=2 SV=1 && -	-	-
ENSMUSG00000032023	0	1.92694	15.9602	2.12459	5.79623	145.044	30.8026	50.0176	5.89815	6.11625	5.1616	47.5758	-3.19277	0.000389448	0.0203855	Jhy	9	40894849	40964118	-	3343	protein_coding	junctional cadherin complex regulator [Source:MGI Symbol;Acc:MGI:1918239]	-	-
ENSMUSG00000033952	711.026	347.812	429.929	532.21	590.25	703.365	797.981	799.302	1010.55	1042.38	522.245	870.716	-0.738419	0.000397175	0.020743	Aspm	1	139454772	139494091	+	11590	protein_coding	abnormal spindle microtubule assembly [Source:MGI Symbol;Acc:MGI:1334448]	-	-
ENSMUSG00000059301	0	0	10.9727	7.43607	14.4906	25.8298	23.102	45.114	60.9475	34.0762	6.57986	37.8139	-2.51093	0.000403662	0.0210341	Gm5434	12	36090379	36091829	+	1451	transcribed_processed_pseudogene	predicted gene 5434 [Source:MGI Symbol;Acc:MGI:3646221]	-	-
ENSMUSG00000024411	3.56107	1.92694	0.997514	1.0623	0	63.581	17.3265	23.5377	0	4.36875	1.50956	21.7628	-3.87603	0.000422076	0.0219441	Aqp4	18	15389394	15403684	-	5082	protein_coding	aquaporin 4 [Source:MGI Symbol;Acc:MGI:107387]	-	-
ENSMUSG00000049565	1.18702	4.81734	1.99503	3.18689	7.72831	20.8625	24.0646	38.2488	3.9321	20.97	3.78292	21.6156	-2.49585	0.000428531	0.0221899	Aknad1	3	108739658	108782309	+	7472	protein_coding	AKNA domain containing 1 [Source:MGI Symbol;Acc:MGI:3584453]	-	-
ENSMUSG00000074123	3.56107	3.85387	0.997514	14.8721	12.5585	20.8625	40.4285	21.5762	36.3719	33.2025	7.16862	30.4883	-2.08641	0.000428724	0.0221899	7420426K07Rik	9	98903119	98904622	+	1504	protein_coding	RIKEN cDNA 7420426K07 gene [Source:MGI Symbol;Acc:MGI:3588253]	-	-
ENSMUSG00000084989	1.18702	5.78081	6.9826	9.56067	7.72831	314.925	71.2311	45.114	3.9321	5.2425	6.24788	88.0889	-3.81341	0.000431144	0.0222652	Crocc2	1	93168725	93231072	+	7132	protein_coding	ciliary rootlet coiled-coil, rootletin family member 2 [Source:MGI Symbol;Acc:MGI:3045962]	-	-
ENSMUSG00000024500	40.3588	37.5753	64.8384	45.6787	34.7774	783.835	102.996	378.565	55.0494	55.92	44.6457	275.273	-2.62404	0.000433845	0.0223547	Ppp2r2b	18	42637432	43059471	-	3985	protein_coding	protein phosphatase 2, regulatory subunit B, beta [Source:MGI Symbol;Acc:MGI:1920180]	-	-
ENSMUSG00000057280	3.56107	2.8904	0.997514	6.37378	4.83019	8.94108	20.2142	23.5377	24.5756	12.2325	3.73059	17.9002	-2.266	0.00043587	0.022409	Musk	4	58285960	58374303	+	3776	protein_coding	muscle, skeletal, receptor tyrosine kinase [Source:MGI Symbol;Acc:MGI:103581]	-	-
ENSMUSG00000034161	294.382	675.391	637.412	639.502	491.714	352.676	350.38	296.183	312.602	192.225	547.68	300.813	0.865555	0.000439252	0.0225326	Scx	15	76457452	76459458	+	2007	protein_coding	scleraxis [Source:MGI Symbol;Acc:MGI:102934]	bHLH	bHLH
ENSMUSG00000041431	447.507	430.67	396.013	643.752	585.42	515.603	899.052	812.051	951.568	1058.11	500.672	847.277	-0.759144	0.000451725	0.0231211	Ccnb1	13	100778650	100786570	-	4217	protein_coding	cyclin B1 [Source:MGI Symbol;Acc:MGI:88302]	-	-
ENSMUSG00000032056	132.946	61.662	87.7813	107.292	82.1133	145.044	164.602	220.666	155.318	161.644	94.359	169.455	-0.848836	0.000455024	0.0231971	Btg4	9	51060901	51119875	+	2556	protein_coding	B cell translocation gene 4 [Source:MGI Symbol;Acc:MGI:1860140]	-	-
ENSMUSG00000039057	0	0.963468	11.9702	5.31148	2.89812	40.7316	15.4013	19.6148	19.6605	24.465	4.22865	23.9746	-2.49071	0.000455219	0.0231971	Myo16	8	10153911	10634742	+	7910	protein_coding	myosin XVI [Source:MGI Symbol;Acc:MGI:2685951]	-	-
ENSMUSG00000066463	7.12213	11.5616	16.9577	5.31148	43.4718	60.6007	49.0917	48.0562	53.0833	71.6475	16.8849	56.4959	-1.73267	0.00046702	0.023746	Omt2a	9	78311972	78314796	-	1465	protein_coding	oocyte maturation, alpha [Source:MGI Symbol;Acc:MGI:106620]	-	-
ENSMUSG00000094635	0	0	3.99006	8.49837	1.93208	17.8822	27.9149	9.80738	21.6265	19.2225	2.8841	19.2907	-2.74096	0.000471137	0.0238746	Gm7104	12	88284538	88287069	-	2532	processed_pseudogene	predicted gene 7104 [Source:MGI Symbol;Acc:MGI:3779672]	-	-
ENSMUSG00000019734	39.1717	58.7715	137.657	91.3575	100.468	576.203	169.414	305.01	115.997	101.355	85.4852	253.596	-1.56711	0.000471617	0.0238746	Tmc4	7	3665790	3677553	-	4280	protein_coding	transmembrane channel-like gene family 4 [Source:MGI Symbol;Acc:MGI:2669035]	-	-
ENSMUSG00000034871	0	1.92694	2.99254	13.8099	5.79623	34.7709	21.1768	7.84591	52.1003	28.8337	4.90511	28.9455	-2.55678	0.000478721	0.0241304	Fam151a	4	106733889	106748292	+	1923	protein_coding	family with sequence simliarity 151, member A [Source:MGI Symbol;Acc:MGI:2657115]	-	-
ENSMUSG00000106831	30.8626	48.1734	24.9379	46.741	20.2868	45.6989	304.176	48.0562	33.4228	221.059	34.2003	130.483	-1.93254	0.000478762	0.0241304	Ube2n-ps1	5	76232612	76233070	-	459	processed_pseudogene	ubiquitin-conjugating enzyme E2N, pseudogene 1 [Source:MGI Symbol;Acc:MGI:894296]	-	-
novel.1046	0	0	0	1.0623	2.89812	4.96727	12.5136	14.7111	5.89815	17.475	0.792083	11.113	-3.77639	0.000485724	0.024428	-	9	118344191	118346371	+	558	-	- && - && -	-	-
ENSMUSG00000026360	2231.6	2745.88	2007	3439.72	3759.82	3135.34	5493.46	5545.09	4252.56	5636.56	2836.8	4812.6	-0.762514	0.000491513	0.0246654	Rgs2	1	143999338	144004161	-	3627	protein_coding	regulator of G-protein signaling 2 [Source:MGI Symbol;Acc:MGI:1098271]	-	-
ENSMUSG00000022375	17.8053	7.70774	2.99254	7.43607	20.2868	141.07	29.8401	60.8058	12.7793	24.465	11.2457	53.7921	-2.26044	0.000493017	0.0246872	Lrrc6	15	66379858	66500910	-	2084	protein_coding	leucine rich repeat containing 6 (testis) [Source:MGI Symbol;Acc:MGI:1859553]	-	-
ENSMUSG00000052131	2943.82	920.112	5.98509	10.623	5.79623	7.94763	9.62582	13.7303	57.9984	26.2125	777.266	23.1029	5.07213	0.000494545	0.0247101	Akr1b7	6	34412334	34423142	+	1281	protein_coding	aldo-keto reductase family 1, member B7 [Source:MGI Symbol;Acc:MGI:101918]	-	-
ENSMUSG00000041718	350.172	367.081	239.403	353.745	308.166	340.755	559.26	637.48	581.951	507.648	323.713	525.419	-0.699104	0.000495677	0.0247132	Alg13	X	144317804	144374450	+	6850	protein_coding	asparagine-linked glycosylation 13 [Source:MGI Symbol;Acc:MGI:1914824]	-	-
ENSMUSG00000020669	64.0992	54.9177	57.8558	54.1771	68.5888	103.319	90.4827	136.323	78.642	127.567	59.9277	107.267	-0.840986	0.000498995	0.0248065	Sh3yl1	12	30911668	30960162	+	2555	protein_coding	Sh3 domain YSC-like 1 [Source:MGI Symbol;Acc:MGI:1346118]	-	-
ENSMUSG00000025407	144.817	213.89	155.612	198.649	329.419	253.331	397.547	440.351	455.14	365.227	208.478	382.319	-0.873449	0.000499697	0.0248065	Gli1	10	127329882	127341974	-	4995	protein_coding	GLI-Kruppel family member GLI1 [Source:MGI Symbol;Acc:MGI:95727]	C2H2	C2H2
ENSMUSG00000026814	3288.05	2742.99	2254.38	2339.18	2186.15	1734.57	1702.81	1765.33	2021.1	1778.08	2562.15	1800.38	0.508849	0.000509349	0.0252314	Eng	2	32646595	32682669	+	4048	protein_coding	endoglin [Source:MGI Symbol;Acc:MGI:95392]	-	-
ENSMUSG00000006651	155.5	135.849	341.15	337.81	180.649	95.3716	113.585	119.65	133.691	115.335	230.192	115.527	0.994707	0.00052288	0.0258462	Aplp1	7	30434982	30445535	-	3017	protein_coding	amyloid beta (A4) precursor-like protein 1 [Source:MGI Symbol;Acc:MGI:88046]	-	-
ENSMUSG00000070806	0	2.8904	3.99006	8.49837	4.83019	92.3912	20.2142	30.4029	8.84722	3.495	4.04181	31.0701	-2.93296	0.000525166	0.0259016	Zmynd12	4	119422814	119467444	+	1869	protein_coding	zinc finger, MYND domain containing 12 [Source:MGI Symbol;Acc:MGI:2140259]	-	-
ENSMUSG00000086040	33.2366	33.7214	47.8807	74.3607	50.234	65.5679	100.109	101.997	94.3704	131.936	47.8867	98.796	-1.04534	0.000526245	0.0259016	Wipf3	6	54429603	54503768	+	7114	protein_coding	WAS/WASL interacting protein family, member 3 [Source:MGI Symbol;Acc:MGI:3044681]	-	-
ENSMUSG00000073433	24.9275	86.7121	55.8608	92.4198	91.7737	256.311	127.061	151.034	110.099	166.886	70.3388	162.278	-1.20273	0.00052769	0.0259174	Arhgdig	17	26196226	26207786	-	3252	protein_coding	Rho GDP dissociation inhibitor (GDI) gamma [Source:MGI Symbol;Acc:MGI:108430]	-	-
ENSMUSG00000071202	1.18702	3.85387	8.97763	2.12459	3.86416	318.899	65.4556	47.0754	9.83025	0	4.00145	88.252	-4.45736	0.00053205	0.0260761	Ccdc78	17	25786580	25790513	+	1651	protein_coding	coiled-coil domain containing 78 [Source:MGI Symbol;Acc:MGI:2685784]	-	-
ENSMUSG00000044835	2.37404	4.81734	4.98757	3.18689	5.79623	82.4567	16.3639	28.4414	1.96605	12.2325	4.23242	28.2921	-2.7304	0.000536722	0.0262493	Ankrd45	1	161142691	161170498	+	3735	protein_coding	ankyrin repeat domain 45 [Source:MGI Symbol;Acc:MGI:1921094]	-	-
ENSMUSG00000033676	108.019	90.566	81.7962	92.4198	54.0982	41.7251	34.653	51.9791	53.0833	39.3187	85.3798	44.1518	0.949944	0.000543709	0.0265348	Gabrb3	7	57419692	57828802	+	6542	protein_coding	gamma-aminobutyric acid (GABA) A receptor, subunit beta 3 [Source:MGI Symbol;Acc:MGI:95621]	-	-
ENSMUSG00000075395	0	0	0	1.0623	0	3.97382	3.85033	5.88443	19.6605	3.495	0.212459	7.37281	-4.70041	0.00054762	0.0266693	A630010A05Rik	16	14562317	14634108	+	3375	protein_coding	RIKEN cDNA A630010A05 gene [Source:MGI Symbol;Acc:MGI:3584518]	-	-
ENSMUSG00000060268	4.74809	2.8904	3.99006	9.56067	1.93208	91.3977	15.4013	15.6918	20.6435	4.36875	4.62426	29.5006	-2.67964	0.000549669	0.0266854	Armh1	4	117213333	117252125	-	2463	protein_coding	armadillo-like helical domain containing 1 [Source:MGI Symbol;Acc:MGI:2686507]	-	-
ENSMUSG00000097466	9.49618	1.92694	2.99254	8.49837	4.83019	101.332	19.2516	38.2488	4.91512	9.61124	5.54884	34.6718	-2.65494	0.000550263	0.0266854	D430036J16Rik	9	81631551	81645156	+	2234	antisense	RIKEN cDNA D430036J16 gene [Source:MGI Symbol;Acc:MGI:2441977]	-	-
ENSMUSG00000046591	175.679	127.178	72.8185	189.089	199.97	281.147	285.887	227.531	338.16	287.464	152.947	284.038	-0.89397	0.000553083	0.026766	Ticrr	7	79660196	79698148	+	10007	protein_coding	TOPBP1-interacting checkpoint and replication regulator [Source:MGI Symbol;Acc:MGI:1924261]	-	-
ENSMUSG00000032489	77.1564	25.0502	56.8583	33.9935	31.8793	445.067	107.809	143.188	64.8796	40.1925	44.9875	160.227	-1.83458	0.000560583	0.0270722	Kif9	9	110476958	110525179	+	4298	protein_coding	kinesin family member 9 [Source:MGI Symbol;Acc:MGI:1098237]	-	-
ENSMUSG00000072679	0	0.963468	1.99503	16.9967	2.89812	35.7643	23.102	14.7111	31.4568	34.95	4.57067	27.9968	-2.61772	0.000579276	0.0278713	D6Ertd474e	6	143245888	143297272	+	2509	lincRNA	DNA segment, Chr 6, ERATO Doi 474, expressed [Source:MGI Symbol;Acc:MGI:1196315]	-	-
ENSMUSG00000031255	770.377	681.172	678.31	1055.92	1352.45	1106.71	1794.25	1456.4	1495.18	1971.18	907.647	1564.74	-0.785698	0.000579545	0.0278713	Sytl4	X	133936385	133981812	-	5125	protein_coding	synaptotagmin-like 4 [Source:MGI Symbol;Acc:MGI:1351606]	-	-
ENSMUSG00000022034	134.134	139.703	119.702	234.767	171.955	213.593	308.989	238.319	275.247	352.121	160.052	277.654	-0.795358	0.000581546	0.0279055	Esco2	14	65819038	65833994	-	6648	protein_coding	establishment of sister chromatid cohesion N-acetyltransferase 2 [Source:MGI Symbol;Acc:MGI:1919238]	-	-
ENSMUSG00000086022	0	0	0	0	0	4.96727	7.70066	2.94221	4.91512	6.99	0	5.50305	-4.85877	0.000582674	0.0279055	Rad51ap2	12	11456079	11462928	+	3175	protein_coding	RAD51 associated protein 2 [Source:MGI Symbol;Acc:MGI:3644580]	-	-
ENSMUSG00000009070	2.37404	0.963468	0.997514	4.24919	3.86416	93.3847	26.9523	15.6918	0	4.36875	2.48967	28.0795	-3.49765	0.000584264	0.0279237	Rsph14	10	74957477	75032586	-	3012	protein_coding	radial spoke head homolog 14 (Chlamydomonas) [Source:MGI Symbol;Acc:MGI:1918486]	-	-
ENSMUSG00000046585	0	0.963468	0	3.18689	0	190.743	35.6155	35.3066	0	6.99	0.830071	53.731	-6.01837	0.000588194	0.0280534	Cfap58	19	47937712	48035379	+	3345	protein_coding	cilia and flagella associated protein 58 [Source:MGI Symbol;Acc:MGI:2685815]	-	-
ENSMUSG00000054753	0	0	0	0	0	8.94108	3.85033	2.94221	6.88117	5.2425	0	5.57146	-4.87456	0.00059584	0.0283595	AU018091	7	3154658	3169203	-	3653	protein_coding	expressed sequence AU018091 [Source:MGI Symbol;Acc:MGI:2142124]	-	-
ENSMUSG00000010796	10.6832	1.92694	1.99503	8.49837	4.83019	14.9018	25.0271	22.557	30.4738	17.475	5.58675	22.0869	-2.00736	0.000599786	0.0284406	Asz1	6	18050964	18109061	-	2829	protein_coding	ankyrin repeat, SAM and basic leucine zipper domain containing 1 [Source:MGI Symbol;Acc:MGI:1921318]	-	-
novel.164	0	0	0	0	0	5.96072	7.70066	2.94221	11.7963	1.7475	0	6.02948	-4.98705	0.000600007	0.0284406	-	11	7746193	7777341	-	303	-	- && - && -	-	-
ENSMUSG00000026649	65.2862	82.8583	123.692	89.2329	43.4718	483.812	180.003	303.048	94.3704	81.2587	80.9082	228.498	-1.49711	0.000624658	0.0294929	Cfap126	1	171113918	171126967	+	1774	protein_coding	cilia and flagella associated protein 126 [Source:MGI Symbol;Acc:MGI:1922722]	-	-
ENSMUSG00000037725	244.527	210.036	213.468	270.886	235.713	229.488	350.38	408.968	515.105	476.193	234.926	396.027	-0.754138	0.000624762	0.0294929	Ckap2	8	22168160	22185819	-	3215	protein_coding	cytoskeleton associated protein 2 [Source:MGI Symbol;Acc:MGI:1931797]	-	-
ENSMUSG00000032854	0	2.8904	3.99006	1.0623	0	9.93454	10.5884	27.4607	12.7793	6.99	1.58855	13.5506	-3.06308	0.000629084	0.0296363	Ugt8a	3	125865271	125938619	-	4536	protein_coding	UDP galactosyltransferase 8A [Source:MGI Symbol;Acc:MGI:109522]	-	-
ENSMUSG00000026189	187.55	168.607	173.567	234.767	221.223	229.488	314.764	382.488	321.449	293.58	197.143	308.354	-0.645455	0.000631579	0.0296474	Pecr	1	72259167	72284314	-	1516	protein_coding	peroxisomal trans-2-enoyl-CoA reductase [Source:MGI Symbol;Acc:MGI:2148199]	-	-
ENSMUSG00000068748	78.3435	88.6391	89.7763	103.043	143.94	166.9	183.853	236.358	115.014	221.932	100.748	184.812	-0.874035	0.000631888	0.0296474	Ptprz1	6	22875502	23052916	+	14245	protein_coding	protein tyrosine phosphatase, receptor type Z, polypeptide 1 [Source:MGI Symbol;Acc:MGI:97816]	-	-
ENSMUSG00000049571	0	7.70774	11.9702	1.0623	12.5585	413.277	63.5304	53.9406	23.5926	6.11625	6.65974	112.091	-4.06617	0.000644235	0.0301654	Cfap46	7	139600951	139683817	-	9224	protein_coding	cilia and flagella associated protein 46 [Source:MGI Symbol;Acc:MGI:2444387]	-	-
ENSMUSG00000039238	33.2366	37.5753	21.9453	25.4951	56.0303	96.365	72.1937	59.825	59.9645	85.6275	34.8565	74.7951	-1.09892	0.000652227	0.0304777	Zfp750	11	121510978	121519333	-	3232	protein_coding	zinc finger protein 750 [Source:MGI Symbol;Acc:MGI:2442210]	C2H2	C2H2
ENSMUSG00000019996	248.088	231.232	292.272	243.266	298.506	493.747	367.706	503.119	322.432	346.005	262.673	406.602	-0.629593	0.000660635	0.0307963	Map7	10	20148471	20281590	+	7935	protein_coding	microtubule-associated protein 7 [Source:MGI Symbol;Acc:MGI:1328328]	-	-
ENSMUSG00000033688	0	0.963468	0	6.37378	0.966039	36.7578	13.4762	10.7881	15.7284	4.36875	1.66066	16.2238	-3.29027	0.000662022	0.0307963	1300017J02Rik	9	103250521	103305082	-	4508	protein_coding	RIKEN cDNA 1300017J02 gene [Source:MGI Symbol;Acc:MGI:1919025]	-	-
ENSMUSG00000027111	1997.76	1878.76	1773.58	2185.14	1521.51	3275.42	2398.76	2446.94	2757.38	2404.56	1871.35	2656.61	-0.505616	0.000663649	0.0307963	Itga6	2	71745616	71858416	+	9025	protein_coding	integrin alpha 6 [Source:MGI Symbol;Acc:MGI:96605]	-	-
ENSMUSG00000038080	417.832	502.93	497.76	463.161	349.706	728.202	561.186	773.802	637	578.422	446.278	655.722	-0.554771	0.000664381	0.0307963	Kdm1b	13	47043499	47085279	+	5495	protein_coding	lysine (K)-specific demethylase 1B [Source:MGI Symbol;Acc:MGI:2145261]	SWI/SNF-SWI3	SWI/SNF-SWI3
ENSMUSG00000079620	0	0	0	0	0	31.7905	1.92516	12.7496	0	1.7475	0	9.64256	-5.66498	0.000666233	0.0308203	Muc4	16	32735886	32782391	+	11757	protein_coding	mucin 4 [Source:MGI Symbol;Acc:MGI:2153525]	-	-
ENSMUSG00000025270	108.019	101.164	60.8484	45.6787	26.0831	29.8036	25.9897	7.84591	14.7454	34.0762	68.3587	22.4922	1.59965	0.000671729	0.0310124	Alas2	X	150547375	150570638	+	2403	protein_coding	aminolevulinic acid synthase 2, erythroid [Source:MGI Symbol;Acc:MGI:87990]	-	-
ENSMUSG00000070837	0	3.85387	5.98509	9.56067	20.2868	31.7905	32.7278	47.0754	36.3719	21.8437	7.93729	33.9619	-2.08185	0.000673909	0.0310509	Aurkc	7	6995300	7003091	+	1523	protein_coding	aurora kinase C [Source:MGI Symbol;Acc:MGI:1321119]	-	-
ENSMUSG00000039748	147.191	105.981	87.7813	143.41	110.128	217.566	189.629	144.169	204.469	244.65	118.898	200.097	-0.754061	0.000677747	0.0311656	Exo1	1	175880581	175913489	+	8422	protein_coding	exonuclease 1 [Source:MGI Symbol;Acc:MGI:1349427]	-	-
ENSMUSG00000022208	24.9275	17.3424	32.918	23.3705	22.2189	302.01	33.6904	109.843	22.6096	29.7075	24.1555	99.572	-2.04305	0.00068461	0.0314185	Jph4	14	55106826	55116935	-	7064	protein_coding	junctophilin 4 [Source:MGI Symbol;Acc:MGI:2443113]	-	-
ENSMUSG00000067276	11.8702	23.1232	80.7987	53.1148	30.9132	82.4567	104.921	198.109	79.625	100.481	39.964	113.119	-1.49833	0.000686225	0.0314302	Capn6	X	143802231	143827414	-	7795	protein_coding	calpain 6 [Source:MGI Symbol;Acc:MGI:1100850]	-	-
ENSMUSG00000103486	0	0	0	0	0	7.94763	4.81291	8.82664	4.91512	1.7475	0	5.64996	-4.89279	0.000692766	0.0316669	Gm10657	9	58554799	58555829	+	1031	TEC	predicted gene 10657 [Source:MGI Symbol;Acc:MGI:3642259]	-	-
ENSMUSG00000032057	0	3.85387	13.9652	5.31148	9.66039	108.286	26.9523	67.6709	10.8133	5.2425	6.55819	43.7931	-2.72799	0.000697918	0.0317856	4833427G06Rik	9	51081115	51102078	-	973	protein_coding	RIKEN cDNA 4833427G06 gene [Source:MGI Symbol;Acc:MGI:1921013]	-	-
ENSMUSG00000038578	293.194	268.808	261.349	424.919	589.284	481.825	753.702	642.384	613.407	788.996	367.511	656.063	-0.835814	0.000698116	0.0317856	Susd1	4	59314683	59438633	-	4766	protein_coding	sushi domain containing 1 [Source:MGI Symbol;Acc:MGI:3651543]	-	-
ENSMUSG00000029228	23.7404	35.6483	35.9105	45.6787	102.4	95.3716	138.612	175.552	64.8796	142.421	48.6756	123.367	-1.33815	0.000700528	0.0318326	Lnx1	5	74592447	74702912	-	3829	protein_coding	ligand of numb-protein X 1 [Source:MGI Symbol;Acc:MGI:1278335]	-	-
ENSMUSG00000041377	17.8053	0.963468	0	13.8099	7.72831	22.8494	35.6155	68.6517	39.321	33.2025	8.06139	39.928	-2.32589	0.000703172	0.0318632	Ninj2	6	120093350	120200339	+	937	protein_coding	ninjurin 2 [Source:MGI Symbol;Acc:MGI:1352751]	-	-
ENSMUSG00000040729	117.515	105.981	146.635	115.79	121.721	612.961	242.571	250.088	182.843	116.209	121.528	280.934	-1.20832	0.000703961	0.0318632	Cep126	9	8076461	8134294	-	4616	protein_coding	centrosomal protein 126 [Source:MGI Symbol;Acc:MGI:2680221]	-	-
ENSMUSG00000106706	104.458	8.67121	20.9478	3.18689	2.89812	2.98036	2.88775	3.92295	4.91512	1.7475	28.0324	3.29074	3.08872	0.000707517	0.0319615	C530043K16Rik	5	66592462	66595570	-	3109	TEC	RIKEN cDNA C530043K16 gene [Source:MGI Symbol;Acc:MGI:2444587]	-	-
ENSMUSG00000010663	8838.57	5452.27	6957.66	6295.17	5170.24	5459.03	4323.92	3726.81	4251.58	3653.15	6542.78	4282.9	0.611264	0.000710295	0.031978	Fads1	19	10182888	10196870	+	3456	protein_coding	fatty acid desaturase 1 [Source:MGI Symbol;Acc:MGI:1923517]	-	-
ENSMUSG00000021791	0	1.92694	0.997514	0	1.93208	34.7709	15.4013	8.82664	1.96605	4.36875	0.971306	13.0667	-3.7017	0.000710653	0.031978	Dydc2	14	41049117	41069208	-	818	protein_coding	DPY30 domain containing 2 [Source:MGI Symbol;Acc:MGI:1918450]	-	-
ENSMUSG00000022621	157.874	210.036	170.575	195.463	247.306	307.971	267.598	257.934	325.381	340.762	196.251	299.929	-0.610494	0.00071338	0.0320383	Rabl2	15	89582533	89591923	-	2960	protein_coding	RAB, member RAS oncogene family-like 2 [Source:MGI Symbol;Acc:MGI:1915958]	-	-
ENSMUSG00000045328	633.87	440.305	466.837	449.351	539.05	611.968	793.168	651.21	890.62	799.481	505.882	749.289	-0.567552	0.00071483	0.032041	Cenpe	3	135212537	135273611	+	8620	protein_coding	centromere protein E [Source:MGI Symbol;Acc:MGI:1098230]	-	-
ENSMUSG00000001334	333.553	164.753	369.08	219.895	224.121	1429.58	359.043	471.735	394.193	426.39	262.281	616.188	-1.23249	0.000725211	0.032391	Fndc5	4	129136999	129144593	+	2763	protein_coding	fibronectin type III domain containing 5 [Source:MGI Symbol;Acc:MGI:1917614]	-	-
ENSMUSG00000110001	150.752	41.4291	65.8359	62.6755	73.419	143.057	163.639	230.473	144.505	148.537	78.8223	166.042	-1.07987	0.000725816	0.032391	C86187	7	46967711	46975911	-	2415	lincRNA	expressed sequence C86187 [Source:MGI Symbol;Acc:MGI:2142361]	-	-
ENSMUSG00000060716	192.298	202.328	164.59	257.076	284.015	496.727	339.792	386.411	282.128	319.792	220.061	364.97	-0.729161	0.000726846	0.032391	Plekhh1	12	79029163	79081655	+	6718	protein_coding	pleckstrin homology domain containing, family H (with MyTH4 domain) member 1 [Source:MGI Symbol;Acc:MGI:2144989]	-	-
ENSMUSG00000037145	22.5534	86.7121	413.968	846.65	24.151	28.8102	38.5033	6.86517	40.304	28.8337	278.807	28.6633	3.28192	0.000730665	0.0324474	2210407C18Rik	11	58608204	58616075	-	1399	protein_coding	RIKEN cDNA 2210407C18 gene [Source:MGI Symbol;Acc:MGI:1925604]	-	-
ENSMUSG00000066030	0	1.92694	16.9577	26.5574	17.3887	33.7774	71.2311	61.7865	64.8796	44.5612	12.5662	55.2472	-2.13189	0.000730924	0.0324474	Oog2	4	144190719	144196934	+	2481	protein_coding	oogenesin 2 [Source:MGI Symbol;Acc:MGI:2684035]	-	-
ENSMUSG00000099552	0	0	0	0	1.93208	11.9214	10.5884	8.82664	1.96605	9.61124	0.386416	8.58276	-4.34493	0.0007636	0.0338329	9830004L10Rik	1	80184719	80192073	+	2333	lincRNA	RIKEN cDNA 9830004L10 gene [Source:MGI Symbol;Acc:MGI:3642808]	-	-
ENSMUSG00000036598	0	7.70774	12.9677	4.24919	2.89812	171.868	17.3265	38.2488	3.9321	6.11625	5.56455	47.4982	-3.0833	0.000787042	0.0348047	Ccdc113	8	95534085	95558890	+	1288	protein_coding	coiled-coil domain containing 113 [Source:MGI Symbol;Acc:MGI:3606076]	-	-
ENSMUSG00000063704	11.8702	18.3059	21.9453	1.0623	9.66039	193.723	36.5781	104.939	10.8133	11.3587	12.5688	71.4825	-2.50444	0.000789447	0.0348443	Mapk15	15	75993769	75999154	+	2563	protein_coding	mitogen-activated protein kinase 15 [Source:MGI Symbol;Acc:MGI:2652894]	-	-
ENSMUSG00000097792	48.6679	61.662	60.8484	53.1148	44.4378	241.409	94.3331	113.766	72.7438	78.6375	53.7462	120.178	-1.15937	0.000799394	0.0352161	Gm27042	19	40589435	40594862	+	1097	lincRNA	predicted gene, 27042 [Source:MGI Symbol;Acc:MGI:5504157]	-	-
novel.33	8.30916	10.5981	14.9627	15.9344	15.4566	120.208	51.0169	66.6902	12.7793	11.3587	13.0522	52.4106	-2.00166	0.000802777	0.0352977	-	1	191817353	191819707	+	1398	-	- && - && -	-	-
ENSMUSG00000044783	3569.38	3161.14	2810	2829.96	3738.57	4150.65	4528.95	4120.08	5475.45	4142.45	3221.81	4483.51	-0.47677	0.00080852	0.0354827	Hjurp	1	88262471	88277633	-	8331	protein_coding	Holliday junction recognition protein [Source:MGI Symbol;Acc:MGI:2685821]	-	-
ENSMUSG00000094992	0	0.963468	0	9.56067	0.966039	20.8625	12.5136	24.5185	8.84722	24.465	2.29803	18.2414	-2.99623	0.000829101	0.036226	Fbxw25	9	109645122	109664652	-	1490	protein_coding	F-box and WD-40 domain protein 25 [Source:MGI Symbol;Acc:MGI:3588266]	-	-
ENSMUSG00000108237	0	7.70774	0	1.0623	5.79623	10.928	20.2142	42.1717	17.6944	12.2325	2.91325	20.6482	-2.79411	0.000829997	0.036226	Gm19757	6	105481266	105492668	-	2946	lincRNA	predicted gene, 19757 [Source:MGI Symbol;Acc:MGI:5011942]	-	-
ENSMUSG00000040891	112.767	43.3561	21.9453	37.1804	52.1661	7.94763	24.0646	5.88443	21.6265	20.97	53.483	16.0986	1.72612	0.000830165	0.036226	Foxa3	7	19013284	19023538	-	2037	protein_coding	forkhead box A3 [Source:MGI Symbol;Acc:MGI:1347477]	-	-
ENSMUSG00000041323	29.6756	29.8675	48.8782	56.3017	26.0831	716.28	148.238	166.725	31.4568	56.7937	38.1612	223.899	-2.55253	0.00085367	0.0371813	Ak7	12	105705976	105782447	+	4209	protein_coding	adenylate kinase 7 [Source:MGI Symbol;Acc:MGI:1926051]	-	-
ENSMUSG00000037138	587.576	327.579	466.837	604.447	732.258	1092.8	939.48	956.22	621.272	952.387	543.739	912.432	-0.747039	0.00087185	0.0379016	Aff3	1	38177326	38664955	-	6654	protein_coding	AF4/FMR2 family, member 3 [Source:MGI Symbol;Acc:MGI:106927]	-	-
ENSMUSG00000026669	153.126	178.242	124.689	162.531	158.43	239.422	243.533	179.475	249.688	364.354	155.404	255.295	-0.71692	0.000876202	0.0380193	Mcm10	2	4989714	5012791	-	7692	protein_coding	minichromosome maintenance 10 replication initiation factor [Source:MGI Symbol;Acc:MGI:1917274]	-	-
ENSMUSG00000026188	13.0572	3.85387	1.99503	7.43607	8.69435	29.8036	13.4762	17.6533	28.5077	37.5712	7.00731	25.4024	-1.87563	0.000894445	0.038738	Tmem169	1	72284369	72303104	+	3054	protein_coding	transmembrane protein 169 [Source:MGI Symbol;Acc:MGI:2442781]	-	-
ENSMUSG00000068323	4.74809	2.8904	7.98011	8.49837	5.79623	23.8429	12.5136	29.4221	23.5926	14.8537	5.98264	20.845	-1.79999	0.000897361	0.0387522	Slc4a5	6	83219828	83304945	+	5804	protein_coding	solute carrier family 4, sodium bicarbonate cotransporter, member 5 [Source:MGI Symbol;Acc:MGI:2443220]	-	-
ENSMUSG00000024791	85.4656	110.799	122.694	151.908	139.11	106.3	236.795	231.454	297.856	287.464	121.995	231.974	-0.926548	0.000898131	0.0387522	Cdca5	19	6084983	6091777	+	2129	protein_coding	cell division cycle associated 5 [Source:MGI Symbol;Acc:MGI:1915099]	-	-
ENSMUSG00000027699	331.179	334.323	250.376	402.61	335.216	379.499	497.655	474.677	563.273	585.412	330.741	500.103	-0.597141	0.000901311	0.0388169	Ect2	3	27097222	27153878	-	5386	protein_coding	ect2 oncogene [Source:MGI Symbol;Acc:MGI:95281]	-	-
ENSMUSG00000043020	0	3.85387	5.98509	2.12459	0	468.91	102.034	99.0546	0	1.7475	2.39271	134.349	-5.80544	0.000915244	0.0393436	Wdr63	3	146040526	146108130	-	3311	protein_coding	WD repeat domain 63 [Source:MGI Symbol;Acc:MGI:3045269]	-	-
ENSMUSG00000037541	41.5458	39.5022	57.8558	64.8001	49.268	549.38	84.7072	134.361	58.9815	47.1825	50.5944	174.922	-1.78901	0.000925126	0.0396944	Shank2	7	144001928	144424494	+	10768	protein_coding	SH3 and multiple ankyrin repeat domains 2 [Source:MGI Symbol;Acc:MGI:2671987]	-	-
ENSMUSG00000089804	0	0.963468	3.99006	0	0	25.8298	10.5884	17.6533	6.88117	2.62125	0.990705	12.7148	-3.64898	0.000929377	0.0398028	Gm16136	15	37231793	37233309	-	1294	antisense	predicted gene 16136 [Source:MGI Symbol;Acc:MGI:3802137]	-	-
ENSMUSG00000051860	0	0	0.997514	1.0623	2.89812	11.9214	11.551	12.7496	10.8133	3.495	0.991585	10.1061	-3.31281	0.000939839	0.0401764	Samd7	3	30746293	30767174	+	3999	protein_coding	sterile alpha motif domain containing 7 [Source:MGI Symbol;Acc:MGI:1923203]	-	-
novel.756	0	0	0	0	0	8.94108	0	15.6918	4.91512	6.11625	0	7.13285	-5.23097	0.000945348	0.0403372	-	4	40014074	40020950	-	414	-	- && - && -	-	-
ENSMUSG00000030994	67.6603	41.4291	40.8981	41.4296	38.6416	65.5679	77.0066	97.0931	81.591	102.229	46.0117	84.6975	-0.887401	0.000948578	0.0404003	D7Ertd443e	7	134265779	134385661	-	5969	protein_coding	DNA segment, Chr 7, ERATO Doi 443, expressed [Source:MGI Symbol;Acc:MGI:1196431]	-	-
ENSMUSG00000022899	75.9694	147.411	193.518	63.7378	33.8114	597.066	153.051	432.506	160.233	155.527	102.889	299.676	-1.54133	0.000963976	0.0409805	Slc15a2	16	36750177	36784962	-	7361	protein_coding	solute carrier family 15 (H+/peptide transporter), member 2 [Source:MGI Symbol;Acc:MGI:1890457]	-	-
ENSMUSG00000050533	2.37404	2.8904	2.99254	1.0623	5.79623	7.94763	4.81291	29.4221	14.7454	27.96	3.0231	16.9776	-2.47896	0.000974303	0.0412997	Gm9845	3	39358306	39358903	-	598	processed_pseudogene	predicted pseudogene 9845 [Source:MGI Symbol;Acc:MGI:3704215]	-	-
ENSMUSG00000074506	223.16	158.009	68.8285	194.4	43.4718	30.7971	8.66324	71.5939	32.4398	69.9	137.574	42.6788	1.68629	0.000976454	0.0412997	Gm10705	3	87207545	87208005	-	461	processed_pseudogene	predicted gene 10705 [Source:MGI Symbol;Acc:MGI:3708678]	-	-
ENSMUSG00000055942	7.12213	4.81734	5.98509	8.49837	8.69435	28.8102	27.9149	26.4799	5.89815	35.8237	7.02346	24.9854	-1.83448	0.000976851	0.0412997	Obox7	7	14659496	14665996	+	1602	protein_coding	oocyte specific homeobox 7 [Source:MGI Symbol;Acc:MGI:3646231]	HB-other	HB->HB-other
ENSMUSG00000113959	4.74809	6.74428	6.9826	16.9967	8.69435	17.8822	25.0271	25.4992	51.1173	22.7175	8.83321	28.4487	-1.68514	0.00101217	0.0426528	Gm46339	12	19301653	19305191	+	3539	TEC	predicted gene, 46339 [Source:MGI Symbol;Acc:MGI:5825976]	C2H2	C2H2
ENSMUSG00000029093	586.389	399.839	570.578	470.597	493.646	1195.12	718.086	650.229	724.489	695.505	504.21	796.687	-0.660226	0.00101255	0.0426528	Sorcs2	5	36017180	36398139	-	8802	protein_coding	sortilin-related VPS10 domain containing receptor 2 [Source:MGI Symbol;Acc:MGI:1932289]	-	-
ENSMUSG00000055789	1.18702	16.379	7.98011	57.364	53.1321	56.6269	181.928	216.743	210.367	165.139	27.2084	166.161	-2.60876	0.00101509	0.0426818	E330017A01Rik	16	58635167	58638739	-	1108	protein_coding	RIKEN cDNA E330017A01 gene [Source:MGI Symbol;Acc:MGI:3045360]	-	-
ENSMUSG00000055717	105.645	112.726	186.535	223.082	164.227	420.231	244.496	375.623	192.673	255.135	158.443	297.631	-0.908782	0.00101792	0.042723	Slain1	14	103650228	103704907	+	3284	protein_coding	SLAIN motif family, member 1 [Source:MGI Symbol;Acc:MGI:2145578]	-	-
ENSMUSG00000043541	23.7404	46.2465	39.9006	43.5541	61.8265	294.062	105.884	128.477	51.1173	43.6875	43.0536	124.646	-1.53033	0.00102301	0.0428586	Casc1	6	145174834	145211005	-	12207	protein_coding	cancer susceptibility candidate 1 [Source:MGI Symbol;Acc:MGI:2444480]	-	-
ENSMUSG00000078521	18.9924	28.904	26.9329	55.2394	59.8944	54.64	107.809	60.8058	115.997	108.345	37.9926	89.5194	-1.23395	0.00102582	0.0428988	Aunip	4	134510999	134523927	+	1275	protein_coding	aurora kinase A and ninein interacting protein [Source:MGI Symbol;Acc:MGI:1917135]	-	-
ENSMUSG00000061322	0	2.8904	7.98011	3.18689	0	291.082	54.8672	38.2488	5.89815	0.87375	2.81148	78.194	-4.79194	0.00102932	0.0429088	Dnaic1	4	41569775	41638158	+	2782	protein_coding	dynein, axonemal, intermediate chain 1 [Source:MGI Symbol;Acc:MGI:1916172]	-	-
ENSMUSG00000028845	8.30916	8.67121	11.9702	7.43607	16.4227	77.4894	25.0271	46.0947	16.7114	16.6012	10.5619	36.3848	-1.77762	0.00102979	0.0429088	Tekt2	4	126322121	126325688	-	1900	protein_coding	tektin 2 [Source:MGI Symbol;Acc:MGI:1346335]	-	-
ENSMUSG00000072419	3.56107	0	10.9727	4.24919	1.93208	29.8036	26.9523	25.4992	15.7284	8.7375	4.143	21.3442	-2.36621	0.0010324	0.0429088	Dppa2	16	48303908	48319723	+	2447	protein_coding	developmental pluripotency associated 2 [Source:MGI Symbol;Acc:MGI:2157523]	-	-
ENSMUSG00000028536	1.18702	0.963468	1.99503	1.0623	2.89812	23.8429	7.70066	33.3451	4.91512	1.7475	1.62119	14.3103	-3.12867	0.00103532	0.0429088	2610528J11Rik	4	118526999	118530228	+	1202	protein_coding	RIKEN cDNA 2610528J11 gene [Source:MGI Symbol;Acc:MGI:1913701]	-	-
ENSMUSG00000020826	224.347	342.031	265.339	463.161	455.004	333.8	789.318	689.459	561.307	938.407	349.977	662.458	-0.920345	0.00103667	0.0429088	Nos2	11	78920787	78960254	+	4412	protein_coding	nitric oxide synthase 2, inducible [Source:MGI Symbol;Acc:MGI:97361]	-	-
ENSMUSG00000059956	0	0.963468	0	1.0623	0.966039	34.7709	14.4387	4.90369	2.94907	0.87375	0.598361	11.5872	-4.24472	0.00103722	0.0429088	Serpinb12	1	106934449	106957080	+	2498	protein_coding	serine (or cysteine) peptidase inhibitor, clade B (ovalbumin), member 12 [Source:MGI Symbol;Acc:MGI:1919119]	-	-
ENSMUSG00000038298	0	3.85387	3.99006	8.49837	4.83019	16.8887	18.2891	19.6148	18.6775	13.98	4.2345	17.49	-2.03123	0.00104783	0.0432702	Pdzk1	3	96829284	96870926	+	3556	protein_coding	PDZ domain containing 1 [Source:MGI Symbol;Acc:MGI:1928901]	-	-
ENSMUSG00000051435	0	3.85387	13.9652	12.7476	7.72831	423.211	67.3808	98.0738	5.89815	6.11625	7.65899	120.136	-3.96854	0.0010546	0.043439	Fhad1	4	141890438	142015082	-	6141	protein_coding	forkhead-associated (FHA) phosphopeptide binding domain 1 [Source:MGI Symbol;Acc:MGI:1920323]	-	-
ENSMUSG00000041538	5.93511	13.4886	12.9677	8.49837	10.6264	106.3	31.7652	45.114	29.4907	4.36875	10.3032	43.4076	-2.06758	0.00105884	0.043439	H2-Ob	17	34238903	34245907	+	3153	protein_coding	histocompatibility 2, O region beta locus [Source:MGI Symbol;Acc:MGI:95925]	-	-
ENSMUSG00000021066	134.134	105.981	137.657	129.6	135.245	174.848	210.806	207.917	223.147	157.275	128.524	194.798	-0.599948	0.00105895	0.043439	Atl1	12	69892614	69966417	+	9175	protein_coding	atlastin GTPase 1 [Source:MGI Symbol;Acc:MGI:1921241]	-	-
ENSMUSG00000032010	116.328	94.4199	103.741	115.79	137.178	404.336	181.928	273.626	115.014	166.886	113.491	228.358	-1.00836	0.00105944	0.043439	Usp2	9	44067021	44095627	+	4818	protein_coding	ubiquitin specific peptidase 2 [Source:MGI Symbol;Acc:MGI:1858178]	-	-
ENSMUSG00000042788	0	0	2.99254	3.18689	1.93208	156.966	35.6155	36.2873	6.88117	0	1.6223	47.1499	-4.85515	0.00107246	0.0438949	Fam166b	4	43427019	43429134	-	1349	protein_coding	family with sequence similarity 166, member B [Source:MGI Symbol;Acc:MGI:2445194]	-	-
ENSMUSG00000105153	0	0	0.997514	7.43607	5.79623	4.96727	24.0646	32.3644	16.7114	21.8437	2.84596	19.9903	-2.80545	0.00111809	0.0456314	Gm3143	3	34699640	34716662	-	960	lincRNA	predicted gene 3143 [Source:MGI Symbol;Acc:MGI:3781322]	-	-
ENSMUSG00000071103	39.1717	56.8446	47.8807	50.9902	49.268	110.273	74.1188	119.65	86.5062	61.1625	48.831	90.3422	-0.883529	0.00111884	0.0456314	1700029J07Rik	8	45953606	45975252	-	2740	protein_coding	RIKEN cDNA 1700029J07 gene [Source:MGI Symbol;Acc:MGI:1916729]	-	-
ENSMUSG00000111270	13.0572	0	4.98757	2.12459	11.5925	14.9018	25.0271	42.1717	40.304	21.8437	6.35238	28.8497	-2.1947	0.00112656	0.0458652	Gm47066	9	120791986	120794882	+	1219	lincRNA	predicted gene, 47066 [Source:MGI Symbol;Acc:MGI:6095779]	-	-
ENSMUSG00000062312	531.786	402.73	470.827	374.991	467.563	1123.6	530.383	754.188	553.443	707.737	449.579	733.869	-0.707135	0.00113637	0.0461829	Erbb2	11	98412470	98437716	+	5210	protein_coding	erb-b2 receptor tyrosine kinase 2 [Source:MGI Symbol;Acc:MGI:95410]	-	-
ENSMUSG00000018919	65.2862	64.5524	55.8608	96.669	45.4038	30.7971	31.7652	35.3066	35.3889	35.8237	65.5544	33.8163	0.952636	0.00114326	0.0463812	Tm4sf5	11	70505244	70511178	+	1125	protein_coding	transmembrane 4 superfamily member 5 [Source:MGI Symbol;Acc:MGI:1922854]	-	-
ENSMUSG00000084897	157.874	149.338	117.707	210.335	170.023	157.959	244.496	254.992	416.802	463.961	161.055	307.642	-0.934536	0.00115175	0.046644	Gm14226	2	155018266	155027104	+	3243	protein_coding	predicted gene 14226 [Source:MGI Symbol;Acc:MGI:3649244]	-	-
ENSMUSG00000104988	0	0.963468	0	3.18689	0	8.94108	8.66324	3.92295	14.7454	12.2325	0.830071	9.70103	-3.5538	0.00117793	0.0476206	Gm43622	9	110252126	110254144	-	2019	TEC	predicted gene 43622 [Source:MGI Symbol;Acc:MGI:5663759]	-	-
ENSMUSG00000043621	16.6183	24.0867	51.8707	37.1804	21.2529	1425.61	239.683	270.684	9.83025	6.11625	30.2018	390.384	-3.69179	0.00118204	0.0477034	Ubxn10	4	138709837	138737167	-	4564	protein_coding	UBX domain protein 10 [Source:MGI Symbol;Acc:MGI:2443123]	-	-
ENSMUSG00000041040	738.328	786.19	801.004	936.945	793.118	1087.83	980.871	1075.87	1041.02	1071.22	811.117	1051.36	-0.374174	0.0011847	0.0477271	Fam117b	1	59913006	59985346	+	7290	protein_coding	family with sequence similarity 117, member B [Source:MGI Symbol;Acc:MGI:1920000]	-	-
ENSMUSG00000029695	22.5534	32.7579	53.8658	105.167	31.8793	340.755	81.8195	128.477	109.116	66.405	49.2447	145.314	-1.56042	0.00118823	0.047786	Aass	6	23072173	23132986	-	3817	protein_coding	aminoadipate-semialdehyde synthase [Source:MGI Symbol;Acc:MGI:1353573]	-	-
ENSMUSG00000032181	15.4313	8.67121	7.98011	18.059	12.5585	10.928	47.1665	57.8636	21.6265	63.7837	12.54	40.2737	-1.69043	0.00120334	0.0483095	Scg3	9	75643189	75684056	-	2738	protein_coding	secretogranin III [Source:MGI Symbol;Acc:MGI:103032]	-	-
ENSMUSG00000086710	0	0	0	1.0623	0	3.97382	4.81291	12.7496	3.9321	4.36875	0.212459	5.96743	-4.39621	0.00121212	0.0485773	Gm13465	2	45733457	45753311	+	979	lincRNA	predicted gene 13465 [Source:MGI Symbol;Acc:MGI:3649598]	-	-
ENSMUSG00000038768	3.56107	6.74428	0.997514	1.0623	11.5925	29.8036	16.3639	44.1332	8.84722	19.2225	4.79152	23.6741	-2.29048	0.00121752	0.0486449	9130409I23Rik	1	181051237	181060667	+	1898	protein_coding	RIKEN cDNA 9130409I23 gene [Source:MGI Symbol;Acc:MGI:3588271]	-	-
ENSMUSG00000023999	8.30916	7.70774	25.9354	3.18689	20.2868	229.488	50.0543	23.5377	22.6096	12.2325	13.0852	67.5844	-2.36397	0.00121971	0.0486449	Kif6	17	49615136	49909847	+	6015	protein_coding	kinesin family member 6 [Source:MGI Symbol;Acc:MGI:1098238]	-	-
ENSMUSG00000057789	721.709	689.843	739.158	652.25	640.484	578.19	488.992	523.714	547.545	496.29	688.689	526.946	0.386288	0.00122013	0.0486449	Bak1	17	27019810	27029009	-	2407	protein_coding	BCL2-antagonist/killer 1 [Source:MGI Symbol;Acc:MGI:1097161]	-	-
ENSMUSG00000110706	0	0	0.997514	1.0623	0	4.96727	4.81291	7.84591	7.8642	8.7375	0.411962	6.84556	-4.01947	0.00123776	0.0492627	Gm45709	8	124897894	124900130	-	1075	antisense	predicted gene 45709 [Source:MGI Symbol;Acc:MGI:5804824]	-	-
ENSMUSG00000003282	42.7328	24.0867	22.9428	11.6853	33.8114	66.5614	76.044	55.9021	56.0324	45.435	27.0518	59.995	-1.15264	0.00126965	0.0504451	Plag1	4	3900996	3938423	-	8487	protein_coding	pleiomorphic adenoma gene 1 [Source:MGI Symbol;Acc:MGI:1891916]	C2H2	C2H2
ENSMUSG00000006269	0	3.85387	0	1.0623	16.4227	80.4698	14.4387	20.5955	19.6605	23.5912	4.26777	31.7511	-2.87456	0.00127583	0.0506035	Atp6v1b1	6	83742990	83758855	+	4381	protein_coding	ATPase, H+ transporting, lysosomal V1 subunit B1 [Source:MGI Symbol;Acc:MGI:103285]	-	-
ENSMUSG00000087095	83.0916	84.7852	69.826	83.9214	69.5548	153.985	108.772	184.379	122.878	96.9862	78.2358	133.4	-0.769589	0.00128146	0.0506522	Emx2os	19	59425104	59458635	-	5023	antisense	Emx2 opposite strand/antisense transcript (non-protein coding) [Source:MGI Symbol;Acc:MGI:3052329]	-	-
ENSMUSG00000106445	0	0	3.99006	0	0.966039	43.712	3.85033	39.2295	0	6.11625	0.991219	18.5816	-4.204	0.00128219	0.0506522	Gm21190	5	15524456	15529222	-	1167	protein_coding	predicted gene, 21190 [Source:MGI Symbol;Acc:MGI:5434545]	-	-
ENSMUSG00000038060	30.8626	13.4886	19.9503	30.8066	33.8114	611.968	85.6698	90.2279	41.287	20.0962	25.7839	169.85	-2.72017	0.00128364	0.0506522	Dlec1	9	119102478	119148246	+	6696	protein_coding	deleted in lung and esophageal cancer 1 [Source:MGI Symbol;Acc:MGI:2443671]	-	-
ENSMUSG00000109342	0	0	3.99006	2.12459	1.93208	5.96072	12.5136	17.6533	6.88117	16.6012	1.60935	11.922	-2.87247	0.00128606	0.0506611	Gm32983	7	67593659	67594163	+	505	processed_pseudogene	predicted gene, 32983 [Source:MGI Symbol;Acc:MGI:5592142]	-	-
ENSMUSG00000030309	363.229	407.547	388.033	393.05	411.533	567.262	436.05	736.534	575.069	512.017	392.678	565.387	-0.525278	0.00131317	0.0516409	Caprin2	6	148842492	148896237	-	14140	protein_coding	caprin family member 2 [Source:MGI Symbol;Acc:MGI:2448541]	-	-
ENSMUSG00000037544	219.599	167.643	185.538	258.138	261.797	255.318	362.894	308.933	355.855	424.642	218.543	341.528	-0.645012	0.00132179	0.0518104	Dlgap5	14	47387779	47418407	-	6805	protein_coding	DLG associated protein 5 [Source:MGI Symbol;Acc:MGI:2183453]	-	-
ENSMUSG00000028268	874.835	636.852	1195.02	877.457	625.993	525.537	427.387	644.345	536.731	544.346	842.032	535.669	0.652366	0.00132197	0.0518104	Gbp3	3	142560026	142573209	+	3265	protein_coding	guanylate binding protein 3 [Source:MGI Symbol;Acc:MGI:1926263]	-	-
ENSMUSG00000042707	10.6832	9.63468	30.9229	16.9967	19.3208	729.195	149.2	210.859	1.96605	7.86375	17.5117	219.817	-3.64913	0.00132507	0.0518438	Dnali1	4	125055338	125065703	-	2133	protein_coding	dynein, axonemal, light intermediate polypeptide 1 [Source:MGI Symbol;Acc:MGI:1922813]	-	-
ENSMUSG00000033966	0	3.85387	7.98011	13.8099	3.86416	216.573	47.1665	61.7865	11.7963	3.495	5.9016	68.1635	-3.52695	0.00133088	0.0519833	Cdkl4	17	80523550	80563834	-	2931	protein_coding	cyclin-dependent kinase-like 4 [Source:MGI Symbol;Acc:MGI:3587025]	-	-
ENSMUSG00000105603	0	0	0	0	0	7.94763	1.92516	1.96148	3.9321	11.3587	0	5.42502	-4.83976	0.0013424	0.0522817	Gm32996	5	110480755	110482201	-	1447	processed_pseudogene	predicted gene, 32996 [Source:MGI Symbol;Acc:MGI:5592155]	-	-
ENSMUSG00000028555	32.0496	26.0136	35.9105	50.9902	22.2189	305.984	108.772	71.5939	35.3889	30.5812	33.4366	110.464	-1.72438	0.00134682	0.0522817	Ttc39a	4	109406623	109444745	+	4904	protein_coding	tetratricopeptide repeat domain 39A [Source:MGI Symbol;Acc:MGI:2444350]	-	-
ENSMUSG00000078487	0	0	0	0	0.966039	34.7709	13.4762	8.82664	0	0	0.193208	11.4147	-5.33158	0.00134835	0.0522817	Ankrd65	4	155790439	155799503	+	1322	protein_coding	ankyrin repeat domain 65 [Source:MGI Symbol;Acc:MGI:2685285]	-	-
ENSMUSG00000053141	15.4313	21.1963	48.8782	36.1181	47.3359	156.966	70.2685	131.419	37.3549	56.7937	33.792	90.5604	-1.41809	0.0013488	0.0522817	Ptprt	2	161521990	162661147	-	12611	protein_coding	protein tyrosine phosphatase, receptor type, T [Source:MGI Symbol;Acc:MGI:1321152]	-	-
ENSMUSG00000025202	1.18702	12.5251	10.9727	16.9967	6.76227	53.6465	22.1394	50.9984	31.4568	14.8537	9.68876	34.619	-1.82761	0.00134985	0.0522817	Scd3	19	44203288	44244016	+	3470	protein_coding	stearoyl-coenzyme A desaturase 3 [Source:MGI Symbol;Acc:MGI:1353437]	-	-
ENSMUSG00000026611	0	0.963468	2.99254	6.37378	1.93208	67.5549	15.4013	23.5377	11.7963	0	2.45237	23.658	-3.26431	0.00136644	0.0528358	Spata17	1	187044648	187215465	-	2870	protein_coding	spermatogenesis associated 17 [Source:MGI Symbol;Acc:MGI:1921967]	-	-
ENSMUSG00000035694	10.6832	2.8904	16.9577	22.3082	16.4227	68.5483	60.6427	66.6902	15.7284	22.7175	13.8524	46.8654	-1.75838	0.00140019	0.05405	Caps2	10	112163621	112216555	+	3422	protein_coding	calcyphosphine 2 [Source:MGI Symbol;Acc:MGI:2441980]	-	-
ENSMUSG00000115737	17.8053	22.1598	12.9677	18.059	28.9812	35.7643	64.493	50.0176	24.5756	64.6575	19.9946	47.9016	-1.25898	0.00140439	0.0541216	Rpl19-ps3	14	49103507	49122712	-	2871	transcribed_processed_pseudogene	ribosomal protein L19, pseudogene 3 [Source:MGI Symbol;Acc:MGI:3648038]	-	-
ENSMUSG00000056014	340.675	232.196	242.396	230.518	236.68	414.27	379.257	322.663	359.787	377.46	256.493	370.687	-0.533299	0.0014152	0.0544473	A430033K04Rik	5	138622859	138652414	+	4097	protein_coding	RIKEN cDNA A430033K04 gene [Source:MGI Symbol;Acc:MGI:3583896]	C2H2	C2H2
ENSMUSG00000058290	201.794	183.059	158.605	277.259	300.438	348.702	418.723	267.742	354.872	457.845	224.231	369.577	-0.721097	0.00143902	0.0552718	Espl1	15	102296266	102324357	+	8749	protein_coding	extra spindle pole bodies 1, separase [Source:MGI Symbol;Acc:MGI:2146156]	-	-
ENSMUSG00000091650	7.12213	14.452	61.8459	78.6099	5.79623	7.94763	10.5884	5.88443	5.89815	2.62125	33.5652	6.58797	2.35278	0.00145159	0.0556313	Apol11a	15	77508271	77518051	+	1864	protein_coding	apolipoprotein L 11a [Source:MGI Symbol;Acc:MGI:3649094]	-	-
ENSMUSG00000023013	109.206	50.1003	26.9329	9.56067	41.5397	8.94108	18.2891	11.7689	12.7793	18.3487	47.4679	14.0254	1.75311	0.0014532	0.0556313	Aqp2	15	99579055	99584547	+	1419	protein_coding	aquaporin 2 [Source:MGI Symbol;Acc:MGI:1096865]	-	-
ENSMUSG00000027506	1185.84	1167.72	1450.39	1214.2	1087.76	2477.67	1463.13	2014.44	1457.83	1628.67	1221.18	1808.35	-0.56631	0.00145742	0.0556762	Tpd52	3	8925593	9004723	-	7487	protein_coding	tumor protein D52 [Source:MGI Symbol;Acc:MGI:107749]	-	-
ENSMUSG00000053111	28.4885	14.452	10.9727	21.2459	19.3208	184.782	53.9046	59.825	27.5247	13.1062	18.896	67.8286	-1.84657	0.0014592	0.0556762	Fank1	7	133776861	133881532	+	2299	protein_coding	fibronectin type 3 and ankyrin repeat domains 1 [Source:MGI Symbol;Acc:MGI:1914180]	-	-
ENSMUSG00000036528	446.32	395.985	408.981	374.991	430.853	662.634	502.468	563.924	517.071	533.861	411.426	555.992	-0.43454	0.0014641	0.055771	Ppfibp2	7	107595207	107748583	+	10553	protein_coding	PTPRF interacting protein, binding protein 2 (liprin beta 2) [Source:MGI Symbol;Acc:MGI:894649]	-	-
ENSMUSG00000039963	4.74809	22.1598	71.821	25.4951	11.5925	1295.46	106.847	212.82	7.8642	48.0562	27.1633	334.21	-3.62003	0.00146775	0.0558182	Ccdc40	11	119228572	119265236	+	6031	protein_coding	coiled-coil domain containing 40 [Source:MGI Symbol;Acc:MGI:2443893]	-	-
ENSMUSG00000037936	12954	22624.2	20637.6	27398.7	17067	13866.6	13841	6447.37	14615.6	9816.58	20136.3	11717.4	0.781156	0.00147112	0.0558541	Scarb1	5	125277087	125341094	-	8500	protein_coding	scavenger receptor class B, member 1 [Source:MGI Symbol;Acc:MGI:893578]	-	-
ENSMUSG00000109564	790.557	550.14	892.775	684.119	474.325	443.08	432.199	429.563	446.293	188.73	678.383	387.973	0.806406	0.00148086	0.0560906	Muc16	9	18495455	18674530	-	26350	protein_coding	mucin 16 [Source:MGI Symbol;Acc:MGI:1920982]	-	-
ENSMUSG00000085427	0	0	0	0	2.89812	9.93454	5.77549	11.7689	7.8642	7.86375	0.579623	8.64137	-3.83537	0.0014838	0.0560906	6430710C18Rik	2	72745846	72813717	-	2270	lincRNA	RIKEN cDNA 6430710C18 gene [Source:MGI Symbol;Acc:MGI:1923468]	-	-
ENSMUSG00000063681	9.49618	14.452	7.98011	27.6197	50.234	53.6465	76.044	70.6132	42.2701	68.1525	21.9564	62.1452	-1.49583	0.00148464	0.0560906	Crb1	1	139197056	139377100	-	14432	protein_coding	crumbs family member 1, photoreceptor morphogenesis associated [Source:MGI Symbol;Acc:MGI:2136343]	-	-
ENSMUSG00000071550	20.1794	22.1598	44.8881	9.56067	25.117	692.437	145.35	189.282	15.7284	10.485	24.381	210.657	-3.1102	0.0014932	0.056322	Cfap44	16	44394796	44482428	+	8405	protein_coding	cilia and flagella associated protein 44 [Source:MGI Symbol;Acc:MGI:1277238]	-	-
ENSMUSG00000076617	197.046	105.018	235.413	308.066	144.906	2195.53	1701.85	402.103	218.231	216.69	198.09	946.88	-2.25713	0.00149741	0.0563886	Ighm	12	113418558	113422730	-	1886	IG_C_gene	immunoglobulin heavy constant mu [Source:MGI Symbol;Acc:MGI:96448]	-	-
ENSMUSG00000015879	0	0.963468	0.997514	4.24919	0	30.7971	10.5884	12.7496	2.94907	5.2425	1.24203	12.4653	-3.3277	0.0015115	0.0568266	Fam184b	5	45529705	45639614	-	8598	protein_coding	family with sequence similarity 184, member B [Source:MGI Symbol;Acc:MGI:2442958]	-	-
ENSMUSG00000036699	3.56107	7.70774	5.98509	5.31148	12.5585	105.306	23.102	14.7111	10.8133	12.2325	7.02478	33.233	-2.23203	0.00152274	0.0571558	Zcchc12	X	36195904	36199158	+	2280	protein_coding	zinc finger, CCHC domain containing 12 [Source:MGI Symbol;Acc:MGI:1919943]	-	-
ENSMUSG00000020847	270.641	256.282	247.384	275.135	381.585	399.368	375.407	451.14	381.414	477.941	286.205	417.054	-0.542922	0.001527	0.0572228	Rph3al	11	75830999	75938429	-	3814	protein_coding	rabphilin 3A-like (without C2 domains) [Source:MGI Symbol;Acc:MGI:1923492]	-	-
ENSMUSG00000052221	10.6832	15.4155	19.9503	6.37378	5.79623	181.802	64.493	49.0369	20.6435	0.87375	11.6438	63.3698	-2.44206	0.00153026	0.0572522	Ppp1r36	12	76417538	76439492	+	3347	protein_coding	protein phosphatase 1, regulatory subunit 36 [Source:MGI Symbol;Acc:MGI:2684916]	-	-
ENSMUSG00000075611	3.56107	2.8904	31.9205	6.37378	12.5585	40.7316	43.3162	39.2295	42.2701	34.0762	11.4608	39.9247	-1.79229	0.00154055	0.0575439	Gm11545	11	94756976	94757763	-	375	unprocessed_pseudogene	predicted gene 11545 [Source:MGI Symbol;Acc:MGI:2144683]	-	-
ENSMUSG00000037395	287.259	321.798	266.336	292.131	312.031	360.624	396.584	412.891	402.057	398.43	295.911	394.117	-0.413032	0.00154326	0.0575518	Rcor3	1	192098546	192138062	-	13622	protein_coding	REST corepressor 3 [Source:MGI Symbol;Acc:MGI:2441920]	-	-
ENSMUSG00000068246	144.817	95.3833	118.704	96.669	68.5888	54.64	36.5781	69.6324	70.7778	48.0562	104.832	55.9369	0.90497	0.00155578	0.0579251	Apol9b	15	77729039	77736382	+	1821	protein_coding	apolipoprotein L 9b [Source:MGI Symbol;Acc:MGI:1919148]	-	-
ENSMUSG00000097040	0	0.963468	0	2.12459	0.966039	5.96072	13.4762	8.82664	13.7623	2.62125	0.81082	8.92942	-3.44387	0.00160021	0.0594834	2610316D01Rik	3	45280437	45378260	-	1209	processed_transcript	RIKEN cDNA 2610316D01 gene [Source:MGI Symbol;Acc:MGI:1919761]	-	-
ENSMUSG00000036834	39.1717	33.7214	75.8111	26.5574	64.7246	389.434	98.1834	150.053	48.1682	51.5512	47.9972	147.478	-1.61768	0.00160728	0.0596504	Plch1	3	63696234	63899472	-	8637	protein_coding	phospholipase C, eta 1 [Source:MGI Symbol;Acc:MGI:2683547]	-	-
ENSMUSG00000028642	7.12213	1.92694	6.9826	9.56067	3.86416	142.064	4.81291	51.9791	8.84722	1.7475	5.8913	41.8901	-2.83416	0.00161988	0.060018	Tmem269	4	119205055	119218217	-	1504	protein_coding	transmembrane protein 269 [Source:MGI Symbol;Acc:MGI:1922430]	-	-
ENSMUSG00000028626	46.2939	81.8948	98.7539	172.092	295.608	214.586	411.023	348.162	254.603	404.546	138.928	326.584	-1.23181	0.00162439	0.060018	Col9a2	4	121039385	121055322	+	3095	protein_coding	collagen, type IX, alpha 2 [Source:MGI Symbol;Acc:MGI:88466]	-	-
novel.755	0	0	0	0	0	0	2.88775	15.6918	5.89815	8.7375	0	6.64304	-5.12974	0.00162499	0.060018	-	4	40013370	40013884	-	515	-	- && - && -	-	-
ENSMUSG00000078161	0	1.92694	10.9727	0	0.966039	472.884	87.595	83.3627	0	6.99	2.77313	130.166	-5.54675	0.00163874	0.0604292	Erich3	3	154663859	154767790	+	8963	protein_coding	glutamate rich 3 [Source:MGI Symbol;Acc:MGI:1919095]	-	-
ENSMUSG00000037143	7.12213	0.963468	30.9229	16.9967	11.5925	428.179	78.9318	94.1509	29.4907	7.86375	13.5196	127.723	-3.23906	0.00164551	0.0605819	Cfap61	2	145934784	146215039	+	10606	protein_coding	cilia and flagella associated protein 61 [Source:MGI Symbol;Acc:MGI:1926024]	-	-
ENSMUSG00000099207	2.37404	0.963468	0	1.0623	0	3.97382	12.5136	12.7496	3.9321	11.3587	0.879962	8.90556	-3.40214	0.00164888	0.0606096	Gm10637	8	87169747	87199850	-	3612	lincRNA	predicted gene 10637 [Source:MGI Symbol;Acc:MGI:3641741]	-	-
ENSMUSG00000041809	86.6526	93.4564	95.7614	67.987	79.2152	483.812	152.088	168.687	109.116	89.1224	84.6145	200.565	-1.24429	0.00166007	0.0609238	Efhc1	1	20951626	20990841	+	2208	protein_coding	EF-hand domain (C-terminal) containing 1 [Source:MGI Symbol;Acc:MGI:1919127]	-	-
ENSMUSG00000059921	35.6107	57.8081	26.9329	48.8656	29.9472	73.5156	110.697	84.3435	52.1003	76.89	39.8329	79.5093	-0.996614	0.00166656	0.0610649	Unc5c	3	141465216	141834924	+	19135	protein_coding	unc-5 netrin receptor C [Source:MGI Symbol;Acc:MGI:1095412]	-	-
ENSMUSG00000068113	0	0	0	0	0	3.97382	4.81291	7.84591	5.89815	1.7475	0	4.85566	-4.67458	0.00167722	0.0613579	Gm4907	X	23882553	23907607	+	1493	protein_coding	predicted gene 4907 [Source:MGI Symbol;Acc:MGI:3648288]	LIM	LIM
ENSMUSG00000074625	0	0.963468	3.99006	0	0.966039	39.7382	0.962582	41.191	12.7793	0	1.18391	18.9342	-3.97403	0.0016818	0.0614282	Arhgap40	2	158512796	158550762	+	2206	protein_coding	Rho GTPase activating protein 40 [Source:MGI Symbol;Acc:MGI:3649852]	-	-
ENSMUSG00000048148	0	19.2694	32.918	12.7476	7.72831	667.601	63.5304	115.727	17.6944	29.7075	14.5326	178.852	-3.61891	0.0016976	0.0618788	Nwd1	8	72646711	72717876	+	12067	protein_coding	NACHT and WD repeat domain containing 1 [Source:MGI Symbol;Acc:MGI:2442268]	-	-
ENSMUSG00000041870	2841.73	2373.99	2805.01	2310.49	2797.65	2244.21	1931.9	1994.82	1964.08	2048.94	2625.77	2036.79	0.366396	0.0016995	0.0618788	Ankrd13a	5	114774677	114806200	+	5983	protein_coding	ankyrin repeat domain 13a [Source:MGI Symbol;Acc:MGI:1915670]	-	-
ENSMUSG00000037989	100.897	133.922	234.416	168.905	77.2831	643.758	215.618	329.528	206.435	194.846	143.085	318.037	-1.15166	0.0017299	0.0628793	Wnk2	13	49036303	49148014	-	8481	protein_coding	WNK lysine deficient protein kinase 2 [Source:MGI Symbol;Acc:MGI:1922857]	-	-
ENSMUSG00000110640	0	0	0.997514	0	0	7.94763	0.962582	9.80738	4.91512	6.11625	0.199503	5.94979	-4.39243	0.00173242	0.0628793	Gm45903	8	75201439	75210042	+	2898	lincRNA	predicted gene 45903 [Source:MGI Symbol;Acc:MGI:5805018]	-	-
ENSMUSG00000112544	11.8702	0.963468	16.9577	5.31148	17.3887	0	0.962582	2.94221	0	0	10.4983	0.780959	3.76369	0.00173984	0.0630494	Gm48089	10	99267896	99279084	+	939	lincRNA	predicted gene, 48089 [Source:MGI Symbol;Acc:MGI:6097430]	-	-
ENSMUSG00000020679	0	2.8904	4.98757	0	0	100.339	21.1768	81.4013	0.983025	3.495	1.5756	41.479	-4.70332	0.0017428	0.0630576	Hnf1b	11	83850063	83905819	+	3198	protein_coding	HNF1 homeobox B [Source:MGI Symbol;Acc:MGI:98505]	HB-other	HB->HB-other
ENSMUSG00000070306	0	22.1598	44.8881	7.43607	6.76227	1011.34	232.945	246.165	11.7963	6.11625	16.2493	301.672	-4.21272	0.00175517	0.0634058	Ccdc153	9	44240676	44247306	+	2036	protein_coding	coiled-coil domain containing 153 [Source:MGI Symbol;Acc:MGI:2448587]	-	-
ENSMUSG00000026018	13.0572	10.5981	13.9652	10.623	39.6076	27.8167	41.391	120.631	47.1852	34.95	17.5702	54.3947	-1.62497	0.00175823	0.0634173	Ica1l	1	59982490	60043184	-	5356	protein_coding	islet cell autoantigen 1-like [Source:MGI Symbol;Acc:MGI:1917625]	-	-
ENSMUSG00000021892	1378.13	1668.73	1398.51	1452.16	1460.65	955.703	1145.47	1052.33	1138.34	1292.28	1471.64	1116.83	0.39794	0.00177302	0.0638507	Sh3bp5	14	31359880	31436078	-	3194	protein_coding	SH3-domain binding protein 5 (BTK-associated) [Source:MGI Symbol;Acc:MGI:1344391]	-	-
novel.95	0	0	0	2.12459	0	37.7512	13.4762	20.5955	0	0	0.424919	14.3646	-5.08634	0.00177863	0.0639532	-	10	22570796	22592923	-	809	-	- && - && -	-	-
novel.665	0	0	0.997514	0	0	17.8822	0	11.7689	0.983025	10.485	0.199503	8.22381	-4.8599	0.00179582	0.0644709	-	3	58922462	58943801	+	522	-	- && - && -	-	-
ENSMUSG00000056267	193.485	287.113	255.364	332.499	319.759	313.931	482.254	493.311	472.835	381.829	277.644	428.832	-0.626027	0.00180156	0.0645762	Cep70	9	99243367	99300404	+	4806	protein_coding	centrosomal protein 70 [Source:MGI Symbol;Acc:MGI:1915371]	-	-
ENSMUSG00000020357	947.244	527.017	606.489	530.086	527.457	440.1	404.285	395.238	318.5	463.087	627.658	404.242	0.633643	0.00181253	0.0647703	Flt4	11	49609263	49652739	+	8232	protein_coding	FMS-like tyrosine kinase 4 [Source:MGI Symbol;Acc:MGI:95561]	-	-
ENSMUSG00000002688	156.687	157.045	150.625	162.531	206.732	216.573	351.343	342.278	167.114	304.065	166.724	276.274	-0.728475	0.00181258	0.0647703	Prkd1	12	50341231	50649098	-	3653	protein_coding	protein kinase D1 [Source:MGI Symbol;Acc:MGI:99879]	-	-
ENSMUSG00000012443	622	563.629	503.745	625.693	565.133	639.784	863.436	684.555	900.45	996.074	576.04	816.86	-0.504574	0.00181888	0.0648367	Kif11	19	37376403	37421859	+	4819	protein_coding	kinesin family member 11 [Source:MGI Symbol;Acc:MGI:1098231]	-	-
ENSMUSG00000072437	28.4885	19.2694	27.9304	33.9935	32.8453	60.6007	73.1563	89.2472	44.2361	34.95	28.5054	60.438	-1.08399	0.00182032	0.0648367	Nanos1	19	60755987	60759913	+	3927	protein_coding	nanos C2HC-type zinc finger 1 [Source:MGI Symbol;Acc:MGI:2669254]	-	-
ENSMUSG00000000365	52.229	44.3195	40.8981	29.7443	48.3019	66.5614	77.0066	65.7095	73.7268	98.7337	43.0986	76.3476	-0.827584	0.00182286	0.0648367	Rnf17	14	56402581	56525032	+	6241	protein_coding	ring finger protein 17 [Source:MGI Symbol;Acc:MGI:1353419]	-	-
ENSMUSG00000017754	356.107	527.98	459.854	580.014	576.725	1263.67	877.875	745.361	504.292	764.531	500.136	831.146	-0.732274	0.00183392	0.0650789	Pltp	2	164839518	164857711	-	2562	protein_coding	phospholipid transfer protein [Source:MGI Symbol;Acc:MGI:103151]	-	-
ENSMUSG00000042189	0	0.963468	0.997514	1.0623	0	45.6989	8.66324	19.6148	0	0	0.604656	14.7954	-4.59514	0.00183531	0.0650789	Tekt3	11	63061654	63094964	+	1748	protein_coding	tektin 3 [Source:MGI Symbol;Acc:MGI:1918312]	-	-
ENSMUSG00000009092	258.771	247.611	281.299	471.66	537.118	554.347	620.866	673.767	504.292	645.701	359.292	599.794	-0.738945	0.00184398	0.0652859	Derl3	10	75893413	75895941	+	1993	protein_coding	Der1-like domain family, member 3 [Source:MGI Symbol;Acc:MGI:1917627]	-	-
ENSMUSG00000053070	140.069	137.776	105.737	94.5444	85.0114	259.291	146.313	230.473	153.352	165.139	112.627	190.914	-0.762089	0.0018493	0.0653742	Cfap300	9	8021672	8042823	-	1592	protein_coding	cilia and flagella associated protein 300 [Source:MGI Symbol;Acc:MGI:3045346]	-	-
ENSMUSG00000038379	206.542	88.6391	105.737	206.085	169.057	251.344	285.887	233.416	258.535	304.939	155.212	266.824	-0.784183	0.00185563	0.0654976	Ttk	9	83834689	83872389	+	4919	protein_coding	Ttk protein kinase [Source:MGI Symbol;Acc:MGI:1194921]	-	-
ENSMUSG00000064280	0	1.92694	41.8956	5.31148	5.79623	677.535	88.5576	157.899	19.6605	10.485	10.986	190.827	-4.11624	0.00190267	0.0670555	Ccdc146	5	21292961	21424677	-	4371	protein_coding	coiled-coil domain containing 146 [Source:MGI Symbol;Acc:MGI:1922422]	-	-
ENSMUSG00000026622	183.988	136.812	137.657	190.151	172.921	318.899	251.234	186.34	250.671	249.019	164.306	251.233	-0.613867	0.00191209	0.0672844	Nek2	1	191821444	191833050	+	4516	protein_coding	NIMA (never in mitosis gene a)-related expressed kinase 2 [Source:MGI Symbol;Acc:MGI:109359]	-	-
ENSMUSG00000056821	0	0	0	0	0	6.95418	4.81291	4.90369	0.983025	6.99	0	4.92876	-4.69973	0.00191754	0.0673737	1700028I16Rik	10	82812123	82824242	+	1056	lincRNA	RIKEN cDNA 1700028I16 gene [Source:MGI Symbol;Acc:MGI:1917253]	-	-
ENSMUSG00000056162	2.37404	0	18.9528	3.18689	11.5925	128.156	11.551	56.8828	6.88117	25.3387	7.22123	45.7619	-2.65705	0.00193801	0.0679894	Cndp1	18	84610509	84650084	-	5555	protein_coding	carnosine dipeptidase 1 (metallopeptidase M20 family) [Source:MGI Symbol;Acc:MGI:2451097]	-	-
ENSMUSG00000005800	0	8.67121	11.9702	3.18689	8.69435	328.833	25.0271	103.958	7.8642	2.62125	6.50452	93.6608	-3.84209	0.00194358	0.0680812	Mmp8	9	7558456	7568485	+	2425	protein_coding	matrix metallopeptidase 8 [Source:MGI Symbol;Acc:MGI:1202395]	-	-
ENSMUSG00000032323	69999.9	126253	98994.3	111825	90810.6	58912.8	75637.8	54713.4	77193	72776.3	99576.5	67846.7	0.553529	0.00194735	0.0681099	Cyp11a1	9	58006411	58027023	+	4804	protein_coding	cytochrome P450, family 11, subfamily a, polypeptide 1 [Source:MGI Symbol;Acc:MGI:88582]	-	-
ENSMUSG00000105643	21.3664	3.85387	0	7.43607	3.86416	0.993454	0	0	0	0	7.3041	0.198691	4.78862	0.00195919	0.0684206	Gm42611	3	157980248	157983654	+	3407	TEC	predicted gene 42611 [Source:MGI Symbol;Acc:MGI:5662748]	-	-
ENSMUSG00000046168	13.0572	11.5616	23.9403	21.2459	27.0491	300.023	51.0169	62.7672	15.7284	7.86375	19.3708	87.4799	-2.17299	0.00197885	0.0690025	Kcnrg	14	61607457	61612826	+	1825	protein_coding	potassium channel regulator [Source:MGI Symbol;Acc:MGI:2685591]	-	-
ENSMUSG00000074649	664.732	575.19	634.419	469.535	361.299	459.969	330.166	281.472	357.821	293.58	541.035	344.601	0.650687	0.00199673	0.0695211	BC029722	2	155817730	155819426	-	1615	protein_coding	cDNA sequence BC029722 [Source:MGI Symbol;Acc:MGI:3584273]	-	-
ENSMUSG00000115390	0	0	1.99503	2.12459	0	1.98691	7.70066	9.80738	13.7623	13.1062	0.823924	9.27271	-3.49313	0.00200322	0.0696421	Gm49035	14	121507013	121519130	-	1336	lincRNA	predicted gene, 49035 [Source:MGI Symbol;Acc:MGI:6118407]	-	-
ENSMUSG00000026253	0	0	0	0	0	15.8953	2.88775	4.90369	8.84722	0	0	6.50678	-5.09655	0.00201015	0.0697781	Chrng	1	87204657	87212694	+	4163	protein_coding	cholinergic receptor, nicotinic, gamma polypeptide [Source:MGI Symbol;Acc:MGI:87895]	-	-
ENSMUSG00000059108	0	8.67121	11.9702	16.9967	6.76227	15.8953	51.9794	62.7672	18.6775	25.3387	8.88008	34.9316	-1.96855	0.00201469	0.0698304	Ifitm6	7	141015699	141017924	-	905	protein_coding	interferon induced transmembrane protein 6 [Source:MGI Symbol;Acc:MGI:2686976]	-	-
ENSMUSG00000018581	23.7404	4.81734	29.9254	9.56067	19.3208	418.244	98.1834	75.5168	12.7793	18.3487	17.4729	124.614	-2.83494	0.00202307	0.0700159	Dnah11	12	117877982	118199043	-	14458	protein_coding	dynein, axonemal, heavy chain 11 [Source:MGI Symbol;Acc:MGI:1100864]	-	-
ENSMUSG00000081769	188.737	131.995	141.647	132.787	108.196	42.7185	84.7072	81.4013	112.065	71.6475	140.672	78.5079	0.839902	0.00204976	0.0708333	Gm12216	11	53783418	53859256	-	2647	protein_coding	predicted gene 12216 [Source:MGI Symbol;Acc:MGI:3650088]	-	-
ENSMUSG00000034035	81.9045	75.1505	76.8086	97.7313	99.502	329.827	173.265	203.994	95.3534	87.375	86.2194	177.963	-1.04469	0.00212186	0.0732153	Ccdc17	4	116596654	116600266	+	2634	protein_coding	coiled-coil domain containing 17 [Source:MGI Symbol;Acc:MGI:1915667]	C2H2	C2H2
ENSMUSG00000027306	532.973	377.679	365.09	434.479	403.804	398.375	719.049	596.289	749.065	848.411	422.805	662.238	-0.648363	0.00213321	0.0734971	Nusap1	2	119618298	119651244	+	4059	protein_coding	nucleolar and spindle associated protein 1 [Source:MGI Symbol;Acc:MGI:2675669]	-	-
ENSMUSG00000106718	0	0	0	3.18689	0	10.928	3.85033	18.634	6.88117	5.2425	0.637378	9.1072	-3.86169	0.00213697	0.0735169	Gm20052	5	37893772	37897917	+	1850	lincRNA	predicted gene, 20052 [Source:MGI Symbol;Acc:MGI:5012237]	-	-
ENSMUSG00000096141	11.8702	6.74428	8.97763	5.31148	4.83019	115.241	14.4387	31.3836	9.83025	6.99	7.54676	35.5766	-2.24094	0.00214065	0.073534	Dnah7a	1	53397006	53706784	-	12767	protein_coding	dynein, axonemal, heavy chain 7A [Source:MGI Symbol;Acc:MGI:2685838]	-	-
ENSMUSG00000015966	13.0572	12.5251	38.9031	13.8099	26.0831	78.4828	61.6053	81.4013	16.7114	50.6775	20.8757	57.7757	-1.46428	0.00214424	0.0735385	Il17rb	14	29996135	30008896	-	3707	protein_coding	interleukin 17 receptor B [Source:MGI Symbol;Acc:MGI:1355292]	-	-
ENSMUSG00000026430	231.469	202.328	294.267	227.331	213.495	474.871	339.792	635.518	285.077	263.872	233.778	399.826	-0.7739	0.00214985	0.0735385	Rassf5	1	131176410	131245258	-	3997	protein_coding	Ras association (RalGDS/AF-6) domain family member 5 [Source:MGI Symbol;Acc:MGI:1926375]	-	-
ENSMUSG00000021770	1517.01	1425.93	1469.34	1536.08	1259.71	1342.16	1040.55	1014.08	1045.94	987.337	1441.62	1086.01	0.408638	0.00215034	0.0735385	Samd8	14	21750531	21798726	+	7639	protein_coding	sterile alpha motif domain containing 8 [Source:MGI Symbol;Acc:MGI:1914880]	-	-
ENSMUSG00000051951	24.9275	24.0867	28.9279	9.56067	5.79623	6.95418	4.81291	2.94221	2.94907	6.11625	18.6598	4.75492	1.96801	0.00216185	0.0737327	Xkr4	1	3205901	3671498	-	6094	protein_coding	X-linked Kx blood group related 4 [Source:MGI Symbol;Acc:MGI:3528744]	-	-
ENSMUSG00000111194	5.93511	0	0.997514	12.7476	14.4906	31.7905	33.6904	45.114	15.7284	25.3387	6.83415	30.3324	-2.15174	0.00216241	0.0737327	Gm47180	9	124338979	124347160	+	1100	transcribed_unprocessed_pseudogene	predicted gene, 47180 [Source:MGI Symbol;Acc:MGI:6095967]	-	-
ENSMUSG00000034706	41.5458	22.1598	28.9279	13.8099	29.9472	790.789	145.35	141.226	46.2022	3.495	27.2781	225.413	-3.04721	0.00218201	0.0741841	Dnaic2	11	114727408	114757889	+	4568	protein_coding	dynein, axonemal, intermediate chain 2 [Source:MGI Symbol;Acc:MGI:2685574]	-	-
ENSMUSG00000048349	14.2443	9.63468	19.9503	8.49837	21.2529	31.7905	30.8026	55.9021	24.5756	38.445	14.7161	36.3032	-1.30002	0.00218258	0.0741841	Pou4f1	14	104461676	104467999	-	4672	protein_coding	POU domain, class 4, transcription factor 1 [Source:MGI Symbol;Acc:MGI:102525]	HB-other	HB->HB-other
ENSMUSG00000023403	2.37404	1.92694	1.99503	12.7476	4.83019	8.94108	15.4013	13.7303	26.5417	40.1925	4.77475	20.9614	-2.14034	0.0021872	0.0741841	Stk31	6	49395604	49469501	+	3237	protein_coding	serine threonine kinase 31 [Source:MGI Symbol;Acc:MGI:1924735]	-	-
ENSMUSG00000043088	14.2443	12.5251	27.9304	35.0558	31.8793	193.723	49.0917	103.958	22.6096	27.0862	24.327	79.2938	-1.70239	0.0021885	0.0741841	Il17re	6	113458484	113470758	+	5868	protein_coding	interleukin 17 receptor E [Source:MGI Symbol;Acc:MGI:1889371]	-	-
ENSMUSG00000039099	17.8053	19.2694	18.9528	19.1213	17.3887	164.913	43.3162	45.114	18.6775	22.7175	18.5075	58.9477	-1.66981	0.00221258	0.0748904	Wdr93	7	79743163	79785950	+	2285	protein_coding	WD repeat domain 93 [Source:MGI Symbol;Acc:MGI:3646885]	-	-
ENSMUSG00000026610	41.5458	11.5616	39.9006	15.9344	25.117	132.129	59.6801	46.0947	38.338	68.1525	26.8119	68.8789	-1.36513	0.00222112	0.0749257	Esrrg	1	187608791	188214885	+	6208	protein_coding	estrogen-related receptor gamma [Source:MGI Symbol;Acc:MGI:1347056]	-	-
ENSMUSG00000024347	0	0.963468	3.99006	1.0623	3.86416	22.8494	10.5884	4.90369	3.9321	26.2125	1.976	13.6972	-2.76926	0.00222151	0.0749257	Psd2	18	35964830	36014715	+	4785	protein_coding	pleckstrin and Sec7 domain containing 2 [Source:MGI Symbol;Acc:MGI:1921252]	-	-
ENSMUSG00000026972	202.981	320.835	298.257	410.046	348.74	520.57	419.686	525.676	485.614	431.632	316.172	476.636	-0.590954	0.00222336	0.0749257	Arrdc1	2	24925352	24935252	-	2510	protein_coding	arrestin domain containing 1 [Source:MGI Symbol;Acc:MGI:2446136]	-	-
ENSMUSG00000046242	0	2.8904	8.97763	3.18689	1.93208	292.075	51.9794	72.5746	0	1.7475	3.3974	83.6754	-4.61705	0.00223032	0.0750506	Nme9	9	99451475	99474751	+	1662	protein_coding	NME/NM23 family member 9 [Source:MGI Symbol;Acc:MGI:4359686]	-	-
ENSMUSG00000116546	0	1.92694	0	1.0623	0	0	13.4762	15.6918	15.7284	6.11625	0.597846	10.2025	-4.06451	0.00223548	0.0751147	AC163720.1	16	30849456	30851358	+	1214	lincRNA	novel transcript	-	-
ENSMUSG00000028730	40.3588	13.4886	38.9031	12.7476	13.5245	598.059	80.8569	126.515	16.7114	23.5912	23.8045	169.147	-2.83025	0.00224478	0.0753177	Cfap57	4	118554551	118620777	-	4020	protein_coding	cilia and flagella associated protein 57 [Source:MGI Symbol;Acc:MGI:2686209]	-	-
ENSMUSG00000040563	537.721	474.026	459.854	385.614	390.28	226.507	252.197	299.125	413.853	296.201	449.499	297.577	0.594651	0.00225135	0.0754284	Plppr2	9	21937033	21948907	+	2750	protein_coding	phospholipid phosphatase related 2 [Source:MGI Symbol;Acc:MGI:2384575]	-	-
ENSMUSG00000021194	5.93511	0	0	0	2.89812	11.9214	20.2142	14.7111	5.89815	12.2325	1.76665	12.9955	-2.92609	0.00227771	0.0759831	Chga	12	102554969	102565028	+	2756	protein_coding	chromogranin A [Source:MGI Symbol;Acc:MGI:88394]	-	-
ENSMUSG00000061126	0	2.8904	6.9826	7.43607	1.93208	11.9214	11.551	16.6725	21.6265	20.97	3.84823	16.5483	-2.09483	0.00228853	0.0759831	Cyp4f39	17	32468462	32492479	+	1599	protein_coding	cytochrome P450, family 4, subfamily f, polypeptide 39 [Source:MGI Symbol;Acc:MGI:2445210]	-	-
ENSMUSG00000030168	4481.01	3333.6	3429.45	3143.33	3803.3	2986.32	2246.67	2422.42	2785.89	2925.31	3638.14	2673.32	0.444429	0.00228954	0.0759831	Adipor2	6	119353150	119417704	-	5979	protein_coding	adiponectin receptor 2 [Source:MGI Symbol;Acc:MGI:93830]	-	-
ENSMUSG00000006345	0	6.74428	1.99503	5.31148	1.93208	99.3454	16.3639	15.6918	0	9.61124	3.19657	28.2025	-3.1296	0.00229241	0.0759831	Ggt1	10	75561604	75586200	+	3411	protein_coding	gamma-glutamyltransferase 1 [Source:MGI Symbol;Acc:MGI:95706]	-	-
ENSMUSG00000050994	0	14.452	17.9553	3.18689	7.72831	584.151	89.5202	93.1701	1.96605	5.2425	8.6645	154.81	-4.1555	0.00229268	0.0759831	Adgb	10	10335703	10472326	-	6192	protein_coding	androglobin [Source:MGI Symbol;Acc:MGI:3605549]	-	-
ENSMUSG00000046295	28.4885	16.379	21.9453	37.1804	61.8265	32.784	88.5576	71.5939	134.674	81.2587	33.1639	81.7737	-1.30105	0.00229601	0.0759831	Ankle1	8	71406010	71409904	+	2558	protein_coding	ankyrin repeat and LEM domain containing 1 [Source:MGI Symbol;Acc:MGI:1918775]	-	-
ENSMUSG00000034450	104.458	67.4428	92.7688	106.23	94.6718	636.804	136.687	189.282	104.201	107.471	93.1142	234.889	-1.33498	0.00229606	0.0759831	Gulo	14	65986786	66009207	-	2263	protein_coding	gulonolactone (L-) oxidase [Source:MGI Symbol;Acc:MGI:1353434]	-	-
ENSMUSG00000028434	246.901	341.068	351.125	383.489	271.457	922.919	492.842	521.753	314.568	498.037	318.808	550.024	-0.786373	0.00229826	0.0759831	Epb41l4b	4	56991972	57143437	-	8858	protein_coding	erythrocyte membrane protein band 4.1 like 4b [Source:MGI Symbol;Acc:MGI:1859149]	-	-
ENSMUSG00000110841	675.416	705.259	731.178	761.666	522.627	545.406	492.842	412.891	521.986	491.047	679.229	492.834	0.462636	0.00229996	0.0759831	Gpx4-ps2	10	45875291	45876086	+	796	transcribed_processed_pseudogene	glutathione peroxidase 4, pseudogene 2 [Source:MGI Symbol;Acc:MGI:3779731]	-	-
ENSMUSG00000027330	329.992	237.013	294.267	209.272	286.914	353.67	328.241	442.313	420.735	425.516	271.492	394.095	-0.538551	0.00230082	0.0759831	Cdc25b	2	131186949	131198497	+	3728	protein_coding	cell division cycle 25B [Source:MGI Symbol;Acc:MGI:99701]	-	-
ENSMUSG00000079009	0	0	0	2.12459	2.89812	14.9018	9.62582	3.92295	10.8133	7.86375	1.00454	9.42552	-3.20835	0.0023112	0.0762167	Gm14139	2	150181755	150193279	+	1728	protein_coding	predicted gene 14139 [Source:MGI Symbol;Acc:MGI:3836251]	C2H2	C2H2
ENSMUSG00000027068	16.6183	7.70774	21.9453	23.3705	20.2868	717.274	57.7549	86.305	4.91512	14.8537	17.9857	176.22	-3.29251	0.00231812	0.0763358	Dhrs9	2	69380445	69404533	+	4281	protein_coding	dehydrogenase/reductase (SDR family) member 9 [Source:MGI Symbol;Acc:MGI:2442798]	-	-
ENSMUSG00000026721	865.339	820.875	884.795	958.191	875.231	1592.51	1020.34	1438.74	1119.66	1025.78	880.886	1239.41	-0.492486	0.00232974	0.0766093	Rabgap1l	1	160219174	160793211	-	23232	protein_coding	RAB GTPase activating protein 1-like [Source:MGI Symbol;Acc:MGI:1352507]	-	-
ENSMUSG00000021999	0	1.92694	1.99503	0	0	0.993454	15.4013	10.7881	8.84722	11.3587	0.784393	9.47777	-3.55472	0.00233326	0.0766158	Cpb2	14	75242287	75283555	+	1629	protein_coding	carboxypeptidase B2 (plasma) [Source:MGI Symbol;Acc:MGI:1891837]	-	-
ENSMUSG00000027744	0	0.963468	0.997514	0	3.86416	378.506	25.9897	70.6132	0	0	1.16503	95.0218	-6.33588	0.00234163	0.0767005	Stoml3	3	53488653	53508502	+	2150	protein_coding	stomatin (Epb7.2)-like 3 [Source:MGI Symbol;Acc:MGI:2388072]	-	-
ENSMUSG00000027380	0	2.8904	5.98509	8.49837	3.86416	82.4567	24.0646	33.3451	3.9321	1.7475	4.2476	29.1092	-2.76885	0.00234248	0.0767005	Acoxl	2	127838876	128123873	+	3179	protein_coding	acyl-Coenzyme A oxidase-like [Source:MGI Symbol;Acc:MGI:1921371]	-	-
novel.907	0	0	0	1.0623	1.93208	5.96072	5.77549	25.4992	17.6944	0	0.598875	10.986	-4.16979	0.00235133	0.0768812	-	7	18755003	18760469	+	637	-	- && sp|P07572|POL_MPMV Gag-Pro-Pol polyprotein OS=Mason-Pfizer monkey virus OX=11855 GN=gag-pro-pol PE=1 SV=2 && -	-	-
ENSMUSG00000037196	9.49618	7.70774	23.9403	14.8721	8.69435	171.868	23.102	55.9021	5.89815	22.7175	12.9422	55.8974	-2.1092	0.0023568	0.0769511	Pacrg	17	10403012	10840311	-	1572	protein_coding	PARK2 co-regulated [Source:MGI Symbol;Acc:MGI:1916560]	-	-
ENSMUSG00000074997	0	1.92694	0.997514	4.24919	4.83019	9.93454	10.5884	9.80738	14.7454	15.7275	2.40077	12.1606	-2.32104	0.00236827	0.0772162	Pin1rt1	2	104713926	104716379	-	1172	protein_coding	protein (peptidyl-prolyl cis/trans isomerase) NIMA-interacting 1, retrogene 1 [Source:MGI Symbol;Acc:MGI:3649546]	-	-
ENSMUSG00000036894	432.076	301.565	369.08	313.377	345.842	502.688	474.553	539.406	489.546	422.021	352.388	485.643	-0.46358	0.00238283	0.077293	Rap2b	3	61361638	61368430	+	6793	protein_coding	RAP2B, member of RAS oncogene family [Source:MGI Symbol;Acc:MGI:1921262]	-	-
ENSMUSG00000027552	189.924	344.922	303.244	385.614	391.246	386.454	467.815	792.436	518.054	516.386	322.99	536.229	-0.730397	0.00238304	0.077293	E2f5	3	14578641	14606309	+	1782	protein_coding	E2F transcription factor 5 [Source:MGI Symbol;Acc:MGI:105091]	E2F-DP	E2F-DP
ENSMUSG00000057913	0	0	0	0	0	24.8363	7.70066	10.7881	0	0	0	8.66502	-5.51095	0.00238734	0.077293	Gm10032	14	66784480	66793758	+	2253	lincRNA	predicted gene 10032 [Source:MGI Symbol;Acc:MGI:3642901]	-	-
ENSMUSG00000108841	0	0.963468	1.99503	0	0	213.593	41.391	70.6132	0	0	0.591699	65.1194	-6.76513	0.00238762	0.077293	Frmpd2	14	33471696	33575269	+	6438	protein_coding	FERM and PDZ domain containing 2 [Source:MGI Symbol;Acc:MGI:2685472]	-	-
novel.507	36.7977	8.67121	21.9453	14.8721	15.4566	3.97382	1.92516	7.84591	8.84722	3.495	19.5486	5.21742	1.90401	0.00239101	0.077293	-	18	38105668	38107154	-	1487	-	- && - && -	-	-
ENSMUSG00000097193	5.93511	12.5251	8.97763	7.43607	9.66039	19.8691	24.0646	22.557	20.6435	27.0862	8.90686	22.8441	-1.34995	0.00239311	0.077293	Gm26664	8	84665128	84669406	+	705	lincRNA	predicted gene, 26664 [Source:MGI Symbol;Acc:MGI:5477158]	-	-
ENSMUSG00000019992	32.0496	45.283	31.9205	47.8033	46.3699	50.6661	71.2311	60.8058	93.3873	110.092	40.6853	77.2366	-0.924314	0.00239409	0.077293	Mtfr2	10	20347770	20361304	+	2140	protein_coding	mitochondrial fission regulator 2 [Source:MGI Symbol;Acc:MGI:1919054]	-	-
ENSMUSG00000066196	0	5.78081	16.9577	10.623	20.2868	195.71	16.3639	50.9984	23.5926	8.7375	10.7297	59.0806	-2.45372	0.00239741	0.077293	Spag8	4	43651335	43653594	-	1662	protein_coding	sperm associated antigen 8 [Source:MGI Symbol;Acc:MGI:3056295]	-	-
ENSMUSG00000075569	14.2443	29.8675	25.9354	24.4328	10.6264	244.39	48.1291	64.7287	57.0154	4.36875	21.0213	83.7263	-1.99167	0.00240691	0.0774911	Rsph10b	5	143933035	143985719	+	3101	protein_coding	radial spoke head 10 homolog B (Chlamydomonas) [Source:MGI Symbol;Acc:MGI:1922386]	-	-
ENSMUSG00000061298	0	0	0	0	0	31.7905	0	6.86517	0	6.11625	0	8.95439	-5.55893	0.00242509	0.0778495	Agbl4	4	110397661	111664324	+	9599	protein_coding	ATP/GTP binding protein-like 4 [Source:MGI Symbol;Acc:MGI:1918244]	-	-
ENSMUSG00000047230	18.9924	8.67121	19.9503	2.12459	5.79623	399.368	72.1937	85.3242	5.89815	4.36875	11.1069	113.431	-3.35382	0.00242807	0.0778495	Cldn2	X	139800828	139811386	+	3325	protein_coding	claudin 2 [Source:MGI Symbol;Acc:MGI:1276110]	-	-
ENSMUSG00000027867	0	0	0.997514	2.12459	0.966039	235.449	16.3639	32.3644	0	0	0.817629	56.8354	-6.11566	0.00242816	0.0778495	Spag17	3	99885406	100143322	+	8489	protein_coding	sperm associated antigen 17 [Source:MGI Symbol;Acc:MGI:1921612]	-	-
ENSMUSG00000051965	0	0	0.997514	0	0	9.93454	0.962582	9.80738	2.94907	5.2425	0.199503	5.77921	-4.34994	0.00243806	0.0780585	Nanos2	7	18987400	18988962	+	1563	protein_coding	nanos C2HC-type zinc finger 2 [Source:MGI Symbol;Acc:MGI:2676627]	-	-
ENSMUSG00000044405	0	0.963468	0	2.12459	1.93208	75.5025	5.77549	16.6725	0	0	1.00403	19.5901	-4.27139	0.00244418	0.078146	Adig	2	158502612	158508198	+	810	protein_coding	adipogenin [Source:MGI Symbol;Acc:MGI:2675492]	-	-
ENSMUSG00000031538	1096.81	1539.62	1930.19	1128.16	1488.67	4640.42	1547.83	3074.61	2057.47	1712.55	1436.69	2606.58	-0.859219	0.00244954	0.0782092	Plat	8	22757727	22782844	+	6241	protein_coding	plasminogen activator, tissue [Source:MGI Symbol;Acc:MGI:97610]	-	-
ENSMUSG00000055895	9.49618	0.963468	4.98757	9.56067	3.86416	5.96072	20.2142	47.0754	18.6775	25.3387	5.77441	23.4533	-2.03906	0.00246255	0.078516	Oosp2	19	11647279	11660559	-	678	protein_coding	oocyte secreted protein 2 [Source:MGI Symbol;Acc:MGI:2684945]	-	-
ENSMUSG00000032718	213.664	170.534	196.51	175.279	209.63	274.193	302.251	321.682	215.282	268.241	193.123	276.33	-0.51747	0.00247961	0.0789216	Mansc1	6	134609207	134632488	-	2376	protein_coding	MANSC domain containing 1 [Source:MGI Symbol;Acc:MGI:1914979]	-	-
ENSMUSG00000063409	0	0	0.997514	1.0623	0.966039	98.3519	17.3265	37.2681	0	0	0.60517	30.5893	-5.64807	0.00248211	0.0789216	Lrrc43	5	123489305	123508205	+	2066	protein_coding	leucine rich repeat containing 43 [Source:MGI Symbol;Acc:MGI:2685907]	-	-
ENSMUSG00000031621	22.5534	30.831	22.9428	53.1148	13.5245	3.97382	13.4762	6.86517	15.7284	4.36875	28.5933	8.88246	1.68899	0.00249377	0.0791833	Isx	8	74873173	74893506	+	1793	protein_coding	intestine specific homeobox [Source:MGI Symbol;Acc:MGI:1918847]	HB-other	HB->HB-other
ENSMUSG00000104301	0	0	0	0	0	31.7905	9.62582	3.92295	0	0	0	9.06786	-5.57658	0.00250145	0.0793179	Wdr49	3	75274988	75482156	-	5513	protein_coding	WD repeat domain 49 [Source:MGI Symbol;Acc:MGI:3645287]	-	-
ENSMUSG00000035239	442.759	341.068	365.09	515.214	578.657	631.837	865.362	647.287	525.918	718.222	448.558	677.725	-0.59561	0.00250809	0.0794194	Neu3	7	99811439	99828417	-	3341	protein_coding	neuraminidase 3 [Source:MGI Symbol;Acc:MGI:1355305]	-	-
ENSMUSG00000110457	0	1.92694	0	3.18689	0.966039	0.993454	18.2891	15.6918	4.91512	17.475	1.21597	11.4729	-3.22821	0.0025119	0.0794311	Gm45752	8	105973097	105985879	+	3186	lincRNA	predicted gene 45752 [Source:MGI Symbol;Acc:MGI:5804867]	-	-
ENSMUSG00000062859	0	1.92694	3.99006	10.623	13.5245	147.031	19.2516	32.3644	11.7963	1.7475	6.0129	42.4382	-2.81168	0.00251789	0.0795115	Tcp11	17	28066745	28080639	-	3841	protein_coding	t-complex protein 11 [Source:MGI Symbol;Acc:MGI:98544]	-	-
ENSMUSG00000070877	0	1.92694	0	0	0.966039	191.737	47.1665	57.8636	0	0	0.578595	59.3533	-6.65362	0.00253389	0.0799075	Ldlrad1	4	107209180	107218060	+	1093	protein_coding	low density lipoprotein receptor class A domain containing 1 [Source:MGI Symbol;Acc:MGI:3652166]	-	-
ENSMUSG00000060445	1.18702	5.78081	0.997514	16.9967	8.69435	2.98036	31.7652	47.0754	41.287	39.3187	6.73129	32.4854	-2.26796	0.00256349	0.080684	Sycp2	2	178345293	178407685	-	5967	protein_coding	synaptonemal complex protein 2 [Source:MGI Symbol;Acc:MGI:1933281]	-	-
ENSMUSG00000099719	0	2.8904	0	0	0.966039	8.94108	10.5884	7.84591	5.89815	6.99	0.771289	8.05271	-3.32354	0.0025655	0.080684	Gm28802	1	58850085	58892792	-	944	unprocessed_pseudogene	predicted gene 28802 [Source:MGI Symbol;Acc:MGI:5579508]	-	-
ENSMUSG00000053153	1.18702	9.63468	22.9428	1.0623	3.86416	427.185	80.8569	85.3242	0.983025	6.11625	7.7382	120.093	-3.95222	0.00258234	0.081103	Spag16	1	69826970	70725132	+	6764	protein_coding	sperm associated antigen 16 [Source:MGI Symbol;Acc:MGI:1913972]	-	-
ENSMUSG00000050635	0	0	0	0	0	4.96727	1.92516	12.7496	11.7963	0	0	6.28766	-5.04748	0.00260249	0.0816248	Sprr2f	3	92365187	92366442	+	609	protein_coding	small proline-rich protein 2F [Source:MGI Symbol;Acc:MGI:1330349]	-	-
ENSMUSG00000078964	0	1.92694	0	0	0.966039	54.64	14.4387	7.84591	0	0	0.578595	15.3849	-4.68706	0.00261618	0.0819429	Ces1b	8	93056728	93080017	-	1964	protein_coding	carboxylesterase 1B [Source:MGI Symbol;Acc:MGI:3779470]	-	-
ENSMUSG00000049134	13.0572	20.2328	7.98011	3.18689	6.76227	39.7382	40.4285	18.634	19.6605	34.0762	10.2439	30.5075	-1.57355	0.00262961	0.082252	Nrap	19	56320035	56390037	-	5507	protein_coding	nebulin-related anchoring protein [Source:MGI Symbol;Acc:MGI:1098765]	Others	Others
ENSMUSG00000001948	40.3588	30.831	54.8633	70.1116	57.9623	177.828	93.3705	116.708	62.9136	70.7737	50.8254	104.319	-1.0363	0.00263592	0.0822898	Spa17	9	37603290	37613722	-	1061	protein_coding	sperm autoantigenic protein 17 [Source:MGI Symbol;Acc:MGI:1333778]	-	-
ENSMUSG00000005232	0	0	0	1.0623	2.89812	33.7774	2.88775	28.4414	0	4.36875	0.792083	13.8951	-4.10528	0.00264068	0.0822898	G6pc2	2	69211073	69227841	+	1974	protein_coding	glucose-6-phosphatase, catalytic, 2 [Source:MGI Symbol;Acc:MGI:1277193]	-	-
ENSMUSG00000030397	1470.72	1409.55	1538.17	1411.79	1731.14	1240.82	1143.55	1029.78	1318.24	1092.19	1512.27	1164.91	0.376723	0.00264152	0.0822898	Mark4	7	19424775	19458821	-	4668	protein_coding	MAP/microtubule affinity regulating kinase 4 [Source:MGI Symbol;Acc:MGI:1920955]	-	-
ENSMUSG00000009545	75.9694	80.9313	111.722	92.4198	109.162	358.637	167.489	132.4	146.471	109.219	94.0409	182.843	-0.957576	0.00265329	0.0825198	Kcnq1	7	143106362	143427042	+	4093	protein_coding	potassium voltage-gated channel, subfamily Q, member 1 [Source:MGI Symbol;Acc:MGI:108083]	-	-
ENSMUSG00000040653	2.37404	6.74428	31.9205	11.6853	6.76227	151.005	25.9897	116.708	11.7963	5.2425	11.8973	62.1483	-2.38053	0.00265696	0.0825198	Ppp1r14c	10	3366057	3464975	+	2617	protein_coding	protein phosphatase 1, regulatory inhibitor subunit 14C [Source:MGI Symbol;Acc:MGI:1923392]	-	-
ENSMUSG00000029651	30.8626	48.1734	45.8857	46.741	56.0303	111.267	60.6427	139.265	57.0154	77.7637	45.5386	89.1907	-0.965924	0.00265962	0.0825198	Mtus2	5	147957320	148316065	+	12874	protein_coding	microtubule associated tumor suppressor candidate 2 [Source:MGI Symbol;Acc:MGI:1915388]	-	-
ENSMUSG00000035486	0	3.85387	0.997514	1.0623	0	130.142	12.5136	59.825	0.983025	0	1.18274	40.6928	-5.08944	0.00266585	0.0825371	Plk5	10	80356459	80365489	+	2678	protein_coding	polo like kinase 5 [Source:MGI Symbol;Acc:MGI:3026984]	-	-
ENSMUSG00000037188	30.8626	30.831	45.8857	29.7443	24.151	11.9214	10.5884	8.82664	21.6265	15.7275	32.2949	13.7381	1.23216	0.00266733	0.0825371	Grhl3	4	135541888	135573630	-	2789	protein_coding	grainyhead like transcription factor 3 [Source:MGI Symbol;Acc:MGI:2655333]	-	-
ENSMUSG00000028600	4.74809	31.7944	16.9577	24.4328	20.2868	196.704	33.6904	58.8443	25.5586	27.96	19.644	68.5514	-1.7973	0.00268495	0.082971	Podn	4	108014791	108096445	-	4270	protein_coding	podocan [Source:MGI Symbol;Acc:MGI:2674939]	-	-
novel.576	0	0	0	0	1.93208	40.7316	18.2891	7.84591	0	0	0.386416	13.3733	-4.98319	0.00269657	0.0832186	-	2	30162658	30164076	+	1419	-	- && sp|P11227|POL_MLVRD Gag-Pol polyprotein OS=Radiation murine leukemia virus OX=11787 GN=pol PE=3 SV=2 && -	-	-
ENSMUSG00000056752	47.4809	43.3561	104.739	26.5574	58.9284	1440.51	190.591	149.072	57.0154	47.1825	56.2123	376.874	-2.74473	0.00273239	0.0842117	Dnah9	11	65831282	66168551	-	15949	protein_coding	dynein, axonemal, heavy chain 9 [Source:MGI Symbol;Acc:MGI:1289279]	-	-
ENSMUSG00000029919	115.141	93.4564	201.498	105.167	111.094	581.17	159.789	593.347	98.3025	145.042	125.271	315.53	-1.3323	0.00277555	0.0854276	Hpgds	6	65117293	65144908	-	6425	protein_coding	hematopoietic prostaglandin D synthase [Source:MGI Symbol;Acc:MGI:1859384]	-	-
ENSMUSG00000040740	84.2786	55.8811	73.8161	83.9214	103.366	38.7447	52.942	44.1332	34.4059	56.7937	80.2527	45.4039	0.81897	0.00280278	0.0860582	Slc25a34	4	141618824	141623821	-	2670	protein_coding	solute carrier family 25, member 34 [Source:MGI Symbol;Acc:MGI:2686215]	-	-
ENSMUSG00000043832	52.229	64.5524	63.8409	75.423	45.4038	106.3	168.452	97.0931	74.7099	92.6174	60.2898	107.834	-0.838558	0.00280349	0.0860582	Clec4a3	6	122952515	122969875	+	1327	protein_coding	C-type lectin domain family 4, member a3 [Source:MGI Symbol;Acc:MGI:1920399]	-	-
ENSMUSG00000047419	61.7252	49.1369	31.9205	69.0493	66.6567	181.802	92.4079	87.2857	89.4552	83.88	55.6977	106.966	-0.94206	0.00281297	0.0862345	Cmya5	13	93040713	93144724	-	11850	protein_coding	cardiomyopathy associated 5 [Source:MGI Symbol;Acc:MGI:1923719]	-	-
ENSMUSG00000043453	0	0	0	6.37378	1.93208	6.95418	14.4387	17.6533	8.84722	13.98	1.66117	12.3747	-2.90196	0.00282509	0.0864913	Magea10	X	72381870	72386858	-	1821	protein_coding	melanoma antigen family A, 10 [Source:MGI Symbol;Acc:MGI:3588211]	-	-
ENSMUSG00000107714	0	0	0	4.24919	5.79623	11.9214	4.81291	18.634	28.5077	11.3587	2.00908	15.047	-2.88983	0.0028363	0.0865375	Gm34933	6	107181206	107276738	-	1067	lincRNA	predicted gene, 34933 [Source:MGI Symbol;Acc:MGI:5594092]	-	-
ENSMUSG00000062300	2803.75	2585.95	2076.82	2344.49	1779.44	1576.61	1698	1296.54	1975.88	1665.37	2318.09	1642.48	0.496887	0.00283775	0.0865375	Nectin2	7	19716644	19750483	-	3494	protein_coding	nectin cell adhesion molecule 2 [Source:MGI Symbol;Acc:MGI:97822]	-	-
ENSMUSG00000029182	0	0	5.98509	0	0	133.123	35.6155	38.2488	5.89815	0.87375	1.19702	42.7518	-5.14724	0.00283785	0.0865375	1700001C02Rik	5	30466047	30484088	+	1038	protein_coding	RIKEN cDNA 1700001C02 gene [Source:MGI Symbol;Acc:MGI:1922684]	-	-
ENSMUSG00000064325	299.13	122.36	300.252	231.581	296.574	454.008	526.533	489.388	298.839	358.237	249.979	425.401	-0.767535	0.00284471	0.0866322	Hhip	8	79965851	80058006	-	9076	protein_coding	Hedgehog-interacting protein [Source:MGI Symbol;Acc:MGI:1341847]	-	-
ENSMUSG00000049404	39.1717	26.0136	107.732	78.6099	37.6755	41.7251	16.3639	22.557	12.7793	7.86375	57.8405	20.2578	1.51733	0.00286223	0.0869902	Rarres1	3	67478972	67515523	-	1325	protein_coding	retinoic acid receptor responder (tazarotene induced) 1 [Source:MGI Symbol;Acc:MGI:1924461]	-	-
ENSMUSG00000096215	1.18702	0.963468	8.97763	5.31148	6.76227	88.4174	11.551	25.4992	5.89815	5.2425	4.64037	27.3216	-2.54874	0.002864	0.0869902	Smim22	16	5007288	5008309	+	561	protein_coding	small integral membrane protein 22 [Source:MGI Symbol;Acc:MGI:3643379]	-	-
ENSMUSG00000028558	4.74809	25.0502	8.97763	22.3082	20.2868	28.8102	38.5033	41.191	45.2191	49.8037	16.2742	40.7055	-1.31428	0.00289021	0.0876711	Calr4	4	109234485	109254571	+	2522	protein_coding	calreticulin 4 [Source:MGI Symbol;Acc:MGI:2140435]	-	-
ENSMUSG00000056293	0	0.963468	1.99503	3.18689	1.93208	14.9018	18.2891	5.88443	9.83025	3.495	1.61549	10.4801	-2.67984	0.00290407	0.0879757	Gsdmc2	15	63824346	63845177	-	2315	protein_coding	gasdermin C2 [Source:MGI Symbol;Acc:MGI:2146102]	-	-
ENSMUSG00000032514	0	10.5981	15.9602	0	0	747.077	119.36	121.612	11.7963	2.62125	5.31168	200.493	-5.23454	0.00291014	0.088044	Ttc21a	9	119937606	119967793	+	5388	protein_coding	tetratricopeptide repeat domain 21A [Source:MGI Symbol;Acc:MGI:1921302]	-	-
ENSMUSG00000032121	168.557	162.826	244.391	156.158	205.766	1080.88	209.843	442.313	196.605	230.67	187.54	432.062	-1.20356	0.00293596	0.088709	Tmem218	9	37208223	37224700	+	2619	protein_coding	transmembrane protein 218 [Source:MGI Symbol;Acc:MGI:1913529]	-	-
ENSMUSG00000032311	42.7328	15.4155	14.9627	14.8721	25.117	73.5156	41.391	64.7287	41.287	37.5712	22.62	51.6987	-1.20057	0.00295178	0.0890705	Nrg4	9	55220222	55326844	-	6075	protein_coding	neuregulin 4 [Source:MGI Symbol;Acc:MGI:1933833]	-	-
ENSMUSG00000029074	45.1068	74.187	100.749	99.8559	58.9284	176.835	120.323	195.167	124.844	88.2487	75.7654	141.083	-0.894449	0.00297188	0.0895599	Ttll10	4	156034840	156059414	-	3985	protein_coding	tubulin tyrosine ligase-like family, member 10 [Source:MGI Symbol;Acc:MGI:1921855]	-	-
ENSMUSG00000089636	0	2.8904	1.99503	8.49837	12.5585	2.98036	24.0646	39.2295	34.4059	30.5812	5.18846	26.2523	-2.32787	0.00297847	0.0896414	1700058P15Rik	7	19258492	19259739	+	413	antisense	RIKEN cDNA 1700058P15 gene [Source:MGI Symbol;Acc:MGI:1920627]	-	-
ENSMUSG00000056632	0	0	0	0	0	34.7709	4.81291	4.90369	0	0	0	8.8975	-5.54909	0.00299251	0.0899467	Dsg3	18	20510304	20541310	+	4108	protein_coding	desmoglein 3 [Source:MGI Symbol;Acc:MGI:99499]	-	-
ENSMUSG00000000167	3.56107	15.4155	22.9428	11.6853	23.1849	121.201	29.8401	63.748	16.7114	26.2125	15.3579	51.5427	-1.73821	0.00301208	0.0904173	Pih1d2	9	50617321	50625000	+	2813	protein_coding	PIH1 domain containing 2 [Source:MGI Symbol;Acc:MGI:1919864]	-	-
ENSMUSG00000048922	204.168	154.155	139.652	205.023	195.14	298.036	312.839	170.648	296.873	329.404	179.628	281.56	-0.649795	0.00302109	0.0904693	Cdca2	14	67676331	67715841	-	5715	protein_coding	cell division cycle associated 2 [Source:MGI Symbol;Acc:MGI:1919787]	-	-
ENSMUSG00000020799	8.30916	0	23.9403	5.31148	0.966039	405.329	56.7924	125.534	1.96605	16.6012	7.7054	121.245	-3.97671	0.00302165	0.0904693	Tekt1	11	72344722	72362442	-	1622	protein_coding	tektin 1 [Source:MGI Symbol;Acc:MGI:1333819]	-	-
ENSMUSG00000019762	0	1.92694	0	0	1.93208	35.7643	0.962582	21.5762	1.96605	1.7475	0.771803	12.4033	-3.95934	0.00305738	0.0912968	Iyd	10	3540240	3554877	+	1623	protein_coding	iodotyrosine deiodinase [Source:MGI Symbol;Acc:MGI:1917587]	-	-
ENSMUSG00000026600	17335.3	19281.9	19999.2	21292.7	13469.5	14431.9	13690.8	11762	14708	12791.7	18275.7	13476.9	0.43944	0.00305816	0.0912968	Soat1	1	156424525	156474331	-	9791	protein_coding	sterol O-acyltransferase 1 [Source:MGI Symbol;Acc:MGI:104665]	-	-
novel.841	0	0.963468	3.99006	0	0	579.184	61.6053	94.1509	0	0	0.990705	146.988	-7.20466	0.00306115	0.0912968	-	5	137177736	137180473	-	2027	-	- && - && -	-	-
ENSMUSG00000039103	499.736	496.186	575.566	552.394	453.072	554.347	719.049	902.279	870.96	622.983	515.391	733.924	-0.509871	0.00307911	0.0916191	Nexn	3	152236982	152266350	-	3826	protein_coding	nexilin [Source:MGI Symbol;Acc:MGI:1916060]	-	-
ENSMUSG00000064065	23.7404	8.67121	50.8732	35.0558	27.0491	103.319	66.4182	33.3451	99.2855	57.6675	29.078	72.0071	-1.30792	0.0030799	0.0916191	Ipcef1	10	6885796	7052478	-	9003	protein_coding	interaction protein for cytohesin exchange factors 1 [Source:MGI Symbol;Acc:MGI:2444159]	-	-
ENSMUSG00000061535	372.725	382.497	449.879	322.938	355.502	461.956	474.553	527.637	492.495	636.963	376.708	518.721	-0.461726	0.00310138	0.0921393	C1qtnf7	5	43515538	43618803	+	4162	protein_coding	C1q and tumor necrosis factor related protein 7 [Source:MGI Symbol;Acc:MGI:1925911]	-	-
ENSMUSG00000033880	1583.49	1982.82	2281.32	2000.3	2188.08	1686.88	1338.95	1602.53	1386.06	1526.44	2007.2	1508.17	0.412661	0.00312989	0.0928669	Lgals3bp	11	118392751	118402092	-	2847	protein_coding	lectin, galactoside-binding, soluble, 3 binding protein [Source:MGI Symbol;Acc:MGI:99554]	-	-
ENSMUSG00000001313	738.328	784.263	1066.34	922.073	1145.72	335.787	718.086	634.538	538.697	729.581	931.346	591.338	0.655269	0.00313615	0.0929331	Rnd2	11	101464999	101471853	+	1990	protein_coding	Rho family GTPase 2 [Source:MGI Symbol;Acc:MGI:1338755]	-	-
ENSMUSG00000087268	54.603	47.2099	54.8633	41.4296	79.2152	24.8363	33.6904	31.3836	19.6605	34.95	55.4642	28.9042	0.939362	0.00315731	0.0934402	Gm14486	2	30658468	30678011	-	790	lincRNA	predicted gene 14486 [Source:MGI Symbol;Acc:MGI:3649723]	-	-
novel.733	3.56107	0	0.997514	9.56067	2.89812	8.94108	12.5136	26.4799	13.7623	20.0962	3.40347	16.3586	-2.28276	0.00316322	0.0934765	-	4	131737911	131743960	+	1119	-	- && - && -	-	-
ENSMUSG00000018604	3421	2165.88	1978.07	1294.94	1816.15	1217.97	1232.11	1457.38	1385.08	1481.88	2135.21	1354.88	0.655961	0.00316664	0.0934765	Tbx3	5	119670669	119684724	+	6624	protein_coding	T-box 3 [Source:MGI Symbol;Acc:MGI:98495]	-	-
ENSMUSG00000068940	5.93511	0.963468	3.99006	7.43607	15.4566	31.7905	27.9149	24.5185	9.83025	26.2125	6.75627	24.0533	-1.82998	0.00318202	0.0938106	Tcl1b3	12	105191043	105195612	+	1045	protein_coding	T cell leukemia/lymphoma 1B, 3 [Source:MGI Symbol;Acc:MGI:1351600]	-	-
ENSMUSG00000064137	2106.96	504.857	246.386	56.3017	437.616	55.6334	68.3433	80.4205	208.401	202.71	670.425	123.102	2.44484	0.00320785	0.0944514	Rhox8	X	37874778	37878944	-	1204	protein_coding	reproductive homeobox 8 [Source:MGI Symbol;Acc:MGI:3579898]	HB-other	HB->HB-other
ENSMUSG00000032254	489.053	360.337	322.197	447.227	415.397	454.008	583.325	529.599	637.983	757.541	406.842	592.491	-0.543533	0.00322327	0.0947848	Kif23	9	61915905	61946774	-	7901	protein_coding	kinesin family member 23 [Source:MGI Symbol;Acc:MGI:1919069]	-	-
novel.334	0	0	0.997514	0	0.966039	5.96072	7.70066	4.90369	5.89815	4.36875	0.392711	5.76639	-3.76974	0.00323236	0.0949311	-	15	31971084	31975943	+	243	-	- && - && -	-	-
ENSMUSG00000038987	13.0572	21.1963	22.9428	18.059	34.7774	194.717	56.7924	86.305	21.6265	12.2325	22.0066	74.3347	-1.75193	0.00323674	0.0949389	Cfap157	2	32777381	32784428	-	1779	protein_coding	cilia and flagella associated protein 157 [Source:MGI Symbol;Acc:MGI:2447809]	-	-
ENSMUSG00000022972	66.4732	60.6985	75.8111	73.2984	106.264	207.632	126.098	101.016	112.065	117.082	76.5091	132.779	-0.793441	0.00324171	0.094964	Cfap298	16	90925809	90935114	-	1589	protein_coding	cilia and flagella associate protien 298 [Source:MGI Symbol;Acc:MGI:1915251]	-	-
ENSMUSG00000049493	1.18702	4.81734	49.8757	9.56067	18.3547	252.337	32.7278	131.419	54.0663	47.1825	16.7591	103.547	-2.62383	0.00326553	0.0954988	Pls1	9	95752642	95845311	-	3890	protein_coding	plastin 1 (I-isoform) [Source:MGI Symbol;Acc:MGI:104809]	-	-
ENSMUSG00000043913	13.0572	6.74428	18.9528	2.12459	13.5245	142.064	49.0917	53.9406	4.91512	6.99	10.8807	51.4003	-2.23869	0.00327031	0.0954988	Ccdc60	5	116124641	116288985	-	4703	protein_coding	coiled-coil domain containing 60 [Source:MGI Symbol;Acc:MGI:2141043]	-	-
ENSMUSG00000033788	555.526	509.675	560.603	489.719	576.725	484.805	383.108	301.087	402.057	389.692	538.45	392.15	0.457516	0.00327238	0.0954988	Dysf	6	84008590	84211060	+	8328	protein_coding	dysferlin [Source:MGI Symbol;Acc:MGI:1349385]	-	-
ENSMUSG00000022014	74.7824	81.8948	101.746	61.6132	77.2831	216.573	128.023	189.282	97.3194	89.9962	79.464	144.239	-0.858234	0.0033027	0.0961813	Epsti1	14	77904239	78002657	+	2321	protein_coding	epithelial stromal interaction 1 (breast) [Source:MGI Symbol;Acc:MGI:1915168]	-	-
ENSMUSG00000031174	220.786	116.58	134.664	203.961	161.328	421.224	233.908	261.857	231.011	237.66	167.464	277.132	-0.728337	0.0033041	0.0961813	Rpgr	X	10073621	10216920	-	7247	protein_coding	retinitis pigmentosa GTPase regulator [Source:MGI Symbol;Acc:MGI:1344037]	-	-
novel.338	1835.14	1994.38	1714.73	2119.28	1895.37	1137.5	1103.12	1832.02	1396.88	1404.99	1911.78	1374.9	0.475589	0.00332868	0.096775	-	15	82358743	82367983	+	6118	-	- && sp|P03359|POL_WMSV Gag-Pol polyprotein OS=Woolly monkey sarcoma virus OX=11970 GN=pol PE=3 SV=2 && PF01140:Matrix protein (MA), p15	-	-
ENSMUSG00000040296	1296.23	860.377	1074.32	849.837	833.692	702.372	620.866	821.859	588.832	725.212	982.891	691.828	0.506079	0.00334527	0.097135	Ddx58	4	40203773	40239828	-	7050	protein_coding	DEAD (Asp-Glu-Ala-Asp) box polypeptide 58 [Source:MGI Symbol;Acc:MGI:2442858]	-	-
ENSMUSG00000079455	1.18702	0	0	1.0623	4.83019	12.9149	7.70066	9.80738	13.7623	6.11625	1.4159	10.0603	-2.8144	0.00335574	0.0973163	Gm16026	1	85266698	85285491	+	4005	transcribed_unprocessed_pseudogene	predicted pseudogene 16026 [Source:MGI Symbol;Acc:MGI:3783243]	-	-
ENSMUSG00000026809	11.8702	10.5981	14.9627	6.37378	3.86416	114.247	19.2516	69.6324	3.9321	9.61124	9.5338	43.3349	-2.18488	0.0033697	0.0975987	Spaca9	2	28692080	28699727	-	747	protein_coding	sperm acrosome associated 9 [Source:MGI Symbol;Acc:MGI:1917237]	-	-
ENSMUSG00000086236	0	0.963468	0	0	0.966039	5.96072	5.77549	3.92295	5.89815	6.99	0.385901	5.70946	-3.75754	0.00338106	0.0978051	5830418P13Rik	9	103423578	103461260	+	2764	antisense	RIKEN cDNA 5830418P13 gene [Source:MGI Symbol;Acc:MGI:3604110]	-	-
ENSMUSG00000057719	5.93511	8.67121	6.9826	15.9344	8.69435	31.7905	18.2891	25.4992	27.5247	17.475	9.24354	24.1157	-1.38002	0.0034131	0.0986083	Sh3rf2	18	42053667	42158960	+	5307	protein_coding	SH3 domain containing ring finger 2 [Source:MGI Symbol;Acc:MGI:2444628]	-	-
ENSMUSG00000029312	332.366	449.94	333.17	398.361	307.2	545.406	523.645	475.658	520.02	437.749	364.207	500.495	-0.457965	0.00344399	0.0993763	Klhl8	5	103861973	103911259	-	3489	protein_coding	kelch-like 8 [Source:MGI Symbol;Acc:MGI:2179430]	-	-
ENSMUSG00000037606	1012.53	851.706	966.591	910.388	1128.33	1489.19	1194.56	1346.55	1054.79	1470.52	973.91	1311.12	-0.429058	0.0034572	0.0996331	Osbpl5	7	143688762	143756985	-	4915	protein_coding	oxysterol binding protein-like 5 [Source:MGI Symbol;Acc:MGI:1930265]	-	-
ENSMUSG00000090113	0	2.8904	2.99254	4.24919	1.93208	166.9	19.2516	16.6725	3.9321	0	2.41284	41.3513	-4.09225	0.00346911	0.0998517	Nhlrc4	17	25942233	25944961	-	2318	protein_coding	NHL repeat containing 4 [Source:MGI Symbol;Acc:MGI:3687200]	-	-
ENSMUSG00000011632	0	0	0	5.31148	2.89812	7.94763	22.1394	24.5185	2.94907	9.61124	1.64192	13.4332	-3.02921	0.00347516	0.0999012	Pinlyp	7	24541658	24546118	-	843	protein_coding	phospholipase A2 inhibitor and LY6/PLAUR domain containing [Source:MGI Symbol;Acc:MGI:3615324]	-	-
ENSMUSG00000079112	1.18702	0	3.99006	3.18689	4.83019	16.8887	12.5136	20.5955	6.88117	7.86375	2.63883	12.9485	-2.28363	0.00349365	0.100308	Fam90a1a	8	21958714	21964303	+	1887	protein_coding	family with sequence similarity 90, member A1A [Source:MGI Symbol;Acc:MGI:2142877]	-	-
ENSMUSG00000043164	0	8.67121	7.98011	0	0.966039	290.089	102.034	160.841	0	4.36875	3.52347	111.466	-4.97709	0.00350723	0.100573	Tmem212	3	27866066	27896368	-	716	protein_coding	transmembrane protein 212 [Source:MGI Symbol;Acc:MGI:2685410]	-	-
ENSMUSG00000064215	1947.9	2087.84	2276.33	2103.35	2844.02	1310.37	1553.61	1887.92	1768.46	1720.41	2251.89	1648.15	0.450405	0.00354356	0.101488	Ifi27	12	103434211	103440239	+	1467	protein_coding	interferon, alpha-inducible protein 27 [Source:MGI Symbol;Acc:MGI:1277180]	-	-
ENSMUSG00000028957	148.378	160.899	233.418	292.131	410.567	395.395	392.734	452.12	422.701	436.001	249.079	419.79	-0.752049	0.00355799	0.101775	Per3	4	151003652	151044665	-	9608	protein_coding	period circadian clock 3 [Source:MGI Symbol;Acc:MGI:1277134]	-	-
ENSMUSG00000019767	30.8626	11.5616	29.9254	40.3673	7.72831	228.494	62.5679	61.7865	30.4738	21.8437	24.089	81.0332	-1.75288	0.00357977	0.102271	Ccdc170	10	4482502	4562231	+	3792	protein_coding	coiled-coil domain containing 170 [Source:MGI Symbol;Acc:MGI:2685067]	-	-
ENSMUSG00000048794	5.93511	2.8904	10.9727	5.31148	22.2189	173.854	42.3536	38.2488	0	19.2225	9.46571	54.7359	-2.52736	0.00363788	0.103803	Cfap100	6	90403479	90428797	-	4122	protein_coding	cilia and flagella associated protein 100 [Source:MGI Symbol;Acc:MGI:2141635]	-	-
ENSMUSG00000013822	578.08	782.336	638.409	805.221	781.525	954.709	941.406	1104.31	899.467	895.593	717.114	959.097	-0.418835	0.00365743	0.10417	Elof1	9	22112989	22117172	-	1702	protein_coding	ELF1 homolog, elongation factor 1 [Source:MGI Symbol;Acc:MGI:1913376]	-	-
ENSMUSG00000057402	1.18702	0	0.997514	0	0	3.97382	2.88775	4.90369	5.89815	12.2325	0.436907	5.97918	-3.82745	0.00365975	0.10417	Cldn34b2	X	155124917	155128412	-	1077	protein_coding	claudin 34B2 [Source:MGI Symbol;Acc:MGI:1920597]	-	-
ENSMUSG00000000037	58.1641	67.4428	54.8633	69.0493	90.8077	89.4108	109.734	114.746	123.861	102.229	68.0654	107.996	-0.663486	0.00367364	0.104436	Scml2	X	161117193	161258213	+	6079	protein_coding	Scm polycomb group protein like 2 [Source:MGI Symbol;Acc:MGI:1340042]	-	-
ENSMUSG00000039831	3562.25	3070.57	3254.89	4025.04	3523.14	4057.27	4845.64	4046.53	4548.45	4864.16	3487.18	4472.41	-0.359114	0.00370547	0.105212	Arhgap29	3	121952541	122016753	+	8815	protein_coding	Rho GTPase activating protein 29 [Source:MGI Symbol;Acc:MGI:2443818]	-	-
ENSMUSG00000045275	35.6107	49.1369	57.8558	45.6787	85.9775	203.658	103.959	81.4013	94.3704	70.7737	54.8519	110.832	-1.01068	0.00371639	0.105392	Lca5l	16	96158407	96192271	-	6583	protein_coding	Leber congenital amaurosis 5-like [Source:MGI Symbol;Acc:MGI:3041157]	-	-
ENSMUSG00000035027	2048.8	1969.33	2060.86	1848.4	2166.83	1767.35	1462.16	1596.64	1710.46	1572.75	2018.84	1621.87	0.315987	0.00372277	0.105443	Map2k2	10	81105915	81133975	+	5663	protein_coding	mitogen-activated protein kinase kinase 2 [Source:MGI Symbol;Acc:MGI:1346867]	-	-
ENSMUSG00000026872	5691.77	3693.94	4331.21	3620.31	3602.36	3149.25	2954.17	2879.45	2994.29	3346.46	4187.92	3064.72	0.450286	0.00373861	0.105762	Zeb2	2	44983632	45117395	-	19942	protein_coding	zinc finger E-box binding homeobox 2 [Source:MGI Symbol;Acc:MGI:1344407]	C2H2	C2H2
ENSMUSG00000019982	0	6.74428	17.9553	9.56067	1.93208	190.743	46.204	66.6902	10.8133	6.11625	7.23846	64.1134	-3.14266	0.00378064	0.106821	Myb	10	21124935	21160984	-	8933	protein_coding	myeloblastosis oncogene [Source:MGI Symbol;Acc:MGI:97249]	MYB	MYB->MYB
ENSMUSG00000047534	339.488	213.89	166.585	269.823	256	272.206	381.183	355.027	494.461	471.825	249.157	394.94	-0.666248	0.00379354	0.106988	Mis18bp1	12	65132734	65172604	-	7990	protein_coding	MIS18 binding protein 1 [Source:MGI Symbol;Acc:MGI:2145099]	Others	Others
ENSMUSG00000113265	0	0	0	3.18689	0	0	12.5136	4.90369	25.5586	12.2325	0.637378	11.0417	-4.13645	0.00379585	0.106988	Gm30198	12	102447328	102467609	+	824	lincRNA	predicted gene, 30198 [Source:MGI Symbol;Acc:MGI:5589357]	-	-
novel.111	0	0	0	0	0	0	8.66324	18.634	1.96605	1.7475	0	6.20216	-5.02901	0.00380887	0.107224	-	10	83937956	83963730	-	536	-	- && - && -	-	-
ENSMUSG00000021747	26.1145	12.5251	30.9229	16.9967	13.5245	74.509	37.5407	72.5746	23.5926	34.0762	20.0168	48.4586	-1.27846	0.0038231	0.107423	4930452B06Rik	14	8431192	8666240	-	3279	protein_coding	RIKEN cDNA 4930452B06 gene [Source:MGI Symbol;Acc:MGI:1926154]	-	-
ENSMUSG00000064225	606.568	267.844	367.085	270.886	404.77	115.241	197.329	232.435	171.046	337.267	383.431	210.664	0.862433	0.00382524	0.107423	Paqr9	9	95559657	95568023	+	8367	protein_coding	progestin and adipoQ receptor family member IX [Source:MGI Symbol;Acc:MGI:1922802]	-	-
ENSMUSG00000049538	13.0572	21.1963	47.8807	28.682	67.6227	71.5287	65.4556	100.035	86.5062	71.6475	35.6878	79.0346	-1.14082	0.00383292	0.107508	Adamts16	13	70727802	70841811	-	6836	protein_coding	a disintegrin-like and metallopeptidase (reprolysin type) with thrombospondin type 1 motif, 16 [Source:MGI Symbol;Acc:MGI:2429637]	-	-
ENSMUSG00000021758	37.9847	41.4291	20.9478	45.6787	40.5736	43.712	82.7821	87.2857	74.7099	61.1625	37.3228	69.9304	-0.906345	0.00386006	0.108138	Ddx4	13	112598333	112652475	-	3014	protein_coding	DEAD (Asp-Glu-Ala-Asp) box polypeptide 4 [Source:MGI Symbol;Acc:MGI:102670]	-	-
ENSMUSG00000033276	181.614	79.9678	116.709	165.718	141.042	333.8	263.748	222.628	176.944	173.002	137.01	234.024	-0.774042	0.0038796	0.108554	Stk36	1	74601445	74636894	+	6437	protein_coding	serine/threonine kinase 36 [Source:MGI Symbol;Acc:MGI:1920831]	-	-
ENSMUSG00000029591	135.321	149.338	117.707	206.085	166.159	210.612	225.244	216.743	211.35	346.879	154.922	242.166	-0.645308	0.00392935	0.109812	Ung	5	114130386	114139323	+	5468	protein_coding	uracil DNA glycosylase [Source:MGI Symbol;Acc:MGI:109352]	-	-
ENSMUSG00000035578	28.4885	13.4886	39.9006	19.1213	28.0151	508.648	102.034	108.862	18.6775	13.98	25.8028	150.44	-2.54351	0.00395064	0.110274	Iqcg	16	33012683	33056218	-	6164	protein_coding	IQ motif containing G [Source:MGI Symbol;Acc:MGI:1916957]	-	-
ENSMUSG00000033355	402.401	456.684	512.722	415.358	451.14	208.625	271.448	398.18	281.145	361.732	447.661	304.226	0.557149	0.00398946	0.111223	Rtp4	16	23520291	23614222	+	2131	protein_coding	receptor transporter protein 4 [Source:MGI Symbol;Acc:MGI:1915025]	-	-
ENSMUSG00000073102	2.37404	7.70774	9.97514	0	0	318.899	46.204	93.1701	1.96605	0.87375	4.01139	92.2225	-4.51949	0.00399742	0.11131	Drc1	5	30281388	30366695	+	2683	protein_coding	dynein regulatory complex subunit 1 [Source:MGI Symbol;Acc:MGI:2685906]	-	-
ENSMUSG00000031971	64.0992	53.9542	54.8633	69.0493	54.0982	80.4698	100.109	97.0931	127.793	74.2687	59.2128	95.9467	-0.697413	0.00400773	0.111463	Ccsap	8	123840831	123860209	-	2767	protein_coding	centriole, cilia and spindle associated protein [Source:MGI Symbol;Acc:MGI:1920670]	-	-
ENSMUSG00000021466	2012	1404.74	1745.65	1839.9	1586.24	3619.15	2575.87	2372.41	1785.17	2242.04	1717.7	2518.93	-0.552459	0.00401395	0.111502	Ptch1	13	63508328	63573598	-	14185	protein_coding	patched 1 [Source:MGI Symbol;Acc:MGI:105373]	-	-
ENSMUSG00000078612	11.8702	13.4886	65.8359	24.4328	26.0831	221.54	47.1665	151.034	24.5756	31.455	28.3421	95.1542	-1.74446	0.00402028	0.111543	Fyb2	4	104913456	105016863	+	3136	protein_coding	FYN binding protein 2 [Source:MGI Symbol;Acc:MGI:2685466]	-	-
ENSMUSG00000070034	116.328	94.4199	173.567	89.2329	122.687	141.07	264.71	203.013	278.196	141.547	119.247	205.707	-0.785851	0.0040396	0.111945	Sp110	1	85576899	85598817	-	6781	protein_coding	Sp110 nuclear body protein [Source:MGI Symbol;Acc:MGI:1923364]	-	-
ENSMUSG00000072568	515.168	759.213	503.745	560.892	535.186	1162.34	1032.85	858.146	557.375	767.152	574.841	875.573	-0.606704	0.00405389	0.112194	Fam84b	15	60818994	60853778	-	5926	protein_coding	family with sequence similarity 84, member B [Source:MGI Symbol;Acc:MGI:3026924]	-	-
ENSMUSG00000084170	0	0	0	0	0	2.98036	3.85033	22.557	0	1.7475	0	6.22703	-5.03448	0.00405832	0.112194	Gm11954	11	4002457	4002805	+	349	processed_pseudogene	predicted gene 11954 [Source:MGI Symbol;Acc:MGI:3649565]	-	-
ENSMUSG00000022463	4687.55	3786.43	4075.84	3550.19	3805.23	3791.02	2961.87	2364.56	2778.03	2801.24	3981.05	2939.34	0.437607	0.00409373	0.113038	Srebf2	15	82147181	82205379	+	7184	protein_coding	sterol regulatory element binding factor 2 [Source:MGI Symbol;Acc:MGI:107585]	bHLH	bHLH
ENSMUSG00000036098	745.45	485.588	1029.43	955.004	412.499	661.64	442.788	335.412	241.824	283.095	725.595	392.952	0.884862	0.00410091	0.113101	Myrf	19	10208272	10240748	-	8562	protein_coding	myelin regulatory factor [Source:MGI Symbol;Acc:MGI:2684944]	-	-
ENSMUSG00000021239	0	0	0	1.0623	0	0.993454	4.81291	10.7881	2.94907	6.11625	0.212459	5.13196	-4.18068	0.00416945	0.114854	Vsx2	12	84569762	84595457	+	3327	protein_coding	visual system homeobox 2 [Source:MGI Symbol;Acc:MGI:88401]	HB-other	HB->HB-other
ENSMUSG00000069769	5227.65	5955.2	5969.13	6610.67	4504.64	5120.26	3845.52	2916.72	4482.59	3603.34	5653.46	3993.69	0.50144	0.00419059	0.115299	Msi2	11	88339382	88718513	-	10405	protein_coding	musashi RNA-binding protein 2 [Source:MGI Symbol;Acc:MGI:1923876]	-	-
ENSMUSG00000025738	244.527	206.182	173.567	149.784	136.211	157.959	115.51	73.5554	113.048	82.1325	182.054	108.441	0.747327	0.0042219	0.116022	Fbxl16	17	25809085	25821244	+	3478	protein_coding	F-box and leucine-rich repeat protein 16 [Source:MGI Symbol;Acc:MGI:2448488]	-	-
ENSMUSG00000113383	0	0	0	0	0	7.94763	0	13.7303	1.96605	4.36875	0	5.60255	-4.88237	0.00423138	0.116144	Gm47267	12	103483442	103486681	+	715	lincRNA	predicted gene, 47267 [Source:MGI Symbol;Acc:MGI:6096103]	-	-
ENSMUSG00000110341	16.6183	5.78081	1.99503	2.12459	0.966039	0	0.962582	0	0	0	5.49696	0.192516	4.37651	0.00423676	0.116154	Gm45424	8	85599832	85603131	+	3300	TEC	predicted gene 45424 [Source:MGI Symbol;Acc:MGI:5791260]	-	-
ENSMUSG00000038816	644.553	599.277	590.528	628.879	648.212	1070.94	822.045	951.316	632.085	791.617	622.29	853.601	-0.455962	0.00426613	0.116742	Ctnnal1	4	56810935	56865188	-	7661	protein_coding	catenin (cadherin associated protein), alpha-like 1 [Source:MGI Symbol;Acc:MGI:1859649]	-	-
novel.614	4.74809	2.8904	1.99503	1.0623	4.83019	16.8887	14.4387	17.6533	2.94907	14.8537	3.1052	13.3567	-2.10971	0.00426835	0.116742	-	2	153691510	153693048	+	1539	-	- && sp|Q8VC26|TLCD2_MOUSE TLC domain-containing protein 2 OS=Mus musculus OX=10090 GN=Tlcd2 PE=2 SV=1 && -	-	-
ENSMUSG00000019773	155.5	237.977	169.577	242.204	248.272	223.527	321.503	275.587	447.276	409.789	210.706	335.536	-0.670577	0.00428894	0.117167	Fbxo5	10	5799160	5805600	-	2003	protein_coding	F-box protein 5 [Source:MGI Symbol;Acc:MGI:1914391]	-	-
ENSMUSG00000069733	7.12213	8.67121	3.99006	8.49837	10.6264	39.7382	15.4013	26.4799	12.7793	17.475	7.78164	22.3747	-1.51962	0.00431698	0.117793	Ube2u	4	100478849	100550147	+	1537	protein_coding	ubiquitin-conjugating enzyme E2U (putative) [Source:MGI Symbol;Acc:MGI:3588216]	-	-
ENSMUSG00000020400	1957.4	1904.78	1893.28	1948.25	1951.4	1445.48	1511.25	1332.82	1866.76	1343.83	1931.02	1500.03	0.364458	0.0043276	0.117922	Tnip1	11	54910785	54962917	-	3539	protein_coding	TNFAIP3 interacting protein 1 [Source:MGI Symbol;Acc:MGI:1926194]	-	-
ENSMUSG00000090451	0	0	0	0	0	8.94108	7.70066	20.5955	0	0	0	7.44745	-5.29264	0.00433191	0.117922	Gm6133	18	78349754	78350701	+	948	protein_coding	predicted gene 6133 [Source:MGI Symbol;Acc:MGI:3647029]	-	-
ENSMUSG00000022180	7388.03	4681.49	5947.18	3719.1	5946.94	3283.36	3740.59	4466.28	3207.61	4244.68	5536.55	3788.51	0.547279	0.00433785	0.117945	Slc7a8	14	54722209	54781946	-	5005	protein_coding	solute carrier family 7 (cationic amino acid transporter, y+ system), member 8 [Source:MGI Symbol;Acc:MGI:1355323]	-	-
ENSMUSG00000030862	59.3511	115.616	228.431	80.7345	97.5699	947.755	258.935	208.897	134.674	294.454	116.34	368.943	-1.66431	0.00435766	0.118311	Cpxm2	7	132032687	132154739	-	4622	protein_coding	carboxypeptidase X 2 (M14 family) [Source:MGI Symbol;Acc:MGI:1926006]	-	-
novel.656	4123.72	1910.56	803.996	740.421	696.514	755.025	490.917	652.191	595.713	351.247	1655.04	569.019	1.54026	0.00436158	0.118311	-	2	177250920	177258807	-	7668	-	- && sp|P21414|POL_GALV Gag-Pol polyprotein OS=Gibbon ape leukemia virus OX=11840 GN=pol PE=3 SV=2 && PF01140:Matrix protein (MA), p15	-	-
ENSMUSG00000028681	127.011	93.4564	135.662	89.2329	121.721	155.972	187.704	203.994	166.131	139.8	113.417	170.72	-0.59002	0.0043977	0.119151	Ptch2	4	117096075	117116101	+	5974	protein_coding	patched 2 [Source:MGI Symbol;Acc:MGI:1095405]	-	-
ENSMUSG00000106888	0	0	0.997514	0	1.93208	3.97382	5.77549	4.90369	13.7623	6.11625	0.585918	6.90632	-3.50807	0.00440738	0.119273	Gm42848	5	34221162	34225984	+	2022	antisense	predicted gene 42848 [Source:MGI Symbol;Acc:MGI:5662985]	-	-
ENSMUSG00000032051	10489.7	22943.1	15080.4	19117.1	18152.8	6092.85	10979.2	10351.7	14822	10994.4	17156.6	10648	0.688193	0.00441605	0.119368	Fdx1	9	51943306	51963556	-	3104	protein_coding	ferredoxin 1 [Source:MGI Symbol;Acc:MGI:103224]	-	-
ENSMUSG00000032020	410.71	285.187	276.311	380.302	393.178	469.904	597.764	558.04	370.6	538.23	349.138	506.907	-0.538862	0.00442768	0.119542	Ubash3b	9	41011098	41161697	-	7326	protein_coding	ubiquitin associated and SH3 domain containing, B [Source:MGI Symbol;Acc:MGI:1920078]	-	-
ENSMUSG00000003824	47.4809	70.3332	88.7788	134.912	99.502	78.4828	154.976	164.764	240.841	208.826	88.2013	169.578	-0.942264	0.0044378	0.119675	Syce2	8	84872111	84888221	+	1968	protein_coding	synaptonemal complex central element protein 2 [Source:MGI Symbol;Acc:MGI:1919096]	-	-
ENSMUSG00000023931	13.0572	21.1963	26.9329	10.623	24.151	157.959	29.8401	41.191	15.7284	45.435	19.1921	58.0307	-1.59177	0.00444516	0.119734	Efhb	17	53398889	53463321	-	4290	protein_coding	EF hand domain family, member B [Source:MGI Symbol;Acc:MGI:3045296]	-	-
ENSMUSG00000000861	155.5	180.169	230.426	315.502	321.691	246.377	489.954	402.103	420.735	416.779	240.657	395.189	-0.714951	0.0044601	0.119996	Bcl11a	11	24078056	24174123	+	13175	protein_coding	B cell CLL/lymphoma 11A (zinc finger protein) [Source:MGI Symbol;Acc:MGI:106190]	C2H2	C2H2
ENSMUSG00000054452	14512.5	13647.5	14501.9	13630.3	11680.4	11072	9968.5	7860.62	12551.3	9353.49	13594.5	10161.2	0.419955	0.00448868	0.120625	Aes	10	81559488	81566362	+	3334	protein_coding	amino-terminal enhancer of split [Source:MGI Symbol;Acc:MGI:95806]	-	-
ENSMUSG00000041423	35.6107	24.0867	28.9279	44.6164	71.4869	78.4828	73.1563	78.4591	81.591	71.6475	40.9457	76.6673	-0.903085	0.00449806	0.120736	Paqr6	3	88364584	88368541	+	2429	protein_coding	progestin and adipoQ receptor family member VI [Source:MGI Symbol;Acc:MGI:1916207]	-	-
ENSMUSG00000026429	39.1717	69.3697	25.9354	76.4853	112.061	95.3716	124.173	95.1316	173.012	179.119	64.6045	133.361	-1.04382	0.0045128	0.120991	Ube2t	1	134962565	134974162	+	4836	protein_coding	ubiquitin-conjugating enzyme E2T [Source:MGI Symbol;Acc:MGI:1914446]	-	-
ENSMUSG00000059834	188.737	270.735	239.403	317.627	276.287	268.233	362.894	429.563	402.057	451.728	258.558	382.895	-0.565904	0.00454877	0.121713	Sclt1	3	41626720	41742514	-	7569	protein_coding	sodium channel and clathrin linker 1 [Source:MGI Symbol;Acc:MGI:1914411]	-	-
ENSMUSG00000114550	0	0	0	4.24919	3.86416	17.8822	6.73808	12.7496	16.7114	4.36875	1.62267	11.69	-2.83643	0.00455026	0.121713	AC167192.1	13	66281136	66284067	-	1567	processed_pseudogene	predicted, 46426 [Source:NCBI gene;Acc:108168097]	C2H2	C2H2
novel.549	0	0	0	1.0623	0.966039	1.98691	13.4762	8.82664	0.983025	6.99	0.405667	6.45254	-3.93418	0.0045776	0.122303	-	19	42647828	42649959	+	643	-	- && - && -	-	-
ENSMUSG00000002297	258.771	282.296	268.331	384.551	351.638	300.023	503.431	411.91	543.613	587.16	309.118	469.227	-0.602228	0.00459763	0.122572	Dbf4	5	8396973	8422716	-	8728	protein_coding	DBF4 zinc finger [Source:MGI Symbol;Acc:MGI:1351328]	-	-
ENSMUSG00000025008	205.355	154.155	181.548	157.22	240.544	721.247	237.758	337.374	197.588	267.367	187.764	352.267	-0.907505	0.00459832	0.122572	Tctn3	19	40596446	40612233	-	3273	protein_coding	tectonic family member 3 [Source:MGI Symbol;Acc:MGI:1914840]	-	-
ENSMUSG00000022696	0	2.8904	8.97763	1.0623	4.83019	36.7578	8.66324	37.2681	0.983025	22.7175	3.5521	21.2779	-2.56551	0.00460922	0.122721	Sidt1	16	44240180	44333196	-	5623	protein_coding	SID1 transmembrane family, member 1 [Source:MGI Symbol;Acc:MGI:2443155]	-	-
ENSMUSG00000026609	0	0	0	5.31148	3.86416	20.8625	14.4387	2.94221	13.7623	13.1062	1.83513	13.0224	-2.82047	0.00461821	0.122819	Ush2a	1	188262023	188965041	+	17322	protein_coding	usherin [Source:MGI Symbol;Acc:MGI:1341292]	-	-
ENSMUSG00000037999	149.565	176.315	202.495	271.948	165.193	466.923	311.877	324.624	241.824	221.059	193.103	313.261	-0.697348	0.00465188	0.123572	Arap2	5	62602445	62766159	-	12451	protein_coding	ArfGAP with RhoGAP domain, ankyrin repeat and PH domain 2 [Source:MGI Symbol;Acc:MGI:2684416]	-	-
ENSMUSG00000030695	17310.3	14976.1	15016.6	14462.1	14669.3	12319.8	10320.8	10167.3	13913.7	12582	15286.9	11860.7	0.366076	0.00466905	0.123884	Aldoa	7	126795234	126800751	-	2911	protein_coding	aldolase A, fructose-bisphosphate [Source:MGI Symbol;Acc:MGI:87994]	-	-
ENSMUSG00000028391	41.5458	44.3195	10.9727	35.0558	50.234	120.208	80.8569	53.9406	70.7778	61.1625	36.4256	77.3891	-1.08673	0.00467511	0.123884	Wdr31	4	62448653	62470896	-	4738	protein_coding	WD repeat domain 31 [Source:MGI Symbol;Acc:MGI:1918604]	-	-
ENSMUSG00000039632	4.74809	16.379	10.9727	2.12459	0.966039	250.35	29.8401	36.2873	13.7623	1.7475	7.03807	66.3975	-3.23434	0.00467973	0.123884	Ccdc151	9	21989871	22002634	-	2514	protein_coding	coiled-coil domain containing 151 [Source:MGI Symbol;Acc:MGI:1924859]	-	-
ENSMUSG00000010086	0	7.70774	0	4.24919	1.93208	748.071	101.071	90.2279	0	0	2.7778	187.874	-6.07591	0.00469704	0.1242	Rnf112	11	61448442	61454131	-	3923	protein_coding	ring finger protein 112 [Source:MGI Symbol;Acc:MGI:106611]	-	-
ENSMUSG00000010044	0	8.67121	9.97514	0	2.89812	264.259	29.8401	35.3066	3.9321	4.36875	4.30889	67.5412	-3.96267	0.00473325	0.125014	Zmynd10	9	107547298	107551319	+	2129	protein_coding	zinc finger, MYND domain containing 10 [Source:MGI Symbol;Acc:MGI:2387863]	-	-
ENSMUSG00000042002	0	0	0	0	0	27.8167	0.962582	1.96148	2.94907	0	0	6.73797	-5.14724	0.00473953	0.125037	Foxn4	5	114254164	114273807	-	3371	protein_coding	forkhead box N4 [Source:MGI Symbol;Acc:MGI:2151057]	-	-
ENSMUSG00000104724	17.8053	4.81734	3.99006	2.12459	1.93208	0.993454	0	0	0	0.87375	6.13388	0.373441	3.95642	0.00474913	0.125147	Gm43162	3	138976312	138978081	-	1770	TEC	predicted gene 43162 [Source:MGI Symbol;Acc:MGI:5663299]	-	-
ENSMUSG00000033088	1362.7	1295.86	1108.24	1000.68	1214.31	975.572	813.382	857.165	970.245	979.473	1196.36	919.167	0.380056	0.00475804	0.125239	Triobp	15	78947724	79005869	+	12302	protein_coding	TRIO and F-actin binding protein [Source:MGI Symbol;Acc:MGI:1349410]	-	-
ENSMUSG00000061816	11.8702	3.85387	16.9577	5.31148	26.0831	27.8167	31.7652	39.2295	48.1682	27.0862	12.8153	34.8132	-1.43706	0.00478603	0.125832	Myl1	1	66924295	66945404	-	2074	protein_coding	myosin, light polypeptide 1 [Source:MGI Symbol;Acc:MGI:97269]	-	-
ENSMUSG00000101342	0	0	0	0	0	0	7.70066	1.96148	7.8642	8.7375	0	5.25277	-4.79223	0.00481832	0.126295	Gm28078	7	37119993	37128692	-	874	lincRNA	predicted gene 28078 [Source:MGI Symbol;Acc:MGI:5578784]	-	-
ENSMUSG00000107750	16.6183	2.8904	5.98509	3.18689	2.89812	0	1.92516	0	0	0	6.31576	0.385033	4.00038	0.00482249	0.126295	Gm44013	6	140620162	140622423	-	2262	TEC	predicted gene, 44013 [Source:MGI Symbol;Acc:MGI:5690405]	-	-
ENSMUSG00000075408	10.6832	43.3561	32.918	45.6787	60.8605	44.7054	49.0917	116.708	115.014	127.567	38.6993	90.6173	-1.22345	0.004825	0.126295	6030408B16Rik	15	101293212	101297426	+	1967	protein_coding	RIKEN cDNA 6030408B16 gene [Source:MGI Symbol;Acc:MGI:1924967]	-	-
ENSMUSG00000024905	4.74809	7.70774	0	6.37378	11.5925	20.8625	9.62582	26.4799	29.4907	20.97	6.08442	21.4858	-1.8134	0.00482553	0.126295	Tesmin	19	3388857	3407823	+	3912	protein_coding	testis expressed metallothionein like [Source:MGI Symbol;Acc:MGI:1340029]	CPP	CPP
ENSMUSG00000025038	15.4313	3.85387	6.9826	5.31148	9.66039	37.7512	26.9523	34.3258	8.84722	16.6012	8.24793	24.8956	-1.60471	0.0048311	0.126297	Efhc2	X	17132049	17319368	-	2554	protein_coding	EF-hand domain (C-terminal) containing 2 [Source:MGI Symbol;Acc:MGI:1921655]	-	-
ENSMUSG00000028373	13.0572	19.2694	42.8931	8.49837	10.6264	196.704	35.6155	50.9984	10.8133	40.1925	18.8689	66.8647	-1.82223	0.00484163	0.126297	Astn2	4	65380803	66404611	-	4959	protein_coding	astrotactin 2 [Source:MGI Symbol;Acc:MGI:1889277]	-	-
ENSMUSG00000026104	1299.79	1180.25	1240.91	1177.02	1328.3	628.856	778.729	1169.04	913.23	970.736	1245.25	892.118	0.481005	0.004842	0.126297	Stat1	1	52119440	52161865	+	7105	protein_coding	signal transducer and activator of transcription 1 [Source:MGI Symbol;Acc:MGI:103063]	-	-
ENSMUSG00000039533	1353.21	1204.34	1079.31	1405.42	612.469	678.529	724.825	540.387	914.213	778.511	1130.95	727.293	0.636602	0.00486215	0.12654	Mmd2	5	142562358	142608800	-	5193	protein_coding	monocyte to macrophage differentiation-associated 2 [Source:MGI Symbol;Acc:MGI:1922354]	-	-
ENSMUSG00000031898	0	0	0	0	0.966039	0	10.5884	4.90369	3.9321	9.61124	0.193208	5.80709	-4.36043	0.00486228	0.12654	Dpep3	8	105973513	105979429	-	1698	protein_coding	dipeptidase 3 [Source:MGI Symbol;Acc:MGI:1919104]	-	-
ENSMUSG00000034612	7567.27	6094.9	5038.44	4389.41	5596.26	4213.24	2757.8	3609.12	4762.75	4437.77	5737.26	3956.14	0.536208	0.00488005	0.126747	Chst11	10	82985498	83195900	+	5527	protein_coding	carbohydrate sulfotransferase 11 [Source:MGI Symbol;Acc:MGI:1927166]	-	-
ENSMUSG00000056758	34.4236	30.831	22.9428	30.8066	16.4227	63.581	43.3162	31.3836	61.9305	65.5312	27.0853	53.1485	-0.977887	0.00488121	0.126747	Hmga2	10	120361275	120476469	-	6772	protein_coding	high mobility group AT-hook 2 [Source:MGI Symbol;Acc:MGI:101761]	-	-
ENSMUSG00000007440	0	14.452	4.98757	11.6853	2.89812	0.993454	0	0	0	0.87375	6.80459	0.373441	4.12155	0.00490123	0.127056	Pcdha11	18	37005203	37187657	+	5359	protein_coding	protocadherin alpha 11 [Source:MGI Symbol;Acc:MGI:1298372]	-	-
ENSMUSG00000024863	0	0	0	12.7476	7.72831	3.97382	28.8775	18.634	33.4228	53.2987	4.09517	27.6414	-2.7536	0.00490414	0.127056	Mbl2	19	30232928	30239685	+	1101	protein_coding	mannose-binding lectin (protein C) 2 [Source:MGI Symbol;Acc:MGI:96924]	-	-
ENSMUSG00000043445	673.042	637.816	599.506	597.011	653.042	590.112	371.557	450.159	468.903	478.815	632.083	471.909	0.421605	0.00492415	0.127432	Pgp	17	24470473	24471591	+	1027	protein_coding	phosphoglycolate phosphatase [Source:MGI Symbol;Acc:MGI:1914328]	-	-
ENSMUSG00000030357	4001.45	4620.79	4267.37	3752.03	5060.11	3738.37	3159.2	3126.59	3414.04	3562.28	4340.35	3400.1	0.352334	0.00494976	0.12795	Fkbp4	6	128429735	128438677	-	2795	protein_coding	FK506 binding protein 4 [Source:MGI Symbol;Acc:MGI:95543]	-	-
ENSMUSG00000055078	0	0	0	0	0	1.98691	1.92516	4.90369	13.7623	0.87375	0	4.69037	-4.6244	0.00496511	0.12795	Gabra5	7	57407672	57510059	-	2974	protein_coding	gamma-aminobutyric acid (GABA) A receptor, subunit alpha 5 [Source:MGI Symbol;Acc:MGI:95617]	-	-
ENSMUSG00000051747	10.6832	11.5616	5.98509	15.9344	17.3887	18.8756	20.2142	60.8058	37.3549	23.5912	12.3106	32.1684	-1.38349	0.00497712	0.12795	Ttn	2	76703980	76982547	-	116825	protein_coding	titin [Source:MGI Symbol;Acc:MGI:98864]	-	-
ENSMUSG00000047021	0	10.5981	10.9727	3.18689	0	606.007	168.452	107.881	1.96605	0	4.95154	176.861	-5.15546	0.00497795	0.12795	Cfap65	1	74902071	74935599	-	7817	protein_coding	cilia and flagella associated protein 65 [Source:MGI Symbol;Acc:MGI:2444274]	-	-
ENSMUSG00000031310	1832.76	1499.16	1546.15	2005.62	2175.52	2181.62	2256.29	2150.76	2863.55	3062.49	1811.84	2502.94	-0.466294	0.00498066	0.12795	Zmym3	X	101404384	101420849	-	8021	protein_coding	zinc finger, MYM-type 3 [Source:MGI Symbol;Acc:MGI:1927231]	-	-
ENSMUSG00000043003	3.56107	3.85387	17.9553	0	2.89812	235.449	44.2788	49.0369	3.9321	2.62125	5.65366	67.0635	-3.56523	0.00498176	0.12795	Rasef	4	73714579	73790994	-	5746	protein_coding	RAS and EF hand domain containing [Source:MGI Symbol;Acc:MGI:2448565]	-	-
ENSMUSG00000018554	0	4.81734	19.9503	62.6755	22.2189	54.64	120.323	198.109	132.708	116.209	21.9324	124.398	-2.50326	0.00498297	0.12795	Ybx2	11	69935796	69941605	+	1885	protein_coding	Y box protein 2 [Source:MGI Symbol;Acc:MGI:1096372]	CSD	CSD
ENSMUSG00000038347	26.1145	21.1963	26.9329	30.8066	47.3359	42.7185	69.3059	75.5168	44.2361	59.415	30.4772	58.2385	-0.932422	0.005026	0.128911	Tcte2	17	13712444	13761825	-	4380	protein_coding	t-complex-associated testis expressed 2 [Source:MGI Symbol;Acc:MGI:98641]	-	-
ENSMUSG00000032179	1.18702	0.963468	1.99503	3.18689	5.79623	6.95418	15.4013	12.7496	17.6944	6.11625	2.62573	11.7832	-2.15121	0.00504837	0.129341	Bmp5	9	75775364	75900310	+	4025	protein_coding	bone morphogenetic protein 5 [Source:MGI Symbol;Acc:MGI:88181]	-	-
novel.470	2.37404	1.92694	10.9727	10.623	3.86416	33.7774	18.2891	19.6148	11.7963	16.6012	5.95215	20.0158	-1.7465	0.00505932	0.129478	-	17	88662753	88664513	-	862	-	- && - && -	-	-
ENSMUSG00000084847	0	0.963468	0	0	1.93208	1.98691	6.73808	22.557	6.88117	1.7475	0.579109	7.98213	-3.72733	0.00506955	0.129552	Gm15507	9	59957511	59961801	-	1246	lincRNA	predicted gene 15507 [Source:MGI Symbol;Acc:MGI:3782955]	-	-
ENSMUSG00000114753	0	1.92694	0	0	0.966039	29.8036	17.3265	12.7496	0	0	0.578595	11.9759	-4.32486	0.00507342	0.129552	Gm34059	14	26315011	26324954	-	5711	lincRNA	predicted gene, 34059 [Source:MGI Symbol;Acc:MGI:5593218]	-	-
ENSMUSG00000022805	13.0572	26.9771	33.9155	3.18689	8.69435	358.637	60.6427	68.6517	16.7114	17.475	17.1662	104.424	-2.60286	0.00517322	0.131874	Maats1	16	38297754	38342143	-	4527	protein_coding	MYCBP-associated, testis expressed 1 [Source:MGI Symbol;Acc:MGI:2443598]	-	-
ENSMUSG00000055447	3431.68	2885.59	2476.83	2575.01	2262.46	1941.21	1964.63	2240.01	2221.64	1981.66	2726.31	2069.83	0.397254	0.00517577	0.131874	Cd47	16	49800533	49915010	+	6276	protein_coding	CD47 antigen (Rh-related antigen, integrin-associated signal transducer) [Source:MGI Symbol;Acc:MGI:96617]	-	-
ENSMUSG00000027580	1171.59	849.779	822.949	706.427	929.329	648.725	579.475	550.194	781.505	654.438	896.015	642.867	0.478594	0.00518937	0.131947	Helz2	2	181227615	181242027	-	11529	protein_coding	helicase with zinc finger 2, transcriptional coactivator [Source:MGI Symbol;Acc:MGI:2385169]	-	-
ENSMUSG00000027353	125.824	157.045	177.558	176.341	169.057	198.691	231.02	170.648	318.5	344.257	161.165	252.623	-0.648193	0.00520517	0.131947	Mcm8	2	132816141	132844197	+	3718	protein_coding	minichromosome maintenance 8 homologous recombination repair factor [Source:MGI Symbol;Acc:MGI:1913884]	-	-
ENSMUSG00000015484	60.5381	37.5753	44.8881	54.1771	95.6379	35.7643	43.3162	22.557	20.6435	20.0962	58.5633	28.4755	1.04193	0.00520668	0.131947	Fam163a	1	156075966	156205026	-	3882	protein_coding	family with sequence similarity 163, member A [Source:MGI Symbol;Acc:MGI:3618859]	-	-
ENSMUSG00000033022	127.011	131.032	147.632	291.069	64.7246	472.884	311.877	268.722	249.688	186.982	152.294	298.031	-0.968948	0.00520718	0.131947	Cdo1	18	46713205	46728342	-	1530	protein_coding	cysteine dioxygenase 1, cytosolic [Source:MGI Symbol;Acc:MGI:105925]	-	-
ENSMUSG00000036006	99.7099	91.5295	133.667	92.4198	91.7737	343.735	174.227	383.469	75.6929	103.976	101.82	216.22	-1.08594	0.00520724	0.131947	Ripor2	13	24582189	24733816	+	11662	protein_coding	RHO family interacting cell polarization regulator 2 [Source:MGI Symbol;Acc:MGI:2444879]	-	-
ENSMUSG00000033634	8.30916	2.8904	0.997514	9.56067	2.89812	23.8429	16.3639	20.5955	13.7623	10.485	4.93117	17.0099	-1.80654	0.00521677	0.132013	Nat8f2	6	85865422	85869158	-	3301	protein_coding	N-acetyltransferase 8 (GCN5-related) family member 2 [Source:MGI Symbol;Acc:MGI:2136446]	GNAT	GNAT
ENSMUSG00000029053	46.2939	33.7214	61.8459	78.6099	38.6416	334.794	84.7072	115.727	61.9305	48.93	51.8225	129.218	-1.31805	0.00522129	0.132013	Prkcz	4	155260129	155361361	-	6318	protein_coding	protein kinase C, zeta [Source:MGI Symbol;Acc:MGI:97602]	-	-
ENSMUSG00000030889	42.7328	25.0502	55.8608	37.1804	37.6755	553.354	157.864	142.207	37.3549	19.2225	39.6999	182	-2.19671	0.00523135	0.132123	Vwa3a	7	120739318	120805742	+	7205	protein_coding	von Willebrand factor A domain containing 3A [Source:MGI Symbol;Acc:MGI:3041229]	-	-
ENSMUSG00000031294	0	0	0	0	0	0	0.962582	8.82664	7.8642	9.61124	0	5.45293	-4.84576	0.00526018	0.132706	D630029K05Rik	10	116964707	116969105	+	2717	lincRNA	RIKEN cDNA D630029K05 gene [Source:MGI Symbol;Acc:MGI:2143561]	-	-
novel.750	45.1068	64.5524	57.8558	88.1706	77.2831	53.6465	117.435	164.764	225.113	99.6074	66.5937	132.113	-0.98676	0.00528748	0.133195	-	4	11175969	11182824	-	5653	-	- && sp|P21414|POL_GALV Gag-Pol polyprotein OS=Gibbon ape leukemia virus OX=11840 GN=pol PE=3 SV=2 && PF02093:Gag P30 core shell protein	-	-
ENSMUSG00000086103	0	3.85387	0	0	3.86416	1.98691	17.3265	11.7689	13.7623	13.1062	1.54361	11.5902	-2.86921	0.0052936	0.133195	Gm11832	4	11611139	11615007	-	432	antisense	predicted gene 11832 [Source:MGI Symbol;Acc:MGI:3650310]	-	-
ENSMUSG00000037217	161.435	96.3468	98.7539	78.6099	116.891	30.7971	36.5781	107.881	56.0324	47.1825	110.407	55.6943	0.986542	0.00529686	0.133195	Syn1	X	20860511	20921004	-	3299	protein_coding	synapsin I [Source:MGI Symbol;Acc:MGI:98460]	-	-
ENSMUSG00000048329	0	5.78081	5.98509	5.31148	9.66039	102.326	13.4762	39.2295	1.96605	3.495	5.34755	32.0985	-2.57395	0.00538304	0.135141	Mfsd6l	11	68556186	68558245	+	2060	protein_coding	major facilitator superfamily domain containing 6-like [Source:MGI Symbol;Acc:MGI:2384904]	-	-
ENSMUSG00000057596	302.691	361.301	330.177	249.64	269.525	204.651	195.404	257.934	234.943	154.654	302.667	209.517	0.531891	0.00538595	0.135141	Trim30d	7	104470014	104507849	-	3758	protein_coding	tripartite motif-containing 30D [Source:MGI Symbol;Acc:MGI:3035181]	-	-
ENSMUSG00000072889	466.5	485.588	482.797	571.515	708.107	561.301	845.147	842.454	732.353	856.275	542.901	767.506	-0.499266	0.00540287	0.13541	Nfxl1	5	72513301	72559684	-	8307	protein_coding	nuclear transcription factor, X-box binding-like 1 [Source:MGI Symbol;Acc:MGI:1923646]	NF-X1	NF-X1
ENSMUSG00000003309	22.5534	11.5616	76.8086	11.6853	20.2868	372.545	58.7175	142.207	37.3549	46.3087	28.5791	131.427	-2.20028	0.00540843	0.13541	Ap1m2	9	21294275	21312337	-	3140	protein_coding	adaptor protein complex AP-1, mu 2 subunit [Source:MGI Symbol;Acc:MGI:1336974]	-	-
ENSMUSG00000029755	1.18702	0	1.99503	0	2.89812	48.6792	1.92516	18.634	0	3.495	1.21603	14.5467	-3.57103	0.00545134	0.136337	Dlx5	6	6877805	6882085	-	2263	protein_coding	distal-less homeobox 5 [Source:MGI Symbol;Acc:MGI:101926]	HB-other	HB->HB-other
ENSMUSG00000110018	0	0	0.997514	0	0	3.97382	14.4387	5.88443	4.91512	0	0.199503	5.84242	-4.36484	0.00547171	0.136663	5430437J10Rik	15	5496266	5594984	+	2001	transcribed_processed_pseudogene	RIKEN cDNA 5430437J10 gene [Source:MGI Symbol;Acc:MGI:1918682]	-	-
ENSMUSG00000030748	2181.75	2060.86	2329.2	1541.39	1783.31	1855.77	938.518	1617.24	1112.78	1101.8	1979.3	1325.22	0.578854	0.00547622	0.136663	Il4ra	7	125552120	125579474	+	6002	protein_coding	interleukin 4 receptor, alpha [Source:MGI Symbol;Acc:MGI:105367]	-	-
ENSMUSG00000031831	13.0572	5.78081	1.99503	2.12459	1.93208	253.331	30.8026	49.0369	2.94907	0	4.97795	67.2239	-3.76217	0.0055131	0.137344	Dnaaf1	8	119575235	119598454	+	2821	protein_coding	dynein, axonemal assembly factor 1 [Source:MGI Symbol;Acc:MGI:1915520]	-	-
ENSMUSG00000000197	17.8053	41.4291	25.9354	26.5574	31.8793	39.7382	45.2414	102.978	41.287	69.0262	28.7213	59.6541	-1.04984	0.00552587	0.137344	Nalcn	14	123276634	123627144	-	14715	protein_coding	sodium leak channel, non-selective [Source:MGI Symbol;Acc:MGI:2444306]	-	-
ENSMUSG00000038893	264.706	229.305	227.433	269.823	305.268	339.761	324.39	373.661	355.855	329.404	259.307	344.614	-0.410334	0.00552664	0.137344	Fam117a	11	95337018	95381872	+	3029	protein_coding	family with sequence similarity 117, member A [Source:MGI Symbol;Acc:MGI:2144564]	-	-
ENSMUSG00000028836	561.462	392.131	405.988	313.377	368.061	234.455	292.625	223.608	224.13	373.965	408.204	269.757	0.595995	0.00552732	0.137344	Slc30a2	4	134343181	134354484	+	3564	protein_coding	solute carrier family 30 (zinc transporter), member 2 [Source:MGI Symbol;Acc:MGI:106637]	-	-
ENSMUSG00000059857	54.603	27.9406	43.8906	67.987	100.468	72.5221	183.853	228.512	47.1852	141.547	58.9778	134.724	-1.19178	0.00556191	0.137987	Ntng1	3	109780040	110144011	-	8243	protein_coding	netrin G1 [Source:MGI Symbol;Acc:MGI:1934028]	-	-
ENSMUSG00000112649	0	0	0	0	0	11.9214	2.88775	4.90369	5.89815	0	0	5.12221	-4.7511	0.00556926	0.137987	Gm47647	12	58923194	58924459	-	1266	transcribed_processed_pseudogene	predicted gene, 47647 [Source:MGI Symbol;Acc:MGI:6096728]	-	-
ENSMUSG00000006362	873.648	669.61	806.989	823.28	1061.68	715.287	543.859	486.446	669.44	640.458	847.041	611.098	0.470985	0.00557112	0.137987	Cbfa2t3	8	122625141	122699109	-	8373	protein_coding	core-binding factor, runt domain, alpha subunit 2, translocated to, 3 (human) [Source:MGI Symbol;Acc:MGI:1338013]	-	-
ENSMUSG00000071648	211.29	100.201	145.637	116.853	167.125	106.3	78.9318	49.0369	89.4552	106.597	148.221	86.0642	0.782011	0.0055773	0.137992	Rom1	19	8927382	8929356	-	1526	protein_coding	rod outer segment membrane protein 1 [Source:MGI Symbol;Acc:MGI:97998]	-	-
ENSMUSG00000031613	370.351	361.301	551.625	653.312	746.748	569.249	1101.19	1362.25	555.409	1060.73	536.667	929.766	-0.792668	0.00559782	0.138351	Hpgd	8	56294585	56321043	+	1683	protein_coding	hydroxyprostaglandin dehydrogenase 15 (NAD) [Source:MGI Symbol;Acc:MGI:108085]	-	-
ENSMUSG00000026971	5.93511	0.963468	8.97763	3.18689	1.93208	103.319	14.4387	14.7111	0	7.86375	4.19903	28.0665	-2.74524	0.00560765	0.138356	Itgb6	2	60598292	60722643	-	7111	protein_coding	integrin beta 6 [Source:MGI Symbol;Acc:MGI:96615]	-	-
ENSMUSG00000110329	0	0	0	1.0623	1.93208	0	8.66324	5.88443	6.88117	21.8437	0.598875	8.65452	-3.8318	0.00561002	0.138356	Gm45304	8	31598979	31663828	-	3286	lincRNA	predicted gene 45304 [Source:MGI Symbol;Acc:MGI:5791140]	-	-
ENSMUSG00000109849	8.30916	0	0	1.0623	0	3.97382	21.1768	17.6533	9.83025	14.8537	1.87429	13.4976	-2.9181	0.00563971	0.138898	Gm45645	14	27838165	27876217	-	1963	antisense	predicted gene 45645 [Source:MGI Symbol;Acc:MGI:5791481]	-	-
ENSMUSG00000053279	78329.2	47685.9	72012.5	45031.8	58518.8	23685.9	38448.4	46845.9	31288.7	53115.2	60315.6	38676.8	0.641053	0.00564403	0.138898	Aldh1a1	19	20492715	20643462	+	4934	protein_coding	aldehyde dehydrogenase family 1, subfamily A1 [Source:MGI Symbol;Acc:MGI:1353450]	-	-
ENSMUSG00000029413	286.072	378.643	520.702	557.706	318.793	1031.21	655.519	754.188	483.648	469.203	412.383	678.753	-0.718476	0.00565387	0.138992	Naaa	5	92257659	92278170	-	3721	protein_coding	N-acylethanolamine acid amidase [Source:MGI Symbol;Acc:MGI:1914361]	-	-
ENSMUSG00000039349	1655.9	986.591	996.517	1046.36	1596.86	2129.96	2415.12	1671.18	1452.91	1713.42	1256.45	1876.52	-0.578905	0.00567194	0.139288	C130074G19Rik	1	184871926	184883218	-	3035	protein_coding	RIKEN cDNA C130074G19 gene [Source:MGI Symbol;Acc:MGI:2444831]	-	-
ENSMUSG00000036223	34.4236	36.6118	22.9428	71.1739	62.7925	70.5352	69.3059	76.4976	98.3025	128.441	45.5889	88.6165	-0.959378	0.00570471	0.139944	Ska1	18	74195299	74207818	-	2669	protein_coding	spindle and kinetochore associated complex subunit 1 [Source:MGI Symbol;Acc:MGI:1913718]	-	-
ENSMUSG00000028037	300.317	237.013	404.991	175.279	158.43	190.743	112.622	179.475	137.623	127.567	255.206	149.606	0.770636	0.00571398	0.140023	Ifi44	3	151730922	151749960	-	6129	protein_coding	interferon-induced protein 44 [Source:MGI Symbol;Acc:MGI:2443016]	-	-
ENSMUSG00000029687	299.13	374.789	319.205	580.014	441.48	474.871	708.461	530.579	672.389	622.983	402.923	601.857	-0.578722	0.00573921	0.140492	Ezh2	6	47530139	47595341	-	6678	protein_coding	enhancer of zeste 2 polycomb repressive complex 2 subunit [Source:MGI Symbol;Acc:MGI:107940]	SET	SET
ENSMUSG00000040040	335.927	304.456	332.172	386.676	325.555	904.043	491.88	552.156	412.87	331.151	336.957	538.42	-0.675941	0.00574734	0.140542	Ift88	14	57424062	57517936	+	4628	protein_coding	intraflagellar transport 88 [Source:MGI Symbol;Acc:MGI:98715]	-	-
ENSMUSG00000066477	4.74809	1.92694	0.997514	8.49837	3.86416	29.8036	21.1768	1.96148	19.6605	13.98	4.00701	17.3165	-2.12214	0.00576242	0.140762	Gm16551	9	74847983	74860134	+	3708	processed_transcript	predicted gene 16551 [Source:MGI Symbol;Acc:MGI:4414971]	-	-
ENSMUSG00000055403	73.5954	17.3424	23.9403	45.6787	24.151	71.5287	77.9692	101.016	75.6929	59.415	36.9416	77.1243	-1.07104	0.00576854	0.140762	4933427D06Rik	6	88950683	89110031	+	2914	lincRNA	RIKEN cDNA 4933427D06 gene [Source:MGI Symbol;Acc:MGI:3026922]	-	-
ENSMUSG00000002668	43.9198	29.8675	40.8981	41.4296	52.1661	68.5483	58.7175	62.7672	87.4892	69.0262	41.6562	69.3097	-0.735204	0.00580017	0.141385	Dennd1c	17	57065905	57078514	-	5109	protein_coding	DENN/MADD domain containing 1C [Source:MGI Symbol;Acc:MGI:1918035]	-	-
ENSMUSG00000029030	2732.53	2625.45	2899.77	2393.35	2479.82	2062.41	1940.57	2395.94	1968.02	2157.29	2626.18	2104.84	0.319216	0.00582548	0.141729	Tprgl	4	154157485	154160666	-	2242	protein_coding	transformation related protein 63 regulated like [Source:MGI Symbol;Acc:MGI:1915058]	-	-
ENSMUSG00000021730	115.141	95.3833	209.478	167.843	530.355	43.712	152.088	86.305	65.8626	131.062	223.64	95.806	1.22299	0.0058266	0.141729	Hcn1	13	117602320	117987418	+	18120	protein_coding	hyperpolarization-activated, cyclic nucleotide-gated K+ 1 [Source:MGI Symbol;Acc:MGI:1096392]	-	-
ENSMUSG00000025468	0	4.81734	8.97763	1.0623	7.72831	290.089	23.102	95.1316	3.9321	0	4.51712	82.4508	-4.18406	0.00584025	0.141912	Caly	7	140069880	140082548	-	2401	protein_coding	calcyon neuron-specific vesicular protein [Source:MGI Symbol;Acc:MGI:1915816]	-	-
ENSMUSG00000016526	64.0992	83.8217	122.694	81.7968	105.298	272.206	145.35	183.398	104.201	110.966	91.542	163.224	-0.831799	0.00587736	0.142555	Dyrk3	1	131127455	131138340	-	3178	protein_coding	dual-specificity tyrosine-(Y)-phosphorylation regulated kinase 3 [Source:MGI Symbol;Acc:MGI:1330300]	-	-
novel.94	0	0	4.98757	1.0623	2.89812	11.9214	7.70066	9.80738	6.88117	14.8537	1.7896	10.2329	-2.49251	0.00587908	0.142555	-	10	22055029	22058588	-	470	-	- && - && -	-	-
ENSMUSG00000091387	880.77	650.341	678.31	530.086	555.472	475.864	423.536	322.663	411.887	599.392	658.996	446.669	0.560112	0.0058907	0.142681	Gcnt4	13	96924689	96950906	+	5087	protein_coding	glucosaminyl (N-acetyl) transferase 4, core 2 (beta-1,6-N-acetylglucosaminyltransferase) [Source:MGI Symbol;Acc:MGI:2684919]	-	-
ENSMUSG00000056458	11.8702	54.9177	30.9229	48.8656	34.7774	102.326	59.6801	77.4783	75.6929	55.0462	36.2708	74.0447	-1.02327	0.00591206	0.142681	Mok	12	110807798	110840939	-	3405	protein_coding	MOK protein kinase [Source:MGI Symbol;Acc:MGI:1336881]	-	-
ENSMUSG00000028125	112.767	68.4062	107.732	105.167	243.442	306.977	218.506	199.09	162.199	280.474	127.503	233.449	-0.871909	0.00591228	0.142681	Abca4	3	122044443	122180123	+	12022	protein_coding	ATP-binding cassette, sub-family A (ABC1), member 4 [Source:MGI Symbol;Acc:MGI:109424]	-	-
novel.928	0	0	0	0	0.966039	0	3.85033	10.7881	1.96605	13.1062	0.193208	5.94215	-4.39421	0.0059123	0.142681	-	7	122190838	122191551	+	514	-	- && - && -	-	-
ENSMUSG00000035095	15.4313	0.963468	28.9279	19.1213	6.76227	172.861	29.8401	53.9406	18.6775	13.1062	14.2413	57.6851	-2.0198	0.00591516	0.142681	Fam167a	14	63436394	63465498	+	4274	protein_coding	family with sequence similarity 167, member A [Source:MGI Symbol;Acc:MGI:3606565]	-	-
ENSMUSG00000024079	1512.27	902.77	1179.06	765.916	835.624	911.991	645.893	631.595	645.847	648.322	1039.13	696.73	0.576378	0.00595367	0.143369	Eif2ak2	17	78852564	78882573	-	5113	protein_coding	eukaryotic translation initiation factor 2-alpha kinase 2 [Source:MGI Symbol;Acc:MGI:1353449]	-	-
ENSMUSG00000025871	2334.87	2598.47	2576.58	2869.26	2198.7	2328.66	1985.81	1905.57	1701.62	1826.14	2515.58	1949.56	0.367811	0.00595609	0.143369	4833439L19Rik	13	54551218	54565435	-	3187	protein_coding	RIKEN cDNA 4833439L19 gene [Source:MGI Symbol;Acc:MGI:1921162]	-	-
ENSMUSG00000036492	4.74809	5.78081	5.98509	5.31148	3.86416	23.8429	11.551	34.3258	7.8642	8.7375	5.13792	17.2643	-1.74517	0.00596768	0.143498	Rnf39	17	36942918	36947986	+	1795	protein_coding	ring finger protein 39 [Source:MGI Symbol;Acc:MGI:2156378]	-	-
ENSMUSG00000041773	1663.02	1421.12	2062.86	2607.94	3792.67	1574.62	1072.32	1182.77	1410.64	1857.59	2309.52	1419.59	0.702132	0.00597947	0.143548	Enc1	13	97241105	97253034	+	4737	protein_coding	ectodermal-neural cortex 1 [Source:MGI Symbol;Acc:MGI:109610]	-	-
novel.962	4547.48	2739.14	1536.17	1171.71	1796.83	677.535	1165.69	1528.97	1456.84	1507.22	2358.27	1267.25	0.895842	0.00598835	0.143548	-	8	33713743	33718680	+	4938	-	- && sp|P31792|POL_FENV1 Pol polyprotein (Fragment) OS=Feline endogenous virus ECE1 OX=11766 GN=pol PE=3 SV=1 && PF01140:Matrix protein (MA), p15	-	-
ENSMUSG00000074991	0	0	0	0	0	0	7.70066	10.7881	3.9321	2.62125	0	5.00843	-4.72093	0.00598844	0.143548	Gabrr3	16	59407332	59464504	+	4271	protein_coding	gamma-aminobutyric acid (GABA) receptor, rho 3 [Source:MGI Symbol;Acc:MGI:3588203]	-	-
ENSMUSG00000057715	7.12213	4.81734	2.99254	13.8099	6.76227	99.3454	18.2891	14.7111	6.88117	9.61124	7.10083	29.7676	-2.07013	0.00599885	0.143649	A830018L16Rik	1	11414105	11975901	+	9183	protein_coding	RIKEN cDNA A830018L16 gene [Source:MGI Symbol;Acc:MGI:2444149]	-	-
ENSMUSG00000039047	1975.2	1719.79	1718.72	1525.46	1546.63	1457.4	1281.2	1317.13	1352.64	1366.54	1697.16	1354.98	0.32459	0.00601114	0.143794	Pigk	3	152714100	152980408	+	9495	protein_coding	phosphatidylinositol glycan anchor biosynthesis, class K [Source:MGI Symbol;Acc:MGI:1913863]	-	-
ENSMUSG00000060416	7.12213	23.1232	12.9677	33.9935	34.7774	35.7643	69.3059	63.748	31.4568	62.0362	22.3968	52.4622	-1.22305	0.00604151	0.144235	Gm839	6	89211165	89216237	-	1843	lincRNA	predicted gene 839 [Source:MGI Symbol;Acc:MGI:2685685]	-	-
ENSMUSG00000049154	24.9275	7.70774	7.98011	21.2459	20.2868	232.468	47.1665	63.748	6.88117	4.36875	16.4296	70.9265	-2.11227	0.00604207	0.144235	Fam183b	11	58792797	58801960	-	567	protein_coding	family with sequence similarity 183, member B [Source:MGI Symbol;Acc:MGI:1922679]	-	-
ENSMUSG00000113544	0	0	0	0	0.966039	7.94763	1.92516	0.980738	6.88117	6.11625	0.193208	4.77019	-4.07452	0.00605314	0.14435	4833405L11Rik	12	29104487	29106850	-	2258	lincRNA	RIKEN cDNA 4833405L11 gene [Source:MGI Symbol;Acc:MGI:1924112]	-	-
ENSMUSG00000068180	0	8.67121	2.99254	2.12459	9.66039	32.784	31.7652	6.86517	12.7793	14.8537	4.68975	19.8095	-2.05559	0.00608223	0.144497	AY512915	6	95255726	95333993	-	5735	processed_transcript	cDNA sequence AY512915 [Source:MGI Symbol;Acc:MGI:3041245]	-	-
ENSMUSG00000029001	204.168	168.607	180.55	168.905	204.8	133.123	113.585	77.4783	171.046	107.471	185.406	120.541	0.621406	0.00608311	0.144497	Fbxo44	4	148152800	148160482	-	3024	protein_coding	F-box protein 44 [Source:MGI Symbol;Acc:MGI:1354744]	-	-
ENSMUSG00000028599	2026.25	1525.17	1263.85	1224.83	768.967	1036.17	918.304	830.685	800.182	878.118	1361.81	892.692	0.608967	0.00608466	0.144497	Tnfrsf1b	4	145213463	145246870	-	3818	protein_coding	tumor necrosis factor receptor superfamily, member 1b [Source:MGI Symbol;Acc:MGI:1314883]	-	-
ENSMUSG00000060176	41.5458	30.831	34.913	19.1213	29.9472	191.737	71.2311	93.1701	25.5586	26.2125	31.2717	81.5818	-1.38342	0.00608683	0.144497	Kif27	13	58287502	58359122	-	5215	protein_coding	kinesin family member 27 [Source:MGI Symbol;Acc:MGI:1922300]	-	-
ENSMUSG00000044288	29.6756	20.2328	28.9279	45.6787	9.66039	76.4959	44.2788	57.8636	75.6929	36.6975	26.8351	58.2057	-1.12058	0.00609061	0.144497	Cnr1	4	33924593	33948831	+	6444	protein_coding	cannabinoid receptor 1 (brain) [Source:MGI Symbol;Acc:MGI:104615]	-	-
ENSMUSG00000047361	40.3588	17.3424	51.8707	8.49837	28.0151	706.346	98.1834	110.823	11.7963	25.3387	29.2171	190.497	-2.70506	0.00612433	0.145145	Gm973	1	59516264	59636417	+	5484	protein_coding	predicted gene 973 [Source:MGI Symbol;Acc:MGI:2685819]	-	-
ENSMUSG00000021176	29.6756	45.283	36.908	46.741	41.5397	65.5679	65.4556	73.5554	84.5401	48.93	40.0295	67.6098	-0.751441	0.00613048	0.145145	Efcab11	12	99693045	99884439	-	5309	protein_coding	EF-hand calcium binding domain 11 [Source:MGI Symbol;Acc:MGI:1926017]	-	-
ENSMUSG00000033629	5262.07	6818.46	6310.28	6874.12	3744.37	4514.25	3776.21	3998.47	4481.61	4051.58	5801.86	4164.42	0.47841	0.00617002	0.145931	Hacd3	9	64986983	65021693	-	2709	protein_coding	3-hydroxyacyl-CoA dehydratase 3 [Source:MGI Symbol;Acc:MGI:1889341]	-	-
ENSMUSG00000037826	986.415	827.619	912.726	868.958	682.99	761.979	628.566	525.676	679.27	584.538	855.742	636.006	0.427882	0.00621408	0.146823	Ppm1k	6	57506502	57535468	-	6022	protein_coding	protein phosphatase 1K (PP2C domain containing) [Source:MGI Symbol;Acc:MGI:2442111]	-	-
ENSMUSG00000021483	144.817	107.908	105.737	105.167	150.702	248.363	171.34	202.032	156.301	152.032	122.866	186.014	-0.59846	0.00623683	0.147147	Cdk20	13	64432314	64441773	+	6775	protein_coding	cyclin-dependent kinase 20 [Source:MGI Symbol;Acc:MGI:2145349]	-	-
ENSMUSG00000019178	0	6.74428	12.9677	7.43607	8.69435	90.4043	35.6155	9.80738	9.83025	11.3587	7.16848	31.4032	-2.12033	0.00624057	0.147147	Styxl1	5	135747220	135778385	-	1770	protein_coding	serine/threonine/tyrosine interacting-like 1 [Source:MGI Symbol;Acc:MGI:1923821]	-	-
ENSMUSG00000031022	0	7.70774	27.9304	11.6853	5.79623	253.331	51.0169	77.4783	6.88117	19.2225	10.6239	81.5859	-2.93771	0.00625215	0.14727	BC051019	7	109712181	109723850	-	2070	protein_coding	cDNA sequence BC051019 [Source:MGI Symbol;Acc:MGI:1928824]	-	-
ENSMUSG00000024253	254.023	270.735	335.165	387.738	444.378	438.113	418.723	551.175	496.427	517.26	338.408	484.34	-0.516547	0.00628779	0.147881	Dync2li1	17	84626496	84655558	+	1324	protein_coding	dynein cytoplasmic 2 light intermediate chain 1 [Source:MGI Symbol;Acc:MGI:1913996]	-	-
ENSMUSG00000057836	16.6183	16.379	18.9528	23.3705	19.3208	45.6989	58.7175	22.557	21.6265	56.7937	18.9283	41.0787	-1.11946	0.00629466	0.147881	Xlr3a	X	73086293	73097095	-	4045	protein_coding	X-linked lymphocyte-regulated 3A [Source:MGI Symbol;Acc:MGI:109506]	-	-
ENSMUSG00000030125	0	0	16.9577	10.623	3.86416	333.8	53.9046	79.4398	12.7793	1.7475	6.28897	96.3343	-3.93524	0.00629729	0.147881	Lrrc23	6	124769863	124779727	-	1734	protein_coding	leucine rich repeat containing 23 [Source:MGI Symbol;Acc:MGI:1315192]	-	-
ENSMUSG00000021879	0	0	37.9055	1.0623	11.5925	734.162	107.809	193.205	15.7284	6.11625	10.1121	211.404	-4.38382	0.00632305	0.148335	Dnah12	14	26693274	26891703	+	12009	protein_coding	dynein, axonemal, heavy chain 12 [Source:MGI Symbol;Acc:MGI:107720]	-	-
novel.557	0	0	0	0	0	24.8363	1.92516	9.80738	0	0	0	7.31378	-5.26614	0.0063458	0.148571	-	19	56703471	56713778	+	860	-	- && - && -	-	-
ENSMUSG00000026790	821.419	755.359	675.317	796.722	920.635	914.971	981.834	1023.89	1185.53	1019.67	793.891	1025.18	-0.368913	0.006346	0.148571	Odf2	2	29889221	29931746	+	9919	protein_coding	outer dense fiber of sperm tails 2 [Source:MGI Symbol;Acc:MGI:1098824]	-	-
ENSMUSG00000023150	4236.48	4494.58	5555.16	7203.43	9165.78	5894.16	13018.9	12890.8	7905.48	10270.9	6131.09	9996.06	-0.705192	0.00636753	0.148924	Ivns1abp	1	151344477	151364422	+	5435	protein_coding	influenza virus NS1A binding protein [Source:MGI Symbol;Acc:MGI:2152389]	-	-
ENSMUSG00000034245	116.328	108.872	234.416	125.351	214.461	686.477	256.047	419.756	135.657	178.245	159.886	335.236	-1.06719	0.00641881	0.149958	Hdac11	6	91156665	91174692	+	3849	protein_coding	histone deacetylase 11 [Source:MGI Symbol;Acc:MGI:2385252]	-	-
ENSMUSG00000035860	0	9.63468	52.8683	1.0623	0.966039	969.611	118.398	236.358	6.88117	3.495	12.9063	266.949	-4.36886	0.00642472	0.149958	Cdhr3	12	33033796	33092875	-	4569	protein_coding	cadherin-related family member 3 [Source:MGI Symbol;Acc:MGI:1916014]	-	-
ENSMUSG00000100158	4.74809	9.63468	5.98509	9.56067	1.93208	1.98691	0.962582	0	0	0	6.37212	0.589898	3.45739	0.00643807	0.149969	Gm28119	9	41581908	41582283	+	298	sense_intronic	predicted gene 28119 [Source:MGI Symbol;Acc:MGI:5578825]	-	-
ENSMUSG00000010021	73.5954	47.2099	73.8161	16.9967	4.83019	1192.14	103.959	198.109	34.4059	38.445	43.2897	313.413	-2.85646	0.00644141	0.149969	Kif19a	11	114765388	114790739	+	4068	protein_coding	kinesin family member 19A [Source:MGI Symbol;Acc:MGI:2447024]	-	-
ENSMUSG00000086332	8.30916	38.5387	37.9055	55.2394	9.66039	2.98036	5.77549	15.6918	14.7454	3.495	29.9306	8.53761	1.81482	0.00645272	0.149969	4930480G23Rik	4	19979445	19985388	-	1013	antisense	RIKEN cDNA 4930480G23 gene [Source:MGI Symbol;Acc:MGI:1922238]	-	-
ENSMUSG00000090124	39.1717	36.6118	79.8011	46.741	29.9472	233.462	89.5202	132.4	48.1682	42.8137	46.4546	109.273	-1.23288	0.00646102	0.149969	Ugt1a7c	1	88095062	88220002	+	4219	protein_coding	UDP glucuronosyltransferase 1 family, polypeptide A7C [Source:MGI Symbol;Acc:MGI:3032636]	-	-
ENSMUSG00000081664	0	0	0	1.0623	0	4.96727	9.62582	1.96148	0.983025	6.11625	0.212459	4.73077	-4.06396	0.00646213	0.149969	Gm15544	7	80429210	80430740	+	1531	processed_pseudogene	predicted gene 15544 [Source:MGI Symbol;Acc:MGI:3782993]	-	-
ENSMUSG00000011154	16.6183	26.0136	53.8658	27.6197	29.9472	214.586	69.3059	74.5361	34.4059	24.465	30.8129	83.4598	-1.43414	0.0064642	0.149969	Cfap161	7	83774101	83794880	-	3188	protein_coding	cilia and flagella associated protein 161 [Source:MGI Symbol;Acc:MGI:1922806]	-	-
ENSMUSG00000040111	17570.3	8765.63	8595.58	6351.47	10465.1	5300.08	7484.08	5850.1	6631.48	7651.42	10349.6	6583.43	0.652605	0.00647538	0.150078	Gramd1b	9	40293233	40531383	-	10075	protein_coding	GRAM domain containing 1B [Source:MGI Symbol;Acc:MGI:1925037]	-	-
ENSMUSG00000086863	51.042	62.6254	74.8136	111.541	67.6227	18.8756	41.391	43.1525	41.287	51.5512	73.529	39.2515	0.903859	0.0065057	0.150629	Gm15543	6	145182275	145187630	+	361	antisense	predicted gene 15543 [Source:MGI Symbol;Acc:MGI:3782992]	-	-
ENSMUSG00000029089	118.702	193.657	152.62	203.961	206.732	203.658	288.775	285.395	259.518	249.019	175.134	257.273	-0.552956	0.0065161	0.15067	5730480H06Rik	5	48327952	48414294	+	9317	protein_coding	RIKEN cDNA 5730480H06 gene [Source:MGI Symbol;Acc:MGI:1917842]	-	-
ENSMUSG00000106369	20.1794	4.81734	8.97763	2.12459	2.89812	2.98036	0	0	0	0	7.79941	0.596072	3.73188	0.00652052	0.15067	Gm43355	3	127479435	127481427	-	346	transcribed_unprocessed_pseudogene	predicted gene 43355 [Source:MGI Symbol;Acc:MGI:5663492]	-	-
ENSMUSG00000039208	269.454	392.131	318.207	410.046	467.563	355.656	550.597	639.441	526.901	762.783	371.48	567.076	-0.609906	0.00655824	0.15139	Metrnl	11	121701544	121716306	+	1586	protein_coding	meteorin, glial cell differentiation regulator-like [Source:MGI Symbol;Acc:MGI:2384806]	-	-
ENSMUSG00000027242	179.24	184.986	144.64	177.403	145.872	194.717	257.009	221.647	259.518	216.69	166.428	229.916	-0.467009	0.00656889	0.151485	Wdr76	2	121506723	121544860	+	6305	protein_coding	WD repeat domain 76 [Source:MGI Symbol;Acc:MGI:1926186]	-	-
ENSMUSG00000053175	337.114	426.816	418.956	407.922	320.725	155.972	234.87	362.873	267.383	245.524	382.307	253.324	0.593966	0.00658112	0.151615	Bcl3	7	19808462	19822770	-	2475	protein_coding	B cell leukemia/lymphoma 3 [Source:MGI Symbol;Acc:MGI:88140]	-	-
ENSMUSG00000085162	10.6832	12.5251	19.9503	18.059	13.5245	19.8691	34.653	46.0947	31.4568	27.96	14.9484	32.0067	-1.09532	0.00659087	0.15163	Gm12295	11	65277654	65365798	-	3585	lincRNA	predicted gene 12295 [Source:MGI Symbol;Acc:MGI:3650535]	-	-
ENSMUSG00000036867	277.763	250.502	242.396	236.892	265.661	193.723	209.843	176.533	173.995	207.079	254.643	192.235	0.404544	0.00659488	0.15163	Smad6	9	63953076	64022059	-	3205	protein_coding	SMAD family member 6 [Source:MGI Symbol;Acc:MGI:1336883]	-	-
ENSMUSG00000049577	961.488	492.332	658.359	446.164	584.454	402.349	392.734	499.196	398.125	414.157	628.56	421.312	0.576414	0.00661828	0.152016	Zfpm1	8	122282141	122337251	+	3503	protein_coding	zinc finger protein, multitype 1 [Source:MGI Symbol;Acc:MGI:1095400]	C2H2	C2H2
ENSMUSG00000026655	306.252	292.894	382.048	400.486	263.729	1035.18	441.825	562.944	378.464	366.101	329.082	556.903	-0.7588	0.00666396	0.152913	Fam107b	2	3570488	3782142	+	4329	protein_coding	family with sequence similarity 107, member B [Source:MGI Symbol;Acc:MGI:1913790]	-	-
ENSMUSG00000058454	2139.01	4508.07	2803.02	4157.83	1252.95	1499.12	1546.87	734.573	2695.45	1349.07	2972.18	1565.02	0.925379	0.00669977	0.153582	Dhcr7	7	143823145	143848410	+	5817	protein_coding	7-dehydrocholesterol reductase [Source:MGI Symbol;Acc:MGI:1298378]	-	-
ENSMUSG00000031595	37.9847	61.662	62.8434	60.5509	70.5208	119.214	89.5202	102.978	62.9136	111.84	58.7124	97.2931	-0.725228	0.0067294	0.154109	Pdgfrl	8	40926212	40990785	+	3126	protein_coding	platelet-derived growth factor receptor-like [Source:MGI Symbol;Acc:MGI:1916047]	-	-
ENSMUSG00000033287	1645.21	1271.78	1041.4	854.086	1075.2	1005.38	785.467	778.706	697.947	848.411	1177.54	823.181	0.516166	0.00673724	0.154126	Kctd17	15	78428564	78439303	+	2541	protein_coding	potassium channel tetramerisation domain containing 17 [Source:MGI Symbol;Acc:MGI:1920094]	-	-
ENSMUSG00000019312	22.5534	21.1963	24.9379	9.56067	8.69435	343.735	44.2788	77.4783	8.84722	13.1062	17.3885	97.4891	-2.48727	0.0067435	0.154126	Grb7	11	98446394	98455373	+	3365	protein_coding	growth factor receptor bound protein 7 [Source:MGI Symbol;Acc:MGI:102683]	-	-
ENSMUSG00000028640	7.12213	0	3.99006	4.24919	0	30.7971	7.70066	22.557	9.83025	6.99	3.07228	15.575	-2.37041	0.00677553	0.154705	Tfap2c	2	172549593	172558622	+	3679	protein_coding	transcription factor AP-2, gamma [Source:MGI Symbol;Acc:MGI:106032]	-	-
ENSMUSG00000095366	2.37404	8.67121	0.997514	29.7443	1.93208	1.98691	0	0.980738	0	0.87375	8.74383	0.768279	3.51049	0.00679907	0.155089	Gm21860	Y	90754513	90754821	-	309	protein_coding	predicted gene, 21860 [Source:MGI Symbol;Acc:MGI:5434024]	-	-
ENSMUSG00000018651	236.217	291.931	215.463	313.377	312.031	345.722	330.166	421.717	387.312	388.819	273.804	374.747	-0.452129	0.00681521	0.155303	Tada2a	11	84078920	84129600	-	2974	protein_coding	transcriptional adaptor 2A [Source:MGI Symbol;Acc:MGI:2144471]	-	-
ENSMUSG00000111444	0	0	0	2.12459	0	20.8625	4.81291	0	4.91512	6.99	0.424919	7.51611	-4.15231	0.00682565	0.155344	Gm47923	9	60919223	60949373	+	2201	lincRNA	predicted gene, 47923 [Source:MGI Symbol;Acc:MGI:6097180]	-	-
ENSMUSG00000029798	364.416	410.437	371.075	407.922	305.268	212.599	238.72	304.029	334.228	242.902	371.824	266.496	0.480676	0.00683154	0.155344	Herc6	6	57581000	57664632	+	9292	protein_coding	hect domain and RLD 6 [Source:MGI Symbol;Acc:MGI:1914388]	-	-
ENSMUSG00000027048	0	0	0	0	0	88.4174	0.962582	14.7111	0	0.87375	0	20.993	-6.78867	0.0068372	0.155344	Abcb11	2	69238282	69342616	-	5146	protein_coding	ATP-binding cassette, sub-family B (MDR/TAP), member 11 [Source:MGI Symbol;Acc:MGI:1351619]	-	-
ENSMUSG00000048636	521.103	606.021	207.483	212.459	151.668	67.5549	101.071	188.302	262.468	168.634	339.747	157.606	1.10779	0.00685732	0.1556	A730049H05Rik	6	92816478	92847174	+	3739	protein_coding	RIKEN cDNA A730049H05 gene [Source:MGI Symbol;Acc:MGI:1921766]	-	-
ENSMUSG00000041237	0	0.963468	1.99503	2.12459	3.86416	65.5679	25.9897	5.88443	0	0	1.78945	19.4884	-3.42989	0.00686191	0.1556	Pklr	3	89136142	89146784	+	3236	protein_coding	pyruvate kinase liver and red blood cell [Source:MGI Symbol;Acc:MGI:97604]	-	-
ENSMUSG00000031959	684.912	439.341	494.767	584.263	528.423	963.65	694.984	619.827	675.338	881.613	546.341	767.082	-0.490484	0.00687508	0.15569	Wdr59	8	111448797	111522092	-	8859	protein_coding	WD repeat domain 59 [Source:MGI Symbol;Acc:MGI:2442115]	-	-
ENSMUSG00000031165	33.2366	38.5387	26.9329	35.0558	47.3359	60.6007	80.8569	61.7865	39.321	78.6375	36.22	64.2405	-0.826029	0.00687937	0.15569	Was	X	8081453	8090498	-	2381	protein_coding	Wiskott-Aldrich syndrome [Source:MGI Symbol;Acc:MGI:105059]	-	-
ENSMUSG00000074896	297.943	172.461	571.576	212.459	256	203.658	109.734	225.57	144.505	150.285	302.088	166.75	0.857569	0.00689542	0.15581	Ifit3	19	34583531	34588731	+	1745	protein_coding	interferon-induced protein with tetratricopeptide repeats 3 [Source:MGI Symbol;Acc:MGI:1101055]	-	-
ENSMUSG00000061877	0	0	0	0	0	7.94763	2.88775	12.7496	1.96605	0	0	5.1102	-4.74813	0.00690795	0.15581	BC048679	7	81494275	81498281	-	640	protein_coding	cDNA sequence BC048679 [Source:MGI Symbol;Acc:MGI:3510776]	-	-
ENSMUSG00000021790	0	0	0	0	0.966039	14.9018	12.5136	2.94221	0	0.87375	0.193208	6.24627	-4.46136	0.00690919	0.15581	Dydc1	14	41072911	41092197	+	995	protein_coding	DPY30 domain containing 1 [Source:MGI Symbol;Acc:MGI:1916746]	-	-
ENSMUSG00000029364	1895.67	1791.09	1720.71	1743.23	1523.44	1592.51	1357.24	1358.32	1362.47	1298.39	1734.83	1393.79	0.315695	0.00691169	0.15581	Wsb2	5	117357304	117378601	+	5857	protein_coding	WD repeat and SOCS box-containing 2 [Source:MGI Symbol;Acc:MGI:2144041]	-	-
ENSMUSG00000021175	141.256	136.812	117.707	174.217	194.174	226.507	258.935	195.167	191.69	231.544	152.833	220.768	-0.53042	0.00693125	0.156032	Cdca7l	12	117804289	117878706	+	3258	protein_coding	cell division cycle associated 7 like [Source:MGI Symbol;Acc:MGI:2384982]	-	-
ENSMUSG00000070331	0	0.963468	0	0	1.93208	14.9018	8.66324	5.88443	4.91512	0.87375	0.579109	7.04767	-3.54537	0.00693506	0.156032	Qrich2	11	116441325	116466241	-	7513	protein_coding	glutamine rich 2 [Source:MGI Symbol;Acc:MGI:2684912]	-	-
novel.878	10.6832	10.5981	4.98757	3.18689	5.79623	0	0.962582	2.94221	0	0	7.05041	0.780959	3.1882	0.0069426	0.156047	-	6	31056506	31059819	-	308	-	- && - && -	-	-
ENSMUSG00000102420	0	1.92694	0.997514	0	0	31.7905	8.66324	15.6918	0	0	0.58489	11.2291	-4.22422	0.00696731	0.156047	Gm37464	3	75022396	75024615	-	2220	TEC	predicted gene, 37464 [Source:MGI Symbol;Acc:MGI:5610692]	-	-
ENSMUSG00000033053	14.2443	5.78081	7.98011	26.5574	0	118.221	36.5781	32.3644	24.5756	10.485	10.9125	44.4448	-2.03232	0.00697106	0.156047	1700028P14Rik	19	23558760	23652812	-	868	protein_coding	RIKEN cDNA 1700028P14 gene [Source:MGI Symbol;Acc:MGI:1914733]	-	-
novel.611	13.0572	31.7944	18.9528	43.5541	2.89812	0.993454	10.5884	0	6.88117	0	22.0513	3.69261	2.58256	0.00697464	0.156047	-	2	131807208	131809389	+	1056	-	- && - && -	-	-
ENSMUSG00000028024	390.53	585.789	502.747	446.164	608.605	534.478	994.348	745.361	626.187	787.248	506.767	737.524	-0.540777	0.00697511	0.156047	Enpep	3	129269175	129332720	-	4706	protein_coding	glutamyl aminopeptidase [Source:MGI Symbol;Acc:MGI:106645]	-	-
ENSMUSG00000095788	0	3.85387	0.997514	2.12459	6.76227	43.712	38.5033	2.94221	2.94907	3.495	2.74765	18.3203	-2.71651	0.00697669	0.156047	Sirpb1a	3	15371653	15426520	-	2291	protein_coding	signal-regulatory protein beta 1A [Source:MGI Symbol;Acc:MGI:2444824]	-	-
ENSMUSG00000041886	5.93511	4.81734	32.918	1.0623	4.83019	225.514	26.9523	69.6324	7.8642	18.3487	9.91258	69.6623	-2.81052	0.0069847	0.156047	Macc1	12	119314270	119469987	+	8406	protein_coding	metastasis associated in colon cancer 1 [Source:MGI Symbol;Acc:MGI:2685113]	-	-
ENSMUSG00000039552	22.5534	23.1232	29.9254	7.43607	10.6264	1031.21	138.612	131.419	3.9321	0	18.7329	261.034	-3.80055	0.0069898	0.156047	Rsph4a	10	33905111	33916021	+	3650	protein_coding	radial spoke head 4 homolog A (Chlamydomonas) [Source:MGI Symbol;Acc:MGI:3027894]	-	-
novel.779	2379.98	2825.85	3151.15	2919.19	1850.93	2602.85	1339.91	2043.86	1082.31	1065.97	2625.42	1626.98	0.690461	0.00700034	0.156131	-	4	149433557	149439471	-	5915	-	- && sp|P11227|POL_MLVRD Gag-Pol polyprotein OS=Radiation murine leukemia virus OX=11787 GN=pol PE=3 SV=2 && PF01140:Matrix protein (MA), p15	-	-
ENSMUSG00000056917	1198.89	902.77	793.024	839.214	1066.51	638.791	732.525	678.671	742.184	802.102	960.081	718.854	0.416868	0.00701278	0.156258	Sipa1	19	5651185	5663707	-	3868	protein_coding	signal-induced proliferation associated gene 1 [Source:MGI Symbol;Acc:MGI:107576]	-	-
novel.70	0	0	2.99254	0	0	29.8036	10.5884	24.5185	0	0	0.598509	12.9821	-4.41711	0.00702196	0.156311	-	10	43766394	43768752	+	907	-	- && - && -	-	-
ENSMUSG00000063529	0	2.8904	1.99503	0	0	194.717	54.8672	56.8828	0	0	0.977087	61.2934	-5.95787	0.00703748	0.156506	Stmnd1	13	46273721	46300115	+	1363	protein_coding	stathmin domain containing 1 [Source:MGI Symbol;Acc:MGI:2686420]	-	-
ENSMUSG00000041658	70.0343	95.3833	108.729	149.784	142.974	127.162	222.357	227.531	135.657	235.039	113.381	189.549	-0.740503	0.00705916	0.156837	Rragb	X	153139981	153171943	+	2258	protein_coding	Ras-related GTP binding B [Source:MGI Symbol;Acc:MGI:3038613]	-	-
ENSMUSG00000050966	7.12213	4.81734	0	12.7476	1.93208	7.94763	25.0271	19.6148	12.7793	41.0662	5.32382	21.287	-2.01491	0.00714336	0.15847	Lin28a	4	134003330	134018841	-	3996	protein_coding	lin-28 homolog A (C. elegans) [Source:MGI Symbol;Acc:MGI:1890546]	CSD	CSD
ENSMUSG00000108057	26.1145	0.963468	9.97514	8.49837	0	0	0	1.96148	0.983025	0	9.11029	0.5889	3.96168	0.0071464	0.15847	Gm44234	6	77323906	77324805	-	900	TEC	predicted gene, 44234 [Source:MGI Symbol;Acc:MGI:5690626]	-	-
ENSMUSG00000037738	71.2213	26.9771	15.9602	11.6853	14.4906	210.612	47.1665	81.4013	43.2531	30.5812	28.0669	82.6029	-1.56309	0.0072107	0.159716	Nek5	8	22073616	22125053	-	2897	protein_coding	NIMA (never in mitosis gene a)-related expressed kinase 5 [Source:MGI Symbol;Acc:MGI:2142824]	-	-
ENSMUSG00000053046	3.56107	2.8904	15.9602	3.18689	3.86416	9.93454	21.1768	19.6148	28.5077	17.475	5.89255	19.3418	-1.70814	0.00722792	0.159716	Brsk2	7	141949751	142004247	+	6178	protein_coding	BR serine/threonine kinase 2 [Source:MGI Symbol;Acc:MGI:1923020]	-	-
ENSMUSG00000045467	13.0572	13.4886	9.97514	4.24919	9.66039	99.3454	25.9897	15.6918	11.7963	14.8537	10.0861	33.5354	-1.73205	0.00722921	0.159716	Ttll13	7	80246376	80260821	+	4321	protein_coding	tubulin tyrosine ligase-like family, member 13 [Source:MGI Symbol;Acc:MGI:1920845]	-	-
ENSMUSG00000057176	40.3588	67.4428	68.8285	60.5509	85.0114	151.005	74.1188	119.65	106.167	91.7437	64.4385	108.537	-0.747442	0.00723025	0.159716	Ccdc189	7	127582383	127588595	-	3426	protein_coding	coiled-coil domain containing 189 [Source:MGI Symbol;Acc:MGI:2685012]	-	-
ENSMUSG00000026638	102.084	67.4428	193.518	67.987	79.2152	768.933	136.687	468.793	120.912	124.946	102.049	324.054	-1.66677	0.00724058	0.159791	Irf6	1	193153111	193172023	+	7069	protein_coding	interferon regulatory factor 6 [Source:MGI Symbol;Acc:MGI:1859211]	-	-
ENSMUSG00000041930	985.228	1157.13	1253.88	1302.38	2114.66	597.066	583.325	661.998	1046.92	1273.93	1362.65	832.647	0.710587	0.00727792	0.160462	Fam222a	5	114568016	114613220	+	3141	protein_coding	family with sequence similarity 222, member A [Source:MGI Symbol;Acc:MGI:3605543]	-	-
ENSMUSG00000107582	3.56107	3.85387	6.9826	3.18689	5.79623	2.98036	23.102	21.5762	21.6265	12.2325	4.67613	16.3035	-1.79491	0.00734516	0.16179	Gm44133	6	130987148	131003919	-	2783	transcribed_unprocessed_pseudogene	predicted gene, 44133 [Source:MGI Symbol;Acc:MGI:5690525]	C2H2	C2H2
novel.150	14.2443	0.963468	4.98757	1.0623	0.966039	0	0	0	0	0	4.44473	0	4.64717	0.00737115	0.162207	-	11	101696463	101697555	+	549	-	- && - && -	-	-
ENSMUSG00000002981	4083.36	3638.06	3621.97	3281.43	3367.61	3007.18	2721.22	2737.24	2996.26	3159.48	3598.49	2924.28	0.29915	0.0073804	0.162256	Clptm1	7	19631571	19665033	-	6210	protein_coding	cleft lip and palate associated transmembrane protein 1 [Source:MGI Symbol;Acc:MGI:1927155]	-	-
ENSMUSG00000039110	28.4885	71.2966	27.9304	41.4296	65.6906	368.571	51.9794	102.978	52.1003	55.0462	46.9672	126.135	-1.42261	0.00739814	0.162492	Mycbpap	11	94501347	94521742	-	3871	protein_coding	MYCBP associated protein [Source:MGI Symbol;Acc:MGI:2388726]	-	-
ENSMUSG00000031204	0	0	0	0	0	6.95418	0	14.7111	0.983025	3.495	0	5.22865	-4.78257	0.00741783	0.162769	Asb12	X	95470201	95557987	-	1594	protein_coding	ankyrin repeat and SOCS box-containing 12 [Source:MGI Symbol;Acc:MGI:1917642]	-	-
ENSMUSG00000022155	0	0.963468	0	2.12459	0.966039	4.96727	17.3265	2.94221	3.9321	6.11625	0.81082	7.05686	-3.10844	0.0074395	0.163023	Mroh2b	15	4898737	4962205	+	5915	protein_coding	maestro heat-like repeat family member 2B [Source:MGI Symbol;Acc:MGI:1921905]	-	-
ENSMUSG00000115856	0	1.92694	5.98509	2.12459	1.93208	27.8167	6.73808	9.80738	3.9321	12.2325	2.39374	12.1054	-2.3183	0.00744354	0.163023	Gm18095	15	99880199	99881216	+	746	processed_pseudogene	predicted gene, 18095 [Source:MGI Symbol;Acc:MGI:5010280]	-	-
ENSMUSG00000001249	7.12213	3.85387	23.9403	5.31148	19.3208	104.313	11.551	73.5554	13.7623	16.6012	11.9097	43.9565	-1.87866	0.00746783	0.163071	Hpn	7	31098725	31115290	-	4101	protein_coding	hepsin [Source:MGI Symbol;Acc:MGI:1196620]	-	-
ENSMUSG00000031367	413.084	644.56	1090.28	551.332	448.242	2409.13	661.294	1866.34	780.521	607.256	629.5	1264.91	-1.00648	0.0074724	0.163071	Ap1s2	X	163909017	163933666	+	4965	protein_coding	adaptor-related protein complex 1, sigma 2 subunit [Source:MGI Symbol;Acc:MGI:1889383]	-	-
ENSMUSG00000029674	530.599	397.912	370.078	377.115	390.28	355.656	299.363	308.933	290.975	283.969	413.197	307.779	0.424075	0.00747341	0.163071	Limk1	5	134656039	134688598	-	7162	protein_coding	LIM-domain containing, protein kinase [Source:MGI Symbol;Acc:MGI:104572]	LIM	LIM
ENSMUSG00000029330	188.737	133.922	230.426	178.466	267.593	853.377	251.234	330.509	188.741	304.065	199.829	385.585	-0.94791	0.00747395	0.163071	Cds1	5	101765130	101823858	+	3939	protein_coding	CDP-diacylglycerol synthase 1 [Source:MGI Symbol;Acc:MGI:1921846]	-	-
novel.791	0	0	0	0	0	3.97382	5.77549	0	6.88117	6.11625	0	4.54935	-4.58387	0.00752188	0.163961	-	5	65911271	65911579	+	309	-	- && - && -	-	-
ENSMUSG00000047678	2.37404	7.70774	9.97514	14.8721	7.72831	18.8756	34.653	2.94221	59.9645	31.455	8.53148	29.5781	-1.78933	0.00754548	0.164189	Gpr82	X	13661363	13667433	+	2497	protein_coding	G protein-coupled receptor 82 [Source:MGI Symbol;Acc:MGI:2441734]	-	-
novel.812	0	0	0.997514	0	0	112.26	14.4387	14.7111	0	0	0.199503	28.282	-6.64166	0.00754655	0.164189	-	5	137176952	137178375	+	745	-	- && - && -	-	-
ENSMUSG00000027676	83.0916	121.397	131.672	166.781	133.313	345.722	231.982	175.552	193.656	126.694	127.251	214.721	-0.753026	0.00758941	0.164966	Ccdc39	3	33812362	33844310	-	7443	protein_coding	coiled-coil domain containing 39 [Source:MGI Symbol;Acc:MGI:1289263]	-	-
ENSMUSG00000027331	283.698	277.479	221.448	353.745	370.959	282.141	492.842	463.889	439.412	584.538	301.466	452.565	-0.586477	0.00761048	0.165268	Knstrn	2	118814003	118853957	+	5158	protein_coding	kinetochore-localized astrin/SPAG5 binding [Source:MGI Symbol;Acc:MGI:1289298]	-	-
ENSMUSG00000112698	0	0	0	3.18689	0	3.97382	13.4762	6.86517	1.96605	10.485	0.637378	7.35324	-3.55439	0.00762275	0.165379	Gm7525	10	12846088	12846541	+	454	processed_pseudogene	predicted gene 7525 [Source:MGI Symbol;Acc:MGI:3645975]	-	-
ENSMUSG00000008193	4.74809	7.70774	113.717	171.03	22.2189	17.8822	21.1768	20.5955	0.983025	9.61124	63.8842	14.0498	2.18565	0.00765098	0.165734	Spib	7	44525993	44532071	-	2868	protein_coding	Spi-B transcription factor (Spi-1/PU.1 related) [Source:MGI Symbol;Acc:MGI:892986]	-	-
ENSMUSG00000049350	24.9275	26.9771	34.913	23.3705	36.7095	42.7185	48.1291	62.7672	41.287	65.5312	29.3795	52.0866	-0.823943	0.00765347	0.165734	Zg16	7	127050156	127087328	-	1257	protein_coding	zymogen granule protein 16 [Source:MGI Symbol;Acc:MGI:1916286]	-	-
ENSMUSG00000028139	5.93511	1.92694	10.9727	0	5.79623	49.6727	19.2516	46.0947	1.96605	6.99	4.92619	24.795	-2.32955	0.00771021	0.166663	Riiad1	3	94464983	94480341	-	813	protein_coding	regulatory subunit of type II PKA R-subunit (RIIa) domain containing 1 [Source:MGI Symbol;Acc:MGI:1913603]	-	-
ENSMUSG00000011752	5322.61	6249.05	5288.82	5474.01	4841.79	3959.91	4127.55	3107.96	5004.58	4443.02	5435.26	4128.6	0.396683	0.0077167	0.166663	Pgam1	19	41911871	41918664	+	1831	protein_coding	phosphoglycerate mutase 1 [Source:MGI Symbol;Acc:MGI:97552]	-	-
ENSMUSG00000032267	749.011	527.98	544.643	595.948	657.873	595.079	897.127	916.009	889.637	914.816	615.091	842.534	-0.454627	0.00772268	0.166663	Usp28	9	48985375	49042517	+	5832	protein_coding	ubiquitin specific peptidase 28 [Source:MGI Symbol;Acc:MGI:2442293]	-	-
ENSMUSG00000107728	49.8549	42.3926	46.8832	41.4296	56.0303	99.3454	73.1563	49.0369	85.5231	82.1325	47.3181	77.8388	-0.718118	0.00772522	0.166663	Gm38910	6	134605234	134607681	-	2448	lincRNA	predicted gene, 38910 [Source:MGI Symbol;Acc:MGI:5621795]	-	-
ENSMUSG00000048281	0	7.70774	2.99254	10.623	10.6264	9.93454	29.8401	43.1525	12.7793	19.2225	6.38994	22.9858	-1.83474	0.00775792	0.167158	Dleu7	14	62276231	62293047	-	1536	protein_coding	deleted in lymphocytic leukemia, 7 [Source:MGI Symbol;Acc:MGI:2447771]	-	-
ENSMUSG00000034607	1.18702	5.78081	16.9577	19.1213	19.3208	87.4239	22.1394	68.6517	20.6435	13.1062	12.4735	42.393	-1.75812	0.0077671	0.167158	Pof1b	X	112638431	112698651	-	3886	protein_coding	premature ovarian failure 1B [Source:MGI Symbol;Acc:MGI:1916943]	-	-
ENSMUSG00000029247	2838.17	2869.21	2560.62	2887.32	2622.8	3040.96	3333.42	3343.34	3292.15	3746.64	2755.62	3351.3	-0.282499	0.00776993	0.167158	Paics	5	76951307	76967509	+	3139	protein_coding	phosphoribosylaminoimidazole carboxylase, phosphoribosylaminoribosylaminoimidazole, succinocarboxamide synthetase [Source:MGI Symbol;Acc:MGI:1914304]	-	-
ENSMUSG00000004864	49.8549	113.689	89.7763	117.915	61.8265	292.075	96.2582	130.438	139.589	148.537	86.6124	161.38	-0.896084	0.0077792	0.167202	Mapk13	17	28769297	28780233	+	3150	protein_coding	mitogen-activated protein kinase 13 [Source:MGI Symbol;Acc:MGI:1346864]	-	-
ENSMUSG00000025235	254.023	255.319	290.277	321.876	353.57	377.512	353.268	459.966	385.346	401.051	295.013	395.429	-0.421953	0.00782057	0.167879	Bbs4	9	59321990	59353508	-	6039	protein_coding	Bardet-Biedl syndrome 4 (human) [Source:MGI Symbol;Acc:MGI:2143311]	-	-
novel.1000	4.74809	0.963468	0	1.0623	4.83019	11.9214	8.66324	10.7881	6.88117	14.8537	2.32081	10.6215	-2.21326	0.00782524	0.167879	-	8	56611584	56623150	-	619	-	- && - && -	-	-
ENSMUSG00000092526	62.9122	11.5616	22.9428	5.31148	16.4227	3.97382	8.66324	7.84591	6.88117	7.86375	23.8302	7.04558	1.74905	0.00785585	0.168379	Gm17907	7	55902602	55903311	-	710	processed_pseudogene	predicted gene, 17907 [Source:MGI Symbol;Acc:MGI:5010092]	-	-
ENSMUSG00000027199	407.149	899.879	745.143	816.906	718.733	1153.4	864.399	1414.22	941.738	993.453	717.562	1073.44	-0.580444	0.00787731	0.168552	Gatm	2	122594467	122611303	-	3001	protein_coding	glycine amidinotransferase (L-arginine:glycine amidinotransferase) [Source:MGI Symbol;Acc:MGI:1914342]	-	-
ENSMUSG00000025491	214.851	188.84	322.197	164.656	339.08	549.38	327.278	831.666	236.909	312.802	245.925	451.607	-0.876217	0.00787852	0.168552	Ifitm1	7	140967221	140969825	+	1094	protein_coding	interferon induced transmembrane protein 1 [Source:MGI Symbol;Acc:MGI:1915963]	-	-
ENSMUSG00000024033	36.7977	61.662	103.741	65.8624	49.268	417.251	152.088	133.38	54.0663	44.5612	63.4663	160.269	-1.33484	0.0078987	0.168827	Rsph1	17	31255019	31277356	-	1164	protein_coding	radial spoke head 1 homolog (Chlamydomonas) [Source:MGI Symbol;Acc:MGI:1194909]	-	-
ENSMUSG00000058207	0	0	0	0	0	0	0	4.90369	2.94907	26.2125	0	6.81305	-5.169	0.00793194	0.169381	Serpina3k	12	104338486	104346144	+	2057	protein_coding	serine (or cysteine) peptidase inhibitor, clade A, member 3K [Source:MGI Symbol;Acc:MGI:98377]	-	-
ENSMUSG00000030474	21.3664	28.904	34.913	48.8656	28.0151	62.5876	124.173	44.1332	32.4398	74.2687	32.4128	67.5205	-1.05842	0.00794609	0.169526	Siglece	7	43651070	43660161	-	1849	protein_coding	sialic acid binding Ig-like lectin E [Source:MGI Symbol;Acc:MGI:1932475]	-	-
ENSMUSG00000018623	0	0	5.98509	0	0	43.712	8.66324	13.7303	0.983025	2.62125	1.19702	13.942	-3.52354	0.00797065	0.169829	Mmp7	9	7692090	7699585	+	1068	protein_coding	matrix metallopeptidase 7 [Source:MGI Symbol;Acc:MGI:103189]	-	-
ENSMUSG00000038020	56.9771	49.1369	49.8757	69.0493	77.2831	114.247	81.8195	123.573	77.6589	86.5012	60.4644	96.76	-0.677456	0.00797497	0.169829	Rapgefl1	11	98836785	98853697	+	5677	protein_coding	Rap guanine nucleotide exchange factor (GEF)-like 1 [Source:MGI Symbol;Acc:MGI:3611446]	-	-
ENSMUSG00000081523	0	1.92694	0	1.0623	0.966039	0.993454	7.70066	8.82664	8.84722	7.86375	0.791054	6.84634	-3.08008	0.00799032	0.169999	Gm13058	4	143595062	143597611	-	1435	unprocessed_pseudogene	predicted gene 13058 [Source:MGI Symbol;Acc:MGI:3650002]	-	-
ENSMUSG00000022580	4.74809	17.3424	15.9602	14.8721	27.0491	59.6072	30.8026	33.3451	39.321	23.5912	15.9944	37.3334	-1.21065	0.00801627	0.170394	Rhpn1	15	75704280	75715485	+	4302	protein_coding	rhophilin, Rho GTPase binding protein 1 [Source:MGI Symbol;Acc:MGI:1098783]	-	-
ENSMUSG00000021974	4.74809	15.4155	5.98509	11.6853	26.0831	64.5745	22.1394	32.3644	14.7454	44.5612	12.7834	35.677	-1.47183	0.00806044	0.171175	Fgf9	14	58070547	58112720	+	4649	protein_coding	fibroblast growth factor 9 [Source:MGI Symbol;Acc:MGI:104723]	-	-
ENSMUSG00000098065	10.6832	3.85387	1.99503	2.12459	0	7.94763	8.66324	20.5955	29.4907	12.2325	3.73134	15.7859	-2.11145	0.00816881	0.173317	Gm5177	10	10605945	10616313	+	3785	transcribed_processed_pseudogene	predicted pseudogene 5177 [Source:MGI Symbol;Acc:MGI:3646657]	-	-
novel.1071	0	0	0	0	0	13.9084	0	15.6918	2.94907	0	0	6.50985	-5.09807	0.00818308	0.17346	-	GL456216.1	61418	65880	+	483	-	- && - && -	-	-
ENSMUSG00000091415	0	2.8904	1.99503	9.56067	0	231.475	49.0917	45.114	0	1.7475	2.88922	65.4856	-4.50207	0.00823616	0.174345	Ak9	10	41303980	41434534	+	6968	protein_coding	adenylate kinase 9 [Source:MGI Symbol;Acc:MGI:2685080]	-	-
ENSMUSG00000026401	0	0	0	0	0	4.96727	4.81291	4.90369	7.8642	0	0	4.50961	-4.5676	0.00823991	0.174345	Cd55b	1	130388537	130423009	-	1675	protein_coding	CD55 molecule, decay accelerating factor for complement B [Source:MGI Symbol;Acc:MGI:104849]	-	-
ENSMUSG00000031349	852.282	970.212	825.942	1129.22	690.718	445.067	674.77	496.254	895.535	463.961	893.675	595.117	0.586663	0.00826876	0.174795	Nsdhl	X	72918557	72958514	+	2853	protein_coding	NAD(P) dependent steroid dehydrogenase-like [Source:MGI Symbol;Acc:MGI:1099438]	-	-
ENSMUSG00000020491	207.729	206.182	193.518	171.03	184.513	232.468	265.673	238.319	246.739	288.337	192.594	254.307	-0.402021	0.00827876	0.174846	2810021J22Rik	11	58867216	58883288	+	3928	protein_coding	RIKEN cDNA 2810021J22 gene [Source:MGI Symbol;Acc:MGI:1917194]	C2H2	C2H2
ENSMUSG00000111950	0	0	0	0	1.93208	6.95418	1.92516	1.96148	5.89815	12.2325	0.386416	5.79429	-3.78105	0.00829496	0.175028	Gm48893	10	26695574	26742860	+	741	lincRNA	predicted gene, 48893 [Source:MGI Symbol;Acc:MGI:6098656]	-	-
ENSMUSG00000025480	0	0	0	0	2.89812	1.98691	14.4387	9.80738	1.96605	8.7375	0.579623	7.38731	-3.62067	0.008324	0.175481	Syce1	7	140777229	140787852	-	1460	protein_coding	synaptonemal complex central element protein 1 [Source:MGI Symbol;Acc:MGI:1921325]	-	-
ENSMUSG00000032349	11878.5	11429.6	12701.3	14616.1	8292.48	9132.82	10578.8	6950.49	8759.73	6608.17	11783.6	8406	0.487292	0.00834432	0.175748	Elovl5	9	77917364	77984519	+	3522	protein_coding	ELOVL family member 5, elongation of long chain fatty acids (yeast) [Source:MGI Symbol;Acc:MGI:1916051]	-	-
ENSMUSG00000043727	0	0	0	0	0	10.928	0	12.7496	0	6.99	0	6.13352	-5.01376	0.00835869	0.175891	F830045P16Rik	2	129458359	129536602	-	1925	protein_coding	RIKEN cDNA F830045P16 gene [Source:MGI Symbol;Acc:MGI:3045317]	-	-
ENSMUSG00000008999	77.1564	76.114	102.744	82.8591	149.736	264.259	162.676	151.034	137.623	112.714	97.7219	165.661	-0.759039	0.00839703	0.176536	Bmp7	2	172868012	172940321	-	4019	protein_coding	bone morphogenetic protein 7 [Source:MGI Symbol;Acc:MGI:103302]	-	-
ENSMUSG00000029130	11.8702	59.735	14.9627	43.5541	36.7095	91.3977	72.1937	75.5168	57.0154	58.5412	33.3663	70.933	-1.08229	0.00844443	0.177372	Rnf32	5	29195992	29228457	+	6761	protein_coding	ring finger protein 32 [Source:MGI Symbol;Acc:MGI:1861747]	-	-
ENSMUSG00000024376	52.229	56.8446	103.741	62.6755	60.8605	433.146	82.7821	203.013	41.287	75.1425	67.2702	167.074	-1.3114	0.00845732	0.177481	Epb41l4a	18	33796327	34007206	-	3853	protein_coding	erythrocyte membrane protein band 4.1 like 4a [Source:MGI Symbol;Acc:MGI:103007]	-	-
ENSMUSG00000070327	6690.06	3774.87	5272.86	5435.77	4427.36	4164.56	4079.42	2981.44	3797.42	3650.53	5120.18	3734.68	0.455099	0.00847122	0.177611	Rnf213	11	119393100	119487418	+	16888	protein_coding	ring finger protein 213 [Source:MGI Symbol;Acc:MGI:1289196]	-	-
ENSMUSG00000028182	23.7404	29.8675	16.9577	19.1213	27.0491	56.6269	29.8401	42.1717	63.8966	33.2025	23.3472	45.1475	-0.947936	0.00848718	0.177739	Lrriq3	3	155093434	155194280	+	4961	protein_coding	leucine-rich repeats and IQ motif containing 3 [Source:MGI Symbol;Acc:MGI:1921685]	-	-
ENSMUSG00000035673	1119.36	943.235	1061.36	1089.92	1109.01	769.927	784.505	935.624	950.585	799.481	1064.58	848.024	0.32802	0.00849274	0.177739	Sbno2	10	80056992	80105571	-	10715	protein_coding	strawberry notch 2 [Source:MGI Symbol;Acc:MGI:2448490]	-	-
ENSMUSG00000037820	2940.25	2328.7	3564.12	2854.39	2470.16	2727.03	1700.88	2212.55	1260.24	1799.05	2831.53	1939.95	0.545566	0.00851883	0.178108	Tgm2	2	158116402	158146436	-	4608	protein_coding	transglutaminase 2, C polypeptide [Source:MGI Symbol;Acc:MGI:98731]	-	-
ENSMUSG00000036743	37.9847	26.9771	37.9055	64.8001	62.7925	9.93454	35.6155	22.557	19.6605	20.97	46.092	21.7475	1.08288	0.0085258	0.178108	Psma8	18	14706151	14762299	+	1693	protein_coding	proteasome (prosome, macropain) subunit, alpha type, 8 [Source:MGI Symbol;Acc:MGI:1920927]	-	-
novel.234	2.37404	0	1.99503	3.18689	15.4566	17.8822	22.1394	20.5955	15.7284	15.7275	4.60252	18.4146	-1.98802	0.00856603	0.178749	-	12	75745876	75754091	-	655	-	- && - && -	-	-
ENSMUSG00000041837	244.527	312.164	295.264	300.63	358.4	522.557	402.359	370.719	334.228	454.35	302.197	416.843	-0.463044	0.00857196	0.178749	Pdcd7	9	65346104	65359643	+	2498	protein_coding	programmed cell death 7 [Source:MGI Symbol;Acc:MGI:1859170]	-	-
ENSMUSG00000028211	8658.14	4130.39	4244.42	3335.61	3669.02	3701.61	3297.81	2646.03	2903.85	2891.24	4807.52	3088.11	0.638456	0.00858729	0.178891	Trp53inp1	4	11156431	11174379	+	6475	protein_coding	transformation related protein 53 inducible nuclear protein 1 [Source:MGI Symbol;Acc:MGI:1926609]	-	-
ENSMUSG00000028639	46648.8	23161.8	17304.9	9364.14	18093.9	13229.8	8059.7	12812.4	15523.9	13952.9	22914.7	12715.7	0.84964	0.00859906	0.178891	Ybx1	4	119277981	119294604	-	2531	protein_coding	Y box protein 1 [Source:MGI Symbol;Acc:MGI:99146]	CSD	CSD
ENSMUSG00000048108	164.996	115.616	79.8011	73.2984	85.9775	127.162	133.799	114.746	295.89	295.327	103.938	193.385	-0.898151	0.00860204	0.178891	Tmem72	6	116679063	116716913	-	17177	protein_coding	transmembrane protein 72 [Source:MGI Symbol;Acc:MGI:2442707]	-	-
ENSMUSG00000007279	363.229	204.255	181.548	199.712	103.366	160.94	124.173	112.785	92.4043	119.704	210.422	122.001	0.784544	0.00862975	0.179306	Scube2	7	109798676	109865679	-	4153	protein_coding	signal peptide, CUB domain, EGF-like 2 [Source:MGI Symbol;Acc:MGI:1928765]	-	-
ENSMUSG00000000544	0	2.8904	4.98757	0	1.93208	42.7185	4.81291	8.82664	0.983025	12.2325	1.96201	13.9147	-2.80155	0.00866817	0.179942	Gpa33	1	166130238	166166510	+	2742	protein_coding	glycoprotein A33 (transmembrane) [Source:MGI Symbol;Acc:MGI:1891703]	-	-
novel.458	5.93511	8.67121	3.99006	3.18689	9.66039	11.9214	25.0271	19.6148	21.6265	10.485	6.28873	17.735	-1.48656	0.00868501	0.18013	-	17	74519734	74528080	-	811	-	- && - && -	-	-
ENSMUSG00000117221	16.6183	0	2.99254	4.24919	0	8.94108	11.551	30.4029	26.5417	36.6975	4.77201	22.8268	-2.2913	0.00869933	0.180187	AC104866.2	17	49304479	49312960	-	3128	lincRNA	novel transcript	-	-
ENSMUSG00000058897	15.4313	26.9771	41.8956	37.1804	37.6755	101.332	62.5679	67.6709	33.4228	51.5512	31.832	63.309	-0.986864	0.00870337	0.180187	Col25a1	3	130131501	130599877	+	12947	protein_coding	collagen, type XXV, alpha 1 [Source:MGI Symbol;Acc:MGI:1924268]	-	-
ENSMUSG00000020332	0	0	0.997514	2.12459	0.966039	3.97382	6.73808	6.86517	12.7793	2.62125	0.817629	6.59553	-3.00213	0.00872455	0.180464	Meikin	11	54370652	54426790	+	1524	protein_coding	meiotic kinetochore factor [Source:MGI Symbol;Acc:MGI:1922097]	-	-
ENSMUSG00000073139	834.477	892.171	826.939	824.342	829.827	658.66	709.423	610.019	696.964	749.677	841.551	684.949	0.29685	0.00876315	0.1811	Tmem185a	X	70459753	70477180	-	2513	protein_coding	transmembrane protein 185A [Source:MGI Symbol;Acc:MGI:2448555]	-	-
ENSMUSG00000027442	668.293	1077.16	1030.43	1896.2	376.755	527.524	711.348	385.43	721.54	355.616	1009.77	540.292	0.902308	0.00881444	0.181972	Cst8	2	148798785	148805595	+	853	protein_coding	cystatin 8 (cystatin-related epididymal spermatogenic) [Source:MGI Symbol;Acc:MGI:107161]	-	-
ENSMUSG00000016283	54.603	5.78081	93.7663	117.915	19.3208	8.94108	35.6155	25.4992	8.84722	6.99	58.2772	17.1786	1.76243	0.00882311	0.181972	H2-M2	17	37480851	37483552	-	1551	protein_coding	histocompatibility 2, M region locus 2 [Source:MGI Symbol;Acc:MGI:95914]	-	-
ENSMUSG00000027195	2276.71	2221.76	1886.3	2019.43	1404.62	1407.72	1460.24	1333.8	1656.4	1537.8	1961.76	1479.19	0.407125	0.00882899	0.181972	Hsd17b12	2	94032689	94157964	-	2407	protein_coding	hydroxysteroid (17-beta) dehydrogenase 12 [Source:MGI Symbol;Acc:MGI:1926967]	-	-
ENSMUSG00000052305	649.301	1354.64	602.499	303.817	468.529	673.562	338.829	155.937	188.741	274.357	675.756	326.285	1.05065	0.00885019	0.182246	Hbb-bs	7	103826534	103828096	-	768	protein_coding	hemoglobin, beta adult s chain [Source:MGI Symbol;Acc:MGI:5474852]	-	-
ENSMUSG00000025333	0	0	1.99503	0	0	1.98691	6.73808	6.86517	1.96605	10.485	0.399006	5.60824	-3.73417	0.00890744	0.183262	Gpr143	X	152781921	152808646	+	1995	protein_coding	G protein-coupled receptor 143 [Source:MGI Symbol;Acc:MGI:107193]	-	-
ENSMUSG00000070690	0	4.81734	0	5.31148	4.83019	14.9018	10.5884	10.7881	26.5417	6.11625	2.9918	13.7872	-2.18537	0.00892197	0.183397	5830473C10Rik	5	90561107	90597871	+	2919	protein_coding	RIKEN cDNA 5830473C10 gene [Source:MGI Symbol;Acc:MGI:1923342]	-	-
ENSMUSG00000018845	410.71	355.52	409.978	453.601	320.725	336.781	316.69	157.899	226.096	277.852	390.107	263.063	0.567949	0.00897011	0.184222	Unc45b	11	82910550	82943403	+	4493	protein_coding	unc-45 myosin chaperone B [Source:MGI Symbol;Acc:MGI:2443377]	-	-
ENSMUSG00000031843	236.217	328.543	304.242	394.112	410.567	315.918	481.291	532.541	580.968	551.336	334.736	492.411	-0.556228	0.00898361	0.184336	Mphosph6	8	117791645	117801943	-	2476	protein_coding	M phase phosphoprotein 6 [Source:MGI Symbol;Acc:MGI:1915783]	-	-
ENSMUSG00000001604	157.874	111.762	113.717	108.354	77.2831	265.252	141.5	181.437	139.589	173.002	113.798	180.156	-0.665042	0.00899365	0.184378	Tcea3	4	136247729	136274898	+	1400	protein_coding	transcription elongation factor A (SII), 3 [Source:MGI Symbol;Acc:MGI:1196908]	IWS1	IWS1
ENSMUSG00000046607	0	0	0	2.12459	0	35.7643	4.81291	8.82664	0	0	0.424919	9.88078	-4.54606	0.00900313	0.184408	Hrk	5	118164648	118189478	+	5677	protein_coding	harakiri, BCL2 interacting protein (contains only BH3 domain) [Source:MGI Symbol;Acc:MGI:1201608]	-	-
ENSMUSG00000086109	2.37404	4.81734	0	5.31148	8.69435	7.94763	16.3639	26.4799	9.83025	18.3487	4.23944	15.7941	-1.88866	0.00905357	0.185218	Gm13391	2	6472000	6478619	+	1143	lincRNA	predicted gene 13391 [Source:MGI Symbol;Acc:MGI:3651526]	-	-
ENSMUSG00000097587	4.74809	6.74428	3.99006	1.0623	8.69435	41.7251	12.5136	16.6725	14.7454	5.2425	5.04781	18.1798	-1.83737	0.00905869	0.185218	4930578M01Rik	15	98983348	98996446	+	6788	processed_transcript	RIKEN cDNA 4930578M01 gene [Source:MGI Symbol;Acc:MGI:1923201]	-	-
ENSMUSG00000000296	364.416	316.018	244.391	236.892	306.234	498.714	334.016	491.35	371.583	373.965	293.59	413.926	-0.495947	0.00908283	0.185547	Tpd52l1	10	31332376	31445958	-	1323	protein_coding	tumor protein D52-like 1 [Source:MGI Symbol;Acc:MGI:1298386]	-	-
ENSMUSG00000022512	225.534	262.063	362.098	206.085	186.446	826.554	276.261	484.485	308.67	286.59	248.445	436.512	-0.812562	0.00910748	0.185744	Cldn1	16	26356642	26371841	-	4841	protein_coding	claudin 1 [Source:MGI Symbol;Acc:MGI:1276109]	-	-
ENSMUSG00000022322	124.637	147.411	152.62	140.223	170.989	174.848	247.384	166.725	233.96	214.069	147.176	207.397	-0.493512	0.00910856	0.185744	Shcbp1	8	4735976	4779567	-	6295	protein_coding	Shc SH2-domain binding protein 1 [Source:MGI Symbol;Acc:MGI:1338802]	-	-
ENSMUSG00000036687	435.637	217.744	308.232	527.961	109.162	698.398	569.849	437.409	603.577	559.2	319.747	573.687	-0.844322	0.0091511	0.186441	Tmem184a	5	139802485	139819917	-	5277	protein_coding	transmembrane protein 184a [Source:MGI Symbol;Acc:MGI:2385897]	-	-
ENSMUSG00000066129	0	8.67121	29.9254	0	6.76227	678.529	72.1937	66.6902	2.94907	6.11625	9.07178	165.296	-4.18497	0.00915892	0.186441	Kndc1	7	139894696	139941537	+	10709	protein_coding	kinase non-catalytic C-lobe domain (KIND) containing 1 [Source:MGI Symbol;Acc:MGI:1923734]	-	-
ENSMUSG00000047735	1638.09	1502.05	1646.9	1563.7	1151.52	1146.45	1128.15	1015.06	1396.88	1006.56	1500.45	1138.62	0.398042	0.0091792	0.18669	Samd9l	6	3372257	3399572	-	5427	protein_coding	sterile alpha motif domain containing 9-like [Source:MGI Symbol;Acc:MGI:1343184]	-	-
ENSMUSG00000025089	10.6832	25.0502	19.9503	25.4951	6.76227	136.103	37.5407	58.8443	23.5926	9.61124	17.5882	53.1384	-1.59236	0.0092017	0.186982	Gfra1	19	58235604	58455909	-	5476	protein_coding	glial cell line derived neurotrophic factor family receptor alpha 1 [Source:MGI Symbol;Acc:MGI:1100842]	-	-
ENSMUSG00000026833	734.767	697.551	679.307	924.198	805.676	710.319	546.747	441.332	616.356	532.987	768.3	569.548	0.431943	0.00921155	0.187018	Olfm1	2	28192992	28230736	+	3553	protein_coding	olfactomedin 1 [Source:MGI Symbol;Acc:MGI:1860437]	-	-
ENSMUSG00000086515	0	0.963468	0	0	0	10.928	4.81291	6.86517	2.94907	0	0.192694	5.11103	-4.17056	0.00924568	0.187394	Erich2os	2	70503433	70509199	-	608	antisense	glutamate rich 2, opposite strand [Source:MGI Symbol;Acc:MGI:3826593]	-	-
ENSMUSG00000071226	193.485	170.534	173.567	147.659	170.989	197.697	220.431	234.396	274.264	227.175	171.247	230.793	-0.431242	0.00924633	0.187394	Cecr2	6	120666369	120771190	+	17082	protein_coding	CECR2, histone acetyl-lysine reader [Source:MGI Symbol;Acc:MGI:1923799]	-	-
ENSMUSG00000014846	225.534	182.095	231.423	233.705	287.88	984.513	423.536	618.846	131.725	218.437	232.128	475.411	-1.03399	0.00926686	0.187646	Tppp3	8	105467493	105471526	-	1848	protein_coding	tubulin polymerization-promoting protein family member 3 [Source:MGI Symbol;Acc:MGI:1915221]	-	-
ENSMUSG00000029830	0	0.963468	2.99254	8.49837	6.76227	24.8363	8.66324	27.4607	21.6265	3.495	3.84333	17.2164	-2.15271	0.00928853	0.18792	Svopl	6	37983739	38046996	-	5814	protein_coding	SV2 related protein homolog (rat)-like [Source:MGI Symbol;Acc:MGI:2444335]	-	-
ENSMUSG00000062510	97.3358	100.201	79.8011	98.7936	144.906	118.221	204.067	143.188	180.877	150.285	104.207	159.328	-0.611508	0.0093252	0.188371	Nsl1	1	191063012	191086474	+	5303	protein_coding	NSL1, MIS12 kinetochore complex component [Source:MGI Symbol;Acc:MGI:2685830]	-	-
ENSMUSG00000029436	263.519	277.479	241.398	161.469	238.612	193.723	154.976	186.34	85.5231	137.179	236.495	151.548	0.642439	0.00932715	0.188371	Mmp17	5	129584169	129611099	+	6619	protein_coding	matrix metallopeptidase 17 [Source:MGI Symbol;Acc:MGI:1346076]	-	-
ENSMUSG00000017446	2028.62	706.222	833.922	598.073	779.593	727.208	593.913	434.467	355.855	685.02	989.286	559.293	0.822227	0.00935372	0.188489	C1qtnf1	11	118428203	118449963	+	3131	protein_coding	C1q and tumor necrosis factor related protein 1 [Source:MGI Symbol;Acc:MGI:1919254]	-	-
ENSMUSG00000057454	0	0	2.99254	11.6853	14.4906	18.8756	17.3265	33.3451	28.5077	22.7175	5.83368	24.1545	-2.0416	0.00935487	0.188489	Lypd3	7	24636550	24641118	+	1649	protein_coding	Ly6/Plaur domain containing 3 [Source:MGI Symbol;Acc:MGI:1919684]	-	-
ENSMUSG00000040247	15.4313	12.5251	32.918	15.9344	27.0491	32.784	66.4182	36.2873	56.0324	27.96	20.7716	43.8964	-1.07486	0.00935937	0.188489	Tbc1d10c	19	4184358	4191047	-	1758	protein_coding	TBC1 domain family, member 10c [Source:MGI Symbol;Acc:MGI:1922072]	-	-
ENSMUSG00000044349	55.79	191.73	358.108	202.899	347.774	508.648	383.108	598.25	496.427	273.484	231.26	451.983	-0.965368	0.00936565	0.188489	Snhg11	2	158375638	158386145	+	8521	protein_coding	small nucleolar RNA host gene 11 [Source:MGI Symbol;Acc:MGI:2441845]	-	-
ENSMUSG00000043441	0	0	5.98509	0	3.86416	12.9149	9.62582	18.634	11.7963	5.2425	1.96985	11.6427	-2.53614	0.00938678	0.188749	Gpr149	3	62529077	62605140	-	4288	protein_coding	G protein-coupled receptor 149 [Source:MGI Symbol;Acc:MGI:2443628]	-	-
ENSMUSG00000035208	178.053	168.607	235.413	173.154	136.211	147.031	121.285	129.457	110.099	110.092	178.288	123.593	0.529027	0.00940149	0.188881	Slfn8	11	83002158	83020810	-	4091	protein_coding	schlafen 8 [Source:MGI Symbol;Acc:MGI:2672859]	-	-
ENSMUSG00000029049	30.8626	41.4291	57.8558	47.8033	53.1321	121.201	74.1188	73.5554	102.235	43.6875	46.2166	82.9595	-0.839391	0.00943359	0.189254	Morn1	4	155086577	155145505	+	4320	protein_coding	MORN repeat containing 1 [Source:MGI Symbol;Acc:MGI:1924116]	-	-
ENSMUSG00000029026	16.6183	8.67121	16.9577	0	2.89812	236.442	48.1291	26.4799	9.83025	11.3587	9.02908	66.448	-2.88163	0.00943645	0.189254	Trp73	4	154056253	154140208	-	5534	protein_coding	transformation related protein 73 [Source:MGI Symbol;Acc:MGI:1336991]	-	-
ENSMUSG00000047671	0	2.8904	18.9528	2.12459	1.93208	230.481	28.8775	40.2103	2.94907	1.7475	5.17997	60.8531	-3.54947	0.00949914	0.190346	Tctex1d4	4	117126794	117128738	+	1111	protein_coding	Tctex1 domain containing 4 [Source:MGI Symbol;Acc:MGI:3045358]	-	-
ENSMUSG00000033318	157.874	176.315	262.346	163.594	265.661	556.334	212.731	446.236	248.705	263.872	205.158	345.576	-0.751096	0.00955952	0.191307	Gstt2	10	75831114	75837424	-	4156	protein_coding	glutathione S-transferase, theta 2 [Source:MGI Symbol;Acc:MGI:106188]	-	-
ENSMUSG00000087416	0	0	0	0	0	15.8953	1.92516	6.86517	0	0.87375	0	5.11187	-4.74879	0.00956367	0.191307	Gm15906	4	129135091	129136910	+	323	lincRNA	predicted gene 15906 [Source:MGI Symbol;Acc:MGI:3801906]	-	-
ENSMUSG00000000731	0	4.81734	0.997514	0	7.72831	9.93454	15.4013	21.5762	14.7454	6.11625	2.70863	13.5547	-2.29	0.0095738	0.191343	Aire	10	78030022	78043610	-	3825	protein_coding	autoimmune regulator (autoimmune polyendocrinopathy candidiasis ectodermal dystrophy) [Source:MGI Symbol;Acc:MGI:1338803]	PHD	PHD
ENSMUSG00000044468	886.706	654.195	711.228	678.807	614.401	1416.67	827.821	983.68	762.827	1005.69	709.067	999.336	-0.495473	0.0096015	0.191666	Tent5c	3	100451628	100489324	-	6097	protein_coding	terminal nucleotidyltransferase 5C [Source:MGI Symbol;Acc:MGI:1921895]	-	-
ENSMUSG00000026303	11.8702	6.74428	48.8782	27.6197	21.2529	254.324	20.2142	81.4013	25.5586	19.2225	23.2731	80.1442	-1.78203	0.00960657	0.191666	Mlph	1	90915085	90951142	+	5357	protein_coding	melanophilin [Source:MGI Symbol;Acc:MGI:2176380]	-	-
ENSMUSG00000106466	0	0	0.997514	6.37378	3.86416	146.038	22.1394	44.1332	0	1.7475	2.24709	42.8116	-4.24947	0.00962259	0.19182	Gm40348	5	137166450	137172662	+	452	lincRNA	predicted gene, 40348 [Source:MGI Symbol;Acc:MGI:5623233]	-	-
ENSMUSG00000024206	53.416	68.4062	40.8981	94.5444	53.1321	239.422	99.146	131.419	54.0663	89.1224	62.0794	122.635	-0.98181	0.00966408	0.192481	Rfx2	17	56775897	56831013	-	7311	protein_coding	regulatory factor X, 2 (influences HLA class II expression) [Source:MGI Symbol;Acc:MGI:106583]	-	-
ENSMUSG00000050122	0	6.74428	8.97763	1.0623	3.86416	216.573	27.9149	61.7865	1.96605	0	4.12967	61.6481	-3.89344	0.00968252	0.192682	Vwa3b	1	37026596	37187613	+	5386	protein_coding	von Willebrand factor A domain containing 3B [Source:MGI Symbol;Acc:MGI:1918103]	-	-
ENSMUSG00000039187	111.58	57.8081	68.8285	90.2952	76.3171	161.933	127.061	94.1509	124.844	121.451	80.9658	125.888	-0.640725	0.00969768	0.192818	Fanci	7	79391929	79450264	+	5774	protein_coding	Fanconi anemia, complementation group I [Source:MGI Symbol;Acc:MGI:2384790]	-	-
ENSMUSG00000032281	28235.7	19914.9	23440.6	19194.6	28460.5	11695.9	19096.7	14761.1	18227.2	21094.9	23849.3	16975.2	0.490499	0.00976271	0.193943	Acsbg1	9	54604877	54661870	-	3604	protein_coding	acyl-CoA synthetase bubblegum family member 1 [Source:MGI Symbol;Acc:MGI:2385656]	-	-
ENSMUSG00000028707	0	0.963468	0	0	0	25.8298	8.66324	1.96148	0	0	0.192694	7.2909	-4.68446	0.00979842	0.194486	Dmbx1	4	115915119	115939926	-	5856	protein_coding	diencephalon/mesencephalon homeobox 1 [Source:MGI Symbol;Acc:MGI:2153518]	HB-other	HB->HB-other
ENSMUSG00000015085	17.8053	39.5022	27.9304	40.3673	45.4038	245.383	37.5407	92.1894	49.1512	24.465	34.2018	89.7459	-1.38851	0.00983974	0.195138	Entpd2	2	25395874	25401321	+	2128	protein_coding	ectonucleoside triphosphate diphosphohydrolase 2 [Source:MGI Symbol;Acc:MGI:1096863]	-	-
ENSMUSG00000079235	8.30916	8.67121	6.9826	6.37378	11.5925	100.339	13.4762	21.5762	7.8642	7.86375	8.38584	30.2238	-1.84609	0.00986747	0.195481	Ccdc13	9	121797627	121839461	-	3418	protein_coding	coiled-coil domain containing 13 [Source:MGI Symbol;Acc:MGI:1920144]	-	-
ENSMUSG00000030739	30.8626	26.9771	82.7937	59.4886	52.1661	751.051	83.7447	218.705	41.287	33.2025	50.4576	225.598	-2.16009	0.00988296	0.195481	Myh14	7	44605803	44670843	-	7273	protein_coding	myosin, heavy polypeptide 14 [Source:MGI Symbol;Acc:MGI:1919210]	-	-
ENSMUSG00000086170	0	0	1.99503	1.0623	0	35.7643	2.88775	16.6725	0	0	0.611465	11.0649	-4.16826	0.00989012	0.195481	Gm12144	11	43229563	43232264	-	1292	antisense	predicted gene 12144 [Source:MGI Symbol;Acc:MGI:3649685]	-	-
ENSMUSG00000019817	1251.12	1276.6	1219.96	1595.57	1485.77	1241.82	1765.38	2464.6	2039.78	1984.29	1365.8	1899.17	-0.475621	0.00989089	0.195481	Plagl1	10	13060504	13131694	+	7819	protein_coding	pleiomorphic adenoma gene-like 1 [Source:MGI Symbol;Acc:MGI:1100874]	C2H2	C2H2
ENSMUSG00000037579	104.458	35.6483	49.8757	47.8033	46.3699	250.35	90.4827	136.323	60.9475	63.7837	56.831	120.377	-1.08591	0.00991971	0.195882	Kcnh3	15	99224861	99242817	+	5756	protein_coding	potassium voltage-gated channel, subfamily H (eag-related), member 3 [Source:MGI Symbol;Acc:MGI:1341723]	-	-
ENSMUSG00000049436	581.641	438.378	673.322	566.204	451.14	465.93	419.686	391.315	315.551	388.819	542.137	396.26	0.45185	0.00993783	0.196039	Upk1b	16	38773184	38800328	-	2089	protein_coding	uroplakin 1B [Source:MGI Symbol;Acc:MGI:98912]	-	-
ENSMUSG00000048416	223.16	358.41	462.847	421.732	333.283	614.948	545.784	443.294	503.309	479.688	359.886	517.405	-0.522717	0.00994464	0.196039	Mlf1	3	67374097	67400003	+	1719	protein_coding	myeloid leukemia factor 1 [Source:MGI Symbol;Acc:MGI:1341819]	-	-
ENSMUSG00000026322	1.18702	0.963468	9.97514	13.8099	1.93208	0.993454	0.962582	0	0	0	5.57351	0.391207	3.82958	0.00998199	0.196608	Htr4	18	62324204	62467802	+	4657	protein_coding	5 hydroxytryptamine (serotonin) receptor 4 [Source:MGI Symbol;Acc:MGI:109246]	-	-
ENSMUSG00000030677	299.13	281.333	224.441	368.617	390.28	273.2	562.148	384.449	604.56	605.508	312.76	485.973	-0.636088	0.00999396	0.196676	Kif22	7	127027729	127042471	-	4903	protein_coding	kinesin family member 22 [Source:MGI Symbol;Acc:MGI:109233]	-	-
ENSMUSG00000070780	1676.08	1927.9	1445.4	1372.49	1062.64	1202.08	912.528	892.472	1348.71	961.998	1496.9	1063.56	0.4931	0.0100327	0.197158	Rbm47	5	66016549	66173118	-	7163	protein_coding	RNA binding motif protein 47 [Source:MGI Symbol;Acc:MGI:2384294]	-	-
ENSMUSG00000024056	250.462	159.936	126.684	202.899	171.955	151.998	297.438	248.127	405.006	395.809	182.387	299.676	-0.718211	0.0100356	0.197158	Ndc80	17	71496100	71526857	-	6493	protein_coding	NDC80 kinetochore complex component [Source:MGI Symbol;Acc:MGI:1914302]	-	-
ENSMUSG00000042567	43.9198	20.2328	53.8658	25.4951	68.5888	478.845	184.816	177.514	15.7284	34.95	42.4205	178.371	-2.07165	0.0100454	0.197183	Nek10	14	14803415	15012059	+	11849	protein_coding	NIMA (never in mitosis gene a)- related kinase 10 [Source:MGI Symbol;Acc:MGI:2685128]	-	-
ENSMUSG00000032661	85.4656	20.2328	62.8434	14.8721	23.1849	4.96727	18.2891	23.5377	13.7623	14.8537	41.3198	15.082	1.44979	0.0100915	0.197921	Oas3	5	120753098	120777661	-	7069	protein_coding	2'-5' oligoadenylate synthetase 3 [Source:MGI Symbol;Acc:MGI:2180850]	-	-
ENSMUSG00000011382	2033.37	1089.68	1286.79	890.204	883.926	839.468	900.014	676.709	918.145	777.637	1236.79	822.395	0.588294	0.0101068	0.198053	Dhdh	7	45470987	45488805	-	7408	protein_coding	dihydrodiol dehydrogenase (dimeric) [Source:MGI Symbol;Acc:MGI:1919005]	-	-
ENSMUSG00000100826	117.515	144.52	127.682	123.226	127.517	101.332	245.458	208.897	245.756	190.477	128.092	198.384	-0.630557	0.0101735	0.199191	Snhg14	7	59307924	59975759	-	26093	processed_transcript	small nucleolar RNA host gene 14 [Source:MGI Symbol;Acc:MGI:1289201]	-	-
ENSMUSG00000075002	0	5.78081	0	29.7443	25.117	33.7774	74.1188	125.534	82.5741	106.597	12.1284	84.5205	-2.7992	0.0102358	0.20024	Gm813	16	58613675	58616978	-	713	protein_coding	predicted gene 813 [Source:MGI Symbol;Acc:MGI:2685659]	-	-
ENSMUSG00000027938	20.1794	37.5753	88.7788	29.7443	32.8453	288.102	48.1291	191.244	40.304	27.0862	41.8246	118.973	-1.50582	0.0102516	0.200379	Creb3l4	3	90237500	90243512	-	1679	protein_coding	cAMP responsive element binding protein 3-like 4 [Source:MGI Symbol;Acc:MGI:1916603]	bZIP	bZIP
ENSMUSG00000032400	150.752	153.191	108.729	230.518	156.498	135.11	275.299	231.454	404.023	281.347	159.938	265.447	-0.731411	0.0103008	0.201171	Zwilch	9	64137144	64173104	-	4283	protein_coding	zwilch kinetochore protein [Source:MGI Symbol;Acc:MGI:1915264]	-	-
ENSMUSG00000073485	10.6832	10.5981	14.9627	11.6853	22.2189	25.8298	30.8026	22.557	30.4738	34.0762	14.0296	28.7479	-1.03009	0.0103656	0.202265	H3f3aos	1	180813776	180816859	+	3044	antisense	H3 histone, family 3A, opposite strand [Source:MGI Symbol;Acc:MGI:3802006]	-	-
ENSMUSG00000028587	40.3588	38.5387	46.8832	46.741	55.0642	41.7251	76.044	80.4205	109.116	78.6375	45.5172	77.1886	-0.761043	0.0103829	0.202432	Orc1	4	108579423	108614833	+	3479	protein_coding	origin recognition complex, subunit 1 [Source:MGI Symbol;Acc:MGI:1328337]	-	-
ENSMUSG00000058022	3.56107	0	2.99254	0	4.83019	20.8625	10.5884	14.7111	2.94907	8.7375	2.27676	11.5697	-2.34806	0.0104061	0.202498	Adtrp	13	41763148	41847684	-	2866	protein_coding	androgen dependent TFPI regulating protein [Source:MGI Symbol;Acc:MGI:1924596]	-	-
ENSMUSG00000015837	12683.3	10424.7	9839.48	8437.82	11787.6	6912.45	7392.63	9206.19	7925.14	9204.95	10634.6	8128.27	0.387705	0.010418	0.202498	Sqstm1	11	50199366	50210827	-	3356	protein_coding	sequestosome 1 [Source:MGI Symbol;Acc:MGI:107931]	-	-
ENSMUSG00000038304	7.12213	23.1232	27.9304	13.8099	22.2189	41.7251	39.4659	30.4029	48.1682	33.2025	18.8409	38.5929	-1.0231	0.0104208	0.202498	Cd160	3	96798763	96829351	-	2642	protein_coding	CD160 antigen [Source:MGI Symbol;Acc:MGI:1860383]	-	-
ENSMUSG00000046338	0	7.70774	8.97763	5.31148	3.86416	30.7971	9.62582	7.84591	26.5417	15.7275	5.1722	18.1076	-1.79088	0.0104214	0.202498	Gpat2	2	127425199	127436092	+	2628	protein_coding	glycerol-3-phosphate acyltransferase 2, mitochondrial [Source:MGI Symbol;Acc:MGI:2684962]	-	-
ENSMUSG00000002325	992.351	974.066	1033.42	944.381	844.318	754.031	821.083	803.225	738.251	802.102	957.708	783.738	0.288939	0.0104839	0.203434	Irf9	14	55603571	55610030	+	5386	protein_coding	interferon regulatory factor 9 [Source:MGI Symbol;Acc:MGI:107587]	-	-
ENSMUSG00000027525	0	9.63468	0	0	7.72831	7.94763	13.4762	32.3644	9.83025	34.0762	3.4726	19.5389	-2.47055	0.0104901	0.203434	Phactr3	2	178118975	178338492	+	6407	protein_coding	phosphatase and actin regulator 3 [Source:MGI Symbol;Acc:MGI:1921439]	-	-
ENSMUSG00000083407	0	0	0	2.12459	0	9.93454	3.85033	1.96148	2.94907	7.86375	0.424919	5.31183	-3.65356	0.010496	0.203434	Gm13176	2	4834136	4834612	-	477	processed_pseudogene	predicted gene 13176 [Source:MGI Symbol;Acc:MGI:3651289]	-	-
ENSMUSG00000063428	41.5458	41.4291	50.8732	36.1181	31.8793	450.035	102.996	162.803	23.5926	24.465	40.3691	152.778	-1.91983	0.0105245	0.203801	Ddo	10	40630011	40681847	+	8925	protein_coding	D-aspartate oxidase [Source:MGI Symbol;Acc:MGI:1925528]	-	-
ENSMUSG00000000730	18.9924	27.9406	5.98509	26.5574	12.5585	23.8429	40.4285	41.191	45.2191	48.93	18.4068	39.9223	-1.11965	0.0105326	0.203801	Dnmt3l	10	78041947	78063622	+	2988	protein_coding	DNA (cytosine-5-)-methyltransferase 3-like [Source:MGI Symbol;Acc:MGI:1859287]	-	-
ENSMUSG00000085523	0	2.8904	2.99254	1.0623	2.89812	2.98036	1.92516	12.7496	25.5586	11.3587	1.96867	10.9145	-2.44435	0.010544	0.203851	Gm15945	15	75661407	75663529	+	810	antisense	predicted gene 15945 [Source:MGI Symbol;Acc:MGI:3801876]	-	-
ENSMUSG00000029012	449.881	531.834	534.668	649.063	481.087	548.386	665.144	760.072	761.844	781.132	529.307	703.316	-0.41006	0.0105812	0.204398	Orc5	5	22486485	22550429	-	6166	protein_coding	origin recognition complex, subunit 5 [Source:MGI Symbol;Acc:MGI:1347044]	-	-
ENSMUSG00000029608	4.74809	5.78081	2.99254	10.623	16.4227	35.7643	18.2891	22.557	17.6944	15.7275	8.11341	22.0065	-1.43125	0.0106018	0.204624	Rph3a	5	120940499	121010092	-	4639	protein_coding	rabphilin 3A [Source:MGI Symbol;Acc:MGI:102788]	-	-
ENSMUSG00000071392	0	1.92694	5.98509	3.18689	6.76227	65.5679	17.3265	19.6148	0	5.2425	3.57224	21.5503	-2.57936	0.0106394	0.205179	Ect2l	10	18128903	18210890	-	4257	protein_coding	epithelial cell transforming sequence 2 oncogene-like [Source:MGI Symbol;Acc:MGI:3641723]	-	-
ENSMUSG00000032418	85450.2	65249.9	36737.5	38543.3	17415.7	26209.3	20847.6	16471.5	39999.3	30065.7	48679.3	26718.7	0.865453	0.0106588	0.205383	Me1	9	86581371	86695953	-	3848	protein_coding	malic enzyme 1, NADP(+)-dependent, cytosolic [Source:MGI Symbol;Acc:MGI:97043]	-	-
ENSMUSG00000042804	834.477	659.012	657.362	274.072	604.74	428.179	380.22	400.141	347.008	412.41	605.933	393.591	0.6222	0.0106818	0.205509	Gpr153	4	152274232	152285337	+	3909	protein_coding	G protein-coupled receptor 153 [Source:MGI Symbol;Acc:MGI:1916157]	-	-
ENSMUSG00000045232	0	3.85387	0	1.0623	8.69435	17.8822	10.5884	31.3836	6.88117	6.11625	2.7221	14.5703	-2.39238	0.0106832	0.205509	Rln3	8	84042929	84045000	-	634	protein_coding	relaxin 3 [Source:MGI Symbol;Acc:MGI:2158015]	-	-
ENSMUSG00000091523	0	2.8904	0	0	1.93208	144.051	43.3162	36.2873	0	0	0.964496	44.7309	-5.5183	0.0107583	0.206731	AU040972	11	79481719	79484031	-	1042	antisense	expressed sequence AU040972 [Source:MGI Symbol;Acc:MGI:2144426]	-	-
ENSMUSG00000105359	32.0496	52.0273	43.8906	49.9279	53.1321	43.712	77.0066	68.6517	115.014	96.1124	46.2055	80.0993	-0.791425	0.0107646	0.206731	Rpl21-ps10	3	38107443	38107922	-	480	processed_pseudogene	ribosomal protein L21, pseudogene 10 [Source:MGI Symbol;Acc:MGI:3643358]	-	-
ENSMUSG00000034883	10.6832	16.379	26.9329	58.4263	31.8793	51.6596	61.6053	50.0176	57.0154	79.5112	28.8601	59.9618	-1.05408	0.0107859	0.206968	Lrr1	12	69168814	69179009	+	1500	protein_coding	leucine rich repeat protein 1 [Source:MGI Symbol;Acc:MGI:1916956]	-	-
ENSMUSG00000113186	7.12213	2.8904	4.98757	2.12459	1.93208	0	0.962582	0	0	0	3.81136	0.192516	3.85192	0.0108119	0.20714	A330076C08Rik	13	44185760	44216487	-	6641	lincRNA	RIKEN cDNA A330076C08 gene [Source:MGI Symbol;Acc:MGI:2443693]	-	-
ENSMUSG00000030123	8121.61	4844.32	4787.07	3949.62	3803.3	4547.04	3582.73	2591.11	3109.31	3326.36	5101.18	3431.31	0.57198	0.0108128	0.20714	Plxnd1	6	115954811	115995005	-	7301	protein_coding	plexin D1 [Source:MGI Symbol;Acc:MGI:2154244]	-	-
ENSMUSG00000113260	0	3.85387	0	0	0	3.97382	7.70066	9.80738	7.8642	6.11625	0.770774	7.09246	-3.14964	0.0108568	0.207809	Gm19428	13	65689613	65713454	-	2924	transcribed_processed_pseudogene	predicted gene, 19428 [Source:MGI Symbol;Acc:MGI:5011613]	-	-
ENSMUSG00000029248	0	0	0	0	4.83019	13.9084	11.551	16.6725	0	12.2325	0.966039	10.8729	-3.45616	0.0108861	0.208043	Thegl	5	77016023	77061529	+	2243	protein_coding	theg spermatid protein like [Source:MGI Symbol;Acc:MGI:1919118]	-	-
ENSMUSG00000029601	7.12213	3.85387	10.9727	4.24919	9.66039	112.26	20.2142	8.82664	12.7793	1.7475	7.17165	31.1656	-2.11687	0.010891	0.208043	Iqcd	5	120589016	120607118	+	1680	protein_coding	IQ motif containing D [Source:MGI Symbol;Acc:MGI:1922982]	-	-
ENSMUSG00000032292	0	0	0	4.24919	0	9.93454	0.962582	0.980738	11.7963	26.2125	0.849837	9.97733	-3.57327	0.0108965	0.208043	Nr2e3	9	59942771	59960659	-	3369	protein_coding	nuclear receptor subfamily 2, group E, member 3 [Source:MGI Symbol;Acc:MGI:1346317]	-	-
ENSMUSG00000102591	0	0.963468	0	3.18689	0	6.95418	10.5884	4.90369	4.91512	5.2425	0.830071	6.52078	-2.97872	0.0109051	0.208043	Gm38383	2	24588566	24591225	+	2660	TEC	predicted gene, 38383 [Source:MGI Symbol;Acc:MGI:5611611]	-	-
ENSMUSG00000055053	6361.25	4588.03	3766.61	3500.27	3482.57	3824.8	2931.06	2797.07	2957.92	3020.55	4339.75	3106.28	0.482314	0.0109266	0.208265	Nfic	10	81396186	81455635	-	6630	protein_coding	nuclear factor I/C [Source:MGI Symbol;Acc:MGI:109591]	-	-
ENSMUSG00000051391	4611.58	5703.73	4632.46	5223.31	4269.89	3814.86	3937.92	3762.11	4263.38	4046.33	4888.19	3964.92	0.302027	0.0109347	0.208265	Ywhag	5	135908409	135934616	-	5500	protein_coding	tyrosine 3-monooxygenase/tryptophan 5-monooxygenase activation protein, gamma polypeptide [Source:MGI Symbol;Acc:MGI:108109]	-	-
ENSMUSG00000035314	835.664	751.505	780.056	741.483	448.242	652.699	373.482	416.814	533.782	478.815	711.39	491.118	0.534345	0.0109553	0.208382	Gdpd5	7	99381414	99461877	+	6739	protein_coding	glycerophosphodiester phosphodiesterase domain containing 5 [Source:MGI Symbol;Acc:MGI:2686926]	-	-
ENSMUSG00000039037	3.56107	3.85387	0	3.18689	4.83019	22.8494	14.4387	16.6725	1.96605	9.61124	3.0864	13.1076	-2.08558	0.0109589	0.208382	St6galnac5	3	152817081	152982246	-	6002	protein_coding	ST6 (alpha-N-acetyl-neuraminyl-2,3-beta-galactosyl-1,3)-N-acetylgalactosaminide alpha-2,6-sialyltransferase 5 [Source:MGI Symbol;Acc:MGI:1349471]	-	-
ENSMUSG00000028917	1154.97	1160.02	1073.33	922.073	1354.39	808.671	918.304	921.894	860.146	946.271	1132.95	891.057	0.346554	0.0109758	0.208531	Plekhm2	4	141625734	141664899	-	5186	protein_coding	pleckstrin homology domain containing, family M (with RUN domain) member 2 [Source:MGI Symbol;Acc:MGI:1916832]	-	-
ENSMUSG00000046949	1302.16	1408.59	1063.35	1035.74	837.556	659.653	823.008	743.4	960.415	930.543	1129.48	823.404	0.455686	0.010998	0.208781	Nqo2	13	33964687	33988443	+	4042	protein_coding	N-ribosyldihydronicotinamide quinone reductase 2 [Source:MGI Symbol;Acc:MGI:104513]	-	-
ENSMUSG00000048442	18.9924	7.70774	29.9254	3.18689	23.1849	174.848	55.8298	87.2857	12.7793	1.7475	16.5995	66.498	-2.00097	0.0110576	0.20974	Smim5	11	115899966	115906269	+	1649	protein_coding	small integral membrane protein 5 [Source:MGI Symbol;Acc:MGI:1913778]	-	-
ENSMUSG00000050107	135.321	58.7715	43.8906	91.3575	75.351	110.273	103.959	162.803	153.352	159.022	80.9382	137.882	-0.77338	0.0111028	0.210424	Haspin	11	73135485	73138294	-	2810	protein_coding	histone H3 associated protein kinase [Source:MGI Symbol;Acc:MGI:1194498]	-	-
ENSMUSG00000026424	5.93511	2.8904	7.98011	2.12459	0.966039	0.993454	0	0	0	0	3.97925	0.198691	3.91702	0.0111409	0.210974	Gpr37l1	1	135160234	135167681	-	2269	protein_coding	G protein-coupled receptor 37-like 1 [Source:MGI Symbol;Acc:MGI:1928503]	-	-
ENSMUSG00000105547	0	0.963468	0	2.12459	2.89812	9.93454	7.70066	5.88443	2.94907	10.485	1.19724	7.39074	-2.60346	0.0111814	0.211568	Iglc3	16	19065230	19065681	-	452	IG_C_gene	immunoglobulin lambda constant 3 [Source:MGI Symbol;Acc:MGI:99886]	-	-
ENSMUSG00000042265	4.74809	0.963468	24.9379	38.2427	20.2868	0.993454	6.73808	5.88443	0	3.495	17.8358	3.42219	2.38016	0.0112244	0.212206	Trem1	17	48232768	48246924	+	2996	protein_coding	triggering receptor expressed on myeloid cells 1 [Source:MGI Symbol;Acc:MGI:1930005]	-	-
ENSMUSG00000066000	62.9122	131.995	123.692	151.908	145.872	182.795	168.452	234.396	200.537	164.265	123.276	190.089	-0.621756	0.0112371	0.212273	Zfp979	4	147611937	147642513	-	4111	protein_coding	zinc finger protein 979 [Source:MGI Symbol;Acc:MGI:2148252]	C2H2	C2H2
ENSMUSG00000063447	0	0	0	0	1.93208	40.7316	9.62582	0.980738	0	0	0.386416	10.2676	-4.60173	0.0112794	0.212897	Ube2d2b	5	107830099	107831776	+	1678	protein_coding	ubiquitin-conjugating enzyme E2D 2B [Source:MGI Symbol;Acc:MGI:1920568]	-	-
ENSMUSG00000030342	486.679	1062.71	1214.97	975.188	950.582	2094.2	1122.37	2398.89	1058.72	1074.71	938.025	1549.78	-0.723992	0.0113485	0.214027	Cd9	6	125460266	125494791	-	2044	protein_coding	CD9 antigen [Source:MGI Symbol;Acc:MGI:88348]	-	-
novel.810	2483.25	1293.94	440.901	490.781	190.31	204.651	154.976	546.271	360.77	228.922	979.836	299.118	1.71173	0.0113701	0.214215	-	5	135623626	135628956	+	781	-	- && - && -	-	-
ENSMUSG00000063145	48.6679	97.3103	96.7589	99.8559	124.619	115.241	163.639	139.265	176.944	139.8	93.4424	146.978	-0.649758	0.011377	0.214215	Bbs5	2	69647171	69667571	+	2445	protein_coding	Bardet-Biedl syndrome 5 (human) [Source:MGI Symbol;Acc:MGI:1919819]	-	-
ENSMUSG00000027496	217.225	184.022	167.582	235.83	282.083	237.435	384.07	222.628	390.261	402.799	217.349	327.439	-0.591657	0.0114488	0.215391	Aurka	2	172356190	172370535	-	2531	protein_coding	aurora kinase A [Source:MGI Symbol;Acc:MGI:894678]	-	-
ENSMUSG00000112571	185.175	9.63468	48.8782	16.9967	28.0151	23.8429	16.3639	23.5377	14.7454	14.8537	57.74	18.6687	1.62542	0.011466	0.215538	Gm48207	10	105532984	105534493	-	1510	TEC	predicted gene, 48207 [Source:MGI Symbol;Acc:MGI:6097599]	-	-
ENSMUSG00000039883	385.782	464.392	612.474	595.948	615.367	562.295	710.386	882.664	722.523	828.315	534.793	741.237	-0.470513	0.0115189	0.216357	Lrrc17	5	21543559	21575904	+	3608	protein_coding	leucine rich repeat containing 17 [Source:MGI Symbol;Acc:MGI:1921761]	-	-
ENSMUSG00000055555	55.79	55.8811	117.707	89.2329	56.9963	27.8167	49.0917	26.4799	31.4568	64.6575	75.1214	39.9005	0.909936	0.0115395	0.216453	4930502E18Rik	X	53724826	53738441	+	1427	protein_coding	RIKEN cDNA 4930502E18 gene [Source:MGI Symbol;Acc:MGI:1922263]	-	-
ENSMUSG00000117128	1.18702	0.963468	0	0	0.966039	3.97382	2.88775	2.94221	8.84722	8.7375	0.623306	5.4777	-3.14838	0.0115428	0.216453	AC165960.2	17	53496081	53500946	-	558	antisense	novel transcript, antisense to Rab5a	-	-
ENSMUSG00000030154	0	2.8904	1.99503	5.31148	1.93208	30.7971	14.4387	11.7689	11.7963	0	2.4258	13.7602	-2.49213	0.0115968	0.21729	Klrb1f	6	129045901	129057464	+	2025	protein_coding	killer cell lectin-like receptor subfamily B member 1F [Source:MGI Symbol;Acc:MGI:2442965]	-	-
ENSMUSG00000032595	1.18702	3.85387	44.8881	4.24919	6.76227	436.126	70.2685	89.2472	10.8133	0.87375	12.1881	121.466	-3.31487	0.0116273	0.217552	Cdhr4	9	107992497	107999684	+	3084	protein_coding	cadherin-related family member 4 [Source:MGI Symbol;Acc:MGI:1916648]	-	-
ENSMUSG00000038859	213.664	163.79	241.398	251.764	200.936	398.375	281.074	341.297	219.214	292.706	214.31	306.533	-0.51671	0.0116297	0.217552	Baiap2l1	5	144264526	144358112	-	3366	protein_coding	BAI1-associated protein 2-like 1 [Source:MGI Symbol;Acc:MGI:1914148]	-	-
ENSMUSG00000075706	3462.54	3352.87	3632.95	4355.41	3025.63	2386.28	2958.98	2353.77	3108.32	2989.1	3565.88	2759.29	0.369866	0.0116519	0.217791	Gpx4	10	80047166	80056439	+	1724	protein_coding	glutathione peroxidase 4 [Source:MGI Symbol;Acc:MGI:104767]	-	-
ENSMUSG00000025069	13.0572	6.74428	1.99503	8.49837	11.5925	40.7316	12.5136	32.3644	13.7623	16.6012	8.37748	23.1946	-1.47512	0.0116672	0.217901	Gsto2	19	47865545	47886324	+	1551	protein_coding	glutathione S-transferase omega 2 [Source:MGI Symbol;Acc:MGI:1915464]	-	-
ENSMUSG00000007950	854.656	778.482	746.141	690.493	773.797	737.143	603.539	407.987	591.781	511.143	768.714	570.319	0.430728	0.0117187	0.218686	Abhd8	8	71456705	71463655	-	4079	protein_coding	abhydrolase domain containing 8 [Source:MGI Symbol;Acc:MGI:1918946]	-	-
ENSMUSG00000100334	0	0	0	0	0	0.993454	0	1.96148	14.7454	6.11625	0	4.76331	-4.64949	0.011796	0.219951	C230024C17Rik	1	153721240	153737829	-	3337	lincRNA	RIKEN cDNA C230024C17 gene [Source:MGI Symbol;Acc:MGI:5439413]	-	-
ENSMUSG00000021257	208.916	144.52	202.495	140.223	150.702	259.291	246.421	220.666	249.688	199.215	169.371	235.056	-0.47392	0.0118144	0.220116	Angel1	12	86700502	86726460	-	4463	protein_coding	angel homolog 1 [Source:MGI Symbol;Acc:MGI:1915987]	-	-
ENSMUSG00000107667	0	0	0	1.0623	0	1.98691	0	13.7303	3.9321	5.2425	0.212459	4.97837	-4.13569	0.011831	0.220133	C530044C16Rik	6	50776115	50815033	+	1810	lincRNA	RIKEN cDNA C530044C16 gene [Source:MGI Symbol;Acc:MGI:2443109]	-	-
ENSMUSG00000020021	178.053	158.972	213.468	330.374	198.038	348.702	361.931	285.395	292.941	285.716	215.781	314.937	-0.545665	0.0118344	0.220133	Fgd6	10	94036001	94145339	+	8241	protein_coding	FYVE, RhoGEF and PH domain containing 6 [Source:MGI Symbol;Acc:MGI:1261419]	-	-
ENSMUSG00000032883	480.744	514.492	447.884	481.22	552.574	765.953	545.784	581.578	621.272	664.05	495.383	635.727	-0.359567	0.0118459	0.22017	Acsl3	1	78657825	78707743	+	4357	protein_coding	acyl-CoA synthetase long-chain family member 3 [Source:MGI Symbol;Acc:MGI:1921455]	-	-
ENSMUSG00000031266	497.362	331.433	260.351	256.013	327.487	258.298	220.431	160.841	242.807	246.397	334.529	225.755	0.56611	0.011872	0.220417	Gla	X	134588149	134601125	-	3265	protein_coding	galactosidase, alpha [Source:MGI Symbol;Acc:MGI:1347344]	-	-
ENSMUSG00000027460	267.08	171.497	163.592	176.341	224.121	75.5025	123.211	152.995	164.165	136.305	200.526	130.436	0.619074	0.0118783	0.220417	Angpt4	2	151911210	151945337	+	2335	protein_coding	angiopoietin 4 [Source:MGI Symbol;Acc:MGI:1336887]	-	-
ENSMUSG00000078796	0	0	7.98011	7.43607	0.966039	19.8691	12.5136	10.7881	7.8642	25.3387	3.27645	15.2747	-2.2189	0.011922	0.22086	Zfp541	7	16061814	16096334	+	4879	protein_coding	zinc finger protein 541 [Source:MGI Symbol;Acc:MGI:3647699]	C2H2	C2H2
ENSMUSG00000041168	4989.05	4644.88	4106.77	3893.32	3550.19	3660.88	3229.46	2281.2	3591.97	3180.45	4236.84	3188.79	0.409921	0.0119232	0.22086	Lonp1	17	56614297	56626887	-	4374	protein_coding	lon peptidase 1, mitochondrial [Source:MGI Symbol;Acc:MGI:1921392]	-	-
ENSMUSG00000050592	340.675	411.401	325.19	522.65	619.231	425.198	720.012	869.915	580.968	761.91	443.829	671.6	-0.597327	0.0119309	0.22086	Fam78a	2	32050055	32084857	-	5973	protein_coding	family with sequence similarity 78, member A [Source:MGI Symbol;Acc:MGI:2443569]	-	-
ENSMUSG00000054065	7.12213	14.452	49.8757	11.6853	16.4227	175.841	30.8026	83.3627	23.5926	10.485	19.9116	64.8169	-1.69839	0.011954	0.221111	Pkp3	7	141078218	141090510	+	3616	protein_coding	plakophilin 3 [Source:MGI Symbol;Acc:MGI:1891830]	-	-
ENSMUSG00000022103	27.3015	49.1369	44.8881	42.4919	49.268	75.5025	67.3808	64.7287	64.8796	63.7837	42.6173	67.2551	-0.651796	0.0119747	0.221149	Gfra2	14	70890120	70979838	+	3539	protein_coding	glial cell line derived neurotrophic factor family receptor alpha 2 [Source:MGI Symbol;Acc:MGI:1195462]	-	-
ENSMUSG00000057346	106.832	60.6985	70.8235	42.4919	49.268	59.6072	26.9523	13.7303	36.3719	26.2125	66.0228	32.5749	1.01833	0.0119798	0.221149	Apol9a	15	77403789	77411135	-	5953	protein_coding	apolipoprotein L 9a [Source:MGI Symbol;Acc:MGI:3606001]	-	-
ENSMUSG00000037169	105.645	181.132	153.617	340.997	381.585	317.905	532.308	484.485	301.789	403.672	232.595	408.032	-0.810062	0.0119848	0.221149	Mycn	12	12936093	12941914	-	3295	protein_coding	v-myc avian myelocytomatosis viral related oncogene, neuroblastoma derived [Source:MGI Symbol;Acc:MGI:97357]	bHLH	bHLH
novel.22	11.8702	3.85387	12.9677	1.0623	12.5585	35.7643	30.8026	21.5762	29.4907	7.86375	8.46252	25.0995	-1.56786	0.0120101	0.221391	-	1	153382602	153386205	+	1744	-	- && sp|Q8VC26|TLCD2_MOUSE TLC domain-containing protein 2 OS=Mus musculus OX=10090 GN=Tlcd2 PE=2 SV=1 && -	-	-
ENSMUSG00000107371	0	0	0	0	0	0	4.81291	3.92295	3.9321	7.86375	0	4.10634	-4.43784	0.0120171	0.221391	Gm43784	5	118994561	118996996	-	2436	TEC	predicted gene 43784 [Source:MGI Symbol;Acc:MGI:5663921]	-	-
ENSMUSG00000020454	1116.99	1148.45	1092.28	1080.36	1238.46	1329.24	1265.8	1380.88	1412.61	1406.74	1135.31	1359.05	-0.259377	0.012073	0.222243	Eif4enif1	11	3202392	3244588	+	6370	protein_coding	eukaryotic translation initiation factor 4E nuclear import factor 1 [Source:MGI Symbol;Acc:MGI:1921453]	-	-
ENSMUSG00000036768	269.454	237.977	294.267	382.427	282.083	416.257	364.819	319.721	438.429	469.203	293.241	401.686	-0.454569	0.012108	0.222711	Kif15	9	122951046	123018733	+	11020	protein_coding	kinesin family member 15 [Source:MGI Symbol;Acc:MGI:1098258]	-	-
ENSMUSG00000027761	0	0	0	3.18689	1.93208	1.98691	13.4762	7.84591	4.91512	9.61124	1.02379	7.56707	-2.88264	0.0121576	0.223445	Aadac	3	60025717	60040160	+	1501	protein_coding	arylacetamide deacetylase [Source:MGI Symbol;Acc:MGI:1915008]	-	-
ENSMUSG00000006411	14.2443	17.3424	37.9055	9.56067	21.2529	184.782	49.0917	44.1332	10.8133	18.3487	20.0612	61.4339	-1.61124	0.012168	0.223457	Nectin4	1	171370099	171388598	+	3746	protein_coding	nectin cell adhesion molecule 4 [Source:MGI Symbol;Acc:MGI:1918990]	-	-
ENSMUSG00000100807	0	0.963468	0.997514	2.12459	8.69435	68.5483	1.92516	14.7111	1.96605	3.495	2.55599	18.1291	-2.80817	0.0122613	0.224993	Gm29521	9	101770369	101862489	-	4236	processed_transcript	predicted gene 29521 [Source:MGI Symbol;Acc:MGI:5580227]	-	-
ENSMUSG00000061080	43.9198	71.2966	80.7987	98.7936	124.619	156.966	188.666	143.188	115.014	97.8599	83.8855	140.339	-0.739059	0.0122903	0.225345	Lsamp	16	39984361	42181679	+	17213	protein_coding	limbic system-associated membrane protein [Source:MGI Symbol;Acc:MGI:1261760]	-	-
ENSMUSG00000048592	4.74809	4.81734	14.9627	13.8099	4.83019	6.95418	27.9149	40.2103	14.7454	34.0762	8.63364	24.7802	-1.52167	0.0123233	0.225684	Gm5946	X	150220716	150226021	-	2724	transcribed_processed_pseudogene	predicted gene 5946 [Source:MGI Symbol;Acc:MGI:3644989]	-	-
ENSMUSG00000032965	329.992	269.771	319.205	291.069	321.691	482.819	344.604	452.12	360.77	372.217	306.346	402.506	-0.39396	0.0123284	0.225684	Ift57	16	49699233	49765126	+	2862	protein_coding	intraflagellar transport 57 [Source:MGI Symbol;Acc:MGI:1921166]	-	-
ENSMUSG00000053063	93.7748	112.726	127.682	112.603	133.313	156.966	195.404	158.88	121.895	200.089	116.02	166.647	-0.521402	0.0123409	0.225735	Clec12a	6	129342691	129365303	+	5528	protein_coding	C-type lectin domain family 12, member a [Source:MGI Symbol;Acc:MGI:3040968]	-	-
ENSMUSG00000049649	5.93511	2.8904	0	15.9344	13.5245	10.928	16.3639	44.1332	27.5247	31.455	7.6569	26.081	-1.7701	0.012358	0.225868	Gpr3	4	133209340	133212536	-	2734	protein_coding	G-protein coupled receptor 3 [Source:MGI Symbol;Acc:MGI:101908]	-	-
ENSMUSG00000048240	134.134	119.47	77.8061	92.4198	102.4	175.841	176.153	133.38	149.42	130.189	105.246	152.997	-0.541072	0.0123796	0.226084	Gng7	10	80948624	81014945	-	3786	protein_coding	guanine nucleotide binding protein (G protein), gamma 7 [Source:MGI Symbol;Acc:MGI:95787]	-	-
ENSMUSG00000002504	1298.6	1053.07	1042.4	1079.29	1179.53	864.305	971.246	932.682	908.315	941.028	1130.58	923.515	0.291374	0.0124185	0.226616	Slc9a3r2	17	24639282	24650305	-	2257	protein_coding	solute carrier family 9 (sodium/hydrogen exchanger), member 3 regulator 2 [Source:MGI Symbol;Acc:MGI:1890662]	-	-
ENSMUSG00000078921	131.759	121.397	341.15	152.971	139.11	81.4632	118.398	135.342	67.8287	104.85	177.277	101.576	0.803752	0.0124531	0.227067	Tgtp2	11	49057194	49064206	-	2938	protein_coding	T cell specific GTPase 2 [Source:MGI Symbol;Acc:MGI:3710083]	-	-
ENSMUSG00000044337	224.347	252.429	290.277	276.197	286.914	315.918	442.788	492.331	302.772	305.812	266.033	371.924	-0.482512	0.012471	0.227187	Ackr3	1	90203980	90216751	+	3348	protein_coding	atypical chemokine receptor 3 [Source:MGI Symbol;Acc:MGI:109562]	-	-
novel.47	0	0	0	0	0	0	0.962582	13.7303	2.94907	5.2425	0	4.5769	-4.59186	0.0124859	0.227187	-	1	104656472	104658140	-	333	-	- && - && -	-	-
ENSMUSG00000087501	0	0.963468	2.99254	0	5.79623	4.96727	9.62582	19.6148	12.7793	5.2425	1.95045	10.4459	-2.38754	0.0124892	0.227187	Gm12116	11	33204055	33221477	+	2770	lincRNA	predicted gene 12116 [Source:MGI Symbol;Acc:MGI:3652289]	-	-
ENSMUSG00000029063	3677.39	4821.19	4221.48	4977.92	3820.68	3453.25	3137.06	2918.68	3850.51	3554.41	4303.73	3382.78	0.347419	0.0125519	0.228147	Nadk	4	155562378	155591001	+	3747	protein_coding	NAD kinase [Source:MGI Symbol;Acc:MGI:2183149]	-	-
ENSMUSG00000104213	11.8702	4.81734	21.9453	6.37378	19.3208	44.7054	39.4659	35.3066	16.7114	20.97	12.8655	31.4319	-1.28492	0.012585	0.22857	Ighd	12	113406604	113416324	-	1900	IG_C_gene	immunoglobulin heavy constant delta [Source:MGI Symbol;Acc:MGI:96447]	-	-
ENSMUSG00000048327	231.469	270.735	278.306	311.253	256	217.566	506.318	348.162	398.125	573.18	269.553	408.67	-0.600688	0.012628	0.22917	Ckap2l	2	129268210	129297212	-	3137	protein_coding	cytoskeleton associated protein 2-like [Source:MGI Symbol;Acc:MGI:1917716]	-	-
ENSMUSG00000089844	0	0.963468	0	0	0	0	1.92516	9.80738	1.96605	11.3587	0.192694	5.01147	-4.14865	0.0126497	0.229383	A530032D15Rik	1	85083069	85109853	-	1603	protein_coding	RIKEN cDNA A530032D15Rik gene [Source:MGI Symbol;Acc:MGI:3037746]	-	-
ENSMUSG00000007457	0	0	0	0	0	5.96072	0	3.92295	5.89815	4.36875	0	4.03011	-4.40761	0.0126597	0.229384	2310003L06Rik	5	87969459	87972870	+	1603	protein_coding	RIKEN cDNA 2310003L06 gene [Source:MGI Symbol;Acc:MGI:1921498]	-	-
ENSMUSG00000070366	0	0	0	0	0.966039	27.8167	0	4.90369	0	1.7475	0.193208	6.89358	-4.60359	0.012728	0.230442	Plpp4	7	129257031	129391412	+	1458	protein_coding	phospholipid phosphatase 4 [Source:MGI Symbol;Acc:MGI:2685936]	-	-
novel.1070	0	0	0	2.12459	0	0	8.66324	11.7689	3.9321	6.11625	0.424919	6.09609	-3.85145	0.0127509	0.230675	-	GL456212.1	69	5599	+	385	-	- && sp|Q921C6|IFI75_MUSCR Interferon-induced protein 75 OS=Mus caroli OX=10089 GN=Ifi75 PE=2 SV=1 && -	-	-
ENSMUSG00000072473	0	0	1.99503	0	0	102.326	16.3639	40.2103	0	0	0.399006	31.78	-6.23286	0.0127636	0.230725	1700024G13Rik	14	32376068	32388391	-	850	protein_coding	RIKEN cDNA 1700024G13 gene [Source:MGI Symbol;Acc:MGI:1914335]	-	-
ENSMUSG00000029442	78.3435	33.7214	57.8558	20.1836	41.5397	541.432	105.884	182.417	34.4059	30.5812	46.3288	178.944	-1.95015	0.0128217	0.231541	Wdr66	5	123252102	123327484	+	8961	protein_coding	WD repeat domain 66 [Source:MGI Symbol;Acc:MGI:1918495]	-	-
ENSMUSG00000104293	73.5954	5.78081	30.9229	10.623	16.4227	0.993454	9.62582	4.90369	10.8133	12.2325	27.469	7.71375	1.82252	0.0128374	0.231541	Gm38043	1	156583108	156588248	+	5141	TEC	predicted gene, 38043 [Source:MGI Symbol;Acc:MGI:5611271]	-	-
ENSMUSG00000004035	766.816	779.446	1110.23	867.896	744.816	619.915	628.566	661.998	669.44	719.97	853.841	659.978	0.371535	0.0128489	0.231541	Gstm7	3	107926334	107931817	-	1601	protein_coding	glutathione S-transferase, mu 7 [Source:MGI Symbol;Acc:MGI:1915562]	-	-
ENSMUSG00000097727	1.18702	2.8904	3.99006	5.31148	0.966039	12.9149	6.73808	10.7881	10.8133	9.61124	2.869	10.1731	-1.82158	0.0128575	0.231541	F630040K05Rik	17	45734506	45788594	+	5327	lincRNA	RIKEN cDNA F630040K05 gene [Source:MGI Symbol;Acc:MGI:4437734]	-	-
ENSMUSG00000111465	29.6756	11.5616	10.9727	15.9344	9.66039	0	9.62582	5.88443	3.9321	0.87375	15.5609	4.06322	1.93589	0.0128617	0.231541	Gm47113	9	121869496	121879936	+	9507	lincRNA	predicted gene, 47113 [Source:MGI Symbol;Acc:MGI:6095855]	-	-
ENSMUSG00000036202	923.503	987.555	978.561	1123.91	1143.79	1278.58	1342.8	1142.56	1212.07	1404.99	1031.46	1276.2	-0.307067	0.0128717	0.231541	Rif1	2	52072832	52122383	+	10504	protein_coding	replication timing regulatory factor 1 [Source:MGI Symbol;Acc:MGI:1098622]	-	-
ENSMUSG00000079588	3.56107	8.67121	26.9329	15.9344	9.66039	16.8887	38.5033	76.4976	13.7623	34.95	12.952	36.1204	-1.47481	0.012879	0.231541	Tmem182	1	40805601	40856887	+	2716	protein_coding	transmembrane protein 182 [Source:MGI Symbol;Acc:MGI:1923725]	-	-
ENSMUSG00000000031	89.0267	135.849	138.654	144.472	114.959	130.142	168.452	140.246	265.417	293.58	124.592	199.567	-0.679397	0.0130072	0.233665	H19	7	142575529	142578143	-	2460	lincRNA	H19, imprinted maternally expressed transcript [Source:MGI Symbol;Acc:MGI:95891]	-	-
ENSMUSG00000009210	0	3.85387	6.9826	5.31148	3.86416	177.828	45.2414	120.631	0	0	4.00242	68.7401	-4.09855	0.0130174	0.233665	Prr29	11	106365472	106377558	+	1724	protein_coding	proline rich 29 [Source:MGI Symbol;Acc:MGI:1922823]	-	-
ENSMUSG00000040498	14.2443	12.5251	0.997514	4.24919	9.66039	14.9018	25.9897	23.5377	20.6435	26.2125	8.33529	22.257	-1.42396	0.013075	0.234425	Igsf23	7	19937305	19950756	-	2263	protein_coding	immunoglobulin superfamily, member 23 [Source:MGI Symbol;Acc:MGI:1917330]	-	-
ENSMUSG00000000561	556.713	865.194	829.932	793.535	709.073	1242.81	921.191	1400.49	900.45	796.86	750.889	1052.36	-0.486374	0.01308	0.234425	Wdr77	3	105959369	105970037	+	4841	protein_coding	WD repeat domain 77 [Source:MGI Symbol;Acc:MGI:1917715]	-	-
ENSMUSG00000075302	7.12213	7.70774	13.9652	1.0623	5.79623	179.815	29.8401	38.2488	15.7284	0	7.13072	52.7265	-2.88465	0.0131034	0.234549	Erich2	2	70508819	70540884	+	2948	protein_coding	glutamate rich 2 [Source:MGI Symbol;Acc:MGI:1913998]	-	-
ENSMUSG00000000295	199.42	283.26	612.474	403.673	303.336	988.487	416.798	995.449	462.022	370.47	360.432	646.645	-0.842687	0.0131131	0.234549	Hddc2	10	31313383	31328204	+	3508	protein_coding	HD domain containing 2 [Source:MGI Symbol;Acc:MGI:1916942]	-	-
ENSMUSG00000037600	51.042	28.904	39.9006	35.0558	35.7434	151.005	50.0543	93.1701	56.0324	32.3287	38.1292	76.5181	-1.00585	0.0131282	0.234549	Kdf1	4	133518963	133530790	+	2379	protein_coding	keratinocyte differentiation factor 1 [Source:MGI Symbol;Acc:MGI:1916323]	-	-
ENSMUSG00000075297	4.74809	14.452	18.9528	32.9312	35.7434	36.7578	52.942	37.2681	57.0154	48.0562	21.3655	46.4079	-1.11304	0.013135	0.234549	H60b	10	22158586	22288849	+	1213	protein_coding	histocompatibility 60b [Source:MGI Symbol;Acc:MGI:3649078]	-	-
ENSMUSG00000019899	1241.63	777.519	888.785	919.949	1033.66	1615.36	1410.18	1445.61	939.771	1250.34	972.308	1332.25	-0.454733	0.0131378	0.234549	Lama2	10	26980036	27619758	-	16338	protein_coding	laminin, alpha 2 [Source:MGI Symbol;Acc:MGI:99912]	-	-
ENSMUSG00000040613	302.691	305.419	493.77	246.453	265.661	1224.93	376.37	820.878	309.653	295.327	322.799	605.431	-0.907001	0.0131625	0.23481	Apobec1	6	122577792	122602444	-	2702	protein_coding	apolipoprotein B mRNA editing enzyme, catalytic polypeptide 1 [Source:MGI Symbol;Acc:MGI:103298]	-	-
ENSMUSG00000040712	950.805	905.66	829.932	689.43	843.352	649.719	639.155	773.802	667.474	573.18	843.836	660.666	0.353168	0.0131934	0.234953	Camta2	11	70669463	70688105	-	5207	protein_coding	calmodulin binding transcription activator 2 [Source:MGI Symbol;Acc:MGI:2135957]	-	-
ENSMUSG00000022286	0	5.78081	33.9155	3.18689	2.89812	253.331	14.4387	134.361	8.84722	8.7375	9.15626	83.9431	-3.19332	0.0131976	0.234953	Grhl2	15	37233036	37363569	+	8613	protein_coding	grainyhead like transcription factor 2 [Source:MGI Symbol;Acc:MGI:2182543]	-	-
ENSMUSG00000028020	11.8702	19.2694	37.9055	42.4919	18.3547	107.293	46.204	37.2681	38.338	49.8037	25.9783	55.7813	-1.10003	0.0132165	0.234953	Glrb	3	80843599	80913660	-	4655	protein_coding	glycine receptor, beta subunit [Source:MGI Symbol;Acc:MGI:95751]	-	-
ENSMUSG00000040770	0	0	0	0	0	3.97382	4.81291	7.84591	0	3.495	0	4.02553	-4.40617	0.01322	0.234953	Il25	14	54932695	54935837	+	1064	protein_coding	interleukin 25 [Source:MGI Symbol;Acc:MGI:2155888]	-	-
ENSMUSG00000045160	243.34	369.972	279.304	351.62	338.114	153.985	229.095	184.379	249.688	284.842	316.47	220.398	0.521855	0.0132216	0.234953	Bola3	6	83349147	83360136	+	3211	protein_coding	bolA-like 3 (E. coli) [Source:MGI Symbol;Acc:MGI:1925903]	-	-
ENSMUSG00000115888	0	0	0	1.0623	0	0	0.962582	12.7496	2.94907	8.7375	0.212459	5.07975	-4.16662	0.0132316	0.234953	Gm31369	15	80431571	80438603	-	911	lincRNA	predicted gene, 31369 [Source:MGI Symbol;Acc:MGI:5590528]	-	-
ENSMUSG00000089639	51.042	6.74428	13.9652	6.37378	1.93208	0.993454	0	9.80738	0.983025	1.7475	16.0115	2.70627	2.56156	0.0132588	0.235141	Gm2862	15	25681798	25682125	+	328	processed_pseudogene	predicted gene 2862 [Source:MGI Symbol;Acc:MGI:3781038]	-	-
ENSMUSG00000030762	9.49618	3.85387	4.98757	12.7476	14.4906	16.8887	14.4387	44.1332	16.7114	25.3387	9.11515	23.5022	-1.36939	0.0132748	0.235141	Aqp8	7	123462291	123468004	+	1581	protein_coding	aquaporin 8 [Source:MGI Symbol;Acc:MGI:1195271]	-	-
ENSMUSG00000038181	574.519	487.515	506.737	419.607	549.676	487.786	402.359	276.568	373.549	303.191	507.611	368.691	0.461544	0.0132772	0.235141	Chpf2	5	24586741	24594556	+	5588	protein_coding	chondroitin polymerizing factor 2 [Source:MGI Symbol;Acc:MGI:1917522]	-	-
ENSMUSG00000064194	1.18702	0	10.9727	8.49837	2.89812	23.8429	8.66324	10.7881	29.4907	16.6012	4.71123	17.8772	-1.9205	0.0132877	0.235141	Zfp936	7	43114229	43192109	+	3274	protein_coding	zinc finger protein 936 [Source:MGI Symbol;Acc:MGI:3642994]	C2H2	C2H2
ENSMUSG00000031847	46.2939	12.5251	24.9379	9.56067	29.9472	140.077	49.0917	70.6132	22.6096	28.8337	24.6529	62.245	-1.3395	0.0132981	0.235141	1700030J22Rik	8	116969594	116978959	-	2996	protein_coding	RIKEN cDNA 1700030J22 gene [Source:MGI Symbol;Acc:MGI:1916778]	-	-
ENSMUSG00000005718	149.565	190.767	179.553	205.023	233.781	168.887	301.288	357.969	279.179	295.327	191.738	280.53	-0.548143	0.0133034	0.235141	Tfap4	16	4544661	4559854	-	2541	protein_coding	transcription factor AP4 [Source:MGI Symbol;Acc:MGI:103239]	bHLH	bHLH
ENSMUSG00000052273	0	12.5251	31.9205	6.37378	1.93208	621.902	119.36	134.361	3.9321	0	10.5503	175.911	-4.05779	0.013342	0.235643	Dnah3	7	119922671	120095280	-	14305	protein_coding	dynein, axonemal, heavy chain 3 [Source:MGI Symbol;Acc:MGI:2683040]	-	-
ENSMUSG00000098284	0	0.963468	0	6.37378	3.86416	4.96727	11.551	24.5185	11.7963	5.2425	2.24028	11.6151	-2.36629	0.0133965	0.23625	A330093E20Rik	18	45683487	45896509	-	2366	antisense	RIKEN cDNA A330093E20 gene [Source:MGI Symbol;Acc:MGI:2147325]	-	-
ENSMUSG00000028678	218.412	208.109	222.446	314.44	326.521	311.944	493.805	237.339	414.836	492.795	257.986	390.144	-0.596834	0.0133968	0.23625	Kif2c	4	117159639	117182639	-	4363	protein_coding	kinesin family member 2C [Source:MGI Symbol;Acc:MGI:1921054]	-	-
ENSMUSG00000013033	2689.79	2559.93	2652.39	2394.42	3917.29	1933.26	2142.71	2002.67	2322.89	2394.07	2842.76	2159.12	0.396891	0.0134508	0.236743	Adgrl1	8	83900105	83941954	+	8587	protein_coding	adhesion G protein-coupled receptor L1 [Source:MGI Symbol;Acc:MGI:1929461]	-	-
ENSMUSG00000022440	4819.31	3478.12	3640.93	2564.38	3406.25	1745.5	1950.19	2562.67	3281.34	2913.08	3581.8	2490.56	0.524106	0.0134608	0.236743	C1qtnf6	15	78523346	78531416	-	2702	protein_coding	C1q and tumor necrosis factor related protein 6 [Source:MGI Symbol;Acc:MGI:1919959]	-	-
ENSMUSG00000020388	1906.36	1714.97	2531.69	2972.3	3053.65	1973	2006.02	1675.1	1712.43	1399.75	2435.8	1753.26	0.474496	0.0134615	0.236743	Pdlim4	11	54054928	54069014	-	2560	protein_coding	PDZ and LIM domain 4 [Source:MGI Symbol;Acc:MGI:1353470]	Others	Others
ENSMUSG00000009350	0	0	0	0	0.966039	0.993454	13.4762	3.92295	6.88117	0	0.193208	5.05475	-4.1562	0.0134759	0.236743	Mpo	11	87793581	87804413	+	3424	protein_coding	myeloperoxidase [Source:MGI Symbol;Acc:MGI:97137]	-	-
ENSMUSG00000117232	5.93511	0.963468	0	1.0623	5.79623	7.94763	9.62582	8.82664	14.7454	14.8537	2.75142	11.1998	-2.04387	0.013476	0.236743	CT030665.2	16	95756541	95929077	-	2822	lincRNA	novel transcript	-	-
ENSMUSG00000037474	268.267	264.954	215.463	450.414	293.676	419.237	429.312	305.01	507.241	552.21	298.555	442.602	-0.568561	0.0134913	0.236831	Dtl	1	191537356	191575544	-	13709	protein_coding	denticleless E3 ubiquitin protein ligase [Source:MGI Symbol;Acc:MGI:1924093]	-	-
ENSMUSG00000031340	14.2443	24.0867	21.9453	23.3705	26.0831	15.8953	39.4659	84.3435	59.9645	34.95	21.946	46.9238	-1.09203	0.0135931	0.238273	Gabre	X	72255999	72274803	-	4736	protein_coding	gamma-aminobutyric acid (GABA) A receptor, subunit epsilon [Source:MGI Symbol;Acc:MGI:1330235]	-	-
ENSMUSG00000020990	15.4313	22.1598	138.654	33.9935	37.6755	832.514	109.734	373.661	26.5417	25.3387	49.5829	273.558	-2.46322	0.0135941	0.238273	Cdkl1	12	69746848	69791267	-	2041	protein_coding	cyclin-dependent kinase-like 1 (CDC2-related kinase) [Source:MGI Symbol;Acc:MGI:1918341]	-	-
ENSMUSG00000007817	8046.82	7856.12	5915.26	6907.05	5037.89	5645.8	4576.12	3597.35	6106.55	4692.03	6752.63	4923.57	0.455715	0.0136274	0.238677	Zmiz1	14	25459185	25666743	+	12523	protein_coding	zinc finger, MIZ-type containing 1 [Source:MGI Symbol;Acc:MGI:3040693]	-	-
ENSMUSG00000032243	410.71	316.018	265.339	309.128	293.676	156.966	262.785	193.205	265.417	248.145	318.974	225.304	0.500106	0.0136396	0.238709	Itga11	9	62677826	62783982	+	5131	protein_coding	integrin alpha 11 [Source:MGI Symbol;Acc:MGI:2442114]	-	-
ENSMUSG00000053062	1664.21	1375.83	1787.55	1495.71	1849.96	4852.03	2033.94	1651.56	1969.98	2259.52	1634.65	2553.41	-0.6434	0.0136856	0.239333	Jam2	16	84774123	84825928	+	6045	protein_coding	junction adhesion molecule 2 [Source:MGI Symbol;Acc:MGI:1933820]	-	-
ENSMUSG00000027643	0	4.81734	0	0	0.966039	32.784	3.85033	21.5762	2.94907	0	1.15668	12.2319	-3.3685	0.0137127	0.239448	Ghrh	2	157329497	157347506	-	668	protein_coding	growth hormone releasing hormone [Source:MGI Symbol;Acc:MGI:95709]	-	-
ENSMUSG00000074577	0	20.2328	24.9379	20.1836	17.3887	14.9018	46.204	54.9213	66.8457	43.6875	16.5486	45.312	-1.44601	0.013713	0.239448	Ripor3	2	167980164	168010618	-	4244	protein_coding	RIPOR family member 3 [Source:MGI Symbol;Acc:MGI:1916803]	-	-
ENSMUSG00000053442	2.37404	0.963468	1.99503	8.49837	2.89812	0	0	0	0	0	3.34581	0	4.24506	0.0137265	0.239502	4930597O21Rik	6	66894652	66896521	-	1282	processed_transcript	RIKEN cDNA 4930597O21 gene [Source:MGI Symbol;Acc:MGI:1922623]	-	-
ENSMUSG00000034459	721.709	344.922	863.847	372.866	315.895	408.31	167.489	469.774	186.775	199.215	523.848	286.312	0.871572	0.0137498	0.239728	Ifit1	19	34640871	34650009	+	2656	protein_coding	interferon-induced protein with tetratricopeptide repeats 1 [Source:MGI Symbol;Acc:MGI:99450]	-	-
ENSMUSG00000021120	159.061	178.242	146.635	183.777	121.721	185.776	205.993	230.473	213.316	235.912	157.887	214.294	-0.441809	0.0138243	0.240735	Pigh	12	79080664	79089651	-	3638	protein_coding	phosphatidylinositol glycan anchor biosynthesis, class H [Source:MGI Symbol;Acc:MGI:99463]	-	-
ENSMUSG00000044921	64.0992	43.3561	53.8658	36.1181	20.2868	242.403	82.7821	80.4205	56.0324	32.3287	43.5452	98.7933	-1.18311	0.0138284	0.240735	Rassf9	10	102512222	102549736	+	7326	protein_coding	Ras association (RalGDS/AF-6) domain family (N-terminal) member 9 [Source:MGI Symbol;Acc:MGI:2384307]	-	-
ENSMUSG00000048351	370.351	369.972	404.991	366.492	428.921	301.016	285.887	274.607	347.008	324.161	388.145	306.536	0.340797	0.0138606	0.241113	Coa7	4	108328140	108341544	+	3851	protein_coding	cytochrome c oxidase assembly factor 7 [Source:MGI Symbol;Acc:MGI:1917143]	-	-
ENSMUSG00000026304	8.30916	4.81734	2.99254	8.49837	6.76227	32.784	12.5136	21.5762	8.84722	11.3587	6.27594	17.416	-1.47852	0.0139112	0.241762	Rab17	1	90958133	90969661	-	1992	protein_coding	RAB17, member RAS oncogene family [Source:MGI Symbol;Acc:MGI:104640]	-	-
ENSMUSG00000100546	0	3.85387	0	0	1.93208	5.96072	6.73808	5.88443	12.7793	6.11625	1.15719	7.49576	-2.64746	0.0139255	0.241762	Gm29483	1	92714234	92717202	-	1078	lincRNA	predicted gene 29483 [Source:MGI Symbol;Acc:MGI:5580189]	-	-
ENSMUSG00000086474	0	0	0	9.56067	5.79623	7.94763	18.2891	17.6533	14.7454	17.475	3.07138	15.2221	-2.30658	0.0139293	0.241762	9130204K15Rik	11	79781979	79872394	-	1462	lincRNA	RIKEN cDNA 9130204K15 gene [Source:MGI Symbol;Acc:MGI:2441733]	-	-
novel.972	0	0	0	0	0	29.8036	0	8.82664	0	0	0	7.72605	-5.34566	0.0139634	0.242172	-	8	83852258	83860761	+	1189	-	- && - && -	-	-
ENSMUSG00000005615	3584.81	3560.01	2774.09	1822.9	2625.69	2760.81	1329.33	2056.61	1861.85	1784.2	2873.5	1958.56	0.553038	0.0140197	0.242966	Pcyt1a	16	32430921	32475070	+	7412	protein_coding	phosphate cytidylyltransferase 1, choline, alpha isoform [Source:MGI Symbol;Acc:MGI:88557]	-	-
ENSMUSG00000030321	26.1145	15.4155	34.913	6.37378	18.3547	140.077	39.4659	57.8636	31.4568	10.485	20.2343	55.8696	-1.46455	0.0140306	0.242972	Efcab12	6	115810729	115838412	-	2663	protein_coding	EF-hand calcium binding domain 12 [Source:MGI Symbol;Acc:MGI:2681834]	-	-
novel.400	0	0	0	1.0623	0	6.95418	3.85033	2.94221	2.94907	1.7475	0.212459	3.68866	-3.7004	0.0140512	0.243044	-	17	16979766	16992527	+	252	-	- && - && -	-	-
ENSMUSG00000061100	8.30916	1.92694	7.98011	6.37378	3.86416	31.7905	8.66324	22.557	6.88117	15.7275	5.69083	17.1239	-1.59952	0.0140558	0.243044	Retnla	16	48842551	48844461	+	599	protein_coding	resistin like alpha [Source:MGI Symbol;Acc:MGI:1888504]	-	-
ENSMUSG00000035203	2598.39	2404.82	2389.05	2060.85	2453.74	2046.51	2001.21	2006.59	1936.56	1965.94	2381.37	1991.36	0.257987	0.0140713	0.243131	Epn1	7	5080235	5098178	+	2810	protein_coding	epsin 1 [Source:MGI Symbol;Acc:MGI:1333763]	-	-
ENSMUSG00000040183	84.2786	76.114	102.744	49.9279	42.5057	629.85	104.921	274.607	54.0663	69.0262	71.114	226.494	-1.67121	0.0140841	0.24317	Ankrd6	4	32804035	32950841	-	5477	protein_coding	ankyrin repeat domain 6 [Source:MGI Symbol;Acc:MGI:2154278]	-	-
ENSMUSG00000000202	0	7.70774	7.98011	4.24919	0.966039	183.789	0	40.2103	10.8133	6.99	4.18062	48.3605	-3.52662	0.014098	0.243228	Btbd17	11	114791217	114795945	-	3187	protein_coding	BTB (POZ) domain containing 17 [Source:MGI Symbol;Acc:MGI:1919264]	TRAF	TRAF
novel.45	0	3.85387	0	2.12459	1.93208	5.96072	7.70066	32.3644	5.89815	0.87375	1.58211	10.5595	-2.71417	0.0141351	0.243685	-	1	88979861	88981167	-	655	-	- && - && -	-	-
ENSMUSG00000001642	5032.97	3178.48	3403.52	2675.92	3647.76	1871.67	2385.28	2916.72	2666.95	3044.14	3587.73	2576.95	0.477243	0.0141848	0.244237	Akr1b3	6	34302434	34317478	-	8384	protein_coding	aldo-keto reductase family 1, member B3 (aldose reductase) [Source:MGI Symbol;Acc:MGI:1353494]	-	-
ENSMUSG00000076940	0	0	0	0	0	13.9084	5.77549	0	0	6.99	0	5.33477	-4.81286	0.0142021	0.244237	Iglv2	16	19260401	19260859	-	366	IG_V_gene	immunoglobulin lambda variable 2 [Source:MGI Symbol;Acc:MGI:99548]	-	-
ENSMUSG00000112105	13.0572	4.81734	7.98011	5.31148	3.86416	0	3.85033	0	0.983025	0	7.00607	0.966671	2.85818	0.0142031	0.244237	Rps7-ps2	12	3521922	3523268	-	1347	processed_pseudogene	ribosomal protein S7, pseudogene 2 [Source:MGI Symbol;Acc:MGI:3646014]	-	-
ENSMUSG00000091091	0	1.92694	0.997514	5.31148	0	16.8887	18.2891	2.94221	5.89815	4.36875	1.64719	9.67738	-2.552	0.0142214	0.244237	Kcnmb3	3	32471588	32492231	-	1715	protein_coding	potassium large conductance calcium-activated channel, subfamily M, beta member 3 [Source:MGI Symbol;Acc:MGI:3612244]	-	-
ENSMUSG00000021456	8.30916	3.85387	16.9577	3.18689	17.3887	69.5418	15.4013	81.4013	14.7454	2.62125	9.93927	36.7422	-1.88181	0.0142252	0.244237	Fbp2	13	62836877	62858422	-	1469	protein_coding	fructose bisphosphatase 2 [Source:MGI Symbol;Acc:MGI:95491]	-	-
ENSMUSG00000030800	13.0572	33.7214	91.7713	13.8099	22.2189	422.218	39.4659	199.09	43.2531	38.445	34.9157	148.494	-2.08685	0.0142306	0.244237	Prss8	7	127925716	127930104	-	1852	protein_coding	protease, serine 8 (prostasin) [Source:MGI Symbol;Acc:MGI:1923810]	-	-
ENSMUSG00000081058	48.6679	55.8811	22.9428	46.741	57.9623	32.784	20.2142	21.5762	28.5077	5.2425	46.4391	21.6649	1.10486	0.0142583	0.244531	Hist2h3c2	3	96238108	96239127	-	1020	protein_coding	histone cluster 2, H3c2 [Source:MGI Symbol;Acc:MGI:2448357]	-	-
ENSMUSG00000028715	0	0	0	2.12459	5.79623	4.96727	10.5884	20.5955	6.88117	6.11625	1.58417	9.82972	-2.60962	0.0142889	0.244873	Cyp4a14	4	115486200	115496142	-	2601	protein_coding	cytochrome P450, family 4, subfamily a, polypeptide 14 [Source:MGI Symbol;Acc:MGI:1096550]	-	-
ENSMUSG00000042348	344.236	535.688	605.491	583.201	598.944	385.46	397.547	398.18	376.498	424.642	533.512	396.465	0.429122	0.0143281	0.245354	Arl15	13	113794505	114157461	+	3515	protein_coding	ADP-ribosylation factor-like 15 [Source:MGI Symbol;Acc:MGI:2442308]	-	-
novel.658	8.30916	6.74428	0.997514	14.8721	20.2868	13.9084	62.5679	21.5762	21.6265	29.7075	10.242	29.8773	-1.54374	0.0143382	0.245354	-	3	9028392	9029992	+	711	-	- && - && -	-	-
ENSMUSG00000038860	213.664	279.406	230.426	258.138	124.619	114.247	160.751	143.188	168.097	155.527	221.251	148.362	0.576106	0.0144044	0.246305	Garnl3	2	32986224	33131654	-	12352	protein_coding	GTPase activating RANGAP domain-like 3 [Source:MGI Symbol;Acc:MGI:2139309]	-	-
ENSMUSG00000006056	4.74809	0	0.997514	0	0	55.6334	13.4762	5.88443	0	0	1.14912	14.9988	-3.75185	0.0144175	0.246346	Calcoco2	11	96099326	96111964	-	1621	protein_coding	calcium binding and coiled-coil domain 2 [Source:MGI Symbol;Acc:MGI:1343177]	-	-
ENSMUSG00000031881	0	0.963468	0	0	0	17.8822	1.92516	11.7689	0	0	0.192694	6.31524	-4.47687	0.0144456	0.246644	Cdh16	8	104601911	104624396	-	3792	protein_coding	cadherin 16 [Source:MGI Symbol;Acc:MGI:106671]	-	-
ENSMUSG00000041710	34.4236	13.4886	19.9503	9.56067	19.3208	6.95418	5.77549	6.86517	10.8133	8.7375	19.3488	7.82912	1.29845	0.0145735	0.248644	Trpc5	X	144381671	144688180	-	5014	protein_coding	transient receptor potential cation channel, subfamily C, member 5 [Source:MGI Symbol;Acc:MGI:109524]	-	-
ENSMUSG00000031786	0	2.8904	6.9826	0	0	419.237	68.3433	101.016	0	0	1.9746	117.719	-5.89281	0.0146345	0.2495	Drc7	8	95055103	95078141	+	2988	protein_coding	dynein regulatory complex subunit 7 [Source:MGI Symbol;Acc:MGI:2685616]	-	-
novel.821	85.4656	144.52	97.7564	78.6099	95.6379	208.625	92.4079	210.859	185.792	117.082	100.398	162.953	-0.696358	0.0147252	0.250633	-	5	15496752	15507162	-	5107	-	- && sp|P31789|ENV_IPMAE Envelope glycoprotein OS=Mouse intracisternal a-particle MIAE OX=11932 GN=env PE=2 SV=1 && -	-	-
ENSMUSG00000026578	270.641	273.625	246.386	259.2	184.513	1104.72	332.091	370.719	231.994	252.514	246.873	458.408	-0.892772	0.0147364	0.250633	Ccdc181	1	164275585	164287847	+	1909	protein_coding	coiled-coil domain containing 181 [Source:MGI Symbol;Acc:MGI:1922145]	-	-
ENSMUSG00000097056	14.2443	14.452	9.97514	6.37378	13.5245	70.5352	19.2516	19.6148	8.84722	34.95	11.714	30.6398	-1.38685	0.0147426	0.250633	Gm4262	16	11008898	11015186	+	1986	lincRNA	predicted gene 4262 [Source:MGI Symbol;Acc:MGI:3782439]	-	-
ENSMUSG00000005763	3.56107	3.85387	2.99254	7.43607	9.66039	27.8167	10.5884	17.6533	11.7963	10.485	5.50079	15.6679	-1.50214	0.014765	0.250633	Cd247	1	165788681	165877277	+	5329	protein_coding	CD247 antigen [Source:MGI Symbol;Acc:MGI:88334]	-	-
ENSMUSG00000019302	2562.78	1994.38	1814.48	1931.25	2259.57	1812.06	1390.93	1618.22	1711.45	1780.7	2112.49	1662.67	0.345222	0.014792	0.250633	Atp6v0a1	11	101009452	101063719	+	6556	protein_coding	ATPase, H+ transporting, lysosomal V0 subunit A1 [Source:MGI Symbol;Acc:MGI:103286]	-	-
ENSMUSG00000070471	0	0	0	2.12459	0.966039	15.8953	3.85033	15.6918	1.96605	0	0.618126	7.48069	-3.59394	0.0147942	0.250633	Erich6	3	58616300	58637207	-	2195	protein_coding	glutamate rich 6 [Source:MGI Symbol;Acc:MGI:3588212]	-	-
ENSMUSG00000007021	0	0	8.97763	9.56067	6.76227	31.7905	14.4387	12.7496	34.4059	7.86375	5.06011	20.2497	-1.99247	0.0147944	0.250633	Syngr3	17	24685092	24689955	-	2071	protein_coding	synaptogyrin 3 [Source:MGI Symbol;Acc:MGI:1341881]	-	-
ENSMUSG00000047508	0	1.92694	16.9577	9.56067	9.66039	17.8822	21.1768	23.5377	23.5926	29.7075	7.62115	23.1794	-1.59555	0.0147957	0.250633	Mbd3l2	9	18430654	18446316	+	2168	protein_coding	methyl-CpG binding domain protein 3-like 2 [Source:MGI Symbol;Acc:MGI:2158460]	-	-
ENSMUSG00000040495	73.5954	144.52	34.913	52.0525	92.7397	157.959	116.472	120.631	151.386	152.032	79.5642	139.696	-0.810314	0.0148006	0.250633	Chrm4	2	91927249	91928688	+	1440	protein_coding	cholinergic receptor, muscarinic 4 [Source:MGI Symbol;Acc:MGI:88399]	-	-
ENSMUSG00000024066	1995.38	894.098	690.28	666.06	454.038	678.529	430.274	624.73	501.343	488.426	939.972	544.66	0.786815	0.0148265	0.250633	Xdh	17	73883895	73950196	-	9175	protein_coding	xanthine dehydrogenase [Source:MGI Symbol;Acc:MGI:98973]	-	-
ENSMUSG00000038070	657.61	622.4	671.327	659.686	597.978	807.678	800.869	735.554	722.523	798.607	641.8	773.046	-0.26882	0.014835	0.250633	Cntln	4	84884309	85131921	+	7102	protein_coding	centlein, centrosomal protein [Source:MGI Symbol;Acc:MGI:2443104]	-	-
ENSMUSG00000021636	32.0496	45.283	67.831	74.3607	74.385	114.247	80.8569	125.534	89.4552	75.1425	58.7819	97.0473	-0.719385	0.0148413	0.250633	Marveld2	13	100595957	100616971	-	3382	protein_coding	MARVEL (membrane-associating) domain containing 2 [Source:MGI Symbol;Acc:MGI:2446166]	-	-
ENSMUSG00000051590	18.9924	4.81734	3.99006	4.24919	0	301.016	39.4659	32.3644	0	9.61124	6.40979	76.4916	-3.58332	0.0148421	0.250633	Map3k19	1	127815253	127855031	-	4883	protein_coding	mitogen-activated protein kinase kinase kinase 19 [Source:MGI Symbol;Acc:MGI:1203481]	-	-
ENSMUSG00000043439	84.2786	51.0638	59.8509	49.9279	40.5736	48.6792	25.0271	17.6533	33.4228	33.2025	57.139	31.597	0.851631	0.0148707	0.250807	Epop	11	97627389	97629702	-	2314	protein_coding	elongin BC and polycomb repressive complex 2 associated protein [Source:MGI Symbol;Acc:MGI:2143991]	-	-
ENSMUSG00000030223	13.0572	26.9771	17.9553	37.1804	26.0831	44.7054	42.3536	62.7672	45.2191	31.455	24.2506	45.3001	-0.896176	0.0148742	0.250807	Ptpro	6	137252319	137463233	+	6723	protein_coding	protein tyrosine phosphatase, receptor type, O [Source:MGI Symbol;Acc:MGI:1097152]	-	-
ENSMUSG00000009628	775.125	478.844	546.638	935.883	908.077	1075.91	1332.21	873.838	861.13	1119.27	728.913	1052.47	-0.530259	0.0148906	0.2509	Tex15	8	33516738	33585582	+	9622	protein_coding	testis expressed gene 15 [Source:MGI Symbol;Acc:MGI:1934816]	-	-
ENSMUSG00000027379	333.553	315.054	296.262	415.358	372.891	363.604	501.505	392.295	495.444	631.721	346.624	476.914	-0.461033	0.0149083	0.251015	Bub1	2	127801122	127831865	-	4354	protein_coding	BUB1, mitotic checkpoint serine/threonine kinase [Source:MGI Symbol;Acc:MGI:1100510]	-	-
ENSMUSG00000072763	178.053	105.981	182.545	199.712	115.925	181.802	230.057	258.915	269.349	208.826	156.443	229.79	-0.556346	0.0149254	0.251122	5430403G16Rik	5	109674545	109691041	-	3341	protein_coding	RIKEN cDNA 5430403G16 gene [Source:MGI Symbol;Acc:MGI:1924450]	C2H2	C2H2
ENSMUSG00000038696	1397.13	1296.83	1350.63	1234.39	1137.99	1140.48	1039.59	992.507	952.551	1127.14	1283.39	1050.45	0.288608	0.0149539	0.251417	Mapkap1	2	34406771	34624950	+	4059	protein_coding	mitogen-activated protein kinase associated protein 1 [Source:MGI Symbol;Acc:MGI:2444554]	-	-
ENSMUSG00000034926	5720.26	3594.7	3107.26	2495.33	2423.79	3592.33	1729.76	1825.15	1675.07	2179.13	3468.27	2200.29	0.656433	0.0149764	0.2515	Dhcr24	4	106561038	106589113	+	4028	protein_coding	24-dehydrocholesterol reductase [Source:MGI Symbol;Acc:MGI:1922004]	-	-
novel.891	36.7977	2.8904	0	3.18689	0	0	1.92516	0	0	0	8.575	0.385033	4.44404	0.0149806	0.2515	-	6	93627032	93636404	-	488	-	- && - && -	-	-
ENSMUSG00000058174	0	3.85387	8.97763	0	0	31.7905	11.551	27.4607	7.8642	1.7475	2.5663	16.0828	-2.62966	0.0150109	0.25182	Gm5148	3	37714190	37724490	-	3901	protein_coding	predicted gene 5148 [Source:MGI Symbol;Acc:MGI:3646006]	-	-
ENSMUSG00000097815	1587.05	1526.13	2656.38	3141.21	1636.47	2112.08	1383.23	1247.5	993.838	1093.93	2109.45	1366.12	0.626855	0.0150215	0.25182	Gm26809	6	18844220	18847360	+	2981	lincRNA	predicted gene, 26809 [Source:MGI Symbol;Acc:MGI:5477303]	-	-
ENSMUSG00000038086	22.5534	21.1963	2.99254	13.8099	33.8114	3.97382	8.66324	5.88443	5.89815	7.86375	18.8727	6.45668	1.54488	0.0150951	0.252817	Hspb2	9	50751078	50752354	-	834	protein_coding	heat shock protein 2 [Source:MGI Symbol;Acc:MGI:1916503]	-	-
novel.748	3.56107	5.78081	22.9428	21.2459	3.86416	20.8625	33.6904	17.6533	53.0833	31.455	11.479	31.3489	-1.44765	0.0151029	0.252817	-	4	6161590	6174025	-	1759	-	- && sp|P11369|LORF2_MOUSE LINE-1 retrotransposable element ORF2 protein OS=Mus musculus OX=10090 GN=Pol PE=1 SV=2 && -	-	-
novel.463	4.74809	2.8904	5.98509	0	8.69435	17.8822	13.4762	2.94221	21.6265	25.3387	4.46359	16.2532	-1.8602	0.0151263	0.253026	-	17	79439069	79442969	-	800	-	- && sp|P11369|LORF2_MOUSE LINE-1 retrotransposable element ORF2 protein OS=Mus musculus OX=10090 GN=Pol PE=1 SV=2 && -	-	-
ENSMUSG00000021061	1152.6	593.496	498.757	346.309	620.197	657.666	332.091	278.53	291.958	332.025	642.272	378.454	0.762747	0.015199	0.254058	Sptb	12	76580488	76710547	-	12147	protein_coding	spectrin beta, erythrocytic [Source:MGI Symbol;Acc:MGI:98387]	-	-
ENSMUSG00000030307	8.30916	1.92694	2.99254	25.4951	4.83019	37.7512	46.204	11.7689	16.7114	23.5912	8.71079	27.2053	-1.65172	0.0152174	0.254182	Slc6a11	6	114131241	114249952	+	5050	protein_coding	solute carrier family 6 (neurotransmitter transporter, GABA), member 11 [Source:MGI Symbol;Acc:MGI:95630]	-	-
ENSMUSG00000005360	80.7175	102.128	185.538	58.4263	74.385	1291.49	95.2957	474.677	74.7099	83.88	100.239	404.011	-2.01065	0.0152531	0.254593	Slc1a3	15	8634124	8710764	-	8537	protein_coding	solute carrier family 1 (glial high affinity glutamate transporter), member 3 [Source:MGI Symbol;Acc:MGI:99917]	-	-
ENSMUSG00000042029	384.595	370.935	390.028	499.279	373.857	490.766	515.944	443.294	544.596	635.216	403.739	525.963	-0.382236	0.0152945	0.2551	Ncapg2	12	116405402	116463731	+	9939	protein_coding	non-SMC condensin II complex, subunit G2 [Source:MGI Symbol;Acc:MGI:1923294]	-	-
ENSMUSG00000064156	0	0.963468	0.997514	1.0623	5.79623	4.96727	9.62582	15.6918	3.9321	10.485	1.7639	8.9404	-2.31085	0.0153256	0.255434	Prol1	5	88317312	88328814	+	1163	protein_coding	proline rich, lacrimal 1 [Source:MGI Symbol;Acc:MGI:107496]	-	-
ENSMUSG00000004341	0	0	0	3.18689	0	0	6.73808	5.88443	14.7454	10.485	0.637378	7.57057	-3.59146	0.0153541	0.255724	Gpx6	13	21312125	21319624	+	1368	protein_coding	glutathione peroxidase 6 [Source:MGI Symbol;Acc:MGI:1922762]	-	-
ENSMUSG00000021751	2.37404	5.78081	15.9602	0	0.966039	372.545	44.2788	179.475	0	0	5.01622	119.26	-4.56938	0.0153741	0.255874	Acox2	14	8225511	8259353	-	3703	protein_coding	acyl-Coenzyme A oxidase 2, branched chain [Source:MGI Symbol;Acc:MGI:1934852]	-	-
ENSMUSG00000009114	5.93511	1.92694	18.9528	0	4.83019	568.256	77.9692	102.978	0	0	6.329	149.84	-4.56475	0.0153979	0.256085	2610028H24Rik	10	76449081	76461110	+	1705	protein_coding	RIKEN cDNA 2610028H24 gene [Source:MGI Symbol;Acc:MGI:1924214]	-	-
ENSMUSG00000052477	11.8702	0.963468	0	0	1.93208	0	22.1394	17.6533	20.6435	33.2025	2.95315	18.7277	-2.69845	0.0154181	0.256136	C130026I21Rik	1	84992690	85270566	-	3827	protein_coding	RIKEN cDNA C130026I21 gene [Source:MGI Symbol;Acc:MGI:3612702]	-	-
ENSMUSG00000025175	9.49618	10.5981	6.9826	16.9967	16.4227	19.8691	34.653	37.2681	16.7114	22.7175	12.0993	26.2438	-1.11509	0.0154232	0.256136	Fn3k	11	121434913	121450491	+	4399	protein_coding	fructosamine 3 kinase [Source:MGI Symbol;Acc:MGI:1926834]	-	-
ENSMUSG00000007888	1.18702	0.963468	10.9727	3.18689	2.89812	42.7185	5.77549	28.4414	1.96605	8.7375	3.84163	17.5278	-2.1811	0.0154721	0.256581	Crlf1	8	70493158	70504081	+	1644	protein_coding	cytokine receptor-like factor 1 [Source:MGI Symbol;Acc:MGI:1340030]	-	-
ENSMUSG00000041144	344.236	211.963	191.523	171.03	241.51	577.197	302.251	284.414	328.33	294.454	232.052	357.329	-0.623672	0.015475	0.256581	Dnah7b	1	46066315	46373546	+	19980	protein_coding	dynein, axonemal, heavy chain 7B [Source:MGI Symbol;Acc:MGI:2684953]	-	-
ENSMUSG00000025916	1.18702	3.85387	0	0	0	23.8429	7.70066	12.7496	3.9321	0	1.00818	9.64505	-3.24495	0.0154882	0.256581	Ppp1r42	1	9968624	10009136	-	1523	protein_coding	protein phosphatase 1, regulatory subunit 42 [Source:MGI Symbol;Acc:MGI:1921138]	-	-
ENSMUSG00000050174	59.3511	74.187	73.8161	23.3705	46.3699	17.8822	33.6904	18.634	33.4228	39.3187	55.4189	28.5896	0.953275	0.0154982	0.256581	Nudt6	3	37404910	37420211	-	1677	protein_coding	nudix (nucleoside diphosphate linked moiety X)-type motif 6 [Source:MGI Symbol;Acc:MGI:2387618]	-	-
ENSMUSG00000064202	36.7977	18.3059	36.908	18.059	28.9812	129.149	36.5781	50.0176	37.3549	38.445	27.8104	58.3089	-1.06885	0.0155159	0.256581	4430402I18Rik	19	28893042	28967800	-	5420	protein_coding	RIKEN cDNA 4430402I18 gene [Source:MGI Symbol;Acc:MGI:1918036]	-	-
ENSMUSG00000010492	17.8053	3.85387	13.9652	7.43607	15.4566	188.756	23.102	44.1332	1.96605	1.7475	11.7034	51.941	-2.15125	0.0155167	0.256581	Uckl1os	2	181578480	181585170	+	2522	antisense	uridine-cytidine kinase 1-like 1, opposite strand [Source:MGI Symbol;Acc:MGI:3801877]	-	-
ENSMUSG00000063130	3.56107	0	2.99254	1.0623	1.93208	35.7643	0.962582	9.80738	8.84722	1.7475	1.9096	11.4258	-2.59361	0.0155506	0.25686	Calml3	13	3802896	3804316	-	1421	protein_coding	calmodulin-like 3 [Source:MGI Symbol;Acc:MGI:1917655]	-	-
ENSMUSG00000022809	0	0	9.97514	0	0	120.208	22.1394	6.86517	8.84722	8.7375	1.99503	33.3594	-4.05595	0.0155623	0.25686	Nr1i2	16	38248323	38294824	-	2553	protein_coding	nuclear receptor subfamily 1, group I, member 2 [Source:MGI Symbol;Acc:MGI:1337040]	-	-
ENSMUSG00000018648	0	21.1963	49.8757	23.3705	30.9132	275.187	75.0814	123.573	53.0833	31.455	25.0712	111.676	-2.15263	0.0155669	0.25686	Dusp14	11	84048041	84069261	-	1945	protein_coding	dual specificity phosphatase 14 [Source:MGI Symbol;Acc:MGI:1927168]	-	-
novel.1021	0	0	0.997514	1.0623	0.966039	2.98036	8.66324	0.980738	23.5926	0	0.60517	7.24339	-3.56321	0.0156033	0.257276	-	9	42264455	42273622	+	539	-	- && - && -	-	-
ENSMUSG00000031659	581.641	438.378	279.304	403.673	403.804	536.465	600.651	611	568.188	564.442	421.36	576.149	-0.452494	0.0156471	0.257644	Adcy7	8	88272403	88329962	+	6733	protein_coding	adenylate cyclase 7 [Source:MGI Symbol;Acc:MGI:102891]	-	-
ENSMUSG00000041134	144.817	321.798	298.257	275.135	386.416	251.344	222.357	147.111	149.42	97.8599	285.284	173.618	0.71828	0.0156497	0.257644	Cyyr1	16	85421533	85553397	-	8894	protein_coding	cysteine and tyrosine-rich protein 1 [Source:MGI Symbol;Acc:MGI:2152187]	-	-
ENSMUSG00000000732	386.969	456.684	401.001	489.719	546.778	519.576	653.593	680.632	487.58	673.661	456.23	603.009	-0.402087	0.0156604	0.257644	Icosl	10	78069302	78083913	+	4620	protein_coding	icos ligand [Source:MGI Symbol;Acc:MGI:1354701]	-	-
ENSMUSG00000047988	1.18702	0	0	1.0623	0	6.95418	1.92516	0.980738	3.9321	9.61124	0.449864	4.68068	-3.47354	0.0156702	0.257644	4933428G20Rik	11	97490783	97500340	-	1425	protein_coding	RIKEN cDNA 4933428G20 gene [Source:MGI Symbol;Acc:MGI:1918475]	-	-
ENSMUSG00000019775	65.2862	40.4657	62.8434	38.2427	42.5057	68.5483	53.9046	107.881	73.7268	108.345	49.8687	82.4812	-0.729646	0.0157305	0.258451	Rgs17	10	5825663	5922400	-	8298	protein_coding	regulator of G-protein signaling 17 [Source:MGI Symbol;Acc:MGI:1927469]	-	-
ENSMUSG00000014543	0	0	0	0	0	15.8953	0.962582	11.7689	0	0	0	5.72534	-4.91277	0.0157437	0.258483	Klra17	6	129831154	129876672	-	1192	protein_coding	killer cell lectin-like receptor, subfamily A, member 17 [Source:MGI Symbol;Acc:MGI:2180674]	-	-
ENSMUSG00000022620	579.267	428.743	422.946	454.663	409.601	408.31	362.894	273.626	344.059	347.752	459.044	347.328	0.401327	0.0157787	0.258726	Arsa	15	89472476	89477425	-	3680	protein_coding	arylsulfatase A [Source:MGI Symbol;Acc:MGI:88077]	-	-
ENSMUSG00000099034	104.458	111.762	139.652	139.161	240.544	147.031	258.935	275.587	224.13	242.902	147.115	229.717	-0.641521	0.0157809	0.258726	2810039B14Rik	15	75642129	75653643	+	6418	transcribed_unitary_pseudogene	RIKEN cDNA 2810039B14 gene [Source:MGI Symbol;Acc:MGI:1919915]	C2H2	C2H2
ENSMUSG00000066952	18.9924	2.8904	5.98509	4.24919	4.83019	77.4894	12.5136	19.6148	7.8642	10.485	7.38944	25.5934	-1.80668	0.0158019	0.258887	Myo1h	5	114289166	114365357	+	5927	protein_coding	myosin 1H [Source:MGI Symbol;Acc:MGI:1914674]	-	-
ENSMUSG00000100553	0	0.963468	0	12.7476	10.6264	16.8887	18.2891	14.7111	34.4059	18.3487	4.86749	20.5287	-2.07068	0.0158536	0.25955	Gm17751	1	76489133	76502028	+	2188	lincRNA	predicted gene, 17751 [Source:MGI Symbol;Acc:MGI:5009832]	-	-
ENSMUSG00000037509	55.79	55.8811	95.7614	66.9247	60.8605	295.056	80.8569	132.4	73.7268	69.9	67.0435	130.388	-0.958273	0.0158732	0.259686	Arhgef4	1	34678188	34813309	+	9861	protein_coding	Rho guanine nucleotide exchange factor (GEF) 4 [Source:MGI Symbol;Acc:MGI:2442507]	-	-
ENSMUSG00000026235	138.882	71.2966	182.545	116.853	69.5548	443.08	133.799	195.167	140.573	162.517	115.826	215.027	-0.893135	0.0158911	0.259744	Epha4	1	77367185	77515088	-	8054	protein_coding	Eph receptor A4 [Source:MGI Symbol;Acc:MGI:98277]	-	-
ENSMUSG00000031755	337.114	394.058	318.207	359.056	481.087	433.146	477.441	540.387	564.256	467.456	377.905	496.537	-0.39298	0.0158993	0.259744	Bbs2	8	94067954	94098928	-	3311	protein_coding	Bardet-Biedl syndrome 2 (human) [Source:MGI Symbol;Acc:MGI:2135267]	-	-
ENSMUSG00000067919	0	0	0	0	0	1.98691	0.962582	0.980738	20.6435	0	0	4.91475	-4.69235	0.015915	0.259783	Rex2	4	147021850	147060794	+	4349	protein_coding	reduced expression 2 [Source:MGI Symbol;Acc:MGI:1328322]	C2H2	C2H2
ENSMUSG00000093954	2.37404	7.70774	5.98509	6.37378	11.5925	32.784	14.4387	17.6533	24.5756	6.11625	6.80662	19.1136	-1.47361	0.0159242	0.259783	Gm16867	14	69363504	69503362	-	7788	protein_coding	predicted gene, 16867 [Source:MGI Symbol;Acc:MGI:4439791]	-	-
ENSMUSG00000002308	379.847	461.501	476.812	538.584	562.235	651.706	598.726	646.306	549.511	651.817	483.796	619.613	-0.356231	0.0159522	0.260057	Cd320	17	33843091	33849774	+	2592	protein_coding	CD320 antigen [Source:MGI Symbol;Acc:MGI:1860083]	-	-
ENSMUSG00000043648	7.12213	10.5981	4.98757	19.1213	10.6264	36.7578	17.3265	16.6725	22.6096	27.0862	10.4911	24.0905	-1.19886	0.0159795	0.260182	Pld6	11	59783897	59787645	-	1757	protein_coding	phospholipase D family, member 6 [Source:MGI Symbol;Acc:MGI:2687283]	-	-
ENSMUSG00000037716	30.8626	35.6483	55.8608	69.0493	10.6264	584.151	102.034	105.92	52.1003	16.6012	40.4095	172.161	-2.09097	0.0159824	0.260182	Ccdc33	9	58028677	58118823	-	5342	protein_coding	coiled-coil domain containing 33 [Source:MGI Symbol;Acc:MGI:1922464]	-	-
ENSMUSG00000102336	67.6603	52.0273	44.8881	48.8656	62.7925	51.6596	31.7652	16.6725	32.4398	21.8437	55.2468	30.8762	0.84064	0.0160055	0.260294	Gm37233	1	34427002	34433264	-	6263	lincRNA	predicted gene, 37233 [Source:MGI Symbol;Acc:MGI:5610461]	-	-
ENSMUSG00000032376	4719.6	3596.63	3954.15	3646.86	3685.44	3426.42	2910.85	2598.96	3469.09	3205.79	3920.53	3122.22	0.328349	0.0160119	0.260294	Usp3	9	66514637	66593142	-	6848	protein_coding	ubiquitin specific peptidase 3 [Source:MGI Symbol;Acc:MGI:2152450]	-	-
novel.711	27.3015	7.70774	20.9478	23.3705	27.0491	22.8494	37.5407	55.9021	94.3704	26.2125	21.2753	47.375	-1.15723	0.0160362	0.26036	-	4	11182832	11186944	+	4113	-	- && sp|P0DOG8|GGAG_MLVAV Glyco-Gag protein OS=AKV murine leukemia virus OX=11791 PE=1 SV=1 && PF01140:Matrix protein (MA), p15	-	-
ENSMUSG00000056234	1959.77	1690.89	1914.23	1854.77	1420.08	1632.24	1306.22	1264.17	1278.91	1497.61	1767.95	1395.83	0.340696	0.0160385	0.26036	Ncoa4	14	32159865	32179855	+	9365	protein_coding	nuclear receptor coactivator 4 [Source:MGI Symbol;Acc:MGI:1350932]	-	-
ENSMUSG00000042978	2525.98	2255.48	2629.45	2452.84	2472.09	2291.9	1601.74	1554.47	2046.66	2174.76	2467.17	1933.9	0.351262	0.0161095	0.26133	Sbk1	7	126272619	126295016	+	4227	protein_coding	SH3-binding kinase 1 [Source:MGI Symbol;Acc:MGI:2135937]	-	-
ENSMUSG00000038600	0	2.8904	9.97514	0	5.79623	77.4894	13.4762	34.3258	0	2.62125	3.73236	25.5825	-2.76432	0.0161319	0.261358	Atp6v0a4	6	38048483	38124586	-	4973	protein_coding	ATPase, H+ transporting, lysosomal V0 subunit A4 [Source:MGI Symbol;Acc:MGI:2153480]	-	-
ENSMUSG00000013766	4.74809	5.78081	2.99254	5.31148	20.2868	19.8691	25.0271	54.9213	3.9321	22.7175	7.82395	25.2934	-1.68485	0.0161339	0.261358	Ly6g6e	17	35076902	35078804	+	1273	protein_coding	lymphocyte antigen 6 complex, locus G6E [Source:MGI Symbol;Acc:MGI:1917524]	-	-
ENSMUSG00000033735	833.29	911.441	1018.46	829.653	998.884	694.424	748.889	691.42	748.082	836.178	918.346	743.799	0.304268	0.0161743	0.261829	Spr	6	85130176	85137766	-	3545	protein_coding	sepiapterin reductase [Source:MGI Symbol;Acc:MGI:103078]	-	-
ENSMUSG00000054555	428.515	528.944	462.847	574.702	401.872	380.493	359.043	435.448	329.313	331.151	479.376	367.09	0.385415	0.0162067	0.261993	Adam12	7	133883199	134232146	-	10573	protein_coding	a disintegrin and metallopeptidase domain 12 (meltrin alpha) [Source:MGI Symbol;Acc:MGI:105378]	-	-
ENSMUSG00000039481	60.5381	35.6483	90.7738	42.4919	41.5397	549.38	76.044	361.892	20.6435	47.1825	54.1984	211.028	-1.9611	0.0162102	0.261993	Nrtn	17	56751325	56757530	-	1023	protein_coding	neurturin [Source:MGI Symbol;Acc:MGI:108417]	-	-
ENSMUSG00000055976	0	0	7.98011	2.12459	4.83019	52.6531	12.5136	14.7111	1.96605	3.495	2.98698	17.0677	-2.50039	0.0162185	0.261993	Cldn23	8	35824712	35826559	-	1848	protein_coding	claudin 23 [Source:MGI Symbol;Acc:MGI:1919158]	-	-
novel.680	24.9275	9.63468	12.9677	5.31148	3.86416	29.8036	22.1394	36.2873	20.6435	25.3387	11.3411	26.8425	-1.25799	0.0162358	0.262089	-	3	109275494	109277321	+	1828	-	- && sp|Q8VC26|TLCD2_MOUSE TLC domain-containing protein 2 OS=Mus musculus OX=10090 GN=Tlcd2 PE=2 SV=1 && -	-	-
ENSMUSG00000037913	0	2.8904	4.98757	2.12459	4.83019	3.97382	9.62582	26.4799	6.88117	12.2325	2.96655	11.8386	-1.9748	0.0163068	0.262836	Tmem156	5	65054346	65092132	-	3309	protein_coding	transmembrane protein 156 [Source:MGI Symbol;Acc:MGI:2685292]	-	-
ENSMUSG00000071679	128.198	74.187	114.714	58.4263	137.178	21.856	72.1937	90.2279	39.321	48.93	102.541	54.5057	0.911325	0.0163341	0.262836	Rtl4	X	144688907	145122411	+	3635	protein_coding	retrotransposon Gag like 4 [Source:MGI Symbol;Acc:MGI:3588192]	-	-
ENSMUSG00000071076	1588.24	1064.63	1286.79	1148.34	1593	1068.96	844.185	1264.17	820.825	964.619	1336.2	992.551	0.428815	0.0163374	0.262836	Jund	8	70698949	70700616	+	1668	protein_coding	jun D proto-oncogene [Source:MGI Symbol;Acc:MGI:96648]	bZIP	bZIP
ENSMUSG00000096284	0	0	0	2.12459	10.6264	5.96072	22.1394	19.6148	18.6775	6.11625	2.5502	14.5017	-2.48677	0.0163443	0.262836	Tcstv1	13	119893388	119894785	-	1398	protein_coding	2-cell-stage, variable group, member 1 [Source:MGI Symbol;Acc:MGI:1933437]	-	-
novel.1020	41.5458	71.2966	69.826	103.043	80.1812	110.273	102.034	166.725	129.759	82.1325	73.1785	118.185	-0.68849	0.0163492	0.262836	-	9	37267472	37269271	+	1800	-	- && - && -	-	-
ENSMUSG00000114638	18.9924	9.63468	8.97763	26.5574	21.2529	24.8363	33.6904	31.3836	35.3889	44.5612	17.083	33.9721	-0.998268	0.0163504	0.262836	Gm31834	13	38527403	38532920	+	3470	antisense	predicted gene, 31834 [Source:MGI Symbol;Acc:MGI:5590993]	-	-
ENSMUSG00000021182	109.206	185.949	156.61	179.528	170.989	621.902	219.469	241.262	150.403	190.477	160.456	284.703	-0.826139	0.0164114	0.263633	Ccdc88c	12	100911523	101029056	-	11386	protein_coding	coiled-coil domain containing 88C [Source:MGI Symbol;Acc:MGI:1915589]	-	-
novel.62	0	0	0	0	0	8.94108	13.4762	0	0	3.495	0	5.18245	-4.77064	0.016429	0.263733	-	1	191427821	191432130	-	431	-	- && - && -	-	-
ENSMUSG00000025815	143.63	143.557	183.543	182.715	145.872	183.789	245.458	223.608	235.926	187.856	159.863	215.328	-0.429202	0.0164816	0.264298	Dhtkd1	2	5896115	5942792	-	6333	protein_coding	dehydrogenase E1 and transketolase domain containing 1 [Source:MGI Symbol;Acc:MGI:2445096]	-	-
ENSMUSG00000057228	0	0	0	0	1.93208	4.96727	2.88775	0	10.8133	10.485	0.386416	5.83066	-3.78852	0.0164872	0.264298	Aadat	8	60505932	60545677	+	2178	protein_coding	aminoadipate aminotransferase [Source:MGI Symbol;Acc:MGI:1345167]	-	-
ENSMUSG00000032680	13.0572	19.2694	61.8459	35.0558	25.117	216.573	66.4182	62.7672	32.4398	21.8437	30.8691	80.0084	-1.37117	0.0165518	0.265009	6820408C15Rik	2	152415587	152444330	+	1787	protein_coding	RIKEN cDNA 6820408C15 gene [Source:MGI Symbol;Acc:MGI:3045333]	-	-
ENSMUSG00000023940	131.759	142.593	112.719	162.531	174.853	141.07	212.731	203.013	207.418	288.337	144.891	210.514	-0.539476	0.0165582	0.265009	Sgo1	17	53674786	53689333	-	3810	protein_coding	shugoshin 1 [Source:MGI Symbol;Acc:MGI:1919665]	-	-
ENSMUSG00000039159	6490.64	4508.07	4894.8	4772.9	4532.65	4738.77	3985.09	3209.96	3651.94	3895.18	5039.81	3896.19	0.371198	0.0165659	0.265009	Ube2h	6	30211289	30304539	-	4780	protein_coding	ubiquitin-conjugating enzyme E2H [Source:MGI Symbol;Acc:MGI:104632]	-	-
ENSMUSG00000028955	1779.35	1776.64	1777.57	1895.14	1361.15	1342.16	1446.76	1447.57	1332.98	1409.36	1717.97	1395.77	0.299452	0.0166251	0.265771	Vamp3	4	151047300	151057963	-	2889	protein_coding	vesicle-associated membrane protein 3 [Source:MGI Symbol;Acc:MGI:1321389]	-	-
ENSMUSG00000085172	143.63	100.201	75.8111	108.354	107.23	70.5352	57.7549	72.5746	90.4383	65.5312	107.045	71.3669	0.583001	0.016708	0.266911	Gm6542	18	36609958	36610729	+	772	processed_pseudogene	predicted gene 6542 [Source:MGI Symbol;Acc:MGI:3644649]	-	-
ENSMUSG00000022132	56.9771	27.9406	90.7738	43.5541	41.5397	197.697	45.2414	229.493	41.287	71.6475	52.1571	117.073	-1.1665	0.0167343	0.267034	Cldn10	14	118787908	118875489	+	2591	protein_coding	claudin 10 [Source:MGI Symbol;Acc:MGI:1913101]	-	-
ENSMUSG00000029644	0	0.963468	0.997514	0	0	2.98036	4.81291	5.88443	12.7793	0	0.392196	5.2914	-3.64358	0.0167388	0.267034	Pdx1	5	147269959	147275848	+	2158	protein_coding	pancreatic and duodenal homeobox 1 [Source:MGI Symbol;Acc:MGI:102851]	HB-other	HB->HB-other
ENSMUSG00000055567	0	3.85387	2.99254	4.24919	0	7.94763	8.66324	7.84591	6.88117	16.6012	2.21912	9.58784	-2.10113	0.0167827	0.267481	Unc80	1	66468367	66699148	+	14425	protein_coding	unc-80, NALCN activator [Source:MGI Symbol;Acc:MGI:2652882]	-	-
ENSMUSG00000086462	0	0	0.997514	0	3.86416	3.97382	5.77549	14.7111	8.84722	2.62125	0.972334	7.18577	-2.84279	0.0168076	0.267481	Gm13990	2	116848099	116877168	-	2701	antisense	predicted gene 13990 [Source:MGI Symbol;Acc:MGI:3651766]	-	-
ENSMUSG00000086773	7.12213	0.963468	5.98509	2.12459	1.93208	0	0.962582	0	0	0	3.62547	0.192516	3.77893	0.0168131	0.267481	Gm16192	8	41039756	41042053	+	937	antisense	predicted gene 16192 [Source:MGI Symbol;Acc:MGI:3802024]	-	-
ENSMUSG00000067106	48.6679	35.6483	33.9155	32.9312	34.7774	11.9214	23.102	14.7111	23.5926	27.96	37.1881	20.2574	0.869503	0.0168131	0.267481	Gm5529	1	79922536	79923426	-	891	processed_pseudogene	predicted pseudogene 5529 [Source:MGI Symbol;Acc:MGI:3646377]	-	-
ENSMUSG00000037594	90.2137	77.0774	120.699	93.4821	126.551	213.593	111.66	182.417	121.895	141.547	101.605	154.222	-0.600649	0.0168487	0.267862	Clba1	12	112808937	112816252	+	1960	protein_coding	clathrin binding box of aftiphilin containing 1 [Source:MGI Symbol;Acc:MGI:2443738]	-	-
ENSMUSG00000003051	3.56107	25.0502	131.672	30.8066	28.9812	587.131	46.204	421.717	41.287	60.2887	44.0142	231.326	-2.39287	0.0169137	0.268618	Elf3	1	135253575	135258568	-	2217	protein_coding	E74-like factor 3 [Source:MGI Symbol;Acc:MGI:1101781]	-	-
ENSMUSG00000102959	0	0.963468	0.997514	0	0.966039	14.9018	5.77549	2.94221	6.88117	0	0.585404	6.10014	-3.33393	0.0169195	0.268618	Gm37015	18	80302160	80303680	-	1521	TEC	predicted gene, 37015 [Source:MGI Symbol;Acc:MGI:5610243]	-	-
ENSMUSG00000021414	7.12213	12.5251	7.98011	14.8721	12.5585	16.8887	17.3265	27.4607	16.7114	46.3087	11.0116	24.9392	-1.1792	0.0169337	0.268659	Fam217a	13	34909960	34924310	-	2875	protein_coding	family with sequence similarity 217, member A [Source:MGI Symbol;Acc:MGI:1919114]	-	-
ENSMUSG00000027315	54.603	37.5753	133.667	43.5541	40.5736	609.981	89.5202	256.953	56.0324	53.2987	61.9946	213.157	-1.78135	0.0169948	0.269442	Spint1	2	119237362	119249527	+	2767	protein_coding	serine protease inhibitor, Kunitz type 1 [Source:MGI Symbol;Acc:MGI:1338033]	-	-
ENSMUSG00000043015	220.786	240.867	207.483	230.518	287.88	255.318	355.193	360.912	414.836	252.514	237.507	327.754	-0.463645	0.0170664	0.270059	Nemp2	1	52630703	52651919	+	7078	protein_coding	nuclear envelope integral membrane protein 2 [Source:MGI Symbol;Acc:MGI:2444113]	-	-
ENSMUSG00000045064	46.2939	41.4291	70.8235	47.8033	55.0642	252.337	68.3433	107.881	41.287	63.7837	52.2828	106.727	-1.02817	0.0170678	0.270059	Zc2hc1c	12	85288591	85299358	+	4482	protein_coding	zinc finger, C2HC-type containing 1C [Source:MGI Symbol;Acc:MGI:1919600]	-	-
ENSMUSG00000030279	479.557	352.629	365.09	433.417	326.521	708.333	462.04	468.793	532.799	470.077	391.443	528.408	-0.433661	0.0170688	0.270059	C2cd5	6	143010920	143100141	-	12621	protein_coding	C2 calcium-dependent domain containing 5 [Source:MGI Symbol;Acc:MGI:1921991]	-	-
ENSMUSG00000022122	1158.53	700.441	605.491	684.119	628.891	519.576	534.233	530.579	510.19	633.468	755.495	545.609	0.468506	0.0171057	0.270457	Ednrb	14	103814625	103844402	-	4266	protein_coding	endothelin receptor type B [Source:MGI Symbol;Acc:MGI:102720]	-	-
ENSMUSG00000046605	157.874	201.365	179.553	205.023	280.151	207.632	305.139	305.01	357.821	276.979	204.793	290.516	-0.503032	0.0171243	0.270566	B3gntl1	11	121616197	121673153	-	3518	protein_coding	UDP-GlcNAc:betaGal beta-1,3-N-acetylglucosaminyltransferase-like 1 [Source:MGI Symbol;Acc:MGI:2441705]	-	-
ENSMUSG00000030246	2644.69	2413.49	2617.48	3014.8	3676.74	2693.25	4014.93	4531.99	3602.78	4463.11	2873.44	3861.21	-0.426279	0.0171949	0.271368	Ldhb	6	142490249	142507957	-	1570	protein_coding	lactate dehydrogenase B [Source:MGI Symbol;Acc:MGI:96763]	-	-
ENSMUSG00000050138	0	0	9.97514	2.12459	1.93208	389.434	18.2891	73.5554	0	0	2.80636	96.2557	-5.0971	0.0171985	0.271368	Kcnk12	17	87745837	87797994	-	1936	protein_coding	potassium channel, subfamily K, member 12 [Source:MGI Symbol;Acc:MGI:2684043]	-	-
ENSMUSG00000083327	2352.68	2310.4	2418.97	2509.14	1250.05	2270.04	1202.27	1174.92	1236.64	1480.13	2168.25	1472.8	0.557919	0.0172104	0.271369	Vcp-rs	X	104345829	104348234	-	2406	processed_pseudogene	valosin containing protein, related sequence [Source:MGI Symbol;Acc:MGI:894298]	-	-
ENSMUSG00000051278	128.198	116.58	128.679	131.725	153.6	137.097	232.945	136.323	247.722	204.457	131.756	191.709	-0.54117	0.0172263	0.271435	Zgrf1	3	127553489	127618023	+	10553	protein_coding	zinc finger, GRF-type containing 1 [Source:MGI Symbol;Acc:MGI:1918893]	-	-
ENSMUSG00000057666	391.717	101.164	89.7763	84.9837	184.513	38.7447	106.847	52.9599	137.623	70.7737	170.431	81.3897	1.06471	0.0172429	0.27151	Gapdh	6	125161715	125166467	-	4133	protein_coding	glyceraldehyde-3-phosphate dehydrogenase [Source:MGI Symbol;Acc:MGI:95640]	-	-
ENSMUSG00000109734	0	0	0.997514	4.24919	0.966039	0.993454	6.73808	9.80738	14.7454	6.99	1.24255	7.85486	-2.66258	0.0172742	0.271639	Gm45272	7	104908754	104913339	+	1784	lincRNA	predicted gene 45272 [Source:MGI Symbol;Acc:MGI:5791108]	-	-
ENSMUSG00000097131	46.2939	58.7715	36.908	40.3673	81.1473	89.4108	71.2311	85.3242	106.167	71.6475	52.6976	84.7561	-0.681686	0.0172746	0.271639	D230017M19Rik	1	72236465	72274869	+	5335	lincRNA	RIKEN cDNA D230017M19 gene [Source:MGI Symbol;Acc:MGI:2445071]	-	-
ENSMUSG00000025132	5621.74	5487.91	5651.92	5568.56	5284.23	4947.4	4520.29	4939	4509.13	4893	5522.87	4761.76	0.213883	0.0172989	0.271675	Arhgdia	11	120578104	120581624	-	2258	protein_coding	Rho GDP dissociation inhibitor (GDI) alpha [Source:MGI Symbol;Acc:MGI:2178103]	-	-
ENSMUSG00000110626	0	0	0	0	0.966039	22.8494	0.962582	7.84591	0	0	0.193208	6.33159	-4.48058	0.0173004	0.271675	Gm45805	8	126755571	126758334	-	2066	lincRNA	predicted gene 45805 [Source:MGI Symbol;Acc:MGI:5804920]	-	-
ENSMUSG00000093894	0	0	0	0	0.966039	10.928	1.92516	0	3.9321	5.2425	0.193208	4.40555	-3.95922	0.0173402	0.271824	Ighv1-53	12	115158403	115158835	-	351	IG_V_gene	immunoglobulin heavy variable 1-53 [Source:MGI Symbol;Acc:MGI:3576502]	-	-
novel.1084	0	0	18.9528	1.0623	1.93208	152.992	11.551	53.9406	4.91512	8.7375	4.38943	46.4272	-3.3978	0.0173408	0.271824	-	X	38486542	38490990	+	1579	-	- && sp|Q9TTC1|POL_KORV Gag-Pol polyprotein OS=Koala retrovirus OX=394239 GN=pro-pol PE=3 SV=2 && -	-	-
ENSMUSG00000026683	206.542	276.515	228.431	278.322	221.223	243.396	364.819	294.221	360.77	372.217	242.206	327.085	-0.433287	0.0173452	0.271824	Nuf2	1	169497934	169531464	-	6341	protein_coding	NUF2, NDC80 kinetochore complex component [Source:MGI Symbol;Acc:MGI:1914227]	-	-
ENSMUSG00000028583	675.416	590.606	876.815	656.499	450.174	1751.46	607.389	1260.25	693.032	850.158	649.902	1032.46	-0.667784	0.0173891	0.272197	Pdpn	4	143267431	143299564	-	1817	protein_coding	podoplanin [Source:MGI Symbol;Acc:MGI:103098]	-	-
ENSMUSG00000030382	0	0	0	0	0	2.98036	0	1.96148	2.94907	12.2325	0	4.02468	-4.41057	0.01741	0.272197	Slc27a5	7	12988346	12998192	-	2438	protein_coding	solute carrier family 27 (fatty acid transporter), member 5 [Source:MGI Symbol;Acc:MGI:1347100]	-	-
ENSMUSG00000056612	1445.79	1779.53	1702.76	1664.62	2059.59	1306.39	1410.18	1264.17	1636.74	1237.23	1730.46	1370.94	0.336353	0.0174102	0.272197	Ppp1r14b	19	6975048	6977324	+	919	protein_coding	protein phosphatase 1, regulatory inhibitor subunit 14B [Source:MGI Symbol;Acc:MGI:107682]	-	-
ENSMUSG00000047773	0	0	0	0	0	127.162	12.5136	0	0	0	0	27.9351	-7.20098	0.0174209	0.272197	Ankfn1	11	89390223	89777653	-	6173	protein_coding	ankyrin-repeat and fibronectin type III domain containing 1 [Source:MGI Symbol;Acc:MGI:2686021]	-	-
ENSMUSG00000028949	565.023	430.67	490.777	357.994	516.831	364.598	303.213	253.03	394.193	409.789	472.259	344.965	0.452504	0.0174279	0.272197	Smarcd3	5	24590818	24624411	-	5120	protein_coding	SWI/SNF related, matrix associated, actin dependent regulator of chromatin, subfamily d, member 3 [Source:MGI Symbol;Acc:MGI:1914243]	SWI/SNF-BAF60b	SWI/SNF-BAF60b
ENSMUSG00000039084	22.5534	22.1598	37.9055	10.623	13.5245	235.449	20.2142	42.1717	25.5586	10.485	21.3532	66.7756	-1.64356	0.017468	0.272638	Chad	11	94565047	94569127	+	1680	protein_coding	chondroadherin [Source:MGI Symbol;Acc:MGI:1096866]	-	-
ENSMUSG00000113390	0	0	0	0	0.966039	4.96727	1.92516	3.92295	4.91512	1.7475	0.193208	3.4956	-3.62273	0.017506	0.273046	Gm32635	12	106094823	106098971	-	1162	lincRNA	predicted gene, 32635 [Source:MGI Symbol;Acc:MGI:5591794]	-	-
ENSMUSG00000048277	1356.77	1417.26	1504.25	1472.34	1325.41	1139.49	1033.81	1237.69	1165.87	1294.02	1415.21	1174.18	0.269258	0.0175486	0.273518	Syngr2	11	117809668	117814283	+	1776	protein_coding	synaptogyrin 2 [Source:MGI Symbol;Acc:MGI:1328324]	-	-
ENSMUSG00000061086	18.9924	25.0502	28.9279	28.682	47.3359	71.5287	55.8298	41.191	52.1003	41.0662	29.7977	52.3432	-0.806234	0.0175638	0.273518	Myl4	11	104550663	104595753	+	4637	protein_coding	myosin, light polypeptide 4 [Source:MGI Symbol;Acc:MGI:97267]	-	-
ENSMUSG00000113336	0	0.963468	0	1.0623	4.83019	4.96727	4.81291	9.80738	12.7793	6.11625	1.37119	7.69663	-2.45363	0.0175718	0.273518	Gm16497	12	14261534	14285725	+	3010	lincRNA	predicted gene 16497 [Source:MGI Symbol;Acc:MGI:3642481]	-	-
ENSMUSG00000082292	94.9618	17.3424	61.8459	36.1181	30.9132	37.7512	28.8775	12.7496	10.8133	11.3587	48.2363	20.3101	1.24622	0.0176139	0.273988	Gm12250	11	58187739	58189012	+	1274	processed_pseudogene	predicted gene 12250 [Source:MGI Symbol;Acc:MGI:3649299]	-	-
ENSMUSG00000025329	9.49618	7.70774	60.8484	2.12459	2.89812	485.799	41.391	203.013	1.96605	6.11625	16.615	147.657	-3.1508	0.0176637	0.274579	Padi1	4	140812983	140845778	-	3754	protein_coding	peptidyl arginine deiminase, type I [Source:MGI Symbol;Acc:MGI:1338893]	-	-
ENSMUSG00000110690	0	0.963468	0.997514	1.0623	0.966039	5.96072	1.92516	0	16.7114	8.7375	0.797863	6.66696	-3.03944	0.0176825	0.274593	Gm18001	8	83600013	83600700	+	688	processed_pseudogene	predicted gene, 18001 [Source:MGI Symbol;Acc:MGI:5010186]	-	-
ENSMUSG00000030859	0	0	0	0	0.966039	0.993454	7.70066	2.94221	11.7963	0	0.193208	4.68652	-4.04652	0.0176884	0.274593	Fam24a	7	131333864	131336927	+	851	protein_coding	family with sequence similarity 24, member A [Source:MGI Symbol;Acc:MGI:1915473]	-	-
ENSMUSG00000097885	39.1717	23.1232	47.8807	59.4886	54.0982	68.5483	84.7072	105.92	82.5741	44.5612	44.7525	77.2621	-0.786925	0.0177308	0.275066	5031434O11Rik	3	51560035	51567117	+	3731	processed_transcript	RIKEN cDNA 5031434O11 gene [Source:MGI Symbol;Acc:MGI:1923230]	-	-
ENSMUSG00000114417	0	0	0	6.37378	1.93208	22.8494	3.85033	1.96148	6.88117	19.2225	1.66117	10.953	-2.72513	0.0177774	0.275471	Gm34586	13	113672318	113686540	+	927	lincRNA	predicted gene, 34586 [Source:MGI Symbol;Acc:MGI:5593745]	-	-
ENSMUSG00000026546	61.7252	32.7579	59.8509	23.3705	37.6755	343.735	60.6427	85.3242	34.4059	28.8337	43.076	110.588	-1.36055	0.0177851	0.275471	Cfap45	1	172520801	172545870	+	5717	protein_coding	cilia and flagella associated protein 45 [Source:MGI Symbol;Acc:MGI:1919120]	-	-
ENSMUSG00000078490	26.1145	27.9406	49.8757	13.8099	15.4566	190.743	58.7175	68.6517	18.6775	17.475	26.6394	70.853	-1.40966	0.0177943	0.275471	Cfap74	4	155409190	155466823	+	9951	protein_coding	cilia and flagella associated protein 74 [Source:MGI Symbol;Acc:MGI:1917130]	-	-
ENSMUSG00000003528	1522.95	1611.88	1498.27	1723.04	1533.1	1412.69	1384.19	1256.33	1329.05	1270.43	1577.85	1330.54	0.246037	0.0178047	0.275471	Slc25a1	16	17925223	17928219	-	2164	protein_coding	solute carrier family 25 (mitochondrial carrier, citrate transporter), member 1 [Source:MGI Symbol;Acc:MGI:1345283]	-	-
ENSMUSG00000034714	4689.92	2776.71	2818.98	2844.83	1400.76	2691.27	1659.49	938.566	2073.2	1525.57	2906.24	1777.62	0.709121	0.0178403	0.275837	Ttyh2	11	114675431	114720977	+	3739	protein_coding	tweety family member 2 [Source:MGI Symbol;Acc:MGI:2157091]	-	-
ENSMUSG00000066176	0	0	0	0	0	0.993454	2.88775	10.7881	0.983025	1.7475	0	3.47997	-4.19496	0.017876	0.276205	Gm12511	4	55563265	55599296	+	1603	lincRNA	predicted gene 12511 [Source:MGI Symbol;Acc:MGI:3651363]	-	-
ENSMUSG00000068794	11.8702	7.70774	5.98509	4.24919	11.5925	17.8822	35.6155	40.2103	12.7793	6.11625	8.28094	22.5207	-1.44405	0.0178969	0.276342	Col28a1	6	7997808	8192617	-	4904	protein_coding	collagen, type XXVIII, alpha 1 [Source:MGI Symbol;Acc:MGI:2685312]	-	-
ENSMUSG00000058799	3419.81	3230.51	3218.98	4178.01	2861.41	3755.26	4296.97	4548.66	3900.64	4706.01	3381.74	4241.51	-0.326939	0.0179315	0.276691	Nap1l1	10	111473223	111498150	+	4994	protein_coding	nucleosome assembly protein 1-like 1 [Source:MGI Symbol;Acc:MGI:1855693]	-	-
ENSMUSG00000022431	0	3.85387	3.99006	0	0	19.8691	0.962582	16.6725	7.8642	6.11625	1.56879	10.2969	-2.68683	0.0179568	0.276752	Ribc2	15	85132078	85144570	+	1786	protein_coding	RIB43A domain with coiled-coils 2 [Source:MGI Symbol;Acc:MGI:1914997]	-	-
ENSMUSG00000025963	0	1.92694	2.99254	0	0	141.07	23.102	17.6533	0	0	0.983896	36.3651	-5.19606	0.0179594	0.276752	Mdh1b	1	63698819	63730318	-	1719	protein_coding	malate dehydrogenase 1B, NAD (soluble) [Source:MGI Symbol;Acc:MGI:1923918]	-	-
ENSMUSG00000058258	599.446	1138.82	777.064	1423.48	296.574	618.922	538.084	296.183	559.341	433.38	847.076	489.182	0.792188	0.0179949	0.277115	Idi1	13	8885501	8892451	+	3505	protein_coding	isopentenyl-diphosphate delta isomerase [Source:MGI Symbol;Acc:MGI:2442264]	-	-
ENSMUSG00000020034	949.618	964.431	921.703	951.817	926.431	1129.56	1215.74	1079.79	1162.92	1016.17	942.8	1120.84	-0.249422	0.0180121	0.277195	Tcp11l2	10	84576626	84614359	+	3438	protein_coding	t-complex 11 (mouse) like 2 [Source:MGI Symbol;Acc:MGI:2444679]	-	-
ENSMUSG00000052581	0	0	0.997514	0	0	12.9149	0.962582	6.86517	0	2.62125	0.199503	4.67278	-4.04247	0.0180321	0.277318	Lrrtm4	6	80018877	80810143	+	6147	protein_coding	leucine rich repeat transmembrane neuronal 4 [Source:MGI Symbol;Acc:MGI:2389180]	-	-
ENSMUSG00000108361	0	0	0	3.18689	0	2.98036	9.62582	2.94221	4.91512	8.7375	0.637378	5.8402	-3.22171	0.0180471	0.277362	Gm44796	7	24213134	24214385	+	626	processed_transcript	predicted gene 44796 [Source:MGI Symbol;Acc:MGI:5753372]	-	-
ENSMUSG00000072966	237.404	291.931	328.182	366.492	451.14	306.977	509.206	487.427	554.426	538.23	335.03	479.253	-0.51587	0.0180906	0.277845	Gprasp2	X	135839034	135844730	+	4540	protein_coding	G protein-coupled receptor associated sorting protein 2 [Source:MGI Symbol;Acc:MGI:2442071]	-	-
ENSMUSG00000014599	435.637	397.912	481.799	359.056	438.582	333.8	304.176	373.661	328.33	335.52	422.597	335.098	0.334844	0.0181025	0.277845	Csf1	3	107741048	107760469	-	5281	protein_coding	colony stimulating factor 1 (macrophage) [Source:MGI Symbol;Acc:MGI:1339753]	-	-
ENSMUSG00000040354	1559.75	1388.36	1441.41	1333.18	1222.04	1277.58	1011.67	960.143	1142.27	1195.29	1388.95	1117.39	0.313567	0.0181289	0.278065	Mars	10	127296221	127311786	-	3423	protein_coding	methionine-tRNA synthetase [Source:MGI Symbol;Acc:MGI:1345633]	-	-
ENSMUSG00000005338	48.6679	86.7121	278.306	115.79	444.378	44.7054	73.1563	122.592	33.4228	141.547	194.771	83.0848	1.22914	0.018172	0.278336	Cadm3	1	173333258	173367695	-	7248	protein_coding	cell adhesion molecule 3 [Source:MGI Symbol;Acc:MGI:2137858]	-	-
ENSMUSG00000059089	109.206	63.5889	103.741	64.8001	61.8265	427.185	109.734	117.689	59.9645	113.587	80.6326	165.632	-1.03914	0.0181789	0.278336	Fcgr4	1	171018920	171029761	+	1256	protein_coding	Fc receptor, IgG, low affinity IV [Source:MGI Symbol;Acc:MGI:2179523]	-	-
ENSMUSG00000032487	14.2443	30.831	24.9379	33.9935	22.2189	124.182	16.3639	90.2279	32.4398	31.455	25.2451	58.9337	-1.21972	0.0181895	0.278336	Ptgs2	1	150100031	150108227	+	4580	protein_coding	prostaglandin-endoperoxide synthase 2 [Source:MGI Symbol;Acc:MGI:97798]	-	-
ENSMUSG00000020922	1544.32	1034.76	1322.7	957.129	893.586	959.676	708.461	821.859	945.67	832.683	1150.5	853.67	0.430169	0.0182037	0.278336	Lsm12	11	102162497	102185296	-	2388	protein_coding	LSM12 homolog [Source:MGI Symbol;Acc:MGI:1919592]	-	-
ENSMUSG00000074006	11.8702	23.1232	8.97763	10.623	53.1321	0	5.77549	7.84591	13.7623	3.495	21.5452	6.17575	1.80847	0.0182069	0.278336	Omp	7	98143359	98145502	-	2144	protein_coding	olfactory marker protein [Source:MGI Symbol;Acc:MGI:97436]	-	-
ENSMUSG00000109321	5.93511	4.81734	1.99503	4.24919	6.76227	5.96072	19.2516	23.5377	11.7963	8.7375	4.75179	13.8568	-1.54534	0.0183456	0.280068	A330076H08Rik	7	61930137	61982358	-	4448	processed_transcript	RIKEN cDNA A330076H08 gene [Source:MGI Symbol;Acc:MGI:2443193]	-	-
ENSMUSG00000037974	0	0	0	2.12459	0	7.94763	1.92516	5.88443	7.8642	0.87375	0.424919	4.89903	-3.53196	0.0183471	0.280068	Muc5ac	7	141788972	141819231	+	10752	protein_coding	mucin 5, subtypes A and C, tracheobronchial/gastric [Source:MGI Symbol;Acc:MGI:104697]	-	-
ENSMUSG00000031604	2960.43	3902.05	3149.15	4661.36	2430.55	2098.17	2476.72	2058.57	3143.71	2626.49	3420.71	2480.73	0.463504	0.0183565	0.280068	Msmo1	8	64718139	64733792	-	6144	protein_coding	methylsterol monoxygenase 1 [Source:MGI Symbol;Acc:MGI:1913484]	-	-
ENSMUSG00000063531	65.2862	72.2601	55.8608	25.4951	34.7774	202.665	102.996	35.3066	78.642	89.1224	50.7359	101.746	-1.00399	0.018379	0.280225	Sema3e	5	14025276	14256689	+	9285	protein_coding	sema domain, immunoglobulin domain (Ig), short basic domain, secreted, (semaphorin) 3E [Source:MGI Symbol;Acc:MGI:1340034]	-	-
ENSMUSG00000039108	728.832	869.048	952.626	985.811	1161.18	1030.21	1204.19	1347.53	1192.41	1263.44	939.499	1207.56	-0.361711	0.0184152	0.280591	Lsm14b	2	180024987	180035465	+	2892	protein_coding	LSM family member 14B [Source:MGI Symbol;Acc:MGI:3040677]	-	-
ENSMUSG00000044254	39.1717	21.1963	14.9627	36.1181	18.3547	23.8429	5.77549	4.90369	9.83025	8.7375	25.9607	10.618	1.28831	0.0184318	0.280659	Pcsk9	4	106442329	106464329	-	3521	protein_coding	proprotein convertase subtilisin/kexin type 9 [Source:MGI Symbol;Acc:MGI:2140260]	-	-
ENSMUSG00000029153	16.6183	43.3561	67.831	83.9214	61.8265	170.874	64.493	106.9	84.5401	90.8699	54.7106	103.536	-0.917181	0.018471	0.280804	Ociad2	5	73322199	73341028	-	2722	protein_coding	OCIA domain containing 2 [Source:MGI Symbol;Acc:MGI:1916377]	-	-
ENSMUSG00000020671	4986.68	4725.81	5085.33	4498.82	4106.63	3595.31	3674.18	3827.82	4045.15	4307.59	4680.65	3890.01	0.266829	0.0184714	0.280804	Rab10	12	3247428	3309969	-	3513	protein_coding	RAB10, member RAS oncogene family [Source:MGI Symbol;Acc:MGI:105066]	-	-
ENSMUSG00000012126	35.6107	23.1232	39.9006	36.1181	61.8265	132.129	50.0543	77.4783	46.2022	58.5412	39.3158	72.8811	-0.888448	0.0184862	0.280804	Ubxn11	4	134102570	134127593	+	4742	protein_coding	UBX domain protein 11 [Source:MGI Symbol;Acc:MGI:1914836]	-	-
ENSMUSG00000043924	2.37404	0	19.9503	2.12459	2.89812	97.3585	2.88775	42.1717	8.84722	1.7475	5.46941	30.6025	-2.47954	0.01849	0.280804	Ncmap	4	135369576	135398227	-	2227	protein_coding	noncompact myelin associated protein [Source:MGI Symbol;Acc:MGI:2444888]	-	-
ENSMUSG00000046908	18.9924	13.4886	20.9478	29.7443	22.2189	2.98036	7.70066	19.6148	3.9321	6.99	21.0784	8.24358	1.35441	0.018517	0.28103	Ltb4r1	14	55765962	55768494	+	1394	protein_coding	leukotriene B4 receptor 1 [Source:MGI Symbol;Acc:MGI:1309472]	-	-
ENSMUSG00000031027	0	7.70774	0	2.12459	10.6264	28.8102	15.4013	30.4029	12.7793	3.495	4.09175	18.1777	-2.13059	0.0185422	0.281227	Stk33	7	109279223	109439081	-	2654	protein_coding	serine/threonine kinase 33 [Source:MGI Symbol;Acc:MGI:2152419]	-	-
ENSMUSG00000028927	30.8626	26.9771	36.908	33.9935	35.7434	111.267	35.6155	149.072	30.4738	29.7075	32.8969	71.2272	-1.11308	0.0185659	0.281337	Padi2	4	140906344	140952586	+	5013	protein_coding	peptidyl arginine deiminase, type II [Source:MGI Symbol;Acc:MGI:1338892]	-	-
ENSMUSG00000060863	7.12213	2.8904	1.99503	25.4951	17.3887	39.7382	26.9523	32.3644	13.7623	40.1925	10.9783	30.6019	-1.48101	0.0185738	0.281337	Tcl1b2	12	105146014	105155225	+	1257	protein_coding	T cell leukemia/lymphoma 1B, 2 [Source:MGI Symbol;Acc:MGI:1351609]	-	-
ENSMUSG00000041287	0	0	0	3.18689	0.966039	0	5.77549	9.80738	9.83025	11.3587	0.830586	7.35437	-3.15246	0.0185886	0.281376	Sox15	11	69655314	69656727	+	861	protein_coding	SRY (sex determining region Y)-box 15 [Source:MGI Symbol;Acc:MGI:98363]	HMG	HMG
ENSMUSG00000034968	214.851	128.141	126.684	104.105	126.551	78.4828	111.66	69.6324	107.15	94.3649	140.067	92.2579	0.599648	0.0186304	0.281479	Lbx2	6	83086367	83088243	+	934	protein_coding	ladybird homeobox 2 [Source:MGI Symbol;Acc:MGI:1342288]	HB-other	HB->HB-other
ENSMUSG00000029189	372.725	324.689	217.458	382.427	498.476	355.656	639.155	435.448	479.716	881.613	359.155	558.318	-0.636913	0.0186424	0.281479	Sel1l3	5	53107083	53213927	-	9850	protein_coding	sel-1 suppressor of lin-12-like 3 (C. elegans) [Source:MGI Symbol;Acc:MGI:1916941]	-	-
ENSMUSG00000029769	64.0992	67.4428	167.582	88.1706	123.653	425.198	119.36	228.512	115.997	102.229	102.19	198.259	-0.954554	0.0186496	0.281479	Ccdc136	6	29396309	29426994	+	4334	protein_coding	coiled-coil domain containing 136 [Source:MGI Symbol;Acc:MGI:1918128]	-	-
novel.1116	0	1.92694	0	9.56067	2.89812	4.96727	12.5136	19.6148	9.83025	15.7275	2.87714	12.5307	-2.12188	0.0186684	0.281479	-	X	93954637	93967062	-	822	-	- && - && -	-	-
[truncated: 28,629 more rows]

## Sheet: diff-CON VS V30
List of differences analysed between CON and V30
[truncated: 30,179 more rows]
