# Supplementary material for: Transcriptome analysis during 4-vinylcyclohexene diepoxide exposure-induced premature ovarian insufficiency in mice
Source: PeerJ. 2024 Apr 18;12:e17251. doi: 10.7717/peerj.17251 (PMC11032656; doi:10.7717/peerj.17251)
Supplement: Table S4 — The HE section count results of primordial follicles, primary follicles (PF), secondary follicles (SF), antral follicles (AF) and corpus luteum (CL) [file peerj-12-17251-s006.xlsx]

## Sheet: Sheet
	primordial follicle			primary follicle			secondary follicle			antral follicle			corpus luteum
	CON	V15	V30	CON	V15	V30	CON	V15	V30	CON	V15	V30	CON	V15	V30
1	21	8	3	7	3	1	4	2	1	1	1	0	3	0	0
2	22	6	2	12	1	0	1	1	0	2	0	0	1	0	0
3	32	9	2	6	5	0	3	0	0	3	1	0	1	0	0
4	23	11	0	8	1	0	5	2	0	2	1	1	2	1	0
5	15	14	1	11	1	0	1	2	0	2	0	0	2	1	0
6	20	8	3	15	2	1	1	1	0	2	0	1	3	0	0
7	27	5	2	8	3	1	1	0	1	1	1	0	2	0	1
8	22	13	2	6	2	2	2	3	0	4	2	0	1	1	0
9	32	13	1	7	1	2	3	1	1	3	1	1	2	0	0
10	11	7	1	5	3	0	4	2	0	1	0	0	2	0	1
