# Supplementary material for: Transcriptome analysis during 4-vinylcyclohexene diepoxide exposure-induced premature ovarian insufficiency in mice
Source: PeerJ. 2024 Apr 18;12:e17251. doi: 10.7717/peerj.17251 (PMC11032656; doi:10.7717/peerj.17251)
Supplement: Table S5 — Serum measurements of AMH FSH estrogens in mice [file peerj-12-17251-s007.xlsx]

## Sheet: AMH
Serum AMH concentration (pg/ml）
CON	V15	V30
481.633	458.607	454.923
536.896	461.37	403.344
497.291	428.212	469.66
458.607	450.318	437.028
461.37	445.712	415.318
499.133	423.607	401.502
431.897	412.555	454.002
424.528	462.686	446.634
477.949	459.002	428.87
482.555	419.002	458.607

## Sheet: FSH
Serum FSH concentration (U/L）
CON	V15	V30
34.1583	32.9092	34.2719
38.36	33.7041	35.1804
35.521	35.521	35.1804
37.4516	35.9753	34.6126
33.7041	34.6126	37.9058
33.2498	35.7482	37.9058
38.2465	34.7261	33.2498
35.7482	32.4549	40.9719
28.4803	33.8176	35.6346
30.1837	38.1329	38.9278

## Sheet: E2
Serum E2 concentration (pmol/L）
CON	V15	V30
71.265	68.9193	66.7867
71.265	68.706	70.1988
68.4928	59.1097	65.294
67	68.4928	66.7867
71.9048	74.0373	72.971
77.4493	71.265	69.3457
69.1325	68.9193	67
82.1407	67.4265	63.588
82.1407	67.4265	68.2795
