# Supplementary material for: Transcriptome analysis during 4-vinylcyclohexene diepoxide exposure-induced premature ovarian insufficiency in mice
Source: PeerJ. 2024 Apr 18;12:e17251. doi: 10.7717/peerj.17251 (PMC11032656; doi:10.7717/peerj.17251)
Supplement: Table S6 — Sort PPI results by node degree from highest to lowest. [file peerj-12-17251-s008.xlsx]

## Sheet: PPI results of CON vs V15
name	shared name	Degree	AverageShortestPathLength	BetweennessCentrality	ClosenessCentrality	ClusteringCoefficient	Eccentricity	IsSingleNode	NeighborhoodConnectivity	NumberOfDirectedEdges	NumberOfUndirectedEdges	PartnerOfMultiEdgedNodePairs	Radiality	selected	SelfLoops	Stress	TopologicalCoefficient
Oog3	Oog3	22	3.8125	0.391105	0.262295	0.528139	9	FALSE	12.3636	22	0	0	0.744318	FALSE	0	1506	0.494545
Oog4	Oog4	19	4.375	0.0203162	0.228571	0.690058	10	FALSE	13.8421	19	0	0	0.693182	FALSE	0	132	0.576754
Oog2	Oog2	19	4.375	0.0353871	0.228571	0.672515	10	FALSE	13.6842	19	0	0	0.693182	FALSE	0	322	0.570175
C87414	C87414	15	4.47917	0	0.223256	1	10	FALSE	16	15	0	0	0.683712	FALSE	0	0	0.695652
Pramef12	Pramef12	15	4.47917	0	0.223256	1	10	FALSE	16	15	0	0	0.683712	FALSE	0	0	0.695652
C87499	C87499	15	4.47917	0	0.223256	1	10	FALSE	16	15	0	0	0.683712	FALSE	0	0	0.695652
Gm10436	Gm10436	15	4.47917	0	0.223256	1	10	FALSE	16	15	0	0	0.683712	FALSE	0	0	0.695652
Gm13084	Gm13084	15	4.47917	0	0.223256	1	10	FALSE	16	15	0	0	0.683712	FALSE	0	0	0.695652
Gm13023	Gm13023	15	4.47917	0	0.223256	1	10	FALSE	16	15	0	0	0.683712	FALSE	0	0	0.695652
Gm13103	Gm13103	15	4.47917	0	0.223256	1	10	FALSE	16	15	0	0	0.683712	FALSE	0	0	0.695652
Oog1	Oog1	15	4.47917	0	0.223256	1	10	FALSE	16	15	0	0	0.683712	FALSE	0	0	0.695652
C87977	C87977	15	4.47917	0	0.223256	1	10	FALSE	16	15	0	0	0.683712	FALSE	0	0	0.695652
Pramef20	Pramef20	15	4.47917	0	0.223256	1	10	FALSE	16	15	0	0	0.683712	FALSE	0	0	0.695652
C87414-2	C87414-2	15	4.47917	0	0.223256	1	10	FALSE	16	15	0	0	0.683712	FALSE	0	0	0.695652
Gm3106	Gm3106	15	4.47917	0	0.223256	1	10	FALSE	16	15	0	0	0.683712	FALSE	0	0	0.695652
D5Ertd577e	D5Ertd577e	15	4.47917	0	0.223256	1	10	FALSE	16	15	0	0	0.683712	FALSE	0	0	0.695652
Dnaic1	Dnaic1	12	1	0.231818	1	0.575758	1	FALSE	7.33333	12	0	0	1	FALSE	0	56	0.611111
Dnah5	Dnah5	11	1.08333	0.10303	0.923077	0.672727	2	FALSE	7.90909	11	0	0	0.958333	FALSE	0	36	0.659091
Dnah1	Dnah1	9	1.25	0.0121212	0.8	0.888889	2	FALSE	8.88889	9	0	0	0.875	FALSE	0	8	0.740741
Dnah10	Dnah10	9	1.25	0.0121212	0.8	0.888889	2	FALSE	8.88889	9	0	0	0.875	FALSE	0	8	0.740741
Wdr63	Wdr63	9	1.25	0.0121212	0.8	0.888889	2	FALSE	8.88889	9	0	0	0.875	FALSE	0	8	0.740741
Casc1	Casc1	8	1.33333	0	0.75	1	2	FALSE	9.25	8	0	0	0.833333	FALSE	0	0	0.770833
Cfap70	Cfap70	8	1.33333	0	0.75	1	2	FALSE	9.25	8	0	0	0.833333	FALSE	0	0	0.770833
Dnah7c	Dnah7c	8	1.33333	0	0.75	1	2	FALSE	9.25	8	0	0	0.833333	FALSE	0	0	0.770833
Dnah6	Dnah6	8	1.33333	0	0.75	1	2	FALSE	9.25	8	0	0	0.833333	FALSE	0	0	0.770833
Oosp3	Oosp3	8	4.10417	0.10232	0.243655	0.571429	9	FALSE	11	8	0	0	0.717803	FALSE	0	1042	0.44
Gdf9	Gdf9	7	4.54167	0.374557	0.220183	0.428571	8	FALSE	4.57143	7	0	0	0.67803	FALSE	0	1602	0.340659
Ccdc65	Ccdc65	7	1.41667	0.030303	0.705882	0.714286	2	FALSE	8.42857	7	0	0	0.791667	FALSE	0	12	0.702381
Obox7	Obox7	7	4.625	0.00960402	0.216216	0.761905	10	FALSE	11.8571	7	0	0	0.670455	FALSE	0	194	0.494048
Asz1	Asz1	6	5.60417	0.00975177	0.178439	0.866667	9	FALSE	5.5	6	0	0	0.581439	FALSE	0	130	0.785714
Mael	Mael	6	4.75	0.223404	0.210526	0.666667	8	FALSE	5.5	6	0	0	0.659091	FALSE	0	1134	0.592593
Tdrd9	Tdrd9	6	5.60417	0.00975177	0.178439	0.866667	9	FALSE	5.5	6	0	0	0.581439	FALSE	0	130	0.785714
Tdrd1	Tdrd1	6	5.60417	0.00975177	0.178439	0.866667	9	FALSE	5.5	6	0	0	0.581439	FALSE	0	130	0.785714
Mov10l1	Mov10l1	6	5.60417	0.00975177	0.178439	0.866667	9	FALSE	5.5	6	0	0	0.581439	FALSE	0	130	0.785714
Nlrp5	Nlrp5	6	5.29167	0.190603	0.188976	0.466667	9	FALSE	5.16667	6	0	0	0.609848	FALSE	0	952	0.430556
Obox2	Obox2	6	4.64583	0.00945626	0.215247	0.733333	10	FALSE	10.8333	6	0	0	0.668561	FALSE	0	192	0.451389
Nlrp4b	Nlrp4b	6	4.64583	0.00014775	0.215247	0.933333	10	FALSE	13.5	6	0	0	0.668561	FALSE	0	2	0.5625
Tcl1b1	Tcl1b1	6	3.6875	0.442154	0.271186	0.4	8	FALSE	7	6	0	0	0.755682	FALSE	0	1950	0.28
Armc4	Armc4	5	1.58333	0.0227273	0.631579	0.7	2	FALSE	7.2	5	0	0	0.708333	FALSE	0	6	0.6
Zp1	Zp1	5	5.33333	0.00820035	0.1875	0.6	9	FALSE	5.2	5	0	0	0.606061	FALSE	0	50	0.472727
Henmt1	Henmt1	5	5.625	0	0.177778	1	9	FALSE	6	5	0	0	0.579545	FALSE	0	0	0.857143
Zp3	Zp3	5	5.4375	0.00044326	0.183908	0.8	9	FALSE	4.8	5	0	0	0.596591	FALSE	0	4	0.685714
Khdc3	Khdc3	5	6.16667	0.0132979	0.162162	0.8	10	FALSE	4.6	5	0	0	0.530303	FALSE	0	140	0.657143
Tle6	Tle6	5	6.16667	0.0132979	0.162162	0.8	10	FALSE	4.6	5	0	0	0.530303	FALSE	0	140	0.657143
Ooep	Ooep	5	6.16667	0.0132979	0.162162	0.8	10	FALSE	4.6	5	0	0	0.530303	FALSE	0	140	0.657143
Bmp15	Bmp15	4	5.45833	0.00022163	0.183206	0.833333	9	FALSE	5	4	0	0	0.594697	FALSE	0	2	0.714286
Lrrc6	Lrrc6	4	1.66667	0	0.6	1	2	FALSE	8.75	4	0	0	0.666667	FALSE	0	0	0.729167
Zp2	Zp2	4	5.45833	0.00022163	0.183206	0.833333	9	FALSE	5.25	4	0	0	0.594697	FALSE	0	2	0.75
Tdrd12	Tdrd12	4	6.52083	0	0.153355	1	10	FALSE	6	4	0	0	0.498106	FALSE	0	0	1
Nobox	Nobox	4	5.45833	0.00022163	0.183206	0.833333	9	FALSE	5.25	4	0	0	0.594697	FALSE	0	2	0.75
Dazl	Dazl	4	4.02083	0.562943	0.248705	0.166667	7	FALSE	4.5	4	0	0	0.725379	FALSE	0	2584	0.285714
Padi6	Padi6	4	6.1875	0	0.161616	1	10	FALSE	5.25	4	0	0	0.528409	FALSE	0	0	0.75

## Sheet: PPI results of CON vs V30
name	shared name	Degree	AverageShortestPathLength	BetweennessCentrality	ClosenessCentrality	ClusteringCoefficient	Eccentricity	IsSingleNode	NeighborhoodConnectivity	NumberOfDirectedEdges	NumberOfUndirectedEdges	PartnerOfMultiEdgedNodePairs	Radiality	selected	SelfLoops	Stress	TopologicalCoefficient
Kif11	Kif11	41	1.51389	0.0753405	0.66055	0.428049	3	FALSE	21.0976	41	0	0	0.897222	FALSE	0	2642	0.31966
Bub1b	Bub1b	41	1.51389	0.0729474	0.66055	0.446341	3	FALSE	21.4634	41	0	0	0.897222	FALSE	0	2324	0.325203
Cdc20	Cdc20	38	1.54167	0.0896344	0.648649	0.440967	3	FALSE	21.2368	38	0	0	0.891667	FALSE	0	2990	0.316968
Bub1	Bub1	36	1.58333	0.0220559	0.631579	0.555556	3	FALSE	23.9444	36	0	0	0.883333	FALSE	0	1290	0.362795
Cenpe	Cenpe	36	1.58333	0.0514563	0.631579	0.461905	3	FALSE	22.1944	36	0	0	0.883333	FALSE	0	1992	0.336279
Cdk1	Cdk1	35	1.59722	0.0621543	0.626087	0.489076	3	FALSE	22.5429	35	0	0	0.880556	FALSE	0	1904	0.346374
Plk1	Plk1	35	1.58333	0.10144	0.631579	0.4	3	FALSE	20.4	35	0	0	0.883333	FALSE	0	3232	0.308658
Cdca8	Cdca8	34	1.65278	0.0273256	0.605042	0.543672	3	FALSE	23.8824	34	0	0	0.869444	FALSE	0	1286	0.379085
Kif20a	Kif20a	33	1.625	0.0280355	0.615385	0.543561	3	FALSE	23.9697	33	0	0	0.875	FALSE	0	1370	0.363177
Cenpf	Cenpf	33	1.63889	0.0259484	0.610169	0.543561	3	FALSE	23.8788	33	0	0	0.872222	FALSE	0	1120	0.367366
Ccna2	Ccna2	32	1.58333	0.100724	0.631579	0.558468	3	FALSE	24.1875	32	0	0	0.883333	FALSE	0	3090	0.354779
Dlgap5	Dlgap5	28	1.73611	0.0100612	0.576	0.621693	4	FALSE	24.8929	28	0	0	0.852778	FALSE	0	654	0.388951
Birc5	Birc5	28	1.73611	0.00727962	0.576	0.648148	3	FALSE	25.5714	28	0	0	0.852778	FALSE	0	506	0.405896
Nuf2	Nuf2	26	1.76389	0.0130744	0.566929	0.609231	4	FALSE	25	26	0	0	0.847222	FALSE	0	550	0.390625
Top2a	Top2a	25	1.73611	0.0127556	0.576	0.656667	3	FALSE	26.4	25	0	0	0.852778	FALSE	0	740	0.4
Aurkb	Aurkb	25	1.79167	0.00914483	0.55814	0.656667	3	FALSE	26.48	25	0	0	0.841667	FALSE	0	506	0.427097
Ccnb1	Ccnb1	24	1.80556	0.0107457	0.553846	0.619565	3	FALSE	24.2917	24	0	0	0.838889	FALSE	0	446	0.391801
Pbk	Pbk	23	1.84722	0.00299869	0.541353	0.727273	4	FALSE	27.1304	23	0	0	0.830556	FALSE	0	202	0.444761
Aspm	Aspm	22	1.83333	0.00831334	0.545455	0.636364	4	FALSE	24.6818	22	0	0	0.833333	FALSE	0	442	0.391775
Ube2c	Ube2c	22	1.79167	0.021065	0.55814	0.675325	3	FALSE	26.3182	22	0	0	0.841667	FALSE	0	994	0.404895
Aurka	Aurka	22	1.77778	0.045639	0.5625	0.558442	3	FALSE	24.8636	22	0	0	0.844444	FALSE	0	1850	0.381818
Ccnb2	Ccnb2	22	1.81944	0.00811412	0.549618	0.675325	3	FALSE	26.5455	22	0	0	0.836111	FALSE	0	416	0.421356
Kif23	Kif23	21	1.88889	0.012937	0.529412	0.552381	4	FALSE	23.7143	21	0	0	0.822222	FALSE	0	542	0.388759
Ttk	Ttk	21	1.86111	0.00523151	0.537313	0.657143	4	FALSE	25.7143	21	0	0	0.827778	FALSE	0	374	0.414747
Nusap1	Nusap1	20	1.88889	0.00146873	0.529412	0.821053	4	FALSE	29.5	20	0	0	0.822222	FALSE	0	136	0.483607
Ncapg	Ncapg	20	1.88889	0.0741843	0.529412	0.526316	4	FALSE	23.25	20	0	0	0.822222	FALSE	0	2618	0.375
Kif4	Kif4	19	2.02778	0.00766029	0.493151	0.602339	4	FALSE	24.6316	19	0	0	0.794444	FALSE	0	256	0.432133
Mad2l1	Mad2l1	19	1.86111	0.00237577	0.537313	0.760234	3	FALSE	28.4737	19	0	0	0.827778	FALSE	0	148	0.451963
Espl1	Espl1	19	1.91667	0.00568993	0.521739	0.654971	4	FALSE	26.2632	19	0	0	0.816667	FALSE	0	358	0.437719
Prc1	Prc1	17	1.90278	0.0092811	0.525547	0.558824	3	FALSE	24.4118	17	0	0	0.819444	FALSE	0	430	0.393738
Cenpa	Cenpa	17	1.90278	0.00467664	0.525547	0.823529	3	FALSE	30.2353	17	0	0	0.819444	FALSE	0	182	0.487666
Melk	Melk	16	1.95833	0.00210894	0.510638	0.708333	4	FALSE	26.875	16	0	0	0.808333	FALSE	0	132	0.440574
Kif15	Kif15	13	2.18056	0.00135511	0.458599	0.782051	4	FALSE	27.6923	13	0	0	0.763889	FALSE	0	60	0.532544
Cep55	Cep55	13	2.11111	0.00150828	0.473684	0.717949	4	FALSE	27.3846	13	0	0	0.777778	FALSE	0	78	0.480432
Racgap1	Racgap1	12	2.22222	0.0042758	0.45	0.515152	4	FALSE	19.1667	12	0	0	0.755556	FALSE	0	130	0.383333
Mki67	Mki67	12	2.05556	0.00084368	0.486486	0.818182	4	FALSE	29.4167	12	0	0	0.788889	FALSE	0	62	0.507184
Foxm1	Foxm1	11	2.01389	0.00065576	0.496552	0.8	3	FALSE	29.7273	11	0	0	0.797222	FALSE	0	58	0.495455
Nek2	Nek2	11	2.04167	0.00029579	0.489796	0.836364	4	FALSE	32	11	0	0	0.791667	FALSE	0	30	0.542373
Kif18a	Kif18a	11	2.05556	0.00315844	0.486486	0.618182	4	FALSE	26	11	0	0	0.788889	FALSE	0	132	0.448276
Ect2	Ect2	10	2.09722	0.00303173	0.476821	0.666667	4	FALSE	24.9	10	0	0	0.780556	FALSE	0	144	0.436842
Spag5	Spag5	10	2.125	0.00014828	0.470588	0.888889	4	FALSE	31.2	10	0	0	0.775	FALSE	0	10	0.567273
Brca1	Brca1	9	2.44444	0.0305842	0.409091	0.25	4	FALSE	7.11111	9	0	0	0.711111	FALSE	0	1208	0.218638
Sgo1	Sgo1	9	2.125	0.00091901	0.470588	0.805556	4	FALSE	26.6667	9	0	0	0.775	FALSE	0	60	0.484848
Rad51	Rad51	9	2.20833	0.0526469	0.45283	0.333333	4	FALSE	11.2222	9	0	0	0.758333	FALSE	0	1814	0.220044
Kif22	Kif22	7	2.15278	0.00179316	0.464516	0.52381	4	FALSE	21.2857	7	0	0	0.769444	FALSE	0	118	0.387013
Cdca5	Cdca5	7	2.20833	0.00019562	0.45283	0.857143	4	FALSE	26.5714	7	0	0	0.758333	FALSE	0	8	0.510989
Brca2	Brca2	7	2.30556	0.0370763	0.433735	0.428571	4	FALSE	10.1429	7	0	0	0.738889	FALSE	0	1278	0.222222
Exo1	Exo1	7	2.83333	0.0056827	0.352941	0.52381	4	FALSE	6.14286	7	0	0	0.633333	FALSE	0	160	0.361345
Smc2	Smc2	7	2.29167	0.0112705	0.436364	0.52381	4	FALSE	19.1429	7	0	0	0.741667	FALSE	0	596	0.382857
Tacc3	Tacc3	6	2.19444	0.00113868	0.455696	0.666667	4	FALSE	23.6667	6	0	0	0.761111	FALSE	0	42	0.438272
Chek1	Chek1	6	2.31944	0.0272677	0.431138	0.4	3	FALSE	10.8333	6	0	0	0.736111	FALSE	0	930	0.253968
Kif20b	Kif20b	6	2.30556	0.00066733	0.433735	0.666667	4	FALSE	23.8333	6	0	0	0.738889	FALSE	0	30	0.476667
Cks2	Cks2	5	2.25	0	0.444444	1	4	FALSE	30.2	5	0	0	0.75	FALSE	0	0	0.604
Ska3	Ska3	5	2.22222	8.141e-05	0.45	0.8	4	FALSE	30.8	5	0	0	0.755556	FALSE	0	8	0.581132
Sgo2a	Sgo2a	5	2.33333	0	0.428571	1	4	FALSE	27	5	0	0	0.733333	FALSE	0	0	0.574468
Anln	Anln	4	2.43056	0	0.411429	1	4	FALSE	21	4	0	0	0.713889	FALSE	0	0	0.488372
Kntc1	Kntc1	4	2.15278	0.00642494	0.464516	0.5	3	FALSE	28.25	4	0	0	0.769444	FALSE	0	370	0.5
Cpeb1	Cpeb1	4	2.29167	0	0.436364	1	4	FALSE	28.5	4	0	0	0.741667	FALSE	0	0	0.581633
Blm	Blm	4	2.94444	9.781e-05	0.339623	0.833333	4	FALSE	7.25	4	0	0	0.611111	FALSE	0	2	0.557692
Fancd2	Fancd2	4	3	0.00056039	0.333333	0.833333	5	FALSE	7	4	0	0	0.6	FALSE	0	32	0.5
Spdl1	Spdl1	4	2.18056	0	0.458599	1	4	FALSE	37.5	4	0	0	0.763889	FALSE	0	0	0.669643
Fbxo43	Fbxo43	4	2.26389	0	0.441718	1	4	FALSE	33	4	0	0	0.747222	FALSE	0	0	0.66
Kif14	Kif14	4	2.44444	8.259e-05	0.409091	0.666667	4	FALSE	23.5	4	0	0	0.711111	FALSE	0	4	0.559524
Mcm10	Mcm10	4	3.22222	0.00101306	0.310345	0.5	4	FALSE	5	4	0	0	0.555556	FALSE	0	22	0.555556
Pole	Pole	4	3.02778	0.00227446	0.330275	0.5	4	FALSE	5.75	4	0	0	0.594444	FALSE	0	62	0.479167
Ncapd2	Ncapd2	4	2.81944	0	0.35468	1	5	FALSE	8.75	4	0	0	0.636111	FALSE	0	0	0.416667
Ncapg2	Ncapg2	4	2.81944	0	0.35468	1	5	FALSE	8.75	4	0	0	0.636111	FALSE	0	0	0.416667
Smc4	Smc4	4	2.81944	0	0.35468	1	5	FALSE	8.75	4	0	0	0.636111	FALSE	0	0	0.416667
Tpx2	Tpx2	3	2.375	0	0.421053	1	4	FALSE	23	3	0	0	0.725	FALSE	0	0	0.511111
Fanci	Fanci	3	3.18056	0	0.31441	1	5	FALSE	6.66667	3	0	0	0.563889	FALSE	0	0	0.606061
Cenpi	Cenpi	3	2.40278	0	0.416185	1	4	FALSE	31.3333	3	0	0	0.719444	FALSE	0	0	0.681159
Mcm6	Mcm6	3	2.47222	0.0192469	0.404494	0.333333	4	FALSE	13.3333	3	0	0	0.705556	FALSE	0	646	0.371429
Ezh2	Ezh2	2	2.375	0.00133144	0.421053	0	3	FALSE	22	2	0	0	0.725	FALSE	0	84	0.512195
